# Supplementary material for: A massively parallel 3′ UTR reporter assay reveals relationships between nucleotide content, sequence conservation, and mRNA destabilization
Source: HighWire-hosted journal article supplement (doi:10.1101/gr.242552.118), 2019-05-31
Supplement: Supplemental_Table_1.xlsx [file Supplemental_Table_1.xlsx]

## Sheet: Table 1
Peakname	Type	Rapidly_evolving	Locus	Gene_symbol	N_barcodes	total_gDNA_reads	steady_state_mRNA	normalized_RNA_reads	sequences	GCcontent	AUcontent	PhyloP	Abs_PhyloP	AbsPhyloP_minus_PhyloP	Folding_energy	icSHAPE_gini_statistic
main_Ndufa11_chr17:56722084-56722154_11633	Mouse 3' UTR GCLiPP Peak	No	chr17:56722084-56722154	Ndufa11	19	710	0.649735	471.175	CCCCAAGGTGTGAGCCAAACCCCTGTGACAAATAAACGCTGTATGTTCCTGTGTGCAATGTCTTAAAGGC	0.485714	0.514286	-0.0332254	0.966634	0.999859	-11.3	0.742577
rapidmain_Hist1h4i_chr13:22040942-22041012_6934	Mouse 3' UTR GCLiPP Peak	Yes	chr13:22040942-22041012	Hist1h4i	9	272	0.961585	267.143	AGCTGCTCAGTTTCTTCCAATGCTACTTAAAGGCCCTTTTTAGGGCCACCACAAAATCAAAAGAGCTAAG	0.428571	0.571429	-0.270789	1.3407	1.61149	-15.6	0.628864
main_1810043H04Rik_chr11:120100310-120100380_5803	Mouse 3' UTR GCLiPP Peak	No	chr11:120100310-120100380	1810043H04Rik	32	1530	1.45223	2269.42	GGCTGTTTCCCGGCAGTGTGTACATGAGGATCTGGATTTGGTTGAGATGTAACATGAAGATGATTTAATT	0.414286	0.585714	-0.0424648	0.601563	0.644028	-12.3	0.518199
main_Rpl37_chr15:5118613-5118683_8447	Mouse 3' UTR GCLiPP Peak	No	chr15:5118613-5118683	Rpl37	10	503	1.43037	734.861	TCGCAGCATCCAGTTCTTCTTAAGGATTTCAATCAGTCATAAAATAAATGTTCTGCTTTCAAAAATTCTG	0.328571	0.671429	0.959648	1.23227	0.27262	-3.8	0.627061
main_Ciapin1_chr8:94822569-94822639_24657	Mouse 3' UTR GCLiPP Peak	No	chr8:94822569-94822639	Ciapin1	32	1445	2.79063	4118.68	CCCCGTTTTACTGTAGTGTTGTATCTGTGTCCTGTTGTCATTTCTGTTAAATGGTATTAAACTTTTGTGT	0.357143	0.642857	0.302845	0.748113	0.445268	-6.4	0.55577
main_Rpsa_chr9:120131496-120131566_26626	Mouse 3' UTR GCLiPP Peak	No	chr9:120131496-120131566	Rpsa	28	986	1.53922	1550.12	TGCTGTGCAGGTGCCTGAGCAAAGGGAAAAAAGATGGAAGGAAAATAAAGTTGCTAAAAGCTGTCTTATG	0.414286	0.585714	0.141113	0.757986	0.616873	-7.6	0.494732
main_Nhp2l1_chr15:82041994-82042064_9304	Mouse 3' UTR GCLiPP Peak	No	chr15:82041994-82042064	Nhp2l1	17	385	1.60494	631.116	GTGTATCATATTGTCTGTTAGCATGTACTATTTTCAACCAGTTACTATTATATTGTACTACATCTGCGTT	0.314286	0.685714	0.809338	0.900127	0.0907887	-3.9	0.457407
main_Hmgn2_chr4:133965487-133965557_18225	Mouse 3' UTR GCLiPP Peak	No	chr4:133965487-133965557	Hmgn2	72	3765	2.12342	8165.6	GTGCTGGAGATGCCAAGTGATGTGTGTGCATTTTTGATAACTGTGTACTTCTGGTGACTGTACAGTTTGA	0.428571	0.571429	2.48701	2.48701	0	-11.9	0.344842
main_Nucks1_chr1:131932826-131932896_925	Mouse 3' UTR GCLiPP Peak	No	chr1:131932826-131932896	Nucks1	3	57	1.26224	73.4861	GACATGTTTGTCTCAGACAGTGTCATTTTCTTATAGGTGTTCATAGGACAAAGGGTTATTTAAGAAATAT	0.328571	0.671429	0.579197	0.703732	0.124535	-13.2	0.463051
main_Hnrnpa0_chr13:58126589-58126659_7324	Mouse 3' UTR GCLiPP Peak	No	chr13:58126589-58126659	Hnrnpa0	4	113	0.419476	48.4144	TTGACATGGTTGGTTCTTTCTATGAGAATTTACTTCAAAACATGTACTGTGTAGTTTAAAAAAAATAGTT	0.271429	0.728571	1.37765	1.39018	0.0125352	-9	0.372999
main_Rpl14_chr9:120574373-120574443_26631	Mouse 3' UTR GCLiPP Peak	No	chr9:120574373-120574443	Rpl14	17	666	0.762562	518.725	GCGGCTGGCAAGAAAGCGTGAGGCTACACAGAATAATAAAGGTTCTTTTTGACGGTGGTAAATCTCATGT	0.442857	0.557143	0.58138	0.986676	0.405296	-14.2	0.585109
main_Ube2h_chr6:30214095-30214165_20677	Mouse 3' UTR GCLiPP Peak	No	chr6:30214095-30214165	Ube2h	60	2606	0.961425	2559.04	ACGGGGCCTGTTGATCCATTGCCTGGACTGAGCTGTGAAACTGGACGCGGTTTTGGTTTTTTGTTTTGTG	0.5	0.5	0.223324	0.753099	0.529775	-14.1	0.653199
main_Tpt1_chr14:75848237-75848307_8337	Mouse 3' UTR GCLiPP Peak	No	chr14:75848237-75848307	Tpt1	4	83	1.30536	110.661	TTTTTTAAGGAAAAAAAACATGTCATGTGGGTTGTCTAAAAATAAAGTGCATTTAAATCCACTTAAGAAC	0.271429	0.728571	1.63927	1.67389	0.0346197	-6.8	0.788092
main_Znrf2_chr6:54888743-54888813_20932	Mouse 3' UTR GCLiPP Peak	No	chr6:54888743-54888813	Znrf2	13	393	1.19536	479.821	TTTAGTAAGTTCTTAGAGCTGCTGTTTTAATGTGTTTGGTTTTGGTTTGTTTGTTGGTTGGGGTTTTTTT	0.328571	0.671429	0.699225	0.814634	0.115408	-5.1	0.534475
main_Spg21_chr9:65487382-65487452_26004	Mouse 3' UTR GCLiPP Peak	No	chr9:65487382-65487452	Spg21	6	303	1.19284	369.159	CAGTTGAGCACATCATTTTGAGTATTAGCTGTTGTATTTCTAGACATTACATTTGGAATAAAAATTGAAT	0.285714	0.714286	0.682775	0.888352	0.205577	-9.4	0.616065
main_Lrrc47_chr4:154020185-154020255_18770	Mouse 3' UTR GCLiPP Peak	No	chr4:154020185-154020255	Lrrc47	190	7849	0.82164	6586.95	GATATGCTGTAGGTATCTGGGTGTGCTGTAGGTGTCTGTGTGGGTGTGGGTGTGCTGTGGGTGTCTGTGT	0.542857	0.457143	0	0	0	-12.6	0.579795
main_Ube2q1_chr3:89782690-89782760_16355	Mouse 3' UTR GCLiPP Peak	No	chr3:89782690-89782760	Ube2q1	2	95	1.09592	106.339	ATGTGTATGAAAAAATGTATCTTTGGGAAAACAATTACAGTTTGTTAATTTGAAGATGCTGGTCTTGACT	0.3	0.7	2.74648	2.74648	0	-11.1	0.425166
main_Arhgap19_chr19:41769840-41769910_13306	Mouse 3' UTR GCLiPP Peak	No	chr19:41769840-41769910	Arhgap19	23	1285	1.54138	2023.03	CCAGCCACACCTACTCAGTGTGCTTAGGTCGGTTGGTTTCTTCAAACAGGATATTTTGTGTTAATTGTTA	0.414286	0.585714	0.320479	0.765127	0.444648	-16.1	0.708121
main_Arpc5_chr1:152774512-152774582_1184	Mouse 3' UTR GCLiPP Peak	No	chr1:152774512-152774582	Arpc5	4	178	0.846443	153.888	GAAAATTTTGTCTCAGTGGGGATGTTTGACCCTTTCATAACCATGTCAATAATATGTATCACATTCTGTA	0.342857	0.657143	0.435549	0.666958	0.231408	-7.2	0.56826
main_Lrrc47_chr4:154019948-154020018_18766	Mouse 3' UTR GCLiPP Peak	No	chr4:154019948-154020018	Lrrc47	158	3899	0.808018	3217.83	TGTGGGTGTGCTATAGGTATCTGTGGGTGTGCTGTAGGTGTCTGTGTGGGTGTGCTGTAGGTGTCTGTGT	0.528571	0.471429	0.0229718	0.0927465	0.0697746	-12.7	0.56843
main_Pcbp2_chr15:102498712-102498782_9784	Mouse 3' UTR GCLiPP Peak	No	chr15:102498712-102498782	Pcbp2	4	106	1.30959	141.785	AGATATCCATATTTAGTTTTATAAGCTTCTCCCCCTTTTGTTTTTTGGTTTTTGTTTTTGTTTGGCTCAT	0.3	0.7	1.56734	1.69965	0.13231	-2.2	0.329266
main_Mesdc2_chr7:83898191-83898261_23055	Mouse 3' UTR GCLiPP Peak	No	chr7:83898191-83898261	Mesdc2	71	5120	1.37944	7213.74	GATTGGTAGTGGACTGGCAAGTCATGTCTACTGTGGCTTCACCTGACTTTGGAAACTTGATGTTTTGTAC	0.442857	0.557143	-0.0744648	0.381366	0.455831	-12	0.483557
main_2700094K13Rik_chr2:84669252-84669322_14498	Mouse 3' UTR GCLiPP Peak	No	chr2:84669252-84669322	2700094K13Rik	48	2055	1.20314	2525.33	TTTCTTCCTCACCAGAAGTGATGGTTCAGTTGTGAGGCAGCCCTCCAGCAAGACATTGTAAAAGTGTTTC	0.457143	0.542857	0.847127	1.03239	0.185268	-17.6	0.551228
main_Lrrc47_chr4:154019994-154020064_18767	Mouse 3' UTR GCLiPP Peak	No	chr4:154019994-154020064	Lrrc47	325	11495	0.779435	9151.18	TGGGTGTGCTGTAGGTGTCTGTGTAGGTGTGGGTGTGCTGTAGGTGTCTGTGTGGGTGTGCTAGGTGTCT	0.557143	0.442857	0	0	0	-5.7	0.568964
main_Tomm7_chr5:23839677-23839747_18941	Mouse 3' UTR GCLiPP Peak	No	chr5:23839677-23839747	Tomm7	16	671	1.51754	1040.04	AGAAAGGAGACGTCATTTCAACGATTCTGTGGCAGAGTGGAGGAGCCTATACTGATTTATGATAGACTAT	0.414286	0.585714	0.65731	0.917338	0.260028	-10	0.515954
main_Tor1aip2_chr1:156052737-156052807_1276	Mouse 3' UTR GCLiPP Peak	No	chr1:156052737-156052807	Tor1aip2	2	55	2.40082	134.869	CCTGTTATGAGAACATGTTCTTGTAGCTGGATTCTAGATTCTAATAAATTTTAATACACTACATTGTTCT	0.3	0.7	0.509493	0.788141	0.278648	-10.7	0.492772
main_Hnrnpa0_chr13:58127148-58127218_7332	Mouse 3' UTR GCLiPP Peak	No	chr13:58127148-58127218	Hnrnpa0	1	86	0.679123	59.6534	TTGATGGACTCTATTTTTTTATTATTACTTGGACCTTGGTCGTTTTTATACTAGCAAAAAAATGTCTTGT	0.285714	0.714286	2.12641	2.12641	0	-5.7	0.460669
main_Ppp1r7_chr1:93365197-93365267_695	Mouse 3' UTR GCLiPP Peak	No	chr1:93365197-93365267	Ppp1r7	59	2305	0.880595	2073.17	TGGCACCTGGCCTGTGATGCTACACACCATTTGGAGATGCCAACACTATTAAATCTTGCCACGCGGTCTT	0.5	0.5	-0.230592	0.753549	0.984141	-13	0.477647
cd8_Srsf3_chr17:29041444-29041514_5285	Mouse 3' UTR GCLiPP Peak	No	chr17:29041444-29041514	Srsf3	19	846	1.31869	1139.47	AACTTCATCTGACAGGAGTATGTACAGGAAATTAAAGTTTTGTTTGAGACTTCATAAGCTTGGTGCATTT	0.342857	0.657143	2.15079	2.15079	0	-14	0.387945
main_Prdx2_chr8:84974251-84974321_24547	Mouse 3' UTR GCLiPP Peak	No	chr8:84974251-84974321	Prdx2	5	172	1.37793	242.072	TGCCCTGAGCACACCTAGCTGGGCCCAGGTCTATAGGAAACCAATAAAGTATTAGGGACAGTGTAAGTCT	0.485714	0.514286	0.441507	0.845197	0.40369	-13.7	0.6858
main_Rpl5_chr5:107907986-107908056_19523	Mouse 3' UTR GCLiPP Peak	No	chr5:107907986-107908056	Rpl5	1	31	1.82941	57.9243	TGAAAGCTAAAGCAGTTTTCTATGAAGATTTTTTCATAAAGACAATAAACATATTGATCAAGCAGCTTTT	0.271429	0.728571	0.652577	1.18108	0.528507	-11.4	0.443503
main_Mrpl47_chr3:32727514-32727584_15987	Mouse 3' UTR GCLiPP Peak	No	chr3:32727514-32727584	Mrpl47	10	586	1.53544	919.008	CAGAAGTCTGGTTCCATTGTTCTTAAAGCCTGTGTCCTGACGTGAATACCTGTTAAGCAGTTTATAAAGA	0.4	0.6	0.15093	0.710986	0.560056	-8.3	0.519042
main_Hnrnpa0_chr13:58126951-58127021_7329	Mouse 3' UTR GCLiPP Peak	No	chr13:58126951-58127021	Hnrnpa0	16	478	3.45483	1686.72	ACAGCGTTTTCTATGAAACCTACTTGGATCCCATGCCTGGAATTTGGAAGCATATGTACAAAAATCATTT	0.371429	0.628571	2.08872	2.09004	0.00132394	-6.6	0.365224
main_1110001J03Rik_chr6:38539347-38539417_20741	Mouse 3' UTR GCLiPP Peak	No	chr6:38539347-38539417	1110001J03Rik	16	677	1.81541	1255.32	GGCTGGGAGCCGTGATGCAGAGAGTCCTCAGATGTTCCTTCATTCAAGAGTTTAACCATTTCTAACAATA	0.442857	0.557143	0.75438	1.04717	0.292789	-10.2	0.490836
main_Tmed7_chr18:46587389-46587459_12278	Mouse 3' UTR GCLiPP Peak	No	chr18:46587389-46587459	Tmed7	17	772	1.67425	1320.16	TTGGTTTGTATTGTTTGTGTCTTGTACCTTGTGTGGATTAAGCTGATTGAAATGAGATTTTGATCCAAGT	0.342857	0.657143	0.594282	0.80338	0.209099	-8.6	0.443249
rapidmain_Dut_chr2:125257605-125257675_14931	Mouse 3' UTR GCLiPP Peak	Yes	chr2:125257605-125257675	Dut	2	148	0.50901	76.9442	AGGGTACAGTTAGATTTTTTGTTGTTGTTGTATTATTTAAATTATAGCCTTCCAAAAACTGTTTTTGATC	0.271429	0.728571	-0.260352	0.781225	1.04158	-6.5	0.389371
main_Rpl23_chr11:97778018-97778088_5052	Mouse 3' UTR GCLiPP Peak	No	chr11:97778018-97778088	Rpl23	2	38	0.400947	15.5618	TGCATGATTCTCCAGTGTATTTGTAAAATATATTCATTAAAGTCTCTGCTCTGAGAGCTGGTCTTCTTGA	0.357143	0.642857	-0.0385775	0.857056	0.895634	-10.1	0.495319
main_Minos1_chr4:139103777-139103847_18418	Mouse 3' UTR GCLiPP Peak	No	chr4:139103777-139103847	Minos1	2	43	1.811	79.5379	TTGTATTATCTCTTTGGAAATTGTAAGGAGGTCTTAAATAAATTAAAAACGGGAAGCCCAATGCAAGCAA	0.328571	0.671429	1.25903	1.45573	0.196704	-12.3	0.659223
main_Psmb1_chr17:15475968-15476038_10669	Mouse 3' UTR GCLiPP Peak	No	chr17:15475968-15476038	Psmb1	9	252	0.994235	255.904	TCCCCTGCGGAAAGACTGACATGCGGGTCATATATTGGAGCTGTGGCACAAGTTTGTTTTATTAAAAAGA	0.428571	0.571429	0.41438	0.906493	0.492113	-11.2	0.479709
main_Zdhhc18_chr4:133607862-133607932_18201	Mouse 3' UTR GCLiPP Peak	No	chr4:133607862-133607932	Zdhhc18	5	121	2.33646	288.757	GCTGGTAATACTTGAAACGGGTTTATTAATGCTGGGTATTTTGCACAATTTTATAGTCTTCTTTTTTACA	0.314286	0.685714	1.93608	1.93834	0.00225352	-5.1	0.596402
main_Lrrc47_chr4:154020130-154020200_18769	Mouse 3' UTR GCLiPP Peak	No	chr4:154020130-154020200	Lrrc47	144	9680	1.82877	18081	AGGTATGCTGTAGGTATCTGGGTGTGGGTATGCTGTAGATGTCTGTGTAGGTGTGGATATGCTGTAGGTA	0.471429	0.528571	0	0	0	-10.6	0.574447
main_H3f3b_chr11:116023335-116023405_5646	Mouse 3' UTR GCLiPP Peak	No	chr11:116023335-116023405	H3f3b	1	13	0.130222	1.72908	TTGAAGCGGTTTTTATGGCATTTTGTAGTAAATTCTGTAAAATACTTTGGTTTAATTTGTGACTTTTTTT	0.257143	0.742857	1.96368	1.97342	0.00974648	-8.8	0.330721
main_Rpl21_chr5:146835932-146836002_20475	Mouse 3' UTR GCLiPP Peak	No	chr5:146835932-146836002	Rpl21	24	567	1.58689	919.008	CCATACGAATTCATGGCCTAATGTACACAAAGAAATAAAATACCAGCACCAGGACTGTGAAGTGTTTTCC	0.4	0.6	0.508634	0.959225	0.450592	-9.9	0.58414
main_Ppp1r7_chr1:93365713-93365783_696	Mouse 3' UTR GCLiPP Peak	No	chr1:93365713-93365783	Ppp1r7	28	918	0.711824	667.426	GGCCACTGGGCACTGGTCATGGCTCCTGTTCTCACCCACGTCCTCTGGCCTTATTTAGATGAAGTTTCTA	0.528571	0.471429	-0.214662	0.659197	0.873859	-19.9	0.633232
main_Cth_chr3:157894485-157894555_17065	Mouse 3' UTR GCLiPP Peak	No	chr3:157894485-157894555	Cth	6	209	1.87919	401.148	TTCTGTTTTGGGATCATGTTGTCTTTTTTCTTTCTTCAGTAGCTTATGATATATTTTAATCATGTTTACA	0.271429	0.728571	0.596169	0.809915	0.213746	-6.3	0.325952
main_Esd_chr14:74749779-74749849_8302	Mouse 3' UTR GCLiPP Peak	No	chr14:74749779-74749849	Esd	7	179	1.09707	200.574	GCTGACTTCCTCGCAGAAGATCATGCTCCTGCAGCTGAATCGCTTTTCTGAATAAATATATCAAACTTTC	0.414286	0.585714	0.461901	0.769225	0.307324	-8.4	0.887881
main_Mllt6_chr11:97682962-97683032_5009	Mouse 3' UTR GCLiPP Peak	No	chr11:97682962-97683032	Mllt6	171	10709	1.57836	17264	TTCCAGTTTCCCTTGCTCATGTCTGTGGGTCTCTGCATGTGTGCATTTTGGTGTGTTTACGTTTGAGTTT	0.442857	0.557143	0.851831	1.21814	0.36631	-12.5	0.618753
main_Nop10_chr2:112262602-112262672_14767	Mouse 3' UTR GCLiPP Peak	No	chr2:112262602-112262672	Nop10	11	299	2.14866	656.187	AAAAGGAACAATATTTTTCTTTCTTTTTTTCATGCCAGGTTATTAAAGATATAGTGAACTGAAAGTTCAT	0.257143	0.742857	0.575183	0.870282	0.295099	-7.6	0.694118
main_Rplp2_chr7:141451285-141451355_23739	Mouse 3' UTR GCLiPP Peak	No	chr7:141451285-141451355	Rplp2	35	1023	0.891951	931.976	TGGGATTTGGCTTGTTTGATTAAATTCCTGCTCCCCTGCAAATAAAGTCTTTTTATGTATCTTGAGTGGC	0.385714	0.614286	0.654944	1.13368	0.478732	-10.7	0.711705
main_Rab5c_chr11:100715833-100715903_5206	Mouse 3' UTR GCLiPP Peak	No	chr11:100715833-100715903	Rab5c	10	337	1.42665	491.06	AGGCCGGAGGGAGTTATTCCACCTGCACCTTTCTGTACAAATACTAATTCAATTTTAAGTCTTAAGTCAC	0.4	0.6	1.86248	1.86527	0.00278873	-8.4	0.489757
main_Ndufa6_chr15:82350196-82350266_9331	Mouse 3' UTR GCLiPP Peak	No	chr15:82350196-82350266	Ndufa6	26	870	1.64813	1464.53	AAGTTCTATATGGGCCATGACCCATGAGGTCACCTGATGGGAAGGTGCATGTTAATATTTAACTAGAGTA	0.414286	0.585714	1.03661	1.35044	0.313831	-20.3	0.480843
main_Scd2_chr19:44303423-44303493_13347	Mouse 3' UTR GCLiPP Peak	No	chr19:44303423-44303493	Scd2	36	865	0.781859	690.769	GCTTTGTCCCTGATGACCTCGTTTCTCATTGCTTCTCCCAAGCCAGCCGCCGCTCAGCTATAGGTCAGTG	0.557143	0.442857	0.221746	0.680789	0.459042	-9.1	0.508413
main_Zmat3_chr3:32339676-32339746_15966	Mouse 3' UTR GCLiPP Peak	No	chr3:32339676-32339746	Zmat3	5	272	0.715743	198.845	CTCATTTTGCTGCAAAATATAATTCTTCGTTAGACTTAAATATACTGCTGGCCACTTGGTTCTGTGATTG	0.357143	0.642857	1.22134	1.26562	0.0442817	-7.8	0.659557
main_Pycard_chr7:127992655-127992725_23618	Mouse 3' UTR GCLiPP Peak	No	chr7:127992655-127992725	Pycard	32	1139	1.48555	1728.22	TGGAGCAGAGCTGAGGTATCTTTTCCAGCTACATTATCTAGCTCCTGACTTTGTATACACAATTTTTGAA	0.385714	0.614286	0.0980563	0.811549	0.713493	-13.9	0.56018
main_Pla2g12a_chr3:129895228-129895298_16891	Mouse 3' UTR GCLiPP Peak	No	chr3:129895228-129895298	Pla2g12a	1	15	16.1389	247.259	CTTAAGCCCGTGTGACTTGGTGTTCATAGTTGTACTTAACAATAAAAATGAAAGCAAATGTAAAATTCAT	0.314286	0.685714	0.0615352	0.735451	0.673915	-4.8	0.542256
main_Sec61g_chr11:16501654-16501724_3421	Mouse 3' UTR GCLiPP Peak	No	chr11:16501654-16501724	Sec61g	2	24	1.26967	31.1235	GTGGTGTTTTGTTTCTTCCTCCTTCCTATGAGGTTTTCTACTTCTCAATTAAAATAATTTCAAAATAAAC	0.3	0.7	0.620423	0.910592	0.290169	-4.7	0.399718
main_Polr2c_chr8:94863788-94863858_24667	Mouse 3' UTR GCLiPP Peak	No	chr8:94863788-94863858	Polr2c	17	514	0.568138	298.267	GGTTTTCAGGCAGCATGGGGGGAAACACACACCAGCACGGAAAAGAAGGAATATTTATTGATCAACAGTA	0.442857	0.557143	0.736155	0.906155	0.17	-6.5	0.420028
main_Cacybp_chr1:160203457-160203527_1283	Mouse 3' UTR GCLiPP Peak	No	chr1:160203457-160203527	Cacybp	55	3595	2.0536	7540.54	CTCGTGTTCCAGTAAGGGGATGTTGTTGAACTGCACATATTTGTTCATGTGGGTATGTAGTTTTGACAGA	0.414286	0.585714	0.479986	0.720099	0.240113	-14.5	0.367612
main_Fam104a_chr11:113662936-113663006_5555	Mouse 3' UTR GCLiPP Peak	No	chr11:113662936-113663006	Fam104a	42	1975	1.48674	2999.1	GATTTCCACATCTGTCAACTAGATGCTGTACTGTATGTAAAGAGCCTCTTAAAAATGCGGGATCTTAATT	0.371429	0.628571	1.01903	1.09086	0.071831	-10.9	0.647917
main_Dynll1_chr5:115298431-115298501_19693	Mouse 3' UTR GCLiPP Peak	No	chr5:115298431-115298501	Dynll1	1	23	1.03045	24.2072	ATTTTCTAGTCCATACTTCTGTACCCCCATTTTTTTCTCCCTTAGGTCATTCCTTTAAAAATAAATCTGT	0.328571	0.671429	1.51134	1.51739	0.00605634	-1.4	0.524553
main_Ndufs4_chr13:114288645-114288715_7614	Mouse 3' UTR GCLiPP Peak	No	chr13:114288645-114288715	Ndufs4	1	25	0.440151	11.239	GTGCACTATTTATAGTCCATGGATAATGCACCTCTTAATCTCCTAATAAATGTGACCTTTAAACTACAGG	0.357143	0.642857	1.45379	1.49083	0.0370423	-9.6	0.594681
main_Cox14_chr15:99727986-99728056_9668	Mouse 3' UTR GCLiPP Peak	No	chr15:99727986-99728056	Cox14	3	110	0.769494	86.4542	CATCAAGTAAATGGGAATGTGAGGGTGAGGTTTATTACAGAGATTAAATATTTTGCTTTGTTTGTGTTTT	0.314286	0.685714	0.544676	0.92907	0.384394	-6.7	0.626181
main_Reep5_chr18:34346985-34347055_12050	Mouse 3' UTR GCLiPP Peak	No	chr18:34346985-34347055	Reep5	27	1064	2.35954	2564.23	CACAGTCGTTGGATAATGTTGCCTTGGAAACTTCCCGCTGTATTAAAAATGGAATGTGTTGTAAGCTGCT	0.414286	0.585714	0.682028	0.865042	0.183014	-11.2	0.686928
main_Rpl22_chr4:152332431-152332501_18740	Mouse 3' UTR GCLiPP Peak	No	chr4:152332431-152332501	Rpl22	1	30	0.931088	28.5299	TGGTCTGCAATGTTTTGTATTAATTCATAAATAAAATTTAGGAACAAAACCGGTGGTTTATCCTTGCATC	0.314286	0.685714	1.14523	1.23804	0.0928169	-8.4	0.411168
cd8_Calm3_chr7:16916860-16916930_10968	Mouse 3' UTR GCLiPP Peak	No	chr7:16916860-16916930	Calm3	74	2480	0.599678	1519	CATGCCCGTTCTCCTGATCTCTTCTCGCGCTCTCCTCTCTTCAACACTCCCCTGCGTACCCGGTTCTAGC	0.585714	0.414286	1.48689	1.58914	0.102254	-3.6	0.625025
main_Syce2_chr8:84887329-84887399_24543	Mouse 3' UTR GCLiPP Peak	No	chr8:84887329-84887399	Syce2	16	383	2.85316	1116.12	GCCATAAGCCTTGCCTTAGCAAATTCTCCCAACCCACATCTGTAGTTGATTAAATGTTTTGATTTCACCC	0.414286	0.585714	0.287169	0.711986	0.424817	-4.1	0.663697
main_Pet100_chr8:3623290-3623360_23814	Mouse 3' UTR GCLiPP Peak	No	chr8:3623290-3623360	Pet100	16	489	0.501981	250.717	CCCAGCAGAGCTCCTGAGACCTTCAGTTCCTCAAGTCCCAGCTCCCTTCCCCACCACAGAAAATAACACA	0.542857	0.457143	0.385535	0.828859	0.443324	-7.2	0.616986
main_Pin1_chr9:20663633-20663703_25308	Mouse 3' UTR GCLiPP Peak	No	chr9:20663633-20663703	Pin1	30	1131	0.664582	767.713	TCAGCCTCAGGGTGCAGTGCAGCACCCTACGCACCTTCCATTAAATCTGGAACCACTGGTTGGTGGTCCT	0.557143	0.442857	0.319169	0.922972	0.603803	-23.8	0.687089
main_Mrps21_chr3:95862694-95862764_16573	Mouse 3' UTR GCLiPP Peak	No	chr3:95862694-95862764	Mrps21	25	664	0.442343	299.996	GCTGGGCTGCTGAGGCTTGGGGCTAGGCACCCACACACCCATGTCCAACTCCTTTCTTTATCCAGCCAAG	0.585714	0.414286	0.280183	0.647254	0.36707	-18.1	0.491349
main_Ptma_chr1:86530214-86530284_593	Mouse 3' UTR GCLiPP Peak	No	chr1:86530214-86530284	Ptma	1	22	1.15424	25.9363	ACCAGAACTTCCCAGGCCCTACTTTTTTTCTTAAAAATACTTTAAAAGGAAAATTTGTTTGTATTTTTTA	0.271429	0.728571	1.62807	1.63213	0.00405634	-4.5	0.445254
main_Slc7a5_chr8:121882675-121882745_25117	Mouse 3' UTR GCLiPP Peak	No	chr8:121882675-121882745	Slc7a5	7	253	0.946812	244.665	CCCCTGTGATTTTTGTTTTGTTTTGGTTTTTGTAGCGTGCATTTGGGTCAAGTTTACACTAGCGAGATGA	0.4	0.6	0.113873	0.643817	0.529944	-8.7	0.467881
main_Pdap1_chr5:145129666-145129736_20446	Mouse 3' UTR GCLiPP Peak	No	chr5:145129666-145129736	Pdap1	25	955	1.85686	1811.22	TCTGGTTACCATGCGTCACCCAGACAAGACATGCTCCTCAAATTCAACTTGTATATTTGGCAGATTAAAC	0.414286	0.585714	1.27418	1.32148	0.0472958	-5.9	0.543523
main_2310011J03Rik_chr10:80318711-80318781_2385	Mouse 3' UTR GCLiPP Peak	No	chr10:80318711-80318781	2310011J03Rik	23	855	0.700915	612.096	TCTTGCAGAAGACCCACCACTCTTGGGGTGGCTGGACTTTAGTTCTGGAAGATTAAAGATGTTTGATGCC	0.471429	0.528571	-0.00885915	0.45069	0.459549	-19.8	0.591511
main_Arpp19_chr9:75056779-75056849_26123	Mouse 3' UTR GCLiPP Peak	No	chr9:75056779-75056849	Arpp19	34	1208	0.808606	997.682	TGGTTGCTAGCAAGCTGGCTGGCTGATTAAAGAGCTGAACTGCATGAGTCCTCTACTGTCCTTTATTTCT	0.457143	0.542857	1.40668	1.44315	0.0364789	-14.2	0.691659
main_Lsm8_chr6:18853721-18853791_20605	Mouse 3' UTR GCLiPP Peak	No	chr6:18853721-18853791	Lsm8	92	2781	1.21412	3448.66	TCCTGTACAGAAGCGTCTGTCCTGAGAGTGATGTTTAGGGTTTTTATGAGTGTGTAATTGTGCAGTTTGA	0.414286	0.585714	1.00094	1.14018	0.139239	-13.2	0.509345
main_Senp3_chr11:69673399-69673469_4254	Mouse 3' UTR GCLiPP Peak	No	chr11:69673399-69673469	Senp3	1	16	1.32257	21.6136	CAAGAAACTCTAGTTCCTTTTTGTTTCTCTACCCAATTCCCTTTGGATTTTCATATTTAAATGTTTGGTT	0.314286	0.685714	1.41525	1.55069	0.135437	-8.2	0.472155
main_Pip4k2b_chr11:97716782-97716852_5046	Mouse 3' UTR GCLiPP Peak	No	chr11:97716782-97716852	Pip4k2b	25	945	1.78425	1722.17	TCCTGACAGTATTGTTGAGTGGGTCAAAATATTCAAGCTGTGGTTTGGTGGATTTTAGGTTTGTTGTTTT	0.371429	0.628571	1.02627	1.20531	0.179042	-9.8	0.487909
main_Cggbp1_chr16:64856887-64856957_10485	Mouse 3' UTR GCLiPP Peak	No	chr16:64856887-64856957	Cggbp1	3	169	0.906546	156.482	GTTCTGTTTTCTCTTTTTACAGGGAATTGGTTACTTTTTGGCTGACAACAAATAAGAAAATTGCTTTCTA	0.314286	0.685714	0.616859	0.799113	0.182254	-7.3	0.609704
main_Rab8a_chr8:72180763-72180833_24373	Mouse 3' UTR GCLiPP Peak	No	chr8:72180763-72180833	Rab8a	1	15	0.395007	6.05179	CCCAATCTTCTCTGGCTGGCTCTAATCGGATGTTCATTTTCTATCTAAGATGATTTTTTTATTTTTCCAG	0.357143	0.642857	0.240803	0.826183	0.58538	-8.7	0.530145
main_Bcat1_chr6:144999895-144999965_22063	Mouse 3' UTR GCLiPP Peak	No	chr6:144999895-144999965	Bcat1	73	2988	0.922079	2814.08	CGGCCTCCCTGTGACTCATGGGCACTCTCAGAGCAGGACACTTTGTTTCTTTTGCTGGTGAGGTTCTTTT	0.514286	0.485714	-0.0350563	0.54407	0.579127	-15.3	0.538625
main_Srsf7_chr17:80201303-80201373_11799	Mouse 3' UTR GCLiPP Peak	No	chr17:80201303-80201373	Srsf7	3	90	0.479651	44.0916	CATCTTATGGTCTGAAAATGTGGGTTTTTATTTGACACGTTTAAATAAAATGTTTCTAACTAGATGTTTT	0.271429	0.728571	2.14504	2.14504	0	-10.1	0.44035
th2_Cdkn1a_chr17:29099405-29099475_5734	Mouse 3' UTR GCLiPP Peak	No	chr17:29099405-29099475	Cdkn1a	70	1971	0.38135	767.713	AGCCCCGCCCTCTTCTGCTGTGGGTCAGGAGGCCTCTTCCCCATCTTCGGCCTTAGCCCTCACTCTGTGT	0.628571	0.371429	NA	NA	NA	-15.8	0.7148
main_Grb2_chr11:115645146-115645216_5618	Mouse 3' UTR GCLiPP Peak	No	chr11:115645146-115645216	Grb2	82	3973	0.697948	2832.24	TCCTGAGAGTCAGACTGCAGGCCCTCCCCTCTCCCACTGCTTCCCTTCAGGTGTTTTGACGTTTTTTTGT	0.528571	0.471429	-0.116099	0.725563	0.841662	-10.8	0.515013
main_Gabarapl2_chr8:111952833-111952903_24957	Mouse 3' UTR GCLiPP Peak	No	chr8:111952833-111952903	Gabarapl2	2	167	1.55604	265.414	TCATGTTGGACTGAGCTAATCTATTCTTCTTTCTGAGACTATTAAGGTAAATAATTAACAATAAAGCCTC	0.314286	0.685714	1.97659	1.98293	0.00633803	-3.4	0.413281
main_Rpl11_chr4:136049936-136050006_18330	Mouse 3' UTR GCLiPP Peak	No	chr4:136049936-136050006	Rpl11	6	205	0.454189	95.0996	TCATCCTTCCTGGAAAATAAACTTGATCCAAAAAGCTAATAAAATTTTCTCAGAAATGCATGTTACAGTT	0.3	0.7	1.39259	1.55961	0.167014	-4.4	0.645084
main_Eif1_chr11:100321981-100322051_5173	Mouse 3' UTR GCLiPP Peak	No	chr11:100321981-100322051	Eif1	37	1741	1.13135	2011.79	CGAGCCAGTGCCATGTGAAGGAACAAGCTGGTCTTTTGGTTTTCTTTCCCCCTCCAGTTTCAATGTTATG	0.471429	0.528571	0.961282	1.07835	0.11707	-10.9	0.54583
main_Eri1_chr8:35468607-35468677_24088	Mouse 3' UTR GCLiPP Peak	No	chr8:35468607-35468677	Eri1	22	1200	1.21182	1485.28	TAGGTGAAGTGAGGGCTTTGTCCCAAGAAGGCTGTGTGGGTACCAGATTCTGCAAGTGTTGAAGTTCTAT	0.471429	0.528571	-0.0196761	0.598408	0.618085	-13.3	0.582234
main_Ddx6_chr9:44636904-44636974_25613	Mouse 3' UTR GCLiPP Peak	No	chr9:44636904-44636974	Ddx6	15	556	1.92429	1092.78	TTATTACTTATTTGTGCGAAGTGCCTTATGCTACAAGACCATTAAGAATATCATCTTTACACACAGCCCA	0.357143	0.642857	2.08725	2.08725	0	-5.5	0.558516
main_Snrpb2_chr2:143071536-143071606_15079	Mouse 3' UTR GCLiPP Peak	No	chr2:143071536-143071606	Snrpb2	15	605	2.71422	1677.21	CACCTATGCCAAGAAGTAACATGTGATGCCAATGTGGAAGGACTTGGTTATTTATAGTGTTTGTTTTGAT	0.371429	0.628571	1.02885	1.2173	0.188451	-11.6	0.392523
main_Ykt6_chr11:5966153-5966223_3311	Mouse 3' UTR GCLiPP Peak	No	chr11:5966153-5966223	Ykt6	25	1193	1.52686	1860.49	AGTTCCCAAGAGGAATGGAGGGATGCTTTAAGGGTGGGAACATTGATGTTCGTATGTGTGGTTGTGACTT	0.457143	0.542857	0.232944	0.656183	0.423239	-12.7	0.485486
main_Ube2r2_chr4:41191554-41191624_17262	Mouse 3' UTR GCLiPP Peak	No	chr4:41191554-41191624	Ube2r2	1	81	0.700145	57.9243	TTGTTTTTTGGAATTGATTGGGATCTGAAAGCCTGAAATAAATATTCATACTTTACATAGAACCGAGCAC	0.328571	0.671429	2.07645	2.10208	0.0256338	-8.4	0.612274
main_Gal3st1_chr11:4002500-4002570_3201	Mouse 3' UTR GCLiPP Peak	No	chr11:4002500-4002570	Gal3st1	7	200	2.08648	426.219	TGAAATCAACTTTCCAGCAGAGTATCCATTCAAACCACCCAAGATCACATTTAAAACAAAGATCTACCAC	0.371429	0.628571	0	0	0	-5	0.382458
main_Calm1_chr12:100206403-100206473_6470	Mouse 3' UTR GCLiPP Peak	No	chr12:100206403-100206473	Calm1	9	251	1.78394	457.343	CGTACAGATGATGACTGCAAAATGAAGACCTACTTTCAACTACTTTTCCCCCTCTAGAAGAATCAAATTG	0.385714	0.614286	1.99441	2.01849	0.0240845	-3	0.393894
main_Tmsb4x_chrX:167207428-167207498_27337	Mouse 3' UTR GCLiPP Peak	No	chrX:167207428-167207498	Tmsb4x	63	2064	1.21266	2556.45	AGGCGAGCGCCGCCAATATGCACTGTACATTCCACGAGCATTGCCTTCTTATTTTACTTCTTTTAGCTGT	0.457143	0.542857	2.03628	2.10172	0.0654366	-9.7	0.432733
main_Lsm12_chr11:102163717-102163787_5335	Mouse 3' UTR GCLiPP Peak	No	chr11:102163717-102163787	Lsm12	68	4326	0.955233	4220.69	TCACTCTGCCCTCCTCCACCTGTGACTTTCCTTCCCTAGTCTGTGTCTGCCATCCTGATTTTATAAGTGG	0.5	0.5	1.05676	1.10068	0.0439155	-5.4	0.528454
main_Paxip1_chr5:27742119-27742189_18972	Mouse 3' UTR GCLiPP Peak	No	chr5:27742119-27742189	Paxip1	7	277	2.72879	772.036	ATGATGTAAATAAGACTTTGCTGTCTAAATTATGGCTGTTAAAGATATGAAATGTTTTGTACTTTGATTA	0.257143	0.742857	1.49935	1.54276	0.0434085	-9.6	0.389492
main_Mapk1ip1l_chr14:47320050-47320120_7951	Mouse 3' UTR GCLiPP Peak	No	chr14:47320050-47320120	Mapk1ip1l	45	2968	1.03011	3122.73	GAGCTCTAGAGGAATGCTGGCACTACATGCACCTGGAGTTTTAAGTTTTCCTGTGGTAGTCAGACTGCCC	0.5	0.5	0.0210563	0.0775634	0.056507	-18.5	0.706687
main_Tmem167_chr13:90104529-90104599_7462	Mouse 3' UTR GCLiPP Peak	No	chr13:90104529-90104599	Tmem167	2	31	2.9762	94.2351	ATTTGTCTCTGAACATGGAATGAGATAAACTTCAAGATGCTGTTCTCTATTTTTATGCTATTGGACCAAT	0.328571	0.671429	1.321	1.33911	0.0181127	-10.3	0.437688
main_Ywhaq_chr12:21390337-21390407_6029	Mouse 3' UTR GCLiPP Peak	No	chr12:21390337-21390407	Ywhaq	3	70	1.86218	133.139	CCAAAAAAGCCTCGTGGAAATGTTATGCCCTATGTAACAGCAGAGTAACATAAAAATAAAACTACATTTT	0.328571	0.671429	1.62634	1.64011	0.0137746	-6.3	0.407367
main_Lsm8_chr6:18853765-18853835_20606	Mouse 3' UTR GCLiPP Peak	No	chr6:18853765-18853835	Lsm8	34	1029	1.86316	1958.19	TATGAGTGTGTAATTGTGCAGTTTGACTTCATGTTGGTACACTGTAATATGTAATTTAAATATTTCTACA	0.285714	0.714286	1.14162	1.25452	0.112901	-7.8	0.456216
main_Gatad1_chr5:3641278-3641348_18907	Mouse 3' UTR GCLiPP Peak	No	chr5:3641278-3641348	Gatad1	4	108	0.830769	91.6415	AAGCCTCAGTTTTAACCCTAGAACACACACATCCCAAAATAAAGCCAGGTTTCCAGTTTCCTTCTATTTA	0.385714	0.614286	-0.209	0.638099	0.847099	-5.1	0.552512
main_Ppp2r1a_chr17:20965777-20965847_10705	Mouse 3' UTR GCLiPP Peak	No	chr17:20965777-20965847	Ppp2r1a	50	2900	1.3222	3916.38	GGGACCCCTCCCCCATCTACTTACCACCACCCTTTCCCAACCCCAACCATGTTTTTTGTGTGTCAATTGT	0.514286	0.485714	0.419056	0.715056	0.296	-4.8	0.509735
main_Arpc1b_chr5:145128122-145128192_20445	Mouse 3' UTR GCLiPP Peak	No	chr5:145128122-145128192	Arpc1b	21	1016	1.00723	1045.23	CCCAAAGCACAATGCTGGTCATGAACTGCTTCAAAATGTGGGCTAATAAACATACCAAATGTGAGCCGGG	0.457143	0.542857	0.920944	1.11618	0.195239	-11.9	0.609518
main_Chtop_chr3:90499689-90499759_16446	Mouse 3' UTR GCLiPP Peak	No	chr3:90499689-90499759	Chtop	11	372	1.81803	690.769	TTGGTGCATTTAGTCTGTTCTGTCTACTTTTTGATACTGTGTTATATGAAACCCTATTTTCCTTTAAATT	0.3	0.7	1.31087	1.3162	0.00532394	-5	0.46186
main_Ppp1cb_chr5:32492389-32492459_19077	Mouse 3' UTR GCLiPP Peak	No	chr5:32492389-32492459	Ppp1cb	7	265	2.21034	598.263	AACTAAGAGCATACACAGACTTATGATTCTTTGGATGTGACACTTATTGGATGTGATTCTAAAGTCTTTT	0.328571	0.671429	0.842211	0.868493	0.0262817	-9.6	0.2965
main_Map2k2_chr10:81123834-81123904_2515	Mouse 3' UTR GCLiPP Peak	No	chr10:81123834-81123904	Map2k2	1	21	1.2092	25.9363	ATTTGAAAACCAAACAAAATGAAGAAAGAGAAAGAAAGAAAGAAAGCTAGCTGCGGCTGTGCTCCTGCCC	0.414286	0.585714	0.169958	0.470915	0.300958	-7.7	0.504918
main_Anapc11_chr11:120605595-120605665_5887	Mouse 3' UTR GCLiPP Peak	No	chr11:120605595-120605665	Anapc11	14	771	1.76315	1388.45	TTGAAAGGAGCTTTGCTGACTGTTTTGTTTTCCCATCACATTGACACTTTATTCAATAAGTAAAACTCAT	0.328571	0.671429	0.335746	0.78831	0.452563	-7.8	0.455395
main_Arf6_chr12:69374553-69374623_6198	Mouse 3' UTR GCLiPP Peak	No	chr12:69374553-69374623	Arf6	69	3999	0.831839	3397.65	GGAAGGAAATGTGCTGAATGAATGGCTTAGATGTGGATGACAAAGGGGAAGTAGGCTGGACGGGAAGAAC	0.485714	0.514286	1.31018	1.36308	0.0529014	-5.1	0.594902
main_Arpc5_chr1:152775477-152775547_1198	Mouse 3' UTR GCLiPP Peak	No	chr1:152775477-152775547	Arpc5	1	17	5.07866	88.1833	AGAAACTCTATAAACTGCTGTTTTTGATACCTGCTCTTTTTGTTTTGTTCTGTTTTGTAAAATTATGATA	0.271429	0.728571	1.30707	1.34456	0.037493	-2.5	0.383756
main_Nek2_chr1:191831449-191831519_1698	Mouse 3' UTR GCLiPP Peak	No	chr1:191831449-191831519	Nek2	67	2537	0.569856	1476.64	GGGCGGGAACCTTTGTGTGTGGTGAGCTCGTGGCATTGCTTGTGGTCTGCAAATGGATGTGTGTGTCTGC	0.557143	0.442857	-0.068662	0.532465	0.601127	-13.2	0.527742
main_Rps27l_chr9:66949386-66949456_26061	Mouse 3' UTR GCLiPP Peak	No	chr9:66949386-66949456	Rps27l	5	131	1.53135	204.896	TTCACAGAAAGCCTTACCAACTTCAGTTACTTTACCAAGACAATGTAATTATTGTTTGATTTTATAAAGT	0.285714	0.714286	1.12499	1.20237	0.0773803	-6.4	0.353023
main_Vasp_chr7:19257355-19257425_22319	Mouse 3' UTR GCLiPP Peak	No	chr7:19257355-19257425	Vasp	9	298	1.46281	445.239	GGAAGGAGGGGTCTCACCTTCTCTTGTTCTGGATTCACTTTAACGCTTTAATGCCTTGGAATTTTTTTTT	0.4	0.6	1.68339	1.71652	0.0331268	-13.4	0.546069
main_Txnrd1_chr10:82896350-82896420_2643	Mouse 3' UTR GCLiPP Peak	No	chr10:82896350-82896420	Txnrd1	38	1200	1.3395	1641.77	AGCTCAACCTTTTCCTGTAGATTGTCTTAGTCTCACTTTCAAGCTGTCTAATGTCAATTCTGTTTTTCTT	0.357143	0.642857	-0.113535	0.580324	0.693859	-5	0.507721
main_Cenpa_chr5:30674276-30674346_19012	Mouse 3' UTR GCLiPP Peak	No	chr5:30674276-30674346	Cenpa	29	1394	2.07968	2961.06	CCCGATACCTGCCATGGTATGGTTATTTCACTCTTACTGCTCTGTTTGCATCTTTTACTATTAGTTTTTG	0.385714	0.614286	0.225803	0.612	0.386197	-9.1	0.44642
main_Ddx6_chr9:44637386-44637456_25616	Mouse 3' UTR GCLiPP Peak	No	chr9:44637386-44637456	Ddx6	4	103	1.99695	210.084	TTCCTCTGTGGCAAAGCGTGACCCGTAGAAAATTGGATGTGTATACTTGTATAAACTTTGTAAATAAGTT	0.357143	0.642857	2.14573	2.14807	0.00233803	-5.8	0.563657
main_2410015M20Rik_chr17:56607619-56607689_11625	Mouse 3' UTR GCLiPP Peak	No	chr17:56607619-56607689	2410015M20Rik	34	1111	0.612548	695.092	CCCAGTGGGGACCTCACTCTGAGGGCAGCTTCCAGCATTGCTGGCCCAATAAAGGACTTGGGAATGGTCC	0.585714	0.414286	0.717042	1.22952	0.512479	-20.8	0.580053
main_Atp6v1g1_chr4:63550310-63550380_17476	Mouse 3' UTR GCLiPP Peak	No	chr4:63550310-63550380	Atp6v1g1	51	2444	2.1123	5272.84	CTTATCTTGTGTGTCTTTAAGGAGTGTATGTCGCCTGTTTTCCTGTGTCTTCATGCAAGTAATCGATATC	0.4	0.6	0.555817	0.748127	0.19231	-11.9	0.508139
rapidmain_Mt2_chr8:94173412-94173482_24632	Mouse 3' UTR GCLiPP Peak	Yes	chr8:94173412-94173482	Mt2	37	1265	0.815664	1053.88	AGCTGCTGTGCCTGAAGGGGGGCGGAGGGGTCCCCACATCTGTGTAAATAGACCATGTAGAAGCCTAGCC	0.585714	0.414286	0.16607	1.24483	1.07876	-20.6	0.426874
main_Eif3j2_chr2:122052097-122052167_14908	Mouse 3' UTR GCLiPP Peak	No	chr2:122052097-122052167	Eif3j2	126	5991	1.9862	12153.7	ACACTTTACCTTCTGCTGTCTTCTTTCTTTGCCCACAATCCCTTCAACATGTAGCACAACCTCCTTTCCT	0.442857	0.557143	1.48906	1.49477	0.00571831	-2.7	0.460811
main_Actr10_chr12:70962192-70962262_6210	Mouse 3' UTR GCLiPP Peak	No	chr12:70962192-70962262	Actr10	11	431	2.46863	1086.73	AATTCATCTGACTTTGTCTCTTGTGTCGTATGTCGTAGTGGATGCTTGTGAGATATGTTGTATTTATATC	0.357143	0.642857	0.68093	0.751577	0.0706479	-11.1	0.721227
main_Rab11b_chr17:33747141-33747211_11117	Mouse 3' UTR GCLiPP Peak	No	chr17:33747141-33747211	Rab11b	69	3258	0.680688	2265.1	AGGATAGGGAGGTTGGTAGGATGGACAAGGCCAGCCAGAGGTGAGGAAGATGAGTGGAAGGAACCTGCTT	0.542857	0.457143	0.115042	0.712648	0.597606	-12.8	0.478989
rapidmain_Lsm7_chr10:80852875-80852945_2491	Mouse 3' UTR GCLiPP Peak	Yes	chr10:80852875-80852945	Lsm7	87	3035	1.46196	4531.93	GCGGTCCAGCCCCAGGGATCTTCCTTCTATGGGGTGAACTTCTGTGTGATGTTTTGGTCTTTTGTTCTTG	0.5	0.5	-0.358944	0.693028	1.05197	-16.8	0.5098
main_Sec61g_chr11:16501714-16501784_3422	Mouse 3' UTR GCLiPP Peak	No	chr11:16501714-16501784	Sec61g	116	5214	0.73313	3904.27	TGGGACGAGTGAGCCAGAGCGGGGGAAAGGGCATGAAGTAAAGCGTTGCCTGAATGCTGTGTGGTGTTTT	0.542857	0.457143	0.375211	0.714254	0.339042	-16.3	0.413762
main_Cox19_chr5:139337834-139337904_20315	Mouse 3' UTR GCLiPP Peak	No	chr5:139337834-139337904	Cox19	44	2874	1.29971	3815.22	GTGCTCACAGACTCATATCAGCTGGCTTCCCTTTCTCTGTGTTCTCTCCTGTGAACAAAGCTGGAATACA	0.471429	0.528571	-0.12238	0.532606	0.654986	-9.8	0.559015
main_Tomm6_chr17:47686776-47686846_11500	Mouse 3' UTR GCLiPP Peak	No	chr17:47686776-47686846	Tomm6	101	5377	1.02811	5646.32	GGTTCTGTGTGCAGTTCCCAACTTTCTGCAGAAGATGGTCCTTGCCCTTGTCCTGAAGAGTAGTAATGGT	0.485714	0.514286	0.540141	0.732507	0.192366	-12.8	0.495498
main_D17Wsu92e_chr17:27753636-27753706_10917	Mouse 3' UTR GCLiPP Peak	No	chr17:27753636-27753706	D17Wsu92e	6	180	2.2854	420.167	GTGATGACGTCAGTCTAATGAGTTGTTAGGTCACTTGGGAAGGGGAAGAAATTTAAATGGGGGAAAATAA	0.4	0.6	0.661859	0.895746	0.233887	-6.9	0.578127
main_Dynll2_chr11:87980975-87981045_4773	Mouse 3' UTR GCLiPP Peak	No	chr11:87980975-87981045	Dynll2	59	1867	0.526364	1003.73	TTGGGTGGTGGGTGCTGCTGTAGGAGGCCGGGGAGGCTGTGAGGACAGGGTTAGGATTGGCAAGGAGAGG	0.628571	0.371429	0.705197	0.809817	0.10462	-15.8	0.534068
main_Ppp1cb_chr5:32492196-32492266_19075	Mouse 3' UTR GCLiPP Peak	No	chr5:32492196-32492266	Ppp1cb	17	699	2.44851	1748.1	TGCGTTTTCATAATCAAAGGTCATGATGTGTATAGACATGCTTTGTAGTGAAGTATAGTAGCAATAATTT	0.314286	0.685714	2.02252	2.03401	0.011493	-8.9	0.339835
main_Rpl15_chr14:18268957-18269027_7668	Mouse 3' UTR GCLiPP Peak	No	chr14:18268957-18269027	Rpl15	12	373	2.26248	861.948	TCCACCGTTACCGCTAATACACGTGATATTTGTAAAATTCATATCCAATAAACAATTTAGGACAGTCATT	0.328571	0.671429	1.24765	1.38531	0.137662	-3.4	0.566967
main_Rbpj_chr5:53653809-53653879_19215	Mouse 3' UTR GCLiPP Peak	No	chr5:53653809-53653879	Rbpj	77	3709	0.797149	3019.85	CAGGCTGATGGAAATCCAGGTTTTCAGCTGTCCCTCTCACACGCACCCCTTTTTGGTTGTTTTGGTTTGG	0.5	0.5	0.38007	0.739704	0.359634	-11.2	0.540787
main_Arpc5_chr1:152774396-152774466_1183	Mouse 3' UTR GCLiPP Peak	No	chr1:152774396-152774466	Arpc5	89	3448	1.6919	5958.42	CTGCCCTGTGGGTAGCATCTGTTTCTCTCAGCTTTGCCTTCTTGCTTCCTTTTTCATATCTGTAAAGAAG	0.442857	0.557143	1.32503	1.39911	0.0740845	-12	0.57667
main_Ly6e_chr15:74959246-74959316_8861	Mouse 3' UTR GCLiPP Peak	No	chr15:74959246-74959316	Ly6e	52	1795	1.01526	1861.36	TGCAGTTGAGTCCCATCCTGCCCTCTCTGCCCACACTGGCTTCCTGCTGCTATTCTAGTGCCTCAAATAA	0.528571	0.471429	0.127408	0.819437	0.692028	-10.5	0.588156
main_Cd81_chr7:143067405-143067475_23778	Mouse 3' UTR GCLiPP Peak	No	chr7:143067405-143067475	Cd81	17	773	1.6896	1333.99	AGTGACCAGAGGCCACCTTGGGGGACATGGCCTGTGTATATAATATTTCTGTATCACTCTGCTACACTTA	0.457143	0.542857	0.565592	0.792915	0.227324	-16.6	0.475097
main_Dhfr_chr13:92384964-92385034_7475	Mouse 3' UTR GCLiPP Peak	No	chr13:92384964-92385034	Dhfr	4	74	1.26967	95.9642	CCAGTGCGTGCTGAGCAAATGCTATACTGCTGAGCCACCCCAACCCTAGCCCCTATATAATTCTAAACAA	0.485714	0.514286	-0.206718	0.665394	0.872113	-9.9	0.570332
main_Rps20_chr4:3834438-3834508_17078	Mouse 3' UTR GCLiPP Peak	No	chr4:3834438-3834508	Rps20	2	32	0.370319	12.1036	ATGCCTAAGACAACTGAATAAATCGTCTTAATGGTCAAATTTTGCTGGCTTTTGTTCAGGTTTTTTTTTT	0.314286	0.685714	0.491718	0.871634	0.379915	-11.2	0.787505
main_Tmed7_chr18:46587072-46587142_12275	Mouse 3' UTR GCLiPP Peak	No	chr18:46587072-46587142	Tmed7	50	2641	0.809906	2184.7	CCCAGGGACAGGCGCAGGCACACATACTTCTGCATGCAAGAGCAAAATGAATTCAAGTTGTCTTGCTTAC	0.485714	0.514286	0.259169	0.607394	0.348225	-13.6	0.473452
main_Ak2_chr4:129010651-129010721_17983	Mouse 3' UTR GCLiPP Peak	No	chr4:129010651-129010721	Ak2	32	1474	0.69197	1041.77	GGTGGTCATGGGAAGGAAGGATGGATGGATGGTGAGGGAGGTGGGGAGGGGCTCCTCGAGAGAAGATTGG	0.6	0.4	0.477113	0.749958	0.272845	-8.5	0.54571
main_Hmgn1_chr16:96121741-96121811_10585	Mouse 3' UTR GCLiPP Peak	No	chr16:96121741-96121811	Hmgn1	6	147	1.58348	237.749	ACAGGCATTTGGTTGTTGTGAGAGGTCTTGGGGGAACTTGCCGAGTCACTGGAACAAGTTCAAAGAAAAA	0.457143	0.542857	0.31438	0.644042	0.329662	-13	0.461345
main_Ubac2_chr14:122020157-122020227_8425	Mouse 3' UTR GCLiPP Peak	No	chr14:122020157-122020227	Ubac2	11	353	0.947153	341.494	ACCATACACTGTCCTTAAATCCAAGATGGTTGCCGTGTAGTATCAAATAAGTTTGCCATTAAATTAGCAT	0.357143	0.642857	0.465352	0.900563	0.435211	-5.8	0.562198
main_Npc2_chr12:84757073-84757143_6367	Mouse 3' UTR GCLiPP Peak	No	chr12:84757073-84757143	Npc2	19	907	0.21931	203.167	GTTCAGATCACAAGCTAGGCTCCTTGGCGCCTGTGTCTGTGTGGGCTGAGAGGCCATGGACGGAGTGGGG	0.614286	0.385714	0.147972	0.968986	0.821014	-20.4	0.464783
main_Nus1_chr10:52437026-52437096_1936	Mouse 3' UTR GCLiPP Peak	No	chr10:52437026-52437096	Nus1	3	128	2.55256	333.713	TAGAACTGATTTAGTTGTCTGTGGTGGGTGGGGATAATTTTTGTGCAGTCTTTTTTAGTGACCAAACTTT	0.371429	0.628571	0.719324	0.991211	0.271887	-10.1	0.461918
main_Ube2z_chr11:96049744-96049814_4907	Mouse 3' UTR GCLiPP Peak	No	chr11:96049744-96049814	Ube2z	43	1851	0.972655	1838.88	GTCTTCAGTCTTGAAGCAGGGCTTCCCAACACCCTTTTCTTCCCCTCCCCTATTTCCCATGGGCCAGCAT	0.542857	0.457143	1.03201	1.20266	0.170648	-10	0.608324
main_Celf1_chr2:91016345-91016415_14555	Mouse 3' UTR GCLiPP Peak	No	chr2:91016345-91016415	Celf1	89	5559	1.49646	8496.72	AGTTGGATGTTCTCTTGGTGTCCTTCATGTCCTTTTGAACTTTCCCCTGTGTCCATTGTTAGCATGTGCA	0.442857	0.557143	1.94742	1.97472	0.0272958	-7.7	0.588721
main_Lrrc47_chr4:154019876-154019946_18765	Mouse 3' UTR GCLiPP Peak	No	chr4:154019876-154019946	Lrrc47	174	4498	0.763643	3508.31	CAGGCTCCTGTAGGTGTGGGTGTGCTGTAGGTGTCTGTGTGGGTGTGGGTGTGCTGTAGGTGTCTGTGTG	0.585714	0.414286	-0.153155	0.704901	0.858056	-13.1	0.594923
main_Tnpo1_chr13:98842310-98842380_7542	Mouse 3' UTR GCLiPP Peak	No	chr13:98842310-98842380	Tnpo1	35	1228	2.29119	2873.74	TTTGCTTCTCAGTTGGCCTTTAGAGCAAGAGTGGAATAGCTGTTTTATTCTTAGGTTGTAGAATGCCTTG	0.4	0.6	0.309944	0.749324	0.43938	-15.8	0.558558
main_Ybx3_chr6:131365124-131365194_21922	Mouse 3' UTR GCLiPP Peak	No	chr6:131365124-131365194	Ybx3	7	233	0.71203	169.45	GCGCAGGAGAGCAGCCTCCCCAGTTTCAGCAACCTAGTGCTTTCTATTTTTTTCCTGGTTTTTACTGTTT	0.457143	0.542857	1.74689	1.80086	0.0539718	-10.6	0.486809
main_Atp6v1g1_chr4:63550201-63550271_17475	Mouse 3' UTR GCLiPP Peak	No	chr4:63550201-63550271	Atp6v1g1	4	92	0.791241	74.3506	CTGGAAGGCATTAAATTATTTCTCTATGCTGTTGTAGGACCCTTCACTTTTTGAGAGTATCAAATCTAGC	0.371429	0.628571	0.889183	0.998338	0.109155	-7.6	0.478864
main_Eif4a1_chr11:69667540-69667610_4249	Mouse 3' UTR GCLiPP Peak	No	chr11:69667540-69667610	Eif4a1	77	3695	0.667992	2521	CGAGGTGGTCGGTTTGGTCGTAAGGGTGTGGCTATTAACATGGTGACCGAAGAAGACAAGAGGACTCTTC	0.514286	0.485714	1.754	1.8282	0.0741972	-16.2	0.424606
main_Nxf1_chr19:8765385-8765455_12953	Mouse 3' UTR GCLiPP Peak	No	chr19:8765385-8765455	Nxf1	38	2137	0.713753	1557.9	AGCAAAAGCCTGGTGTGCTTAGGCTGTGAGAAAGTCCTTTCTTACTGGGGCTGTCTACTGAGACAGGCCT	0.514286	0.485714	0.300789	0.790394	0.489606	-27.7	0.720274
main_Nucks1_chr1:131932874-131932944_926	Mouse 3' UTR GCLiPP Peak	No	chr1:131932874-131932944	Nucks1	4	79	1.58574	127.952	CAAAGGGTTATTTAAGAAATATTTTTACTCTGGTTTTTAAGACACTTTAAAGAACATTCTTAGATCTGCT	0.271429	0.728571	0.585803	0.70907	0.123268	-9	0.417469
main_Glipr2_chr4:43977607-43977677_17316	Mouse 3' UTR GCLiPP Peak	No	chr4:43977607-43977677	Glipr2	8	332	1.73623	588.753	ACCTCCAAAGAAGTAGCTCTCGCCAGCAAGTGTAACGAGATGGAGATGCATATATGAAGTGCCTATAGAA	0.442857	0.557143	0.623592	1.2179	0.59431	-12.2	0.461255
main_Tdg_chr10:82648798-82648868_2624	Mouse 3' UTR GCLiPP Peak	No	chr10:82648798-82648868	Tdg	18	721	1.41113	1039.18	GAGGGGCTTTAGTGTTAATGGTCCTTTACGCTAGTGGTGTAATTATATATGGAGCAGTTATATGGTAGAG	0.4	0.6	0.498549	0.795563	0.297014	-13.7	0.562353
main_Cbx5_chr15:103194715-103194785_9811	Mouse 3' UTR GCLiPP Peak	No	chr15:103194715-103194785	Cbx5	28	1254	2.05738	2635.12	CTTGCCTTTCCTCTTGGCCCCCATTTCACCTAACATCATCTCTTATTGCTCCTGTCAGAAATATGTTTTA	0.414286	0.585714	0.610704	0.889268	0.278563	-5.1	0.53163
main_Rpl18a_chr8:70895371-70895441_24303	Mouse 3' UTR GCLiPP Peak	No	chr8:70895371-70895441	Rpl18a	14	617	1.59	1002	ACCAAGAGGCCCAACACCTTCTTCTAGACACAGAGACCCACTGAATAAAAACTTGAGACTGTCCTTGCTT	0.457143	0.542857	0.618211	0.965817	0.347606	-6.6	0.739817
main_H3f3a_chr1:180802630-180802700_1582	Mouse 3' UTR GCLiPP Peak	No	chr1:180802630-180802700	H3f3a	18	584	0.837747	499.705	TTTTATCACACAGTAGATTCCATCCATTCACTATACTTTTCTAACTGAGTTGTCCTACATACAAGTACAT	0.328571	0.671429	1.76865	1.77577	0.00712676	-3.9	0.394929
cd8_Ssr1_chr13:37979325-37979395_3442	Mouse 3' UTR GCLiPP Peak	No	chr13:37979325-37979395	Ssr1	3	82	2.61159	218.729	TTTCCTGTTTTGACCCCAAGTTCAATTAATATTTTTTTCCCAGTGTGGTTTTAGGTGAATTGTTTTGAGG	0.342857	0.657143	-0.0403099	0.589099	0.629408	-6.5	0.467604
main_Setd8_chr5:124460896-124460966_20002	Mouse 3' UTR GCLiPP Peak	No	chr5:124460896-124460966	Setd8	9	289	1.8364	542.068	CTGTTACAGGTTTCCAAGGTGGACTTGAACAGATGGCCTTATATTACCAAAACTTTTATATTCTAGTTGT	0.357143	0.642857	2.18032	2.18032	0	-10.9	0.648733
main_Tmed7_chr18:46587746-46587816_12280	Mouse 3' UTR GCLiPP Peak	No	chr18:46587746-46587816	Tmed7	3	82	1.30063	108.932	TCAGACTGTTGTAACTGTTAGGATAAAGAATAATATGAGACACTATGGTATGGTAAGTAAAATAGGAACA	0.314286	0.685714	0.155789	0.62731	0.471521	-4.1	0.521286
main_Arhgdia_chr11:120578790-120578860_5875	Mouse 3' UTR GCLiPP Peak	No	chr11:120578790-120578860	Arhgdia	90	3408	0.521079	1813.81	AGGGCTGGGCTATCTGTCCTCTAGTCCCACCACTCCCTGGCCAGGTCATCCATCACTGTCAGTCACTGTC	0.585714	0.414286	0.0519577	0.89838	0.846423	-15.9	0.49054
main_Rcc2_chr4:140722352-140722422_18468	Mouse 3' UTR GCLiPP Peak	No	chr4:140722352-140722422	Rcc2	90	2704	0.862721	2382.68	GGCTGAGGATGGAAGTGTGAGGGGGGTGGATGGGAAAGTCAAAGTCTGGTCTTGAGGGTCATGGGTTTGC	0.557143	0.442857	0.338704	0.816197	0.477493	-8	0.451677
main_Cd2bp2_chr7:127193325-127193395_23547	Mouse 3' UTR GCLiPP Peak	No	chr7:127193325-127193395	Cd2bp2	34	1257	1.42892	1834.56	TCTGTCCTGGCAGCTCCCTTGTAGCTGGGACATTGGGAAGACCTTGAAATCCTATTGAGAGATTCTCTTA	0.471429	0.528571	-0.035338	0.58038	0.615718	-20.6	0.553787
main_Cks2_chr13:51650515-51650585_7181	Mouse 3' UTR GCLiPP Peak	No	chr13:51650515-51650585	Cks2	22	1066	1.84058	2004.01	CAGCAACAGAGCTCAGTCAAATGCAACTGCAAGTAGGGTTGTTTTAAGTTGTTCAAGATAGTTTCTTGTA	0.385714	0.614286	1.26237	1.36817	0.105803	-12.8	0.395255
main_Adss_chr1:177763908-177763978_1535	Mouse 3' UTR GCLiPP Peak	No	chr1:177763908-177763978	Adss	80	3407	1.38656	4825.01	TCTAGAACTTCCAGTGTAGCTTTTCTTCATTATGGCCGTTGTGTTTGAGGTTGTACCCCGATTAGATGGT	0.428571	0.571429	0.750972	0.848577	0.0976056	-9.4	0.399762
main_Snrpg_chr6:86378776-86378846_21264	Mouse 3' UTR GCLiPP Peak	No	chr6:86378776-86378846	Snrpg	37	1712	0.812329	1420.44	AGTCTGACCTGTGCTCAGCAAGCAGTGTCCACATCCCTCCCCAAAGGCCTGTTTGATTGTGATGTAGAAT	0.5	0.5	0.490859	0.716493	0.225634	-11.3	0.422785
main_Nap1l1_chr10:111496101-111496171_2824	Mouse 3' UTR GCLiPP Peak	No	chr10:111496101-111496171	Nap1l1	37	1362	1.56424	2176.05	CCCTGTAATAGCCTAAACATGACTCATTTACTTACAGCCTTATGGTTTTGTATTTTCTTGGTAGAATCAG	0.357143	0.642857	1.87668	1.92065	0.0439718	-6.3	0.434503
main_Hypk_chr2:121458233-121458303_14899	Mouse 3' UTR GCLiPP Peak	No	chr2:121458233-121458303	Hypk	13	472	1.88656	909.498	TAACCAACTGATAATGTGCTTTTTTAGACATTCTGGACTGACTGACTGACTGAAATAAAGTGTTCTGTTT	0.342857	0.657143	0.762239	1.13751	0.375268	-7.2	0.38376
main_Bbc3_chr7:16318078-16318148_22263	Mouse 3' UTR GCLiPP Peak	No	chr7:16318078-16318148	Bbc3	19	870	2.33502	2074.9	CTGTAAGATACTGTACATGCACTGCTGTAGATATACTGGAATGAATTTTCTGTACATGTTTGGTTAATTT	0.328571	0.671429	2.08227	2.11686	0.0345915	-7.3	0.491588
main_Mri1_chr8:84251489-84251559_24503	Mouse 3' UTR GCLiPP Peak	No	chr8:84251489-84251559	Mri1	7	134	0.663258	90.7769	TGGGTGTGACTGGCTGGCCCTCCGTGCCCTGCCCTGACTTCCTCTGGTTTTATAATAAAGTTCTCAAATG	0.514286	0.485714	0.227225	0.515451	0.288225	-11.7	0.583856
main_Rbpj_chr5:53654693-53654763_19226	Mouse 3' UTR GCLiPP Peak	No	chr5:53654693-53654763	Rbpj	29	1118	1.71863	1962.51	CTACCAAGATGGTGCCCGTAGGGTAAAATGAGGAACATCTCTGCAGGATGATTTATTGTATGTTTTCCTT	0.414286	0.585714	0.869028	0.980155	0.111127	-12.3	0.602548
main_Pdap1_chr5:145130152-145130222_20454	Mouse 3' UTR GCLiPP Peak	No	chr5:145130152-145130222	Pdap1	16	332	0.435969	147.837	GCCCCTATGGCCAGGGGCCCCTACGGCCTGGGGCCTCCTCTTCATCTTGGCACAGAAATTGTTCAGGGGA	0.628571	0.371429	0.976465	1.22345	0.246986	-28.6	0.576473
main_Timm23_chr14:32180251-32180321_7858	Mouse 3' UTR GCLiPP Peak	No	chr14:32180251-32180321	Timm23	24	787	2.32207	1866.55	ATGATCTTGCACCCCAAACTGGAAAACCACTTACTCTCCAAATTCAGGCCATACTTTTTATTACCATGTT	0.385714	0.614286	0.713704	0.946183	0.232479	-2.7	0.493138
main_Vps4b_chr1:106771626-106771696_756	Mouse 3' UTR GCLiPP Peak	No	chr1:106771626-106771696	Vps4b	4	107	1.47139	160.805	TAAGAAAATGACTTTCTTCTGGACTTTGGGATGTTTCCTGTGGATGATGTGGGTATGTGTGTACATATAT	0.371429	0.628571	0.60838	0.855732	0.247352	-10.4	0.475258
main_Hsdl1_chr8:119562882-119562952_25042	Mouse 3' UTR GCLiPP Peak	No	chr8:119562882-119562952	Hsdl1	27	1210	2.60229	3216.1	AAGGTAGTTATTGAAGTGATGTTAGCTCGTTTTTAGCCTGTGTGATGAATGTGTACATTGTAGGGAATGC	0.385714	0.614286	0.299338	0.773	0.473662	-6.7	0.560244
main_Ero1l_chr14:45284428-45284498_7916	Mouse 3' UTR GCLiPP Peak	No	chr14:45284428-45284498	Ero1l	12	630	1.62302	1044.37	CTGTCCCTAAGACTTGGTCTAGTGCCAGGCATACAGTTGGTGTCTAATATTTATTGATGGAAAGTATATG	0.4	0.6	0.567507	0.704042	0.136535	-9.8	0.537917
main_Wipf2_chr11:98900376-98900446_5138	Mouse 3' UTR GCLiPP Peak	No	chr11:98900376-98900446	Wipf2	33	1260	0.36209	465.988	GCTCTGGGACCTCCTGCCCCTTCCCCAGGGTGCTAGGCTGAACTGTGTCCCTTCCCGATCCCACAAGAGA	0.628571	0.371429	0.43038	0.843394	0.413014	-17.4	0.778589
main_Arhgap19_chr19:41769342-41769412_13303	Mouse 3' UTR GCLiPP Peak	No	chr19:41769342-41769412	Arhgap19	87	2088	1.06738	2276.34	CTTGGTGATGTGAGATGGCTGTGTGTTTGTTACCTTGGTGATGTGAGATGGCTGTGTGGTTGTTACCTTG	0.471429	0.528571	0.000676056	0.648817	0.648141	-16.8	0.606868
main_Rap1b_chr10:117815362-117815432_2915	Mouse 3' UTR GCLiPP Peak	No	chr10:117815362-117815432	Rap1b	4	101	3.31035	341.494	TTTAGCATAATAAAAGAAAGTCCAAAGAGCTCCTATATAGACTACTCCAGATAACTTTGCTTCTTTGATA	0.314286	0.685714	2.54593	2.589	0.0430704	-6.1	0.490133
main_Cdv3_chr9:103354454-103354524_26292	Mouse 3' UTR GCLiPP Peak	No	chr9:103354454-103354524	Cdv3	7	258	2.04065	537.745	TTTAGTTTTATGCGGTAACTGGATTTAATTCAACCAAACTCTGGTCCACCAAATGGGGAGTGGGTGGGGG	0.457143	0.542857	0.712986	0.832479	0.119493	-16.1	0.488311
main_Paip2_chr18:35617076-35617146_12121	Mouse 3' UTR GCLiPP Peak	No	chr18:35617076-35617146	Paip2	1	19	1.02464	19.8845	GTTAAGCTGCCATACGTGTTCAGTGTGAATAGTGTTTAAGTTGAAAATATTGTAAAAAAATTATATTTTT	0.257143	0.742857	2.74782	2.74782	0	-10	0.489803
main_Eef1b2_chr1:63179649-63179719_444	Mouse 3' UTR GCLiPP Peak	No	chr1:63179649-63179719	Eef1b2	42	1761	1.97696	3555.86	AAGATAACCCTTGGCTCTTCATTTTGCTGTGAAATGGTATGTCTTCATTTTGAAGGAAAGGATTCAGTGT	0.371429	0.628571	0.248887	0.702183	0.453296	-9	0.740035
main_Cd2bp2_chr7:127193446-127193516_23548	Mouse 3' UTR GCLiPP Peak	No	chr7:127193446-127193516	Cd2bp2	35	1575	1.88582	3033.68	TGTGACTTTCCTACGTAGACAACTTCTACTTGCTGTGTAAAATTCCCTCCATCACTCTTTTCTCCAGTCT	0.414286	0.585714	0.00559155	0.525366	0.519775	-5.5	0.537233
rapidmain_Polr2l_chr7:141473118-141473188_23746	Mouse 3' UTR GCLiPP Peak	Yes	chr7:141473118-141473188	Polr2l	84	2772	1.20585	3414.08	GTGGCTAAGTCCTGTTACCCTGGAAGGAACTGTTTAGTAAAGATGTTTGCAGAACCACCAACAGGTCTAA	0.442857	0.557143	-0.170239	0.841225	1.01146	-13.8	0.614619
main_Grn_chr11:102436726-102436796_5356	Mouse 3' UTR GCLiPP Peak	No	chr11:102436726-102436796	Grn	48	1908	0.594906	1159.35	AGCCACAGGTGTTCTGTGAGCTTGCTTGTGTGTGTGTGCGCGTGTGCGTGTGTTGCTCCAATAAAGTTTG	0.514286	0.485714	0.496225	0.931718	0.435493	-17.1	0.518259
rapidmain_Siva1_chr12:112649021-112649091_6701	Mouse 3' UTR GCLiPP Peak	Yes	chr12:112649021-112649091	Siva1	18	614	1.10699	694.227	TATGTTTGAAGCCTGAGGTGGCCACAGACAGCACAAGATGTTCACACTAAAGAGAGAGAAGGTGGCTTTT	0.457143	0.542857	-0.177423	0.908352	1.08577	-12.9	0.596247
main_Mrpl19_chr6:81961463-81961533_21129	Mouse 3' UTR GCLiPP Peak	No	chr6:81961463-81961533	Mrpl19	15	1049	1.5775	1690.18	CTCTTTGGTTTGAAAGCCATTAAGTTTGCTTTGTAAGGACATAGTGATTAAATGAGCATTCCTCACTTTT	0.342857	0.657143	0.493648	0.730831	0.237183	-9.9	0.479983
main_Rac1_chr5:143506712-143506782_20410	Mouse 3' UTR GCLiPP Peak	No	chr5:143506712-143506782	Rac1	5	214	2.99024	653.594	AAAATTCAGCCCTAAAATGACAAAGCCTTCTTAAAGCCTTATTTTTAAAATCCCCCATTCTTGCTCAGAT	0.342857	0.657143	1.73404	1.75024	0.0161972	-0.6	0.549085
main_Alyref_chr11:120594478-120594548_5881	Mouse 3' UTR GCLiPP Peak	No	chr11:120594478-120594548	Alyref	8	245	1.83799	459.936	TTTTCACCTTTGCCATAATAAAATAGAAATGTGTGTAGAACTGGAGCTGTCTGGTCCATCCTGCTATTAG	0.385714	0.614286	0.948296	1.25185	0.303549	-9.4	0.787235
main_Calr_chr8:84842084-84842154_24529	Mouse 3' UTR GCLiPP Peak	No	chr8:84842084-84842154	Calr	11	262	0.597679	159.94	CAGCTCACACTGAGAGTGTAAGAACTACAAACAAAATTTCTATTAAATTAAGTTTTGTGTCTTCCCTATT	0.314286	0.685714	1.65211	1.71713	0.0650141	-8.2	0.683527
main_Nol7_chr13:43401931-43402001_7095	Mouse 3' UTR GCLiPP Peak	No	chr13:43401931-43402001	Nol7	5	243	2.2119	548.984	CACTGATAAATCATTGTAACGGATCATTATAAAAATCATAAACATATTTTGTTTGGGAAAACAGCTGGTC	0.3	0.7	-0.133676	0.657845	0.791521	-5.6	0.503491
main_Ric8_chr7:140863063-140863133_23700	Mouse 3' UTR GCLiPP Peak	No	chr7:140863063-140863133	Ric8	10	384	2.16019	847.251	ACAGAATACAGGAGAGTTTGGGACAAGACTGTGTATGTGAAGTAGTCAGGTGAAAGGCTATTAAACAGAA	0.4	0.6	0.204465	0.630465	0.426	-13.9	0.643767
main_Ehd1_chr19:6298794-6298864_12822	Mouse 3' UTR GCLiPP Peak	No	chr19:6298794-6298864	Ehd1	67	2206	0.921649	2076.63	AAGCTGTTCCGGGGTTCAGCGGGAGGCATGGGTGATGCTTGGATATGAACAGTGGGATTTTGTGCACAGG	0.542857	0.457143	0.688563	1.15425	0.46569	-18.4	0.555417
main_Ccnd2_chr6:127128259-127128329_21846	Mouse 3' UTR GCLiPP Peak	No	chr6:127128259-127128329	Ccnd2	18	534	1.27601	695.956	CATTCTTCAAAGAGAGTATTCTTTACCTCAGGTTTACTGGACAAAAACAAAACAAAACAAAACCAATAGT	0.314286	0.685714	1.45708	1.49424	0.0371549	-7	0.751239
main_Eif4a2_chr16:23112416-23112486_10151	Mouse 3' UTR GCLiPP Peak	No	chr16:23112416-23112486	Eif4a2	3	80	2.09495	171.179	GAATCATAAGCGAAACAGCACACTGTTTGAATAAAGAGCGAGTCGGTATTTATATTTGATTTTCTTTTGT	0.328571	0.671429	2.39993	2.40185	0.00191549	-10.9	0.500261
main_Mrpl11_chr19:4964826-4964896_12697	Mouse 3' UTR GCLiPP Peak	No	chr19:4964826-4964896	Mrpl11	40	1748	1.09486	1954.73	GGGGCCACAGAGGAAGCTGAGCCAAAGGACTTCATGGCAACCCGATTTCTAGTTTCCTGACATGTTTCTG	0.514286	0.485714	-0.125141	0.596268	0.721408	-15.9	0.446
main_Jund_chr8:70700371-70700441_24260	Mouse 3' UTR GCLiPP Peak	No	chr8:70700371-70700441	Jund	36	1869	2.13219	4070.26	TTTATGTTTCTACTCGGGAACAAACGTTGGTTGCGTGTTGAGTGTGTGTTTCCTTGTGTTGGTTTTTTAA	0.385714	0.614286	1.6481	1.67737	0.0292676	-11.5	0.452149
main_Zfp207_chr11:80395742-80395812_4636	Mouse 3' UTR GCLiPP Peak	No	chr11:80395742-80395812	Zfp207	4	104	0.667388	70.8924	CTGAAGTTGCAATTTATACTGTATGGCTTCTTTTTCATGTTTCATCTAGGTTTTTAGAAGTGAAGTATAG	0.314286	0.685714	2.63346	2.63346	0	-10.5	0.385833
main_Arhgdia_chr11:120579177-120579247_5880	Mouse 3' UTR GCLiPP Peak	No	chr11:120579177-120579247	Arhgdia	17	659	0.222207	149.566	AGGAGTGGAAGGACTGAGCTCCAGCTGGGAGACGGGCAGGGCGACGGACAGACAGAAGGACCGACATGCC	0.642857	0.357143	0.635183	1.06239	0.427211	-17.1	0.481907
main_Racgap1_chr15:99621296-99621366_9660	Mouse 3' UTR GCLiPP Peak	No	chr15:99621296-99621366	Racgap1	32	1214	1.71101	2121.59	TGCACGAGACACCCCTGTCTGCTCTTCAGCCTCCTGTGTAATGACTACTTTTAGCATTTTCCAGACTTTA	0.457143	0.542857	1.04217	1.1211	0.0789296	-10.2	0.449795
main_Bak1_chr17:27020385-27020455_10854	Mouse 3' UTR GCLiPP Peak	No	chr17:27020385-27020455	Bak1	67	2246	0.652734	1497.39	GACCAACTGTAGGAGACTGCATGACCTACTTCACCCCCACCTCATCGTCCATTTCCCCAACCCTACCCCC	0.571429	0.428571	-0.304887	0.61007	0.914958	-4.9	0.598981
main_Elavl1_chr8:4289436-4289506_23842	Mouse 3' UTR GCLiPP Peak	No	chr8:4289436-4289506	Elavl1	3	124	2.14341	271.466	AAACTTTTTTGTTAGTGTACAACTCATTTTGCGCCAATTTTCACAAGTGTTTGTCTTAGTCTAAATGAGA	0.314286	0.685714	2.40131	2.40131	0	-6.1	0.501267
main_Cox7b_chrX:106021886-106021956_27170	Mouse 3' UTR GCLiPP Peak	No	chrX:106021886-106021956	Cox7b	1	21	2.57964	55.3307	CAAAGAATCATGTACTCATTATACTATGGCAGATTGAAGAACAAATAAAGAAATAAAGTACCTTAACCTT	0.285714	0.714286	0.643197	0.803	0.159803	-3	0.628326
main_Eif2s2_chr2:154872430-154872500_15315	Mouse 3' UTR GCLiPP Peak	No	chr2:154872430-154872500	Eif2s2	13	419	2.3555	1008.06	TACTTTTTAAAATCGTTCATAGACTTCTGTAAAATGCAAGATAAATTAAAGTTATTATAACAGTAATTCT	0.214286	0.785714	2.52679	2.52679	0	-3.7	0.407552
main_Eif3f_chr7:108941622-108941692_23264	Mouse 3' UTR GCLiPP Peak	No	chr7:108941622-108941692	Eif3f	41	1784	1.67248	3047.51	CTTGAGTCACGGTGACTCAGTCAGCTGCTTGTGACTCCAAATAAACATAGCTTACCTTTTGTAAATGAAC	0.414286	0.585714	0.975268	1.09135	0.116085	-13.4	0.744204
main_Ago2_chr15:73104529-73104599_8825	Mouse 3' UTR GCLiPP Peak	No	chr15:73104529-73104599	Ago2	15	734	0.95715	717.57	GAGCTCACACCTAGGAACACTTGTGGGCTGGGGCAAAAAATCTTGAGCTGGGAGTTTTGTTTTGATCACC	0.485714	0.514286	-0.0851831	0.819577	0.904761	-17	0.633472
main_Lasp1_chr11:97836281-97836351_5054	Mouse 3' UTR GCLiPP Peak	No	chr11:97836281-97836351	Lasp1	72	3321	0.876774	2974.02	ATGGCATCACATCTGTCCTGGGGCCTGACCCGTCCACCCTTCAGTGTCTCTGTCTTTTAAGATCTTCAAC	0.514286	0.485714	0.460042	0.820549	0.360507	-10.8	0.545631
main_Ado_chr10:67547153-67547223_2121	Mouse 3' UTR GCLiPP Peak	No	chr10:67547153-67547223	Ado	33	1351	1.52247	2100.84	GGGATTTGCCTTTAAAGCAAAGACGATTATTATCCTCAGCTGACTTTTTCCTTGACGTGCTTCAAAGATG	0.4	0.6	0.70231	0.838423	0.136113	-6.8	0.621951
main_Rpl17_chr18:75003216-75003286_12488	Mouse 3' UTR GCLiPP Peak	No	chr18:75003216-75003286	Rpl17	1	17	1.04561	18.1554	ACAAAAACTCATGGCCCGGGAATAAATTCAGCATAAAATAAAGGCAGATAAAGTTAAAGGTCTTCTGGTG	0.371429	0.628571	1.02499	1.1771	0.152113	-5.7	0.604385
main_Rbbp4_chr4:129309678-129309748_18008	Mouse 3' UTR GCLiPP Peak	No	chr4:129309678-129309748	Rbbp4	30	2002	1.55294	3175.46	TGGCAGTTGTTCCACTGGTGAACTGTCAAGTTGAGAAAGAGTGGATTGCTAGTTTGTGTTTGTTTTTAAG	0.4	0.6	1.25196	1.34063	0.0886761	-15.5	0.453183
main_Etnk1_chr6:143203992-143204062_22053	Mouse 3' UTR GCLiPP Peak	No	chr6:143203992-143204062	Etnk1	1	17	0.0497908	0.864542	TTTTTGAATTGGAAATTGGAAATCATTTCTTTTGGGGGAGTACAACTTAGAATTAAATTGTCTCTACATA	0.285714	0.714286	0.390746	0.787451	0.396704	-8.2	0.556865
main_Gltp_chr5:114670263-114670333_19617	Mouse 3' UTR GCLiPP Peak	No	chr5:114670263-114670333	Gltp	4	61	0.263646	16.4263	AGCCAGCCCAGCCTGGCCAGCCTGGGTCTGCAGGGGGCAGCCTTAGCTTGTTAGAGGTCTTTTGTTTTCT	0.585714	0.414286	-0.0301972	0.681268	0.711465	-20.6	0.563697
main_Rdx_chr9:52086483-52086553_25758	Mouse 3' UTR GCLiPP Peak	No	chr9:52086483-52086553	Rdx	39	1729	0.796509	1406.61	TGTTCTTGTGATCCATGTCCTTCATAAGCTGAACCACCACCAGAGAAAAGCAGGCCTGTGCAGTGCAGAT	0.485714	0.514286	1.91414	1.91414	0	-9.4	0.557573
main_Mgea5_chr19:45751520-45751590_13412	Mouse 3' UTR GCLiPP Peak	No	chr19:45751520-45751590	Mgea5	14	669	2.8025	1914.96	GCCTAAATTGACAAACTTGTAAATCTCTGTATATAGATTAGCTGTAACCCGACTGTTCTTTGTTTACTGT	0.342857	0.657143	1.28448	1.31758	0.0330986	-3.8	0.529097
rapidmain_Laptm5_chr4:130934735-130934805_18098	Mouse 3' UTR GCLiPP Peak	Yes	chr4:130934735-130934805	Laptm5	38	1477	0.492851	743.506	GCTCAGGATACTCAGCCTAGCAGCCCGTCTCGTCTCCATCAGCAGTGACACTTGTTCAGAGCGCAGCCAT	0.571429	0.428571	-0.348366	0.668451	1.01682	-10.9	0.53821
main_Ddx17_chr15:79529902-79529972_9111	Mouse 3' UTR GCLiPP Peak	No	chr15:79529902-79529972	Ddx17	15	541	1.91506	1058.2	ATCTAAAGGAACACTGTCTTTTACCCTTCTAGACCTTTTCATTTTTATTTTTTCTTTTCTCAACCATTAC	0.3	0.7	0.612775	0.939113	0.326338	-3.9	0.540008
rapidmain_Yrdc_chr4:124854961-124855031_17863	Mouse 3' UTR GCLiPP Peak	Yes	chr4:124854961-124855031	Yrdc	32	973	1.17702	1169.73	TCTAGGAGCCGAGGGCAAAGCTGTCTGGGTACAGGGGAGTGGTTATTGGGGAAATTATTCTAGGGGTCCC	0.542857	0.457143	-0.54193	0.83207	1.374	-17.3	0.61353
main_Nucks1_chr1:131932654-131932724_924	Mouse 3' UTR GCLiPP Peak	No	chr1:131932654-131932724	Nucks1	21	698	1.63832	1168	CAAAGCATCAAGATCAGGTTTGATCCTCCACATTCAGGTCCCACTCGCCAATAGAAGAAAAGATTAGGGG	0.457143	0.542857	0.23969	0.619211	0.379521	-6.5	0.452769
main_Tomm20_chr8:126934625-126934695_25209	Mouse 3' UTR GCLiPP Peak	No	chr8:126934625-126934695	Tomm20	6	182	1.12084	208.355	GATTGGAAAAGAATCTGAGGAAGAGTTGAATAACACACATTCTAAAGACTAGAACATTTTATTGTATGTT	0.3	0.7	0.239127	0.677493	0.438366	-5.1	0.413735
main_Csrnp1_chr9:119972069-119972139_26611	Mouse 3' UTR GCLiPP Peak	No	chr9:119972069-119972139	Csrnp1	3	86	1.4862	130.546	TCCTGCTCATGGTGCCATGTGGGCACCCTCTATTTTTACATTAACACTCTGAATTTATTTATTTTTTTAT	0.342857	0.657143	0.508944	0.896014	0.38707	-10.8	0.704037
main_Flii_chr11:60714158-60714228_4086	Mouse 3' UTR GCLiPP Peak	No	chr11:60714158-60714228	Flii	10	454	1.08322	502.299	ACAGCCCCAAGCCCCACCAGTGTGTCCACATGTGTGCAGATGTAGTTTAAAAGATATTAAATGCTTTTAT	0.414286	0.585714	0.542986	1.07631	0.533324	-6.6	0.57127
main_Ubfd1_chr7:122079864-122079934_23370	Mouse 3' UTR GCLiPP Peak	No	chr7:122079864-122079934	Ubfd1	67	4471	1.12039	5116.36	CTGAAAGGAGGGACAGTCTCTTGGTGGATGATCCTTGTGCTGTTTGCTGTTTCTCTGCTGCTGTCTTTGC	0.5	0.5	1.18282	1.36186	0.179042	-16.5	0.524173
main_Adss_chr1:177764187-177764257_1538	Mouse 3' UTR GCLiPP Peak	No	chr1:177764187-177764257	Adss	22	729	1.96342	1461.94	TCAGCTCTTCTAAGGATTGCCAGCAACGCATGAGACACTCCTTAAGAGGAAGGGAAAAAGACTTAAACAT	0.428571	0.571429	0.877183	1.23532	0.358141	-13.7	0.388413
main_Rab11a_chr9:64716787-64716857_25985	Mouse 3' UTR GCLiPP Peak	No	chr9:64716787-64716857	Rab11a	13	556	1.44626	821.315	AACATCTAAGGCGTCTCTTCCCCTAGAAGGCTGTGTATAGTCCATTTCCCAGGTCTGAGATTTAAATATA	0.414286	0.585714	1.95552	1.9738	0.0182817	-9.9	0.500701
main_Rbm17_chr2:11585500-11585570_13684	Mouse 3' UTR GCLiPP Peak	No	chr2:11585500-11585570	Rbm17	11	396	1.93015	780.681	ACACAGGCATGGCTGTTGTGTCCATGGCTGGTGGACACTGAAACTCTTGGATGGACTTCTAAAATATATG	0.457143	0.542857	0.568423	0.896761	0.328338	-18.3	0.41953
main_Tmsb4x_chrX:167207132-167207202_27332	Mouse 3' UTR GCLiPP Peak	No	chrX:167207132-167207202	Tmsb4x	12	271	2.63616	729.673	GCAGGATGTAAAATGCAGTTTAATCAGAGTGCCATTTTTTTTTGTTCAAACAATTTTAATTATTGGAATG	0.285714	0.714286	1.88611	1.88831	0.00219718	-8.4	0.39826
main_Ndufb6_chr4:40270672-40270742_17222	Mouse 3' UTR GCLiPP Peak	No	chr4:40270672-40270742	Ndufb6	5	221	1.07242	242.072	ACAAGTATGTTCCTAAAGTGCTGTATTTACTGAATCTGTTTCCTGGAAAAGTAATTAATAAAGCTTATTC	0.3	0.7	0.973535	1.13827	0.164732	-5.9	0.511471
main_Ube2c_chr2:164772541-164772611_15555	Mouse 3' UTR GCLiPP Peak	No	chr2:164772541-164772611	Ube2c	57	2015	0.747307	1538.02	GTCTCCAGCCAAGATCCCTGATGCAAGCTGGCCGCCCTGCCCCTCTTTTGTGTTGTCTTTTTTCTTAGAC	0.528571	0.471429	0.474014	0.840099	0.366085	-10.5	0.499669
main_Sra1_chr18:36667542-36667612_12171	Mouse 3' UTR GCLiPP Peak	No	chr18:36667542-36667612	Sra1	9	289	1.84812	545.526	CTCATGGTTGACCATGTGACTGAGGTCAGTCAGTGGATGGTGGGAGTAAAAAGATTAATTGCAGAAAAGA	0.428571	0.571429	2.0572	2.16923	0.112028	-17.2	0.446919
main_Eif4a1_chr11:69667361-69667431_4246	Mouse 3' UTR GCLiPP Peak	No	chr11:69667361-69667431	Eif4a1	7	363	0.939715	348.41	TGGGGTGGGGCTAAGGAAGAGCTGGAGGGGGGAGGGGAGGGAGCCAAGGGATGGACATCTTGTTTTTGTT	0.585714	0.414286	1.57401	1.67945	0.105437	-11.1	0.479309
rapidmain_Ago2_chr15:73103847-73103917_8823	Mouse 3' UTR GCLiPP Peak	Yes	chr15:73103847-73103917	Ago2	48	2002	0.733556	1499.98	ACCACTGTGTGCACCATGCAGCAGGTCCCTCCCTCCCCAAGCTGATGAAGCAATGCAAAACTCTAGAGAG	0.542857	0.457143	-0.52169	0.803944	1.32563	-12.8	0.761766
cd8_Srrm1_chr4:135321279-135321349_8921	Mouse 3' UTR GCLiPP Peak	No	chr4:135321279-135321349	Srrm1	3	102	1.02071	106.339	TAAGCGGACATGTTTGTTATGTTGTAAATTTTATTTGGTTTGTACTCAATTCAATTTCAAAATTGCTAAA	0.257143	0.742857	1.99965	2.04849	0.0488451	-7.8	0.372811
main_Uhrf1_chr17:56323385-56323455_11608	Mouse 3' UTR GCLiPP Peak	No	chr17:56323385-56323455	Uhrf1	3	74	1.05234	79.5379	TGGACAGCACAGTTCTAAGGGTTGTGTTTTGTTTTGTGTGGGGTATTTTTTCCTTGTTAGATTGTTAACA	0.371429	0.628571	0.084493	0.66731	0.582817	-10.7	0.399498
main_Carhsp1_chr16:8659592-8659662_9904	Mouse 3' UTR GCLiPP Peak	No	chr16:8659592-8659662	Carhsp1	30	919	1.38526	1300.27	ACAGAGCCCTGTTTTGCCCCTGCCTGCAACACTGGAGAGCTGTGTTTCAAATGAATTGATCCCTAGACTT	0.485714	0.514286	-0.0956338	0.638986	0.73462	-12.6	0.615405
main_Mapk1_chr16:17045221-17045291_10020	Mouse 3' UTR GCLiPP Peak	No	chr16:17045221-17045291	Mapk1	10	271	2.21137	612.096	AGCAATGCAATGCACTTGTAACTCATGGAAATAAATGTACATCTTTATCTTTACACCCATGATAAGATTC	0.328571	0.671429	1.52596	1.55759	0.0316338	-10.7	0.496036
main_Ago2_chr15:73104092-73104162_8824	Mouse 3' UTR GCLiPP Peak	No	chr15:73104092-73104162	Ago2	53	2312	0.728922	1721.3	CTGGCCAAGTTTGACGACTGCCCACTTGCTAGCTGTGTTCCCAACCCCACTGTTAAGTAAGGTGTGCCTT	0.528571	0.471429	0.418	1.09789	0.679887	-13.5	0.719512
main_Srsf3_chr17:29041983-29042053_10974	Mouse 3' UTR GCLiPP Peak	No	chr17:29041983-29042053	Srsf3	50	1923	2.8699	5636.81	GTTTAAGGGTACATTGTAGAGCTCAACTTTTCAGTTACTGTGCAAGATTGTTTTTCATGCTGTCATTTGT	0.357143	0.642857	2.09882	2.11161	0.0127887	-9.4	0.533265
main_Atp5g3_chr2:73908633-73908703_14412	Mouse 3' UTR GCLiPP Peak	No	chr2:73908633-73908703	Atp5g3	56	2801	0.952513	2725.04	CCTTCACTGAAGCAGCAGCTGTTCTCATATGCTATCCTGGGATTTGCCTTGTCTGAAGCTATGGGTCTCT	0.485714	0.514286	2.49628	2.52186	0.0255775	-11.6	0.405638
main_Stx16_chr2:174097215-174097285_15769	Mouse 3' UTR GCLiPP Peak	No	chr2:174097215-174097285	Stx16	60	3408	0.9977	3472.87	AAGGACTTGATGCTGTTGCCGAAGAGACTGGCCTATGATGAGCTGTCGTGTGAATACGTGCTTTAGTGAA	0.471429	0.528571	0.194535	0.655606	0.46107	-9.7	0.630318
main_Ppp2ca_chr11:52122794-52122864_3798	Mouse 3' UTR GCLiPP Peak	No	chr11:52122794-52122864	Ppp2ca	75	4414	0.898219	4049.51	ACATACCGCAGTTTGTCTTGTTGCTGGCCTGCGCTTGTGAAAGGAAATCTGTGCTGTTTTAGTGGGACTT	0.471429	0.528571	0.513366	0.770915	0.257549	-14	0.446355
main_Nxf1_chr19:8766593-8766663_12964	Mouse 3' UTR GCLiPP Peak	No	chr19:8766593-8766663	Nxf1	57	2002	0.939459	1921.01	AGCCTTCAAGGCAATTAAGAAGGGGGTGCCCCTGGTGAGGAGGGGAATGGGGGTTCTTGTCCCCATGTTT	0.557143	0.442857	0.636859	0.972859	0.336	-24.3	0.688763
main_Luc7l2_chr6:38608545-38608615_20761	Mouse 3' UTR GCLiPP Peak	No	chr6:38608545-38608615	Luc7l2	8	454	1.51017	700.279	GTTCTCTATTCTTTCAAGTTAGGAGTGATAGTGAATGAATTGTGTTAATGTCTTGCAGTTTTTGAACATT	0.314286	0.685714	1.36189	1.39518	0.0332958	-11.5	0.583323
main_Btf3l4_chr4:108816446-108816516_17648	Mouse 3' UTR GCLiPP Peak	No	chr4:108816446-108816516	Btf3l4	14	408	2.28623	952.725	GGACAGCAGATTGGATAACAGTTATATCTTCCTATTCCTTCCTCCAATAGAAATAAAGCAAATCTTTACA	0.342857	0.657143	1.38692	1.44511	0.0581972	-4.8	0.58075
main_Mlec_chr5:115146739-115146809_19677	Mouse 3' UTR GCLiPP Peak	No	chr5:115146739-115146809	Mlec	79	4985	1.32527	6747.75	TGTTTAGAATGTCCAGAATCTGATGTCCATCTGTCCCTGTGTCTTCTGTCCTCTTTCAGCTAGTTTAGGC	0.442857	0.557143	0.497732	0.710972	0.213239	-6.4	0.499547
main_Pten_chr19:32820213-32820283_13241	Mouse 3' UTR GCLiPP Peak	No	chr19:32820213-32820283	Pten	41	1805	2.55996	4719.53	TGACACTTGTTGTCCAGTTAAAAAAAGGTTGTGTAGCTGTGTCATGTATATACCTTTTTGTGTCAAAAGG	0.357143	0.642857	2.11552	2.13848	0.0229577	-14.8	0.472251
main_Cox6c_chr15:35931980-35932050_8571	Mouse 3' UTR GCLiPP Peak	No	chr15:35931980-35932050	Cox6c	6	157	1.63358	261.956	CTGAACTATGAAACATGAATATGTGTGGGCTAAGGAATAGTTTCTTTCAATAAACAGTAATTATATGGAC	0.314286	0.685714	0.720493	0.94007	0.219577	-6.1	0.659377
main_Arpc1b_chr5:145127948-145128018_20443	Mouse 3' UTR GCLiPP Peak	No	chr5:145127948-145128018	Arpc1b	20	831	1.66742	1415.26	TTCTAGGATGCAGTACACTGCTACAAAGGAAGAGGCAGGAGGGGAACTGCCTATTTAACAAAATGTGCCT	0.457143	0.542857	0.18938	0.830056	0.640676	-16.5	0.534474
main_Pafah1b2_chr9:45966833-45966903_25712	Mouse 3' UTR GCLiPP Peak	No	chr9:45966833-45966903	Pafah1b2	38	1936	1.01696	2010.92	AGCAGCCATCAGGGCTGGTAGAGGAGCTATTGTTGGTTTGTGCTGAGACCTGCACCTGACTGAGAAAGAT	0.514286	0.485714	0.230127	0.710127	0.48	-20	0.472949
main_Kif5b_chr18:6203629-6203699_11913	Mouse 3' UTR GCLiPP Peak	No	chr18:6203629-6203699	Kif5b	7	150	1.4841	227.375	AAGTAATTGAAGTTTGAAGAGGACATAAAATCAGTCTTTCACTAACTAACCTCTATTCCTTGGGATTGTA	0.328571	0.671429	0.929563	1.10872	0.179155	-8	0.47431
main_Wsb1_chr11:79240140-79240210_4591	Mouse 3' UTR GCLiPP Peak	No	chr11:79240140-79240210	Wsb1	13	383	1.20447	471.175	AGGCTCAGCAGATTTATTTAATTGGAATCCACTCTTATTCTTCATTTCATTAGTTGGACTTTTAAAGCAT	0.314286	0.685714	1.08728	1.14993	0.0626479	-4.8	0.544243
main_Ppia_chr11:6419716-6419786_3357	Mouse 3' UTR GCLiPP Peak	No	chr11:6419716-6419786	Ppia	3	183	0.545794	102.016	TGAAGTTCTTTGGGTTCCATATTTTCCTCATTCCCCTTCAAGTCTAGCTGGATTGCAAAGTTAAGTTTAT	0.371429	0.628571	0.706507	0.945718	0.239211	-8.3	0.41669
main_Pold3_chr7:100083217-100083287_23167	Mouse 3' UTR GCLiPP Peak	No	chr7:100083217-100083287	Pold3	90	4298	0.607556	2667.11	CTGGATGTGTTCACCGCGTCTCCACTTTCCTCTCCACACTACCATACTTCTGTCCCCCGACCCCACAATC	0.557143	0.442857	0.135408	0.576845	0.441437	-7.4	0.530542
main_Scd2_chr19:44303342-44303412_13346	Mouse 3' UTR GCLiPP Peak	No	chr19:44303342-44303412	Scd2	76	3932	1.24921	5016.94	AAAAATCGGAAGTCGACAGCTCTTCCTTCTATGCTAAGCTCATCTTCCCTTCTAGTTTCTTTTCCCGTTG	0.428571	0.571429	0.506732	0.793577	0.286845	-8.2	0.660164
main_Nudcd3_chr11:6107760-6107830_3331	Mouse 3' UTR GCLiPP Peak	No	chr11:6107760-6107830	Nudcd3	18	421	0.814275	350.14	TGTGGAGCCAGGCACCTGCATGAGGGCCAGCGGGGCATGGCTGTGGGGCTGCTATGGGGTTCCCTCACTT	0.657143	0.342857	-0.102085	0.733718	0.835803	-29.8	0.602272
main_Aph1a_chr3:95896884-95896954_16577	Mouse 3' UTR GCLiPP Peak	No	chr3:95896884-95896954	Aph1a	66	3405	1.15345	4011.48	GATGAAGTTACTGAGGCTGAGGGTAGATGGGTTCAGTTCAGTGTCTCCTGCCCAGACTGGACATCTTGGT	0.514286	0.485714	1.01244	1.17325	0.160817	-15.5	0.45804
main_Nfyb_chr10:82750274-82750344_2641	Mouse 3' UTR GCLiPP Peak	No	chr10:82750274-82750344	Nfyb	41	2397	1.69642	4153.26	AAGTGAGGGTGAAGCTGCCTCCTTGTACCATAAGTAGCTGTAATGTAGCTTCCTGATGCTTGACTAATTG	0.442857	0.557143	1.62159	1.71697	0.0953803	-15.1	0.510182
main_Dnajc7_chr11:100582865-100582935_5193	Mouse 3' UTR GCLiPP Peak	No	chr11:100582865-100582935	Dnajc7	29	1126	0.813367	935.434	GCTGAGGACTAGGGAGGGAGGGAAGCCAGGGGTAGACAGGGAAGCAGGCAGCTTGTGAATTTTTGTTGTA	0.542857	0.457143	1.27649	1.43317	0.156676	-9.4	0.443886
main_Nras_chr3:103065650-103065720_16676	Mouse 3' UTR GCLiPP Peak	No	chr3:103065650-103065720	Nras	10	256	1.66644	435.729	CGTGGAAACTGAAGCCAGAGTCCATACCTCCATCTCCTTCCCCCCCCAAAAAAATTAGATTAATGTTCTT	0.442857	0.557143	0.0632113	0.561493	0.498282	-8	0.533492
main_Rab1_chr11:20225082-20225152_3464	Mouse 3' UTR GCLiPP Peak	No	chr11:20225082-20225152	Rab1	40	1485	2.08219	3158.17	GTGTGTAATCCTTGTTGCTTTCCTGATACCAGATCGTTTCCCGTGGTTGGTTAGAATATATTTTGTTTTG	0.385714	0.614286	2.43511	2.44131	0.00619718	-6.9	0.465704
main_Gpn1_chr5:31511358-31511428_19057	Mouse 3' UTR GCLiPP Peak	No	chr5:31511358-31511428	Gpn1	14	578	1.81736	1072.9	GTAGCCCATTTTCAAGAATACTGTTAGGATGGTGACTTGGATAAAGATTTTGACTTTAACTTTGTGGTAA	0.342857	0.657143	0.540099	0.839394	0.299296	-8.4	0.63999
main_Tmem183a_chr1:134347839-134347909_1038	Mouse 3' UTR GCLiPP Peak	No	chr1:134347839-134347909	Tmem183a	21	1082	0.478765	529.1	CACAGGCTGTTTGGGTTCCTGGGGCTCCTGTTACAGGAGGTGGAAAGGTTGAATCAAGAGGAAAACCAAC	0.514286	0.485714	0.672944	0.814268	0.141324	-17.7	0.557296
main_Mid1_chrX:169989612-169989682_27350	Mouse 3' UTR GCLiPP Peak	No	chrX:169989612-169989682	Mid1	40	1166	0.640277	762.526	AGGGTCATCCCCCTGCCTCACACGGTCACTCAGGGTCATCCCCCTGCCTCAGAAAATCATTCACAGTCAT	0.557143	0.442857	0	0	0	-13.2	0.511655
main_Atp5b_chr10:128090178-128090248_3067	Mouse 3' UTR GCLiPP Peak	No	chr10:128090178-128090248	Atp5b	58	1657	0.996116	1685.86	TTTCCTTCCATGCAGGCCACACAAGAGCCTTGATTGAAGATGTGATGTTCTCTCTGAAGAGTATTTAAAG	0.414286	0.585714	1.084	1.11893	0.0349296	-12	0.427558
main_Tvp23b_chr11:62894449-62894519_4152	Mouse 3' UTR GCLiPP Peak	No	chr11:62894449-62894519	Tvp23b	55	2639	2.35202	6339.69	GCATTCCTGTACATGGTTTTTGGGGTAAGTTTTGATTCAGTGGTAAGGGTGAACATGTTGGTTTATGTAT	0.385714	0.614286	0.503859	0.707042	0.203183	-7.8	0.509481
main_Gm10094_chr14:57802093-57802163_8107	Mouse 3' UTR GCLiPP Peak	No	chr14:57802093-57802163	Gm10094	3	159	0.415236	67.4343	TTGAAGTTATTTTTCAGCCAGTTTGTAAAATAAACTTACTTAATCCTTTCTTCCCCCGGACTTTGCCATT	0.342857	0.657143	0.844718	1.09001	0.245296	-6.5	0.416052
main_Arih1_chr9:59391822-59391892_25919	Mouse 3' UTR GCLiPP Peak	No	chr9:59391822-59391892	Arih1	3	84	1.17897	101.151	AGAATAATGCATTTTAGCTGTGATGTCCATTTTTATGAAATTTCTACTAAAAGCTATGTTAAAAGTAAAG	0.257143	0.742857	2.03096	2.03096	0	-7.6	0.483539
main_Eif4a2_chr16:23112353-23112423_10150	Mouse 3' UTR GCLiPP Peak	No	chr16:23112353-23112423	Eif4a2	55	3029	0.708397	2191.61	TCGATAGCGGCAGTTGATGACGAGATGGCACTCAGAAACGGCGTTGACGTAATTTAGGACGTGGAATCAT	0.485714	0.514286	2.33449	2.36235	0.0278592	-11.3	0.405609
cd8_Capza1_chr3:104824895-104824965_8136	Mouse 3' UTR GCLiPP Peak	No	chr3:104824895-104824965	Capza1	13	630	2.40632	1548.39	TCCAGTACATGGAAAGAAAAGGATTCAACACGGTGTGGTCATATGACGAATAAGTGATTTATAAACAAAC	0.357143	0.642857	1.18411	1.36318	0.17907	-9.7	0.494506
main_Srsf1_chr11:88049607-88049677_4779	Mouse 3' UTR GCLiPP Peak	No	chr11:88049607-88049677	Srsf1	7	196	4.73749	948.403	ATGATTGGTGACACTTTTTGTAGAACCCATGTTGTATACAGTTTTCCTTTACTCAGTACAATCTTTTCAT	0.328571	0.671429	2.23328	2.24089	0.00760563	-9.1	0.402672
main_Lyrm9_chr11:78839143-78839213_4573	Mouse 3' UTR GCLiPP Peak	No	chr11:78839143-78839213	Lyrm9	51	1836	0.812788	1524.19	TCTGGAGCTTACGGCGAGCGCTTAGCTGCCCTGGAGTCACTTGGAACTGAGAAGCCTTCTGCTCTTGGAA	0.557143	0.442857	0.00414085	0.664704	0.660563	-17.4	0.502683
rapidmain_Mrpl55_chr11:59205802-59205872_4036	Mouse 3' UTR GCLiPP Peak	Yes	chr11:59205802-59205872	Mrpl55	14	674	1.75568	1208.63	AATAAGTCTGTCAGGGAGTTCCACCAGGGACATTTTGTAAGGATGGAGGGCATCTATCTATTTACCATAC	0.428571	0.571429	-0.268141	0.835042	1.10318	-16.3	0.494495
main_Prkar1a_chr11:109668673-109668743_5540	Mouse 3' UTR GCLiPP Peak	No	chr11:109668673-109668743	Prkar1a	9	232	1.39371	330.255	ATTGTTTTTTGTTTGTGTGTGTGTGTTTAAAGTAAACTTGTGTTCTTGACTGTATTTCAGTATTTTCCAG	0.3	0.7	0.745155	0.840817	0.095662	-3.5	0.536807
main_Ywhaz_chr15:36771705-36771775_8601	Mouse 3' UTR GCLiPP Peak	No	chr15:36771705-36771775	Ywhaz	4	180	1.17091	215.271	CAATCCAAGCATAATTGTTAAGAACACATGTATTAAAGTTCATGTAAGTGGAATAAAAGTTTTATGAATG	0.271429	0.728571	2.08751	2.09787	0.0103662	-6.7	0.33185
main_Ywhaq_chr12:21390665-21390735_6030	Mouse 3' UTR GCLiPP Peak	No	chr12:21390665-21390735	Ywhaq	37	1414	1.35527	1957.32	TTCATTTGCTGCTGTTTAAGTTGACAACTTCCTTCCCAATAAAAATTCACTTACACCTCCTGCCTTCGTA	0.385714	0.614286	1.9879	1.9879	0	-2.2	0.435028
main_Rbpj_chr5:53653642-53653712_19214	Mouse 3' UTR GCLiPP Peak	No	chr5:53653642-53653712	Rbpj	26	906	1.535	1420.44	GAAACTGACTTGAATGCAGCAAAAAGTTGACAGAGAAAGGCAAGGATAAAGTGAACAATCTTTTGTGGTT	0.371429	0.628571	1.14423	1.38358	0.239352	-7.7	0.466107
main_Ppp1cb_chr5:32492002-32492072_19073	Mouse 3' UTR GCLiPP Peak	No	chr5:32492002-32492072	Ppp1cb	26	1144	1.65589	1934.85	CAGAACATGAGAATCCTTTTTGACAAGCCTTGGATAGCTGGCTCTCTTCTTTCCCTCTCTCTATGTGAAG	0.442857	0.557143	1.34386	1.48524	0.14138	-10	0.452529
main_G3bp2_chr5:92054098-92054168_19400	Mouse 3' UTR GCLiPP Peak	No	chr5:92054098-92054168	G3bp2	34	1604	1.12771	1847.53	CTGCTTGCTGTGACCAGCGTGTGCACACAAACCTTAACAAGACTGCAAATACTCCAGAAGGAAGTCATTT	0.457143	0.542857	1.99941	1.99941	0	-11.2	0.401054
main_D17Wsu92e_chr17:27753779-27753849_10919	Mouse 3' UTR GCLiPP Peak	No	chr17:27753779-27753849	D17Wsu92e	11	327	1.62817	543.797	AGACCCCCACCTACCCCCCAATCACAGAAGAAGAGGAAGAAAGAGACTAGTTTTGAGTGAACTCAGTATG	0.471429	0.528571	1.46454	1.56924	0.104704	-6.1	0.573344
main_Cycs_chr6:50564458-50564528_20909	Mouse 3' UTR GCLiPP Peak	No	chr6:50564458-50564528	Cycs	23	795	1.49379	1212.95	TGGCACTCTTTGCTAACTTACTAGATGGAAAGATGGAAATAAAGGAAATAGTTTGTATCAGCAGAAAGAA	0.342857	0.657143	0.362085	0.685521	0.323437	-8.3	0.515969
main_Pafah1b1_chr11:74677562-74677632_4395	Mouse 3' UTR GCLiPP Peak	No	chr11:74677562-74677632	Pafah1b1	35	959	2.17039	2125.91	TGGATGCACTCTGATGATACCATGGTTACCCCATTTGAGCTCTGTTTAAATAAATATTGTCCTTTCATGT	0.371429	0.628571	2.47721	2.47721	0	-6	0.496565
main_S100a10_chr3:93564493-93564563_16460	Mouse 3' UTR GCLiPP Peak	No	chr3:93564493-93564563	S100a10	8	289	2.30502	680.395	TCAGGACCCTTAGGAAATGTGCAAATGAGATCCAACTCCAATTCAACAATCTGAGAGAGAAAACTTAATC	0.385714	0.614286	0.551634	0.726479	0.174845	-7.2	0.435613
main_Gatad2a_chr8:69908651-69908721_24194	Mouse 3' UTR GCLiPP Peak	No	chr8:69908651-69908721	Gatad2a	27	701	0.383979	274.924	CTGCGGACCACCGCCCTCTGCAGACACGCCCCCTGCCTCCTCCTAATAAAGGCTCATTTAACTCCATGCT	0.585714	0.414286	0.799394	1.1201	0.320704	-12	0.584826
main_Uqcrfs1_chr13:30540449-30540519_6970	Mouse 3' UTR GCLiPP Peak	No	chr13:30540449-30540519	Uqcrfs1	13	637	1.47629	960.506	CAGTCATAGACTTGAAAGGTGCAATGTCTTTGATAGCTAATTCTAATAAAACATTACAGATTGTTGTATT	0.3	0.7	0.411014	0.643014	0.232	-10.2	0.470951
main_Calm1_chr12:100207162-100207232_6479	Mouse 3' UTR GCLiPP Peak	No	chr12:100207162-100207232	Calm1	40	1776	0.793541	1439.46	CCATGACTCGGAGCCAGCAGAGTAGGCTGTGTCTGTGGACTTGAGCACACCATCAACATTGCTGTTCAGG	0.542857	0.457143	1.59434	1.63535	0.0410141	-18.9	0.529076
main_Calm1_chr12:100206576-100206646_6473	Mouse 3' UTR GCLiPP Peak	No	chr12:100206576-100206646	Calm1	60	2498	0.744789	1900.26	CCACACACAAAGTCTGCATGTATTGGTCGGTGGTCCTGCCCCTAAAGTCAAGCCCCTACATCAGTTTTAC	0.5	0.5	2.00048	2.00155	0.00107042	-11.3	0.487073
main_Hras_chr7:141190945-141191015_23725	Mouse 3' UTR GCLiPP Peak	No	chr7:141190945-141191015	Hras	26	1050	0.204759	219.594	CACCCAAGTCCTCCACCCCTCTCAGTTCCCTCCGGGCGCCTGCCTGTGAGGGCACACGTTGCATCACAGT	0.642857	0.357143	0.123352	0.73462	0.611268	-19.2	0.779483
main_Rmi2_chr16:10840286-10840356_9939	Mouse 3' UTR GCLiPP Peak	No	chr16:10840286-10840356	Rmi2	20	757	1.83937	1422.17	GGTTCTTCGAATGATAACACTTTCTCCTTGACCATACCTCTGAATTTCAGTTTGTTGCCAATGGATTAAA	0.371429	0.628571	0.119225	0.576465	0.457239	-5.8	0.641388
main_Ago2_chr15:73102518-73102588_8817	Mouse 3' UTR GCLiPP Peak	No	chr15:73102518-73102588	Ago2	28	1385	1.39831	1978.07	GCACTGATCTCTCAACAGTTTCCTTTATTGCGTCCAACTCCCCATCTGCTGTACTCATTTGAAGTGATTG	0.442857	0.557143	1.02349	1.17527	0.151775	-5.7	0.702325
main_Brd1_chr15:88688185-88688255_9424	Mouse 3' UTR GCLiPP Peak	No	chr15:88688185-88688255	Brd1	56	2611	2.4142	6438.24	CGGGAGCTCTGTCCATAGTGTTGATAAGCTGTACATGTTTGTATATTGTTCAGAACTTAACTTATTCTGG	0.385714	0.614286	1.05899	1.30656	0.247577	-11.9	0.507491
main_Cotl1_chr8:119810070-119810140_25056	Mouse 3' UTR GCLiPP Peak	No	chr8:119810070-119810140	Cotl1	29	860	0.444875	390.773	GCCACCAGTGTGTCCAACCCTCCCCTTCCCTCTCCCCCCTGTGGCCCCTCTCAAGCTCACCAAGCATCAT	0.628571	0.371429	0.246451	0.95893	0.712479	-7	0.563874
main_Mapk1ip1l_chr14:47319527-47319597_7949	Mouse 3' UTR GCLiPP Peak	No	chr14:47319527-47319597	Mapk1ip1l	52	2036	1.82592	3797.07	GAAAGAACTTTGCACCTCAGTTCCTGCTTCATGTGTTTGAATATGTAGAACATCACGTGGGTACAATCAG	0.414286	0.585714	1.34899	1.39648	0.047493	-9.8	0.565633
main_Ncln_chr10:81486462-81486532_2601	Mouse 3' UTR GCLiPP Peak	No	chr10:81486462-81486532	Ncln	12	292	0.527578	157.347	TGGGGATGGATGGCCCCTGGGGTGGCCGTGGGTCTGCAGTTGGTGGGTTACAAAATAAAAGCCATATTGA	0.542857	0.457143	0.210958	0.270028	0.0590704	-21.2	0.594466
main_Naa50_chr16:44159868-44159938_10364	Mouse 3' UTR GCLiPP Peak	No	chr16:44159868-44159938	Naa50	10	481	1.22831	603.45	TCTGTATAGTTTCACAGTTAAGATGTCCCGAAAATTGGGTGGCAGATGATTTCAAATTTTTAGCTGAATT	0.342857	0.657143	0.721845	0.818324	0.0964789	-12.1	0.416704
main_Ddx17_chr15:79529530-79529600_9109	Mouse 3' UTR GCLiPP Peak	No	chr15:79529530-79529600	Ddx17	74	4280	0.741627	3242.03	AGCCAAGAGGGATTTCCATGCACACTGCCCATGGTGGGTTTAAGTTACTGAAGTTCGATTACTCAGGCCT	0.485714	0.514286	0.219352	0.588535	0.369183	-15.9	0.499276
main_Rbpj_chr5:53653938-53654008_19217	Mouse 3' UTR GCLiPP Peak	No	chr5:53653938-53654008	Rbpj	26	1088	2.30749	2564.23	ACAAACCTAACATAGACTTATGGACCAAGGGACTCGCATAAGCTTTAGTGAAAGGTACATTTTCACCATG	0.4	0.6	2.02792	2.02885	0.000929577	-11.3	0.443944
main_Cks1b_chr3:89415830-89415900_16324	Mouse 3' UTR GCLiPP Peak	No	chr3:89415830-89415900	Cks1b	29	942	0.125798	121.036	CCGCCTTCCGGCCTCGAGCGGTCCACAGCTGTCCTCACTCCCTGCCATCTTTCTGATCGCGTGACCATGT	0.628571	0.371429	0.70262	0.958056	0.255437	-12.6	0.470237
main_Mis18a_chr16:90719388-90719458_10529	Mouse 3' UTR GCLiPP Peak	No	chr16:90719388-90719458	Mis18a	12	428	2.17939	952.725	GAGGCTACTCAACCGATAGTGCACTCTCTGGGTAAGATATTAGTGGACTGTATTTAGATTTAGATTTTCT	0.385714	0.614286	0.0875634	0.481338	0.393775	-13.3	0.479236
main_Msi2_chr11:88342702-88342772_4802	Mouse 3' UTR GCLiPP Peak	No	chr11:88342702-88342772	Msi2	2	28	1.33013	38.0398	TGTTACGTTTATAAATTTGGTACTTAAGGCACAGCCAGTGTGAGGCACTGAACGCGACATTTATTACAAT	0.385714	0.614286	2.05659	2.05724	0.000647887	-11.6	0.616737
main_Tmod3_chr9:75499833-75499903_26136	Mouse 3' UTR GCLiPP Peak	No	chr9:75499833-75499903	Tmod3	7	198	0.542921	109.797	TGAATGGTTTATGATGATTTTTAGGTAAAAATGCAGTTGTGGAAAGTTTCAGAAGTCGTGTATGTAAGAA	0.314286	0.685714	0.459704	0.785254	0.325549	-8	0.524431
main_H3f3a_chr1:180802577-180802647_1581	Mouse 3' UTR GCLiPP Peak	No	chr1:180802577-180802647	H3f3a	3	159	1.47995	240.343	CCTACATACAAGTACATGTTTTTAATGTTGTCAGTCTTCTGTGCTGTTCCTGTAAGTTTGCTATTAAAAT	0.328571	0.671429	2.18813	2.18813	0	-6.2	0.570878
main_Higd1a_chr9:121849531-121849601_26651	Mouse 3' UTR GCLiPP Peak	No	chr9:121849531-121849601	Higd1a	14	619	1.39752	883.562	GTTAGACGTCTCATATTGAGGTTACGTGTTTGTATCTACAATAAATAACATGTGGGTTTAGACAAAACAC	0.342857	0.657143	0.372127	0.790127	0.418	-13.9	0.603798
main_Appbp2_chr11:85190559-85190629_4726	Mouse 3' UTR GCLiPP Peak	No	chr11:85190559-85190629	Appbp2	4	332	1.3589	460.801	CAGATGAGAATTTTAGGTTTACTGTATGGTGTGTGGGGATTAAAAAGATGAATGCACACAAAAAGAAATC	0.342857	0.657143	0.431099	0.858141	0.427042	-10.3	0.528415
main_Impact_chr18:12991074-12991144_11962	Mouse 3' UTR GCLiPP Peak	No	chr18:12991074-12991144	Impact	25	925	1.59131	1503.44	GATAGTTTACGTGAAAACCCGAGTATTCATCTGTGATCATGTGCCAAAGTGATAGTTTACACATTTGCTA	0.371429	0.628571	0.730592	0.794338	0.0637465	-9.3	0.436299
main_Rab8a_chr8:72180541-72180611_24371	Mouse 3' UTR GCLiPP Peak	No	chr8:72180541-72180611	Rab8a	49	2968	0.903767	2739.73	GTTGTGGACAAGTGACAGCCATGTCCACTGTCTCCTTACGTGTCAAACCAAAGGGAAGCACAAACTAAGG	0.485714	0.514286	0.833789	1.29007	0.456282	-16.3	0.549771
main_Timm13_chr10:80899896-80899966_2492	Mouse 3' UTR GCLiPP Peak	No	chr10:80899896-80899966	Timm13	23	762	0.324359	252.446	CCCCACTGACCTGTGACCTCAGGAGAGCAGGCCAATAAATCGCTGCTGGGGCAGTAAAGCAGGCGTGTCA	0.585714	0.414286	0.0327324	0.598479	0.565746	-18.4	0.707765
rapidmain_Vapb_chr2:173779139-173779209_15762	Mouse 3' UTR GCLiPP Peak	Yes	chr2:173779139-173779209	Vapb	12	486	0.42148	209.219	AGCCTTGACCTGCCCTTCTCAGGATGAGTGAGTCAGGCTGCAGAGGGTGAAGGGCATAGAGGGGGTGGGG	0.614286	0.385714	-0.207718	0.858958	1.06668	-21.9	0.789171
main_Ubl5_chr9:20646680-20646750_25303	Mouse 3' UTR GCLiPP Peak	No	chr9:20646680-20646750	Ubl5	33	797	0.687138	559.359	CGCCCTGCTCTGCCCTGCCCTCCTCTCCCATCCTCATCTGACACTGGTGTAGATGGTCATTTTTAACAGT	0.542857	0.457143	0.0760423	0.630972	0.55493	-12.1	0.485592
main_Aes_chr10:81566084-81566154_2619	Mouse 3' UTR GCLiPP Peak	No	chr10:81566084-81566154	Aes	33	1127	0.311689	358.785	TGGCTCGGGACTGCAGTGGGGGTGGGCACCCCACAAACTTCCCTCCCCTCTTCCCCAAATAAACGTGAGG	0.614286	0.385714	0.234873	0.787915	0.553042	-21.5	0.617518
main_Lgals1_chr15:78930131-78930201_9038	Mouse 3' UTR GCLiPP Peak	No	chr15:78930131-78930201	Lgals1	36	855	0.634585	554.171	GGCCTTTGAGTGAAGCCAGCCAGCCTGTAGCCCTCAATAAAGGCAGCTGCCTCTGCTCCCCATAATCCAG	0.571429	0.428571	0.809127	1.15107	0.341944	-16.4	0.668008
main_Ppp1cb_chr5:32491752-32491822_19072	Mouse 3' UTR GCLiPP Peak	No	chr5:32491752-32491822	Ppp1cb	14	533	1.63889	892.207	TGCCACTGATTTGGATTTGTGCACTCTAATCTTTAATTTATTGATGCTCTATTGTGCAGTAGCATTTCAT	0.342857	0.657143	1.67759	1.67968	0.00208451	-9.8	0.449595
main_Gng5_chr3:146505405-146505475_17025	Mouse 3' UTR GCLiPP Peak	No	chr3:146505405-146505475	Gng5	46	1578	1.82699	2944.63	TCTTTAACACGTGCCATAATACACTATCTTCTGCTCGTCAGTCCTTAACATCTACCTCTCTGAATTTCAT	0.385714	0.614286	1.30221	1.39892	0.0967042	-2.7	0.517456
rapidmain_Srsf1_chr11:88052381-88052451_4793	Mouse 3' UTR GCLiPP Peak	Yes	chr11:88052381-88052451	Srsf1	7	309	1.42717	450.426	GAGATGTGTTTAGTAGATGCATTAAGGTTAGGTAGCTGTGTTACAGAACTCAAAGTACAACTAAAAGGAT	0.357143	0.642857	-0.395775	0.634479	1.03025	-11.1	0.511496
main_Rpl27a_chr7:109521702-109521772_23265	Mouse 3' UTR GCLiPP Peak	No	chr7:109521702-109521772	Rpl27a	20	907	1.20014	1111.8	GGAGGTGCCTGTGTTCTGGTGGCTTAAAAGCCACACCGGAGGTTTATTAAATGCTAACATTTTCCATGTG	0.457143	0.542857	1.08855	1.36446	0.275915	-16.4	0.594863
main_Zmat3_chr3:32337525-32337595_15965	Mouse 3' UTR GCLiPP Peak	No	chr3:32337525-32337595	Zmat3	34	1079	1.42068	1565.69	GAGCTGCCGTGTCAGTGTAGCTGAGTGAACACTAGCTGTGTAAATAGCTTCTCATGAGACATTTATATGG	0.442857	0.557143	0.533239	1.00431	0.47107	-18	0.549999
main_Cramp1l_chr17:24964101-24964171_10783	Mouse 3' UTR GCLiPP Peak	No	chr17:24964101-24964171	Cramp1l	53	3350	0.884344	3025.9	TAGTGCTTCCTACCCAAACCATCCAGAGGTGTGGTTCTGCCTGGCATGAGGAAGGGGGAAGAAATTTTGT	0.5	0.5	0.0118592	0.492085	0.480225	-19.2	0.721705
main_Sys1_chr2:164464847-164464917_15541	Mouse 3' UTR GCLiPP Peak	No	chr2:164464847-164464917	Sys1	1	50	0.0169289	0.864542	TGGAACCATGTCACATGAGCCATCATACTGTCACCAGCCTGTTATTTTAAAAAGAAAAAAAAAAAATCAA	0.328571	0.671429	1.00731	1.12041	0.113099	-3.9	0.506214
main_Txndc5_chr13:38501177-38501247_7068	Mouse 3' UTR GCLiPP Peak	No	chr13:38501177-38501247	Txndc5	53	2334	0.80909	1928.79	GTTGCATTGCCTGAGTTTTGGGAAGGAGGCCTGCGGCACTGTTGACTTAGTAAGGTGTCGGTCCATAGTG	0.528571	0.471429	0.0241831	0.598155	0.573972	-18.2	0.500735
main_Psmb6_chr11:70527591-70527661_4309	Mouse 3' UTR GCLiPP Peak	No	chr11:70527591-70527661	Psmb6	82	2819	1.13199	3259.32	TAGGGAGTAGTAAAGGATGGTCCATACCGACGCAGAAGCTAATAAACAGTTTGTTAAAGAGACGTTTCTG	0.414286	0.585714	0.327549	0.801606	0.474056	-10.7	0.612543
main_Magt1_chrX:105970738-105970808_27168	Mouse 3' UTR GCLiPP Peak	No	chrX:105970738-105970808	Magt1	1	25	0.507866	12.9681	AGATTTCTCATTCTGTTTCTAGTTTTATTTAAAGTAGCCCTTCTCTAACAATAATAGTTTCTTGCTAAAA	0.271429	0.728571	0.62869	0.848634	0.219944	-3.4	0.61704
main_Myl12b_chr17:70974071-70974141_11717	Mouse 3' UTR GCLiPP Peak	No	chr17:70974071-70974141	Myl12b	8	270	2.32929	642.355	TCTGTCACTTAGCATGTGCATAATCAGACTGGAACGGGGGACAATGTTGTAAATTGTACTGAAAACGAGA	0.414286	0.585714	1.27315	1.31761	0.0444507	-7.8	0.397763
main_Eri1_chr8:35469026-35469096_24089	Mouse 3' UTR GCLiPP Peak	No	chr8:35469026-35469096	Eri1	7	298	1.35772	413.251	GTAGCAGGCGAATGAATCTGAGTTAATGCAACCTTCAAGCACCTTAAACATTTAAGATCTTATTACAATT	0.342857	0.657143	0.803493	0.95	0.146507	-5.1	0.484767
main_Tardbp_chr4:148618162-148618232_18623	Mouse 3' UTR GCLiPP Peak	No	chr4:148618162-148618232	Tardbp	1	44	0.230848	10.3745	ATTAGGTTAGGTAGATTTAGAATGGTGGGATTCAAATTTTTCTAAACTCATGGTAAGTATATTGTAAAAT	0.271429	0.728571	1.45535	1.66062	0.205268	-9	0.464116
main_Pdcd5_chr7:35642063-35642133_22684	Mouse 3' UTR GCLiPP Peak	No	chr7:35642063-35642133	Pdcd5	36	1702	1.80429	3136.56	AGGACGCACTTAGACAGACTTCCGGAGCAGTGTCTAGGACAGTCACCACCTTGTAAATGTTTACTTTGTT	0.457143	0.542857	0.58169	0.871803	0.290113	-13.2	0.397856
main_Selt_chr3:58592373-58592443_16120	Mouse 3' UTR GCLiPP Peak	No	chr3:58592373-58592443	Selt	25	1315	2.24645	3017.25	GACAGGTCAAACTATGAAGGACAATGTCAAATCTAACTTTCTCCATGTATGCCTTAGGTTGAATTTGTTT	0.357143	0.642857	0.298028	0.586732	0.288704	-8.9	0.400527
main_Btg1_chr10:96619300-96619370_2776	Mouse 3' UTR GCLiPP Peak	No	chr10:96619300-96619370	Btg1	45	2297	1.20647	2830.51	CAACTGTGGTTGTTAGCACCAGCCAGCTCTCTGTACATTTGCTAGCTTGTAGTTTTCTAAGACTGAGTGG	0.457143	0.542857	2.06269	2.06269	0	-11.7	0.464401
main_Pbrm1_chr14:31118936-31119006_7812	Mouse 3' UTR GCLiPP Peak	No	chr14:31118936-31119006	Pbrm1	12	606	1.31576	814.399	GTGGAGCGGTAGCCATTTTAGTTACTGGGGTGGGAGGGAGGAACAAAGGATGATAATTTTTATTGCATTT	0.428571	0.571429	2.06115	2.06276	0.00160563	-8.9	0.712459
main_Szrd1_chr4:141115323-141115393_18535	Mouse 3' UTR GCLiPP Peak	No	chr4:141115323-141115393	Szrd1	16	494	1.17029	590.482	TGGGATTTCAAACCACAAATGAGAACTTCCCCACCCACCCCAAGTGCATGTCGCCATCACTTAAAAGTTC	0.471429	0.528571	1.81877	1.83041	0.0116338	-10.7	0.591864
main_Atp5a1_chr18:77782433-77782503_12508	Mouse 3' UTR GCLiPP Peak	No	chr18:77782433-77782503	Atp5a1	8	235	1.31469	315.558	AAAATCAGCACCATTTGTAAAGGGTTACTCTTGTATTCCTGATGTACAGAAATCACATGAATAAAAGTTC	0.328571	0.671429	0.959127	1.1358	0.176676	-9	0.376685
main_Egln3_chr12:54180564-54180634_6130	Mouse 3' UTR GCLiPP Peak	No	chr12:54180564-54180634	Egln3	20	804	0.899083	738.319	CTAAAGACTGACTGTGGTGTGCAATCCGCTGGCCGCATTCGTGTAGTAACAGTTCCGGAAATGTTAAGTG	0.485714	0.514286	0.639986	1.08717	0.447183	-14.3	0.572626
main_Zbtb7a_chr10:81149091-81149161_2523	Mouse 3' UTR GCLiPP Peak	No	chr10:81149091-81149161	Zbtb7a	22	754	1.8029	1388.45	CCCGTGTTCAGAGATTGAAAATTTGTCGTCACCCCACTCCCCACTTTTTAAGGCACTTTTTAGATCGATT	0.428571	0.571429	0.69307	1.13952	0.446451	-6.5	0.598272
main_Scd2_chr19:44303269-44303339_13345	Mouse 3' UTR GCLiPP Peak	No	chr19:44303269-44303339	Scd2	27	1157	1.7441	2061.07	CTGAGTATTGCCACCCAGATGCTAAAATGATGACTGACGTTAACCCATTCTGGTACAGTATTGTAAAACG	0.414286	0.585714	1.07034	1.20563	0.135296	-10.5	0.52687
main_Atic_chr1:71579340-71579410_471	Mouse 3' UTR GCLiPP Peak	No	chr1:71579340-71579410	Atic	40	1231	1.47354	1852.71	GGTCACTTAGCCTTAGGTTAGTTTTGCCTTCTTTCCAATCCTCTAAATAAATTTTAAAACTTTTTGGGTT	0.328571	0.671429	0.0686056	0.560803	0.492197	-7.9	0.524079
main_Csrnp1_chr9:119971329-119971399_26605	Mouse 3' UTR GCLiPP Peak	No	chr9:119971329-119971399	Csrnp1	42	1276	1.1549	1505.17	GGTGGCTCTTGAGAGCTCTTACGCCCTTCATTAGCTGATGTTGGATTTTATATGCATTTTTTTATTGTCT	0.385714	0.614286	0.464085	0.742225	0.278141	-10	0.608174
main_Atf6b_chr17:34654950-34655020_11214	Mouse 3' UTR GCLiPP Peak	No	chr17:34654950-34655020	Atf6b	84	4405	0.751134	3379.49	TCAAGGTGGGACTAGGTCCCCAGGTGGGACAAGGGATGGTTGTGGGTGGCAGAAGTCAGTTTATGTGTGT	0.542857	0.457143	0.666338	0.951239	0.284901	-13.8	0.56914
main_Mid1_chrX:169989333-169989403_27349	Mouse 3' UTR GCLiPP Peak	No	chrX:169989333-169989403	Mid1	53	2295	0.657976	1542.34	ACAGTCATCCCCCTGCCTCACACGGTCACTCAGGGTCATCCCCCTGCCTCAGAAAATCACTCACAATCAT	0.542857	0.457143	0.00904225	0.0459718	0.0369296	-8.7	0.541457
main_Pou2f1_chr1:165868867-165868937_1362	Mouse 3' UTR GCLiPP Peak	No	chr1:165868867-165868937	Pou2f1	17	770	2.09192	1645.22	ATCATTCTGACATTATGTAAGTAGTGTTAGTGCTGTGTGGTTTTTTCTAAGCGTTAGGTAGGTTTGTATG	0.357143	0.642857	0.530718	0.731423	0.200704	-12.8	0.667021
main_Med10_chr13:69815939-69816009_7420	Mouse 3' UTR GCLiPP Peak	No	chr13:69815939-69816009	Med10	26	1003	3.22881	3307.74	GGGGCTCCTACTTGACATTTCCTTTTTATGTATGCTGTTCTGTTACACTATCCATAAGAGAAAACTCGGT	0.4	0.6	0.0625915	0.571042	0.508451	-9.4	0.451759
main_Cds2_chr2:132306400-132306470_15054	Mouse 3' UTR GCLiPP Peak	No	chr2:132306400-132306470	Cds2	7	226	1.41573	326.797	ATATAGTATTCTCGAGATGAGCGTATGTGTGTCTGTTTAAAAGTCACCTTGTTTCCTACATGATTTTAGT	0.342857	0.657143	0.390197	0.682817	0.29262	-8.5	0.465404
main_Mnt_chr11:74844259-74844329_4406	Mouse 3' UTR GCLiPP Peak	No	chr11:74844259-74844329	Mnt	72	2244	0.579007	1327.07	GGGGTGCTGTGCTTCGGGGGTGCTGTGTCTCCTGCCTCTGCTTCTGCAGACCGCTTTGGCTTCTCTTTTT	0.585714	0.414286	0.355648	0.715225	0.359577	-20.1	0.661598
main_Grsf1_chr5:88660323-88660393_19368	Mouse 3' UTR GCLiPP Peak	No	chr5:88660323-88660393	Grsf1	84	5353	1.2767	6980.31	GGCAGCAACTGCTGGAGAAAGGATCTGTGCATCTTAGTGCTGTGTTTACACACAGAAAGATTCGGTTTGG	0.471429	0.528571	0.926944	1.05801	0.13107	-15.8	0.647373
main_Rbbp4_chr4:129309532-129309602_18007	Mouse 3' UTR GCLiPP Peak	No	chr4:129309532-129309602	Rbbp4	29	1274	1.78723	2325.62	TTGGTTGACCTGTCTCACCATCAGGCCTGTTACTCTCCATGACTAACTGTGTAAGTGCTTATAATGGAAT	0.428571	0.571429	1.73675	1.73942	0.00267606	-10.3	0.430469
main_Pptc7_chr5:122322164-122322234_19868	Mouse 3' UTR GCLiPP Peak	No	chr5:122322164-122322234	Pptc7	59	2607	0.890275	2370.57	TGCAGCCCTTCCTCTGCAGGAGACACTGGCTCCCTGGTTACTGCATTGAACTTGTGTTTGAGGTTACCTC	0.528571	0.471429	1.39756	1.56038	0.162817	-16.2	0.728247
main_Ugcg_chr4:59221374-59221444_17415	Mouse 3' UTR GCLiPP Peak	No	chr4:59221374-59221444	Ugcg	9	270	0.965572	266.279	AAAATGCATTTCAGACAGTCACACAGGAGCTATTTTCTTACCCGGGATGTCTGTATTGTTAATAAGAATG	0.371429	0.628571	2.04739	2.04739	0	-10.9	0.579907
main_Erp29_chr5:121444755-121444825_19828	Mouse 3' UTR GCLiPP Peak	No	chr5:121444755-121444825	Erp29	4	141	0.702368	101.151	CTATAGAGGTAGGGACTACTGCCAGGTCCTTGATGAGTGTAATTCTGATCAAATAAAAAGTCTGTTTTGG	0.4	0.6	0.790169	1.0178	0.227634	-13.5	0.650515
main_Cyhr1_chr15:76645788-76645858_8948	Mouse 3' UTR GCLiPP Peak	No	chr15:76645788-76645858	Cyhr1	12	233	0.32332	76.9442	GTGGCACGGTGGTTCCCTGGCCGGGCTCAGGGGCCCTGGCTGACTTCAGACAGCATATTTGATTGCAATT	0.585714	0.414286	0.614746	1.09675	0.482	-23.1	0.633721
main_Atp5g1_chr11:96072997-96073067_4912	Mouse 3' UTR GCLiPP Peak	No	chr11:96072997-96073067	Atp5g1	3	48	0.864078	42.3626	GACTCCATGCCAGTCCTGGTGCTGGAGTCTACTGAGCTTTACCATTAAACAACAACAACAACAACAACAA	0.442857	0.557143	0.742887	0.868296	0.125408	-15.8	0.634801
main_Mapk14_chr17:28746601-28746671_10955	Mouse 3' UTR GCLiPP Peak	No	chr17:28746601-28746671	Mapk14	4	163	1.67212	278.383	CAGGCCGATGGGAACTGTCATCTCCTTAGGGATGTGTGTGTTCAGTGCAAAGTAAGAAATATGAAAATAT	0.414286	0.585714	0.635296	0.778761	0.143465	-10.8	0.557626
main_Wasf2_chr4:133196151-133196221_18166	Mouse 3' UTR GCLiPP Peak	No	chr4:133196151-133196221	Wasf2	28	848	1.64098	1421.31	GTTTCAACTGGAGATAGTGCCTTCCCCTGATAACCATTTTAACCCATGGCCTTCGTCAAAACCCTTTCAT	0.442857	0.557143	0.345592	0.604803	0.259211	-7.3	0.620908
main_Ankrd13a_chr5:114804872-114804942_19629	Mouse 3' UTR GCLiPP Peak	No	chr5:114804872-114804942	Ankrd13a	64	2767	0.701138	1981.53	GCAGCATTGCCATTGTGCCAGTCCCATTTCCACCTCGTTCCATGCCTTTTACCCCCAGCCAAGAGGATAT	0.528571	0.471429	0.465789	0.723423	0.257634	-6.5	0.510522
main_Yy1_chr12:108816052-108816122_6606	Mouse 3' UTR GCLiPP Peak	No	chr12:108816052-108816122	Yy1	106	5134	2.54708	13356.3	TGTACACTTTTTGGGGATATGCTTAGTAATGCTGTGTGATTTTCTGGAGGTTGATAACTTTGCTTGCGGT	0.4	0.6	2.3827	2.39296	0.0102535	-9.6	0.459528
main_Fbxl14_chr6:119481803-119481873_21616	Mouse 3' UTR GCLiPP Peak	No	chr6:119481803-119481873	Fbxl14	1	11	1.46204	16.4263	AGATATTTTGAGATTGAAACATTTTTGTGCCTAGACTGGAAAGATGCCCACTGGGTTTGTATCTGTTTTT	0.357143	0.642857	1.45858	1.52846	0.0698873	-12.8	0.395167
main_Eif3j2_chr2:122053561-122053631_14915	Mouse 3' UTR GCLiPP Peak	No	chr2:122053561-122053631	Eif3j2	9	320	2.34094	765.12	TCTAACTCATGAAAATGTATCACGTGTTCCTTAACTGTGTAAATAAGATTAAATTGCTTTGAAACTGGAA	0.3	0.7	1.97821	1.97821	0	-2.5	0.538423
main_Matr3_chr18:35590941-35591011_12106	Mouse 3' UTR GCLiPP Peak	No	chr18:35590941-35591011	Matr3	10	445	1.53121	695.956	TGCAGGTGCAGTTTTCTTTTAATGTCATGCTGTTTAGATGATAAGAAATATTAAGAATTGGCTTTAGATT	0.3	0.7	1.69327	1.69873	0.00546479	-8.6	0.407428
main_Sigmar1_chr4:41739470-41739540_17284	Mouse 3' UTR GCLiPP Peak	No	chr4:41739470-41739540	Sigmar1	67	2478	0.641493	1623.61	GGAGTGGGGACCAAACACGTGGATGGTGGAGTACGGCCGGGGTGTTATTCCGTCTACCCTGTTCTTTGCA	0.571429	0.428571	1.49842	1.90786	0.409437	-17.5	0.451724
main_Arpc1b_chr5:145127890-145127960_20442	Mouse 3' UTR GCLiPP Peak	No	chr5:145127890-145127960	Arpc1b	8	386	1.00214	395.096	AGCTGCTGGGAGGGAGGGAAAGGGGGTCGGGGAGGCTAAGGGCTGCTTTGCTAAATGTTTCTAGGATGCA	0.571429	0.428571	0.213014	0.789887	0.576873	-20.8	0.548974
main_Lrrc47_chr4:154020338-154020408_18772	Mouse 3' UTR GCLiPP Peak	No	chr4:154020338-154020408	Lrrc47	131	7689	1.2335	9687.19	GGGGTCTGTGTGGGTATAGGTGTGGGTGTGCTGTAGATTCTGTGTAACTGGTTCTTTGCTGTTTCTCTGG	0.5	0.5	0.0152958	0.289606	0.27431	-10.2	0.517806
main_Stx16_chr2:174098328-174098398_15771	Mouse 3' UTR GCLiPP Peak	No	chr2:174098328-174098398	Stx16	6	224	2.3315	533.422	CTGGAGTTAGAGTGATTGTTGTATAACTGTTGACGGCTTGAAAAAACTCTCTGTGTCTCTTAAATTATTT	0.342857	0.657143	0.276437	0.561	0.284563	-7.4	0.501518
main_Haus2_chr2:120619148-120619218_14884	Mouse 3' UTR GCLiPP Peak	No	chr2:120619148-120619218	Haus2	29	1121	2.25013	2576.34	AAGGCTCACACCGAAACCTCCAGGGCCAAGTGATGTCATCTTTACTTTGGATTAATTACATGTAGTCAAA	0.414286	0.585714	0.464324	0.739817	0.275493	-12.8	0.596416
main_Ube2b_chr11:51986499-51986569_3788	Mouse 3' UTR GCLiPP Peak	No	chr11:51986499-51986569	Ube2b	8	387	2.44528	966.558	GAAAAAGTCCTTCAGTTTAGAACCTACAAAAGCTTGTGTATCTTGATTAATGTACTTTTTATTGCATGGT	0.314286	0.685714	2.51499	2.51515	0.000169014	-8.2	0.375952
main_Znrf2_chr6:54888883-54888953_20933	Mouse 3' UTR GCLiPP Peak	No	chr6:54888883-54888953	Znrf2	4	108	1.52046	167.721	TTCACCTATTCTTAACTTGAAAACCACACAATTTCTTTCTTACAAAGTCTTCAACATGAACCAAGAAAAT	0.3	0.7	1.15561	1.17507	0.0194648	-1.9	0.56824
main_Hmgn1_chr16:96121838-96121908_10586	Mouse 3' UTR GCLiPP Peak	No	chr16:96121838-96121908	Hmgn1	11	523	1.0536	562.817	ATTTTCCTAACAGTTGTGATAATGTGCTGTGAAAGATGGAAGTCCTGAGTCTGTTCTGTGTGTGGCGTAA	0.414286	0.585714	0.440282	0.662986	0.222704	-7.1	0.450691
main_Arf3_chr15:98738584-98738654_9587	Mouse 3' UTR GCLiPP Peak	No	chr15:98738584-98738654	Arf3	153	8689	0.901873	8003.93	AGCGTGTGCTCTAGACCTGGTGTGTGTGAGTGTGTGTGTGTGTGTGTGTGTGTGTGTAAGTGTGAGTGTG	0.514286	0.485714	-0.0645493	0.586493	0.651042	-5	0.480774
main_Tcea1_chr1:4896439-4896509_6	Mouse 3' UTR GCLiPP Peak	No	chr1:4896439-4896509	Tcea1	36	2196	1.85015	4149.8	CAACTCGTTTCCTTGCAAGTGAAATTTGTAAACAACATACATCTCATGGGTTGGTCTTTGTTGTTCACCT	0.385714	0.614286	0.935338	0.984239	0.0489014	-9.7	0.418193
main_Thrap3_chr4:126165092-126165162_17909	Mouse 3' UTR GCLiPP Peak	No	chr4:126165092-126165162	Thrap3	31	1202	0.761236	934.57	GGTGGTGTGGGGGGTGGGCAGGGTAGGGAGAAGGATGCTGATGCTTGGACTTTGTTTTGGTTTTGTTGTC	0.542857	0.457143	0.837718	0.984141	0.146423	-10.5	0.592925
main_Polr3k_chr2:181868507-181868577_15897	Mouse 3' UTR GCLiPP Peak	No	chr2:181868507-181868577	Polr3k	38	1467	2.53702	3801.39	AGGATGCTCACTTGGGTTCAGGTCCTGTTCCTTACCATTCAAACTAGGAACTTGGTTTATAGTCAGTAAA	0.414286	0.585714	-0.0614507	0.560268	0.621718	-13	0.487156
main_Mrpl34_chr8:71465652-71465722_24323	Mouse 3' UTR GCLiPP Peak	No	chr8:71465652-71465722	Mrpl34	49	2389	0.66858	1631.39	TTTGCAAGACGGGGTCATTAAAACACAGACACCACCCCTACGTTTCCAGCCATTCCAAAGTATTACCGAC	0.471429	0.528571	0.14169	0.242535	0.100845	-7.2	0.519269
main_Nucks1_chr1:131931763-131931833_921	Mouse 3' UTR GCLiPP Peak	No	chr1:131931763-131931833	Nucks1	8	198	0.786594	159.076	GCTATGGAAACTGCTTCTTGCTAGAGAACAGCAACTTGAACAATAATCAAAAACAAAAAACTAGAAAGGT	0.342857	0.657143	0.809394	1.10841	0.299014	-5.9	0.46699
main_Nusap1_chr2:119648963-119649033_14840	Mouse 3' UTR GCLiPP Peak	No	chr2:119648963-119649033	Nusap1	31	895	2.79374	2553.86	ACCTGGGTGTGACTAAAGCCCAGTGACCCTGTCTGTTCCTTTACTCTAACTTGTTTTCCTTTTGTATGTT	0.428571	0.571429	0.282986	0.71507	0.432085	-9.2	0.511455
main_Tpm4_chr8:72151934-72152004_24350	Mouse 3' UTR GCLiPP Peak	No	chr8:72151934-72152004	Tpm4	6	312	1.31307	418.438	ATGCCAAGCAGATAATGAATTCATGACCAAATATTTTGTGTTAGACAAGCTTTGAGCACCAGTTAAGTTT	0.342857	0.657143	1.21482	1.28358	0.0687606	-6.6	0.516045
main_Srsf1_chr11:88051316-88051386_4792	Mouse 3' UTR GCLiPP Peak	No	chr11:88051316-88051386	Srsf1	6	194	2.04194	404.606	TCAGCACGAGTAGATGGTAAACATTTAAAGGGGAAAAGGGGGGGTTTGTTTAAAATAGTAAATCAGTAAG	0.371429	0.628571	2.36215	2.36376	0.00160563	-5.8	0.394246
main_Purb_chr11:6470728-6470798_3375	Mouse 3' UTR GCLiPP Peak	No	chr11:6470728-6470798	Purb	57	3166	1.46751	4745.47	TCAGTGAGAAGGGGAAGAAGTGACTTAGACTTGTGTTAAGATGACCTGTTGGCTGAGAGTGGTCGTTCTG	0.471429	0.528571	0.868056	1.08651	0.218451	-12.2	0.505332
main_Snrpd1_chr18:10627841-10627911_11946	Mouse 3' UTR GCLiPP Peak	No	chr18:10627841-10627911	Snrpd1	10	412	1.25323	527.371	GCAGAGGAAGAGGGGGTCCTAGGCGATAATGTCTCTCAAGATTACTGTTTCAAATTGATAAGGAATTTGG	0.428571	0.571429	0.996282	1.26442	0.268141	-11.1	0.368174
main_Etf1_chr18:34904728-34904798_12086	Mouse 3' UTR GCLiPP Peak	No	chr18:34904728-34904798	Etf1	10	327	1.06647	356.191	GTGTCAGCGCAGCAGCCGACAACTAAGTCTCTAAAGGCCACTGTGGACTCATTTAAAAAGAATCCCAGTT	0.471429	0.528571	2.25555	2.26828	0.0127324	-15.8	0.395123
main_Srsf1_chr11:88049852-88049922_4781	Mouse 3' UTR GCLiPP Peak	No	chr11:88049852-88049922	Srsf1	9	514	2.48334	1303.73	GTGATATTATGTAAATGTCTATTCTGCTCTGGTTTGTGTGAAATGGGATGTTGGGGGTGTTTGTGGTTAT	0.385714	0.614286	1.80792	1.80896	0.00104225	-10.8	0.404909
rapidmain_Rpl39_chrX:37082586-37082656_26850	Mouse 3' UTR GCLiPP Peak	Yes	chrX:37082586-37082656	Rpl39	26	813	1.98336	1646.95	TCAATCAGTCCTACCAGATGGATTTCAACATTTAAACCTGGAGACTCTTCGTGTCTTGAATTAGGATGTT	0.385714	0.614286	-0.45438	0.791648	1.24603	-12.7	0.525104
main_Tpd52_chr3:8930510-8930580_15901	Mouse 3' UTR GCLiPP Peak	No	chr3:8930510-8930580	Tpd52	18	753	1.43772	1105.75	TTCTGTGAGGACCATATCTTGGGTTTCTAAAGACACCAGACTAAAGTAGACAGGTGTGTATGCAGTTCTA	0.414286	0.585714	0.372634	0.601197	0.228563	-12.6	0.439212
main_Prelid1_chr13:55325159-55325229_7273	Mouse 3' UTR GCLiPP Peak	No	chr13:55325159-55325229	Prelid1	15	545	1.56864	873.187	TACGCTCCAAGAGGGCAGGGCTCCTTGTTTTATTCTCTGCTGTGTCCCAAGTACCCTGAACAATATTTAG	0.471429	0.528571	0.614817	0.935859	0.321042	-12.7	0.557433
main_Ost4_chr5:30906654-30906724_19019	Mouse 3' UTR GCLiPP Peak	No	chr5:30906654-30906724	Ost4	50	1695	1.03521	1792.2	CCTTCACACTTCACTTCATCTCTCCTACCCATCACAGCATACAAAGCAACTACACCTGGATTTTTCCAAA	0.428571	0.571429	2.12976	2.1459	0.0161408	-4.3	0.533971
main_Tceb2_chr17:23824800-23824870_10717	Mouse 3' UTR GCLiPP Peak	No	chr17:23824800-23824870	Tceb2	7	269	0.657646	180.689	GTGAGGGCCTAGGCCTACCCCCTAGAGACCCATTTCCCCAATAAAAAAAATTTGGCTGTCTACCTGATTG	0.485714	0.514286	0.597239	0.991577	0.394338	-12.6	0.550008
main_Snx5_chr2:144251132-144251202_15093	Mouse 3' UTR GCLiPP Peak	No	chr2:144251132-144251202	Snx5	51	2551	1.47024	3830.79	GACTTATTCAAGAACAACTGACCTGTCTACTCTGAAGGACACCAATGTGAAAGCCAGCATCACTTGCACT	0.442857	0.557143	1.41693	1.5289	0.111972	-6.6	0.377054
main_Actr2_chr11:20064338-20064408_3461	Mouse 3' UTR GCLiPP Peak	No	chr11:20064338-20064408	Actr2	51	3241	1.9235	6367.35	AACTGCTTGTAGGCTTCCAATTTTTGCTTTCTTGCTCTAATGCTGCTAGCTTTAGTTTTAGCACAGTAGG	0.4	0.6	1.18642	1.28104	0.0946197	-13.1	0.411369
main_Eif4b_chr15:102095641-102095711_9732	Mouse 3' UTR GCLiPP Peak	No	chr15:102095641-102095711	Eif4b	18	729	2.10972	1570.87	GAGGCAGTCACATCAGTTAGGCAGTAGAAAAAGGTGCAAAGCAGAAGTGAGATTTCTACTTTCTAATTCT	0.4	0.6	0.489479	0.866521	0.377042	-11.9	0.514115
main_Rpl36al_chr12:69182769-69182839_6183	Mouse 3' UTR GCLiPP Peak	No	chr12:69182769-69182839	Rpl36al	5	207	1.0509	222.187	AAGGGCCAAGTGATCCAGTTCTAAAACTTGTGTTCTCTGAGAGGAAAATACTGAAGCAGTAGAGAAATGA	0.4	0.6	0.769113	1.08103	0.311915	-10.8	0.461735
main_Dnajc8_chr4:132553165-132553235_18152	Mouse 3' UTR GCLiPP Peak	No	chr4:132553165-132553235	Dnajc8	50	2696	0.798407	2198.53	CTCCTCCTGCTTCACGGACTCATTCTCTCTCCACCTCCACCCCACCAGAGAGTAGCGATTGCTTTTTAGT	0.528571	0.471429	1.30638	1.40666	0.100282	-8.1	0.494162
main_Hspe1_chr1:55091163-55091233_268	Mouse 3' UTR GCLiPP Peak	No	chr1:55091163-55091233	Hspe1	2	85	0.806611	70.0279	ATGTCTGAACTATTTCATCATGTAAATAATTTCCATGCCTCCCTTTTATAATAAACAGATGATGCCTAAA	0.3	0.7	1.37176	1.4548	0.0830423	-3.67	0.381947
main_Irf2bpl_chr12:86881338-86881408_6412	Mouse 3' UTR GCLiPP Peak	No	chr12:86881338-86881408	Irf2bpl	1	20	1.48128	30.259	TCTATATTTTGAAACAGGTATGTAACTTCTTCATTTGAAGGATAAGCTGGTTTGTGTTAAGCAGTATAAT	0.3	0.7	1.94063	1.94063	0	-10.3	0.462456
main_Aldh9a1_chr1:167368213-167368283_1384	Mouse 3' UTR GCLiPP Peak	No	chr1:167368213-167368283	Aldh9a1	6	197	1.32767	267.143	GACTTCAGGTTTATCTCTAGAACCCACCCCTTCCCCATATCATACACTGCACAATAATAAAATCTTTCTC	0.4	0.6	0.0193099	0.426606	0.407296	-3.2	0.554772
main_Mapre1_chr2:153768170-153768240_15283	Mouse 3' UTR GCLiPP Peak	No	chr2:153768170-153768240	Mapre1	63	2487	2.4682	6269.66	AACTCTGCAAAATGTGTTACCCACTACTGAGATTGTTCAGCCCCTGATGTGTTTGTACTGATTTGTTTCT	0.4	0.6	1.45746	1.45994	0.00247887	-6.1	0.43914
main_Urm1_chr2:29843358-29843428_13939	Mouse 3' UTR GCLiPP Peak	No	chr2:29843358-29843428	Urm1	9	194	0.427585	84.7251	GGGAGAGCGAAGAGAGAGAGCAGCCGCCTGAGTCCAGCACTCCTCCCAGCAGCTGAGGTGGGGGAGGGTG	0.671429	0.328571	0.54731	0.80362	0.25631	-21.7	0.57995
main_Abhd10_chr16:45731370-45731440_10396	Mouse 3' UTR GCLiPP Peak	No	chr16:45731370-45731440	Abhd10	1	25	2.33618	59.6534	TGCTCTTTGGAAATTTTTGTCCTCCTTTTATATTTTCCCATTAAAGTAGCACCTATTTTTTATTAAAGAG	0.285714	0.714286	0.544465	0.883085	0.33862	-7.5	0.48381
main_Ssbp3_chr4:107048271-107048341_17615	Mouse 3' UTR GCLiPP Peak	No	chr4:107048271-107048341	Ssbp3	40	1753	1.22017	2184.7	GTCAACGGCCAGAAAACTCTCACCTTCTTCCCGCCCAAAAGGACCTTTCTGTACATGACACTTTTTGTTG	0.471429	0.528571	0.993352	1.09177	0.0984225	-9.1	0.546705
main_Wasf2_chr4:133196819-133196889_18167	Mouse 3' UTR GCLiPP Peak	No	chr4:133196819-133196889	Wasf2	37	1262	0.354138	456.478	TCTGGGCAGAGCAGCCTGGCTCCCTTCTACCCCAGAGCTCCCAAATGCCGGCCTTGCATTTGGAGGGTTC	0.614286	0.385714	0.293324	0.640085	0.346761	-26.4	0.585626
main_Grpel1_chr5:36471618-36471688_19159	Mouse 3' UTR GCLiPP Peak	No	chr5:36471618-36471688	Grpel1	20	534	1.52487	831.689	CTCGGGAGTAGTATGCTAACATTGTATCTGTTCCACCTGGTGATTAGTACTTTACACAAATAAAAGGTCT	0.385714	0.614286	0.136915	0.645085	0.508169	-11.5	0.718975
main_Ccna2_chr3:36565427-36565497_16023	Mouse 3' UTR GCLiPP Peak	No	chr3:36565427-36565497	Ccna2	73	3350	1.00638	3443.47	GTTCTCTTCTTCTTCTTCCTTTTCCCTTGGCCTTTACTTGGTGCCTTCTGGTTTGCACTGGTCTGAGCTC	0.485714	0.514286	1.56165	1.57435	0.0127042	-8	0.313394
main_Asrgl1_chr19:9112940-9113010_13028	Mouse 3' UTR GCLiPP Peak	No	chr19:9112940-9113010	Asrgl1	27	1128	1.28918	1485.28	TACCTTGCTAGCCTGGACGTGAAGCTGAGCTACCTGGTGTGAAGACCTAACTTAATCAATTAGATGTAGA	0.442857	0.557143	0.430141	0.798845	0.368704	-10	0.564125
cd8_Basp1_chr15:25364030-25364100_4122	Mouse 3' UTR GCLiPP Peak	No	chr15:25364030-25364100	Basp1	2	40	1.79869	73.4861	AGGATATGTATTGCCCAAGGGATTAAATAAACAAAAGAAAAGAAAAGAGAAAAAAAATAAAGAGGATGTG	0.285714	0.714286	0.368197	0.80538	0.437183	-1.7	0.45101
main_Arf6_chr12:69375020-69375090_6199	Mouse 3' UTR GCLiPP Peak	No	chr12:69375020-69375090	Arf6	12	426	2.20552	959.642	AAGCAGGAGGCTATACAAAAATGAGCTGTAAGTAAAACATTTAACCTAAAGCAGATGAGAAAAGGTGCTA	0.357143	0.642857	0.942606	1.08987	0.147268	-5.6	0.531423
main_Cks1brt_chr8:85172175-85172245_24586	Mouse 3' UTR GCLiPP Peak	No	chr8:85172175-85172245	Cks1brt	10	432	1.07765	475.498	TGTATTGGAAACTTTGCATTTTATCTGACAGATCTCTTCCATGTTACAAGCCTTGATTAAAGGAAGTTTT	0.328571	0.671429	0.762183	0.837563	0.0753803	-9.7	0.485033
main_Metrn_chr17:25794924-25794994_10795	Mouse 3' UTR GCLiPP Peak	No	chr17:25794924-25794994	Metrn	50	2122	0.506988	1098.83	GTGAGATGGCACTGGACTGAGAGACCTGGGAGCAAGCCCTGGATGGACCTTCTTCTGGAGATGGGGTGTT	0.571429	0.428571	0.0154507	0.801535	0.786085	-13.3	0.627572
main_Hmga1-rs1_chr17:27563262-27563332_10882	Mouse 3' UTR GCLiPP Peak	No	chr17:27563262-27563332	Hmga1-rs1	63	3435	1.66406	5838.25	CTGGTTCCATCTTCTCCTCTGTTCACAAACTACCTCTGGACGGTTGTGTTGTTTTGTTTTTGTTCCATGT	0.428571	0.571429	1.55127	1.58961	0.038338	-6	0.563535
main_M6pr_chr6:122316910-122316980_21659	Mouse 3' UTR GCLiPP Peak	No	chr6:122316910-122316980	M6pr	25	666	2.14153	1456.75	AAAAATGTGAAATTCCCCAACTACAGAATTCTAAGGTACCATCACGTTGTGTATAGGTCTTTAAGTGGCT	0.371429	0.628571	0.363225	0.579225	0.216	-7.1	0.400783
main_Rap1b_chr10:117815616-117815686_2919	Mouse 3' UTR GCLiPP Peak	No	chr10:117815616-117815686	Rap1b	27	1256	1.47723	1895.08	GAGAGGCGGATGAAAGCTACTCTGTCAGTTTGCACATTCTAATCACTTTCCAGTATCACGAGAGATTTTT	0.414286	0.585714	2.2882	2.29377	0.00557746	-8.9	0.492249
main_Ubfd1_chr7:122079198-122079268_23369	Mouse 3' UTR GCLiPP Peak	No	chr7:122079198-122079268	Ubfd1	1	12	1.26967	15.5618	TTGTTTTTTTATTATTTCCCTATGATTTCGTTTTAATCCCAAAGATGCCAGTTTCTCTTTTGGTACCTCA	0.314286	0.685714	1.03475	1.21266	0.177915	-6.2	0.502942
main_Eif4a2_chr16:23112487-23112557_10152	Mouse 3' UTR GCLiPP Peak	No	chr16:23112487-23112557	Eif4a2	4	205	1.31302	274.924	ATGATTATTTGATATTTTAAGTTGTTCCAGCCCAAGGCATTTTGTATGTTAGCATTTCTGATAGGGAGTG	0.342857	0.657143	1.03751	1.23939	0.201887	-8.9	0.464089
main_Arpc4_chr6:113388962-113389032_21532	Mouse 3' UTR GCLiPP Peak	No	chr6:113388962-113389032	Arpc4	27	1157	0.498209	588.753	CCTGCCCCATAGCCACATGTGTCTGCTCTGGCTAGTTTCTGATGCTCAGTCCCCTGGACCGGGACAGACT	0.585714	0.414286	1.29973	1.49807	0.198338	-20.5	0.589451
main_Rab5c_chr11:100715273-100715343_5199	Mouse 3' UTR GCLiPP Peak	No	chr11:100715273-100715343	Rab5c	4	135	1.34177	185.012	TATTTTGTATTGTATGTTTTCTTCACCATGTAACCAATCAGTATCTTGTCAATATAGTCAGCCGATCGAT	0.328571	0.671429	2.20675	2.2112	0.0044507	-2.4	0.376757
main_Ago2_chr15:73102956-73103026_8820	Mouse 3' UTR GCLiPP Peak	No	chr15:73102956-73103026	Ago2	43	1324	0.357373	483.279	TGGGGACCCCTGAGTGTCCAGGAGGCCTTAGGGCTGGGTGGCCTCTCTTGGTAGTCCCTGTGGTGGTAGC	0.642857	0.357143	-0.0850986	0.84369	0.928789	-27	0.759775
main_Papola_chr12:105837629-105837699_6561	Mouse 3' UTR GCLiPP Peak	No	chr12:105837629-105837699	Papola	55	2299	1.06772	2507.17	AGCTTTCGCAAGCTCTGTTCTTTTGCCTTCAGTCTGTTAGTCTTCAGAAAGACAGTGCTCCCCCACCCCC	0.514286	0.485714	0.503493	0.846986	0.343493	-11.3	0.550871
main_Ssr3_chr3:65381859-65381929_16161	Mouse 3' UTR GCLiPP Peak	No	chr3:65381859-65381929	Ssr3	30	1212	1.36325	1687.59	GGCCTGTGGTATATGGGAAAGCATCAGGGTGGCCAGGTTGGGAGACACATAAGTTGTTTTTATAGTCTGG	0.485714	0.514286	0.808901	0.989662	0.180761	-13.8	0.607792
main_Got2_chr8:95864899-95864969_24686	Mouse 3' UTR GCLiPP Peak	No	chr8:95864899-95864969	Got2	24	997	0.86597	881.833	GCAGAGGCTTCCTCGGCTGGTATCTGGAACTTCGTCGGCTCTAAACCAAACTCCCTCATCCTTTTGTCTC	0.528571	0.471429	0.859085	1.0979	0.238817	-11.7	0.591023
main_Pfdn5_chr15:102331394-102331464_9765	Mouse 3' UTR GCLiPP Peak	No	chr15:102331394-102331464	Pfdn5	27	1057	0.619017	668.291	GGGCCTGGGACTTTTTCCGGCAATGGCCTCCTGGGAAAGTGGCCTGGGAAGAGAGTGTTTTGTGTTTAAT	0.528571	0.471429	0.257704	0.77131	0.513606	-17.5	0.54237
main_Tpm3_chr3:90100516-90100586_16393	Mouse 3' UTR GCLiPP Peak	No	chr3:90100516-90100586	Tpm3	1	12	0.423222	5.18725	TGTGCTTTGTATCAGTCAGTGCTGGAGAAATCTTGAATAGCTTATGTGTAAAAAAACAAAAAACAAAAAA	0.3	0.7	1.01262	1.01468	0.00205634	-6.3	0.417299
main_Mt1_chr8:94180182-94180252_24634	Mouse 3' UTR GCLiPP Peak	No	chr8:94180182-94180252	Mt1	38	1348	0.581459	800.566	GCTGTGCCTGATGTGACGAACAGCGCTGCCACCACGTGTAAATAGTATCGGACCAACCCAGCGTCTTCCT	0.557143	0.442857	-0.0254366	0.90307	0.928507	-10.1	0.466912
main_Nutf2_chr8:105879069-105879139_24737	Mouse 3' UTR GCLiPP Peak	No	chr8:105879069-105879139	Nutf2	63	3198	0.89885	2935.98	TTTGGATGCTAGACTAGTCGCATCTGACAGGAAGTTTGTGTTGTACCAGCGCATGCCTTGGAAAGACTTA	0.457143	0.542857	2.10859	2.20513	0.0965352	-17.5	0.44852
main_Smim14_chr5:65450213-65450283_19283	Mouse 3' UTR GCLiPP Peak	No	chr5:65450213-65450283	Smim14	39	2222	1.22548	2781.23	CTAGAAATTTCACTTGCCAACTGCCTTTTGCTTCCTGAGTTGCCACCGTCCTTATTTACAGTATCCCTGA	0.442857	0.557143	1.40558	1.41268	0.00709859	-4.3	0.59896
main_Hmgn1_chr16:96121652-96121722_10584	Mouse 3' UTR GCLiPP Peak	No	chr16:96121652-96121722	Hmgn1	88	5069	2.01767	10446.3	TGTGTACATGAACACAATGTGACTTCAGAGTTTGGGTACGTGAACACAGTATATGGCTCTTTTTGGGTAC	0.414286	0.585714	0.133169	0.442859	0.30969	-14.2	0.429338
main_Ube2e3_chr2:78920435-78920505_14450	Mouse 3' UTR GCLiPP Peak	No	chr2:78920435-78920505	Ube2e3	13	473	2.44985	1183.56	CCCAGATCTATTTCTGAGTATGTGGTTCATGCTGTTGTGAAATGTTTTACCTTTGTCAGTTTGTAATGAG	0.371429	0.628571	2.34514	2.34514	0	-10.9	0.501801
main_Sec61a1_chr6:88504834-88504904_21346	Mouse 3' UTR GCLiPP Peak	No	chr6:88504834-88504904	Sec61a1	11	415	1.80915	766.849	CAAAAAACCAGTAGAAGTGAATTGTTAGCTGATGGCCAGGGGGTGTGATAACAAATTGTCCTCAAGTATC	0.414286	0.585714	0.0403099	0.579831	0.539521	-7.9	0.532898
main_Chtop_chr3:90499574-90499644_16445	Mouse 3' UTR GCLiPP Peak	No	chr3:90499574-90499644	Chtop	62	3496	2.0488	7315.75	TTGAACAGGAATGCGTTGGCCTTGTGAGTAGAACAGTTTTCTAGCCTCTGCCTGTCATATACTCTTGACA	0.442857	0.557143	0.545408	0.767887	0.222479	-13.1	0.459197
main_Scd2_chr19:44303464-44303534_13348	Mouse 3' UTR GCLiPP Peak	No	chr19:44303464-44303534	Scd2	94	3487	0.726529	2587.57	GCCAGCCGCCGCTCAGCTATAGGTCAGTGTTCACCTTCCAGAGTACACCAACTTCTCAAGGGTCTACAGT	0.542857	0.457143	0.207507	0.584606	0.377099	-11.5	0.545822
main_Ccnd2_chr6:127128387-127128457_21848	Mouse 3' UTR GCLiPP Peak	No	chr6:127128387-127128457	Ccnd2	47	2299	0.643945	1512.08	ACTGGAAAAGCCTTTTCCTCTGTCCCTGTCCTTCTGGTAGCATCGATGGGCTGCGTTGCGTTTGGTTCCG	0.542857	0.457143	0.571127	0.897352	0.326225	-11.6	0.660422
main_Mtch2_chr2:90865289-90865359_14526	Mouse 3' UTR GCLiPP Peak	No	chr2:90865289-90865359	Mtch2	39	1304	2.15441	2869.42	TGACATTTCTATAGTCCCAATGCACAGAATTATGGGAGAGAATGTTGATTTCTATACAGTGTGGCACGCT	0.4	0.6	1.77831	1.8007	0.0223944	-10.8	0.442127
main_Nxf1_chr19:8765761-8765831_12958	Mouse 3' UTR GCLiPP Peak	No	chr19:8765761-8765831	Nxf1	16	433	0.127064	56.1952	ATGACCCTGTCGGGCACAGCCCCTCCCTCACTCGCACACCTCACAGTCACCCTGCTTGGCCCCGAGGATG	0.657143	0.342857	0.894211	1.18765	0.293437	-14.2	0.684444
main_Cox7a2_chr9:79755409-79755479_26155	Mouse 3' UTR GCLiPP Peak	No	chr9:79755409-79755479	Cox7a2	11	376	1.98104	760.797	AACTGAGCTCTTCTTTGGGGATCAATATTTATTGATGTGTATTAACTGCTGCCAATAAAGCAATCCTTAA	0.342857	0.657143	1.4732	1.49903	0.025831	-10.3	0.612957
main_Tardbp_chr4:148614986-148615056_18605	Mouse 3' UTR GCLiPP Peak	No	chr4:148614986-148615056	Tardbp	7	301	1.31325	403.741	TTAAGGTTTTTGGAATGATTTGCTAAATTGCCCTTGTAAAGGGTAAAATGCTGTTTCGTGTTCTTTTTAT	0.314286	0.685714	0.191803	0.516986	0.325183	-12.8	0.574428
main_Taf13_chr3:108581811-108581881_16827	Mouse 3' UTR GCLiPP Peak	No	chr3:108581811-108581881	Taf13	54	2755	1.18318	3329.35	TGTGAGAACGGAGAGTTGATTAAATCTGTATGTGGCTGTGCAAACCATTTTCGCGGTTCAGGCTTTGTGT	0.442857	0.557143	0.590873	0.661014	0.0701408	-10.4	0.461552
main_Ube2m_chr7:13035241-13035311_22229	Mouse 3' UTR GCLiPP Peak	No	chr7:13035241-13035311	Ube2m	27	785	0.475518	381.263	GTCGCTAGGCCCAAGCAACCCACCCCACCACCACTGGAGGTCCCACCAGGCTATTAAAGGGGAATGTTAC	0.585714	0.414286	1.16769	1.22831	0.0606197	-12.7	0.686278
main_Snrpb_chr2:130171643-130171713_15002	Mouse 3' UTR GCLiPP Peak	No	chr2:130171643-130171713	Snrpb	5	204	2.56837	535.152	GTATGTACATAGTCCTTTTTCTCTGTGGCCTATGAAGCTGGTTTATAATAAACTAAGAGACTGTTATACA	0.342857	0.657143	1.18582	1.24632	0.060507	-12.1	0.650644
main_Nutf2_chr8:105879268-105879338_24739	Mouse 3' UTR GCLiPP Peak	No	chr8:105879268-105879338	Nutf2	3	121	1.08429	134.004	CCAGATATTGATTTGTTCAGATGTTTCAATGCCTCATGATACAATAAAACCACAAAAATTTTCTTAACAG	0.3	0.7	2.07908	2.11844	0.0393521	-4.6	0.601589
main_Ube2z_chr11:96049824-96049894_4908	Mouse 3' UTR GCLiPP Peak	No	chr11:96049824-96049894	Ube2z	19	984	1.14063	1146.38	AAGTGGTTTATAGGGATATCTGGGAGTTTGGGTGGGGGTGCTGTCCATGACACTTAAGCAGTCTGGTTGG	0.5	0.5	0.950465	1.1239	0.173437	-14	0.526873
main_Leng8_chr7:4147879-4147949_22147	Mouse 3' UTR GCLiPP Peak	No	chr7:4147879-4147949	Leng8	164	6115	1.58561	9903.33	TCTGCCTTCATGGATCACCAACTCACGTCATGTTTCCTTCTCTTTTCTCTGTGTGTGTGTTTATTTAAGT	0.4	0.6	1.36617	1.45842	0.0922535	-5.3	0.45104
main_Spint2_chr7:29256390-29256460_22583	Mouse 3' UTR GCLiPP Peak	No	chr7:29256390-29256460	Spint2	1	32	2.14256	70.0279	TAGCGGTCACTGTTTGTTTGATTTATGTGGGTTTTTTTTTTTTTTAAGTAGATAAAGGTTTTTTAAAAAA	0.242857	0.757143	0.357887	0.786197	0.42831	-4.5	0.476288
main_Dcaf12_chr4:41292726-41292796_17273	Mouse 3' UTR GCLiPP Peak	No	chr4:41292726-41292796	Dcaf12	30	1068	1.8506	2018.71	TTTAAAGCAAACACTGTTACAATCCCTTTTTATTTTTTCCTCTCCTTCCTCTGGCTTCTTTACACTGAAA	0.342857	0.657143	0.791028	1.00114	0.210113	-0.9	0.503496
main_Mybbp1a_chr11:72451488-72451558_4346	Mouse 3' UTR GCLiPP Peak	No	chr11:72451488-72451558	Mybbp1a	3	121	0.678554	83.8606	TTTCCCTGCCCTAGAGACTCCTATTTTTTCACCAATATTTTAATAAACAATCCATGATGCTATATGACGC	0.357143	0.642857	-0.0517746	0.719803	0.771577	-0.1	0.555876
main_Rbpj_chr5:53653605-53653675_19213	Mouse 3' UTR GCLiPP Peak	No	chr5:53653605-53653675	Rbpj	20	605	1.80062	1112.67	ACCGTGGTGTCCTAACTACCGTCTTTTTGCTGGGACTGAAACTGACTTGAATGCAGCAAAAAGTTGACAG	0.457143	0.542857	1.348	1.45854	0.110535	-16.4	0.498506
main_Arih1_chr9:59392508-59392578_25922	Mouse 3' UTR GCLiPP Peak	No	chr9:59392508-59392578	Arih1	23	796	2.14695	1745.51	GTGCATTTTCTTTCAGTTGGCTTTATCTTTCTAGGGTTGGGTTGGGATAAAGGTGTTTGTTAAGCCCCTC	0.428571	0.571429	1.6298	1.64124	0.0114366	-11.6	0.528024
th2_Glipr2_chr4:43978405-43978475_9074	Mouse 3' UTR GCLiPP Peak	No	chr4:43978405-43978475	Glipr2	29	1170	1.57569	1882.97	CAACCTTTAAAGAGCAAATACCACAGCCACTAGCACCTCTCACACCTCATATGTGGGTTGTTTGTTTGTT	0.428571	0.571429	NA	NA	NA	-11.7	0.588734
main_Arf3_chr15:98739936-98740006_9602	Mouse 3' UTR GCLiPP Peak	No	chr15:98739936-98740006	Arf3	84	3335	0.514465	1752.43	TGTTTGGCACTGGTTGCTGTGCTCTTGGCATCTGAGTCCCTTCCCTGTGTCCCTGGCCACTCTCCTCCCT	0.585714	0.414286	1.1691	1.21682	0.0477183	-11.3	0.665618
main_Rbx1_chr15:81475168-81475238_9250	Mouse 3' UTR GCLiPP Peak	No	chr15:81475168-81475238	Rbx1	36	1986	1.24239	2520.14	AGAACCATGGTCCTTTTTCGTTCCTTTGTTTTTGGAGTTTGGTGTTCCCGCAGCCATATTGTATTTTGTG	0.414286	0.585714	0.810535	0.933211	0.122676	-9.2	0.433122
main_Ppp2ca_chr11:52122278-52122348_3793	Mouse 3' UTR GCLiPP Peak	No	chr11:52122278-52122348	Ppp2ca	29	1843	1.29148	2431.09	TAACACCCGTGAGTCCAGTTGACTTCACTTAGCTGTAGCTTACTCAGCATGACTGTAGATGAGGATAGCA	0.457143	0.542857	2.1949	2.1949	0	-16.7	0.456158
main_Ppp1cb_chr5:32492532-32492602_19079	Mouse 3' UTR GCLiPP Peak	No	chr5:32492532-32492602	Ppp1cb	8	233	3.09152	735.725	CATAGATGTGTGAAACCTTATAGCGTCCTTGAAAGTGTTAAATTGAGAACTCTGTTAACATTTTATGGAT	0.328571	0.671429	1.33551	1.33658	0.00107042	-11.7	0.348903
main_Rbm8a_chr3:96631802-96631872_16628	Mouse 3' UTR GCLiPP Peak	No	chr3:96631802-96631872	Rbm8a	9	353	1.14378	412.387	CTAGGGCGGACCTTGTGTTTATATTTAATTTCTTACCCTATCTACTTGGCATTGCTTTTGAGTTTTAGAA	0.357143	0.642857	0.280211	0.737535	0.457324	-8.5	0.458763
main_Rtn3_chr19:7427599-7427669_12942	Mouse 3' UTR GCLiPP Peak	No	chr19:7427599-7427669	Rtn3	8	431	3.06369	1348.69	CTCAGTACCAAGCACAAGATGTGTTAGACTGAAAAAAGAACTGATCTCTTAGAACCGTAAAGAATAAAGA	0.357143	0.642857	0.956775	1.01382	0.0570423	-9.5	0.440734
rapidmain_Sdf4_chr4:156010139-156010209_18869	Mouse 3' UTR GCLiPP Peak	Yes	chr4:156010139-156010209	Sdf4	62	2213	1.32149	2986.99	TGTCCATATGCTCTGGCTTAGCTCCTGCCATGGCATGGCCCAGGTTTATTAAAGATATGCTTAATAGGCT	0.457143	0.542857	-0.324183	0.68793	1.01211	-18.4	0.630307
main_Caprin1_chr2:103766525-103766595_14731	Mouse 3' UTR GCLiPP Peak	No	chr2:103766525-103766595	Caprin1	29	1936	1.12888	2232.25	TCTGTCCTAAGCGTCATCTTGAGCCTTGCACACAATACAATACTCAGATTCCTCACCCTTGCTTAGGAGT	0.457143	0.542857	2.08296	2.08296	0	-15.1	0.464431
main_Gja1_chr10:56388859-56388929_1948	Mouse 3' UTR GCLiPP Peak	No	chr10:56388859-56388929	Gja1	19	883	1.10335	995.088	GGGGTGTTTTGGGATAGCTAGGCGGCAAAAGTAGGGAAAGGGGAGGTATGTAACGGTATTTAATGTAGAA	0.457143	0.542857	0.858648	1.10428	0.245634	-5.1	0.544094
main_Scd2_chr19:44303823-44303893_13353	Mouse 3' UTR GCLiPP Peak	No	chr19:44303823-44303893	Scd2	7	360	1.57768	580.108	CTCCTAATTCTTAGTAGGTGGCAACTGAGGAACTTCGTGACACTAAAATACAGTAACACATCAGTATCTC	0.4	0.6	0.170042	0.559845	0.389803	-9.5	0.533968
main_Ago2_chr15:73105931-73106001_8833	Mouse 3' UTR GCLiPP Peak	No	chr15:73105931-73106001	Ago2	96	4686	0.87679	4196.49	TCTTGTGACCTGCTTCACATATCAGGAGCTGTGTGGAGCCTGGAGACAGTCCACCTCTTGTGGCTTTTAG	0.514286	0.485714	0.493634	0.851775	0.358141	-21.5	0.712561
main_Aph1a_chr3:95896441-95896511_16574	Mouse 3' UTR GCLiPP Peak	No	chr3:95896441-95896511	Aph1a	86	2442	0.192373	479.821	CGGGTCCATTGCCCTCATCCTCCGTCTCCTCGCTGATGTGCCCCGCTTCCTTCCGGGTTTGGCGTTGTCC	0.642857	0.357143	0.972282	1.15459	0.18231	-13.8	0.592527
main_Pak2_chr16:32019208-32019278_10226	Mouse 3' UTR GCLiPP Peak	No	chr16:32019208-32019278	Pak2	12	325	1.2892	427.948	TTAGGTGTCCGTTTTGAATCAACCCTTATTTCACATACACCCCCTCCACCCTCTAGGGCAAGTAATAACC	0.457143	0.542857	0.394282	0.828169	0.433887	-8.3	0.576196
main_Pitpna_chr11:75626188-75626258_4438	Mouse 3' UTR GCLiPP Peak	No	chr11:75626188-75626258	Pitpna	27	935	2.99831	2863.36	AGCCTTTCTGTGCTCATTCTTCAGGCAACTTTCAATCCCTTACTATAGCTATTTCTAGATGCCCTTTAAC	0.4	0.6	1.52039	1.57913	0.0587324	-6.9	0.535974
main_Hmgn2_chr4:133964771-133964841_18218	Mouse 3' UTR GCLiPP Peak	No	chr4:133964771-133964841	Hmgn2	10	446	2.91511	1327.94	AAGTTCTTGTATATTGTTGATTGTCTGCCCATGTCCTGCCTGAAATACCATGATTGTTTATGAAAAGAAT	0.342857	0.657143	2.25672	2.25672	0	-4.2	0.416969
main_Oxct1_chr15:4154124-4154194_8441	Mouse 3' UTR GCLiPP Peak	No	chr15:4154124-4154194	Oxct1	6	320	1.49186	487.602	TGTGATTTGGTAGAATACTTTTTTGATGACTATGTATCTTTTACCTTCCTCTGTTTTGAGAGATGCCAGT	0.342857	0.657143	0.18262	0.605465	0.422845	-10.1	0.510164
main_Usf2_chr7:30945998-30946068_22639	Mouse 3' UTR GCLiPP Peak	No	chr7:30945998-30946068	Usf2	4	53	4.04057	218.729	CTTTATGGAAAATGGACAAAAAATAGAGAGAGAGGTATTTAACTGCAATAAACTGGCCAGTGTGGCCCCG	0.414286	0.585714	1.78456	1.82977	0.0452113	-9	0.542076
main_Pde12_chr14:26665046-26665116_7781	Mouse 3' UTR GCLiPP Peak	No	chr14:26665046-26665116	Pde12	3	169	0.866478	149.566	AGACACATGGAATACATTAGTCTGTCACTACCTCAATTTGGTTAGAATTTATTATAATTTTGGAGCTTTA	0.3	0.7	0.934451	0.982479	0.0480282	-8.3	0.50604
main_Hmgb2_chr8:57514103-57514173_24149	Mouse 3' UTR GCLiPP Peak	No	chr8:57514103-57514173	Hmgb2	15	580	1.96871	1166.27	GAAGAAGAGGAGGATGAAGAATAAGTGGCTGTCCTAAAGTGTGGAGTATATTTGCTCAGGCAATTATTTT	0.385714	0.614286	1.51993	1.61331	0.0933803	-10.4	0.341263
main_1810037I17Rik_chr3:122925549-122925619_16861	Mouse 3' UTR GCLiPP Peak	No	chr3:122925549-122925619	1810037I17Rik	46	1951	0.923669	1840.61	AGGACTCCAGCAGCTGACTTCGGCACCTCTATCTAACCTTTTCTTCAGCCCTTGACCTCACTAAAGTACT	0.485714	0.514286	-0.0175493	0.766394	0.783944	-5.9	0.576309
main_Tubb5_chr17:35834886-35834956_11319	Mouse 3' UTR GCLiPP Peak	No	chr17:35834886-35834956	Tubb5	143	7542	1.07169	8255.51	GCTGCTTAGATCCCTCAGCTTTCTCCAACTGCCCTTTGTCCTCCAGTTTCTTTCTGCTGCCTCTGTCTTG	0.514286	0.485714	0.550859	0.946859	0.396	-8.1	0.515558
main_Azin1_chr15:38489871-38489941_8628	Mouse 3' UTR GCLiPP Peak	No	chr15:38489871-38489941	Azin1	2	115	0.0956849	11.239	TTCATTAGATACGTTTAGTGTATTTAGGATGTGTAAATTTGTGCTTTTGAACTGTAGTTTAATAAATGTA	0.257143	0.742857	2.47923	2.47923	0	-8.4	0.449821
main_Ss18_chr18:14626866-14626936_11968	Mouse 3' UTR GCLiPP Peak	No	chr18:14626866-14626936	Ss18	4	88	3.13569	281.841	CATACTTTTCCACCGATTATTTTGTAAGGGGAAGGGGGAAATGTACACTTTTTACAGCAGCAATATTTTG	0.371429	0.628571	2.10862	2.10862	0	-10	0.567506
rapidmain_Slc7a1_chr5:148331338-148331408_20522	Mouse 3' UTR GCLiPP Peak	Yes	chr5:148331338-148331408	Slc7a1	117	4707	0.681542	3276.61	GCAGGAGATGGCTTGGGGTCCTATTGCTATTCCTCTTGTAGCTGTGGTGCCTTTGCCTGCTGCTGGTGAG	0.557143	0.442857	-0.680606	0.946352	1.62696	-25.9	0.599407
main_Slc7a5_chr8:121882735-121882805_25118	Mouse 3' UTR GCLiPP Peak	No	chr8:121882735-121882805	Slc7a5	60	2064	0.594233	1252.72	TGCTGGGACCTGAGGCCTGGACTTTCTGACTTTCTGGGGACTGCCACATCCAGGCTTTCTCCCCTGTGAT	0.571429	0.428571	-0.288662	0.662239	0.950901	-22.4	0.731697
main_Tmem65_chr15:58784783-58784853_8674	Mouse 3' UTR GCLiPP Peak	No	chr15:58784783-58784853	Tmem65	19	719	1.34089	984.713	ACTGTCCCCACAGTTAGCAGTGAAGACAGTAGCAGTGTATAGATACGGGATCAAATAACTCAGCATGTAC	0.442857	0.557143	1.81113	1.82152	0.0103944	-12.4	0.620771
main_Phlda1_chr10:111508235-111508305_2836	Mouse 3' UTR GCLiPP Peak	No	chr10:111508235-111508305	Phlda1	37	2153	1.96573	4322.71	AGCAGATTTTGCGTCGAGATGACTTTATTTATGGACCTTTGGAAGGATCACCTAACGTAATGGACCTTTG	0.414286	0.585714	0.990239	1.18142	0.191183	-10	0.626895
main_Pfn1_chr11:70652083-70652153_4321	Mouse 3' UTR GCLiPP Peak	No	chr11:70652083-70652153	Pfn1	69	2110	0.740939	1596.81	GCCTCTCACCTGCGGCGTTCCCAGTACTGACCTCATCTGTCCCTTCCCCCCACCGTTCCCTTTGGCTTTT	0.6	0.4	1.30523	1.38308	0.0778592	-8.4	0.409766
main_Irf2bp2_chr8:126590874-126590944_25208	Mouse 3' UTR GCLiPP Peak	No	chr8:126590874-126590944	Irf2bp2	2	52	0.683666	36.3108	TTGTGTTTCTATATTTTTTTTGACGACAAAAGGTATGTACTTTAAGGCATTTTCTTCTTTTGTTAACGTT	0.271429	0.728571	2.32335	2.33572	0.0123662	-7.5	0.458676
main_Mlec_chr5:115145361-115145431_19669	Mouse 3' UTR GCLiPP Peak	No	chr5:115145361-115145431	Mlec	20	1297	0.557987	739.183	GTTTTGAGCTAGAACAAGGAGTTGCCTGGGATTGGGAGCTGTGGGTGGTGCAAGTCAGGGAGTGGGCCAG	0.571429	0.428571	0.121352	0.542338	0.420986	-15	0.584405
main_Arcn1_chr9:44743601-44743671_25641	Mouse 3' UTR GCLiPP Peak	No	chr9:44743601-44743671	Arcn1	43	1694	1.95222	3377.77	CAGGGAATGGAATGCCCCAGTAAATAGCTCTTCTGCCTTCACCTAAGTCTTCCTTTATTTTAAGCCCTAA	0.428571	0.571429	0.743408	0.950563	0.207155	-8	0.615206
main_Tagap_chr17:7934246-7934316_10630	Mouse 3' UTR GCLiPP Peak	No	chr17:7934246-7934316	Tagap	7	158	1.48931	240.343	TCACACGGTGACACCAAATTTTGCCTGTGTGTAACCGGGTTTGTGCAATATGTAGTAAATGTATAAAATG	0.385714	0.614286	-0.0441268	0.785958	0.830085	-13.5	0.573395
main_Ube2k_chr5:65595067-65595137_19286	Mouse 3' UTR GCLiPP Peak	No	chr5:65595067-65595137	Ube2k	1	29	2.04314	60.5179	GCACCATTGGAGACTGCAAAAAAAAAAATTCCCTGCTCTGTAAATAAAGCTAATTAAACGTCTGTGTAAA	0.342857	0.657143	1.99039	2.00408	0.0136901	-3.8	0.451185
main_Sept11_chr5:93173137-93173207_19431	Mouse 3' UTR GCLiPP Peak	No	chr5:93173137-93173207	2019-09-11	14	596	1.44293	878.375	GCCTTGGAATAGAAAACACCCCTTTGCATTCAATTTCTCTCATCCCTAAAAGCTTTTAAAGACATGCTCA	0.385714	0.614286	0.447465	0.660873	0.213408	-4.2	0.479503
main_Naa50_chr16:44159685-44159755_10362	Mouse 3' UTR GCLiPP Peak	No	chr16:44159685-44159755	Naa50	1	12	1.9045	23.3426	AAGAAAGACCCATTGGTTCCCTTCCCCCCTTTCTTCCACTTTCCTCCTTTGTTATTCCTTTTTTTTTTTC	0.4	0.6	0.461549	0.891775	0.430225	-4.5	0.489396
main_Arpc4_chr6:113389572-113389642_21540	Mouse 3' UTR GCLiPP Peak	No	chr6:113389572-113389642	Arpc4	83	2411	0.585594	1442.06	CCCATGCTCGCTGTCTCGGATTCTGATGAACTCCCCTCCCCCCTAATTAAAGTCTCTTCCTGCCCCTTCG	0.557143	0.442857	0.960141	1.12192	0.161775	-4.1	0.626389
main_Tmed7_chr18:46587620-46587690_12279	Mouse 3' UTR GCLiPP Peak	No	chr18:46587620-46587690	Tmed7	85	4890	0.635611	3174.6	TGAGTCCTGTGAGCATTCTGGTGAACTAGTTCTTGGTTGAGCCATTGCCAGCGTAGGTCAGCAGTTGTGA	0.5	0.5	0.206662	0.682324	0.475662	-17.3	0.445384
main_Ctsb_chr14:63142880-63142950_8147	Mouse 3' UTR GCLiPP Peak	No	chr14:63142880-63142950	Ctsb	29	1116	1.78618	2036	GCCGATGCTTTTTCAATAGGATTTTTATGCTTTGTGTACCTCAACCAAGTATGAAGAGCTGTACTGGTTT	0.385714	0.614286	0.143296	0.710282	0.566986	-13.6	0.446014
main_Mllt10_chr2:18212011-18212081_13720	Mouse 3' UTR GCLiPP Peak	No	chr2:18212011-18212081	Mllt10	37	1865	2.52435	4808.58	AGTCTGTCTTCTGTGACACTGCACACCTCTTACCTCACTTCTGTAAATAAGGTTGTGAATCTGTTTTGTA	0.4	0.6	2.15624	2.15624	0	-10.2	0.449096
main_4833439L19Rik_chr13:54551249-54551319_7228	Mouse 3' UTR GCLiPP Peak	No	chr13:54551249-54551319	4833439L19Rik	3	66	1.48769	100.287	ACCTCAGAGAGAAGCCCTGGAGTCTAAGATTGTTGTAAAAATTAATTTATTTGTGTTATCTTGTATTGAC	0.328571	0.671429	0.767296	1.0527	0.285408	-4.9	0.372681
main_Nras_chr3:103064738-103064808_16668	Mouse 3' UTR GCLiPP Peak	No	chr3:103064738-103064808	Nras	38	1377	2.42254	3407.16	CACGAATACTCTCAACTGCATGCAATTAAATCCAACATTCACAACAAAGTGCCTTTTTCCTAAAAGTGCT	0.371429	0.628571	0.952352	1.08286	0.130507	-4.2	0.562096
main_Fbxw11_chr11:32745347-32745417_3563	Mouse 3' UTR GCLiPP Peak	No	chr11:32745347-32745417	Fbxw11	7	268	0.808543	221.323	AGTATTCACTTGGGTTTTAGTTGTCACTGTCTTTGTGTGTGCTGTGTGTTTTCAGACAGAACTTGAGAAG	0.4	0.6	1.00089	1.1023	0.101408	-11.8	0.507825
rapidmain_Ago2_chr15:73101983-73102053_8813	Mouse 3' UTR GCLiPP Peak	Yes	chr15:73101983-73102053	Ago2	109	4926	0.707603	3560.18	CCATGTGACCTTGCTGGGACCTAAGTACATGGTCTGTTTAGCCCCACGTGGACTGTCTGTAGTCAGGGTG	0.542857	0.457143	-0.430817	0.792423	1.22324	-19.7	0.621873
main_Amd1_chr10:40289058-40289128_1880	Mouse 3' UTR GCLiPP Peak	No	chr10:40289058-40289128	Amd1	39	2246	1.87152	4293.32	CTCTCTTCTGTGTTTAGGTGTTCTATGCCACTCTTGCTGTGGAACTGAAGTGCATGTAGAAAAGACCTTT	0.428571	0.571429	2.08789	2.1129	0.0250141	-14	0.494717
main_E2f1_chr2:154560445-154560515_15295	Mouse 3' UTR GCLiPP Peak	No	chr2:154560445-154560515	E2f1	95	3536	0.503653	1819	GAAGGATGTTGTACAGTGTGTGTGCATGCACCCCACACTGCGCACTGTGTGCCTGGGGTGTGTGTCTGAG	0.571429	0.428571	0.622718	0.926014	0.303296	-23.9	0.39645
main_Msi2_chr11:88342665-88342735_4801	Mouse 3' UTR GCLiPP Peak	No	chr11:88342665-88342735	Msi2	10	353	1.62095	584.43	GTGTGAGGCACTGAACGCGACATTTATTACAATGAGCTGCTGCACTCCTACTTTTATAAATTTTACTAAC	0.385714	0.614286	2.02649	2.02714	0.000647887	-8.8	0.639187
main_Kif5b_chr18:6203314-6203384_11911	Mouse 3' UTR GCLiPP Peak	No	chr18:6203314-6203384	Kif5b	2	75	0.74487	57.0598	ACATTACATAGCTGCTATTGCTTTTCATTTTCCCTTTTCTACTAAAATGTCTTTTTTTTTTAAAGGAAAT	0.257143	0.742857	0.857887	0.977521	0.119634	-5.1	0.398333
main_Mapk1ip1l_chr14:47319478-47319548_7948	Mouse 3' UTR GCLiPP Peak	No	chr14:47319478-47319548	Mapk1ip1l	24	898	1.57224	1442.06	GAGAAAGCATATATAATGGCTGGTTTCGCTGTTGGTTGAGGGCATTTGTGAAAGAACTTTGCACCTCAGT	0.428571	0.571429	1.34072	1.39556	0.0548451	-15.2	0.541851
main_Ptms_chr6:124913940-124914010_21755	Mouse 3' UTR GCLiPP Peak	No	chr6:124913940-124914010	Ptms	35	1419	0.084704	122.765	TCACCCTCACTGCCACCGGTCCAGCTCCTGACCCGCCTCATCTGAGCTCCCCAGCCAGCCCTCACTTGCC	0.671429	0.328571	0.690507	0.950958	0.260451	-8.9	0.50549
main_Rab14_chr2:35181787-35181857_14216	Mouse 3' UTR GCLiPP Peak	No	chr2:35181787-35181857	Rab14	27	1687	1.68837	2909.18	AGCCAGTAAGTTCATTGCTGTGAAATGACTTTGGATGGTAGAGAAAAGGGGTCTGCAACTGCTTTTGTTT	0.414286	0.585714	1.2351	1.35144	0.116338	-16.1	0.46684
main_Cebpg_chr7:35048126-35048196_22675	Mouse 3' UTR GCLiPP Peak	No	chr7:35048126-35048196	Cebpg	17	687	2.09208	1467.99	CTGAACACAAATGTTTGGACTCAAATGTTCTTACTCAAGTGGGAATGATGTTTAATTTGATAGATTTCTC	0.328571	0.671429	0.11269	0.580577	0.467887	-11.8	0.60969
main_Srsf1_chr11:88049982-88050052_4782	Mouse 3' UTR GCLiPP Peak	No	chr11:88049982-88050052	Srsf1	6	176	2.46238	442.646	CTGAAGAGATGGATTAAGAATGCTTTGGATTAAGGATTGTGGAGCACATTTCAATCATTTTAGGATTGTC	0.357143	0.642857	2.28537	2.28537	0	-11.6	0.412562
main_Lamtor3_chr3:137928589-137928659_16958	Mouse 3' UTR GCLiPP Peak	No	chr3:137928589-137928659	Lamtor3	46	2521	1.99305	5131.92	ATCACTGCTTATGATGTCTCTCCGCTTTGCTGTAACCGTGCTTCCACCATTGTGTTCTTTGTACAATTGA	0.428571	0.571429	0.579085	0.802437	0.223352	-3.5	0.57736
main_Dazap2_chr15:100619911-100619981_9694	Mouse 3' UTR GCLiPP Peak	No	chr15:100619911-100619981	Dazap2	38	1470	1.85699	2788.15	TTACTTGGTAAATGAAATGCATTAGCTGTCTGCCTTTTCCTTCCCATCCTCTGCCCAGCCTGTCCACTGT	0.471429	0.528571	0.866338	1.11952	0.253183	-4.9	0.439114
main_Ube2g1_chr11:72684191-72684261_4349	Mouse 3' UTR GCLiPP Peak	No	chr11:72684191-72684261	Ube2g1	29	1233	2.50844	3159.04	CACCCATCTCTTGGATTGGATGTAGCAATAACATTTTCTGGCTGTTGAGAGCTCTTGATCCTAGTCATTA	0.414286	0.585714	1.36732	1.4053	0.0379718	-10.1	0.467039
main_Bcas2_chr3:103178561-103178631_16691	Mouse 3' UTR GCLiPP Peak	No	chr3:103178561-103178631	Bcas2	21	809	1.12057	925.925	GGACTATGTAAACTGTTGTATTGCTTCTGTGTGAGTGTCTTAGCAAAATAAAGTTGTCAACATGTTGCTG	0.371429	0.628571	0.332648	0.663296	0.330648	-9.3	0.372265
main_Nucks1_chr1:131933786-131933856_929	Mouse 3' UTR GCLiPP Peak	No	chr1:131933786-131933856	Nucks1	97	6927	1.33852	9470.19	TCAACTGTCTTACTTTGCAGTGCTCAGGAATGGGATGCTCATTTGAAGGTGCTTGTCTGTTACTGATGCT	0.442857	0.557143	0.845845	1.19661	0.350761	-14.9	0.403924
main_Mknk2_chr10:80666091-80666161_2440	Mouse 3' UTR GCLiPP Peak	No	chr10:80666091-80666161	Mknk2	31	1249	0.250748	319.881	GCTGGGAAGGGATGTGGTGGCCCTGCGGTGCCCAGACCTAACTGCCCGAGGCCTGTAGACTGTTCTAGCC	0.642857	0.357143	-0.181338	0.670577	0.851915	-22.4	0.545317
main_Pnrc1_chr4:33245849-33245919_17211	Mouse 3' UTR GCLiPP Peak	No	chr4:33245849-33245919	Pnrc1	1	20	4.35918	89.0478	TATTTTGTAAATACTGTATACCATGTATTATGTGTACATTGTTCATACTTGAGAGGACATTATAGTTTTG	0.271429	0.728571	1.57617	1.57617	0	-8.5	0.502295
main_Polr1d_chr5:147078983-147079053_20486	Mouse 3' UTR GCLiPP Peak	No	chr5:147078983-147079053	Polr1d	12	468	1.53915	735.725	TGTCCTGTAGGAAAGAAAATGTGGCTCTAGCTATTGACCCATACAGCTGTTGGAATCTCTGCAAGTATAT	0.414286	0.585714	0.380915	0.666268	0.285352	-9.2	0.598978
main_Swi5_chr2:32278983-32279053_14118	Mouse 3' UTR GCLiPP Peak	No	chr2:32278983-32279053	Swi5	13	363	0.902407	334.578	GATTTTCATCTACAGCCCACAGGGACAGGAGGATGGGGGCATAAAAGGCAGAGTCTAGACAGTATGTTCA	0.485714	0.514286	-0.127239	0.702113	0.829352	-13.6	0.426738
main_Zfp36l2_chr17:84185250-84185320_11826	Mouse 3' UTR GCLiPP Peak	No	chr17:84185250-84185320	Zfp36l2	7	221	0.811973	183.283	TTGGAAGGGGTTCCAAGACCAGTGTGAGCCAGCCGGCTGCCACCTCCCTAAACTATAAGCTTCTAGAACT	0.528571	0.471429	1.04097	1.07128	0.0303099	-16.7	0.600311
main_Rnf149_chr1:39552334-39552404_176	Mouse 3' UTR GCLiPP Peak	No	chr1:39552334-39552404	Rnf149	10	518	1.53602	812.67	AGGGCAGAGTTTGTATACTTGAAAACAGTGGACTTTATTTTACTTTACCTTTCAGATTCAGGTTTGATAT	0.328571	0.671429	0.965789	1.04632	0.0805352	-8	0.587409
main_Junb_chr8:84976941-84977011_24548	Mouse 3' UTR GCLiPP Peak	No	chr8:84976941-84977011	Junb	28	1144	2.17752	2544.35	ACACGCACTTCGTGTCTAAAGTCTATTTTAAGATGTGTTTGTGTGTGTGTGTTTGACTTTTTATTGAATC	0.342857	0.657143	1.31386	1.35642	0.0425634	-13.5	0.531187
main_Nras_chr3:103065553-103065623_16674	Mouse 3' UTR GCLiPP Peak	No	chr3:103065553-103065623	Nras	11	320	0.857024	280.112	ATAAAGCTTGTGTGGTTCTCACCAGGACTGGAAGTACCTGGTGAGCTCTGGGGTAAGCCTAGATATCTTT	0.471429	0.528571	0.131521	0.564366	0.432845	-25.4	0.561227
th2_Tmem167_chr13:90105207-90105277_3901	Mouse 3' UTR GCLiPP Peak	No	chr13:90105207-90105277	Tmem167	7	431	1.69289	745.235	TTTAAGTCTAGTGTATGTTCTGTCAGCTTGAACTGGAATCTCTCTTGTAACTTTGTAGGTTATAAACATA	0.328571	0.671429	NA	NA	NA	-11.2	0.53784
main_Lrp10_chr14:54470188-54470258_8019	Mouse 3' UTR GCLiPP Peak	No	chr14:54470188-54470258	Lrp10	32	1994	0.827341	1684.99	GGCCCACTTAGAGGACACAAGTGCTTTTGCCCTGTAGCTGCATCATTGTCCAGGAAATCAAGATGACAAA	0.471429	0.528571	0.556479	0.763437	0.206958	-12.2	0.55675
main_Eif4e2_chr1:87227994-87228064_602	Mouse 3' UTR GCLiPP Peak	No	chr1:87227994-87228064	Eif4e2	19	848	1.64997	1429.09	CCTTTGAGAACAGGCTGACAGCAGCAACTACTACAACAGCTGAGATCACAAATAAATGGTGCTAAACCAG	0.442857	0.557143	1.84677	1.88435	0.0375775	-10.1	0.637909
main_Ndufa10_chr1:92439500-92439570_682	Mouse 3' UTR GCLiPP Peak	No	chr1:92439500-92439570	Ndufa10	10	255	0.37841	98.5578	AGCTCCCACTGGAAGCCCCGTGCCCCAGTGCTGTTCCCTTGAACCCTTCCAACTTGAAGAAATAAAGCCG	0.557143	0.442857	-0.149958	0.695394	0.845352	-13.5	0.568878
cd8_Wdr26_chr1:181175137-181175207_755	Mouse 3' UTR GCLiPP Peak	No	chr1:181175137-181175207	Wdr26	2	47	2.34123	112.39	AATAGTGGAGAATTTTGGCTCCAAAAATCAGGTTAGTAGGCTCAATTCCATGTGCTTAAAATGTTTCTGT	0.357143	0.642857	1.87255	1.90734	0.0347887	-12.5	0.512429
rapidmain_Ccnl2_chr4:155823713-155823783_18847	Mouse 3' UTR GCLiPP Peak	Yes	chr4:155823713-155823783	Ccnl2	53	2016	0.45933	945.809	GCTGCCCTTGGTCCCTCCCTGTTGGGCACACCTTGGCGTCAGTGGCCTTGTAGCATGATGTTTTTCGAAA	0.557143	0.442857	-0.324958	0.705352	1.03031	-15.6	0.5507
main_Rap1b_chr10:117815404-117815474_2916	Mouse 3' UTR GCLiPP Peak	No	chr10:117815404-117815474	Rap1b	6	101	2.26277	233.426	TATTGGAGAGTACAATAATGTAAATCCTAAAAGCACCACTATTTTAGCATAATAAAAGAAAGTCCAAAGA	0.285714	0.714286	2.53417	2.53417	0	-5.4	0.477006
main_Cyb5b_chr8:107184433-107184503_24792	Mouse 3' UTR GCLiPP Peak	No	chr8:107184433-107184503	Cyb5b	66	2815	1.18773	3414.94	CAGTGTAGCTGATGGCTCCTCCTGTCTCTAAGTCCCGCCTCTTTTCCCAAAATACTTCACAAAGTGTGCA	0.485714	0.514286	-0.0416761	0.554887	0.596563	-8.7	0.622137
main_Dhfr_chr13:92384805-92384875_7474	Mouse 3' UTR GCLiPP Peak	No	chr13:92384805-92384875	Dhfr	30	1196	2.09558	2559.91	GGAAGATGCTTTCAAGTTCTCTGCTCCCCTCCTAAAGCTATGCATTTTTATAAGACCATGGGACTTTTGC	0.428571	0.571429	0.0581972	0.627099	0.568901	-8.4	0.52077
main_Agps_chr2:75926691-75926761_14440	Mouse 3' UTR GCLiPP Peak	No	chr2:75926691-75926761	Agps	36	1647	1.8594	3127.91	CTGTATTTGTATCACTGAGGTGTCAACTATAGCTGTGTCCTGGATCGTTCATAGCGTGCTTTGTAAGAAC	0.428571	0.571429	0.786521	0.939704	0.153183	-10.9	0.52713
main_Ctsb_chr14:63143080-63143150_8149	Mouse 3' UTR GCLiPP Peak	No	chr14:63143080-63143150	Ctsb	26	1248	1.59522	2033.4	CCTGTAGTTTAACAAGGAATGTCTGTGCCAATAAACCAATTCTCCCTCTGCTTGACATTGGCAGGGTGCA	0.457143	0.542857	0.478901	0.895521	0.41662	-12.8	0.556611
main_Mrpl11_chr19:4964883-4964953_12698	Mouse 3' UTR GCLiPP Peak	No	chr19:4964883-4964953	Mrpl11	43	1759	2.48255	4460.17	TGACATGTTTCTGTACATTTGCTGTGCCAGGGGATCAAGCCTGAATAAATATCCTTTGTCATCAACTCTC	0.414286	0.585714	0.193915	0.782282	0.588366	-11.5	0.668473
main_Pafah1b1_chr11:74674681-74674751_4391	Mouse 3' UTR GCLiPP Peak	No	chr11:74674681-74674751	Pafah1b1	31	1499	0.634127	970.881	TTGGAAGCTTTGGCTTTAGGCTCACCAAGCCCAGTCTCCTGTTTGCCTCTTTCTGTTCTTTGTGAACTTC	0.471429	0.528571	1.36415	1.45714	0.0929859	-15.1	0.476908
main_Larp1_chr11:58061075-58061145_3989	Mouse 3' UTR GCLiPP Peak	No	chr11:58061075-58061145	Larp1	69	2340	1.40857	3366.53	TGTGTGTGTGTGTGTGTGTGTGTGTGTGTGTATTTTTTGTGACATGTTAAGAGTTGATGTTGCGGAGTAG	0.414286	0.585714	0.75638	1.13906	0.382676	-7.7	0.504109
main_Nusap1_chr2:119649010-119649080_14841	Mouse 3' UTR GCLiPP Peak	No	chr2:119649010-119649080	Nusap1	32	1045	2.44132	2605.73	AACTTGTTTTCCTTTTGTATGTTTTTTACTCTTTCTCTACTTCAGTCAAAAGCTCTTTTCTATCATAACT	0.285714	0.714286	0.0747042	0.744225	0.669521	-4.1	0.434101
main_Rhoa_chr9:108336861-108336931_26414	Mouse 3' UTR GCLiPP Peak	No	chr9:108336861-108336931	Rhoa	1	16	0.317416	5.18725	TGTTTATTAATCTTAGTGTATGATTACTGGCCTTTTCATTTATCTATAATTTACCTAAGATTACAAATCA	0.242857	0.757143	2.44462	2.44462	0	-10.8	0.44177
main_Cdc42_chr4:137321033-137321103_18368	Mouse 3' UTR GCLiPP Peak	No	chr4:137321033-137321103	Cdc42	63	2248	1.42065	3261.92	AACGCATCTCCAGAGCCCTTTCTGCACAGCTGGTGTTGTCGTCATACTAAAAGCAATGTTTAAATCAAAC	0.428571	0.571429	1.97307	1.98231	0.00923944	-7.7	0.540342
main_Sumo3_chr10:77616599-77616669_2208	Mouse 3' UTR GCLiPP Peak	No	chr10:77616599-77616669	Sumo3	38	1390	0.677764	962.235	TGGTCATATTCCCCAATGGGCATGCCTGTGGGATGTGGGGAGGGGCAGAGAGGCAGAATTCCACCTGTTC	0.571429	0.428571	-0.0972817	0.505254	0.602535	-19.2	0.598909
main_Gadd45gip1_chr8:84834403-84834473_24528	Mouse 3' UTR GCLiPP Peak	No	chr8:84834403-84834473	Gadd45gip1	19	719	1.17961	866.271	TGTCTGGTGAACCCAGCTCCTGAAAGCTCCCTTCCCAATAAAGCCAGCTGCTGACAACCCATATTCTACA	0.5	0.5	0.231873	0.82962	0.597746	-10.5	0.569806
main_Gnai3_chr3:108108794-108108864_16816	Mouse 3' UTR GCLiPP Peak	No	chr3:108108794-108108864	Gnai3	1	19	1.06919	20.749	CTTAGTAGGAACTGTTTGTTTTTAACTCTTGGAATGGTCGGGAGTAATATTTCAATAATTAAAATTCTTC	0.3	0.7	1.22065	1.29992	0.0792676	-10.8	0.497866
main_Lamtor3_chr3:137928093-137928163_16957	Mouse 3' UTR GCLiPP Peak	No	chr3:137928093-137928163	Lamtor3	16	686	1.34493	942.351	CAATAGTACTTGTAGCTATGTATTCAGAAGGCCGCTTTTCCACATTACACTAAAGAAGAGCCTATTGCTA	0.385714	0.614286	0.387606	0.774817	0.387211	-9.1	0.518131
main_Pole4_chr6:82647621-82647691_21131	Mouse 3' UTR GCLiPP Peak	No	chr6:82647621-82647691	Pole4	39	2033	1.52551	3167.68	CTGGGAACCCATGTGATCAGGCACAGACTTTCCTCATCTTTCTACCAACCACTCCAAGTCAGTCTTTTTA	0.457143	0.542857	0.0852958	0.449268	0.363972	-8.3	0.604673
main_Dbnl_chr11:5800311-5800381_3304	Mouse 3' UTR GCLiPP Peak	No	chr11:5800311-5800381	Dbnl	19	794	0.957313	776.359	GACTCAGAGCAGGCATATCTGGGGCCACAGTGTACTCTTGCCTTTCTTTCTGGGTGGCTTCTAAGGGTGG	0.542857	0.457143	0.106465	0.519254	0.412789	-16.6	0.547923
main_Mtdh_chr15:34141185-34141255_8562	Mouse 3' UTR GCLiPP Peak	No	chr15:34141185-34141255	Mtdh	28	1024	2.15331	2252.13	TGCTTAAATCAAAGTGCTTTGATCAAATGTATAATCTGCCATATCTTTACATATTTGTTGTAGCAGTTTG	0.3	0.7	1.72132	1.7493	0.0279718	-12.3	0.378093
main_Bnip2_chr9:70007502-70007572_26074	Mouse 3' UTR GCLiPP Peak	No	chr9:70007502-70007572	Bnip2	5	208	1.1191	237.749	ATATATACACGTAAATAAGACCACGATTTTAAATGTAAAGTGCATGTAAGACTTTGTTTTTGTAAATGGT	0.271429	0.728571	1.05917	1.09692	0.0377465	-7.3	0.435979
main_Pafah1b2_chr9:45967879-45967949_25717	Mouse 3' UTR GCLiPP Peak	No	chr9:45967879-45967949	Pafah1b2	110	6631	1.1505	7792.12	TGTGTGGTGTTCTGTGATGTAGGGTCTGTGTAATGTTCATCATCCAGAGTTCTGCTTGTCATCCCCTCCC	0.485714	0.514286	0.833197	0.975	0.141803	-12.2	0.565296
main_Capza1_chr3:104823867-104823937_16725	Mouse 3' UTR GCLiPP Peak	No	chr3:104823867-104823937	Capza1	36	2025	1.42537	2948.09	GCTTTACTACCTTGCAAGGGACTTTAGATGTAGCCGGCCCTGAAGCTTTGTTATAAGAGTTGTCACACAG	0.457143	0.542857	0.125873	0.329648	0.203775	-10.1	0.398369
main_Adam19_chr11:46144723-46144793_3635	Mouse 3' UTR GCLiPP Peak	No	chr11:46144723-46144793	Adam19	25	477	0.814502	396.825	GGATCTCAAGAGCGTTGAGCCGAGTGGGCGTGTATGTGTGTGTGTGTGTGTGTGTGTGTGTGTGTGTGTG	0.542857	0.457143	0.0709014	0.320423	0.249521	-8.2	0.377717
main_Rap2b_chr3:61366288-61366358_16148	Mouse 3' UTR GCLiPP Peak	No	chr3:61366288-61366358	Rap2b	8	315	1.71976	553.307	TGCCAATACAGTGTGGGGTGCCAGGAAGTGTCTGCTGATATTTGTGGGGAAAAAAAATCTATTTTGATTA	0.4	0.6	1.92275	1.92877	0.00602817	-12	0.533428
main_Lrrc59_chr11:94643801-94643871_4851	Mouse 3' UTR GCLiPP Peak	No	chr11:94643801-94643871	Lrrc59	3	67	1.68025	114.984	CATAGGCTTTTCTAGTTATACAAAGCTGTGTAAGGCAAGGTTCCTTTCTACTAAATGGTCAGCTGTCACT	0.4	0.6	1.48551	1.61951	0.134	-8	0.591853
main_Cdca3_chr6:124833175-124833245_21729	Mouse 3' UTR GCLiPP Peak	No	chr6:124833175-124833245	Cdca3	31	1082	1.80788	1997.96	AAGCCCTGTTCTGATTCCTCTCAGGCACCAACTCTGGTACTTGGACATCGTTCTTTTAAAATGTTTTATG	0.414286	0.585714	0.0442254	0.494873	0.450648	-9.5	0.605661
main_Foxo1_chr3:52349375-52349445_16089	Mouse 3' UTR GCLiPP Peak	No	chr3:52349375-52349445	Foxo1	68	2237	1.64672	3762.49	AATGTTCGCTTTCTGGTCTATTATTGTACATGATTGCTCTGTGAAAAGACTTCATCTATGCAGCCTTGTT	0.371429	0.628571	1.81221	1.83235	0.0201408	-7.2	0.543666
main_Rnf126_chr10:79758804-79758874_2274	Mouse 3' UTR GCLiPP Peak	No	chr10:79758804-79758874	Rnf126	51	2011	0.957563	1966.83	GGCAGGCACCTTCAGTCCGTCTTAACCTCACCCTCCAAATGTTCAACGGCAGAAGGGTTTTTATGATTTT	0.471429	0.528571	0.610746	1.03244	0.42169	-11.5	0.564615
main_Etf1_chr18:34903878-34903948_12077	Mouse 3' UTR GCLiPP Peak	No	chr18:34903878-34903948	Etf1	8	396	1.53685	621.606	AACCCCTGGTGGGGCTGGAGCATCTATTTCAAAAAGTGGGATCTACAAGCACCTCTCAGATGAGAAAGTA	0.471429	0.528571	1.50982	1.5672	0.0573803	-14.9	0.615065
rapidmain_Man2b1_chr8:85097502-85097572_24584	Mouse 3' UTR GCLiPP Peak	Yes	chr8:85097502-85097572	Man2b1	6	299	0.8974	274.06	CACAGGCCTGCCTGAAGGAGGGGCAGGCCTCCCCTTCTCTTGCTGTAACCATTCACAAAAATCATTAAAA	0.5	0.5	-0.244521	0.801282	1.0458	-20.4	0.619462
main_Mettl16_chr11:74818084-74818154_4398	Mouse 3' UTR GCLiPP Peak	No	chr11:74818084-74818154	Mettl16	8	327	2.44614	816.992	CAGCCTGTGCTACAGAGACAGACACTCGTCTAAATAAAAAGAAGGAAAAAGGAAAGCAGCAGTGGATCCA	0.442857	0.557143	-0.135394	0.649085	0.784479	-8	0.51591
main_Fbxw8_chr5:118067492-118067562_19769	Mouse 3' UTR GCLiPP Peak	No	chr5:118067492-118067562	Fbxw8	59	2315	0.64827	1532.83	GACAGCCATCCTTCCTGCAGAGGGAAAGGGTCATTGCACAGGGATAGGGTCAGTCTCCAAGCCTAGCCGG	0.585714	0.414286	-0.0983521	0.469113	0.567465	-15.7	0.473388
main_Rpl39_chrX:37082655-37082725_26851	Mouse 3' UTR GCLiPP Peak	No	chrX:37082655-37082725	Rpl39	40	1774	1.78879	3241.17	GAGGAGAACGAAGCTGGGTCTGTAAGGATTCACACAATGGCAAGACTGAGGATTTATACTGAATTGTCAT	0.428571	0.571429	0.401099	0.918958	0.517859	-11.7	0.449126
main_Grb2_chr11:115645430-115645500_5619	Mouse 3' UTR GCLiPP Peak	No	chr11:115645430-115645500	Grb2	29	1238	1.87476	2370.57	TTCTTTCCTGTCCAGTGCATGATGTTTAAGGCCACATATAGTCCAGCTGATGCCAATAATAAAAGACAAG	0.4	0.6	1.48661	1.5952	0.108592	-7.1	0.531201
main_Ywhaz_chr15:36772619-36772689_8612	Mouse 3' UTR GCLiPP Peak	No	chr15:36772619-36772689	Ywhaz	14	467	1.56782	747.829	TCTAAAATTTACACAGTAGACCATTTGTCATCCATGCTGTCCCACAGATAGTTTTTTTGTTTACGATTTA	0.328571	0.671429	2.07441	2.07441	0	-7.3	0.449252
main_Rab7_chr6:87999904-87999974_21318	Mouse 3' UTR GCLiPP Peak	No	chr6:87999904-87999974	Rab7	77	2820	1.93962	5586.67	CCAGGCTCCGTTCTGAGCAGGCTGTTTTGTATGTATCTGTTAATGCTTGTTACTTTTAACTAATCAGATC	0.4	0.6	1.25686	1.26396	0.00709859	-8.7	0.575171
main_Stt3a_chr9:36732684-36732754_25498	Mouse 3' UTR GCLiPP Peak	No	chr9:36732684-36732754	Stt3a	1	12	3.59738	44.0916	TCTGAGCAGGTTACCAAATGAAATGTTATGGCTTTACTTTGGTCAATTAAAAGGGGGGGGGGATTTTTTT	0.385714	0.614286	1.63282	1.80549	0.172676	-5.9	0.434849
main_Rer1_chr4:155074841-155074911_18797	Mouse 3' UTR GCLiPP Peak	No	chr4:155074841-155074911	Rer1	9	345	2.36268	832.554	AAGAACGGTTTTGAGCCATTGTAACAATGCCTTTTTCTTCACATAAAGTAGTTGATTATGAGGAAGTTGA	0.342857	0.657143	1.09696	1.16763	0.0706761	-8.5	0.535508
main_Mlf2_chr6:124936032-124936102_21764	Mouse 3' UTR GCLiPP Peak	No	chr6:124936032-124936102	Mlf2	17	511	2.53602	1323.61	TCCCCCACCCATCACAGAAACACTTTCCTTTACCCTTCTCTGCCTTTATAAAAACTAATGATTTGTGCAA	0.4	0.6	0.740521	1.12215	0.381634	-2.5	0.491054
main_Vdac3_chr8:22577469-22577539_23926	Mouse 3' UTR GCLiPP Peak	No	chr8:22577469-22577539	Vdac3	11	784	1.67885	1344.36	TTGGATTGGGATTTGAACTGGAGGCTTAGTGTGGTTTTGAGTAGAGTATCACTTGTCCCTGGAAATGAAG	0.428571	0.571429	1.45052	1.4919	0.0413803	-15.5	0.47729
main_Ttc39b_chr4:83226065-83226135_17516	Mouse 3' UTR GCLiPP Peak	No	chr4:83226065-83226135	Ttc39b	20	688	2.75586	1936.57	CTTTGAATTGTGTAACTGTGAGTCTCTGTGTTAGACACTTTCAACAATGCTTAGCATTAATCCAAACTCT	0.357143	0.642857	0.376972	0.569394	0.192423	-11	0.72634
main_Irf2bp2_chr8:126590828-126590898_25207	Mouse 3' UTR GCLiPP Peak	No	chr8:126590828-126590898	Irf2bp2	31	1371	2.01393	2820.14	GCATTTTCTTCTTTTGTTAACGTTGTTAGGCTGTCTGTGTTTGACTCTTTGGGTGACAGTTGCTGTTCTT	0.4	0.6	1.80315	1.83823	0.0350704	-8.3	0.433016
main_Mrpl35_chr6:71815991-71816061_21029	Mouse 3' UTR GCLiPP Peak	No	chr6:71815991-71816061	Mrpl35	51	2576	2.38194	6267.07	TCTTTGTGTACATAATGCCCTTGCAAAGTGAGTATGCGTTAAACTGTAAACTGTACCAGCTGATCGGCAA	0.414286	0.585714	0.284324	0.678183	0.393859	-12	0.461119
main_Rbm3_chrX:8142474-8142544_26770	Mouse 3' UTR GCLiPP Peak	No	chrX:8142474-8142544	Rbm3	3	112	2.13122	243.801	CAAGATCATGATTGCTTAGAGATGTTTTTTATTAAAGATCACCATCCTGATTATATAGAAGAGCTTCTTT	0.3	0.7	0.419634	0.822704	0.40307	-9.9	0.345565
main_Ptbp3_chr4:59476766-59476836_17444	Mouse 3' UTR GCLiPP Peak	No	chr4:59476766-59476836	Ptbp3	15	761	1.40703	1093.65	GATCTTCAGGCACAGACTGAAGCAGCTCAAGACCATTTCTGCCTCTTCACAAAATAACTCTTCGGGAATT	0.442857	0.557143	1.31701	1.40873	0.0917183	-8.9	0.567188
main_Ube2g1_chr11:72684419-72684489_4350	Mouse 3' UTR GCLiPP Peak	No	chr11:72684419-72684489	Ube2g1	7	253	1.04384	269.737	CATCTGGGATTGCTATTAAAAATGCTATTTGTCCTATTACCCTTCTCCTTAGTCCATATTTGTTTCTTCT	0.342857	0.657143	0.477183	0.648141	0.170958	-4.4	0.440562
main_Gnb1_chr4:155558390-155558460_18826	Mouse 3' UTR GCLiPP Peak	No	chr4:155558390-155558460	Gnb1	5	189	1.62571	313.829	TTTTTTTCTCCAGAGAGGTGCCTGTCCTGTGCTTGGATAGTCAGTTGGTTATTTGTGTATGAAACAATGT	0.4	0.6	1.22508	1.31717	0.0920845	-11.1	0.471164
main_Mmgt1_chrX:56588548-56588618_26918	Mouse 3' UTR GCLiPP Peak	No	chrX:56588548-56588618	Mmgt1	92	4725	2.04508	9869.61	CGGACTCCACTCCCTGATACTGTCTAACATAAGCTGTCTTGTTTCATCATTTCTAGGATTCTGTGTGCAG	0.442857	0.557143	0.937141	1.09999	0.162845	-8.5	0.711638
main_Adh5_chr3:138455144-138455214_16960	Mouse 3' UTR GCLiPP Peak	No	chr3:138455144-138455214	Adh5	12	314	1.82498	585.295	CCTGTGATTGGCTAGAAACAGACAGGATTTACAAGCTAACCACGTCGTAGACTTCAGAAATGACTAGAAG	0.428571	0.571429	0.00357746	0.594958	0.59138	-10.4	0.347899
main_Pigm_chr1:172379906-172379976_1505	Mouse 3' UTR GCLiPP Peak	No	chr1:172379906-172379976	Pigm	60	2174	0.562608	1249.26	GCCTCGGATGCCTCAGACTCAGTGTGCAATCCCGACCAACCTCCAACTCATCCTCCTGCTCTAGCCTCTT	0.571429	0.428571	0.0195493	0.0195493	0	-6.5	0.700415
main_Tpm4_chr8:72151860-72151930_24349	Mouse 3' UTR GCLiPP Peak	No	chr8:72151860-72151930	Tpm4	55	2072	1.56788	3318.11	ACTCCAGAGAGTGTGCCCTGTCTTCCTCTTTTGTAAGAAGTTCCGCTTATTACCAGGTTTCCACCTTGCA	0.471429	0.528571	0.733958	0.868211	0.134254	-9	0.548108
main_Nucks1_chr1:131933696-131933766_928	Mouse 3' UTR GCLiPP Peak	No	chr1:131933696-131933766	Nucks1	80	3370	1.16518	4010.61	CTGGCCCTTGGCACCTCTATGGCTTACTCTCCTTCCTCTTTTCCTCTGTCTTTTTCTTTCTGGTGTGCCT	0.5	0.5	0.329746	0.645577	0.315831	-7.44	0.515408
main_Srebf2_chr15:82203902-82203972_9306	Mouse 3' UTR GCLiPP Peak	No	chr15:82203902-82203972	Srebf2	56	1695	0.617729	1069.44	ATCGCTGCCTCCTGACCACCGTCTGGGGCCTGGTCCACTTCTTTCCACCTTTTTGTCTCTTTCTCCCAGG	0.571429	0.428571	0.210113	1.10893	0.898817	-12.24	0.450609
main_Psmd12_chr11:107497723-107497793_5480	Mouse 3' UTR GCLiPP Peak	No	chr11:107497723-107497793	Psmd12	4	107	1.1075	121.036	TCTACAATGAGGCTCTGGATGCTTTTAGAAGACACAAAATTGGAGGTCATTAAAAAAGAAAGACTGTTTT	0.342857	0.657143	0.910648	1.10946	0.198817	-6.4	0.441217
main_Cisd3_chr11:97688449-97688519_5037	Mouse 3' UTR GCLiPP Peak	No	chr11:97688449-97688519	Cisd3	57	2595	0.752177	1993.63	GGGTACTGTGACTCCAGGCAGTAATGCTGAGCCACACATGGAAGGGAACCTCCAAGGACCCCATCTTGTT	0.542857	0.457143	-0.106056	0.513465	0.619521	-19.1	0.600837
main_Pip4k2b_chr11:97717041-97717111_5047	Mouse 3' UTR GCLiPP Peak	No	chr11:97717041-97717111	Pip4k2b	16	668	0.893327	609.502	TGATTCGAGGAGAAAGGATTTTAATGTAGGAGAGGGGTTACGTAGGAATAATGTCTGGACTTGATTTCTC	0.4	0.6	0.53738	0.833606	0.296225	-11.6	0.469779
main_Exosc8_chr3:54728728-54728798_16101	Mouse 3' UTR GCLiPP Peak	No	chr3:54728728-54728798	Exosc8	20	719	2.0543	1508.63	CAGAGCATGAGACACAAATGAACAGACACCACGACTGCAAAACAGCTGTAAAAATTGTATTTGTTACACT	0.385714	0.614286	1.27775	1.34882	0.0710704	-6.5	0.375989
main_Tnpo1_chr13:98843061-98843131_7544	Mouse 3' UTR GCLiPP Peak	No	chr13:98843061-98843131	Tnpo1	9	382	1.76379	688.175	TTTCATTTGTTTGCCTTTCTGTTATTTTTCCCTCTGCTTCTATGTATCTCTGTGAATAAATCCTTGTTAA	0.314286	0.685714	2.48907	2.49315	0.00408451	-2.8	0.551132
main_H3f3a_chr1:180802829-180802899_1584	Mouse 3' UTR GCLiPP Peak	No	chr1:180802829-180802899	H3f3a	1	41	3.19997	134.004	TTGTGTGTGAATTTTTAATATAAATGCAAGATGGAAAGCATTAATGCAAGCAAAATGTTTCAGTGAACAC	0.3	0.7	1.80348	1.81004	0.00656338	-7.8	0.35016
main_Rab6a_chr7:100640441-100640511_23186	Mouse 3' UTR GCLiPP Peak	No	chr7:100640441-100640511	Rab6a	10	294	1.54605	464.259	CCCTAGAGGCAGGTCAGAGGAAGTATGCATTAAGAGGGAAAGGAGAGAATGGAAATAAAAGTCACTATAA	0.414286	0.585714	1.12149	1.18645	0.0649577	-7.9	0.458477
main_Trim25_chr11:89017064-89017134_4808	Mouse 3' UTR GCLiPP Peak	No	chr11:89017064-89017134	Trim25	19	1004	1.25871	1290.76	TCTTTCTCAGGTGACAGATGTCCACCCTATTCTACTCTCTGGGGTAGCCTTCAGATCTTTGTGTTTTGAT	0.442857	0.557143	0.074	0.488676	0.414676	-12.7	0.659789
main_Mcl1_chr3:95662537-95662607_16559	Mouse 3' UTR GCLiPP Peak	No	chr3:95662537-95662607	Mcl1	51	2195	1.51473	3395.92	AATAGGGAAGAAGTGCCCTGCCTGCCAGCTTGGGAGTGATTTGTACCTGTGTATTTATCCTTGATCATAG	0.457143	0.542857	1.09569	1.11634	0.0206479	-12.4	0.530772
main_Desi2_chr1:178250817-178250887_1541	Mouse 3' UTR GCLiPP Peak	No	chr1:178250817-178250887	Desi2	12	463	1.93786	916.415	GCTTTAGATACGTGATTAGTGTGAGAGTCACATTCTCTGTGTGAAGATACATGTCTTTGAGTAAATTTCA	0.357143	0.642857	0.77207	0.87931	0.107239	-12.2	0.535706
main_Hmgb2_chr8:57514175-57514245_24150	Mouse 3' UTR GCLiPP Peak	No	chr8:57514175-57514245	Hmgb2	7	155	2.05877	325.932	TAAGAATGTGAAATTCAAGTGCAGCTCAACATTAGCTTCAGTATAAAAACTGTACAGATTTTTGTATAGC	0.314286	0.685714	2.27956	2.27956	0	-12.1	0.330881
main_Mcl1_chr3:95661669-95661739_16553	Mouse 3' UTR GCLiPP Peak	No	chr3:95661669-95661739	Mcl1	30	1542	1.6852	2654.14	TCATCCGTTCTAGTGTATATGCAGAGCCTGTTGTGTGTGTGGACTGGTTATAGATTTATAACTATGCAGG	0.414286	0.585714	0.674085	0.829408	0.155324	-15	0.434623
main_Tagap1_chr17:6955589-6955659_10627	Mouse 3' UTR GCLiPP Peak	No	chr17:6955589-6955659	Tagap1	16	516	2.36873	1248.4	CACATGGTGACACCAAATTTTGCCTGTGTGTAACCGGGTTTGTGCAATATGTAGTAAATGTATAAAATGT	0.371429	0.628571	0.251662	0.568141	0.316479	-11.3	0.567478
main_Lrrc47_chr4:154020049-154020119_18768	Mouse 3' UTR GCLiPP Peak	No	chr4:154020049-154020119	Lrrc47	126	8168	1.32096	11020.3	GTGTGCTAGGTGTCTGTATAGGTGTGGGTGTGCTGTAGATGTCTGTGTAGGTATGGGTGTGCTGTAGATC	0.5	0.5	0	0	0	-10.6	0.674122
main_Prpf38a_chr4:108564884-108564954_17639	Mouse 3' UTR GCLiPP Peak	No	chr4:108564884-108564954	Prpf38a	27	1323	1.97056	2662.79	AGCAGGGTCAAGAAGACCTGGGAATTTGAGAGGTAAAAAGATGTGATCCTTTCATTTGTAATTAAACTTG	0.371429	0.628571	0.145972	0.735014	0.589042	-12.8	0.568852
main_Edem1_chr6:108856590-108856660_21518	Mouse 3' UTR GCLiPP Peak	No	chr6:108856590-108856660	Edem1	35	1645	2.00419	3367.39	TGCCATATGATGGGACCAATAAGGAACAGGGTGTATGTGAGGAAGATTCTGGAAAACTAGTTTGTCAGTC	0.428571	0.571429	0.105634	0.514592	0.408958	-10.2	0.741368
main_Cox7b_chrX:106021800-106021870_27169	Mouse 3' UTR GCLiPP Peak	No	chrX:106021800-106021870	Cox7b	19	808	1.28538	1060.79	CAAAGGAATGGAGAGATCAGTAGTCGTGCCAGCTGGTACAATAATCAAGGAATTGTTTAAAACCAACTTA	0.385714	0.614286	1.0691	1.15262	0.0835211	-7.7	0.401375
th2_Wdr26_chr1:181176719-181176789_766	Mouse 3' UTR GCLiPP Peak	No	chr1:181176719-181176789	Wdr26	11	378	1.2943	499.705	GAGGGAATCGTTTTGATGTGATCTAGCAGAAGTAGACATCAGAAGATAGACCTACTTTGGGAATTTATAG	0.385714	0.614286	NA	NA	NA	-14.5	0.524877
main_Gtf3c2_chr5:31157154-31157224_19036	Mouse 3' UTR GCLiPP Peak	No	chr5:31157154-31157224	Gtf3c2	26	1448	0.973878	1440.33	GGGTGTTTTTGAGAGCACTTGTGAGTGGGTGTTTGGACAGTCGGAAAGGATATCTTCATGAAGGCTCCTG	0.485714	0.514286	1.31003	1.36194	0.0519155	-15.4	0.483312
main_Dcp2_chr18:44418783-44418853_12256	Mouse 3' UTR GCLiPP Peak	No	chr18:44418783-44418853	Dcp2	62	3088	0.901539	2843.48	GGTGACAGTGCCCACTTTGCAGAGATCGCCTGTTGTTGAGGACAATCACCAGAGCTTTAAGGAGGCAATA	0.5	0.5	0.548831	0.687028	0.138197	-17.4	0.631237
main_Sec11a_chr7:80915797-80915867_23033	Mouse 3' UTR GCLiPP Peak	No	chr7:80915797-80915867	Sec11a	76	4933	0.908043	4575.16	TCCATCGTGAGTAAGAAGTCGGACTCCCTGTTCCTAGGAAGCTGCTGTGCTTGTTGTTACTGAATGTTGG	0.485714	0.514286	1.19296	1.28589	0.0929296	-13.5	0.412715
cd8_Ssr1_chr13:37979390-37979460_3443	Mouse 3' UTR GCLiPP Peak	No	chr13:37979390-37979460	Ssr1	21	950	1.4933	1448.97	TAAACTACCTGAAACACACCTTTAGCATACTCAGCAAAACGCTCTCGCCACTTCCCTTATGCTAGTTTCC	0.442857	0.557143	0.0869296	0.91031	0.82338	-7.4	0.513496
main_Mfsd11_chr11:116875526-116875596_5709	Mouse 3' UTR GCLiPP Peak	No	chr11:116875526-116875596	Mfsd11	45	1854	0.945058	1789.6	AGCAACCACATGGTGGCTCACAACCATCCCCAACAAGATCTGACTCCCTCTTCTAGAGTGTCTGAAGACA	0.5	0.5	0	0	0	-10.6	0.521694
cd8_Calm3_chr7:16915505-16915575_10965	Mouse 3' UTR GCLiPP Peak	No	chr7:16915505-16915575	Calm3	42	2097	0.571158	1223.33	CCTAGAGTTGAGGGCAAGGGCAGGTAGGCGTGAGGCTGTGGACTTTGCGGAATGTTTCGGGGTTTTATTT	0.528571	0.471429	0.935662	1.04775	0.112085	-17.2	0.548979
main_Ubxn1_chr19:8875553-8875623_12986	Mouse 3' UTR GCLiPP Peak	No	chr19:8875553-8875623	Ubxn1	20	857	1.26621	1108.34	AAGAAGTGTCCCAGCTGAGGGTTCTCCATCCCACCATCTCTTTCTAACCTCTTCATCTTTGATAAAGCAC	0.457143	0.542857	1.30838	1.45289	0.144507	-5.9	0.459322
main_Ccdc115_chr1:34436772-34436842_69	Mouse 3' UTR GCLiPP Peak	No	chr1:34436772-34436842	Ccdc115	31	1320	1.70379	2297.09	TTTTTTCCTGAGCTATCCAGTTGTGTTGGGAAGGGGAATGTAATTGTTTGTGGGGTGTAAATATTTCTTC	0.385714	0.614286	0.204394	0.684789	0.480394	-9.1	0.520387
rapidmain_Cbx7_chr15:79917751-79917821_9181	Mouse 3' UTR GCLiPP Peak	Yes	chr15:79917751-79917821	Cbx7	33	1600	0.489879	800.566	CGAGTGTGCTGTCTCCCTGCCATTGGCCTGTGTAGAGATGCCCATGAACACATCCGGACACCCCAACATG	0.571429	0.428571	-0.621155	0.837211	1.45837	-10.7	0.527166
main_Nhp2_chr11:51623336-51623406_3758	Mouse 3' UTR GCLiPP Peak	No	chr11:51623336-51623406	Nhp2	80	4405	0.770542	3466.81	GTGTTGGAGGTGGAGCCTGCATCTCTGCCATCTCCTCCTGAGCTTTGATGAAGACAGTTCCAAGAATGTG	0.514286	0.485714	0.127211	0.528732	0.401521	-15.1	0.557265
main_Tardbp_chr4:148618213-148618283_18624	Mouse 3' UTR GCLiPP Peak	No	chr4:148618213-148618283	Tardbp	31	1682	0.922935	1585.57	AGTCTTCTGGCTGGGGAATGTAGGTGGTGGGGGGTGGTTAGTAGGTTGGTTATTAGGTTAGGTAGATTTA	0.471429	0.528571	0.630592	1.07265	0.442056	-10.1	0.445661
main_Ywhae_chr11:75764645-75764715_4463	Mouse 3' UTR GCLiPP Peak	No	chr11:75764645-75764715	Ywhae	11	255	1.45389	378.669	CAGGATGTGGAAGATGAGAATCAGTGAGACGAAATAAAAGCCAACAAGAGAAACCATCTCTGACTACCCC	0.442857	0.557143	1.88661	1.93692	0.0503099	-6.4	0.492856
main_Rrp1b_chr17:32061939-32062009_11055	Mouse 3' UTR GCLiPP Peak	No	chr17:32061939-32062009	Rrp1b	133	9308	1.13453	10786	GAGATGATGTTTTGCTTGTGTCACAGTAGGTCTTGTGCAGTGTCACTTGTAGTTGCATGGTTACAGCGTG	0.457143	0.542857	-0.162296	0.613028	0.775324	-18	0.44294
main_Tmed2_chr5:124549689-124549759_20021	Mouse 3' UTR GCLiPP Peak	No	chr5:124549689-124549759	Tmed2	7	258	2.22766	587.024	TGGGCACTCATGCTTTCTCTTGAGCTCGATTTAAAGACTCATCAAAACTCTTCCCCCTAAAGTTTTATAT	0.385714	0.614286	0.233155	0.601268	0.368113	-8	0.464573
main_Ctdsp2_chr10:126997331-126997401_2946	Mouse 3' UTR GCLiPP Peak	No	chr10:126997331-126997401	Ctdsp2	38	2165	0.729544	1613.24	GTAGATCCCAAAAGTGCTCTTCAGGGGTTCTGTGCTAGCTGATGCAAGGACATTAGCTCCAAAGGCTGGG	0.514286	0.485714	0.500014	0.902183	0.402169	-20	0.505052
main_Marcks_chr10:37135322-37135392_1855	Mouse 3' UTR GCLiPP Peak	No	chr10:37135322-37135392	Marcks	26	1080	2.41628	2665.38	CCATAGGAACTTCCTGCTTATCTCATGTTAGCTGTACCAGTCAGTGATTAAGTAGAACTACAAGTTGTAT	0.385714	0.614286	2.44077	2.44077	0	-12	0.430982
main_Insig1_chr5:28076821-28076891_18974	Mouse 3' UTR GCLiPP Peak	No	chr5:28076821-28076891	Insig1	35	1974	0.87603	1766.26	CTTCAGCACATGGTTCAGAGTGGAAGCAGGATGTAGAGACACTGGTCCTGGGTGTGATGAAGATGATCTT	0.485714	0.514286	0.0483521	0.54269	0.494338	-16.4	0.482427
main_Nucks1_chr1:131932041-131932111_923	Mouse 3' UTR GCLiPP Peak	No	chr1:131932041-131932111	Nucks1	6	241	1.6402	403.741	TTAGTGGATTTGTTATTCTCAAAGAGATTCAGAGCCAGTGCTTCTTTTGTCTTGATAACGGTCTTTTTTC	0.357143	0.642857	0.67293	0.823155	0.150225	-11.2	0.382722
main_Hmgb1_chr5:149048652-149048722_20543	Mouse 3' UTR GCLiPP Peak	No	chr5:149048652-149048722	Hmgb1	1	11	0.0769494	0.864542	AGTTTTTTTTTCTTGTCTATAAAGCATTTAACCCCCCTGTACACAACTCACTCCTTTTAAAGAAAAAAAT	0.3	0.7	2.45677	2.45677	0	-4.47	0.446549
main_Rps24_chr14:24495795-24495865_7736	Mouse 3' UTR GCLiPP Peak	No	chr14:24495795-24495865	Rps24	12	487	1.81977	905.176	GACTTGATGTTTTGCTGTGATGTGCAGATTTCTGAGAGGACAAATAAACTAAAAAGCTCCTACACGTCTG	0.4	0.6	0.475676	0.742183	0.266507	-8.1	0.654915
main_Szrd1_chr4:141113785-141113855_18525	Mouse 3' UTR GCLiPP Peak	No	chr4:141113785-141113855	Szrd1	3	154	0.505667	79.5379	GCACCACTGAAGAAGGAAAGGAAGAAAGGAAAACAGACTGGTGTTGGGGGAGGGGGTGTGGGAAACGGTT	0.528571	0.471429	0.50831	0.729775	0.221465	-6.9	0.586738
main_Tpd52_chr3:8929836-8929906_15899	Mouse 3' UTR GCLiPP Peak	No	chr3:8929836-8929906	Tpd52	60	3226	2.47741	8163.01	TCCTGACTCACTCCTGCTTCCTTTGCTGTGTATGTTTATGGCCTATGAGGTTGTATCTGTTACTTCTTTC	0.428571	0.571429	0.449197	0.640324	0.191127	-10.2	0.448333
main_Cbx7_chr15:79917970-79918040_9182	Mouse 3' UTR GCLiPP Peak	No	chr15:79917970-79918040	Cbx7	17	473	0.0966341	46.6853	GTGGAGCCGGAGGAGCCCAGGAGGTCCAGACCTTGCCTCAGGCAGTCACCCCAGCTTTCTGGTGGTGTCC	0.657143	0.342857	-0.122887	0.649901	0.772789	-24.1	0.583344
main_Cmtm7_chr9:114756879-114756949_26560	Mouse 3' UTR GCLiPP Peak	No	chr9:114756879-114756949	Cmtm7	35	1239	0.939354	1188.75	AGAAGAAACACTATGTGGCCATCCTGTCTCCTGCCCCTATCTCTGCCTTTGTCACTGTGGGTGGGGGTGG	0.557143	0.442857	0.209408	0.524817	0.315408	-17.7	0.627014
main_Vps29_chr5:122362974-122363044_19884	Mouse 3' UTR GCLiPP Peak	No	chr5:122362974-122363044	Vps29	3	174	0.642129	114.12	AATAATTAAACACTTAAGAGGCACACAGTTGTATCACTTTTATAATACTTTGCACTAAAAAGTCTTCTCT	0.285714	0.714286	1.48746	1.60031	0.112845	-7.3	0.467175
main_Crebzf_chr7:90444154-90444224_23098	Mouse 3' UTR GCLiPP Peak	No	chr7:90444154-90444224	Crebzf	6	183	0.545794	102.016	CCTTAGTGGGACATCGTCACCGGACGCATTTCAGAGGCGGAAAAAAAAGTAATATTAAATCTTTTAAGTG	0.4	0.6	1.98375	2.00434	0.0205915	-8.5	0.560928
main_Tgoln1_chr6:72610308-72610378_21103	Mouse 3' UTR GCLiPP Peak	No	chr6:72610308-72610378	Tgoln1	5	159	2.34236	380.398	AGAGTTTCTCTCTTGTATCTATTACGTTTCTCTATCTATCCTTCACTTTCTCTAATCATCTGAAAACTCC	0.342857	0.657143	-0.133549	0.58338	0.71693	-3.17	0.747868
main_Otud4_chr8:79674528-79674598_24418	Mouse 3' UTR GCLiPP Peak	No	chr8:79674528-79674598	Otud4	21	767	2.50512	1962.51	TGAATAACGTCTTCTCTTTACTATTACACACGAGGCAGCCTATTAACCTGTGTCTTAGAATTGTTGTATA	0.357143	0.642857	2.1748	2.1748	0	-7.2	0.54678
main_Ski_chr4:155156327-155156397_18806	Mouse 3' UTR GCLiPP Peak	No	chr4:155156327-155156397	Ski	16	562	1.54529	887.02	CATGTATTTAGAACTGCACTTTGTCAGAACCTTCCAGTCCCTTCTTACTCCCCGGTTAACTGAGGTTTTT	0.428571	0.571429	1.34894	1.43807	0.0891268	-9.1	0.454747
main_Ap2s1_chr7:16749115-16749185_22278	Mouse 3' UTR GCLiPP Peak	No	chr7:16749115-16749185	Ap2s1	3	89	0.0380424	3.45817	GCCCAGAGGAAGGACCCGGCAGGGTCTAGGCCACAGGGGAGGAGGCCAGAACCCACTGCCTCTGGGCCCT	0.7	0.3	0.647493	0.898563	0.25107	-34.8	0.468431
main_Gmfb_chr14:46809178-46809248_7942	Mouse 3' UTR GCLiPP Peak	No	chr14:46809178-46809248	Gmfb	3	96	1.93095	189.335	AAGGTCTGAGTTTTAAACAGTGATTTGTTCTGGTATTGACACAATTATGTTAGGAAAAAAGCTGGTTGAC	0.342857	0.657143	1.14986	1.20569	0.055831	-8.3	0.499715
main_Zcchc17_chr4:130316103-130316173_18076	Mouse 3' UTR GCLiPP Peak	No	chr4:130316103-130316173	Zcchc17	29	1678	1.35189	2316.97	TGTCTGTCACAGTGTGAGTGACTGGTTCCATTTCAAGCCTCTGCTTAAACTCCTGGCATAAATGGAAATG	0.442857	0.557143	0.851099	1.01206	0.160958	-16.9	0.507341
main_Lsm12_chr11:102163651-102163721_5334	Mouse 3' UTR GCLiPP Peak	No	chr11:102163651-102163721	Lsm12	2	46	1.8769	88.1833	GTGGATATACTTGCCTTCTGAATGATTGAAAGAAACTTTTACATCTTTTCTTCCAAAATAAAAGTAACAA	0.285714	0.714286	1.7011	1.71403	0.0129296	-4.7	0.492064
main_Psat1_chr19:15905553-15905623_13137	Mouse 3' UTR GCLiPP Peak	No	chr19:15905553-15905623	Psat1	16	473	1.99711	964.829	CTCACGAGCGTTTTGGATCTGTGTACTGCAATTCCCATAAAGAGATAGGTGTGTTATGCTGTGTTTATGT	0.414286	0.585714	0.293155	0.668845	0.37569	-13.3	0.380375
main_Cdc27_chr11:104504139-104504209_5398	Mouse 3' UTR GCLiPP Peak	No	chr11:104504139-104504209	Cdc27	7	226	1.69289	390.773	TTGTATATGTAAGTCAAGCTGTGAAAATAAGGTGGATTACAGACGATGTGGAAGAATGTTTTAGCCTGTA	0.357143	0.642857	1.07417	1.18386	0.10969	-5.6	0.454708
main_Bnip3l_chr14:66987012-66987082_8209	Mouse 3' UTR GCLiPP Peak	No	chr14:66987012-66987082	Bnip3l	9	469	1.91127	915.55	GACAGACAGGAAACAGAAGAGTAGAACATACTGGCAGAGTTTTACATTAGGATATTGCTGTCTTTTCTAC	0.385714	0.614286	0.697648	0.84562	0.147972	-12.6	0.513427
main_Dnaja2_chr8:85538888-85538958_24590	Mouse 3' UTR GCLiPP Peak	No	chr8:85538888-85538958	Dnaja2	5	113	2.62173	302.59	GTATCTGCTTGATTTTTATCAGTTTTGTGTAGACTTTATGTTTCATATTTTAAACTCAAATCCAGCATTG	0.285714	0.714286	1.8288	1.82982	0.00101408	-11.5	0.383537
main_Klf13_chr7:63887691-63887761_22851	Mouse 3' UTR GCLiPP Peak	No	chr7:63887691-63887761	Klf13	60	2823	1.68689	4863.91	TGGTTAGAGACAGTGCTGGCAGGTCTATGTGTAGCTATGTTGTGATCGGGAAGAGATACTTTGTAGGTCA	0.457143	0.542857	0.0429296	0.577408	0.534479	-14.5	0.55545
main_Mllt6_chr11:97682272-97682342_5002	Mouse 3' UTR GCLiPP Peak	No	chr11:97682272-97682342	Mllt6	38	1898	2.98753	5791.57	TGTGAGTGTGTGAGTGTGTGTGTGAGTGAGAGAAAAAGAGAGAGATGGTTAGTCTGTTTAACCTGTCTGT	0.428571	0.571429	-0.0412958	0.739521	0.780817	-7.8	0.446652
main_Actr3_chr1:125393885-125393955_811	Mouse 3' UTR GCLiPP Peak	No	chr1:125393885-125393955	Actr3	18	528	1.24081	669.156	AGATAATCTTTCTGATGACCTGTTTTTGTCTGAATGGATGGTTCTGAGGTTTTTAACCAAACATGATCAT	0.342857	0.657143	1.82192	1.82192	0	-9	0.377453
main_Nfyb_chr10:82750117-82750187_2640	Mouse 3' UTR GCLiPP Peak	No	chr10:82750117-82750187	Nfyb	5	217	1.04148	230.833	TTTTGTACGAGAGTTTGTTGCTCTGTATGACGCCTGTATGCATTGTATATTGCAATTTATTACTGTCAGA	0.357143	0.642857	2.32434	2.38301	0.0586761	-15.3	0.468139
main_Ttll4_chr1:74697922-74697992_503	Mouse 3' UTR GCLiPP Peak	No	chr1:74697922-74697992	Ttll4	68	3085	1.32824	4185.25	AGAGAAGACAGTGACAGTCAAGCAGCTTTATAAAGCAGGGTTTGGTTTCTACACTGAGAGCCATGTGTGA	0.442857	0.557143	1.33977	1.40659	0.0668169	-11.5	0.707866
main_Dek_chr13:47085737-47085807_7139	Mouse 3' UTR GCLiPP Peak	No	chr13:47085737-47085807	Dek	5	221	1.0954	247.259	TTTTAGTGAACTTAATGTTAGCTTGCTTAAGACATTACTTTTAATCAAAGCAAAAACTATTATAACCAGC	0.271429	0.728571	0.938761	1.11408	0.175324	-5.3	0.418999
main_Dazap2_chr15:100620622-100620692_9703	Mouse 3' UTR GCLiPP Peak	No	chr15:100620622-100620692	Dazap2	51	2730	1.99178	5553.82	ATCGACTGTTATGGAAGTTCAGCGTTGTATGTCTCTCTACACTGTGGTGCACTTAACTTGTGGATTTTTT	0.4	0.6	2.62039	2.62039	0	-9.7	0.468617
cd8_Hnrnpa1_chr15:103244333-103244403_4802	Mouse 3' UTR GCLiPP Peak	No	chr15:103244333-103244403	Hnrnpa1	35	1124	0.969946	1113.53	CAAGCACAGTGGTGGCAGGGCCTAGCTGCTACAAAGAAGACATGTTTTAGACAATACTCATGTGTGTGGG	0.485714	0.514286	2.42756	2.42756	0	-15.4	0.406738
main_Lin7c_chr2:109898523-109898593_14759	Mouse 3' UTR GCLiPP Peak	No	chr2:109898523-109898593	Lin7c	4	118	0.738845	89.0478	AAAGGCAGCTATTGATAAATGATTGGGACTATGGTCTACTAAAAGCTGAAATCAAAGTGATTAATTTTCA	0.314286	0.685714	0.435817	0.655282	0.219465	-7.8	0.43292
main_Gtf2a2_chr9:70022597-70022667_26082	Mouse 3' UTR GCLiPP Peak	No	chr9:70022597-70022667	Gtf2a2	12	707	1.28822	930.247	GTCCCGCAGAGAGAAGCATGCGACTCTGTTCTCGTAATGACCTTTAGTACACAGCATAAAGAAATGTAAC	0.442857	0.557143	0.665803	0.872817	0.207014	-8.3	0.426202
main_Slc25a38_chr9:120124238-120124308_26625	Mouse 3' UTR GCLiPP Peak	No	chr9:120124238-120124308	Slc25a38	9	254	1.66956	433.136	GAGGAGAGAATTGCTGCAAGTTGTCCTGATTTCCTCACATGCACCCAGACCCAATAAACAAATAAATGTA	0.414286	0.585714	0.033169	0.387845	0.354676	-10	0.627941
main_Eif2s2_chr2:154872470-154872540_15316	Mouse 3' UTR GCLiPP Peak	No	chr2:154872470-154872540	Eif2s2	13	415	2.35984	1000.28	CTTTAACAACTGTCAGAGAAACGTGATGGGGGTAAGGAGGTACTTTTTAAAATCGTTCATAGACTTCTGT	0.385714	0.614286	2.1771	2.21777	0.0406761	-11.6	0.481656
main_Rab14_chr2:35181267-35181337_14213	Mouse 3' UTR GCLiPP Peak	No	chr2:35181267-35181337	Rab14	36	985	1.45399	1462.81	GATTCTACTCCATCTTTGCACTGTGGCATACCTGCTGATTTTCTTAACTGTTCTTGTGTAATCAACGCGC	0.428571	0.571429	1.73968	1.75635	0.0166761	-5.4	0.47393
main_Pcna_chr2:132249511-132249581_15047	Mouse 3' UTR GCLiPP Peak	No	chr2:132249511-132249581	Pcna	32	1204	1.03485	1272.61	AGATTGCTCCTGAGATGCCAGCGTGTCCTGAGGTCTTTTCTGTCACCAAGTTTGTACCTGAGTATTCTTA	0.457143	0.542857	0.849352	0.960648	0.111296	-11.5	0.383124
main_Tmem167_chr13:90104789-90104859_7464	Mouse 3' UTR GCLiPP Peak	No	chr13:90104789-90104859	Tmem167	7	162	2.21016	365.701	GCTTCAAAATAATGTCTTCACAGAATGGTACCTTCTAGCGACTGGCCTATTTTTATTGAGAAAAAAACTT	0.342857	0.657143	0.497	0.574775	0.0777746	-6	0.504323
main_Atf1_chr15:100260110-100260180_9683	Mouse 3' UTR GCLiPP Peak	No	chr15:100260110-100260180	Atf1	43	2595	1.05357	2792.47	CTGCAGGAAGCTACTGTCTCAATTGGAAGCTCCGAAAAGATAGAGTGCTCAAGGAATGGACTTTCAGCAG	0.471429	0.528571	0.493901	0.738915	0.245014	-17	0.543962
main_Hsbp1_chr8:119348145-119348215_25036	Mouse 3' UTR GCLiPP Peak	No	chr8:119348145-119348215	Hsbp1	33	1109	0.739588	837.741	CACAGCCTGCATAGCCTAGAGTACCCCTACACCCCATCCCTCAAACTTGCTATCTTCACATCCTGGTCAG	0.528571	0.471429	0.552254	0.795268	0.243014	-4.1	0.503832
main_Ago2_chr15:73101029-73101099_8807	Mouse 3' UTR GCLiPP Peak	No	chr15:73101029-73101099	Ago2	35	1284	0.464094	608.638	TTGTCATGGGGACCTGCCACCTCTGACCAAGCTGTCCTGTGGCTGTCTGCTTTGCTGTCCAGGAGGTCAT	0.571429	0.428571	-0.229817	0.645986	0.875803	-19.4	0.574878
cd8_Rab6a_chr7:100639439-100639509_11471	Mouse 3' UTR GCLiPP Peak	No	chr7:100639439-100639509	Rab6a	28	1089	1.65247	1838.02	TCATCATTGCTGCCTGTTTCGTGGAGGTGATCTATTAGCTTCACAAGCACAAAAAAGTCAGTGTCTTTAT	0.4	0.6	2.1543	2.1543	0	-15.8	0.529116
main_Tmx3_chr18:90541202-90541272_12586	Mouse 3' UTR GCLiPP Peak	No	chr18:90541202-90541272	Tmx3	54	2306	2.27358	5354.97	AGTCACAACCTCGCATCTTTCATCAGAATGCAGTCGTGTCTAAGAGTGGGTATTTTGTGATAATGTTTAC	0.4	0.6	0.0436901	0.590423	0.546732	-14.2	0.561192
main_Ostf1_chr19:18581186-18581256_13144	Mouse 3' UTR GCLiPP Peak	No	chr19:18581186-18581256	Ostf1	44	1833	1.23526	2312.65	CGCTTTGATTGTTGCCTAAACTTCTTTTGCTTTTGCCATTCCGGAGCCTGGGTTGTTTGCCAGAAGAGTA	0.457143	0.542857	1.17548	1.25277	0.0772958	-11.2	0.489262
main_Etf1_chr18:34904869-34904939_12088	Mouse 3' UTR GCLiPP Peak	No	chr18:34904869-34904939	Etf1	24	807	1.24187	1023.62	CCAAGGAGCATACCCGTGGTGGAGTCCAACAGATCCCTGCCTTACAATTGGAGCATTTCCAGAACTTAAT	0.485714	0.514286	2.42706	2.42894	0.00188732	-11.3	0.429819
main_Agps_chr2:75926133-75926203_14437	Mouse 3' UTR GCLiPP Peak	No	chr2:75926133-75926203	Agps	8	379	1.63035	631.116	CAGCTACATTTGTTTGTTGGTTTAAAATGAGTTGGTTTTTGTTCTGTGCTTTGTTTCTACATCTATAGAT	0.314286	0.685714	1.1869	1.27927	0.0923662	-11	0.531919
main_Mid1_chrX:169989738-169989808_27351	Mouse 3' UTR GCLiPP Peak	No	chrX:169989738-169989808	Mid1	30	565	0.540825	312.1	AGTCATCCCCCTGCCTCACACGGTCACTCAGGGTCATCCCCCTGCCTCAGAAAATCACTCACAGTCATCC	0.571429	0.428571	0	0	0	-8.7	0.501847
main_Wasf2_chr4:133197239-133197309_18171	Mouse 3' UTR GCLiPP Peak	No	chr4:133197239-133197309	Wasf2	44	1816	0.58729	1089.32	CACCACCTTGCTGTGCATGATGATGCTGACCCACCCCCTTTACCTCCCTTCCCAGAACTGATACACGGGT	0.557143	0.442857	0.443366	0.858887	0.415521	-6.5	0.607951
main_Msi2_chr11:88342163-88342233_4800	Mouse 3' UTR GCLiPP Peak	No	chr11:88342163-88342233	Msi2	25	1075	0.119683	131.41	CGTTGCTGATGTCCTGTCCCCAGCCCCTGTCCATCTCCCCCACACTCCCATCACCTCATAGAACGCTCTT	0.585714	0.414286	0.82893	0.900535	0.0716056	-3.5	0.616471
rapidmain_Ech1_chr7:28832124-28832194_22558	Mouse 3' UTR GCLiPP Peak	Yes	chr7:28832124-28832194	Ech1	21	684	0.64102	447.833	GAGAGAGGAGGACTCCACGGAGCCAGGCCTCCTCCCATGGGGTGTCCCAGTGTATAACTTTATGACTTAG	0.557143	0.442857	-0.41562	0.61407	1.02969	-19.7	0.523097
main_B2m_chr2:122152714-122152784_14916	Mouse 3' UTR GCLiPP Peak	No	chr2:122152714-122152784	B2m	4	121	1.518	187.606	GCACGCAGAAAGAAATAGCAATGTACACATCACCTTCTTTATATCTTACTTTAAATATTTTATGCATGTT	0.3	0.7	-0.0898732	0.799169	0.889042	-2.9	0.581337
main_Adss_chr1:177763953-177764023_1536	Mouse 3' UTR GCLiPP Peak	No	chr1:177763953-177764023	Adss	35	959	1.55961	1527.65	GCACAGTCCTTGCCATGGTTAGAACTGTATAATCCCCAGTTGACATCTAGAACTTCCAGTGTAGCTTTTC	0.442857	0.557143	0.488394	0.750845	0.262451	-8.7	0.466254
main_Dctn3_chr4:41714955-41715025_17278	Mouse 3' UTR GCLiPP Peak	No	chr4:41714955-41715025	Dctn3	21	893	1.15734	1055.61	AGGTTGACCTTAGAGTCATGATCTGTACTCCCTGTCAATGTATTTATTCCAGTGACAATAAACTTGAACG	0.385714	0.614286	0.562972	0.815225	0.252254	-11.7	0.611244
main_Samd4b_chr7:28400464-28400534_22532	Mouse 3' UTR GCLiPP Peak	No	chr7:28400464-28400534	Samd4b	21	575	0.490201	287.892	GCTGGTGCTGGGGCCCAGGTGGAGGGAGGGAATTTGGGATTCAGGCTGTGGGGAAGCCAGGGTCCCCTAT	0.642857	0.357143	0.916141	0.974761	0.0586197	-23.8	0.556609
main_G3bp1_chr11:55500209-55500279_3945	Mouse 3' UTR GCLiPP Peak	No	chr11:55500209-55500279	G3bp1	3	153	1.72055	268.873	ATTTTAAATTGTGATGTAGCCTGTCAATGTCTAGAACACAGCTAAGGACTTTTGTTGACCTGTTAGAAAT	0.342857	0.657143	0.924211	1.00646	0.0822535	-9.3	0.374509
main_Wasf2_chr4:133197002-133197072_18168	Mouse 3' UTR GCLiPP Peak	No	chr4:133197002-133197072	Wasf2	15	397	0.1727	70.0279	GGAGCTGTGCTGGGGAGGCAGTGTAGAGAGGAGCTGTGGGGCAGCCAGCCTTGGCAGGTGCAGTTTGCAG	0.642857	0.357143	0.93007	1.03542	0.105352	-23.1	0.5889
main_Gm12657_chr4:94599916-94599986_17548	Mouse 3' UTR GCLiPP Peak	No	chr4:94599916-94599986	Gm12657	71	3914	1.06032	4238.85	GATTGCGAGTGGAGACATAGGGGACAGAATCAGGTATTGGCGTTTCTCCACGTTCATTTGTGTGTGAATT	0.457143	0.542857	0.32462	0.520873	0.196254	-13.5	0.429705
main_Celf1_chr2:91016604-91016674_14558	Mouse 3' UTR GCLiPP Peak	No	chr2:91016604-91016674	Celf1	85	5141	1.08864	5716.35	GATGTGGCGTCAAGTACATCGTCCAAATCCCTGTCTCTTCAGCTTCTCTGATGCTTGAACTCTCACCTTT	0.471429	0.528571	2.6733	2.6733	0	-9.8	0.60373
main_Ing1_chr8:11562375-11562445_23861	Mouse 3' UTR GCLiPP Peak	No	chr8:11562375-11562445	Ing1	22	1099	1.91008	2144.06	GGGTTGGGGAGTGACTTGGAAGTAAGCTAACAGCTGTATAAAGAAGAGATTTCATTTGGCTGTTTTGACA	0.414286	0.585714	0.345915	0.577465	0.231549	-9.4	0.485799
main_Fam168b_chr1:34816338-34816408_102	Mouse 3' UTR GCLiPP Peak	No	chr1:34816338-34816408	Fam168b	39	2031	1.76374	3658.74	GCTGTATTCTCCCACAAAGACTTCAGCTGTGTGCTGTGAAGAGTGTTGTACATTTAAGACTGGTTACAAG	0.428571	0.571429	0.506	0.803944	0.297944	-13	0.661405
main_Cdyl2_chr8:116572618-116572688_24989	Mouse 3' UTR GCLiPP Peak	No	chr8:116572618-116572688	Cdyl2	41	2942	1.44315	4336.54	ACACTTCCGAACATACTGAGGATCTGTGATGACTGAGGTAGACACTGACCATTTCTGAGGTGGGATTTAC	0.457143	0.542857	-0.0345915	0.560085	0.594676	-12.6	0.626366
main_2010012O05Rik_chr19:46701586-46701656_13477	Mouse 3' UTR GCLiPP Peak	No	chr19:46701586-46701656	2010012O05Rik	18	697	0.967884	689.04	GCCTGTCCTACACAACCATCAGGCCGTGGCCTTGGTCTCCATCTTCATCTCCAGAGAATCATCTAGAAAA	0.5	0.5	0.193761	0.718099	0.524338	-10.7	0.623963
main_Cited2_chr10:17724979-17725049_1774	Mouse 3' UTR GCLiPP Peak	No	chr10:17724979-17725049	Cited2	20	621	2.96732	1882.11	CTTGTTTCGTTTTTTGTAGCCTTGACATTCACCTCCCTTATGTAGTTGAAATATCTAGCTAACTTGGTCT	0.371429	0.628571	1.89887	1.8993	0.000422535	-5.5	0.542417
cd8_Zdhhc18_chr4:133608469-133608539_8857	Mouse 3' UTR GCLiPP Peak	No	chr4:133608469-133608539	Zdhhc18	32	1803	1.1699	2154.44	TTTCTTTGAACTGTCCCATAGCTGTGCCCTCTGCTCCCCAAACCTAGGTTCCCACAGTTTAGGCCTTAGG	0.514286	0.485714	0.755803	0.929239	0.173437	-9.7	0.561905
main_Gabarap_chr11:69994696-69994766_4289	Mouse 3' UTR GCLiPP Peak	No	chr11:69994696-69994766	Gabarap	49	2153	2.28457	5023.85	AGCCTCCATACATCTCTTTCTCCCCTTGTTTACCCTCCATTCCCACTCTGATTTAGACTTCTTGATTGTC	0.442857	0.557143	0.309789	0.58562	0.275831	-0.5	0.477428
main_Zfp36l1_chr12:80108242-80108312_6305	Mouse 3' UTR GCLiPP Peak	No	chr12:80108242-80108312	Zfp36l1	3	37	1.14384	43.2271	CTTTCCTTTTTTCCACAGTTTTAATATATTATTCTTCAACAACATTTTTGTAACTTTACACTTTTTTTGG	0.242857	0.757143	2.24285	2.24285	0	-1	0.52282
main_Npc2_chr12:84756516-84756586_6364	Mouse 3' UTR GCLiPP Peak	No	chr12:84756516-84756586	Npc2	73	3771	0.750374	2890.16	GGCAGTCTGCCGCAGAAATTTGTCTCTGAGTGGCTGTGTCTTTGTGGTTAGCTCTCGTTCTTTGGTAGTT	0.485714	0.514286	0.0279155	0.706535	0.67862	-15.8	0.560734
main_Mrpl18_chr17:12911551-12911621_10658	Mouse 3' UTR GCLiPP Peak	No	chr17:12911551-12911621	Mrpl18	14	476	2.32061	1128.23	CAAAGGAAAGCATCTGCATTAAAAGGAAGAAAGGAAGGAAGGAAGAAAAGAAGGAAGGAAGAAGCATTTG	0.385714	0.614286	0.0624225	0.314254	0.251831	-1.59	0.400518
main_Pomp_chr5:147875659-147875729_20499	Mouse 3' UTR GCLiPP Peak	No	chr5:147875659-147875729	Pomp	20	1130	0.862923	995.952	GGTTGTGGGTCAGTTGAGAGCCTAGAGGTGGTTCTGAGGTTATAGCAAAGCTCAAATTCTGAAAATGTGT	0.442857	0.557143	0.297085	0.72038	0.423296	-13.7	0.418795
main_Bhlhe40_chr6:108666379-108666449_21507	Mouse 3' UTR GCLiPP Peak	No	chr6:108666379-108666449	Bhlhe40	38	1169	0.556813	664.833	CCAGAGTCCTTGTTTCCTTGACTTGCTCCACCAGCCCTGCACCAGCTTTCCAAATGCACTCTGCTTGTGT	0.528571	0.471429	0.923296	1.1011	0.177803	-10	0.509045
main_Ube2d3_chr3:135465809-135465879_16937	Mouse 3' UTR GCLiPP Peak	No	chr3:135465809-135465879	Ube2d3	8	558	1.70806	973.474	TGACCTGTTCTTGTTCTACAGAGAATGGAAATTGGAAGTCAAACACCCTTTGTATTCCAAAATAGGGTCT	0.385714	0.614286	2.28493	2.28493	0	-16.8	0.394757
main_Dazap1_chr10:80288124-80288194_2379	Mouse 3' UTR GCLiPP Peak	No	chr10:80288124-80288194	Dazap1	1	15	1.41074	21.6136	GTGTGGGAAGCGGGAGCCCTGGCTCCCGCCGGCGCGGGCTGGGGTGCGGGCAGAGACTACTGCGTGCATT	0.728571	0.271429	0.709831	1.03955	0.329718	-35.4	0.462537
main_Mesdc2_chr7:83899077-83899147_23057	Mouse 3' UTR GCLiPP Peak	No	chr7:83899077-83899147	Mesdc2	87	4885	0.865157	4316.66	TCACAGTGTGAAGAATTGCCCTACCCTGCTGCCAGTACTTTGTCCCAGTGAAGCTACTGTTGGTCATTGG	0.5	0.5	-0.195014	0.632141	0.827155	-11.1	0.460856
main_Ensa_chr3:95628858-95628928_16538	Mouse 3' UTR GCLiPP Peak	No	chr3:95628858-95628928	Ensa	8	255	2.41319	628.522	TTGGGTAAATTGAAACTTGTACACCCTCATGATAGCCCAGTAGAGACCCAAGAGTAGGAAAGACTAGGAG	0.442857	0.557143	0.676	0.836732	0.160732	-7.7	0.534856
main_Rap1a_chr3:105728766-105728836_16735	Mouse 3' UTR GCLiPP Peak	No	chr3:105728766-105728836	Rap1a	33	1036	2.51482	2661.06	CAAGTTCCCTGGAGACAAAGTTGCTCTGTGTATATCTCTTGGAAATAAGACATAGTATTTCTCCTTTGCA	0.385714	0.614286	2.28045	2.28127	0.000816901	-10.4	0.471713
main_Rpl6_chr5:121208910-121208980_19818	Mouse 3' UTR GCLiPP Peak	No	chr5:121208910-121208980	Rpl6	15	487	1.56427	778.088	TATCCTCACAAACTGGTCTTCTAAATTGTTAACCTAATTAAACAGCTTCATAGGTTCTTTTGGTGTCCTT	0.342857	0.657143	0.515676	1.22314	0.707465	-7	0.712919
main_Aldoart1_chr4:72851272-72851342_17500	Mouse 3' UTR GCLiPP Peak	No	chr4:72851272-72851342	Aldoart1	22	969	1.39676	1382.4	GAATCTCTCTTCATCTCTAACCATGCCTACTAACCAGAGCTAATCTAATGCTGCTGCATCAACACCCCAG	0.457143	0.542857	0.158324	0.351141	0.192817	-4.7	0.851125
main_Arf1_chr11:59212374-59212444_4046	Mouse 3' UTR GCLiPP Peak	No	chr11:59212374-59212444	Arf1	50	1557	0.338142	537.745	CAGAAGCTGTCTCCATGGGTTGGTCACAGTGTGCATCGCACCGTGCTGTACATGTGCAGACGCAGCCTGC	0.585714	0.414286	1.80465	1.81718	0.0125352	-20.4	0.577706
main_Tmem167_chr13:90105613-90105683_7465	Mouse 3' UTR GCLiPP Peak	No	chr13:90105613-90105683	Tmem167	58	3775	0.800478	3086.42	TAGACCATCAGCTTTGACATCGTGCTTGAAGCTGTGGAGGACAGTGTAGTAGTCTAACATCTAGGAACGC	0.471429	0.528571	-0.271465	0.519972	0.791437	-15	0.684045
main_Cpne3_chr4:19522491-19522561_17160	Mouse 3' UTR GCLiPP Peak	No	chr4:19522491-19522561	Cpne3	14	454	2.88052	1335.72	CATATATGGCCTTTGCTTTACTGAGTAAACAAGACACTCAAACTTCTGTGGGCATCAAATGATAGGTCAT	0.385714	0.614286	0.125803	0.539915	0.414113	-12.1	0.583112
main_Cnot3_chr7:3660982-3661052_22117	Mouse 3' UTR GCLiPP Peak	No	chr7:3660982-3661052	Cnot3	8	215	0.161415	35.4462	CCTACCCTGGGGGCCTGGGGGCAAGGGCTGCCCCCTCCTCCCCTCCCCAGTGAGGGACATTTTTTGGTAA	0.657143	0.342857	1.78242	1.78434	0.00191549	-30.3	0.546996
main_Rtf1_chr2:119733816-119733886_14851	Mouse 3' UTR GCLiPP Peak	No	chr2:119733816-119733886	Rtf1	35	1465	0.435066	651	GCCAGAGAGTCTCGCTCATTCCACAGGCACAGCTTCTTGACTGAACGTAGCACATCTCGTCCCCACCCAC	0.571429	0.428571	0.292507	0.841606	0.549099	-12.3	0.702368
main_Eif4a2_chr16:23113502-23113572_10164	Mouse 3' UTR GCLiPP Peak	No	chr16:23113502-23113572	Eif4a2	3	54	1.30101	71.757	TAGAGTTAGACTGTTGGGGGTGGGTATAAAAGATGGGGTCTGTAAAATCTTTTTTTCTTAGAAATTCATT	0.342857	0.657143	2.27675	2.27765	0.000901408	-7	0.468622
main_H3f3b_chr11:116023103-116023173_5643	Mouse 3' UTR GCLiPP Peak	No	chr11:116023103-116023173	H3f3b	43	2643	3.14238	8482.89	CTTGCTTTTCATGATGCATGTTTCTGTATGTTAATGACTTGTTGGGTAGCTATTAAGGTACTAGAATTGA	0.342857	0.657143	2.07911	2.07911	0	-12.7	0.374281
main_Ppat_chr5:76914076-76914146_19325	Mouse 3' UTR GCLiPP Peak	No	chr5:76914076-76914146	Ppat	33	1446	1.99786	2950.68	TAGCTCGCAATCATGTTTGTTCTGCTTTATGTTGTTAGGCAGGCCTGGTGACATTTTATTTTTAGTTTTT	0.357143	0.642857	0.312282	0.587324	0.275042	-11.3	0.4561
main_Coa5_chr1:37418585-37418655_160	Mouse 3' UTR GCLiPP Peak	No	chr1:37418585-37418655	Coa5	1	13	3.77644	50.1434	CTTAAAGATTAATTGGCATTTTTTTCTCAACGTGTTTGTCCTTTTCAATCTCTTGCTACTCTATATAGCA	0.314286	0.685714	-0.0991127	0.627225	0.726338	-6.8	0.538171
main_Purb_chr11:6469030-6469100_3368	Mouse 3' UTR GCLiPP Peak	No	chr11:6469030-6469100	Purb	16	796	1.6227	1319.29	ACAGGTGTGACCTTTCCCCACCTTCAGGAACTCTTCACTGGCTAACGTTTTCAACACAATTTTTATTTCT	0.414286	0.585714	0.0836761	0.559535	0.475859	-8.1	0.586138
main_Dido1_chr2:180682247-180682317_15849	Mouse 3' UTR GCLiPP Peak	No	chr2:180682247-180682317	Dido1	26	1702	1.31492	2285.85	TTGAGTAGTTTGAGATGAGAGGTCTGGTGTTCCTTCAGTTACAGCAGCTCTACAACAGCAGCATTGTGAA	0.442857	0.557143	-0.158268	0.58869	0.746958	-10.3	0.54133
main_Cyp51_chr5:4082539-4082609_18916	Mouse 3' UTR GCLiPP Peak	No	chr5:4082539-4082609	Cyp51	29	1040	1.16386	1236.3	GGCAGCGATCTTGAACCTTGCCTTGATAACCTTAATTCCTAAAAGTAATAAAATCTAAAGAGTGCTTATG	0.357143	0.642857	0.0647465	0.566803	0.502056	-5.4	0.470021
cd8_Srebf2_chr15:82204231-82204301_4557	Mouse 3' UTR GCLiPP Peak	No	chr15:82204231-82204301	Srebf2	108	6623	1.43051	9676.82	GCCCCTCCCAGTCCTCTAGAGACTGTCTCCTTTCTGCCTCTGGTTCTCTTTGTTGTTGTTACGTTTCATT	0.485714	0.514286	-0.148155	0.559732	0.707887	-7	0.607414
main_Cs_chr10:128361666-128361736_3084	Mouse 3' UTR GCLiPP Peak	No	chr10:128361666-128361736	Cs	43	1905	1.99236	3876.61	ATGCTATCAGATGATCTTAAATGGCGTAGTATTTATTGTGACTGGCACCCAACATTTGAGTTATTTCTCC	0.371429	0.628571	0.463732	0.749479	0.285746	-9.9	0.526833
main_Sox12_chr2:152396488-152396558_15201	Mouse 3' UTR GCLiPP Peak	No	chr2:152396488-152396558	Sox12	11	227	0.469832	108.932	TTTCTCCCTGACATCTAAGCCCCTCCCCATTCAGTCCTGTCCCGCGTAGCCACCAGCAGCCAGCCCCCCT	0.628571	0.371429	1.26596	1.30204	0.0360845	-2.5	0.631093
main_Fyttd1_chr16:32906229-32906299_10278	Mouse 3' UTR GCLiPP Peak	No	chr16:32906229-32906299	Fyttd1	3	65	1.06782	70.8924	AAAAAAAAAAATGTGGCTCTCAGGATTAGTCTCAGGCCAAAATGTGTTAGGGCTGTAAATGCTTATTTAC	0.357143	0.642857	0.437986	0.695451	0.257465	-9.6	0.496231
main_Prr13_chr15:102462502-102462572_9778	Mouse 3' UTR GCLiPP Peak	No	chr15:102462502-102462572	Prr13	1	13	0.716221	9.50996	ATGTGATTTTTTTTTTTCTTCCACTTTCTTTTGTAACACTTGTGACTTGGGTTTGTGACAGTTTGTGATG	0.328571	0.671429	0.453014	0.722085	0.26907	-6.1	0.454217
main_Poldip3_chr15:83127705-83127775_9368	Mouse 3' UTR GCLiPP Peak	No	chr15:83127705-83127775	Poldip3	98	4529	0.852798	3944.91	ATGAGGTACCAGGGAGAGCTTCCTCGCTGGACGGGACCCACCTTTCTGTGTTGTTTACACCTTGCCCTTC	0.557143	0.442857	0.561718	0.899465	0.337746	-18	0.606336
main_Nme1_chr11:93959022-93959092_4828	Mouse 3' UTR GCLiPP Peak	No	chr11:93959022-93959092	Nme1	125	7199	1.74862	12857.5	GCCACCACCCTGAGACACAAGGGCATTTCTTTGTCTATCTCCCTTCCTATCACCTGTGTTCTGTTCTCTC	0.5	0.5	0.0715915	0.582268	0.510676	-9.1	0.468049
main_Mafg_chr11:120628129-120628199_5892	Mouse 3' UTR GCLiPP Peak	No	chr11:120628129-120628199	Mafg	117	5094	0.623616	3244.63	TTGTGCAGCCGTAAAGTGCTGGTGCTTCTGGTGACCTTTGACCTGTGGCTGTCCCTGTGTTTTGTGTGTG	0.528571	0.471429	1.70208	1.70208	0	-14	0.697713
main_Gnpnat1_chr14:45378049-45378119_7930	Mouse 3' UTR GCLiPP Peak	No	chr14:45378049-45378119	Gnpnat1	8	347	1.70752	605.179	TTCTAAAGTTTGTCTTCATTTCTTGGTAGTCAAGTGTATGGGTAGTAAACATGTCTGCTCTATGCTGCTC	0.385714	0.614286	1.07686	1.22463	0.147775	-12.3	0.40149
main_Pten_chr19:32821735-32821805_13244	Mouse 3' UTR GCLiPP Peak	No	chr19:32821735-32821805	Pten	10	398	3.87705	1576.06	CTTAATGGTGTGAAGTCCCATTTTCAATAACTTATTGGTGCTGAAATTGTTCACTAGCTGTGGTCTGACC	0.4	0.6	1.8072	1.80723	2.8169e-05	-10.4	0.596041
main_Ppp4c_chr7:126785978-126786048_23473	Mouse 3' UTR GCLiPP Peak	No	chr7:126785978-126786048	Ppp4c	51	2020	0.784008	1617.56	CTGGAGAGGTGGAGCCTTGGCTCCTGGCTTCCTCTCCTTTCTCCCACTTGATCCATGAAGTTTTCAGTCA	0.528571	0.471429	1.24332	1.34406	0.100732	-20.6	0.586178
main_Rnf187_chr11:58933293-58933363_4030	Mouse 3' UTR GCLiPP Peak	No	chr11:58933293-58933363	Rnf187	34	1201	0.436965	536.016	AGCACGAGGCAGAAGGAACCACCTTCTACAGCTGGCCTGCAGCACCCCTACCTACATCCCTCAGGCCTCT	0.6	0.4	0.133901	0.577845	0.443944	-19.5	0.499832
main_Aen_chr7:78907500-78907570_22941	Mouse 3' UTR GCLiPP Peak	No	chr7:78907500-78907570	Aen	14	728	1.53476	1141.2	GGGGTCGCCTAAGACCATCGGAAGACACAGCTGTGTACGTTATGATTCATAACTAGCAAAATTAGAGTTA	0.428571	0.571429	0.0980563	0.346845	0.248789	-12.9	0.513611
main_Ndufaf4_chr4:24902198-24902268_17174	Mouse 3' UTR GCLiPP Peak	No	chr4:24902198-24902268	Ndufaf4	8	211	2.85223	614.689	ATTCCACTTTCTAGTTTAAGTTGGTTTGTTCTTTGTAGTAGACACTGAAAGCAAGAGTCCTCCTGACTCC	0.4	0.6	0.208817	0.717268	0.508451	-10.8	0.648396
main_Vkorc1l1_chr5:129982353-129982423_20076	Mouse 3' UTR GCLiPP Peak	No	chr5:129982353-129982423	Vkorc1l1	10	406	0.879801	364.837	CTAAGGAAGACTGATGGCCAGCGGATCTCCACCCAACCGTCTCAAACACTTCTTTCATTAAGTTTATTTT	0.428571	0.571429	1.03185	1.35931	0.327465	-10.1	0.537834
main_Ptp4a2_chr4:129849886-129849956_18074	Mouse 3' UTR GCLiPP Peak	No	chr4:129849886-129849956	Ptp4a2	18	1015	1.50192	1557.04	GTGAGAGAGGTTAGACTGACAGAAGGTGTGCAGCCTGATTTACAACCAAACCCTGAACCCTTTTGAAGAA	0.457143	0.542857	1.86996	1.86996	0	-9.9	0.585106
main_Gtf3c4_chr2:28824209-28824279_13903	Mouse 3' UTR GCLiPP Peak	No	chr2:28824209-28824279	Gtf3c4	2	61	3.3719	210.084	TCTAGCAAGTTTTTAAGAACATCTGTGTGGGCACAGGTAGGCTGAACCTAGCAATAAGTTTAACAAATGA	0.385714	0.614286	0.188986	0.505831	0.316845	-10.5	0.750443
main_Xpot_chr10:121589918-121589988_2942	Mouse 3' UTR GCLiPP Peak	No	chr10:121589918-121589988	Xpot	17	753	1.60296	1232.84	AGAAGTTGCCTGCATGCCGGTTTAAATTGTTTATGTAAAAATGCTGTTATAAGACATAGATTTATCCTAG	0.328571	0.671429	0.890859	1.05728	0.166423	-5.2	0.504334
main_Fastk_chr5:24441103-24441173_18953	Mouse 3' UTR GCLiPP Peak	No	chr5:24441103-24441173	Fastk	25	1097	0.498453	558.494	GGGGACCTGAGGGTGGGTGAGGAGGTACACACAGGGCTCAGGATGGATCCCCTATGGGGAGGAGGGCAGA	0.642857	0.357143	0.66107	0.954563	0.293493	-20.6	0.547374
main_Csnk1d_chr11:120963811-120963881_5935	Mouse 3' UTR GCLiPP Peak	No	chr11:120963811-120963881	Csnk1d	96	5457	0.66155	3687.27	GTCTTCAGTCTGTCGTGCACCGATGAGAACTCTCCTTTTTGCTGTGAAGGGCAGACAATGCATGGCTGAT	0.5	0.5	1.78777	1.78777	0	-17.7	0.452933
main_Peli1_chr11:21150213-21150283_3483	Mouse 3' UTR GCLiPP Peak	No	chr11:21150213-21150283	Peli1	16	781	1.41327	1127.36	GGAAACCAAGTCCTGTGTTGTGTTTTGTCATTTCTGTTGAGGCTCTATATTGTAGCTTAATTTTTATTTG	0.342857	0.657143	1.90485	1.90485	0	-7.8	0.549643
main_Gtf2a2_chr9:70022675-70022745_26083	Mouse 3' UTR GCLiPP Peak	No	chr9:70022675-70022745	Gtf2a2	4	98	0.61324	61.3825	AATGACAAATCAAAAGTGGTTGCCTTCATAAGATTATTCTTCAATAAACTCGTTTTAAAACTTGTTGTGA	0.285714	0.714286	1.31525	1.40117	0.0859155	-6.2	0.505593
main_Pdcd7_chr9:65359534-65359604_26001	Mouse 3' UTR GCLiPP Peak	No	chr9:65359534-65359604	Pdcd7	28	1247	2.21419	2820.14	GACATGATCAGTCATATGACATGTTATGGTTTTTGTTTTGCCTTATTCTGGGTTTTGTTATTTAATTTCC	0.314286	0.685714	0.52731	0.846493	0.319183	-11.1	0.551755
main_Arih1_chr9:59391053-59391123_25917	Mouse 3' UTR GCLiPP Peak	No	chr9:59391053-59391123	Arih1	38	1949	2.46811	4913.19	ATGCTTTGTGTATGTGGTGTTTAAAAAGAGTTGACTTCACAGTATCTAGGTCTGAGTGTCATAAGTTCTC	0.371429	0.628571	0.92307	1.01166	0.0885915	-7.3	0.418391
main_Strap_chr6:137751354-137751424_22005	Mouse 3' UTR GCLiPP Peak	No	chr6:137751354-137751424	Strap	8	231	1.81381	427.948	GAAAAACACTTAGGAAGAGCAAGTAAACAAGTTGAAATCTCAGTTCTGAAAATATTCTGAAAAACTGCTG	0.328571	0.671429	-0.0797606	0.666718	0.746479	-4.1	0.478059
main_Vamp2_chr11:69091174-69091244_4183	Mouse 3' UTR GCLiPP Peak	No	chr11:69091174-69091244	Vamp2	30	1151	2.02455	2380.08	TCCTAAGAATCCCAAGATTTTCTGGGAGCTTCCAACATGTTGATTAGCATATCATTTGCATACGCTGTCT	0.4	0.6	1.18694	1.25458	0.0676338	-11.3	0.683163
main_Nxf1_chr19:8765322-8765392_12952	Mouse 3' UTR GCLiPP Peak	No	chr19:8765322-8765392	Nxf1	42	1675	2.33719	3998.51	CCTCCCCTTTTCTGTTCTGATGTGGAGGTGTCTTATATATGCCCTACCTGTGTGTTTGTCTTCAGCAAAA	0.442857	0.557143	0.152831	0.719	0.566169	-8.8	0.662892
main_Eif1_chr11:100321339-100321409_5168	Mouse 3' UTR GCLiPP Peak	No	chr11:100321339-100321409	Eif1	20	1090	1.20987	1346.96	GCTGAAGGTTCATGGGTTTTAAGTGCTTGTGGCTCTCTGAAGCTTAAGTGAGGATTTCCTTGCAATGAGT	0.442857	0.557143	2.22383	2.22383	0	-16.9	0.422501
main_Rpl22_chr4:152332376-152332446_18739	Mouse 3' UTR GCLiPP Peak	No	chr4:152332376-152332446	Rpl22	36	2203	1.5488	3484.97	TACTTCCAGATTAACCAGGATGAAGAGGAGGAGGAAGACGAGGATTAGGACACATTGGTCTGCAATGTTT	0.442857	0.557143	1.52173	1.69261	0.170873	-8.8	0.463862
main_Tmed10_chr12:85342918-85342988_6393	Mouse 3' UTR GCLiPP Peak	No	chr12:85342918-85342988	Tmed10	34	1168	1.72695	2060.2	TTTGGTTTCCTTGTGAAAACACCTTGAACTTCTCTTGGTCCTTAGATGAAATGTTTACATAGCTTCTGGT	0.371429	0.628571	0.950479	1.04656	0.0960845	-7.4	0.484815
main_Tbl1xr1_chr3:22211811-22211881_15926	Mouse 3' UTR GCLiPP Peak	No	chr3:22211811-22211881	Tbl1xr1	12	445	1.39235	632.845	GCACTTAAGCATTGTAGATCTAAGCTGCTGTTTTGTTTCCACTATAATCACTACTATATCATGTTTTTTA	0.314286	0.685714	1.16763	1.3129	0.145268	-5.4	0.761348
main_Hyou1_chr9:44391213-44391283_25596	Mouse 3' UTR GCLiPP Peak	No	chr9:44391213-44391283	Hyou1	12	436	0.654246	291.351	ACCGGCTCTAGTTCTGTCCCCAGCCCCACCCTCTGGTCTCCTACTCTCTGGCCCTGTGTTTGGGAAAAAT	0.571429	0.428571	0.299958	0.836972	0.537014	-11.8	0.610484
main_Elovl6_chr3:129633482-129633552_16880	Mouse 3' UTR GCLiPP Peak	No	chr3:129633482-129633552	Elovl6	16	657	1.71092	1148.11	CTGAGTAGTGTCAGGGCTGAGGAGGAAGTCATAGCTCAGGGTCATCACGAAAAATAATCGACAAAAGAAA	0.442857	0.557143	1.60923	1.7679	0.158676	-11.5	0.632807
main_Hnrnpab_chr11:51600147-51600217_3742	Mouse 3' UTR GCLiPP Peak	No	chr11:51600147-51600217	Hnrnpab	37	1815	1.64998	3058.75	AGGGATCCTTGGTAGCTTGTTTTTTGTCTGTTGGGATCTGAGCTTTGTATAACAACCACTTTGGTGTATA	0.4	0.6	-0.000901408	0.56569	0.566592	-11.3	0.398155
main_Eef1e1_chr13:38646031-38646101_7072	Mouse 3' UTR GCLiPP Peak	No	chr13:38646031-38646101	Eef1e1	2	67	1.35178	92.506	TTAATATGGCATCATTGTTTCTTTGTTAATGTTGGTAGAATTTTTAAAGTGTAAGCTCAAGTCTAAATGT	0.271429	0.728571	0.321254	0.668183	0.34693	-3.8	0.466938
main_Rac1_chr5:143506282-143506352_20408	Mouse 3' UTR GCLiPP Peak	No	chr5:143506282-143506352	Rac1	25	1183	0.92014	1111.8	TTCTGTTCCTAGTTGTGGGTGTGCTGGGTGGAGTGTGAAACACGACATGATCAAAGGAGACAGACAGTAT	0.471429	0.528571	0.48607	0.740634	0.254563	-17.2	0.534504
main_Sfxn1_chr13:54106701-54106771_7210	Mouse 3' UTR GCLiPP Peak	No	chr13:54106701-54106771	Sfxn1	28	1011	1.718	1774.04	AGATCTTCGTTAAGAGTCAAGCTGCCGGTCAGGAGTCTGACATTTGAATCGTGTTGTGATTTACAAAAAA	0.4	0.6	0.161366	0.599085	0.437718	-12.3	0.458126
main_Copz1_chr15:103298908-103298978_9824	Mouse 3' UTR GCLiPP Peak	No	chr15:103298908-103298978	Copz1	65	3140	1.0373	3326.76	CAGCAGATTTGAGTGAGTCAGGGGAAACACCCTCTTCCTACTTACACTTGTCTCGCCCACCCCCCATTCT	0.528571	0.471429	0.142662	0.420465	0.277803	-15.2	0.48736
main_Cebpz_chr17:78919774-78919844_11790	Mouse 3' UTR GCLiPP Peak	No	chr17:78919774-78919844	Cebpz	9	205	4.41389	924.195	CCCTTAGTTTTTGCTAGTCAACCATTTTTCCTCATCTTTCTCTCTAACTCCATACATTCCAGACTGTTCA	0.385714	0.614286	1.25496	1.44983	0.194873	-2.1	0.317966
main_Slc16a3_chr11:120958120-120958190_5917	Mouse 3' UTR GCLiPP Peak	No	chr11:120958120-120958190	Slc16a3	3	107	0.57748	63.1116	ACCAGCGTGTGAGCAGCCTGGCCGGGCGGGCAGGGAGCAGGGAAGAGGTCCAGAGACTGGCAACGCTCAT	0.671429	0.328571	0.453549	1.0882	0.634648	-21.5	0.521571
cd8_Zdhhc18_chr4:133608355-133608425_8856	Mouse 3' UTR GCLiPP Peak	No	chr4:133608355-133608425	Zdhhc18	32	1047	0.586124	626.793	GAGGCCACTAAGGAGACCATGCCAAGTCACTGCCTGTGGGAGGGAGACCCAGCCTGAGTGAGGGCATGAA	0.6	0.4	0.447563	0.645113	0.197549	-21.6	0.585572
main_Lsm6_chr8:78807183-78807253_24415	Mouse 3' UTR GCLiPP Peak	No	chr8:78807183-78807253	Lsm6	24	1613	1.13296	1866.55	GCTGGAGGAAGTGGAGGCAGATGGACAGCTAAGGAGGGAGGGTGTGCTTTCTGGAGAGGTGTATATATGG	0.542857	0.457143	-0.00961972	0.564352	0.573972	-12.9	0.695891
main_Cbfb_chr8:105216289-105216359_24700	Mouse 3' UTR GCLiPP Peak	No	chr8:105216289-105216359	Cbfb	2	81	0.167199	13.8327	AATTAAAATTTGTATCAGGGTTGCTTAACATTCTTTTATACTTTCAGACGAGTTGGTTATACAGCTTTCC	0.314286	0.685714	0.70769	0.880225	0.172535	-8.7	0.502507
cd8_Rad23b_chr4:55390043-55390113_8421	Mouse 3' UTR GCLiPP Peak	No	chr4:55390043-55390113	Rad23b	48	2460	1.55629	3910.32	CTTGTTCACTGGATTGTCTGGGGTGACTTGGGCTCATATCCACAATATTTGGTATACGGTAGTAGGTTGG	0.457143	0.542857	1.64599	1.65075	0.00476056	-11.2	0.490731
main_Actg1_chr11:120345816-120345886_5807	Mouse 3' UTR GCLiPP Peak	No	chr11:120345816-120345886	Actg1	172	5813	1.13534	6740.83	CCATCGGTTGTTAGTTGCCTTGAGTTGGGAACGTTTGCATCGACACCTGTAAATGTATTCATTCTTTAAT	0.4	0.6	1.11135	1.27208	0.160732	-13.8	0.449152
main_Rest_chr5:77284731-77284801_19353	Mouse 3' UTR GCLiPP Peak	No	chr5:77284731-77284801	Rest	12	602	0.873158	536.881	AATTGACTGGGAGGCCAAAGATTTAAAAAGCAGATTTTCTCAAGACACAGTTGTGTGATAATGGTGTGTG	0.385714	0.614286	1.11739	1.23675	0.119352	-8.2	0.463691
main_Larp1_chr11:58061209-58061279_3991	Mouse 3' UTR GCLiPP Peak	No	chr11:58061209-58061279	Larp1	30	1063	0.697539	757.339	GGAGTGGGGGTGGGGCACCAGAGCAAGCCACTTCCCCATCACCATCTTCCCATGGAATCCAAGACCTAAG	0.585714	0.414286	0.773366	0.96007	0.186704	-19	0.545343
main_Midn_chr10:80156714-80156784_2346	Mouse 3' UTR GCLiPP Peak	No	chr10:80156714-80156784	Midn	22	602	0.410567	252.446	CTGAGCGGCCCAGCTCTGGGGGGCACGAGGTCACCTCCGATGCCACTTACCAGCCTTTCTGATTCTTTTT	0.585714	0.414286	-0.00357746	0.469183	0.472761	-18.4	0.509615
main_Exosc4_chr15:76329694-76329764_8921	Mouse 3' UTR GCLiPP Peak	No	chr15:76329694-76329764	Exosc4	33	1115	0.873772	995.088	TCTGTCTCACTGGGGGACTGAGTGGCAACCACCCCTTTCCAGAATAAAGGCCTGTTCTTCTCCCGAGTAC	0.542857	0.457143	0.452211	1.03939	0.587183	-15.3	0.573107
main_Ddi2_chr4:141682702-141682772_18553	Mouse 3' UTR GCLiPP Peak	No	chr4:141682702-141682772	Ddi2	57	3341	1.28981	4401.38	GTTTGTGTTCATCAAGTTGAGCTAGAGTGGGGCAGAATGTGTAGCTGTGTTTGTTGTGGCCTTTTTAGTG	0.442857	0.557143	1.30165	1.38154	0.0798873	-12.7	0.629167
main_Cpsf6_chr10:117348755-117348825_2892	Mouse 3' UTR GCLiPP Peak	No	chr10:117348755-117348825	Cpsf6	1	63	0.564296	36.3108	TAGGTGACTACATGGGTATTTAATATTTCTATATTCTGCTTTTCTAGCTGTTTTTACCTAGTTAGCTTGT	0.314286	0.685714	2.14585	2.1597	0.0138592	-11	0.516549
main_Cdc42se1_chr3:95236295-95236365_16518	Mouse 3' UTR GCLiPP Peak	No	chr3:95236295-95236365	Cdc42se1	7	186	1.86582	354.462	TGTCTGCTGCCACCACTTAACAAGGTGATTGGAATGAGTTTGCGAGTCGTAATTTATATTAAAAAGATGA	0.371429	0.628571	1.16215	1.20906	0.0469014	-9.3	0.519902
main_Sdhaf1_chr7:30321662-30321732_22609	Mouse 3' UTR GCLiPP Peak	No	chr7:30321662-30321732	Sdhaf1	44	1564	0.710601	1135.14	GGGCCGTGGCACCTCTTGACAGACAGCTCTCTTGACTTCTTAAGAACACACCCACCTCCTCACTCCCCGC	0.585714	0.414286	-0.0355915	0.514268	0.549859	-10.4	0.546314
main_Ipo8_chr6:148771950-148772020_22103	Mouse 3' UTR GCLiPP Peak	No	chr6:148771950-148772020	Ipo8	38	1480	0.701747	1060.79	CGGCAGCCAGCAGCAGGGACTTGTTGGTCACTAGGCTTAGCAGAAAGACTGAAGGTCTTATGAATCATGT	0.5	0.5	0.453606	0.691465	0.237859	-15.4	0.426037
main_Itpa_chr2:130681509-130681579_15016	Mouse 3' UTR GCLiPP Peak	No	chr2:130681509-130681579	Itpa	5	215	1.57084	344.952	TATATGGTTGAAGGTTTGGCAAAGAAACACACAACTTTTGGTTTTAGAATATAGCAAATGTAAATTCTAG	0.3	0.7	0.191859	0.546028	0.354169	-8.4	0.3959
main_Hnrnpc_chr14:52074849-52074919_7985	Mouse 3' UTR GCLiPP Peak	No	chr14:52074849-52074919	Hnrnpc	82	4789	1.70667	8348.02	GCCTAGTTACAGTTCCACTTCCTTTGATGCTCCGTAGTACTTTCGTTAAGTCTCACCCTGTAAGTTTTGC	0.442857	0.557143	1.63672	1.70973	0.0730141	-6.1	0.377421
main_Yars_chr4:129219166-129219236_18006	Mouse 3' UTR GCLiPP Peak	No	chr4:129219166-129219236	Yars	24	1062	1.11504	1209.49	TACTCCATAAAGCATCTCAAGCAAATCCCTAACCGCCACTGTCAAGTTCAAATAAAGTGTCTGAAAAGGC	0.414286	0.585714	0.560085	0.660873	0.100789	-3.4	0.54564
main_Ube2a_chrX:36883175-36883245_26836	Mouse 3' UTR GCLiPP Peak	No	chrX:36883175-36883245	Ube2a	2	72	0.834687	61.3825	AAAAATGTATATTGATGCATTTATCACCTTATTCCTAATTCATTACATTTACTTTATTAAAAACAAAATA	0.185714	0.814286	1.38472	1.43565	0.0509296	-5	0.53037
main_Set_chr2:30070919-30070989_13954	Mouse 3' UTR GCLiPP Peak	No	chr2:30070919-30070989	Set	5	211	1.40806	303.454	AGGACGAAGGCGAGGATGATTAGCACAGAAGACTGATGGATTCCAACCTTCTTTTTTATTTTCTTTTTAT	0.371429	0.628571	1.22196	1.36061	0.138648	-11.4	0.416028
main_Lamtor3_chr3:137928038-137928108_16956	Mouse 3' UTR GCLiPP Peak	No	chr3:137928038-137928108	Lamtor3	26	726	0.312461	231.697	GCACACCTGGGCCTCACTGCAGCAACCCTGGACCAGGCCAGCAACCTTCCGACCACAATAGTACTTGTAG	0.585714	0.414286	0.254732	0.654338	0.399606	-12.2	0.563762
main_Cdv3_chr9:103355936-103356006_26298	Mouse 3' UTR GCLiPP Peak	No	chr9:103355936-103356006	Cdv3	5	122	1.11009	138.327	CTGAAGTTAAATGACCACATATGGCACATCTACATCTTATTAGGGACATGAATTTTCAAAAATAAAGTGG	0.328571	0.671429	1.179	1.37959	0.200592	-4.5	0.510828
main_Nras_chr3:103065175-103065245_16670	Mouse 3' UTR GCLiPP Peak	No	chr3:103065175-103065245	Nras	1	26	1.07433	28.5299	TAAAAATTGGCATGTTGTTACTTTATAGCTGTGATTAATGATTCCTCAGACCTTGCTGAGATATAGTTAT	0.314286	0.685714	0.439958	0.714521	0.274563	-11.6	0.510893
main_Hnrnpab_chr11:51601310-51601380_3753	Mouse 3' UTR GCLiPP Peak	No	chr11:51601310-51601380	Hnrnpab	7	357	0.701813	255.904	CCGCACACGCTTTGTTTGGACGCGGAGTGAACACAATTATGTACCAAATTTAACTTGGCAAACTTTTATG	0.414286	0.585714	1.74828	1.76127	0.0129859	-9.4	0.429329
main_Pts_chr9:50522059-50522129_25737	Mouse 3' UTR GCLiPP Peak	No	chr9:50522059-50522129	Pts	31	1192	1.90024	2313.51	CACATGCTTGTGTCTCCATGTTCTGTTCTAGAGTACCCGAGCATTAAAGTAATGTAAGGCCTGTATTTAG	0.414286	0.585714	0.23293	0.697296	0.464366	-11.3	0.654975
main_H2afz_chr3:137866658-137866728_16953	Mouse 3' UTR GCLiPP Peak	No	chr3:137866658-137866728	H2afz	1	46	3.22017	151.295	GAAGCTATTGATTCTGAAGTAGTGGGTTTTGATTGAGTTGACTGTTTTTAAAAAACTGTTTGGATTTTAA	0.3	0.7	2.24175	2.24175	0	-6.8	0.416773
main_Ss18_chr18:14626593-14626663_11966	Mouse 3' UTR GCLiPP Peak	No	chr18:14626593-14626663	Ss18	7	224	1.06939	244.665	AGGGCGCTGTGATACAGTTTTTTGAGTACAAAGACATTTTTTAAAAAGCCTTCCAGTTTTGTGCATTAAA	0.342857	0.657143	1.48585	1.55754	0.0716901	-10.8	0.498759
main_Glcci1_chr6:8596678-8596748_20570	Mouse 3' UTR GCLiPP Peak	No	chr6:8596678-8596748	Glcci1	26	1611	1.40811	2316.97	TGTTTTGTACACGTTGATTCTCCTTGCTATCATGACCCACAATTGGTGACTCGATGAAAGACAACCTCTC	0.428571	0.571429	0.151268	0.358648	0.20738	-9.4	0.769515
main_Trmt112_chr19:6910919-6910989_12865	Mouse 3' UTR GCLiPP Peak	No	chr19:6910919-6910989	Trmt112	13	427	0.495576	216.136	AATAGACGTGTCATGTGTGACCCCCAAACTCCCCCCAGTGACTCACCGACCACCGTGTACTTGAGCTCCA	0.557143	0.442857	0.183042	0.809465	0.626423	-7.3	0.41736
main_Nras_chr3:103067798-103067868_16690	Mouse 3' UTR GCLiPP Peak	No	chr3:103067798-103067868	Nras	3	82	2.22966	186.741	AGTTGACTGTTTGATTGTAAATTAATCCTTTCTAATTTTTAAAGACTTGCTTGACTGTTTTCCTTGTTAA	0.271429	0.728571	1.34742	1.43165	0.0842254	-4.4	0.41012
main_Dynll1_chr5:115298649-115298719_19695	Mouse 3' UTR GCLiPP Peak	No	chr5:115298649-115298719	Dynll1	8	344	2.45567	862.813	ATTCTTCTGTTCAAATCTGGTTAAAAGCATGGACTGTGCCAAACACCCAGTGATCCATCCAAAAACAAGG	0.414286	0.585714	1.83558	1.85538	0.0198028	-7	0.430569
main_Lamtor5_chr3:107283698-107283768_16791	Mouse 3' UTR GCLiPP Peak	No	chr3:107283698-107283768	Lamtor5	54	2433	0.80052	1989.31	CTGATGTCAGCTCTCCAGTGGCCTCTCACCGGGATTCAGTCATGCCTGTCTCAGCTCATTTGTAAAACTA	0.5	0.5	-0.236563	0.575915	0.812479	-9.7	0.509326
main_Cdk1_chr10:69338404-69338474_2124	Mouse 3' UTR GCLiPP Peak	No	chr10:69338404-69338474	Cdk1	80	4036	1.4689	6055.25	TGCTGGTCGTAGGGGAAGATCGTGTTGTTTACCGTTGGCTCTCTTCCTGTCTTGTATAGTTTTCTTTGTT	0.442857	0.557143	0.658296	1.01993	0.361634	-12.3	0.464313
main_Nxf1_chr19:8766030-8766100_12959	Mouse 3' UTR GCLiPP Peak	No	chr19:8766030-8766100	Nxf1	11	320	1.68495	550.713	CGCCCAGCTTAGACCGGGACCCAGAGAGCAGACAGAGACCTGGCCAACAGCAACTGCAAATCATTATAGG	0.557143	0.442857	0.720211	0.985479	0.265268	-8.7	0.769808
main_Ptges3_chr10:128076716-128076786_3061	Mouse 3' UTR GCLiPP Peak	No	chr10:128076716-128076786	Ptges3	30	1313	1.48273	1988.45	TTGGTATTGTTTGGCCCTTAAGCTTTTACATCTCTTAGCATGGAGGACAAAGAAAGCTGTACATTGTTGC	0.4	0.6	1.83318	1.88837	0.0551831	-11.7	0.388726
main_Hif1a_chr12:73945733-73945803_6239	Mouse 3' UTR GCLiPP Peak	No	chr12:73945733-73945803	Hif1a	19	492	1.19913	602.586	TAATGTTTTTGTTCAGTTGTTGTTGTTTGTTGGGTTTTTGTTTCTGTTGGTTATTTTTGGACACTGGTGG	0.342857	0.657143	0.409831	0.978789	0.568958	-3	0.467671
main_Pml_chr9:58219974-58220044_25894	Mouse 3' UTR GCLiPP Peak	No	chr9:58219974-58220044	Pml	45	2300	1.02898	2417.26	TCTTGGCCCTCCACAATGTGAGCTTTGTAGAGTTACTGAATGCATATCGCACCAACAGGCAAGAAGGCTT	0.471429	0.528571	0.496296	1.38004	0.883746	-11.7	0.517865
main_E130309D02Rik_chr5:143301233-143301303_20394	Mouse 3' UTR GCLiPP Peak	No	chr5:143301233-143301303	E130309D02Rik	10	384	1.49009	584.43	TCACCTTGGAGAGGATCTGTGTCTTATGGGGGGTGGGGAGGCGGGTATCTAAATTTTCCTTTCATGTGTT	0.485714	0.514286	0.752169	0.898648	0.146479	-17.1	0.62614
main_Vps29_chr5:122362910-122362980_19883	Mouse 3' UTR GCLiPP Peak	No	chr5:122362910-122362980	Vps29	9	291	1.60272	476.363	AAAAAGTCGTAAAGCCAGGCTGGTCTCCACCACTTATTTTGTCCTCATTTCATTGTTTAAATCAAATAAT	0.342857	0.657143	1.1482	1.28851	0.14031	-6.2	0.410451
main_Tox4_chr14:52293270-52293340_8005	Mouse 3' UTR GCLiPP Peak	No	chr14:52293270-52293340	Tox4	22	1191	1.33185	1620.15	TCTCCAAGCCTTGAAGATTCATCTGCTGAACACGAGTCCAAAAGCCTGTTTTTTTGTTTTGTTTTGTTGG	0.4	0.6	0.78507	0.856817	0.0717465	-6.1	0.530861
main_Vamp2_chr11:69090883-69090953_4182	Mouse 3' UTR GCLiPP Peak	No	chr11:69090883-69090953	Vamp2	125	6984	0.809478	5774.28	GTTGTCCTTAACACCCCTTCCTGAGGTTCCCATCACCTCTCTCTCACCCTCTGTCCCTTTTCCTCTTTCC	0.528571	0.471429	0.779662	0.915831	0.136169	-6.5	0.628102
main_Spred1_chr2:117181092-117181162_14797	Mouse 3' UTR GCLiPP Peak	No	chr2:117181092-117181162	Spred1	7	260	2.85186	757.339	AGAGAGTGTGTATGTTTCTGAGTAGATGTTGATGAGGCAGGACTTAAAATTTAAAGAGAAAAACTTGAAA	0.328571	0.671429	0.71238	1.02432	0.311944	-6.5	0.51649
main_Fbxo28_chr1:182316609-182316679_1637	Mouse 3' UTR GCLiPP Peak	No	chr1:182316609-182316679	Fbxo28	108	6088	1.28023	7960.7	CATGCCCATTCTATCGTGTTTGGGGGCTAACCTTGCTCCTGTGCAGGCGATGTGTTAAGGTTATTTGTTT	0.471429	0.528571	1.2927	1.33262	0.0399155	-17.6	0.539457
main_Hmgb2_chr8:57514292-57514362_24152	Mouse 3' UTR GCLiPP Peak	No	chr8:57514292-57514362	Hmgb2	2	45	2.97196	136.598	CTTTTTCAGGGGCTACAACTACAGTTAGATTTAAAGCTTTTGATGTTGAATGTTTCTAAATATTTAATGG	0.3	0.7	1.86366	1.89079	0.0271268	-12.4	0.467152
main_Rab1b_chr19:5100050-5100120_12717	Mouse 3' UTR GCLiPP Peak	No	chr19:5100050-5100120	Rab1b	39	1730	0.744185	1314.97	GCACCTTTCTTTGGAATGAGGGCTCCGCTGTCTGTCACTCACCCCCATGTATGCTGCACTGGGTTTCTCT	0.542857	0.457143	0.63531	0.724944	0.0896338	-13.2	0.540234
cd8_Srsf2_chr11:116850740-116850810_2768	Mouse 3' UTR GCLiPP Peak	No	chr11:116850740-116850810	Srsf2	16	709	1.85525	1343.5	CTCAGGTGGCAAACTTCATTTTATGTGCCATTTTGTTGCTGTTATTCAAATTTCTTGTAATTTAGTGAGG	0.342857	0.657143	2.24079	2.24079	0	-9.7	0.499247
main_Caprin1_chr2:103766610-103766680_14732	Mouse 3' UTR GCLiPP Peak	No	chr2:103766610-103766680	Caprin1	29	1263	2.53062	3264.51	CTGTTTTCATCCCATAAAGACAGGACTGCAATTGTCAGCTTTACATTACCTGGATATGGAAGGAAACTAT	0.385714	0.614286	2.28958	2.294	0.00442254	-12.1	0.452661
main_Grk6_chr13:55460007-55460077_7280	Mouse 3' UTR GCLiPP Peak	No	chr13:55460007-55460077	Grk6	36	1035	0.550393	581.837	GACAAGGCCTGGGCCATCTTGGGACAAAGGTGCGTCCCTTCAGCTCTCTGTGGAGCTCGGGGCTTTATGT	0.585714	0.414286	0.938296	1.13348	0.195183	-24.7	0.612309
main_Map2k2_chr10:81123774-81123844_2514	Mouse 3' UTR GCLiPP Peak	No	chr10:81123774-81123844	Map2k2	33	1587	0.473091	766.849	TGGCCGCTGCCTCTGGGGACAGTGATGCTGTTTGTTGTGGCAGGGGACCTATGCCCATGCATTTGAAAAC	0.557143	0.442857	-0.00183099	0.518028	0.519859	-26.8	0.53011
main_Eif4g2_chr7:111072601-111072671_23291	Mouse 3' UTR GCLiPP Peak	No	chr7:111072601-111072671	Eif4g2	23	1292	2.19407	2895.35	ATTGTGCAAAACATACTGTTGCTATGATGTAACTGCATTTGACCTAACCACTGCGAAAATTCATTCCGCT	0.385714	0.614286	2.6541	2.6541	0	-8.9	0.338991
main_Wdr26_chr1:181177433-181177503_1608	Mouse 3' UTR GCLiPP Peak	No	chr1:181177433-181177503	Wdr26	55	2950	1.77151	5337.68	CTCCTGCCTTTTGTCTGGTGGGACACCATTCTTGTTGCTCTTCTGTGTAATGAAGTTCAAATGCTTGTTT	0.428571	0.571429	2.45337	2.47156	0.0181972	-15.1	0.559
main_Pin1_chr9:20663459-20663529_25305	Mouse 3' UTR GCLiPP Peak	No	chr9:20663459-20663529	Pin1	7	194	0.19634	38.9044	TTCAGAAGGGCAGTGGGGATGGGGAGGCCCCCAGGCTCAGGGGGTCAGAGGTGACCTGATCCCCCAGGTC	0.671429	0.328571	0.349127	0.692676	0.343549	-30.4	0.697135
main_Ube2v1_chr2:167608948-167609018_15653	Mouse 3' UTR GCLiPP Peak	No	chr2:167608948-167609018	Ube2v1	53	3872	1.32213	5228.75	ACCTCAAAGTACCGGAGAGGAAGCTCCACTCAGCCTTCATCCTGAGACACTGTTCTGATACTAACTTCTC	0.485714	0.514286	1.51873	1.51873	0	-11.8	0.599559
main_Cbfb_chr8:105216082-105216152_24699	Mouse 3' UTR GCLiPP Peak	No	chr8:105216082-105216152	Cbfb	21	1180	1.57022	1892.48	ATGGCCTGAGGCAGTGAAGACGTCACCCACTGCCATGGTTTTGCACTATAATGCCTGCATTTCTAATTTT	0.457143	0.542857	1.51804	1.51892	0.000873239	-15.7	0.602855
main_Prpf38b_chr3:108903876-108903946_16831	Mouse 3' UTR GCLiPP Peak	No	chr3:108903876-108903946	Prpf38b	9	482	1.5243	750.422	ACACAAAAGCAAAGATGAGACTGTGTGAAGATTGTGTAAACTTGGATCACATTGAATCCTATAAATGTTG	0.342857	0.657143	1.69673	1.76394	0.0672113	-8.7	0.365388
main_Eif4b_chr15:102095389-102095459_9728	Mouse 3' UTR GCLiPP Peak	No	chr15:102095389-102095459	Eif4b	16	497	1.45105	736.59	TCAAACCTCTATCCAGACAAGACAAAATAAACTCACCATCTCCTGAAGACCTTTCTAAACTTTTTTTTTA	0.328571	0.671429	1.8638	1.92121	0.0574085	-0.5	0.553751
main_Hmgb1_chr5:149048602-149048672_20542	Mouse 3' UTR GCLiPP Peak	No	chr5:149048602-149048672	Hmgb1	1	19	1.69289	32.8526	CTCCTTTTAAAGAAAAAAATTGAAATGTAAGGCTGTGTAAGATTTGTTTTTAAACTGTACAGTGTCTTTT	0.271429	0.728571	2.4522	2.4522	0	-7.7	0.357253
main_H2afz_chr3:137866486-137866556_16951	Mouse 3' UTR GCLiPP Peak	No	chr3:137866486-137866556	H2afz	26	993	2.34669	2380.08	TCCTAACAGCTGTCCAGTGTTGGTGATTCCAGTGGACTGTATCTCTGTGAAAAACACAATTTTGCCTTTT	0.414286	0.585714	2.15968	2.15968	0	-12.6	0.415307
main_Pdap1_chr5:145130026-145130096_20452	Mouse 3' UTR GCLiPP Peak	No	chr5:145130026-145130096	Pdap1	5	144	0.652467	95.9642	AGCATTTCATACGTAACCATTTGAATGTTTCTGCTGTTTTTAGAATTTGGAACCCTGGTTTGGGAGGGGG	0.414286	0.585714	0.972873	1.13479	0.161915	-10.2	0.485504
main_Wipf2_chr11:98899701-98899771_5137	Mouse 3' UTR GCLiPP Peak	No	chr11:98899701-98899771	Wipf2	32	1280	0.359738	470.311	GCTCCTCAGGAAAAGGATGGACCTCCTCTTCTCAGATGGCCTCCCAACCCTAATCCCTGCATGAGAGCTC	0.557143	0.442857	1.56652	1.59962	0.0330986	-16.5	0.716699
main_Myef2_chr2:125088407-125088477_14929	Mouse 3' UTR GCLiPP Peak	No	chr2:125088407-125088477	Myef2	2	70	1.5236	108.932	GAAAGGGCTCAGACAAATTAGGATGGATTTTGGTTTGGTTTAAATTACTTTTCTCTGCTTATAAAGAATA	0.314286	0.685714	0.961789	1.05618	0.0943944	-9.9	0.436708
th2_Arl2bp_chr8:94674181-94674251_13000	Mouse 3' UTR GCLiPP Peak	No	chr8:94674181-94674251	Arl2bp	10	447	0.897571	409.793	TTTGGTGGACTGCCACCAAACAGAAAGCATGTGTATCACATCTCTAGAAAGAAGACGAAAACAGTTCAAA	0.4	0.6	NA	NA	NA	-13.5	0.568358
main_Cnn3_chr3:121457478-121457548_16857	Mouse 3' UTR GCLiPP Peak	No	chr3:121457478-121457548	Cnn3	14	427	1.8931	825.638	AAGCTAGCCTTGAATAATTCTTCTCTCGTCTTCCTGAAACACTATTATGCTTGTTGTACCTTTAAAGTAT	0.342857	0.657143	1.63949	1.65986	0.0203662	-3.2	0.474609
main_Pgrmc2_chr3:41067524-41067594_16043	Mouse 3' UTR GCLiPP Peak	No	chr3:41067524-41067594	Pgrmc2	49	2845	0.991335	2880.65	TGTGAGTGAGTCTGGATGTCTGTGAGAGCACCTTGGGGGAAACTTCCTGCGATGCTGTAAATACGAGTAC	0.5	0.5	1.23068	1.33656	0.105887	-12.2	0.438815
main_Bri3_chr5:144264116-144264186_20428	Mouse 3' UTR GCLiPP Peak	No	chr5:144264116-144264186	Bri3	30	1567	1.56703	2508.04	CAACTGTGGAGCGGTCTTTACTTAGAGGGAACAGCACACCCAGTTTTCCTACATTCAGCTATGTTTTCTA	0.442857	0.557143	0.861099	1.24735	0.386254	-10.8	0.672015
main_Syncrip_chr9:88453959-88454029_26212	Mouse 3' UTR GCLiPP Peak	No	chr9:88453959-88454029	Syncrip	2	72	0.587808	43.2271	TACTCTATTTTCCAAATGTGTTCCAAAAAAATCCTTCATAACTTCTAGCATGGTATCTTAATAAAGAATA	0.271429	0.728571	2.49558	2.49617	0.000591549	-0.8	0.373908
main_Tardbp_chr4:148616033-148616103_18607	Mouse 3' UTR GCLiPP Peak	No	chr4:148616033-148616103	Tardbp	16	516	1.74866	921.602	CCGGAGGCGCTCCTTTTCTAACTGGAAGAATGGGACAGTTTTTGTGTTGGTAGTTTTTCCTAATGCCCTT	0.457143	0.542857	0.910803	1.08207	0.171268	-14.7	0.531479
main_Cotl1_chr8:119810132-119810202_25057	Mouse 3' UTR GCLiPP Peak	No	chr8:119810132-119810202	Cotl1	10	302	0.773571	238.614	GAGGAGACTGCCGCCTCACGTCACCAGCCCACCAGGGAGGAGAAGCCATGAGAGGCACCAGCGCCACCAG	0.671429	0.328571	0.703521	1.11899	0.415465	-19.1	0.514628
main_Hnrnpdl_chr5:100033996-100034066_19476	Mouse 3' UTR GCLiPP Peak	No	chr5:100033996-100034066	Hnrnpdl	51	2969	1.22761	3722.72	TAAGCAGTTTGCTATGCAGGCAGAGGAAGGGAGTTGTGGAAAGTCACATGGTGTATCTTTTGGTGCATTA	0.442857	0.557143	-0.174099	0.63562	0.809718	-17.5	0.432326
main_Strap_chr6:137751144-137751214_22003	Mouse 3' UTR GCLiPP Peak	No	chr6:137751144-137751214	Strap	2	62	0.778182	49.2789	TAACTATTCAAAGTTTTCTATATCATACACAGCCAGCCAGAGCAAAGACAGTTTGGTTATAGAGTCTGAA	0.357143	0.642857	0.232423	0.611014	0.378592	-7.5	0.503488
main_Psmb4_chr3:94884340-94884410_16469	Mouse 3' UTR GCLiPP Peak	No	chr3:94884340-94884410	Psmb4	8	245	2.69134	673.478	AGAGTGTTGAAGCTTTGCTCTTCTAAACGTGACTGTAGCTGGCTCAAAGGCAGACTTTTGTAAAATAAAT	0.385714	0.614286	0.758845	0.880592	0.121746	-10.1	0.557917
rapidmain_Stx16_chr2:174097053-174097123_15767	Mouse 3' UTR GCLiPP Peak	Yes	chr2:174097053-174097123	Stx16	78	3736	0.609457	2325.62	TGGATTATTGGTGATAGGACTTGGCTGGTGCCTCACCGCTGCACTGTGTAAAGAGCACAGCCCACTGGTC	0.542857	0.457143	-0.340042	0.810746	1.15079	-17.5	0.594656
main_9530068E07Rik_chr11:52407957-52408027_3822	Mouse 3' UTR GCLiPP Peak	No	chr11:52407957-52408027	9530068E07Rik	124	6521	1.10994	7392.7	TGTAGTTGCTGCTTCATGGTCACGGTAAACTTGTGTAGGGATTCTGGCAAAAGAGACTGCAGTTCCCAGT	0.471429	0.528571	0.428648	0.908535	0.479887	-12.1	0.500811
main_Mettl23_chr11:116849572-116849642_5704	Mouse 3' UTR GCLiPP Peak	No	chr11:116849572-116849642	Mettl23	17	745	2.10191	1599.4	ATGTTCTGGGACAGTGTCAAAATGGAATAACCTGGCATAAAGCTGAATTATCTGAGGAAACTCAATGGGT	0.4	0.6	-0.10338	0.497155	0.600535	-10.6	0.470984
rapidmain_Nubp1_chr16:10423343-10423413_9925	Mouse 3' UTR GCLiPP Peak	Yes	chr16:10423343-10423413	Nubp1	23	577	0.335937	197.98	GGCCACGTGTCCAGACACCTGGGCAATGGGGGACAGGTGGTACCATAGCCACCAGATGCTGACAGGATTT	0.585714	0.414286	-0.401338	0.832437	1.23377	-23.5	0.634312
main_Ube2d2a_chr18:35806219-35806289_12136	Mouse 3' UTR GCLiPP Peak	No	chr18:35806219-35806289	Ube2d2a	3	70	0.822259	58.7889	ATCTTTGGTTTGTATGTGGTTTCTCAGTTAATACATAGCTAATAGCTCTTATTTTTCTTATGTTTTTAAC	0.271429	0.728571	2.31256	2.31256	0	-5.8	0.341793
main_Cmpk1_chr4:114961413-114961483_17665	Mouse 3' UTR GCLiPP Peak	No	chr4:114961413-114961483	Cmpk1	17	434	3.38967	1502.57	GTATCAGCTAATTCTTGTTTGTGGTAAAGACTACCCCTTTTATCCCTTTTATGTCTGTGCCTTCGGTGAG	0.414286	0.585714	1.2013	1.29868	0.0973803	-7.6	0.530584
main_Atp1a1_chr3:101576381-101576451_16656	Mouse 3' UTR GCLiPP Peak	No	chr3:101576381-101576451	Atp1a1	7	213	0.667617	145.243	GAAAGCACCAAAGCATGTGGGGATGCAGACGTCCTGGAATGAAGCATGTAGCTGTAACGGGGGGCGGGGC	0.585714	0.414286	1.17551	1.37785	0.202338	-17.8	0.622827
main_Rac1_chr5:143506505-143506575_20409	Mouse 3' UTR GCLiPP Peak	No	chr5:143506505-143506575	Rac1	97	5372	0.677375	3716.67	CAGACCGTGTGACACAGCACAGCCTCCTTAATGACACGTTGCCATGTAACGCACCTGTAACTTATCAGCC	0.514286	0.485714	0.116183	0.823958	0.707775	-10.8	0.592296
main_Skp1a_chr11:52246623-52246693_3804	Mouse 3' UTR GCLiPP Peak	No	chr11:52246623-52246693	Skp1a	11	337	0.984587	338.9	CTGTAACTCAACAATTTGTTAGCTTTTCAATTAAAAAAGACACTTACTTCATGTGGTATGTCATCTTTTT	0.285714	0.714286	0.87393	0.991085	0.117155	-7	0.437845
main_Hspa4_chr11:53261564-53261634_3826	Mouse 3' UTR GCLiPP Peak	No	chr11:53261564-53261634	Hspa4	3	46	0.312816	14.6972	TTCCTGAGATGGACATTGATTGATTCCAACACTTGTTTATATTAAAACAGACTATTATAAAGCTTTAAGT	0.285714	0.714286	2.21493	2.22262	0.00769014	-5.5	0.441821
cd8_Myeov2_chr1:92637178-92637248_354	Mouse 3' UTR GCLiPP Peak	No	chr1:92637178-92637248	Myeov2	27	1220	0.902642	1124.77	AGAGGAACTGTCTGAACCAACTGGGTACTGATGTCTCTGGGAATGCCAGCCCGTGTCCTTGTTTAAGTTA	0.485714	0.514286	-0.166507	0.748648	0.915155	-12.1	0.732033
main_Fam49b_chr15:63931511-63931581_8702	Mouse 3' UTR GCLiPP Peak	No	chr15:63931511-63931581	Fam49b	42	2185	1.48951	3324.16	ACACAGTGTTCTTCAGTGACCGAGAATGCACAGTCTTAGTGAATGCCATCAAATCTCCTTATTCTTGCTT	0.414286	0.585714	1.71577	1.78054	0.0647606	-8.8	0.511345
main_G3bp1_chr11:55500153-55500223_3944	Mouse 3' UTR GCLiPP Peak	No	chr11:55500153-55500223	G3bp1	9	264	1.45883	393.367	TTGTTCTTTTGACATGTGATTACCAAACAACTCTAAGCCTCCATTTTTACCATTGGATTTTAAATTGTGA	0.314286	0.685714	0.860775	0.952859	0.0920845	-3.6	0.417048
main_Limd2_chr11:106158326-106158396_5445	Mouse 3' UTR GCLiPP Peak	No	chr11:106158326-106158396	Limd2	26	878	0.219805	197.116	CTCCAGCAAGGAGTCAGCATGCCCTCCTCAGGGTCCCAAGCTCCCTCACTGCCACCTGGGCCTTGTGTAC	0.628571	0.371429	1.2368	1.48266	0.245859	-17.5	0.481336
main_Arf1_chr11:59211488-59211558_4038	Mouse 3' UTR GCLiPP Peak	No	chr11:59211488-59211558	Arf1	7	174	2.41285	428.813	CTCAGAACTGGTTTATTTGGTGTCGTGGAACCTCTTACCGCTTTCAATACACAATTAGTAATCAACTGTT	0.385714	0.614286	1.81097	1.82894	0.0179718	-9.1	0.470915
main_Rbm27_chr18:42338454-42338524_12249	Mouse 3' UTR GCLiPP Peak	No	chr18:42338454-42338524	Rbm27	5	164	1.03225	172.908	TCTCGTTCGTGGCGAAGATGAAATTTGATGCGAGTTGTGTAATTTTTAGAAATATTGTTTAGAAGAACAA	0.328571	0.671429	1.90514	1.95015	0.0450141	-8.2	0.537713
main_Cdk4_chr10:127067048-127067118_2965	Mouse 3' UTR GCLiPP Peak	No	chr10:127067048-127067118	Cdk4	11	465	0.695358	330.255	GTGGAGAAACCCTCGCTGAAGCGGCAGCCTCTGTTTCCCCCCAAGGCTGTGGAGAATCCTCCAGTTTTTT	0.557143	0.442857	0.303268	0.704141	0.400873	-20.8	0.643245
main_Atp5j_chr16:84827915-84827985_10509	Mouse 3' UTR GCLiPP Peak	No	chr16:84827915-84827985	Atp5j	23	1286	1.41381	1857.04	TGAAGTCATCGACAAACCCCAGTCCTGAGGAACATACAAAATCCATGTGGTAATTTGTCATGAATTAGTT	0.385714	0.614286	0.776394	1.1553	0.378901	-9.7	0.44166
main_Mrps2_chr2:28470047-28470117_13899	Mouse 3' UTR GCLiPP Peak	No	chr2:28470047-28470117	Mrps2	54	1699	0.541046	938.893	CTGAGCAGGAAGGTCCTTGTCCAACCCTGGTCTGTGTCCCCACTCCCTGTCCTCAGCATCAGCACCACAG	0.6	0.4	-0.131437	0.569465	0.700901	-13.1	0.511513
main_Stx12_chr4:132854055-132854125_18161	Mouse 3' UTR GCLiPP Peak	No	chr4:132854055-132854125	Stx12	3	107	1.43183	156.482	ATAAGTTTCTCTGCGCTTTTGCACCATCCCACCTACTTAATACCAATAAACATTTAAAAGCTTTTGTAGT	0.342857	0.657143	1.12815	1.24311	0.114958	-4.3	0.659093
main_Suds3_chr5:117092879-117092949_19736	Mouse 3' UTR GCLiPP Peak	No	chr5:117092879-117092949	Suds3	58	1784	0.784289	1429.09	GGCGGTCAGCGGCTTGACTTTCTACGAGCTTCCTCCTCCCTTGACCCCTTCTCTGGAGTGGTTTTTATTT	0.528571	0.471429	1.18639	1.26273	0.076338	-15.9	0.590682
main_Ube2b_chr11:51986557-51986627_3789	Mouse 3' UTR GCLiPP Peak	No	chr11:51986557-51986627	Ube2b	5	201	1.03595	212.677	TAGAAAGGCTAGCAAGTTTTAAGTGCCACGGGTTTTAAGGATTCTGCAGAGAAAAAAAGAAAAAGTCCTT	0.371429	0.628571	2.05034	2.05456	0.00422535	-7.9	0.363052
main_Ago2_chr15:73105007-73105077_8829	Mouse 3' UTR GCLiPP Peak	No	chr15:73105007-73105077	Ago2	17	1167	1.4267	1700.55	TGTATGCATGTGGGTGTCTTACTAATGACAATAGTCTCTTCTTGCTGTGTCTTTAGAAATCTTTTAAAGT	0.342857	0.657143	0.521056	0.767845	0.246789	-10.5	0.76972
main_Ppp2r4_chr2:30446981-30447051_14010	Mouse 3' UTR GCLiPP Peak	No	chr2:30446981-30447051	Ppp2r4	63	2335	0.520554	1241.48	TAGGCCCTGGGGGACCTGTGTCCATCCTCATGCTGGCTTTGTTCCCTGGCCCTTGGCTTTGCTAGGTTTC	0.585714	0.414286	0.132761	0.491183	0.358423	-23	0.610298
rapidmain_Ykt6_chr11:5966697-5966767_3314	Mouse 3' UTR GCLiPP Peak	Yes	chr11:5966697-5966767	Ykt6	84	4216	0.858088	3695.05	CAGACTGAGTGTGGGCTGGAATTGTTCTGGTGTTGGGAGGGTCAGCTGGGAGTGTCCATCTTTAGGGAAG	0.542857	0.457143	-0.379042	0.746113	1.12515	-15.6	0.499939
rapidmain_Samhd1_chr2:157099399-157099469_15396	Mouse 3' UTR GCLiPP Peak	Yes	chr2:157099399-157099469	Samhd1	1	12	1.55181	19.0199	TGAAATGGAATAATAAGACTTCATCTTGCCTCCAAGAAGTATCCAAAGTAAAAACATGTCTAAAATTTTA	0.285714	0.714286	-0.259901	1.11675	1.37665	-4.3	0.55364
main_Rbpj_chr5:53656077-53656147_19244	Mouse 3' UTR GCLiPP Peak	No	chr5:53656077-53656147	Rbpj	2	95	1.22066	118.442	TTACCATGTTATTGATAGTTCTTTTGTCAGCTGCTTTTATTAAAAGTCCTCTTTTGTGAATTTGTAAATC	0.285714	0.714286	0.363648	0.826239	0.462592	-7.1	0.42958
rapidmain_Tbl1x_chrX:77660364-77660434_27032	Mouse 3' UTR GCLiPP Peak	Yes	chrX:77660364-77660434	Tbl1x	87	4319	1.07672	4749.79	ATTCCTTCTGTCTTCCCTTGTTGTTGCCCGCCCCTTCCTCTGATGTCCTTGCTCTGGTGTGGTCTCACTT	0.528571	0.471429	-0.505141	0.672577	1.17772	-7.1	0.614788
main_Cyb5b_chr8:107185882-107185952_24799	Mouse 3' UTR GCLiPP Peak	No	chr8:107185882-107185952	Cyb5b	4	110	2.31618	260.227	CAGTCAGGCTACATAGAGAGACCATGTCACAACCACTCCACCAAATAAAAGAACTGTATTCTTAAGTAGA	0.4	0.6	0.232592	0.556789	0.324197	-3.7	0.518638
main_Mrpl33_chr5:31622497-31622567_19062	Mouse 3' UTR GCLiPP Peak	No	chr5:31622497-31622567	Mrpl33	17	505	0.52798	272.331	GTGTGCAATGAAGACGAGGAAGTTCCAGCATGGCCTCGGGGGATGTTGGCTAAGGGACAGAGCCGAAAGA	0.557143	0.442857	1.22238	1.44055	0.218169	-14.4	0.463613
main_Wdr26_chr1:181177760-181177830_1613	Mouse 3' UTR GCLiPP Peak	No	chr1:181177760-181177830	Wdr26	25	1005	1.52107	1561.36	GGAATGCAGTAGCATGGATAGTTGATGGCAAATTTGGAGCAGACGACTTCTGTTTAACTTAAAATTAGTC	0.385714	0.614286	2.17241	2.1757	0.00329577	-9.3	0.51024
main_Pdcd6_chr13:74303670-74303740_7434	Mouse 3' UTR GCLiPP Peak	No	chr13:74303670-74303740	Pdcd6	22	862	2.01497	1774.04	GTTTGCTGACTAATTGTGCCATGAGACCTAATAATGCTTCAGGATTTTGCTCTCAAACTATCATGTTCTT	0.371429	0.628571	0.218803	0.840718	0.621915	-6.3	0.528484
cd8_Zdhhc18_chr4:133608094-133608164_8855	Mouse 3' UTR GCLiPP Peak	No	chr4:133608094-133608164	Zdhhc18	24	922	0.496666	467.717	AGAGCTGGGGTCCAGTAGAGAGAGCAAGCAGGGGTGGGAAGCAGCCTGTGTCAGGGGAAGCCAAACAAGC	0.6	0.4	0.0456479	0.485901	0.440254	-15.2	0.522579
rapidmain_Ago2_chr15:73102027-73102097_8814	Mouse 3' UTR GCLiPP Peak	Yes	chr15:73102027-73102097	Ago2	24	648	0.643976	426.219	TGGTCCATCCATGGGAGACCTAAAGCCTGGTGCAGCCCTTTATGCCATGTGACCTTGCTGGGACCTAAGT	0.542857	0.457143	-0.29693	0.72738	1.02431	-16.4	0.683389
main_Nus1_chr10:52436720-52436790_1935	Mouse 3' UTR GCLiPP Peak	No	chr10:52436720-52436790	Nus1	6	222	1.07521	243.801	TGACACTGATGTTTACAAAGTACCTATAAAACCCTGTACACACCTAGTTCATATTCCTCATAATTTATCA	0.328571	0.671429	1.60563	1.64327	0.0376338	-5.8	0.643208
main_Snx27_chr3:94501103-94501173_16468	Mouse 3' UTR GCLiPP Peak	No	chr3:94501103-94501173	Snx27	2	56	3.9148	223.916	CGTCTCCCATGTCAGACAGTAACCATTAACACAAAAGAAGAAAAAAAGGAAAAAAAAGTCACTATGTCCC	0.371429	0.628571	1.34396	1.3868	0.0428451	-2.8	0.486922
main_Coro1c_chr5:113843982-113844052_19597	Mouse 3' UTR GCLiPP Peak	No	chr5:113843982-113844052	Coro1c	34	1179	0.552809	665.697	CTCACACACCTGATGACCGGGCCAGCGCCACCTCTGCTCTGTCTCTTCCTTTTTAATGTTGCCAAAACCG	0.542857	0.457143	1.47246	1.52948	0.0570141	-8.5	0.660295
main_Pmepa1_chr2:173227687-173227757_15748	Mouse 3' UTR GCLiPP Peak	No	chr2:173227687-173227757	Pmepa1	30	1081	0.779104	860.219	CGCACTTCTTAAGAGAGAAGAGAGAGGAAGTCAGGGGACACACAGGCTGAGTGGCCGTGTGGTAGTTCTC	0.542857	0.457143	0.0456338	0.939211	0.893577	-19.5	0.662106
main_Mcl1_chr3:95662014-95662084_16556	Mouse 3' UTR GCLiPP Peak	No	chr3:95662014-95662084	Mcl1	51	2375	0.52034	1262.23	GTTATGCTCCCAGTTCCCCTATAGAGTCGTCTACACTTCCTCCCTGTGCTCTTCACTGGCCATTTTAGTT	0.485714	0.514286	0.0443803	0.550634	0.506254	-6.6	0.530118
main_Aes_chr10:81565688-81565758_2613	Mouse 3' UTR GCLiPP Peak	No	chr10:81565688-81565758	Aes	6	127	1.11304	144.379	ATTAGCTCTTGGGGAAGGGGGAGGGGGGAGACCAGGGGAGACAGGCACAGAGAGCGCAGTGTTCTAAGGG	0.614286	0.385714	0.250887	0.869507	0.61862	-13	0.456833
main_Fundc2_chrX:75394427-75394497_27020	Mouse 3' UTR GCLiPP Peak	No	chrX:75394427-75394497	Fundc2	129	6829	1.0843	7563.01	CTTGCCAGCAGCTTCTACACTCCAACATAGGACAATCGGCACTCCTCTTCCTCATCTTCTCCTGTGCCTT	0.514286	0.485714	0.377887	0.797634	0.419746	-9.2	0.503219
main_Snrpe_chr1:133603945-133604015_976	Mouse 3' UTR GCLiPP Peak	No	chr1:133603945-133604015	Snrpe	45	2296	0.809946	1899.4	AATGGTGAAGTCTGTAGGATGTTGAGAAGACCCCTTGAGCGTGTTTAAAGATGTCTGCTGCAACCTGCAT	0.457143	0.542857	-0.192014	0.567958	0.759972	-15.3	0.374925
main_Mrfap1_chr5:36795283-36795353_19166	Mouse 3' UTR GCLiPP Peak	No	chr5:36795283-36795353	Mrfap1	1	17	0.199163	3.45817	TATTGTTTCTATTGGGGGACTTTAATTTCTGTGTGAGACCAAAGGAGGAGAGATGTATTTTGTGCAAAAT	0.357143	0.642857	1.0269	1.1311	0.104197	-7.9	0.4756
main_Rbms1_chr2:60751430-60751500_14322	Mouse 3' UTR GCLiPP Peak	No	chr2:60751430-60751500	Rbms1	16	639	1.14051	744.371	TCTTTTTTGCCGGACCAGTTTGCGGTTAGGAGAATGTGCCTTTTTTGTACCTTCGCATTAGGTTTTATAA	0.4	0.6	2.29813	2.29813	0	-12.6	0.515312
main_Ppp6r3_chr19:3456303-3456373_12599	Mouse 3' UTR GCLiPP Peak	No	chr19:3456303-3456373	Ppp6r3	2	59	4.2896	258.498	TAAGTATTTATTGCTACAACTTAGTTGATGAATTGCTGTTCTTGTAAAGCCATATGTTCTGTTAAGGTCT	0.314286	0.685714	1.40551	1.57503	0.169521	-7.2	0.365688
main_Adss_chr1:177763232-177763302_1533	Mouse 3' UTR GCLiPP Peak	No	chr1:177763232-177763302	Adss	22	946	2.24137	2165.68	GCCCTTGGCTTTACATTGTGCTGAGATTAGCCTTCCCTGGACCATTAAATGTTTAAATTAGGCATCACCT	0.428571	0.571429	1.15056	1.25994	0.10938	-13.2	0.414034
main_Pafah1b2_chr9:45968391-45968461_25718	Mouse 3' UTR GCLiPP Peak	No	chr9:45968391-45968461	Pafah1b2	7	188	1.99905	383.857	TATGACACATTTGTAGAATTATCACTTTTCCCTAGGACAACATCAAGCAAGAGTACAATATGAAGATTCT	0.328571	0.671429	0.938141	1.02476	0.0866197	-4	0.505385
main_Suz12_chr11:80032544-80032614_4623	Mouse 3' UTR GCLiPP Peak	No	chr11:80032544-80032614	Suz12	2	81	1.17039	96.8287	ATTATGAGACATTTTCTGGGAAAGGGATGTTGGGATGTTATGCTGTCTTAGAGATGGAGAATTTTTGTGA	0.371429	0.628571	1.05118	1.15011	0.0989296	-11.9	0.443873
main_Arpc1a_chr5:145108512-145108582_20439	Mouse 3' UTR GCLiPP Peak	No	chr5:145108512-145108582	Arpc1a	92	4410	0.509593	2295.36	ACACTGAAGCAACTAGCGTGTGTTCCTGTGGATGTCGTGGGTGACGTGTGGCATTTAGAGACGGCAGTGG	0.542857	0.457143	0.509254	0.837648	0.328394	-15.5	0.447085
main_Dusp11_chr6:85945416-85945486_21256	Mouse 3' UTR GCLiPP Peak	No	chr6:85945416-85945486	Dusp11	97	5712	1.25425	7317.48	CTTGTAGATGACTGGTACTTCACTGTCTTCTTGCGGTCTTCTGTGTCTTAACATCTCCTCCACTCGTCCC	0.485714	0.514286	-0.133493	0.554676	0.688169	-10.6	0.701796
main_Papola_chr12:105838297-105838367_6564	Mouse 3' UTR GCLiPP Peak	No	chr12:105838297-105838367	Papola	22	772	2.30798	1819.86	AGCAGATCTTTGTATGAGCATGGTTTTTGAATCCTTCATTTCGCTGCATTCTATCACACGTTTGTGCATT	0.385714	0.614286	0.71669	0.836606	0.119915	-9.4	0.414826
main_Hsp90ab1_chr17:45567821-45567891_11405	Mouse 3' UTR GCLiPP Peak	No	chr17:45567821-45567891	Hsp90ab1	10	360	1.22734	451.291	GGAAGATCCCCTCCCACAGAATAGCAGGGTTGGGTGTTATGTATTGTGGTTTTTTTGTTTGTTTTATTTT	0.385714	0.614286	0.749155	1.03068	0.281521	-11.4	0.423689
main_Uba2_chr7:34141149-34141219_22659	Mouse 3' UTR GCLiPP Peak	No	chr7:34141149-34141219	Uba2	81	4980	1.28309	6526.43	CGTTCAGCGTTCATTTGCTGAGACTGTTCGAGACTGTTGCTGTGTTGAAGTAGGAATAGAATTTGCAACC	0.442857	0.557143	1.21527	1.33676	0.121493	-15.2	0.458208
main_Szrd1_chr4:141114080-141114150_18528	Mouse 3' UTR GCLiPP Peak	No	chr4:141114080-141114150	Szrd1	20	622	0.457243	290.486	CCACCCCCAGGGTAGGGAGGAACTTGGCTGCTAGCTCAGAGTCTAGGGCCCACCCACAGAGGCTAGTGGT	0.628571	0.371429	0.595845	0.817169	0.221324	-22.9	0.47205
main_Tbl1xr1_chr3:22210613-22210683_15923	Mouse 3' UTR GCLiPP Peak	No	chr3:22210613-22210683	Tbl1xr1	30	1365	0.82598	1151.57	CTTGTGAATTCTGCTCACCAAGTGCTGGGATCTAACCTGCTGTGCCCCTAAGTAGCGTTTAGAAGTTTGG	0.485714	0.514286	2.50806	2.50806	0	-14.3	0.616149
main_Foxo1_chr3:52347544-52347614_16082	Mouse 3' UTR GCLiPP Peak	No	chr3:52347544-52347614	Foxo1	12	479	2.55347	1249.26	CCAGTGATCAATGTGCTGAATTAATGGACTTGTCAAACTTTGGGGCAGAATAAGATTAAGTGCCAGCTTT	0.4	0.6	0.840366	1.34496	0.504592	-10.7	0.65513
main_Lrrc47_chr4:154020257-154020327_18771	Mouse 3' UTR GCLiPP Peak	No	chr4:154020257-154020327	Lrrc47	72	3717	1.04707	3975.16	GTGTGCTGTAGGTGTCTGTAGGTGTGGGTATGCTGCAGGTGTGGGTGTGCTGTAGATCTCTATAGGTGTG	0.528571	0.471429	0	0	0	-16.3	0.486848
main_Bag1_chr4:40936445-40936515_17243	Mouse 3' UTR GCLiPP Peak	No	chr4:40936445-40936515	Bag1	51	1406	0.435262	625.064	GCCTGTTTCTCCATGGCTGCCAGGGGCAACTAGCCAAATGTCAATTTCCCTGCTCCTCCGTCGGTTCTCA	0.557143	0.442857	0.355254	0.710549	0.355296	-12.9	0.531391
main_Zfp91_chr19:12769312-12769382_13122	Mouse 3' UTR GCLiPP Peak	No	chr19:12769312-12769382	Zfp91	46	1789	0.991224	1811.22	GAAGCAGGCTCCCAAGAGAGGGGACTGACCTCTGTTTCTGGCTGAAAGATAGGGCTCTGTGTCAGTGAGA	0.542857	0.457143	0.92031	1.08203	0.161718	-20	0.62705
main_Prosc_chr8:27053389-27053459_24013	Mouse 3' UTR GCLiPP Peak	No	chr8:27053389-27053459	Prosc	42	1588	0.429618	696.821	AGTACCACTGGTGCAAGGACACTGAGGCCAAGCCGCTCAGGGTCAACCATGCACCAGCCTAGTTCATTTG	0.557143	0.442857	0.0242113	0.913	0.888789	-23.3	0.553848
main_Hif1a_chr12:73945675-73945745_6238	Mouse 3' UTR GCLiPP Peak	No	chr12:73945675-73945745	Hif1a	15	497	1.47659	749.558	ACTCAGAGCTTTGGATCAAGTTAACTGAGCGTTTCCTAATCTCATTCCTTTTGATTGTTAATGTTTTTGT	0.342857	0.657143	1.55704	1.68651	0.129465	-9.4	0.477012
main_Zfp91_chr19:12769607-12769677_13125	Mouse 3' UTR GCLiPP Peak	No	chr19:12769607-12769677	Zfp91	18	735	1.70901	1282.98	TCCTCTACTACTGCCCTATGGCTCTGGCTTCTTCCCACTGCAACAACCAACACTTACCCTCAAATATTAT	0.457143	0.542857	0.938211	1.10103	0.162817	-5.1	0.715955
main_Ssr3_chr3:65380791-65380861_16158	Mouse 3' UTR GCLiPP Peak	No	chr3:65380791-65380861	Ssr3	16	764	1.5688	1224.19	AGTGCAGCACTATGATCACTGATTTCATATTCCTATTTGCCGTTCACCACACCCAAGAACTTTCTGTAAA	0.4	0.6	0.125113	0.520521	0.395408	-5.7	0.456493
main_Ube2v1_chr2:167607844-167607914_15638	Mouse 3' UTR GCLiPP Peak	No	chr2:167607844-167607914	Ube2v1	48	2007	0.991524	2032.54	CTCTGTTCAGGACCACTAAATGTTGAAATGTGGATGCATACCGAAATAAAGGCAATCCGTTGTGTTGCAG	0.428571	0.571429	0.998718	1.06196	0.0632394	-8.9	0.607549
main_Isy1_chr6:87818709-87818779_21295	Mouse 3' UTR GCLiPP Peak	No	chr6:87818709-87818779	Isy1	2	77	0.549639	43.2271	TTTGCCCTATACTCTGCTTTTGGGAATCAAGAAGGATCAAACTAGTAGCCAATTTTCAAAAATACATAAT	0.328571	0.671429	0.0321408	0.555746	0.523606	-5	0.486374
main_Tmem30a_chr9:79771142-79771212_26166	Mouse 3' UTR GCLiPP Peak	No	chr9:79771142-79771212	Tmem30a	6	155	1.97139	312.1	ATGTCTGGTTAGTATGTCATTTTGAAGTTGGCACATAACTTTAAAAAAACAAAACAAACAAAACAGCCTT	0.3	0.7	1.02644	1.18768	0.161239	-12.5	0.615142
main_Kpnb1_chr11:97161643-97161713_4958	Mouse 3' UTR GCLiPP Peak	No	chr11:97161643-97161713	Kpnb1	13	803	1.6718	1371.16	CTCTCCTGACTTGTATTGTGGCAGTCGGAATGCCCCCAGAAAACTGTGCCAAAGAGTTTAGAAAACAAAT	0.442857	0.557143	1.5158	1.6002	0.0843944	-10.8	0.446344
rapidmain_Ubac2_chr14:122020389-122020459_8426	Mouse 3' UTR GCLiPP Peak	Yes	chr14:122020389-122020459	Ubac2	61	2819	0.610436	1757.61	GTCAGGGAAGGGCGGCAGGCCATGTGACCTCAGAAAGGCTGTGTCACACTACTCTGTATGGACTGGGTTT	0.557143	0.442857	-0.289183	0.717972	1.00715	-18.6	0.592388
main_Set_chr2:30071490-30071560_13963	Mouse 3' UTR GCLiPP Peak	No	chr2:30071490-30071560	Set	7	321	2.76083	905.176	CAACATGGCTTCTCCTTTGGCATGTTTAATTGTGTGGTTTAACAGACATCCTTGCAATTTAAGGTGACAC	0.4	0.6	1.83989	1.83989	0	-13.5	0.441344
main_Eif1a_chr18:46608939-46609009_12285	Mouse 3' UTR GCLiPP Peak	No	chr18:46608939-46609009	Eif1a	2	31	0.76453	24.2072	AATATGTTTTACTTTGCAAAGTAGGTTGTGTTAAGTCATTTTCAAAAAGTTACCTACTATATCGAGGCTC	0.314286	0.685714	-0.00332394	0.622817	0.626141	-9.7	0.383058
main_Hmgb1_chr5:149048133-149048203_20538	Mouse 3' UTR GCLiPP Peak	No	chr5:149048133-149048203	Hmgb1	9	385	1.00254	394.231	TGAAAGTTTTCTTCTCAAGGGGAAGCTAGTCTTTTGCTTTGCCCATTTTGGGTCACATGGATTATTAGTG	0.4	0.6	1.18862	1.24992	0.0612958	-13.8	0.455263
main_Srsf6_chr2:162935915-162935985_15463	Mouse 3' UTR GCLiPP Peak	No	chr2:162935915-162935985	Srsf6	15	546	2.3564	1314.1	TTACAACCTTTCCATTATTCAGACATTTGTAAAGTCATTTCATCCCAAATACTTAACCTCATTCTTTAGT	0.3	0.7	-0.0625915	0.46338	0.525972	-2	0.513681
main_Uqcrq_chr11:53428960-53429030_3830	Mouse 3' UTR GCLiPP Peak	No	chr11:53428960-53429030	Uqcrq	9	278	2.46626	700.279	CCTGCCTCTGAAAGACCCTTCTCTGGGAGAGGAATCCACACTGTAGTCTTGAAGACAATAAACTACTTAT	0.442857	0.557143	0.646887	0.786352	0.139465	-13.4	0.652923
main_Calm1_chr12:100206536-100206606_6472	Mouse 3' UTR GCLiPP Peak	No	chr12:100206536-100206606	Calm1	22	692	0.720455	509.215	GTTTGTATCTAGCGAAGCTGAATGTCAGAAGCCCCTCTGTCCACACACAAAGTCTGCATGTATTGGTCGG	0.485714	0.514286	2.29287	2.29386	0.000985915	-8.1	0.395904
main_Pten_chr19:32820802-32820872_13242	Mouse 3' UTR GCLiPP Peak	No	chr19:32820802-32820872	Pten	2	71	2.65855	192.793	ATAAAAAAAGTGGTCATAGATAGATAAAAGACACAGCAGCAATGACTTAACCATACAAATGTGGAGGCTT	0.342857	0.657143	1.60739	1.62624	0.0188451	-6.4	0.512453
rapidmain_Carhsp1_chr16:8660417-8660487_9907	Mouse 3' UTR GCLiPP Peak	Yes	chr16:8660417-8660487	Carhsp1	85	3940	1.1702	4709.16	TTGCCTCTTGGTGCCTTTGCAGCAGGTCTGTCTCCACCTTCACCTTCTGGGAAAGACTCTAATGCTTAGG	0.514286	0.485714	-0.499732	0.841451	1.34118	-19.2	0.567106
main_Setd8_chr5:124461402-124461472_20007	Mouse 3' UTR GCLiPP Peak	No	chr5:124461402-124461472	Setd8	20	732	1.87443	1401.42	AGCACTGTTCTCCTGCTCAAGAAGGGCAGGTCTCCTGAAACTGCATTAATTCTTTATAGAAATGTGAACA	0.414286	0.585714	0.981577	1.27172	0.290141	-15.4	0.600417
main_Ccnd2_chr6:127128976-127129046_21854	Mouse 3' UTR GCLiPP Peak	No	chr6:127128976-127129046	Ccnd2	59	3032	1.13678	3520.42	AAGGTTACTTCTGATGCACAGGCTGAACATCAGGGTGTGGCATTTTGGTCCCTTTTCCGTTTTTTGTTTG	0.442857	0.557143	0.622746	0.762268	0.139521	-13.7	0.704818
main_Tm9sf3_chr19:41214851-41214921_13294	Mouse 3' UTR GCLiPP Peak	No	chr19:41214851-41214921	Tm9sf3	29	1334	1.83946	2506.31	TTCCATTGATCCTAGGTTCTTACTGACTGCTTTCTCCAGCTGTTCACAGCAGATGCTTGGATTTTATGCA	0.428571	0.571429	2.45963	2.45963	0	-13.3	0.429138
main_Mlec_chr5:115146665-115146735_19676	Mouse 3' UTR GCLiPP Peak	No	chr5:115146665-115146735	Mlec	12	375	0.765185	293.08	GCCTAGAGTCACCCCAAAGAACTGAGACTGGCTGCAGCAGCCCAGCTGTGTTTCTCATTGATGATAATAG	0.5	0.5	0.292873	0.614423	0.321549	-15.4	0.601305
main_Fbxw8_chr5:118067846-118067916_19771	Mouse 3' UTR GCLiPP Peak	No	chr5:118067846-118067916	Fbxw8	24	986	0.746862	752.152	CTCCTCCTCCTCAGGCTTTGGTAGGACTGGCTGATGACTCAGAGTTAACCTTTCCAGGGGTGGCTCCTCC	0.571429	0.428571	-0.00502817	0.501197	0.506225	-17.6	0.549898
main_Kxd1_chr8:70513456-70513526_24236	Mouse 3' UTR GCLiPP Peak	No	chr8:70513456-70513526	Kxd1	7	287	1.33897	392.502	TTTCTTGAGGGTCCATCAGGCATCTCCAGGAGCTGGCCAGTTATCTTAGAAAACAACTGAATGGAATATT	0.428571	0.571429	0.22669	0.810775	0.584085	-12.3	0.497882
main_Crebzf_chr7:90446122-90446192_23102	Mouse 3' UTR GCLiPP Peak	No	chr7:90446122-90446192	Crebzf	4	66	0.846443	57.0598	TTATTCATCTCTAACATGATATTGGAAAGTAATGGATGAAAATAGGAAAAATGGTTGTTAATATAGACTT	0.257143	0.742857	1.72624	1.74139	0.0151549	-7	0.471862
main_Higd1a_chr9:121849584-121849654_26652	Mouse 3' UTR GCLiPP Peak	No	chr9:121849584-121849654	Higd1a	45	2229	1.4096	3209.18	AACCCTAAGCCTAAGCCTTAGAAGAGCTGGTGGCATGGGAAGTGCTTGCTTTAGTTAGACGTCTCATATT	0.457143	0.542857	0.774521	0.859423	0.0849014	-15.2	0.512243
main_Dcaf8_chr1:172194791-172194861_1493	Mouse 3' UTR GCLiPP Peak	No	chr1:172194791-172194861	Dcaf8	10	344	1.95371	686.446	AAAGAAAGATACCTGAGGAGGACAGAGCACAGGAGACGGAACCAGCAGAGAGCCCCTAGAAGTGAGAGAT	0.514286	0.485714	0.641859	0.702451	0.0605915	-6.9	0.407201
main_Cmip_chr8:117459374-117459444_25009	Mouse 3' UTR GCLiPP Peak	No	chr8:117459374-117459444	Cmip	7	117	0.752394	89.9124	CCTGGTGAAGCCCCCTCTGTGCACAGGATGGGCTCGCACAAAACAAAACAAAAAAGAAACAAAAACAAAA	0.442857	0.557143	0.357521	0.586085	0.228563	-15.5	0.516848
main_Rabggtb_chr3:153907552-153907622_17061	Mouse 3' UTR GCLiPP Peak	No	chr3:153907552-153907622	Rabggtb	51	2869	1.16419	3411.48	CCAGCCTGAGCTAGTGAGCTAGTCAGATGGGAGAGATGCTGTAGTGTGCAATATGAATTACTGCTGTATT	0.457143	0.542857	0.519465	0.995859	0.476394	-19.2	0.449919
main_Natd1_chr11:60903066-60903136_4096	Mouse 3' UTR GCLiPP Peak	No	chr11:60903066-60903136	Natd1	14	574	1.40386	823.044	ACAACCTCGGGGATCACATTTATGGGTTTTAGCTGTGTCCCATGGCTTCAAGATATTAAAGATGCTTTTC	0.414286	0.585714	0.0898451	0.687282	0.597437	-12.4	0.681522
main_Stk40_chr4:126139483-126139553_17880	Mouse 3' UTR GCLiPP Peak	No	chr4:126139483-126139553	Stk40	14	354	0.449524	162.534	CGTCCCCGGGGGCCTGCCCTCAGTCTAAGCTTTGGAACACTCTCACCTCACCTGCCGCCCAAGTCAAATC	0.614286	0.385714	0.74307	0.973211	0.230141	-9.4	0.696357
main_Ero1l_chr14:45284369-45284439_7915	Mouse 3' UTR GCLiPP Peak	No	chr14:45284369-45284439	Ero1l	3	53	5.58972	302.59	GAAAGTATATGTATTTAGTATACGTTAAGTGATGGTGATGTAGCTTGTTTAGTAATGTATCCTATTTCCC	0.314286	0.685714	0.43862	0.711465	0.272845	-9.1	0.516476
main_Mllt6_chr11:97682731-97682801_5006	Mouse 3' UTR GCLiPP Peak	No	chr11:97682731-97682801	Mllt6	46	1421	0.899458	1305.46	AAGTCTCCCTCTCCGAAGTAGCTAGCCTGCCTCTTGAATCCTTTCACCAGCTAGTAGAGCCACTTAAGCT	0.5	0.5	0.205493	0.556225	0.350732	-10.7	0.505413
main_Ywhag_chr5:135910553-135910623_20206	Mouse 3' UTR GCLiPP Peak	No	chr5:135910553-135910623	Ywhag	196	11336	1.02886	11912.5	TCTGTCCATGCCCTTGTCCTCAGTTCCGTGGCTGTTTTCTCTCTTTGGCTGTGCTTTCTCTCTCTCTCTC	0.514286	0.485714	0.960056	1.10152	0.141465	-6.1	0.404932
main_Rnf114_chr2:167515331-167515401_15633	Mouse 3' UTR GCLiPP Peak	No	chr2:167515331-167515401	Rnf114	63	4035	1.06985	4409.16	TAGCAAAGATGGGGTGTGTTCATGTGTAAGTAGGGAGAAGGTGTAGGGTGTGTGGCTTTTTGGTTTACTT	0.442857	0.557143	0.162901	0.64	0.477099	-9.1	0.51297
main_Ube2d3_chr3:135465238-135465308_16930	Mouse 3' UTR GCLiPP Peak	No	chr3:135465238-135465308	Ube2d3	10	496	1.46592	742.642	GATGCTACCTTACAGTCAGAATAACCTGCATTATAGCTGGAATAAACTTTAAATTACTGTTCCTTTTTTG	0.328571	0.671429	2.71311	2.71311	0	-7.4	0.45416
main_Cks1b_chr3:89415598-89415668_16321	Mouse 3' UTR GCLiPP Peak	No	chr3:89415598-89415668	Cks1b	38	1803	1.33844	2464.81	TGGCAGAAGCATGTGAAATCTAGATCATGGCTGTTACAAGGATGGTGTGAATTTGCTGACGTGTTTTTTA	0.4	0.6	0.529056	0.738606	0.209549	-13.8	0.563623
rapidmain_Ago2_chr15:73104636-73104706_8826	Mouse 3' UTR GCLiPP Peak	Yes	chr15:73104636-73104706	Ago2	42	1508	0.0959826	147.837	TGGCACTGTGTTCGAGGCCACCCCTCAACCCCCACCGTGGCTCTGTAGGCGCTTTCTGAGGCCGTCCCCC	0.671429	0.328571	-0.578155	0.849028	1.42718	-15.3	0.771271
main_Wbp5_chrX:136246974-136247044_27208	Mouse 3' UTR GCLiPP Peak	No	chrX:136246974-136247044	Wbp5	1	39	1.54096	61.3825	ATATTTTGAAAGACAGGAGTACCTTTGTATGTTACATATATGCACATATAAACTTGTGAAAGATGAATGA	0.285714	0.714286	0.811423	0.87993	0.068507	-9	0.313887
main_Appbp2_chr11:85188929-85188999_4725	Mouse 3' UTR GCLiPP Peak	No	chr11:85188929-85188999	Appbp2	35	1268	0.945907	1225.06	GGAGACTGAGTGAGGTAAGAGACTGAGTTCCAGGCAGCCTGGGCTACAAAGGGAGATTGTCTCCAAACTC	0.528571	0.471429	-0.0745493	0.501761	0.57631	-18.4	0.584701
main_Snx3_chr10:42535204-42535274_1903	Mouse 3' UTR GCLiPP Peak	No	chr10:42535204-42535274	Snx3	37	1626	1.76733	2935.12	GGTGTACTTTGTGTGCAGAATGTGTCTTCCTTCTGGCCTGTAATCCCCTTCCCATGAAAGATTAATGAGG	0.457143	0.542857	0.991704	1.0819	0.0901972	-8.1	0.428157
main_Ptma_chr1:86530585-86530655_596	Mouse 3' UTR GCLiPP Peak	No	chr1:86530585-86530655	Ptma	3	96	1.41074	138.327	CCTTTTCTTTCTGTCTATGAAGTTGCTGTTTATTTTTTTTTGGCCTGTTTGATGTATGTGTGAAACAATG	0.328571	0.671429	1.52903	1.60094	0.0719155	-5	0.34738
main_Mta1_chr12:113136956-113137026_6747	Mouse 3' UTR GCLiPP Peak	No	chr12:113136956-113137026	Mta1	31	1144	0.65481	765.12	TGCTGCAGGGCTTCTCACCCGGGGTGGGCTCTAAGGTTTTGTTGTGTTCTGTTGAAGGTGCCATTTTAAA	0.5	0.5	0.870958	1.2713	0.400338	-15	0.66267
main_Edem1_chr6:108855862-108855932_21516	Mouse 3' UTR GCLiPP Peak	No	chr6:108855862-108855932	Edem1	69	3051	1.53447	4781.78	CATAGCACCCAGTCTCCTTGCTTTGCCCCCGTTGCTGTGCTGAAGTCTTGCTACCTCTTTGCTAGAGGAT	0.528571	0.471429	-0.0856056	0.697972	0.783577	-13.9	0.671518
main_Rnf115_chr3:96790026-96790096_16630	Mouse 3' UTR GCLiPP Peak	No	chr3:96790026-96790096	Rnf115	9	339	3.06617	1061.66	CCAGGGCTGCCTGCGTTAGTCCTGTTATCATAGCTGTAAATTGTATCAAAACTAAACAAACAAAATAGTA	0.371429	0.628571	0.851606	1.04431	0.192704	-12.4	0.618596
main_Tuba4a_chr1:75215574-75215644_520	Mouse 3' UTR GCLiPP Peak	No	chr1:75215574-75215644	Tuba4a	44	1236	1.27514	1609.78	ACGAGGATGAGGGAGAAGAGTAGACCGCTACTTGGAGCCTGTTCACTGTGTTTATTGCAAAATCCTTTCG	0.471429	0.528571	1.235	1.34782	0.112817	-13.5	0.387205
main_Bccip_chr7:133721042-133721112_23656	Mouse 3' UTR GCLiPP Peak	No	chr7:133721042-133721112	Bccip	1	37	0.228768	8.64542	ATTTTGGTCAAATTATGAATGATTGGTTAAAAACTTCCAATAAGAAAAGCATGGAATAGTAATTTTAAGA	0.242857	0.757143	0.948845	0.985915	0.0370704	-4.4	0.369873
main_Mpdu1_chr11:69656732-69656802_4235	Mouse 3' UTR GCLiPP Peak	No	chr11:69656732-69656802	Mpdu1	18	565	1.10113	635.438	GGCAGGTCCTGGCGGAAGGGTGTGTGAAGGCGCTGGTTGCTGCTGTAGGGAGAGAATACAAATGGGACAA	0.571429	0.428571	0.710366	0.982592	0.272225	-16	0.473786
main_Atp6v1f_chr6:29470256-29470326_20646	Mouse 3' UTR GCLiPP Peak	No	chr6:29470256-29470326	Atp6v1f	25	828	0.242279	204.896	GACCTGCGCTAGGGCTGCTCAGCCCTCAGCCCTCCTCATCACCAGGCCTCTCCTGGTTTGCCATGCTCTA	0.628571	0.371429	0.331451	0.87407	0.54262	-21.3	0.525462
main_Rbpj_chr5:53653896-53653966_19216	Mouse 3' UTR GCLiPP Peak	No	chr5:53653896-53653966	Rbpj	8	262	1.41505	378.669	GGAAACAGATATGTGGCTGGAGCACAGGCTAAGCTAGAAGACACAAACCTAACATAGACTTATGGACCAA	0.442857	0.557143	1.54024	1.5528	0.0125634	-9.7	0.496412
main_S100pbp_chr4:129150321-129150391_18002	Mouse 3' UTR GCLiPP Peak	No	chr4:129150321-129150391	S100pbp	2	62	1.80211	114.12	CTAGATTAAAAGTGTAAATCCTCTCCTTTCTGTACCTATTAGCTGCCTTTTTAAAAAATTATTAGTGGCT	0.314286	0.685714	0.529676	0.799507	0.269831	-3.4	0.62022
main_Dpf2_chr19:5898496-5898566_12793	Mouse 3' UTR GCLiPP Peak	No	chr19:5898496-5898566	Dpf2	135	6497	0.556305	3691.59	AACTCCTCCTGATGTGCCACCCAGCTCCCCTGCATCTAAGGCCGTTGCTCTCCTCTCTACCTTGGTTTCC	0.571429	0.428571	0.782493	1.04145	0.258958	-7.5	0.562785
main_Ccdc115_chr1:34437253-34437323_75	Mouse 3' UTR GCLiPP Peak	No	chr1:34437253-34437323	Ccdc115	69	3842	0.784976	3080.36	TGAAGCAAAGCTGAGCAGTGTAGAGAGCACCTAGTTCTAGGCCATGGTCTCAGGGCATGACAGTGACGTG	0.528571	0.471429	0.112	0.594592	0.482592	-15.9	0.4863
main_Zfp36l1_chr12:80108600-80108670_6308	Mouse 3' UTR GCLiPP Peak	No	chr12:80108600-80108670	Zfp36l1	17	588	3.72262	2235.71	GGTGAGCAGTTAATGGTCTGCATTCCACATACAATATCTGTGTAAAACGATTTCCTGTAGAAGTAGCTTT	0.385714	0.614286	1.96552	1.99377	0.0282535	-10.4	0.476448
main_E2f2_chr4:136195525-136195595_18338	Mouse 3' UTR GCLiPP Peak	No	chr4:136195525-136195595	E2f2	77	3541	0.784532	2837.43	AGATGCACCATTGAAGATGTCAGGCTGAGTCCCTTCTCTGTGTGGCTGTGAGGAGTGGGAGTTTGGGGGA	0.542857	0.457143	-0.261592	0.650127	0.911718	-17	0.595416
main_Tmem57_chr4:134802962-134803032_18250	Mouse 3' UTR GCLiPP Peak	No	chr4:134802962-134803032	Tmem57	20	655	2.43724	1630.53	AAACAAACTTCTAGCTTTAGCCAGGTGTGCATGTTGTCGCCATTTGCATTTTGAGTCATCTTGTGTAAAT	0.385714	0.614286	1.96124	2.00121	0.0399718	-10.1	0.41746
main_Dusp11_chr6:85946206-85946276_21259	Mouse 3' UTR GCLiPP Peak	No	chr6:85946206-85946276	Dusp11	20	668	1.7309	1180.96	GTGAAAACCACCTTTATCATTGGATAACTCATAACTAACTTTCATTCTTACACACTCGTCTGGCTTCTGT	0.371429	0.628571	0.026169	0.597803	0.571634	-2.6	0.617918
main_Nlk_chr11:78568875-78568945_4570	Mouse 3' UTR GCLiPP Peak	No	chr11:78568875-78568945	Nlk	68	3544	1.58183	5725.86	GCCGTCTCCTCTGGTGTGGGAGTGACTGTGGAAGACACTGTACTACTGAAGATGTAATGTAGCTTTCACT	0.485714	0.514286	2.24611	2.28431	0.0381972	-18.1	0.612865
main_Ctdp1_chr18:80408261-80408331_12544	Mouse 3' UTR GCLiPP Peak	No	chr18:80408261-80408331	Ctdp1	6	162	1.73991	287.892	AGTAAGATTTAGAGAGCAATATAGCAAAACCTGTCATCTTGGACCTTTTTCACAGCTGATGCTATCATAA	0.357143	0.642857	-0.207662	0.667127	0.874789	-8.3	0.459398
main_Impad1_chr4:4765742-4765812_17088	Mouse 3' UTR GCLiPP Peak	No	chr4:4765742-4765812	Impad1	11	444	1.94453	881.833	CTAAGAATAGGAACATTGTGTGTTGGGCTCAGAAGCAAAGATGCTGGCTGAGAGGTGGAAGTAGTTTTTA	0.428571	0.571429	0.352268	0.653282	0.301014	-12.2	0.626386
main_Fam103a1_chr7:81769170-81769240_23038	Mouse 3' UTR GCLiPP Peak	No	chr7:81769170-81769240	Fam103a1	6	214	1.41997	310.371	AAGATTTTTGTAAACTTACAACAAGGAAGACATGGATGTGCGCTGTAACACAATACTCATGTAAATATTG	0.328571	0.671429	0.101014	0.591915	0.490901	-9	0.463561
main_D17Wsu92e_chr17:27753712-27753782_10918	Mouse 3' UTR GCLiPP Peak	No	chr17:27753712-27753782	D17Wsu92e	19	796	0.467883	380.398	ATGCATGTGTGAATGCTGAACTGCAGGAGTGGTGTTGAGGCGACCGAGAAGATCCACGCAGCCATCTTGG	0.542857	0.457143	1.39199	1.46779	0.0758028	-13.6	0.659636
main_Ppp1cb_chr5:32492066-32492136_19074	Mouse 3' UTR GCLiPP Peak	No	chr5:32492066-32492136	Ppp1cb	9	385	1.27516	501.434	GTGAAGGATGTATTTAAATGAACGCTGGTCAGTGGGACATTTGTCAGCTCTGAATATTGGGTGCTTCACT	0.428571	0.571429	1.63277	1.697	0.0642254	-18.1	0.473409
main_Trp53inp1_chr4:11172962-11173032_17127	Mouse 3' UTR GCLiPP Peak	No	chr4:11172962-11173032	Trp53inp1	10	411	2.77205	1163.67	CCATGCAGACTGTTCTTGTTTTATTAGGTCTTTGGTTTTAGCAAAAAGAGTGTTTACTTAAAATGTGTGA	0.328571	0.671429	0.778648	0.842479	0.063831	-7.5	0.482645
main_Arhgdia_chr11:120578938-120579008_5876	Mouse 3' UTR GCLiPP Peak	No	chr11:120578938-120579008	Arhgdia	82	2428	0.403002	999.411	GTGGGGGAGGGGTTCCAGCCCAGGCCTCCAATCTGCTGTGTCCCTCCAGGTTCCCTCTGTCTTCCCTTCC	0.642857	0.357143	-0.147887	0.667155	0.815042	-18.8	0.556121
main_Rbm22_chr18:60572633-60572703_12354	Mouse 3' UTR GCLiPP Peak	No	chr18:60572633-60572703	Rbm22	4	97	4.11878	408.064	AAGTTTGGATTTAACTGAATTGTAGATGGTAAGGGAAATTTGATGTTGTATTGTATTTTTTGTTTTTAAT	0.242857	0.757143	1.17786	1.19924	0.0213803	-3.5	0.481255
main_Arpc5_chr1:152775209-152775279_1193	Mouse 3' UTR GCLiPP Peak	No	chr1:152775209-152775279	Arpc5	1	11	0.0769494	0.864542	AAGATTTGGTTCTGATCCAAAGACACAGTCTGTGTTTCAGCTCAGTGTTTTTAAGAAAGAAAAATGCCAC	0.371429	0.628571	1.12151	1.20334	0.081831	-13.4	0.484077
main_Tpm4_chr8:72151985-72152055_24351	Mouse 3' UTR GCLiPP Peak	No	chr8:72151985-72152055	Tpm4	14	594	1.08727	659.646	TTGAGCACCAGTTAAGTTTAATTCTTTCCTTTTCCATTCAAATGGCACCAGCTTCTCTGATTATTCTTAT	0.342857	0.657143	0.826648	0.971211	0.144563	-5.2	0.603183
main_Tmppe_chr9:114408324-114408394_26528	Mouse 3' UTR GCLiPP Peak	No	chr9:114408324-114408394	Tmppe	30	1194	1.05203	1282.98	CAGGAGTTCCGAGCACTAGGAGAGATTTTGTAAAGACCATGACCTGTTGTTGGGATTCTAGGAGAGGCCA	0.485714	0.514286	0.00516901	0.471845	0.466676	-16.3	0.687876
main_Dynll1_chr5:115298513-115298583_19694	Mouse 3' UTR GCLiPP Peak	No	chr5:115298513-115298583	Dynll1	7	295	1.31127	395.096	ATCTGTTGTGTTGTGTACAGGGCTTCATTCTCTGTACAAGTCTGTGGTTATAAAATTAGTAAAACAGCTT	0.357143	0.642857	1.44586	1.54746	0.101606	-14.2	0.581969
main_Mid1_chrX:169989780-169989850_27352	Mouse 3' UTR GCLiPP Peak	No	chrX:169989780-169989850	Mid1	71	2135	0.380206	829.096	TGCCTCAGAAAATCACTCACAGTCATCCCCCTGTCTCACACGGTCACTCAGGGTCATCCCCCTGCTTCAG	0.557143	0.442857	0.0206479	0.0318592	0.0112113	-9	0.490296
main_Rbms1_chr2:60751985-60752055_14326	Mouse 3' UTR GCLiPP Peak	No	chr2:60751985-60752055	Rbms1	14	367	2.62697	984.713	CCCTAATAGTGTGACTGATTTAGGATATCTGCTGTATGATGCAATGTAAAGTCTTTTTTGCCTTTTTTTC	0.342857	0.657143	2.22552	2.22552	0	-9.4	0.498741
main_Tnpo1_chr13:98843123-98843193_7545	Mouse 3' UTR GCLiPP Peak	No	chr13:98843123-98843193	Tnpo1	63	3076	1.42734	4484.38	AAGCATATGCACATGGGGCACATACACAGCTACAGAGTGAGAGTTGGTTTGGATCCTCTTCATTTCATTT	0.428571	0.571429	1.97772	2.00177	0.0240563	-11.4	0.571727
main_Kpnb1_chr11:97161769-97161839_4960	Mouse 3' UTR GCLiPP Peak	No	chr11:97161769-97161839	Kpnb1	1	12	3.31524	40.6335	TCTGGAGTTAGAGGATATAGAAAATAAAAGTACAGTTGTTACAAAGAAAATGCAGACTTCAAAGACAGAA	0.314286	0.685714	1.35115	1.38152	0.0303662	-4.4	0.377375
main_Ddx19b_chr8:111005691-111005761_24902	Mouse 3' UTR GCLiPP Peak	No	chr8:111005691-111005761	Ddx19b	21	1129	1.79485	2069.71	GTGTGCACTACCACACCCCGCACGATATAGTTTTTGCTGGTGTTAATTATGAATTGTTCATGTTACTAAG	0.4	0.6	0.295324	0.630507	0.335183	-10.9	0.647976
main_Capzb_chr4:139291349-139291419_18427	Mouse 3' UTR GCLiPP Peak	No	chr4:139291349-139291419	Capzb	18	786	1.32351	1062.52	CATTTATAGGCACAGATACACTGTCTGACACCGCTCCCTCCATCTTTTTGTTACATTGGTGTAAAAAATG	0.4	0.6	1.60008	1.70625	0.106169	-9.8	0.49818
main_Ccdc47_chr11:106200145-106200215_5449	Mouse 3' UTR GCLiPP Peak	No	chr11:106200145-106200215	Ccdc47	56	2121	0.329239	713.247	TGCATGACAAGGTGAAGTGCTTCACCTAGCTCCCTCCGCTCAGCAGCAGTCAGGTGGCTGGGCTCTGTGA	0.585714	0.414286	0.634254	0.787042	0.152789	-21.7	0.494544
main_Rab8a_chr8:72180164-72180234_24368	Mouse 3' UTR GCLiPP Peak	No	chr8:72180164-72180234	Rab8a	56	1947	0.17694	351.869	TGTGCTCAGCCCAGCTGACTGTGCCTGCCCCGGGCCAGCCTCCACCTCTGATGTTTGGACACGGCTGCCC	0.671429	0.328571	0.608648	1.08854	0.479887	-22	0.609411
main_Txn1_chr4:57943779-57943849_17404	Mouse 3' UTR GCLiPP Peak	No	chr4:57943779-57943849	Txn1	2	45	1.10978	51.008	AATTTGCAAAAAACTATGAAGTGTGGAGAGTCTATACCCAACTGCCATCTGATTATAAATGACAATAAAA	0.314286	0.685714	1.11418	1.22275	0.108563	-5.2	0.416333
main_Ero1l_chr14:45285921-45285991_7922	Mouse 3' UTR GCLiPP Peak	No	chr14:45285921-45285991	Ero1l	19	993	1.73721	1761.94	GAATCTGAAGGGCAGAATCTCTCTGAGCACCATGGTTGCAATGACTGTCCTAAGCCAAACGTTTATATAA	0.428571	0.571429	1.1288	1.15272	0.0239155	-11.2	0.573983
main_Khdrbs1_chr4:129715921-129715991_18048	Mouse 3' UTR GCLiPP Peak	No	chr4:129715921-129715991	Khdrbs1	20	793	2.04513	1656.46	TTGTCTAAGTGTTTTTCTTCGTGGTCCCTTTCTTTTCCCCACTTCCTCCATTCTTAACTCTGCATTCTGG	0.428571	0.571429	2.617	2.63207	0.0150704	-3.3	0.512003
main_Rbm25_chr12:83681853-83681923_6344	Mouse 3' UTR GCLiPP Peak	No	chr12:83681853-83681923	Rbm25	22	606	1.96526	1216.41	TATCTGATAGCATCTTGTTCTGCTGATTTGTTCCTTGTAAATATTAAAATGGCTCCCCAATTCTTTTGCA	0.342857	0.657143	2.00534	2.0072	0.00185915	-5.4	0.483752
main_Arl6ip1_chr7:118119066-118119136_23319	Mouse 3' UTR GCLiPP Peak	No	chr7:118119066-118119136	Arl6ip1	55	2910	1.70336	5062.76	CTCACCTCCCTAGCACTGTAAGCAGCGGTGCCTCTTGTAGCATGTGTGTTTGTTTTTTAATGTTTCATGA	0.442857	0.557143	0.474437	0.770944	0.296507	-12.4	0.488076
main_Usf2_chr7:30946458-30946528_22645	Mouse 3' UTR GCLiPP Peak	No	chr7:30946458-30946528	Usf2	12	503	0.572149	293.944	AGCCCTTAGCACAGAGAGGGAGATGCCCCTCCCCAAGCTGCGTTTTTTTATAGTAGATTTTTAACAAAAA	0.428571	0.571429	2.08323	2.11607	0.0328451	-13	0.600921
main_Zfp830_chr11:82765586-82765656_4662	Mouse 3' UTR GCLiPP Peak	No	chr11:82765586-82765656	Zfp830	6	211	1.70893	368.295	GTAATACTTTGGGGATGGTACTGTGTGCGGTGCTATTTATTATAAAATGTTTGAGGTAAAACCGTTTTTG	0.357143	0.642857	0.53807	0.788775	0.250704	-13.1	0.580403
main_Got1_chr19:43499930-43500000_13334	Mouse 3' UTR GCLiPP Peak	No	chr19:43499930-43500000	Got1	89	4203	0.684727	2939.44	GCCACCCATCTCTGTCTCTCGTCACCCTGATCTCCCCGCACGGTTGTGTCCCTGGTCTGGAACATTAGTT	0.571429	0.428571	0.542803	0.868718	0.325915	-9.3	0.401114
th2_Ago2_chr15:73102881-73102951_4582	Mouse 3' UTR GCLiPP Peak	No	chr15:73102881-73102951	Ago2	3	49	0.742797	37.1753	TCACAGGAACCTGCAGGGTCCTTCAGCATGGCCCTGAACTCTTGGATTGTTACAAGGATTTTTTTTTTTT	0.428571	0.571429	NA	NA	NA	-16.9	0.662983
main_Gnas_chr2:174334213-174334283_15779	Mouse 3' UTR GCLiPP Peak	No	chr2:174334213-174334283	Gnas	22	1383	0.92968	1313.24	GCTGGAGAGTCTGGCAAAAGCACCATTGTGAAGCAGATGAGGATCCTGCATGTTAATGGGTTTAACGGAG	0.485714	0.514286	2.33111	2.37968	0.0485634	-18.7	0.527226
main_Ptp4a2_chr4:129849067-129849137_18066	Mouse 3' UTR GCLiPP Peak	No	chr4:129849067-129849137	Ptp4a2	81	4058	0.94281	3907.73	TCACGGCATCATGTGGCAGTGGTGTGGGGTCTCTGCTCAGTGTGTTGATACAGAAAAGCTGTTTTTCCTT	0.485714	0.514286	0.407944	0.490141	0.0821972	-15.1	0.500627
main_Rbms1_chr2:60750868-60750938_14317	Mouse 3' UTR GCLiPP Peak	No	chr2:60750868-60750938	Rbms1	11	313	2.16073	690.769	GATAGATGTCAGCGACATTTCATAGTTTCAAAAATCCTTGCTGCTCTGAAAGTGTAGATTCTAGTGAAAA	0.357143	0.642857	2.40365	2.40365	0	-11	0.577056
main_Rbms1_chr2:60752398-60752468_14331	Mouse 3' UTR GCLiPP Peak	No	chr2:60752398-60752468	Rbms1	90	5124	1.20425	6302.51	CGCAGTAACTCAGTGTTGGCCTCACTGTCTTTGCTTAGCTCTCCGTTTTTTTCTTTCGACGTAGTGTGAA	0.457143	0.542857	1.28392	1.39808	0.114169	-11.6	0.546488
main_Ybx3_chr6:131365327-131365397_21925	Mouse 3' UTR GCLiPP Peak	No	chr6:131365327-131365397	Ybx3	5	86	1.63383	143.514	AAGAATTAATGACCATTCAAAAACAAGGCAAAAAAGCACACCCACGACCTTACCAACACCAAAGAAACAT	0.371429	0.628571	1.24756	1.29373	0.046169	-1.4	0.441243
main_Ppdpf_chr2:181188427-181188497_15867	Mouse 3' UTR GCLiPP Peak	No	chr2:181188427-181188497	Ppdpf	6	415	1.12791	478.092	GTTCACAGCACTGAACTTTCCTGACCCCATAACTGTGTCTTGGCACAAAGCAGAAAATAAACTCACAGCA	0.442857	0.557143	0.0458732	0.656746	0.610873	-8.3	0.65243
main_Eif4g2_chr7:111072482-111072552_23289	Mouse 3' UTR GCLiPP Peak	No	chr7:111072482-111072552	Eif4g2	7	207	2.54751	538.61	CTTCTGCATAAGGTTTTTGTAGTGTGATGTCTTAATCATAGTCTACCATCAAATACTTTAGGAGTATCCT	0.342857	0.657143	2.6288	2.63303	0.00422535	-12.2	0.406769
rapidmain_Rfc5_chr5:117379174-117379244_19756	Mouse 3' UTR GCLiPP Peak	Yes	chr5:117379174-117379244	Rfc5	48	1543	0.44873	707.195	TTGGGGGGAATGGGGCACTGCAGACGTTCCTGCCGCACTGCTGGGCTGTGTTTTTACCAAGTCCTTCACA	0.571429	0.428571	-0.378282	0.692141	1.07042	-22.2	0.532074
main_Srf_chr17:46548823-46548893_11438	Mouse 3' UTR GCLiPP Peak	No	chr17:46548823-46548893	Srf	51	2007	0.383367	785.869	TCCTTCCTGCTCTGCCTGTCATGCTGTTGATGGTGCAGCTCTCCTCCCTCCTCAGACCCCCTGCCAGCCT	0.614286	0.385714	0.839986	1.0019	0.161915	-11.6	0.572431
main_Socs3_chr11:117966164-117966234_5758	Mouse 3' UTR GCLiPP Peak	No	chr11:117966164-117966234	Socs3	16	500	0.990339	505.757	CCACTCAGGCCTTCGAGGCTGTCTGAAGATGCTTGAAAAACTCAACCAAATCCCAGTTCAACTCAGACTT	0.471429	0.528571	1.33924	1.39214	0.0529014	-12.1	0.612644
main_H3f3a_chr1:180802894-180802964_1585	Mouse 3' UTR GCLiPP Peak	No	chr1:180802894-180802964	H3f3a	15	406	1.7325	718.434	AAGTATATGATTGCGAGTGGAAACATAGGGGACAGAATCAGGTATTGGCGTTTCTCCACGTTCATTTGTG	0.428571	0.571429	2.03623	2.04848	0.0122535	-11.6	0.423234
main_Stat6_chr10:127660326-127660396_3029	Mouse 3' UTR GCLiPP Peak	No	chr10:127660326-127660396	Stat6	18	699	0.80285	573.191	CAGAGGGCATATAGGCCTAGGGCATTGAAGCTGGGCTCAGGTGACTCTGGGAGGGAGAAAAAGGAAAAAG	0.528571	0.471429	-0.158972	0.632887	0.791859	-19.5	0.57585
main_Bub3_chr7:131571055-131571125_23647	Mouse 3' UTR GCLiPP Peak	No	chr7:131571055-131571125	Bub3	27	1523	2.95449	4595.91	TGTATCCTTGTACAGTAGTCTTGACGATTCTCCTCCCCTACGCCATTTTTGTTTGTGTTTGCTATCTAAA	0.4	0.6	0.213268	0.888563	0.675296	-5.1	0.463248
main_Ube2d2a_chr18:35806568-35806638_12138	Mouse 3' UTR GCLiPP Peak	No	chr18:35806568-35806638	Ube2d2a	1	34	14.8874	516.996	TACTAAAAAAGATATAAAAGTAATTTTATTAAACAAGGTAGAGGCATAAGCTTAAAGGCATTTTCATGAA	0.242857	0.757143	0.987831	1.03901	0.0511831	-4.2	0.528953
main_Atp13a3_chr16:30315176-30315246_10194	Mouse 3' UTR GCLiPP Peak	No	chr16:30315176-30315246	Atp13a3	4	148	0.846443	127.952	TTTTATGACCTGGAGTTAGGAGTGAGTTTGTGTGTTGTTGATAGAGCAACTCAGGTAATTTCCATTTCTG	0.385714	0.614286	1.00528	1.17607	0.170789	-14	0.456246
main_Fam60a_chr6:148922753-148922823_22107	Mouse 3' UTR GCLiPP Peak	No	chr6:148922753-148922823	Fam60a	8	389	1.94747	773.765	GACCACAAAACAAACTGACCCTCCTATTTTTAACTTGGATACCTGCTATTCTGCCAAAAGACATTTTCTA	0.371429	0.628571	0.98907	1.05662	0.0675493	-2.3	0.452425
main_Napa_chr7:16117052-16117122_22250	Mouse 3' UTR GCLiPP Peak	No	chr7:16117052-16117122	Napa	5	95	0.552416	53.6016	TCCATGCATCCAGGTCTATCGACCTGAAGCTGCAGCTGGCCCAAAAAGGACAATAAAACCTGCCACTTTT	0.485714	0.514286	0.692704	1.08149	0.388789	-16.1	0.627126
main_Dazap2_chr15:100619488-100619558_9692	Mouse 3' UTR GCLiPP Peak	No	chr15:100619488-100619558	Dazap2	52	2377	0.782702	1900.26	TTTGGTGAGGAGCCATGGCCACTCCTGTGCCGGGGAAGACATCACATACCTTCAGCACTTCTCACAATGT	0.528571	0.471429	2.07108	2.07134	0.000253521	-19.4	0.616285
main_Gm4737_chr16:46153062-46153132_10399	Mouse 3' UTR GCLiPP Peak	No	chr16:46153062-46153132	Gm4737	37	1156	2.00042	2361.93	AGGCCTGTCACTTCTGTATAGTTGATGGTTCCTGTCACAAGCCCAGGTCACAAACAGATTAATTTGTTTT	0.414286	0.585714	0.311704	0.66269	0.350986	-14.5	0.506117
main_Dek_chr13:47085791-47085861_7140	Mouse 3' UTR GCLiPP Peak	No	chr13:47085791-47085861	Dek	6	404	1.02453	422.761	TGTACATTTTGGGTTTCTTTATTGTAAGGTCACAGATTCCTGAACTATTGTGAATTTTAGTGAACTTAAT	0.3	0.7	1.39349	1.43693	0.0434366	-8.3	0.405075
main_Mif4gd_chr11:115608310-115608380_5605	Mouse 3' UTR GCLiPP Peak	No	chr11:115608310-115608380	Mif4gd	91	3030	0.67045	2074.9	GGTCTGCACATGCCTTCCCGTGACCCTCTTTTCAAGCTGGCACCAGAATCCTTGCTTCAGCCCCTTCTAG	0.557143	0.442857	0.0370704	0.735634	0.698563	-9.9	0.54024
rapidmain_Rnf187_chr11:58933176-58933246_4028	Mouse 3' UTR GCLiPP Peak	Yes	chr11:58933176-58933246	Rnf187	70	2777	0.553221	1569.14	CTTGACAGCCTGGGATGAAGCATCAGAGGTGCCCCGCTGGCCATGCACATAGTTCCATTGTTCAGCAGTG	0.557143	0.442857	-0.337592	0.721958	1.05955	-15.3	0.644252
main_Desi1_chr15:81993526-81993596_9298	Mouse 3' UTR GCLiPP Peak	No	chr15:81993526-81993596	Desi1	8	228	0.137361	31.9881	GGGAGCTCAGAGCAGGCACCTGAGACTCAGCTCCACACCCATGGGGAGCCCCCCACCGTGGCTTCCTGCC	0.685714	0.314286	0.228507	0.631887	0.40338	-25.3	0.584035
main_Gnb2l1_chr11:48806028-48806098_3683	Mouse 3' UTR GCLiPP Peak	No	chr11:48806028-48806098	Gnb2l1	4	246	1.46235	367.43	CTATTGGTACCCGCTAAAAGTTTTATGACAAAGTCTTAGAAATAAACTGGCTTTCTGAAACTGGCTTCTA	0.357143	0.642857	0.606141	1.11546	0.509324	-10.3	0.658112
main_Rab8a_chr8:72180119-72180189_24367	Mouse 3' UTR GCLiPP Peak	No	chr8:72180119-72180189	Rab8a	47	1103	0.316937	357.056	CGGTGCAGTCTCCTGTGAGGACAAGGTCTCTGCCCATTCTGAGCCTGTGCTCAGCCCAGCTGACTGTGCC	0.614286	0.385714	0.880408	1.27176	0.391352	-30.9	0.560175
main_Mtch1_chr17:29332503-29332573_10987	Mouse 3' UTR GCLiPP Peak	No	chr17:29332503-29332573	Mtch1	14	475	0.155033	75.2152	GGGCTGGTGGAGGTGGGTCACCTGGGACCTGGGGAAGCCTGGGGGAGCAGTGTTGGGGTGGCATCCCCTT	0.685714	0.314286	-0.0356761	0.611366	0.647042	-24.2	0.580051
main_Nip7_chr8:107058499-107058569_24777	Mouse 3' UTR GCLiPP Peak	No	chr8:107058499-107058569	Nip7	33	1388	1.33248	1889.02	GGTCATTCCAAGAACATTTTGCTGTGTGAGAGGACTTAGCTTTGTTTCCTGTGTGCGGCCATCAGATTAA	0.442857	0.557143	0.826873	1.03966	0.212789	-13.2	0.41771
main_Dusp11_chr6:85946875-85946945_21260	Mouse 3' UTR GCLiPP Peak	No	chr6:85946875-85946945	Dusp11	57	3272	1.37832	4606.28	CCTTGGATATCTGGGAAAGCTGAGGGTTATACTGACTCCGAGGACCTCAATTCAGGATCTCTGTCCACTG	0.5	0.5	0.193366	0.713	0.519634	-14.9	0.665818
main_Rab11fip4_chr11:79694760-79694830_4604	Mouse 3' UTR GCLiPP Peak	No	chr11:79694760-79694830	Rab11fip4	11	478	1.39893	682.988	TTCCATGTAACACACCTCAGGCGAAATCCAGCCTTCTTACAGAATACACTTAGAAAACTCTGTCAACTTC	0.414286	0.585714	0.0203239	0.540437	0.520113	-8.1	0.731359
main_Spcs3_chr8:54522846-54522916_24147	Mouse 3' UTR GCLiPP Peak	No	chr8:54522846-54522916	Spcs3	20	741	2.31087	1748.97	AATTGTATCCTTTGTGTTCATGCAAGGCAGTTGTGACTTACTCATGGGCATTCTCTTATATCTCTAAGTG	0.385714	0.614286	0.377944	0.687549	0.309606	-11	0.588263
main_Ube2h_chr6:30214400-30214470_20679	Mouse 3' UTR GCLiPP Peak	No	chr6:30214400-30214470	Ube2h	86	2961	0.523703	1583.84	CTCCCTAGTCCTGAGTGGTCCTTGGTGAGGAGCAGCAAGATGCAGCGAGTTGAGTGAGACTTAGGGCTTT	0.542857	0.457143	0.421775	0.799859	0.378085	-21.6	0.725606
main_Nxf1_chr19:8765558-8765628_12955	Mouse 3' UTR GCLiPP Peak	No	chr19:8765558-8765628	Nxf1	98	3896	0.709787	2824.46	TGATGTTGATGCCTCTTGGAGGCTGGTACCATGCTATTGGTCTCTCTTGCCCAGTGCTGTGAACTGGGCC	0.542857	0.457143	0.710127	0.884437	0.17431	-23.9	0.634078
main_Scamp3_chr3:89182650-89182720_16303	Mouse 3' UTR GCLiPP Peak	No	chr3:89182650-89182720	Scamp3	39	1454	0.310285	460.801	TCTGGCCACACTGCTGCCGCCACCTCTCACACAACCCCAACCCCAGTTTCCTTCTGCTGTGCCAAGGATG	0.6	0.4	0.771662	0.918535	0.146873	-8.6	0.477861
main_Ufc1_chr1:171288597-171288667_1429	Mouse 3' UTR GCLiPP Peak	No	chr1:171288597-171288667	Ufc1	51	1906	0.798037	1553.58	CAAGTAGAGCCCTGGAGGCATTTTGGAGGCCTGGGGTGTAACTTACAGCACATAGCTTTTTGGTTTCTGG	0.5	0.5	0.303085	0.663197	0.360113	-15.7	0.52052
main_Ranbp3_chr17:56711644-56711714_11632	Mouse 3' UTR GCLiPP Peak	No	chr17:56711644-56711714	Ranbp3	103	4218	0.692928	2985.26	CACACTGCTTCCAGCCTTAGCCAGCCAGTGACAAGTGAATCCAGACGTCACCCATGTGTTTTGGAACATT	0.5	0.5	1.36941	1.44073	0.0713239	-13	0.598677
main_Manf_chr9:106888790-106888860_26333	Mouse 3' UTR GCLiPP Peak	No	chr9:106888790-106888860	Manf	32	1313	1.40085	1878.65	CCCATCCCCAAGTGGGGACAATTTACTTCCTTCTTTGCTGGTTTACTCTAGGACTTCAAAGTTTGTCTGG	0.457143	0.542857	1.0348	1.15675	0.121944	-14	0.521214
main_Mat2b_chr11:40679986-40680056_3596	Mouse 3' UTR GCLiPP Peak	No	chr11:40679986-40680056	Mat2b	9	439	1.62733	729.673	GACAAGAGATGGAGACAGACTGTCTTTCATTAGCTCATGTGTTGTGTATTTTTTTAAATGAAAAGTATAG	0.328571	0.671429	0.883676	1.28796	0.404282	-14.9	0.460006
main_Btg1_chr10:96619074-96619144_2772	Mouse 3' UTR GCLiPP Peak	No	chr10:96619074-96619144	Btg1	2	36	2.58635	95.0996	GCTCAATAGGAAAGCTCAATGTTTTAAGCATGGTAGTACTGGAAAAATTTTTACACGGAGACTTTTACCT	0.357143	0.642857	1.55715	1.62651	0.0693521	-6.7	0.470693
main_Zbtb7a_chr10:81149282-81149352_2525	Mouse 3' UTR GCLiPP Peak	No	chr10:81149282-81149352	Zbtb7a	7	342	0.403422	140.92	AACCCCAGGGACTCAGGCAGAGACAGACAAGGGAGTGAGAGAGGCCACAGCTTAATGTCACAAAACAGCA	0.528571	0.471429	0.668732	0.993211	0.324479	-13.1	0.648484
main_Ccdc59_chr10:105847199-105847269_2805	Mouse 3' UTR GCLiPP Peak	No	chr10:105847199-105847269	Ccdc59	46	1508	2.26598	3490.16	GACTGAATCCTGACTGACTGTCGCATCCTTTTGTATGTGTATGGGAACCTCCTAATAATGAACTCAATTT	0.4	0.6	-0.235437	0.633408	0.868845	-7	0.512772
main_Ubl3_chr5:148505792-148505862_20533	Mouse 3' UTR GCLiPP Peak	No	chr5:148505792-148505862	Ubl3	23	738	1.09877	828.231	CGCAGAGACTCCTCCCTCCGCAGAAGTCTGAAGGCAAGTGCTGCAAGTACAATTTGCACTAAAAATAATT	0.457143	0.542857	1.18004	1.26193	0.0818873	-12.6	0.598703
main_Noct_chr3:51251504-51251574_16054	Mouse 3' UTR GCLiPP Peak	No	chr3:51251504-51251574	Noct	8	191	1.58653	309.506	TTCTCTTTCAATTGTTGAAGCCTCTTCCAAACAAAATATCCTTCCAGTGGTAAAATGGTAAATATCTTAA	0.314286	0.685714	0.501394	0.715254	0.213859	-4.2	0.389957
main_Knop1_chr7:118845240-118845310_23346	Mouse 3' UTR GCLiPP Peak	No	chr7:118845240-118845310	Knop1	31	2524	0.979245	2524.46	TTCCATCTGACTGCTGTGCTTGGATTTGATGCTGCTGTATTGGCTGGATCTCAAGGCATTTTGGACAGTA	0.457143	0.542857	0.0177324	0.527958	0.510225	-16.2	0.575565
main_Ube2i_chr17:25262274-25262344_10792	Mouse 3' UTR GCLiPP Peak	No	chr17:25262274-25262344	Ube2i	62	2065	0.823899	1737.73	GTACAGTTACTAGTCGCCTGGGAGGGTTGAGCGGGCGCCATTTTCCATTTCCGCCACTGGCATATTCAGT	0.542857	0.457143	0.963789	1.13568	0.171887	-13.3	0.475142
main_Lsm8_chr6:18853677-18853747_20604	Mouse 3' UTR GCLiPP Peak	No	chr6:18853677-18853747	Lsm8	49	1603	0.823738	1348.69	CCGTAGCACACTGAGACCTCAGTGTGTAGTGAGATGTGTGTAAATCCTGTACAGAAGCGTCTGTCCTGAG	0.5	0.5	1.02227	1.17993	0.157662	-19.8	0.591812
main_Cops7a_chr6:124959386-124959456_21768	Mouse 3' UTR GCLiPP Peak	No	chr6:124959386-124959456	Cops7a	107	5278	0.743645	4008.88	AGCCACACCCTCTGTAGGGAGGAGGCCAGTGCAGGTCATGTTCTGTTGGTACCTCTTATGTGTTCCATGC	0.542857	0.457143	0.722225	0.872479	0.150254	-18.8	0.594948
main_Atp11b_chr3:35855833-35855903_16006	Mouse 3' UTR GCLiPP Peak	No	chr3:35855833-35855903	Atp11b	60	3151	1.37027	4410.03	GGGAGTTTTGCATCTCATGTCCAAGTCAGAATTAGGGCCATTTACTAGACTTCAAATTGGTGTTTGCTAA	0.4	0.6	0.473	0.828042	0.355042	-9.7	0.427638
main_Ube2v1_chr2:167607890-167607960_15639	Mouse 3' UTR GCLiPP Peak	No	chr2:167607890-167607960	Ube2v1	20	391	0.251119	100.287	TGCAGATCCGTGGGCCTGGCCTCCTGGCTCACTGCCACGCTCCCCACTCTGTTCAGGACCACTAAATGTT	0.6	0.4	0.899761	1.03489	0.135127	-19.5	0.548446
main_C1d_chr11:17266983-17267053_3439	Mouse 3' UTR GCLiPP Peak	No	chr11:17266983-17267053	C1d	13	449	1.03119	472.904	GATATTATGAAGTGTGCTATCTGTAGACTGGAGGTGTAAGGACATTTGTTTTCAGTAATGATGAGAAATA	0.342857	0.657143	0.557127	0.724761	0.167634	-10.8	0.425279
main_Myl6_chr10:128490889-128490959_3125	Mouse 3' UTR GCLiPP Peak	No	chr10:128490889-128490959	Myl6	78	2077	0.628414	1333.12	GTGTGGCTCCAGAGGCTCCCCTGTCACAGCACCTTGCCCATTTGGTTTCTTTTGGATGATGTTTGCCTTC	0.528571	0.471429	0.568183	0.740465	0.172282	-12.5	0.430257
main_Ctbp1_chr5:33248010-33248080_19104	Mouse 3' UTR GCLiPP Peak	No	chr5:33248010-33248080	Ctbp1	35	810	1.29683	1072.9	AATGAATCCTTCCTGTTTTTCTTTTTATGCCACACAGTGCATTGTTTTTCTACCTGCTTGTCTTATTTTT	0.328571	0.671429	1.15954	1.22973	0.0701972	-3.5	0.415778
main_H3f3a_chr1:180802669-180802739_1583	Mouse 3' UTR GCLiPP Peak	No	chr1:180802669-180802739	H3f3a	12	287	0.743219	217.865	AATTTCTTATTGACGGCAACTAAATGGTGTTTGTAGCATTTTTATCACACAGTAGATTCCATCCATTCAC	0.342857	0.657143	1.9877	2.05832	0.0706197	-5	0.425796
main_Gna13_chr11:109397951-109398021_5500	Mouse 3' UTR GCLiPP Peak	No	chr11:109397951-109398021	Gna13	32	1488	0.598426	909.498	ATGAGGCCCAAAAGCAGTGGCTTTCTTCTTTTCTTGCTGGAGGGTGCCAGAGCTGGGCCCTAGTGTATGT	0.528571	0.471429	-0.0298732	0.608521	0.638394	-26.1	0.66314
main_Smim14_chr5:65450075-65450145_19281	Mouse 3' UTR GCLiPP Peak	No	chr5:65450075-65450145	Smim14	29	1118	0.931996	1064.25	CCCTGCAACCCTGACTAGAACGTCTGTGGTGGTTTCTGGCCCAGCTGAAGGAAAATTGAGATTTCTGCAT	0.5	0.5	1.13373	1.22134	0.0876056	-10.5	0.637201
main_Tsn_chr1:118299658-118299728_769	Mouse 3' UTR GCLiPP Peak	No	chr1:118299658-118299728	Tsn	96	5722	1.35265	7905.37	AGGCTGGTGATGTAGCTTTTAGTGATAGACTTGCTTGGCAATGTGAGGCAATGGTCCATCCTAGGACTTC	0.471429	0.528571	0.031338	0.720718	0.68938	-20.2	0.39993
main_Klf16_chr10:80568266-80568336_2408	Mouse 3' UTR GCLiPP Peak	No	chr10:80568266-80568336	Klf16	31	939	0.265922	255.04	TAGGGCTGTGGGGTACAGGTGGGGCACGTGGAGGTGCATCCCCCACATCCCCGCTCACCTTGGGTGTGGT	0.657143	0.342857	-0.239408	0.643296	0.882704	-28.4	0.600359
main_Nup50_chr15:84940028-84940098_9404	Mouse 3' UTR GCLiPP Peak	No	chr15:84940028-84940098	Nup50	4	278	0.660713	187.606	AACTAAGCAAAATACATTGGAGTGAAAAGTGTGGGAAGATGGTTTTTAATGTTGATTCATTGAGTAAACT	0.314286	0.685714	0.574437	0.756915	0.182479	-7.7	0.552398
main_Ppp1r15b_chr1:133139143-133139213_971	Mouse 3' UTR GCLiPP Peak	No	chr1:133139143-133139213	Ppp1r15b	5	163	3.13132	521.319	TAGAAGCTATGTTTGGAAAGCAGGCAAGTTGACTTTAGGAAGAAAAGCTGTGACAGTGTGTAGACATTTC	0.4	0.6	0.0682113	0.737648	0.669437	-9.5	0.43818
main_Ndufa2_chr18:36742517-36742587_12185	Mouse 3' UTR GCLiPP Peak	No	chr18:36742517-36742587	Ndufa2	12	352	0.391961	140.92	GTGCTAAGCGGCAAAGCCTGAAGGTCTCCACTGAGGACTGTGAGCGAGAGCAGCTGAACCTGCTGGACTG	0.585714	0.414286	0.791676	0.910437	0.118761	-15.2	0.5179
main_Elavl1_chr8:4288685-4288755_23838	Mouse 3' UTR GCLiPP Peak	No	chr8:4288685-4288755	Elavl1	46	2451	1.21873	3050.97	GCATGGTGCCCACACATCAGATACTGTTGTTCATGCAACTTCCCGAGTTTCCAAGACCATTTAACCTAGC	0.471429	0.528571	0.617915	0.914056	0.296141	-9.3	0.475581
main_Csnk1a1_chr18:61588081-61588151_12387	Mouse 3' UTR GCLiPP Peak	No	chr18:61588081-61588151	Csnk1a1	4	153	1.33329	208.355	AGATTCTCTTTAGGACTCTGCATTAACTCTATAATGTTCTTGCTATTAAAAAAAAGCATATTTGTCACGG	0.314286	0.685714	2.19255	2.193	0.000450704	-7.2	0.341365
main_Urm1_chr2:29843947-29844017_13945	Mouse 3' UTR GCLiPP Peak	No	chr2:29843947-29844017	Urm1	92	5437	0.88225	4899.36	GATTTGGGTGTGCAGCACCTAGTGGGCAGAAGGCTGTGTGTGTCCCTTTCCTCTATCTTCTGGAGACTTC	0.528571	0.471429	0.444408	0.613789	0.16938	-17.4	0.497382
main_Rpl13a_chr7:45125901-45125971_22747	Mouse 3' UTR GCLiPP Peak	No	chr7:45125901-45125971	Rpl13a	40	1943	1.04814	2080.09	TCAAGACCAACGGACTCCTGGTGTGAACCCAATAAAGACTGTTTGCCTCATGCCTGCCTGGCCTGCCCTT	0.542857	0.457143	1.46037	1.56924	0.108873	-10.9	0.554832
main_Clta_chr4:44032625-44032695_17327	Mouse 3' UTR GCLiPP Peak	No	chr4:44032625-44032695	Clta	15	590	2.08024	1253.59	AGCTGTTCACGTAATTGGATTAATTATGTTGAGTTCTTTTGGACCAAACCTTTTGTCTTTAGAGTTGATC	0.342857	0.657143	2.19387	2.19387	0	-8.8	0.447403
main_Ddx21_chr10:62582115-62582185_2093	Mouse 3' UTR GCLiPP Peak	No	chr10:62582115-62582185	Ddx21	6	149	1.4827	225.645	GATAAGAATTCATTGCATCGTTTTCCAACATACTTTTAGATTTACAAAGTAAAACCAACCATGGATCTGC	0.328571	0.671429	0.379127	0.772	0.392873	-4	0.367347
main_Ube2v1_chr2:167609048-167609118_15654	Mouse 3' UTR GCLiPP Peak	No	chr2:167609048-167609118	Ube2v1	57	2550	0.67118	1748.1	CAGTGTTACAGCAATTAGTCACCAAGGCCCCGGCCTCCCCTCCCCATCCAACCCAAGTCTTCATTTTCCA	0.542857	0.457143	1.31	1.39673	0.0867324	-4.6	0.580342
main_Gls_chr1:52186468-52186538_221	Mouse 3' UTR GCLiPP Peak	No	chr1:52186468-52186538	Gls	18	752	2.2827	1753.29	CTATCTTGGCAAAATGATACTAATGTTCTGCAGGATTTATTTACATGTCTTCCTTCGTGTATTTTGTTTT	0.314286	0.685714	0.936831	1.04556	0.108732	-9.1	0.571505
main_Celf1_chr2:91016289-91016359_14554	Mouse 3' UTR GCLiPP Peak	No	chr2:91016289-91016359	Celf1	72	3741	0.866354	3310.33	CATGTGTTAGGTGCTTTGCAGGAAATCCAAGCCTTAGGTTCCCCTCTGTCTCTGGCAGTTGGATGTTCTC	0.5	0.5	1.18051	1.64082	0.46031	-13.3	0.541641
main_Rplp0_chr5:115563426-115563496_19709	Mouse 3' UTR GCLiPP Peak	No	chr5:115563426-115563496	Rplp0	17	708	1.4753	1066.84	TTCGGTCTCTTCGACTAATCCCGCCAAAGCAACCAAGTCAGCCTGCTTAATTTGAGAAAGATGGAAATAA	0.428571	0.571429	1.14085	1.33645	0.195606	-8.5	0.61037
main_Sept11_chr5:93173375-93173445_19432	Mouse 3' UTR GCLiPP Peak	No	chr5:93173375-93173445	2019-09-11	59	3020	1.039	3204.86	ATTGCTTCTGCAACTTTTTCCTCCCACTGCTCCCGAGCCTCTGGTAGCTGGTTATTGCTGCTCTTTCTTT	0.485714	0.514286	1.0807	1.35039	0.26969	-11.6	0.405067
main_Ddx21_chr10:62582179-62582249_2094	Mouse 3' UTR GCLiPP Peak	No	chr10:62582179-62582249	Ddx21	10	445	1.55593	707.195	CCTTTCTTGCAGAGAGGCTTCTGAACTGTCCACTAACCATCACAAATTCTTCATTTTGAAAAAGGATAAG	0.385714	0.614286	0.176648	0.685831	0.509183	-8.64	0.381538
main_Ptp4a2_chr4:129849339-129849409_18067	Mouse 3' UTR GCLiPP Peak	No	chr4:129849339-129849409	Ptp4a2	4	119	0.903347	109.797	TGATGCAATTGTTTTGATTTTTAACTAAATGCAAATACCTTCCTGCCTCATCCCAGAAAATGAAAAATAA	0.3	0.7	0.846437	1.13151	0.28507	-5.2	0.457605
main_Crk_chr11:75704007-75704077_4462	Mouse 3' UTR GCLiPP Peak	No	chr11:75704007-75704077	Crk	13	707	1.81381	1309.78	CAAATCCTGAGGATTCTGAGAACACTACTAGAGGCATTTGTCTTCCTTGGATTTTTCTTGGATTCTTTCC	0.4	0.6	1.79632	1.82579	0.0294648	-15.2	0.493698
main_Fbxw8_chr5:118066969-118067039_19766	Mouse 3' UTR GCLiPP Peak	No	chr5:118066969-118067039	Fbxw8	26	860	0.124998	109.797	CTCCCTCTTGCTGGGCTGGCGCCCCCTGCTGGCCTGGTCTTGCTGTGTCCTCACTCGAGCATTCCCAGTC	0.657143	0.342857	0.0442254	0.392507	0.348282	-20.8	0.488165
main_Ccnd2_chr6:127128306-127128376_21847	Mouse 3' UTR GCLiPP Peak	No	chr6:127128306-127128376	Ccnd2	20	593	1.02915	623.335	TTCTTCCGTGCCTCTTCATTACCAGGTTTTCTTTCCTCCTCTGACCACATTCTTCAAAGAGAGTATTCTT	0.414286	0.585714	0.689479	1.01379	0.32431	-7.8	0.745263
main_Marcksl1_chr4:129515445-129515515_18012	Mouse 3' UTR GCLiPP Peak	No	chr4:129515445-129515515	Marcksl1	43	1734	0.758089	1342.63	GTTTCCCAAGTTAGGTTAGTGATGTGAGATGCCCTGTCCCTACCTCTTTCCCGAGCCCCATCCCTGCAGA	0.542857	0.457143	1.1123	1.30717	0.194873	-6	0.42898
main_Sep15_chr3:144596985-144597055_17005	Mouse 3' UTR GCLiPP Peak	No	chr3:144596985-144597055	2019-09-15	5	178	2.09233	380.398	GAATTATCACAGCACCTAGACAATAACTTAGTTTTGCATGCTTACATTGGTCATCCTTTTTATGTACATC	0.342857	0.657143	0.660014	0.821141	0.161127	-4.5	0.459997
main_Tmx1_chr12:70467162-70467232_6203	Mouse 3' UTR GCLiPP Peak	No	chr12:70467162-70467232	Tmx1	12	341	1.49679	521.319	GGGGTCTTGATGAATTTTATAATCAGGATATTGCTTTGTGTTTGAATATTGTAACACTATTGTGTTTTAA	0.285714	0.714286	0.32062	0.681718	0.361099	-13.3	0.496138
main_Ucp2_chr7:100499339-100499409_23179	Mouse 3' UTR GCLiPP Peak	No	chr7:100499339-100499409	Ucp2	59	1284	0.811505	1064.25	CACCTTTCTGAGCCTCTCCATGCTGACCTGGACCCTGCTTCCCAGCCCTGCCCTGTCTTTTTCTTCATCC	0.571429	0.428571	0.25007	0.73207	0.482	-7	0.480623
main_Rbpj_chr5:53654296-53654366_19221	Mouse 3' UTR GCLiPP Peak	No	chr5:53654296-53654366	Rbpj	57	3444	1.59605	5614.34	AATGCCTCTGCCTTGCCTGCAATACATGCAATGTGTGTTAACTGAGTCTGTTCTCAGAATCTGTTGGTAG	0.442857	0.557143	1.31854	1.43746	0.11893	-13.6	0.594858
main_Eif5_chr12:111545362-111545432_6661	Mouse 3' UTR GCLiPP Peak	No	chr12:111545362-111545432	Eif5	8	187	1.58425	302.59	TGTTTAGTGGTTGCTTTGTATTGAGAGAAAAGCTTTGAGGTGTGATTAAATCGTAAGCTCTGATTCTATT	0.342857	0.657143	0.655042	0.876873	0.221831	-7.2	0.407866
main_Tmem189_chr2:167643291-167643361_15657	Mouse 3' UTR GCLiPP Peak	No	chr2:167643291-167643361	Tmem189	1	12	3.52685	43.2271	GGATTTTTTTTAAAGGTGCTTGCTTGTCAATGTAAATAATAGAAAGCCTTAATATCTTTCTGTAACATGG	0.3	0.7	1.89082	2.04161	0.150789	-7.9	0.54003
main_Ubqln1_chr13:58177537-58177607_7346	Mouse 3' UTR GCLiPP Peak	No	chr13:58177537-58177607	Ubqln1	21	820	3.21132	2689.59	GGTGAACAAATTTTTGTCCTGCATCTGTCCAACTAACTTGCTTTTTAAACATAACCCTATGGTAGTAATT	0.342857	0.657143	2.08173	2.17339	0.091662	-3.5	0.520894
main_Nol11_chr11:107167472-107167542_5476	Mouse 3' UTR GCLiPP Peak	No	chr11:107167472-107167542	Nol11	13	313	0.849148	271.466	GTGCTGGAACTCTTCTGACAGTCTTGCTGGCTGTTCTGAACTGGATATATGGACCAGGCTGGCCGCGAAC	0.542857	0.457143	0.500113	0.848507	0.348394	-17	0.547633
main_Rtf1_chr2:119734056-119734126_14852	Mouse 3' UTR GCLiPP Peak	No	chr2:119734056-119734126	Rtf1	1	19	0.222748	4.32271	ATATATGTGGTGAGCATATATATATATTGTGCAGCTAGGGTGAAGCCAGCAAAGAGGTGTGTATGTTGTT	0.385714	0.614286	1.41349	1.4618	0.0483099	-15.4	0.670427
main_Atmin_chr8:116958549-116958619_24998	Mouse 3' UTR GCLiPP Peak	No	chr8:116958549-116958619	Atmin	67	2316	0.614	1452.43	AGTTTTGAGTCTCTTCTGTCCCTTCCCTGCTGAGCTGTGACTGCCGCCAGCTTCGTGTGCCATCCTTCTC	0.557143	0.442857	-0.0892394	0.543155	0.632394	-8.5	0.631819
main_Pmepa1_chr2:173227738-173227808_15749	Mouse 3' UTR GCLiPP Peak	No	chr2:173227738-173227808	Pmepa1	2	67	1.90766	130.546	GGCGCCTGTAGGCAAAACCGCAAAAAAAAAAGAAAGGAAAAAAAAACACTCCGCACTTCTTAAGAGAGAA	0.4	0.6	0.0619437	0.732648	0.670704	-5.8	0.520227
main_Ubb_chr11:62553079-62553149_4148	Mouse 3' UTR GCLiPP Peak	No	chr11:62553079-62553149	Ubb	32	975	0.790014	786.733	CCCAGTGGGCAGTGATGGCATTACTCTGCACTCTAGCCACTTGCCCCAATTTAAGTTTAGAAATTACAAG	0.457143	0.542857	0.879986	1.00514	0.125155	-13.7	0.532741
main_Nras_chr3:103065470-103065540_16673	Mouse 3' UTR GCLiPP Peak	No	chr3:103065470-103065540	Nras	126	6139	1.94907	12221.2	GAAACAGTCCATCCATATTTGCTCCCTGCCTATTATTCCTGCTTACAGACTTTTGCCTGATGCCTGCTGT	0.457143	0.542857	0.43493	0.620761	0.185831	-7.3	0.524941
main_Rnf4_chr5:34351427-34351497_19130	Mouse 3' UTR GCLiPP Peak	No	chr5:34351427-34351497	Rnf4	22	696	1.39371	990.765	GGCCTTTTCTGCATGGTATCTGCCTCCAGTTTCCTGAGCTCAAAAAGACTTTCAAAAATCAATGTCTGAT	0.414286	0.585714	0.346845	0.766366	0.419521	-7.4	0.611271
main_Idh3a_chr9:54603595-54603665_25772	Mouse 3' UTR GCLiPP Peak	No	chr9:54603595-54603665	Idh3a	4	96	3.10363	304.319	TATTTTGTAAACTGTAAGTGAACTGTATCATTTATCATTGTTAACCCATTTTACACTTCAGGCAAAATCA	0.285714	0.714286	0.612324	0.830521	0.218197	-8.1	0.398203
main_Celf1_chr2:91013625-91013695_14530	Mouse 3' UTR GCLiPP Peak	No	chr2:91013625-91013695	Celf1	3	318	1.38944	451.291	TTGTTTTGTTTTGTTTCTTTTTCCCTTTATTTAAAGTTTGCTGTGTTTGTAACCAGTTTGTTGAGAAGGA	0.3	0.7	1.35392	1.6189	0.264986	-8.4	0.617183
main_Hnrnpdl_chr5:100034539-100034609_19478	Mouse 3' UTR GCLiPP Peak	No	chr5:100034539-100034609	Hnrnpdl	29	1215	2.71489	3369.12	GGTTGTAGTATCCCCTGGTTTCTGTGGGTGTTACTGTGCTTACAGTCTAATGCTTAATTTCTCTGTTGAT	0.414286	0.585714	0.102394	0.703352	0.600958	-11.4	0.519455
main_March6_chr15:31458930-31459000_8554	Mouse 3' UTR GCLiPP Peak	No	chr15:31458930-31459000	2019-03-06	13	302	1.67327	516.132	GTCTTGAGATCTGTACATGTGTAAATAGGAGTTCCTTGATGCCCTAAAACCTTGGATTAAACAGAATGTG	0.385714	0.614286	1.16745	1.26404	0.0965915	-7.9	0.539985
main_U2af1_chr17:31647168-31647238_11047	Mouse 3' UTR GCLiPP Peak	No	chr17:31647168-31647238	U2af1	50	2159	1.06011	2337.72	AGACCGGGAGAGATCTGGACGATTCTGAGCCGAGCCCTTTTTACCGTGTGTCTGCTAGACAGTGTTGTAG	0.528571	0.471429	1.35641	1.63106	0.274648	-13	0.393137
main_Psma3_chr12:70994434-70994504_6212	Mouse 3' UTR GCLiPP Peak	No	chr12:70994434-70994504	Psma3	6	200	1.27813	261.092	GTTGCATATGGCTAGCACCATGGACTATATATACCCACTGACCGATTTTCATTAAATTTTGTCTTATAAA	0.342857	0.657143	0.993296	1.18428	0.190986	-7.6	0.479372
main_Tob2_chr15:81849590-81849660_9276	Mouse 3' UTR GCLiPP Peak	No	chr15:81849590-81849660	Tob2	32	1036	0.209977	222.187	AGGGCGGGAGGATACCCAAGCCTGATGCCTGAGAGGAGTCCCTAGACTTCAGCAACTCCGCTGCGTGGCC	0.628571	0.371429	0.351042	0.687831	0.336789	-21.3	0.673135
main_Caprin1_chr2:103766722-103766792_14733	Mouse 3' UTR GCLiPP Peak	No	chr2:103766722-103766792	Caprin1	10	265	1.81107	490.195	ACACAGGATTATGTTTAATCGCCAAAAACACACTGGCCAGTGTACCATAATATGTTACCAGAAGAGTTAT	0.371429	0.628571	2.37887	2.37887	0	-8.5	0.395101
main_Stom_chr2:35314867-35314937_14225	Mouse 3' UTR GCLiPP Peak	No	chr2:35314867-35314937	Stom	19	560	1.43593	821.315	AGAAGTGCTCTTTCTCACTTGTGCCTATTCTCATGGATCAGGTTTTTACATCATCTTGATTTTTAAAAAT	0.328571	0.671429	0.861915	0.940761	0.0788451	-9.5	0.66136
cd8_Utp11l_chr4:124678818-124678888_8671	Mouse 3' UTR GCLiPP Peak	No	chr4:124678818-124678888	Utp11l	6	234	0.74516	178.096	GCCTCAGCATTCTGTATCGAAAAGAATTATTATCTTTTCCTCCTGTCTTTTGTAATAACTTCAGATTTTA	0.314286	0.685714	-0.051169	0.782465	0.833634	-6.4	0.511663
main_Nxf1_chr19:8770804-8770874_12972	Mouse 3' UTR GCLiPP Peak	No	chr19:8770804-8770874	Nxf1	23	949	1.38339	1340.9	AAGCTTACTTTGTAGAGCTGACACTAAACTACCCGAAGGACTTAGGTGCTCTGTGTACTTAACCCCAGGA	0.457143	0.542857	1.44686	1.47069	0.023831	-15.7	0.388167
main_Prkar2a_chr9:108748486-108748556_26447	Mouse 3' UTR GCLiPP Peak	No	chr9:108748486-108748556	Prkar2a	19	887	1.06593	965.693	ACTACTACTATGAAGCAGGCAGCTAGCACTGGAAAACCCTCAAAGTGATCCCGAATTTTCCTAAGGTCCT	0.457143	0.542857	0.568394	0.838563	0.270169	-6.1	0.532022
main_Aagab_chr9:63640728-63640798_25970	Mouse 3' UTR GCLiPP Peak	No	chr9:63640728-63640798	Aagab	33	1722	0.773694	1360.79	CAAGAGCACAGCTCTGACCTAAGGTGAATGCTGGTGACAAGAAAGGCAGCTGTAGATGTAGGATGTGCCT	0.5	0.5	0.0152817	0.644606	0.629324	-14.8	0.647895
main_Csnk2a1_chr2:152279172-152279242_15158	Mouse 3' UTR GCLiPP Peak	No	chr2:152279172-152279242	Csnk2a1	5	186	2.63035	499.705	GAACACTTCAGAAGCACCGTGTCTGAACCGTTGCTTGTGGATTTAGTAGTTGAGTCATAAAAAAAAATTA	0.371429	0.628571	2.30872	2.30908	0.000366197	-13.2	0.520729
main_Unc119b_chr5:115124589-115124659_19658	Mouse 3' UTR GCLiPP Peak	No	chr5:115124589-115124659	Unc119b	74	3602	0.782525	2878.92	CAGAACGGTGTCTCTTGAGTTTAGTGTGCACCCTGTGCTTTGCTCTCTTCCTTCTCAGACTTCTTCGGGG	0.514286	0.485714	0.0540563	0.757437	0.70338	-10	0.615911
main_Sub1_chr15:11984171-11984241_8489	Mouse 3' UTR GCLiPP Peak	No	chr15:11984171-11984241	Sub1	8	234	2.83956	678.665	GATGACGCAGTAAGAAAGCTGTAAAATCTGAGCCATATCAAACCTGTACTGTTGTAGTTGTCTTTTTACA	0.371429	0.628571	1.75946	1.7871	0.0276338	-9.6	0.326343
main_Snx3_chr10:42534999-42535069_1900	Mouse 3' UTR GCLiPP Peak	No	chr10:42534999-42535069	Snx3	54	2321	0.596996	1415.26	TAGCCCCACAGCCCCGTAGAACCTGCAGTGTCCTGACTAAAGCTGCCGACTTGCTCTCATTTGCAGTTTC	0.542857	0.457143	0.931197	1.06061	0.129408	-9.5	0.459985
main_Mrps33_chr6:39802450-39802520_20811	Mouse 3' UTR GCLiPP Peak	No	chr6:39802450-39802520	Mrps33	15	966	0.54239	535.152	TGAGCAACGACGTCTAAAGAAGCTCCGTGGGAAGGGGAAACCGAGGAAAGGAGAAGGGAAGAGAGCTACA	0.528571	0.471429	1.26062	1.66087	0.400254	-9.9	0.406785
main_Ccdc115_chr1:34437174-34437244_74	Mouse 3' UTR GCLiPP Peak	No	chr1:34437174-34437244	Ccdc115	29	1052	1.00254	1077.22	TGCGGCAGCCATCTGGGATAGTGAAGCCCTGCAGAAATGGTGACAGAGAAGAAAGGGAGTCTAGAAACAT	0.5	0.5	-0.0577042	0.503451	0.561155	-10.4	0.523467
main_Brwd1_chr16:96068378-96068448_10582	Mouse 3' UTR GCLiPP Peak	No	chr16:96068378-96068448	Brwd1	15	532	1.36672	742.642	TTGTATTAGTAGCTTACATTGCAGTTGGGAAGCTGTGTAAACACCGTGGAAGGTTTGCAGTGCCATGGAC	0.457143	0.542857	1.36132	1.37363	0.0123099	-14	0.518037
main_Dnajb11_chr16:22871742-22871812_10145	Mouse 3' UTR GCLiPP Peak	No	chr16:22871742-22871812	Dnajb11	24	1111	1.43613	1629.66	GAGAACTGGACTTTGAAAGAGGTGGATCAGCGATATTTATTATCTGCAGTGGGTTTTTGTGTGTGTGTTT	0.4	0.6	1.61192	1.65907	0.0471549	-9	0.466195
main_Ncoa3_chr2:166070958-166071028_15588	Mouse 3' UTR GCLiPP Peak	No	chr2:166070958-166071028	Ncoa3	19	607	2.06242	1278.66	GTCAGAAGCGAGCAGTGCTTCTGTGGACACACTTCCTTCCCTTTGTAAATAGGATCTTTAAGATATTGTA	0.414286	0.585714	1.70634	1.92223	0.215887	-14	0.446149
rapidmain_Sf3a2_chr10:80804807-80804877_2488	Mouse 3' UTR GCLiPP Peak	Yes	chr10:80804807-80804877	Sf3a2	43	1286	0.960312	1261.37	CAACTGAGCAGTCCCCCCACCAGCCTCTGTTGTCTGTGTGGTCTTTTCCCATTGCCAGTCCTTGGAAGGT	0.557143	0.442857	-0.316718	1.01759	1.33431	-15.3	0.461057
main_Crebzf_chr7:90444394-90444464_23100	Mouse 3' UTR GCLiPP Peak	No	chr7:90444394-90444464	Crebzf	101	5017	0.887947	4550.08	CCCGTAACGCTCATGCTCGGCTGCTTAGGCTACTTTAATGGGCAGACATCTCAATGTGTGTGTGTGTGTG	0.514286	0.485714	1.9849	2.07383	0.0889296	-15.3	0.558985
main_Srprb_chr9:103189920-103189990_26276	Mouse 3' UTR GCLiPP Peak	No	chr9:103189920-103189990	Srprb	28	1840	1.11142	2088.73	TGTAGCATCATGTTAGTGTGAGACATAACAGAGAGGGCATCGCTTTGAGAGTAGGGTCGCATCTGAGAAG	0.471429	0.528571	-0.0550282	0.497873	0.552901	-13	0.423987
main_Eif4e_chr3:138555530-138555600_16965	Mouse 3' UTR GCLiPP Peak	No	chr3:138555530-138555600	Eif4e	25	1192	0.557431	678.665	GGAGACTGCGTCACGCAATCGAGATTGGGAGCTGAACCAAAGCCTCATCAAAGCAGAGTGGACTGCACTG	0.542857	0.457143	2.45746	2.45746	0	-16.6	0.546915
main_Rcc2_chr4:140723085-140723155_18480	Mouse 3' UTR GCLiPP Peak	No	chr4:140723085-140723155	Rcc2	113	6471	1.44671	9561.83	GGAAGGGAGTTAACGAGGATGGTGGGATTCGGTTGAAGGTGCCTGGTTTAGTGCTGTTAATTGTCTTATT	0.457143	0.542857	1.17286	1.45438	0.281521	-14.9	0.525408
main_Ube2i_chr17:25261956-25262026_10788	Mouse 3' UTR GCLiPP Peak	No	chr17:25261956-25262026	Ube2i	111	5706	1.06614	6213.46	TGAGCCTCAGATCCAAAGTTGGCCAGCATTTCCATCCTGCACCACTTCCTTTGTGTTTATATGGCGTTTC	0.471429	0.528571	0.787028	1.10342	0.316394	-10.9	0.462292
main_Fkbp1a_chr2:151560720-151560790_15134	Mouse 3' UTR GCLiPP Peak	No	chr2:151560720-151560790	Fkbp1a	84	3445	0.921382	3242.03	CTGAATGTGTTCCGTCACTCAGCTTTGCTTCGGACACCTCCATGTCCTCTTCCCCCCTCTGTATGTGTGT	0.528571	0.471429	1.01283	1.11151	0.0986761	-10.3	0.470182
rapidcd8_Map1lc3b_chr8:121597781-121597851_12393	Mouse 3' UTR GCLiPP Peak	Yes	chr8:121597781-121597851	Map1lc3b	55	1744	0.671719	1196.53	ACCTCCCACCTAGCTCCCCACAGGCACCCACCTTCCCTGCATGCAGCTGTCTTTGCTAACCCTCAATGTT	0.571429	0.428571	-0.214324	0.940239	1.15456	-8	0.549931
main_Dnaja1_chr4:40732960-40733030_17223	Mouse 3' UTR GCLiPP Peak	No	chr4:40732960-40733030	Dnaja1	17	582	1.67253	994.223	TTTGACATTCTGTATGCAGTAGTGAATGTGGGAAGGACTGTAATCATAATAAGCTCACTACTTGGCTATT	0.371429	0.628571	1.263	1.30942	0.0464225	-10.8	0.47053
main_Dnal4_chr15:79761502-79761572_9143	Mouse 3' UTR GCLiPP Peak	No	chr15:79761502-79761572	Dnal4	5	253	1.30814	338.036	TCTAGATTCTTTTTGAGTGTGGGAAGAAGGGTTTTAGTAGAAGGGTGAATCATATTTTACACAGCGGTCT	0.385714	0.614286	1.73242	1.8367	0.104282	-9.7	0.532907
rapidmain_Pttg1ip_chr10:77597416-77597486_2197	Mouse 3' UTR GCLiPP Peak	Yes	chr10:77597416-77597486	Pttg1ip	53	2178	1.08468	2412.94	TTACTTTGTTAAGGCAAGAACTGACCACCACCCTTGCTTCCTGAAGGCTGTGTTTTGTCTGTAGGCCCAC	0.485714	0.514286	-0.373577	0.685775	1.05935	-13.7	0.564738
main_Rdx_chr9:52086790-52086860_25759	Mouse 3' UTR GCLiPP Peak	No	chr9:52086790-52086860	Rdx	49	3012	1.80108	5540.85	TGTGTGTATGTGCTTTGAGCACTGTGTACATCTTAGGATAATGGTGGACATTTCAGTGCATGTTTAGCTA	0.4	0.6	0.90669	0.973845	0.0671549	-14.8	0.507739
main_Actb_chr5:142903335-142903405_20388	Mouse 3' UTR GCLiPP Peak	No	chr5:142903335-142903405	Actb	16	394	0.663835	267.143	AGGAGGATGGTCGCGTCCATGCCCTGAGTCCACCCCGGGGAAGGTGACAGCATTGCTTCTGTGTAAATTA	0.557143	0.442857	0.747549	1.09408	0.346535	-17.2	0.494317
main_Glo1_chr17:30593557-30593627_11027	Mouse 3' UTR GCLiPP Peak	No	chr17:30593557-30593627	Glo1	7	458	1.04419	488.466	GAAGGTACTCCTGAGAGCAATTCGGAATCATGCTGACAAGGACACAGATAGAAATACTAATTTTCTTTTT	0.371429	0.628571	0.596014	0.79162	0.195606	-8.9	0.464937
main_Strn4_chr7:16840749-16840819_22291	Mouse 3' UTR GCLiPP Peak	No	chr7:16840749-16840819	Strn4	42	1518	2.2109	3427.91	CTGTGTGATAGTCTGTCAGTCTCCTCCTTGCTCCACACTTTGGCCTCTATTTATTTCACTCTTTATTTGG	0.428571	0.571429	1.09732	1.24087	0.143549	-5.3	0.491091
main_Arf3_chr15:98738150-98738220_9583	Mouse 3' UTR GCLiPP Peak	No	chr15:98738150-98738220	Arf3	108	6862	1.4637	10258.7	TTGCTTTGAGATTGGTGAGGACTTTGCCTTTTGCTCTGCCACACTTTCTGACCTTCCTGCTTAGATGCTA	0.457143	0.542857	0.591859	0.775775	0.183915	-10.8	0.430428
main_Colgalt1_chr8:71623947-71624017_24334	Mouse 3' UTR GCLiPP Peak	No	chr8:71623947-71624017	Colgalt1	41	2446	0.729824	1823.32	CTGACCACCAAGAGATTGGTCAGGAACAAGCACAGTCAGTTGGGTCCACCATGAAGGAAGTTCTCTTGTT	0.485714	0.514286	-0.109127	0.601155	0.710282	-16.1	0.516717
main_Usf2_chr7:30946505-30946575_22646	Mouse 3' UTR GCLiPP Peak	No	chr7:30946505-30946575	Usf2	2	76	0.0556871	4.32271	CGCCGGCTCACCCTTCAGCTGCTGTCGGCCTCTGCTGCCCCTCCCCCAGCCCTTAGCACAGAGAGGGAGA	0.685714	0.314286	0.946394	1.34699	0.400592	-18.3	0.586932
main_Larp1_chr11:58059893-58059963_3973	Mouse 3' UTR GCLiPP Peak	No	chr11:58059893-58059963	Larp1	51	2058	0.122154	256.769	TGTTGCCACTGTCCTTGTTGTGCTTGCTGTCGCCTCTCCAGGCCCACTCAGCTCTGCTCCGCCCCGCCCC	0.657143	0.342857	0.847577	1.02732	0.179746	-11.2	0.468736
main_Clns1a_chr7:97718244-97718314_23112	Mouse 3' UTR GCLiPP Peak	No	chr7:97718244-97718314	Clns1a	25	1224	1.02348	1279.52	CGTGGTGCCTCTTCACTCCAGAATGGGGCTGGTGAAAGGCATTTTTCTTCTCCAAAACTCATTTCTCAAG	0.471429	0.528571	0.878732	0.943296	0.0645634	-15.2	0.568717
main_Gmfb_chr14:46809511-46809581_7943	Mouse 3' UTR GCLiPP Peak	No	chr14:46809511-46809581	Gmfb	2	44	4.34764	195.386	AGCTAAAATTTACAGTATTTTTCTTATTCTTTTTCTGCTGTTCCGTAAAGAGTATGTCCAGATTTCATAA	0.285714	0.714286	0.616521	0.77593	0.159408	-4	0.552218
main_Tmem38b_chr4:53860714-53860784_17388	Mouse 3' UTR GCLiPP Peak	No	chr4:53860714-53860784	Tmem38b	10	289	0.661925	195.386	GGGCCTGGTTAGTACTTGGATGGGAGACCGCCTGGGAATACCGGGTGCTGTAGGCTTGAAAAAAAAAACC	0.528571	0.471429	0.070662	0.491225	0.420563	-21.3	0.72773
main_Praf2_chrX:7730407-7730477_26725	Mouse 3' UTR GCLiPP Peak	No	chrX:7730407-7730477	Praf2	27	1047	0.447071	478.092	GACCTTGGCATCTACACCCTGGACGTAGAGGACCCCCACCCCATACCCAAGACCAACCCTTTTCCTAGCC	0.585714	0.414286	0.364915	0.673479	0.308563	-8.1	0.529243
main_Rab35_chr5:115646345-115646415_19719	Mouse 3' UTR GCLiPP Peak	No	chr5:115646345-115646415	Rab35	30	1554	1.19504	1896.81	CAACAGGTTTCTCATTCTGCCTTCTAGATGCCTCTGCTACAGACCCAGGAGAGCCATGGCTTCTCACTTA	0.5	0.5	0.410113	0.680366	0.270254	-11.1	0.46935
main_Dcaf7_chr11:106056201-106056271_5428	Mouse 3' UTR GCLiPP Peak	No	chr11:106056201-106056271	Dcaf7	26	1337	1.23136	1681.53	CCCGGCAGTTTGGAACATGGTCTAGGAGAGGGTGGCTGTTTATAATCTGCTGAGCTGCTTGCAGGTTTCT	0.514286	0.485714	-0.10131	0.613141	0.714451	-14.6	0.482144
main_Tmed7_chr18:46587246-46587316_12277	Mouse 3' UTR GCLiPP Peak	No	chr18:46587246-46587316	Tmed7	13	347	0.834247	295.673	AACCCAGCAGTTGCTTTTCAGCTGTGCCACTCTTCACCACAGGTAACAAGAGCTATAAATGAGTCTCCGG	0.485714	0.514286	0.162141	0.853099	0.690958	-11.7	0.510233
main_Glg1_chr8:111156210-111156280_24929	Mouse 3' UTR GCLiPP Peak	No	chr8:111156210-111156280	Glg1	100	5474	0.710833	3974.3	TGTGTCTTCCTGAGATGCGTTCTGTGCAGGCTCTGTCAGTTGCTCCAAATCACTCTGTGTCTCACCTGAC	0.514286	0.485714	0.428028	1.05352	0.625493	-12.8	0.547337
main_Eif1a_chr18:46608888-46608958_12284	Mouse 3' UTR GCLiPP Peak	No	chr18:46608888-46608958	Eif1a	4	71	2.67047	193.657	TTGCATTGCATAGAGAAGTTTTCCAACAAAGCAGCTGTTAATAACACATAAAATATGTTTTACTTTGCAA	0.3	0.7	-0.0815915	0.528662	0.610254	-6.3	0.371821
main_Agps_chr2:75926489-75926559_14439	Mouse 3' UTR GCLiPP Peak	No	chr2:75926489-75926559	Agps	33	2437	1.07394	2673.16	CTTTCCTGTGAGTAGGTCATTGGGGAGGACACTCAAGACAGAGCTGGTAGTCTGTTACTAGCATGCCTTC	0.5	0.5	0.425972	0.762366	0.336394	-20.2	0.494862
main_Tapbp_chr17:33928202-33928272_11128	Mouse 3' UTR GCLiPP Peak	No	chr17:33928202-33928272	Tapbp	14	523	0.966208	516.132	GTAGCCCCTGCCCCAGAACAACAGCCTTCTTCTCTTCTTCTCCCTCCATTGAATAGCTCGGATTTTTTTT	0.471429	0.528571	0.133465	0.515352	0.381887	-2	0.77426
main_Slc6a6_chr6:91756487-91756557_21412	Mouse 3' UTR GCLiPP Peak	No	chr6:91756487-91756557	Slc6a6	53	1592	0.477985	777.223	TGAACCAGGAGAGGGCACTACACCTTCACCCCAGCCTCCACTGGGCCCAACTGTGCCATCCTGAACTTCT	0.585714	0.414286	0.306803	0.626437	0.319634	-21	0.65041
main_Agps_chr2:75928583-75928653_14442	Mouse 3' UTR GCLiPP Peak	No	chr2:75928583-75928653	Agps	21	1123	1.29115	1480.96	TATGGTCCTTGAGCATCTCCGTTAGCTGAATTGTGGAGACCACATGTTTCTTGTGTCCAACATTTTATTA	0.4	0.6	0.512521	0.611732	0.0992113	-10.3	0.380116
main_Ly6e_chr15:74958959-74959029_8856	Mouse 3' UTR GCLiPP Peak	No	chr15:74958959-74959029	Ly6e	36	2435	0.650736	1618.42	CCTTGGAGTCTCAAGAGTACCAGAGTCAGCGCCGAATCTTGTGGACACACTGACAAGGATGTCTAATCCA	0.5	0.5	-0.135507	0.698042	0.833549	-14.3	0.535727
main_Txn2_chr15:77915421-77915491_8979	Mouse 3' UTR GCLiPP Peak	No	chr15:77915421-77915491	Txn2	127	3630	0.642411	2381.81	CTGTGTGCTCCTCTTGTGCACCTACTGTGTGCTTCTTCCGGGGCTTGTTGCCATTCCCCTAGATGCTGGA	0.557143	0.442857	-0.0322535	0.755014	0.787268	-17.8	0.454289
main_Uqcrfs1_chr13:30540622-30540692_6971	Mouse 3' UTR GCLiPP Peak	No	chr13:30540622-30540692	Uqcrfs1	2	48	2.29245	112.39	GGTCCCCTCAGAAGAGTGGAGAGTAAGCCTTGTGTACGTCTAGGTTGGTTGATTTAAAATATTTAAGAAT	0.4	0.6	0.393535	0.575901	0.182366	-9.5	0.561822
main_Slc6a6_chr6:91756639-91756709_21414	Mouse 3' UTR GCLiPP Peak	No	chr6:91756639-91756709	Slc6a6	132	7835	2.14771	17187.1	GACTCAGCCACCCATGATTGTACTGTGTTCCTGTTGTCCTGTGTATTTCTGGTTGCTCTCGTGTTATTTT	0.442857	0.557143	-0.0831268	0.60338	0.686507	-7.1	0.634392
main_Kras_chr6:145220525-145220595_22078	Mouse 3' UTR GCLiPP Peak	No	chr6:145220525-145220595	Kras	4	104	1.92891	204.896	CTTTCTTAAGGCACACTTAAGTAAAAGTGTGATTTTTGTACATTACACTAAATTATTAGCATTTGTTTTA	0.257143	0.742857	2.37704	2.37704	0	-12.1	0.484429
main_Sat1_chrX:155213331-155213401_27267	Mouse 3' UTR GCLiPP Peak	No	chrX:155213331-155213401	Sat1	35	1673	1.39134	2377.49	CGAGCACCCATTCCAAAGCTTTATTACCAGTGACGTTGTTGCATGTTTGAAATTCGGTCTGTTTAAAGTG	0.414286	0.585714	1.96661	2.00908	0.0424789	-6.5	0.505009
main_Sumo3_chr10:77616384-77616454_2206	Mouse 3' UTR GCLiPP Peak	No	chr10:77616384-77616454	Sumo3	46	2204	1.12449	2531.38	ACATAACATGGCCACTAGGAGGGTTTGGTTTGGGGGAAATGAGGTGTGAGGCTTTGGGGTTTGTTTTTGT	0.471429	0.528571	0.0994648	0.665183	0.565718	-9.9	0.537462
main_Eif3j2_chr2:122052244-122052314_14910	Mouse 3' UTR GCLiPP Peak	No	chr2:122052244-122052314	Eif3j2	11	666	1.60646	1092.78	AATGTGCAAATGAGGGAACTTGGATCTTGTTGCCAAGGGGTTAAAATTGGGAACCTCAGTTGCTACTAAA	0.414286	0.585714	1.97032	2.00334	0.0330141	-15.7	0.552997
main_Eif4e_chr3:138555957-138556027_16970	Mouse 3' UTR GCLiPP Peak	No	chr3:138555957-138556027	Eif4e	76	3142	2.10991	6771.09	TCACAGCATTGTCCTTGCTGTCCTCTTGCTGATGGCTGCTAGATTTAATTTATTTGCTTCCCTCCTTGAT	0.428571	0.571429	2.02065	2.04403	0.0233803	-11.8	0.58813
main_Cdv3_chr9:103354957-103355027_26297	Mouse 3' UTR GCLiPP Peak	No	chr9:103354957-103355027	Cdv3	31	1217	1.43276	1780.96	ATGGAAGTTCAAGAGTCACGACTGATCTTGATGTGTGTTGGATTTAGGGGTGTTTCATTGTCTTAAATAT	0.371429	0.628571	0.624521	0.947169	0.322648	-10.6	0.598097
main_Mat2a_chr6:72433939-72434009_21081	Mouse 3' UTR GCLiPP Peak	No	chr6:72433939-72434009	Mat2a	10	461	1.01904	479.821	AATCGAACCTTTGTGCCCTATCACCTAATCCTCCAAAGTCCTAATTGCAATTACTTTCCCACCAGATGCT	0.428571	0.571429	1.72908	1.75677	0.0276901	-0.8	0.478129
cd8_Arf6_chr12:69374094-69374164_3031	Mouse 3' UTR GCLiPP Peak	No	chr12:69374094-69374164	Arf6	13	387	2.05377	811.805	CCACTGCAAAGTTAGCAACTTCGCTGTTTCCCTCTTCTTACCTTTAAAAATACTCTTTCCAGAAAATGGA	0.385714	0.614286	0.950648	1.06986	0.119211	-7.3	0.675451
main_Rab10_chr12:3249709-3249779_5954	Mouse 3' UTR GCLiPP Peak	No	chr12:3249709-3249779	Rab10	13	369	0.940493	354.462	CCTGTCCATCTGCTGCCATCCACCATCCGGTTCTCTTCTTGCTGCAAAATAAAACACTCTGTCCATTTTT	0.457143	0.542857	1.67924	1.72775	0.048507	-4.4	0.566214
main_Coa5_chr1:37420010-37420080_164	Mouse 3' UTR GCLiPP Peak	No	chr1:37420010-37420080	Coa5	50	2918	0.879512	2621.29	GTCATATGCTTGGTGATCTTGGCTAGATCCTGGTCGCATGTACTGTGCTGACACCATGCACAATCACATA	0.471429	0.528571	-0.0515775	0.671268	0.722845	-18.2	0.560012
main_Nras_chr3:103066132-103066202_16678	Mouse 3' UTR GCLiPP Peak	No	chr3:103066132-103066202	Nras	66	3060	1.03399	3231.66	AAGTGCTGGGATTACAGGCACATTCCACCACACACACCTGACTGAGCTCGTTCCTAATGAGTTTTCATTA	0.457143	0.542857	0.107254	0.462437	0.355183	-15.3	0.448384
main_Gna13_chr11:109396913-109396983_5491	Mouse 3' UTR GCLiPP Peak	No	chr11:109396913-109396983	Gna13	14	548	0.569959	319.016	CTGGTCTGGAAGGGCTGTTAGAGAAAAGTTTTAGGGAGGAGTCTCGGCCCACAGAGGCTTGGCCCCCTAC	0.571429	0.428571	0.0280282	0.590592	0.562563	-20.5	0.654786
main_Arf6_chr12:69374306-69374376_6197	Mouse 3' UTR GCLiPP Peak	No	chr12:69374306-69374376	Arf6	1	23	0.662434	15.5618	ACATTTAAAAAGTCAAATTATATGCCCCTTTAACGTAGCTGGAAAGAAAATACACATTCCTGTTTTCACG	0.328571	0.671429	1.01048	1.03558	0.0250986	-4.6	0.577073
main_Cbfb_chr8:105216817-105216887_24706	Mouse 3' UTR GCLiPP Peak	No	chr8:105216817-105216887	Cbfb	1	75	4.53694	347.546	CACAGGTAAATTGTGTTAAAATAATGTTTAAGATAGCTGCTTTCATGTGTATTTTGTATTTTGTATTGCA	0.271429	0.728571	1.63224	1.65725	0.0250141	-7.9	0.492131
main_Dpm2_chr2:32573277-32573347_14150	Mouse 3' UTR GCLiPP Peak	No	chr2:32573277-32573347	Dpm2	128	5952	0.480675	2922.15	TCACAGTCAAAGCTCCCTGTCCCTTCCACCGAGTTCTCTCCTCTCACCTCTGTGCTCCTCCCACTGTGCT	0.571429	0.428571	0.153324	0.478479	0.325155	-7.6	0.431777
main_Limd1_chr9:123521364-123521434_26692	Mouse 3' UTR GCLiPP Peak	No	chr9:123521364-123521434	Limd1	2	54	2.38258	131.41	AAGATTGCAGTGGAATTAGTGTCTGAGGTAGATGGGATTTGTTTGCAAATTGAATAATTTAAAACTCTGT	0.328571	0.671429	0.168648	0.622676	0.454028	-9.1	0.620473
rapidmain_Ptp4a3_chr15:73756962-73757032_8847	Mouse 3' UTR GCLiPP Peak	Yes	chr15:73756962-73757032	Ptp4a3	39	1683	0.317856	546.391	ACGGCTATGTGCGTCCCTGCTCTGTCCCCATCTGTACCCACGGCTGTCTTTCTGAAGCTGTCCCTGGACC	0.6	0.4	-0.714972	0.872746	1.58772	-10.8	0.491825
main_Mlec_chr5:115147340-115147410_19681	Mouse 3' UTR GCLiPP Peak	No	chr5:115147340-115147410	Mlec	14	658	0.589166	395.96	CCAAGTGTGTGTGTGGAGGTAGATAAGTGGGACGGTAAAGACAAAGGCGTGGAAGAGAAAGTCAGCGCTT	0.5	0.5	0.16069	0.573085	0.412394	-10.5	0.509919
main_Rab14_chr2:35182136-35182206_14218	Mouse 3' UTR GCLiPP Peak	No	chr2:35182136-35182206	Rab14	1	30	2.03146	62.247	TACTGCCTCCTTGTCTTCTGTACATCTTACTGGGTTTTATTAAAAAAAGAAAAAAGAAAAAACAACTCTT	0.3	0.7	1.80161	1.86811	0.066507	-2.5	0.505187
main_Glud1_chr14:34344232-34344302_7867	Mouse 3' UTR GCLiPP Peak	No	chr14:34344232-34344302	Glud1	18	663	2.09121	1416.12	AAACCAGTACATGCTGCTGTAATAAATTGCCTTCAACCACTTAAGCCTAACCTTTACTCAAGCAGTGAAC	0.4	0.6	1.49935	1.5409	0.0415493	-7.2	0.466096
main_Tmem127_chr2:127258643-127258713_14965	Mouse 3' UTR GCLiPP Peak	No	chr2:127258643-127258713	Tmem127	59	2539	1.31184	3401.97	TGAGAGGCCTGCAGCATGGATCCAGGTAGGCAAGCTGTTCTTGTTCCGTTATGAGCATCTCTGGAGTAAT	0.5	0.5	0.110859	0.511789	0.40093	-15.4	0.707518
main_Api5_chr2:94413571-94413641_14665	Mouse 3' UTR GCLiPP Peak	No	chr2:94413571-94413641	Api5	48	2003	1.67429	3425.32	GATTGCCGGGGATGTCCCTTTAAAAGGACTGCTGCCTTCAGCTGAAAATGTAATGTTCTTTCTACCTTTG	0.442857	0.557143	2.28255	2.30956	0.0270141	-10.5	0.512694
main_Mrfap1_chr5:36795869-36795939_19173	Mouse 3' UTR GCLiPP Peak	No	chr5:36795869-36795939	Mrfap1	24	1102	0.861037	969.152	CAGCCAATGGATTCTGGTTGAGTGATGGCGATTGGCTGACATGACACCCTGGAGAAGCTGAAACCAGAGA	0.514286	0.485714	0.703169	0.871056	0.167887	-17.3	0.525953
main_Higd2a_chr13:54590877-54590947_7236	Mouse 3' UTR GCLiPP Peak	No	chr13:54590877-54590947	Higd2a	14	787	0.674358	542.068	GTCTCAAGCCTGAGTATAGCCGGGTCTTAAAGCGCCATGGAAACCATTACAAAACCCAGGAACAACAGAC	0.485714	0.514286	0.256944	0.648549	0.391606	-9.9	0.479268
main_Mlec_chr5:115147241-115147311_19680	Mouse 3' UTR GCLiPP Peak	No	chr5:115147241-115147311	Mlec	36	1765	2.20891	3982.08	ATCTGTTGATGTATCTTCATTGTCATCTCTCATCCTGATGTGTGCCAGTTAGAGGACTGTCTGGTATCCA	0.428571	0.571429	0.761775	0.977127	0.215352	-12.5	0.449005
main_Sypl_chr12:32976551-32976621_6078	Mouse 3' UTR GCLiPP Peak	No	chr12:32976551-32976621	Sypl	1	28	1.14874	32.8526	AAATGTTTAACATTTAGTCAATGATGTTTCTTCTCCTGAGTTTAACATTGATATTGTGAAAATAAATGCA	0.257143	0.742857	1.15592	1.30851	0.152592	-8.2	0.446119
main_Sec62_chr3:30819007-30819077_15943	Mouse 3' UTR GCLiPP Peak	No	chr3:30819007-30819077	Sec62	33	1106	1.47401	1665.11	TTTCTGTGTTGGCCGATCATCATGATGTACAGATGGCATTTGTAGCATTCTTTAAATCCATTTTCTGAAA	0.357143	0.642857	1.05	1.18552	0.135521	-8	0.46587
main_Dhrs1_chr14:55739108-55739178_8077	Mouse 3' UTR GCLiPP Peak	No	chr14:55739108-55739178	Dhrs1	64	2723	0.761892	2118.99	CTCACCATGAAGAGAAGGTGGCTGCAGGAAGTCTAGTGCATTCTGGGGGCTCTGGTAGGTTCTTTGTGCC	0.542857	0.457143	0.228901	0.701887	0.472986	-17.5	0.589032
main_Pak2_chr16:32019751-32019821_10231	Mouse 3' UTR GCLiPP Peak	No	chr16:32019751-32019821	Pak2	42	2382	1.29241	3144.34	TTCATCTGCTGATCTTCTCTCCTTCGTGACCTTCCCTTCCTCTAACCCTTTCCTTTTAAGTTGTCGTTCG	0.457143	0.542857	0.808056	0.913099	0.105042	-0.1	0.646749
main_Sat1_chrX:155213455-155213525_27269	Mouse 3' UTR GCLiPP Peak	No	chrX:155213455-155213525	Sat1	50	2606	0.9192	2446.65	ACTTGCTAAAAATGGCAGCAGAGGAGTGAGGCGTGCCGGTGTAGACAATGACAACCTCCATTGTGCTTTA	0.485714	0.514286	1.51555	1.60713	0.0915775	-14.2	0.500011
rapidmain_Pmepa1_chr2:173226867-173226937_15747	Mouse 3' UTR GCLiPP Peak	Yes	chr2:173226867-173226937	Pmepa1	12	408	0.195014	81.267	TGTGTCGTCCCTCTGGGTTACAGCTGAGTCAGGACCGTCTCCCCCGCACCGCCCCCCAACAGAGGCATCC	0.657143	0.342857	-0.352549	0.739028	1.09158	-12.7	0.553418
main_2810417H13Rik_chr9:65902127-65902197_26022	Mouse 3' UTR GCLiPP Peak	No	chr9:65902127-65902197	2810417H13Rik	17	492	1.87525	942.351	ATCTCTTGTCATTTATCAGAATGGGTTGGGGAGGCAAAGATAAAATGCTGAAAAGCTAGTTGTGTATCTT	0.371429	0.628571	-0.0693521	0.631211	0.700563	-13.2	0.570214
main_Arl1_chr10:88743494-88743564_2692	Mouse 3' UTR GCLiPP Peak	No	chr10:88743494-88743564	Arl1	11	327	2.56263	855.897	TAATCTTCATTTGCTTAACTGACTAGTTTATTTTGTTGGCTCACTTTACTGACTTATGTTATTTTACAGT	0.285714	0.714286	0.414014	0.709225	0.295211	-3.7	0.544266
main_Khsrp_chr17:57021554-57021624_11656	Mouse 3' UTR GCLiPP Peak	No	chr17:57021554-57021624	Khsrp	1	16	0.58193	9.50996	CCAGCCTTAGAAAATAGCAAGAATTTAACCTCTGCCCCGCCCCCCAAAAAAGTTTAAAAATTAAATCACA	0.385714	0.614286	0.432761	0.859099	0.426338	-2.2	0.469384
main_Vamp3_chr4:151047721-151047791_18706	Mouse 3' UTR GCLiPP Peak	No	chr4:151047721-151047791	Vamp3	32	2227	1.82097	4142.02	ATGGCAGTGCCACTAGAATGTCCTGAAATCTGTGTTTGTGTGTAAAGCAGCATTACTCAAGATGTCATAG	0.414286	0.585714	-0.00129577	0.450113	0.451408	-12.9	0.511132
main_Pak2_chr16:32020127-32020197_10235	Mouse 3' UTR GCLiPP Peak	No	chr16:32020127-32020197	Pak2	8	179	2.72848	498.841	ATGAAGAGTAACCGCTAACATCGTCACCGAGGCCTCCTATTCCCTTATCCATTTTTTAAAAGAAGTCTTT	0.4	0.6	1.32337	1.5048	0.181437	-4.4	0.52734
main_Cds2_chr2:132305287-132305357_15049	Mouse 3' UTR GCLiPP Peak	No	chr2:132305287-132305357	Cds2	4	349	0.0169774	6.05179	TCCACCTGGGGCCCAGAGAGCTGGAGCAGGATGGAGTGGGGGCCAGTCGCCAAGGCCGCCCAGCTGCTGT	0.7	0.3	0.379141	0.81607	0.43693	-28.6	0.560778
main_Rpain_chr11:70977670-70977740_4334	Mouse 3' UTR GCLiPP Peak	No	chr11:70977670-70977740	Rpain	54	2398	1.23084	3014.66	GGGCTGTGATCCTCTAGCCATCCCGACCTCACACTTCACTACTGAGCTGAGAACAACTCATTTCCTGAGA	0.514286	0.485714	-0.0670704	0.812225	0.879296	-12.4	0.435514
main_Uhrf1_chr17:56322647-56322717_11599	Mouse 3' UTR GCLiPP Peak	No	chr17:56322647-56322717	Uhrf1	29	1133	2.13665	2472.59	CCAGTTGGACTTCTGTTTTTCATCCCTCCACCCCCTTTCTATAACAAAGCCTGCGATTTATTGTCCAAGA	0.442857	0.557143	0.246042	0.770606	0.524563	-5.01	0.455671
main_Mgat2_chr12:69186500-69186570_6184	Mouse 3' UTR GCLiPP Peak	No	chr12:69186500-69186570	Mgat2	12	423	2.97756	1286.44	AGAGTCATTTTCAGTATTACTGATTCCTGTGCTATTGTGTTAAGATTTGCCTGTGCTTTCAACATACATA	0.342857	0.657143	1.55196	1.67179	0.119831	-7.4	0.481692
main_Slc6a6_chr6:91755076-91755146_21404	Mouse 3' UTR GCLiPP Peak	No	chr6:91755076-91755146	Slc6a6	23	747	1.68495	1285.57	GCGCCGCTTTCCTGCTGTTTACTAACGTTAGATTCTCATAGGACCAGGTTTACAGAGCTTTATATTTGTA	0.414286	0.585714	1.77215	1.83294	0.0607887	-10.8	0.689855
main_Pak2_chr16:32018739-32018809_10224	Mouse 3' UTR GCLiPP Peak	No	chr16:32018739-32018809	Pak2	135	7220	1.09323	8061.85	GGTCTGTGACCTGTAGTAGTAGCTGTTAGCTGCCCTCTCCCCACTCCTGCCTTTCCTCTTCTCTGCTTCT	0.542857	0.457143	0.473493	0.928113	0.45462	-9.9	0.505469
main_Bcl10_chr3:145933578-145933648_17021	Mouse 3' UTR GCLiPP Peak	No	chr3:145933578-145933648	Bcl10	8	302	0.767965	236.885	CGGAATATTTCTCAATTTGAGAAAACAACTTGTGGATTGGGAATAATGTTTTTAGCACATTTATGCTACA	0.314286	0.685714	0.273634	0.550282	0.276648	-13.8	0.536217
main_Ydjc_chr16:17148705-17148775_10030	Mouse 3' UTR GCLiPP Peak	No	chr16:17148705-17148775	Ydjc	47	2388	0.580246	1415.26	CTGCAGGGAGGCCCAGTCTGTGACATCTGGACGTAAGGACAGCTGAGCGATTATTTGGTGCCAGTTCGTG	0.557143	0.442857	-0.0814085	0.642535	0.723944	-18.3	0.581851
main_Ptges3_chr10:128076792-128076862_3062	Mouse 3' UTR GCLiPP Peak	No	chr10:128076792-128076862	Ptges3	10	393	2.3261	933.705	GTATGTACATTTTAGACCAGATTTGTATTTGCACAGTCAGTATGGCAAATGAGTGGACAATGTTAAATAC	0.342857	0.657143	1.7817	1.8172	0.035493	-11.1	0.398663
main_Ube2g1_chr11:72684468-72684538_4351	Mouse 3' UTR GCLiPP Peak	No	chr11:72684468-72684538	Ube2g1	9	451	1.68163	774.63	TAGTCCATATTTGTTTCTTCTTACAGCAGATTTTCCTCACCTATTGTACAAAGAAATTGCGATGTATATT	0.314286	0.685714	1.30075	1.35525	0.054507	-9.7	0.373612
main_Stx4a_chr7:127848865-127848935_23607	Mouse 3' UTR GCLiPP Peak	No	chr7:127848865-127848935	Stx4a	21	1023	0.866301	905.176	GCTCATTCATGGAGTCCTCCCCTGGAGTCCTCCACAATGCCTGCGAGACAGTTTTCAATGTCCTGTTTGT	0.514286	0.485714	0.312901	0.566056	0.253155	-17.9	0.575882
main_Mtdh_chr15:34140925-34140995_8560	Mouse 3' UTR GCLiPP Peak	No	chr15:34140925-34140995	Mtdh	1	23	3.27537	76.9442	ATTTATGAAATAAAGAGGTCAACAGAATACACAGTGCTGGAAGACACTTGGGAGAGTCTTTTCAATTGAA	0.357143	0.642857	1.57787	1.5841	0.00622535	-7.5	0.401455
main_Slc25a3_chr10:91116870-91116940_2702	Mouse 3' UTR GCLiPP Peak	No	chr10:91116870-91116940	Slc25a3	22	892	1.44901	1320.16	AATCTGCTTGTTGATCAGTGTTGAAAGTGCAAAGGAACTTTTATATATTTGACAGTGTAGGAAATGTCTG	0.342857	0.657143	1.557	1.56421	0.00721127	-13.7	0.366378
main_Rad23b_chr4:55390688-55390758_17391	Mouse 3' UTR GCLiPP Peak	No	chr4:55390688-55390758	Rad23b	12	425	1.92392	835.148	TGTTTGGGGAAGATTGGTAGGGGTCTAATTACTGTTCACTTCCTTGTTGTATTGCAGTAAAAGATTTAAA	0.357143	0.642857	1.60834	1.72068	0.112338	-9.7	0.426256
main_Sdcbp_chr4:6395564-6395634_17095	Mouse 3' UTR GCLiPP Peak	No	chr4:6395564-6395634	Sdcbp	1	33	2.10328	70.8924	AATGGCAATGACACTTTATGATTTTTTCTTTCTTAGCTTGTGCCTATCCTATTATTTTATGTGATATTAT	0.271429	0.728571	0.482451	0.714648	0.232197	-6.7	0.574797
main_Cited2_chr10:17725129-17725199_1776	Mouse 3' UTR GCLiPP Peak	No	chr10:17725129-17725199	Cited2	4	278	1.07785	306.048	TTAATCTTGTGGATTTTGTAGATGGTTTCAAATGACTGCGCTGCGTTCAGATTCATGAGTGAAAGGAAAC	0.385714	0.614286	2.06342	2.1252	0.0617746	-13.7	0.492836
main_Ino80e_chr7:126852728-126852798_23483	Mouse 3' UTR GCLiPP Peak	No	chr7:126852728-126852798	Ino80e	6	104	0.195333	20.749	ACGACCTGGTGATCGACATTCCAGAGTAGCCACCCAGTGCCACCTGCCAGGCACCTCACAGCACTCCTCC	0.614286	0.385714	0.488535	1.15307	0.664535	-14.9	0.431739
main_Map3k1_chr13:111746812-111746882_7600	Mouse 3' UTR GCLiPP Peak	No	chr13:111746812-111746882	Map3k1	1	36	1.7164	63.1116	TGTGATGTAATATTCTTATTTTCTTTGGATCAAAGCTGGACTGAAAATTGTACTGTGTAATTATTTTTGT	0.271429	0.728571	2.50687	2.50687	0	-4.3	0.589721
main_Ado_chr10:67546472-67546542_2119	Mouse 3' UTR GCLiPP Peak	No	chr10:67546472-67546542	Ado	9	259	1.7125	453.02	ATACATATGTATGTACACACACACATATGAAATGGATACATGGAATAGATGCTTGAGAATTTAGCCATTT	0.314286	0.685714	0.148746	0.516944	0.368197	-13.1	0.735556
main_Pnrc1_chr4:33245735-33245805_17210	Mouse 3' UTR GCLiPP Peak	No	chr4:33245735-33245805	Pnrc1	7	311	1.86163	591.347	TATATATACAGTGGAGATAGTCTAAGTGGGTGCTAAGGCACATGGAAGACTGTTTATTTGCACAGGTACC	0.414286	0.585714	1.39669	1.44373	0.0470423	-17.1	0.536144
main_Slc2a3_chr6:122729484-122729554_21686	Mouse 3' UTR GCLiPP Peak	No	chr6:122729484-122729554	Slc2a3	20	812	0.934006	774.63	GAGGGCCCTGGGGGATTGAACAAAAGACCCCCTCCTCACTTGATACAGCTCTGCACAGCAAAGTAACTTG	0.528571	0.471429	0.628831	0.871169	0.242338	-18.5	0.639161
main_Ahcy_chr2:155059803-155059873_15322	Mouse 3' UTR GCLiPP Peak	No	chr2:155059803-155059873	Ahcy	15	347	2.17099	769.442	AGGAAAAGGCCTGTCACTTCTGTATAGTTGATGGTTCCTGTCACAAGCCCAGGTCACAAACAGATTAATT	0.428571	0.571429	0.630282	0.813465	0.183183	-11.9	0.509561
main_Rab11b_chr17:33746634-33746704_11112	Mouse 3' UTR GCLiPP Peak	No	chr17:33746634-33746704	Rab11b	32	899	1.37935	1266.55	TTTGTAAAATTTACGCCAAACCCCAGCTCTCGAACTCTTATTCTCCCTGTAGCCCTTGCACTGTTGCCCG	0.485714	0.514286	1.42558	1.49042	0.0648451	-1.9	0.597366
main_Mcmbp_chr7:128698380-128698450_23635	Mouse 3' UTR GCLiPP Peak	No	chr7:128698380-128698450	Mcmbp	21	675	0.258322	178.096	GCTTTAGAGCGCCGAGCGTGCAGGGAACGGCAAGCTACGGCCTCTGTGCGTGCAGTCCACAGTCCTTTAC	0.614286	0.385714	0.509972	0.870056	0.360085	-24.7	0.470524
main_Pnisr_chr4:21875152-21875222_17171	Mouse 3' UTR GCLiPP Peak	No	chr4:21875152-21875222	Pnisr	1	13	0.455777	6.05179	AATAAGACTATAAATATGCCATTTCTCTTTCAGCTGTAATGTTCTCAAAATATTCTTGAATGTACTGTGA	0.285714	0.714286	2.20538	2.21301	0.0076338	-3.5	0.444196
main_Ywhaz_chr15:36771939-36772009_8604	Mouse 3' UTR GCLiPP Peak	No	chr15:36771939-36772009	Ywhaz	9	474	1.31788	638.032	TGCCCGGCTCCATACGTATCAAGCACAGCGGTAAACAAAATCCCATGTATTTAACTTTTTCTTTCTTTTT	0.385714	0.614286	1.3469	1.44541	0.098507	-3.7	0.481158
main_Psme3_chr11:101321932-101322002_5288	Mouse 3' UTR GCLiPP Peak	No	chr11:101321932-101322002	Psme3	63	2322	1.36116	3228.2	TGTTACATGACTATCGTGATGGGAAAACTGGCTGGAAATAGTAATCACACCTCTCTGTTTTTAGTTAGAG	0.385714	0.614286	2.02573	2.02573	0	-16.7	0.445373
main_Sdccag3_chr2:26383347-26383417_13821	Mouse 3' UTR GCLiPP Peak	No	chr2:26383347-26383417	Sdccag3	11	362	1.67418	619.012	CTGTTCGATAGACTCACTGATTTACTGGAAGACACTTTTATAAAACCACTAAAGCTGAAACGACAGTTTT	0.357143	0.642857	-0.0204789	0.709887	0.730366	-6.2	0.538762
main_Eml4_chr17:83479669-83479739_11806	Mouse 3' UTR GCLiPP Peak	No	chr17:83479669-83479739	Eml4	71	2713	1.30445	3614.65	AGATGCACACATCGAAGTGCGTTCAAAGTCTGTGTCTAGGTATATATGTCCGTGTAGCTCTCTCCTTTTG	0.442857	0.557143	0.819197	1.00993	0.190732	-11.5	0.467333
main_Scd2_chr19:44304917-44304987_13363	Mouse 3' UTR GCLiPP Peak	No	chr19:44304917-44304987	Scd2	37	2352	0.624396	1499.98	CCTTTTCTGGTGGGTTTCAGATTCTCCACCTCTTATCCCTCCCAGGCTTCTGACACTCTCTTCAGCTCTA	0.5	0.5	0.0942535	0.475183	0.38093	-11.7	0.560507
main_Zc3h11a_chr1:133621067-133621137_985	Mouse 3' UTR GCLiPP Peak	No	chr1:133621067-133621137	Zc3h11a	14	629	1.06983	687.311	AGCTGCTAACCATTGTGGACCAAATGTCATGCTACCACTAAACAAAAGACCCACTCAGTCTGTGTTAAAT	0.414286	0.585714	1.41913	1.42085	0.00171831	-7.8	0.53759
main_Erh_chr12:80634067-80634137_6317	Mouse 3' UTR GCLiPP Peak	No	chr12:80634067-80634137	Erh	35	1775	0.751546	1362.52	GCAGTGAGCGCACTAACCCTTTGTGGGGGTGGGGTGGGGACAAGGTTAGTCATATAGCCTCTGGGAAAGT	0.557143	0.442857	0.863507	0.941761	0.0782535	-19.9	0.464342
main_Gnb1_chr4:155558236-155558306_18824	Mouse 3' UTR GCLiPP Peak	No	chr4:155558236-155558306	Gnb1	157	5307	0.340683	1846.66	GCTCAGCAGCGGACTTACTCCCAGCGCCTTCCCTCCCTCCTGTCCCTCCTGTCCCCTCACTGTCCACTTT	0.628571	0.371429	-0.22207	0.689873	0.911944	-7.8	0.525314
main_Dynll2_chr11:87981237-87981307_4774	Mouse 3' UTR GCLiPP Peak	No	chr11:87981237-87981307	Dynll2	42	2118	1.36998	2963.65	TACTCGATTTCATGTGTGTGTCGCAGTAAACAAAAACCAAACTCCTTTCTGTTTAGTTGCCTGGGGAAGA	0.414286	0.585714	2.42324	2.42324	0	-8.9	0.458716
main_Fbxo28_chr1:182316676-182316746_1638	Mouse 3' UTR GCLiPP Peak	No	chr1:182316676-182316746	Fbxo28	87	3886	1.30212	5168.23	TCCTTTGCGCTTCTCTGGTGGAGCTGATGCACAGACCCGTCTTACCTTGCAATAGATTTGTACTAACCAT	0.471429	0.528571	1.63655	1.70235	0.0658028	-11	0.552224
main_Eif3i_chr4:129591999-129592069_18025	Mouse 3' UTR GCLiPP Peak	No	chr4:129591999-129592069	Eif3i	24	1439	1.12055	1646.95	TCGAGTTTGAGGCCTAAGTTCTGGGTCTCCATCCACAACAGAGAAGCTGCTCACAGAAGGTTTTAGACTG	0.485714	0.514286	0.656845	1.06546	0.40862	-19.5	0.549528
main_Apobec3_chr15:79907807-79907877_9166	Mouse 3' UTR GCLiPP Peak	No	chr15:79907807-79907877	Apobec3	19	504	0.576052	296.538	CTACATAGTGGGCTCCAGGACAGCCAGAACTACACAGAGACCCTGTCTCAAAAATAAATTTAGATAGATA	0.414286	0.585714	0.129944	0.30093	0.170986	-10.8	0.632985
main_Pbx2_chr17:34596308-34596378_11199	Mouse 3' UTR GCLiPP Peak	No	chr17:34596308-34596378	Pbx2	1	40	0.19045	7.78088	CTGGGCCAACACCCCCTCCCCCATGCACCCCCACCTCCTGCCCCTCCAGACGGCTTTATTACCTCATACG	0.642857	0.357143	1.25217	1.36755	0.11538	-5.9	0.696626
main_Rpl31_chr1:39371307-39371377_169	Mouse 3' UTR GCLiPP Peak	No	chr1:39371307-39371377	Rpl31	83	5196	0.966829	5131.06	AGACGGTCAACGTGGATGAGAACTAACCTGCTCGTGTCAAATAAAGTTGCAGAACTGCCTTCAGGGTTTG	0.471429	0.528571	0.738859	1.35469	0.615831	-8.8	0.644615
main_Ppp2ca_chr11:52122672-52122742_3797	Mouse 3' UTR GCLiPP Peak	No	chr11:52122672-52122742	Ppp2ca	5	155	1.86218	294.809	TATTGATCAATTTCAGAATTTGTAGAATCCCAGGTAAAGAAAAATAAAGATCAAGGCCACTGTGTAACCT	0.328571	0.671429	1.20106	1.26663	0.0655775	-5.4	0.420733
main_0610007P14Rik_chr12:85816019-85816089_6407	Mouse 3' UTR GCLiPP Peak	No	chr12:85816019-85816089	0610007P14Rik	123	5472	1.66876	9326.68	ATCGTCTTCCACCTCCACTGTCTTCTTCATTCACCCTCTATCCTTAAACCATTTCTGTTTGGCTGCATCC	0.457143	0.542857	0.0968451	0.675437	0.578592	-2.2	0.607489
main_Prpf40a_chr2:53139137-53139207_14288	Mouse 3' UTR GCLiPP Peak	No	chr2:53139137-53139207	Prpf40a	1	21	0.0806137	1.72908	CTTTTGGAGCAACTGGATGATGATCAATAAATTATACCAAATATATGTTTATAGTATGATTTAAAGTCTA	0.257143	0.742857	2.13082	2.13256	0.00174648	-7.4	0.39615
main_Aplp2_chr9:31150415-31150485_25445	Mouse 3' UTR GCLiPP Peak	No	chr9:31150415-31150485	Aplp2	8	214	1.49116	325.932	TTATGTAAGTCAGTTCTTCAGGCTCATTTGCTGTGCTGGTTTTACTATTATTTGTTTTCAATGTATAAAG	0.314286	0.685714	0.244437	0.772155	0.527718	-8.4	0.441145
main_Ccnd3_chr17:47599280-47599350_11488	Mouse 3' UTR GCLiPP Peak	No	chr17:47599280-47599350	Ccnd3	40	1992	1.25437	2552.13	CTGTTGCTTTGCTTGCTGCTTAGCTTCTGTGATTGTGGGGTCTTAAGGGTGCCGTGGTCATTTTAATTTA	0.442857	0.557143	0.863155	1.05544	0.192282	-15.5	0.810689
main_Tsg101_chr7:46889374-46889444_22811	Mouse 3' UTR GCLiPP Peak	No	chr7:46889374-46889444	Tsg101	28	1548	0.731616	1156.76	GCACTTTCTACCCTCTGTAAGCGTCTGTGCTGTGCTGGGACTGACTGGGCTAAATAAAATTTGTTGCATA	0.457143	0.542857	2.10375	2.10375	0	-9.8	0.646196
main_Atxn7l3b_chr10:112926055-112926125_2850	Mouse 3' UTR GCLiPP Peak	No	chr10:112926055-112926125	Atxn7l3b	68	3906	1.35006	5386.1	CCATGGCCCACTCACTCTTGCCTTCAGATAGGGAGCTCAAATGTGACTTTAGTTTTCTTGCCTTTTCTGG	0.471429	0.528571	0.121648	0.62593	0.504282	-9.9	0.530764
main_Khsrp_chr17:57021604-57021674_11657	Mouse 3' UTR GCLiPP Peak	No	chr17:57021604-57021674	Khsrp	38	1036	0.863601	913.821	CTGTGTGTCTCATCTTTTTCCTTTCCAAAATTGGGATCCTTCATGTTGAGCCAGCCTTAGAAAATAGCAA	0.4	0.6	0.902817	0.974366	0.0715493	-9.2	0.434055
main_Mrpl10_chr11:97048891-97048961_4933	Mouse 3' UTR GCLiPP Peak	No	chr11:97048891-97048961	Mrpl10	31	929	0.539391	511.809	TGGGCTGACGTTGGCGTTCCACCCTTCGGGTGTGCTGGGCTGTGGAAAGAATAGGGAAACTGCTTCGTGA	0.571429	0.428571	0.0535775	0.606845	0.553268	-15	0.610389
main_Snx3_chr10:42534738-42534808_1896	Mouse 3' UTR GCLiPP Peak	No	chr10:42534738-42534808	Snx3	15	699	0.994177	709.789	CTAAAATAAGACATGCCTGAGTTTGGTGAGAAGAAGCAAAACCCGAGACCATTAATGATTCATCCGCACC	0.428571	0.571429	1.3083	1.477	0.168704	-7.3	0.521874
main_Sec62_chr3:30819678-30819748_15945	Mouse 3' UTR GCLiPP Peak	No	chr3:30819678-30819748	Sec62	44	939	0.644523	618.148	CCATCTCCTTGTCATAACATAAGATGTATTCTGTACATAATTTACAAATAAAACATTTTATTTTAATTGT	0.228571	0.771429	1.74868	1.80752	0.0588451	-6.3	0.481512
main_Mpnd_chr17:56016599-56016669_11570	Mouse 3' UTR GCLiPP Peak	No	chr17:56016599-56016669	Mpnd	49	1853	0.595205	1126.5	TGAGGCTGCATAGGCTTTGCTGTCCTGGGACAGGCTGGGTAATAAAGTCTCTGAGTGCCCACAGCACAAG	0.542857	0.457143	-0.0304789	0.793352	0.823831	-21.3	0.556613
main_Gabbr1_chr17:37073640-37073710_11385	Mouse 3' UTR GCLiPP Peak	No	chr17:37073640-37073710	Gabbr1	83	3886	0.569814	2261.64	GTGTGCAGTGGTGTGCTTGGGTAGGCGTGCATGATGTGTTGAGCACACCAAGCTGTCTTCCTCATGTGCA	0.542857	0.457143	-0.00878873	0.586676	0.595465	-21.9	0.474235
main_Srsf1_chr11:88049716-88049786_4780	Mouse 3' UTR GCLiPP Peak	No	chr11:88049716-88049786	Srsf1	59	2195	2.38855	5354.97	TGTTGAATTGCATTCTTGTGTAATATCCCCTTGCTCCTAACATCTACATTCCCCTCATGTCTTTGGTAAC	0.4	0.6	2.10404	2.10404	0	-6.5	0.506179
main_Arpc4_chr6:113388779-113388849_21530	Mouse 3' UTR GCLiPP Peak	No	chr6:113388779-113388849	Arpc4	43	1550	0.479469	759.068	ATCTAGCTGGATCTCGCAGCCTTCCCCTCGGCCTCCCTGTGTCTCTGCGTCTGCAAAGGTGTCCTGGAGT	0.6	0.4	0.767099	0.851014	0.0839155	-12.8	0.503319
main_H2afx_chr9:44335258-44335328_25584	Mouse 3' UTR GCLiPP Peak	No	chr9:44335258-44335328	H2afx	8	197	0.300767	60.5179	ACCTCCCTCACAGAAAGAGCTGAGCCACTTCGGGCTGCGGCGGCTTGCCGCGTCCCCATCCTTTCTCTTT	0.614286	0.385714	-0.0284507	0.899775	0.928225	-20.2	0.562217
main_Tnpo2_chr8:85057218-85057288_24573	Mouse 3' UTR GCLiPP Peak	No	chr8:85057218-85057288	Tnpo2	16	626	1.10065	703.737	GAGGGGGAGGGAGTTCCAACTACCTTCAGGAAACGGGAGCCTGATTCTTGTATTTCCCTTTTTTTATTTT	0.442857	0.557143	0.559268	0.817352	0.258085	-17.1	0.666999
main_Rap1b_chr10:117815502-117815572_2918	Mouse 3' UTR GCLiPP Peak	No	chr10:117815502-117815572	Rap1b	26	1043	1.88928	2012.65	CTACATCCAGTATTACTGCTAAGAGACATTCTTCATCCACCAATGTTGTACATGTATGAAAATGGTGTAC	0.371429	0.628571	2.35021	2.35021	0	-9.1	0.501653
main_Hmgb1_chr5:149047653-149047723_20534	Mouse 3' UTR GCLiPP Peak	No	chr5:149047653-149047723	Hmgb1	26	1209	1.87212	2311.79	CGCTGGCTGTAAAGCCTTTGCCCTTCTATCTAGATATGGATTGCTCAGGAAACTTGACTGTTTAAAGGTA	0.428571	0.571429	0.553028	0.719056	0.166028	-13.1	0.536102
main_Insig1_chr5:28076889-28076959_18975	Mouse 3' UTR GCLiPP Peak	No	chr5:28076889-28076959	Insig1	12	423	1.55882	673.478	TTTTTCTCAATGTTCCATTTAGGCTGGGCTGACGATAAATGACTCCTAAAGACATGTTCACTTAGTCTAG	0.385714	0.614286	0.457085	0.698211	0.241127	-10.4	0.481755
main_M6pr_chr6:122316794-122316864_21657	Mouse 3' UTR GCLiPP Peak	No	chr6:122316794-122316864	M6pr	59	3419	0.812774	2838.29	TGGTTGCCTCAAGTTGTTCTGCAGTGCTTACCTGGCTGTAACCCAAATACTCCCATTTGCTTTGAGCCTG	0.485714	0.514286	0.682211	0.887986	0.205775	-12.8	0.457977
main_Rad23b_chr4:55390519-55390589_17389	Mouse 3' UTR GCLiPP Peak	No	chr4:55390519-55390589	Rad23b	5	193	1.07889	212.677	GAAGGAAGCCCATTCTTCGTGTTCAGTGCTGGGGATGGGGTGGGGACTTTTCTTAAAACGAAAATAATTA	0.442857	0.557143	1.33477	1.40252	0.0677465	-16.6	0.441891
main_Eif4h_chr5:134619967-134620037_20137	Mouse 3' UTR GCLiPP Peak	No	chr5:134619967-134620037	Eif4h	54	2122	0.679309	1472.32	TGCGGAAAAGACAGGCCCGTCCATCCACATTGCTGGGCACCCAGCTGACTGTAAGAATGGAATTCCAAAC	0.528571	0.471429	1.01124	1.14403	0.132789	-15.3	0.461362
main_Tram1_chr1:13566247-13566317_43	Mouse 3' UTR GCLiPP Peak	No	chr1:13566247-13566317	Tram1	31	1131	2.30583	2663.65	CGGAAGCTGACTGATTATTGTCCCCAAAGAATCTGCTTTCTGCTCTATCTTTCAGCACTAGCAATTTTTC	0.414286	0.585714	1.49644	1.55506	0.0586197	-10.1	0.458024
main_Ddx19a_chr8:110975884-110975954_24898	Mouse 3' UTR GCLiPP Peak	No	chr8:110975884-110975954	Ddx19a	53	1601	0.705281	1153.3	GCCTGACGGGCCCCTCAGAGACCACGGGCTGAGTAGAGACTACCTACCTCATTCGGAATTACGTTTGGAC	0.571429	0.428571	0.734254	1.11859	0.384338	-15	0.550671
main_Rtn4_chr11:29742002-29742072_3533	Mouse 3' UTR GCLiPP Peak	No	chr11:29742002-29742072	Rtn4	16	576	1.66644	980.391	CCTGGATTGAAGCGCAAAGCAGAATGAAAAGGCCCCAAACAGTAGACATTCATCTTTAAAGGGGACACTC	0.457143	0.542857	1.24511	1.41286	0.167746	-10.3	0.430259
main_2810417H13Rik_chr9:65902399-65902469_26024	Mouse 3' UTR GCLiPP Peak	No	chr9:65902399-65902469	2810417H13Rik	4	81	2.43483	201.438	CTAGTTGACAACCATACAAAGAGATAAAATACTAACAGAAGCAGGGACAAAGACTCCATAGATACATTAA	0.342857	0.657143	0.141239	0.683324	0.542085	-1.3	0.565032
main_P4ha1_chr10:59371800-59371870_1974	Mouse 3' UTR GCLiPP Peak	No	chr10:59371800-59371870	P4ha1	4	153	1.18945	185.877	TTAGGAGACTGGGAGTTAGAAAACGGACAGGTCCTTGGACTGAGGGAGTTGATTTTTAAAAAGAAATGTT	0.4	0.6	0.966099	1.23852	0.272423	-10.5	0.531567
main_Csnk1a1_chr18:61588180-61588250_12388	Mouse 3' UTR GCLiPP Peak	No	chr18:61588180-61588250	Csnk1a1	8	280	1.85008	529.1	TGTATGTGTGTTGCTTAGATAAATGTAATCACTGTAAACATCTATACGATCTGGGATTTTGTTTTTATTT	0.285714	0.714286	2.49215	2.49215	0	-8.3	0.374321
rapidmain_Cdca4_chr12:112821206-112821276_6724	Mouse 3' UTR GCLiPP Peak	Yes	chr12:112821206-112821276	Cdca4	34	2083	1.99725	4249.22	TATCCTTTTGTGTGACATTGGACTCACTGTGGAGGATGGTGTGTCACAGCTATGTCTAGTCTATTTTCAA	0.414286	0.585714	-0.389718	0.851662	1.24138	-14.4	0.572937
main_Slc48a1_chr15:97791727-97791797_9542	Mouse 3' UTR GCLiPP Peak	No	chr15:97791727-97791797	Slc48a1	55	2145	0.814085	1783.55	CACTTGGGCACTGCCCCCAGCTCTCTGCCTTACCTGTGTTATGGGCACTTAAGCAGAAATACAGCGGCCA	0.557143	0.442857	0.895521	1.00952	0.114	-16.6	0.636853
main_Mdm4_chr1:132990843-132990913_966	Mouse 3' UTR GCLiPP Peak	No	chr1:132990843-132990913	Mdm4	17	752	1.47002	1129.09	TAGAGAGGAGGAATGTAGCAGCTGTGAAAGGAGGGGAACAAATTGATCTCTTCAATTCTGCTTAGTCATT	0.414286	0.585714	0.0924648	0.580352	0.487887	-13.2	0.628958
main_Ttc39b_chr4:83226437-83226507_17518	Mouse 3' UTR GCLiPP Peak	No	chr4:83226437-83226507	Ttc39b	5	128	2.72449	356.191	CTCATATCAGATCCAATAATAGCATTCAATCACATAGACACATTTCTCATGTATCTAAGGGAATAAAAAG	0.314286	0.685714	0.226169	0.682845	0.456676	-4.7	0.606558
main_Pdcd6_chr13:74303886-74303956_7437	Mouse 3' UTR GCLiPP Peak	No	chr13:74303886-74303956	Pdcd6	24	1162	1.04458	1239.75	TGTATAACCAGGCCTTGAGAACAGCAAGCACGGCATGCAAAAGACTGAAGATGCCAAATCCCTTACCTGT	0.471429	0.528571	0.136704	0.767042	0.630338	-10.1	0.433554
main_Aebp2_chr6:140652762-140652832_22026	Mouse 3' UTR GCLiPP Peak	No	chr6:140652762-140652832	Aebp2	4	59	1.17641	70.8924	TTGACCGATGATTGTAGACCTTGCTTGAGTATTTTTTCTAATAAAACAAAGCAAATTATACTTAGCTTCA	0.3	0.7	2.12611	2.12611	0	-7.7	0.595408
main_Cox17_chr16:38352621-38352691_10345	Mouse 3' UTR GCLiPP Peak	No	chr16:38352621-38352691	Cox17	2	35	0.725523	25.9363	GTAGGTGGCCTACTTTGTGAATGAATAATCCTTGAAGAATGAAGAAGATTAAATATTTTGGAAGTTCTTT	0.314286	0.685714	1.05572	1.19146	0.135746	-10.8	0.402295
main_Hsp90aa1_chr12:110691475-110691545_6639	Mouse 3' UTR GCLiPP Peak	No	chr12:110691475-110691545	Hsp90aa1	17	408	3.33391	1389.32	GACTAAGTCACCAGAACTATGTGTTTGCTTACCTTCATTCCTTCTGATAATATATTTTCCATGATTTTTG	0.328571	0.671429	0.231099	0.760704	0.529606	-6.3	0.35011
main_Tex261_chr6:83770763-83770833_21221	Mouse 3' UTR GCLiPP Peak	No	chr6:83770763-83770833	Tex261	50	2199	1.62591	3651.83	TGCATTTTGCTGTTGAAATGTGGGTCCTGTCCAATGCTGATTCCCTTTCGAATAAAGATTCTAGGTGGCA	0.428571	0.571429	1.55715	1.64532	0.088169	-9.6	0.557434
main_Cstf2t_chr19:31085339-31085409_13236	Mouse 3' UTR GCLiPP Peak	No	chr19:31085339-31085409	Cstf2t	2	57	2.04928	119.307	TACAGTATTGATATACTAAGATGGTTTAAAGGTTTTTGGTTGTATATTAACTGAATGTCAGCATCTTAAG	0.285714	0.714286	0.504	0.764535	0.260535	-11.1	0.471335
main_Sumo3_chr10:77617048-77617118_2212	Mouse 3' UTR GCLiPP Peak	No	chr10:77617048-77617118	Sumo3	60	3157	0.65903	2125.04	GTGGTTGTAAAAGCAAGCCCAGGAAAGGTGACCTCATTCTCACGGACTGTGCTGTGCAGCTTTCCAAGTG	0.514286	0.485714	0.115225	0.601394	0.486169	-16.7	0.468588
main_Etf1_chr18:34904790-34904860_12087	Mouse 3' UTR GCLiPP Peak	No	chr18:34904790-34904860	Etf1	12	377	1.32243	509.215	TTGGATACTGAAAAGAAAAGTGAAACAAAACCAGACCCAACCCTACACTTTGGTTTGTCGTGGTGTCAGC	0.428571	0.571429	2.17032	2.18675	0.0164225	-10.5	0.347356
main_Cdkn1b_chr6:134925212-134925282_21965	Mouse 3' UTR GCLiPP Peak	No	chr6:134925212-134925282	Cdkn1b	6	138	3.04842	429.677	GAGAAAAACTTGGAAGTGTGCCTGTGTATATAACTCTGTAAAGACACTGAAAATTATACTAACTTATTTA	0.3	0.7	2.01492	2.01492	0	-5.2	0.512675
main_Kdm1a_chr4:136550586-136550656_18347	Mouse 3' UTR GCLiPP Peak	No	chr4:136550586-136550656	Kdm1a	2	30	2.4829	76.0797	CTGCTCGAGAAGCAAGTGGTGTGAGATAACCTCTTAGTCTATGGTGTTTGTTTGTTTTTGTTTTTTTTTA	0.357143	0.642857	0.455014	0.68107	0.226056	-11	0.38929
main_Gsk3b_chr16:38243382-38243452_10340	Mouse 3' UTR GCLiPP Peak	No	chr16:38243382-38243452	Gsk3b	6	268	2.01188	550.713	TATTAATGAGCAAAAAGTTACTGTTCAGGGCAGTGATTCTGTTCAATAACCAGACAAAAATGTAGACGAG	0.357143	0.642857	2.6163	2.6163	0	-14.2	0.558016
main_Med13_chr11:86270345-86270415_4742	Mouse 3' UTR GCLiPP Peak	No	chr11:86270345-86270415	Med13	5	160	3.84603	628.522	GGGTTGCTTTTAGAGTATTATTTTTTTGTAAGGGGGTGGGGTGGACAGTAAATTTGTATTGTCTCAATGT	0.371429	0.628571	2.09392	2.15307	0.0591549	-10.3	0.695988
main_Slc3a2_chr19:8707628-8707698_12945	Mouse 3' UTR GCLiPP Peak	No	chr19:8707628-8707698	Slc3a2	10	394	2.05596	827.367	CCTCCTTTGTTCTCCCCAGGCCTTTTGGATTCTAGTCTTCCTCTCCTTGTTTTTAAACTTTTGCAGATTA	0.414286	0.585714	0.202282	0.746761	0.544479	-3.2	0.44974
cd8_Srsf2_chr11:116850511-116850581_2767	Mouse 3' UTR GCLiPP Peak	No	chr11:116850511-116850581	Srsf2	6	171	1.99483	348.41	AAAGCTGTCAGCAGAATGACTCAACATTGCCTTCACTTCTTAATAATTAAAAACCTATGAAAGTTGGTGT	0.342857	0.657143	2.12763	2.16865	0.0410141	-5.7	0.603652
main_Ypel5_chr17:72848866-72848936_11750	Mouse 3' UTR GCLiPP Peak	No	chr17:72848866-72848936	Ypel5	44	2282	1.74333	4063.35	ACACTGTCACCTTAGCATCAGAGTCGGATTCATGAACTGCGGAACAAGAGGTTATGAGAATCTAAGATGG	0.442857	0.557143	2.19924	2.22206	0.0228169	-8.9	0.562319
main_Tmem30a_chr9:79769021-79769091_26157	Mouse 3' UTR GCLiPP Peak	No	chr9:79769021-79769091	Tmem30a	8	249	2.47134	628.522	GGAGAAGATAACTGTTCTAATAGAGGATAATCGAATTGATTGTCAAGTGGATGTTATTTATTGGATAGTG	0.328571	0.671429	0.57562	0.765423	0.189803	-14.7	0.407501
main_Usp9x_chrX:13169658-13169728_26788	Mouse 3' UTR GCLiPP Peak	No	chrX:13169658-13169728	Usp9x	16	540	3.73689	2061.07	CAGTGGAAAGTGTATAGTGTTTTGTAATAAATGGCCTGATGCTAATGTGTAAATGGCAAAGGTGTATATA	0.342857	0.657143	2.62261	2.62261	0	-8.5	0.486535
main_Knstrn_chr2:118834489-118834559_14813	Mouse 3' UTR GCLiPP Peak	No	chr2:118834489-118834559	Knstrn	19	619	1.62588	1027.94	CCATGCTGTCCCCTTGTCTCTCTGGTTGAGTTAAGTTTTATGAACTTGAAATTCTTGAAGTTTTTTTGGC	0.385714	0.614286	0.339028	0.650775	0.311746	-8	0.509585
cd8_Glipr2_chr4:43978054-43978124_8388	Mouse 3' UTR GCLiPP Peak	No	chr4:43978054-43978124	Glipr2	5	171	0.910793	159.076	TTTTGCTTTTTAAAGCAGACTTCATTTGAAACTTTCTTCCTTCTAATATCCATCCTTGGGCTTTGAGGAT	0.342857	0.657143	0.567338	0.79038	0.223042	-12.2	0.585113
main_Wsb2_chr5:117378453-117378523_19754	Mouse 3' UTR GCLiPP Peak	No	chr5:117378453-117378523	Wsb2	36	1900	2.97503	5773.41	CTTATTCTTTGGCCTTTCTTAATTGATGCTTTATGGAGGCAGTGTTAACATTGTACAGTGTATGCATAGA	0.357143	0.642857	0.465169	0.717028	0.251859	-11	0.477757
main_Zfyve21_chr12:111828279-111828349_6690	Mouse 3' UTR GCLiPP Peak	No	chr12:111828279-111828349	Zfyve21	6	155	2.49018	394.231	AGGCGTCAGCTTTCTGTTTTCTACTTTCACTTACTATTTCACTTTATTAAAATGACTGTACAGTAATTTG	0.314286	0.685714	0.640704	0.905831	0.265127	-3.8	0.521738
main_Pafah1b2_chr9:45968523-45968593_25719	Mouse 3' UTR GCLiPP Peak	No	chr9:45968523-45968593	Pafah1b2	5	99	1.11149	112.39	GTTCCTGGATGCTTGTATGTTTGAAGGGGAGGAGGGATTTAAATTGGTCCTGTATATAAAGGTTTTGTTT	0.385714	0.614286	1.81948	1.82393	0.0044507	-10.1	0.553609
main_Ube2e3_chr2:78920523-78920593_14451	Mouse 3' UTR GCLiPP Peak	No	chr2:78920523-78920593	Ube2e3	31	1308	1.00693	1345.23	TTGTAGCTCAGAGAGCACTGATGTATCATCTCAAACACAATAAACATGCTCCTGAAGGCATAGTTTCTTG	0.4	0.6	2.29711	2.29711	0	-13	0.538062
main_Abracl_chr10:18011577-18011647_1785	Mouse 3' UTR GCLiPP Peak	No	chr10:18011577-18011647	Abracl	4	131	2.7784	371.753	ATTGCTGCAAGATTAATGTGGTTTGCATGGCTTGGTGTATCTGATAAACTGGAATAACTAAGTTAAAAGA	0.342857	0.657143	1.06625	1.162	0.0957465	-12.7	0.507484
main_Lrrc47_chr4:154020533-154020603_18774	Mouse 3' UTR GCLiPP Peak	No	chr4:154020533-154020603	Lrrc47	34	1835	0.867201	1625.34	TCTGAATCATGTGGCCTGTGGCCGTGCTGGAGAGTCAGGTTGAACGCAGGCATTCTATTGAACAGTATTT	0.485714	0.514286	0.0358732	0.47531	0.439437	-18.1	0.622632
main_Lamc1_chr1:153220058-153220128_1216	Mouse 3' UTR GCLiPP Peak	No	chr1:153220058-153220128	Lamc1	6	349	2.08579	743.506	TATGCAATTTTGTACTTTGCGTAGCGGGGGAAAGAAACTATTATCTGACACACTGGTGCTATTAATTATT	0.357143	0.642857	2.14524	2.14963	0.00439437	-10.3	0.586953
main_Msi2_chr11:88344166-88344236_4803	Mouse 3' UTR GCLiPP Peak	No	chr11:88344166-88344236	Msi2	2	55	1.69289	95.0996	TTTTTGTTTTGTTTTGATTCTGTTCTCGCTTTTAAAGGATGCTGAGATGGTGATGTTACTCTCCATTTTT	0.328571	0.671429	1.56597	1.58758	0.0216056	-8.4	0.57432
main_Nras_chr3:103067407-103067477_16688	Mouse 3' UTR GCLiPP Peak	No	chr3:103067407-103067477	Nras	12	428	0.411356	179.825	AGCTCAGCTCTATATGAGAAGTGGAGTTAATGGAAAACGTGTTGACTGGGTGGTTTCTATTTAAAAGAGT	0.385714	0.614286	0.820408	0.927	0.106592	-13	0.493008
main_Sdad1_chr5:92285016-92285086_19411	Mouse 3' UTR GCLiPP Peak	No	chr5:92285016-92285086	Sdad1	20	995	1.75669	1785.28	TTAACCATCCAACCCAATGTTTAGGCAGCTAGTGTAAAGCCCATATTGAATATCCATTGTGTATAAAGCA	0.371429	0.628571	0.0503803	0.546239	0.495859	-7.7	0.48627
main_Arpc5l_chr2:39015521-39015591_14259	Mouse 3' UTR GCLiPP Peak	No	chr2:39015521-39015591	Arpc5l	10	443	0.78339	354.462	AAGACAGGCTCTCTTGGGTTCATTGTAAAGTGCCTGCTGCATCAATAAAGCTCTTGGCTTATTAGTCTAT	0.414286	0.585714	2.01318	2.0313	0.0181127	-13.5	0.711182
main_Slc6a6_chr6:91755257-91755327_21405	Mouse 3' UTR GCLiPP Peak	No	chr6:91755257-91755327	Slc6a6	17	662	1.4947	1010.65	CAAAAAGAAAACCCATAGGCCTACGTCCTGGGGAAGAGGATGGACTTTCATATTGATTTCCATGTATTTT	0.4	0.6	0.859577	1.06059	0.201014	-12.5	0.581724
main_Aph1a_chr3:95897372-95897442_16582	Mouse 3' UTR GCLiPP Peak	No	chr3:95897372-95897442	Aph1a	6	223	2.88094	656.187	CTATCACTGTGTTGTTTTTCTGCTGAGGGTGGAATATTCTGTCCTTTTAATCAAGGTGATTGTGATTTTG	0.371429	0.628571	1.75544	1.83248	0.0770423	-10.5	0.486613
main_Mllt6_chr11:97684111-97684181_5023	Mouse 3' UTR GCLiPP Peak	No	chr11:97684111-97684181	Mllt6	24	1184	1.03875	1256.18	AAAGAGCTTGGTAGAAGGAGAGAAAGGATGCAGATTTGGGGCCATCTCTATCTGGGAGGGGGAGGATGTG	0.514286	0.485714	0.508958	0.894338	0.38538	-10.5	0.515886
main_Map2k4_chr11:65690091-65690161_4161	Mouse 3' UTR GCLiPP Peak	No	chr11:65690091-65690161	Map2k4	12	269	2.59912	714.112	CTGTTGCTTTACCGTCACACGCGATGTGCTCAGCCAAATTCCCTACTCAAAATATCATGTTAAATTAGAA	0.4	0.6	1.73548	1.75196	0.0164789	-4.4	0.630044
main_Caprin1_chr2:103765533-103765603_14722	Mouse 3' UTR GCLiPP Peak	No	chr2:103765533-103765603	Caprin1	13	484	1.50051	741.777	GCATTGCTAGTGTCACAGCCTTTGGTTATGTCTAGTAGCTGTTTCTGAAGTATTTTCATTTATCTTTTGT	0.357143	0.642857	0.840944	1.04492	0.203972	-10.8	0.439747
main_Irak1_chrX:74014500-74014570_26969	Mouse 3' UTR GCLiPP Peak	No	chrX:74014500-74014570	Irak1	14	359	1.22369	448.697	CAGAAAGGTCCAGCAAAGCCCAGCTTTGTGGTACCCAGACAGTGAGAAGCCCCAAGAAAGAAGAAACTGA	0.5	0.5	0.127732	0.522803	0.39507	-14.6	0.564034
main_Selk_chr14:29974877-29974947_7795	Mouse 3' UTR GCLiPP Peak	No	chr14:29974877-29974947	Selk	42	1648	2.01852	3397.65	TTGTCTGGCTTTTCCAAGCCATCACCCCCTTCTCCAGTGTATATAGTTCTGTTAATTTTGCCTTTTCTCA	0.414286	0.585714	0.228718	0.531141	0.302423	-6.8	0.585194
main_Vapb_chr2:173779279-173779349_15763	Mouse 3' UTR GCLiPP Peak	No	chr2:173779279-173779349	Vapb	3	129	2.79523	368.295	CCATAAAAGACCGATCCAGTTCTGCTCAACTATGTAGCATCTTAAAGGAAGAGATTAAAATAAAGCCCCA	0.385714	0.614286	1.50292	1.55877	0.0558592	-4.7	0.674193
main_Ranbp1_chr16:18240030-18240100_10074	Mouse 3' UTR GCLiPP Peak	No	chr16:18240030-18240100	Ranbp1	12	362	1.33046	491.924	AGGAGAAACAATGAATCACTCTGTCTTTTTCCTTTCCTTTTCTTTTTAAAAATTTGCCCTACCCTTTAAG	0.328571	0.671429	0.752408	1.07165	0.319239	-5.9	0.453769
main_Cyb5b_chr8:107184677-107184747_24793	Mouse 3' UTR GCLiPP Peak	No	chr8:107184677-107184747	Cyb5b	45	1859	1.56995	2980.94	TGAAAGATGTGTGTGTGTGCTTACCTTCTATACACTTCTCTCCGGTCCGTGGGGCTTCACAAAGGCCTTT	0.485714	0.514286	-0.107366	0.656718	0.764085	-15.5	0.497177
main_Ssr1_chr13:37978346-37978416_7048	Mouse 3' UTR GCLiPP Peak	No	chr13:37978346-37978416	Ssr1	4	157	0.587658	94.2351	TCCCTTCCACACACAGCTAAAGGAAAGCTACAAAATAAAACACACACAGAAACAAACTTATAAGCTGTTT	0.357143	0.642857	-0.0303239	0.549507	0.579831	-5.97	0.461846
main_Agps_chr2:75926207-75926277_14438	Mouse 3' UTR GCLiPP Peak	No	chr2:75926207-75926277	Agps	82	4020	1.1408	4684.09	AGATGGCGCTCCTGGGCCTCATTGTAGGTGTACCAGTTTATAGCCAACTAACTGGTTGTCGTTTCAGATT	0.471429	0.528571	1.12913	1.18868	0.0595493	-15.8	0.549796
main_Ago2_chr15:73105995-73106065_8834	Mouse 3' UTR GCLiPP Peak	No	chr15:73105995-73106065	Ago2	45	2682	1.14658	3140.88	TATCTGGTTTGCAGTATTAATGTGGTAGGTAGATGCTGTTTCCCTTTCGTTGACGAGGGGCGCTTCTTGT	0.457143	0.542857	1.26301	1.37163	0.10862	-14.7	0.606159
main_G3bp2_chr5:92054523-92054593_19402	Mouse 3' UTR GCLiPP Peak	No	chr5:92054523-92054593	G3bp2	1	22	1.19272	26.8008	TTAATTTATAAAGCTAGACTTGGAGAATTAAGGACTGAGAAATGACCATATCTTAAACTGTCTACAACAA	0.3	0.7	2.02392	2.08439	0.0604789	-6.6	0.38457
main_Sec11a_chr7:80915613-80915683_23029	Mouse 3' UTR GCLiPP Peak	No	chr7:80915613-80915683	Sec11a	46	2763	0.811826	2291.04	CATGTGCACCGTGGAGTGCACACAAGGGGACTGTCAATCACAGGGTTTCATATGTTGTCATTGTCACTCT	0.485714	0.514286	1.07469	1.55773	0.483042	-19.4	0.537781
main_Ube2v1_chr2:167608886-167608956_15652	Mouse 3' UTR GCLiPP Peak	No	chr2:167608886-167608956	Ube2v1	48	2373	1.59765	3872.28	AACTTCTCGTCCATTTGAAATACCTAAGTTGTGCTGTGTAACATCAACTGTTGAGTGTAACCGCTGTCTG	0.414286	0.585714	1.42586	1.42586	0	-6.5	0.530358
main_Icam1_chr9:21028292-21028362_25322	Mouse 3' UTR GCLiPP Peak	No	chr9:21028292-21028362	Icam1	15	411	1.38397	580.972	AGCTGAGACATTGTCCCCAACTCTTCTTGATGTATTTATTAATTTAGAGTTTTACCAGCTATTTATTGAG	0.328571	0.671429	0.302408	0.663761	0.361352	-11.8	0.541818
main_Calm2_chr17:87433983-87434053_11873	Mouse 3' UTR GCLiPP Peak	No	chr17:87433983-87434053	Calm2	12	570	2.26906	1321.02	TTTGTACAAATGATGACAGCGAAGTGAAGACATTGTACAGAATGTGTTAAATTTCTTGTACAAAATTGTT	0.3	0.7	2.34561	2.38313	0.0375211	-14.1	0.411681
main_Prpf19_chr19:10905426-10905496_13089	Mouse 3' UTR GCLiPP Peak	No	chr19:10905426-10905496	Prpf19	23	747	0.444184	338.9	AGGGAGGAGGAGCCAAGGGAGCTGTGAAGGGGAGGGGCAGGAGGACTCTTGCAGGGTTTTGTAAGCAGCG	0.614286	0.385714	1.06739	1.39652	0.329127	-17.6	0.562732
main_Azin1_chr15:38489731-38489801_8627	Mouse 3' UTR GCLiPP Peak	No	chr15:38489731-38489801	Azin1	26	1412	1.64493	2372.3	AGATCTTACTGTTTTTTCAGGCTAAAACTTTGGGAATGGGGCTAGCTAGCAAAGGTAGTTATGAACTAGT	0.385714	0.614286	2.0413	2.0422	0.000901408	-13	0.589372
main_Dcp2_chr18:44421957-44422027_12258	Mouse 3' UTR GCLiPP Peak	No	chr18:44421957-44422027	Dcp2	70	3859	1.27723	5034.23	TGGATGAAAGGGCATTTCTGTCAACGTAGTTCATCAGGAAGGTTGTTTGTTTAGGTTTTCCCTGTATACA	0.4	0.6	0.144563	0.504873	0.36031	-9.8	0.612572
main_Ucp2_chr7:100499478-100499548_23182	Mouse 3' UTR GCLiPP Peak	No	chr7:100499478-100499548	Ucp2	22	1081	0.65617	724.486	CTGTACTGATGACTCACAGTGAGGAGGCCTGACACCAGACCCTGAGCCCTCAGCCCTTTCTACAGCTAAG	0.557143	0.442857	0.0338732	0.505028	0.471155	-14.1	0.524263
main_Map3k1_chr13:111748345-111748415_7601	Mouse 3' UTR GCLiPP Peak	No	chr13:111748345-111748415	Map3k1	7	195	1.60607	319.881	GGCTGTAAAAAAAAAAAATCATTGCCTGGTCAGAGTGTGTATGAGAAGCAGTAAATACATGCGTTTTTAA	0.342857	0.657143	1.21144	1.30856	0.0971268	-9.3	0.563918
main_Srp72_chr5:76998822-76998892_19335	Mouse 3' UTR GCLiPP Peak	No	chr5:76998822-76998892	Srp72	59	3738	1.43112	5463.91	AATTGTCCTGTGATACTGGAATTGGGACTCTCTCTCGTGTGTGTGTATTTGTGCACATCTGACTCCTTTG	0.442857	0.557143	-0.0898592	0.634197	0.724056	-12.4	0.548012
cd8_Arl6ip1_chr7:118120117-118120187_11540	Mouse 3' UTR GCLiPP Peak	No	chr7:118120117-118120187	Arl6ip1	52	2387	0.714885	1742.92	CTCTGTGCGGGCTCTAGTGCCAGGTGTAGCTGGGTACATTCCCCGTCAGTGTGACTTCCTTTCATTTTGA	0.528571	0.471429	0.253028	0.673592	0.420563	-17.7	0.587775
main_Prosc_chr8:27053624-27053694_24014	Mouse 3' UTR GCLiPP Peak	No	chr8:27053624-27053694	Prosc	52	2146	0.700899	1536.29	TGAGTTCGGTTGAGCACTGCTCAGGAATACCCAGCCCCTCACAAATGCGTGTCCCCAAGTGACTTTTGGG	0.542857	0.457143	0.112915	0.624211	0.511296	-15.2	0.573072
main_Atp1b3_chr9:96333094-96333164_26244	Mouse 3' UTR GCLiPP Peak	No	chr9:96333094-96333164	Atp1b3	7	245	1.72744	432.271	CCAACAAAGTTTTAGGGATACAATGGTACCTTGCCAACATCGAGTGACTTTAGCTGGAAGAAATGTCTGA	0.414286	0.585714	0.917549	0.979239	0.0616901	-10.8	0.381971
main_Tbca_chr13:94842740-94842810_7486	Mouse 3' UTR GCLiPP Peak	No	chr13:94842740-94842810	Tbca	2	189	0.591167	114.12	TATGGGATGTTTTTTTGCATTAAATCCTGGGGTCCATTCTACAATTCATTGTTTTCAGCCACTGCTGTGT	0.385714	0.614286	0.863479	0.952887	0.0894085	-7.5	0.384796
main_Nras_chr3:103065417-103065487_16672	Mouse 3' UTR GCLiPP Peak	No	chr3:103065417-103065487	Nras	21	812	1.84612	1531.1	TAATGGACCGGGTCATGGTTTCAAAACTTGAACAAGCCAGTTAGCATCACAGAGAAACAGTCCATCCATA	0.428571	0.571429	0.813831	0.955718	0.141887	-11.1	0.55526
main_Ptgfrn_chr3:101043167-101043237_16653	Mouse 3' UTR GCLiPP Peak	No	chr3:101043167-101043237	Ptgfrn	97	4645	0.778291	3692.46	GGACTCGGCGCTCTCTCTTTTCTGCATGTCAAGTTCTGAGCGAGGACATGTTTACCAGCACACAGCTCTT	0.514286	0.485714	1.18149	1.36882	0.187324	-12	0.545266
main_Hdgf_chr3:87915147-87915217_16209	Mouse 3' UTR GCLiPP Peak	No	chr3:87915147-87915217	Hdgf	9	326	0.353117	117.578	TTCCCAGGGTTTCTGCTGGGGTCTAGGCTGCTGTTTCCACCTCTTGACACCTCTGCCCTGCTGCAGGCAT	0.585714	0.414286	0.0274225	0.630662	0.603239	-17.9	0.447845
main_Anp32b_chr4:46472121-46472191_17357	Mouse 3' UTR GCLiPP Peak	No	chr4:46472121-46472191	Anp32b	18	620	1.69971	1076.35	AGAGAAACAGATGACGAAGGAGAAGATGATTAAGACCCGAAACAACCTGCAAGAAACAGAACTGTTGAGT	0.414286	0.585714	1.52925	1.5359	0.00664789	-2.4	0.408945
main_Mlf2_chr6:124935763-124935833_21761	Mouse 3' UTR GCLiPP Peak	No	chr6:124935763-124935833	Mlf2	125	7705	1.22281	9623.22	TACGTTTCCATCTTCACCCCTCACTGCGTGTCCCACCCATCCTGTATCCACTAACTTGAGTTCTCATGTT	0.485714	0.514286	0.337394	0.654775	0.31738	-3.3	0.39859
main_Cyb5a_chr18:84879788-84879858_12584	Mouse 3' UTR GCLiPP Peak	No	chr18:84879788-84879858	Cyb5a	21	676	1.83438	1266.55	ATGGTGATGTTTCTTCACTACATAATTTACTTATTGTAAACACGATCTTTTTAAAATATATCTGGCTTGT	0.271429	0.728571	0.605183	0.793155	0.187972	-6.9	0.520772
main_Nras_chr3:103064824-103064894_16669	Mouse 3' UTR GCLiPP Peak	No	chr3:103064824-103064894	Nras	5	170	2.03146	352.733	AGTTTGTAATTGGAATAGATGTGTCAAGAACCATTGTATAGGAAAGTGACTCTGAGCCATCTACCTTTGA	0.371429	0.628571	0.546056	0.710141	0.164085	-12.8	0.48158
main_Arf6_chr12:69373879-69373949_6195	Mouse 3' UTR GCLiPP Peak	No	chr12:69373879-69373949	Arf6	27	1112	2.17396	2469.13	CCAGTATGGTGAACTAAGCCCACAGTGGCAAGATAATGAGTAATAGCAGTGTAATGTTCCAGTTGCACAT	0.428571	0.571429	1.49937	1.52311	0.0237465	-11.9	0.575717
main_Srp19_chr18:34336220-34336290_12046	Mouse 3' UTR GCLiPP Peak	No	chr18:34336220-34336290	Srp19	30	1696	0.764594	1324.48	AAGAAGAAATGACGTGGTGTGAACGTGGAGCACAGTCCTGCTGGGAGAGACATGGCATCCTTGTGTCTGA	0.514286	0.485714	0.44269	0.919056	0.476366	-13.8	0.382483
main_Lypla1_chr1:4846017-4846087_4	Mouse 3' UTR GCLiPP Peak	No	chr1:4846017-4846087	Lypla1	6	232	1.68924	400.283	TTTCTGTAAAACACTTAAAGGGGAAGTAATATCTTGGCATATTTAGAAATACTTGTGACTGGCTTCAAAA	0.314286	0.685714	0.59938	0.701296	0.101915	-5	0.481193
main_Wdr43_chr17:71658086-71658156_11743	Mouse 3' UTR GCLiPP Peak	No	chr17:71658086-71658156	Wdr43	19	824	1.48025	1245.81	GCGGCACTAATGAATTGTTCTTAATCCGGCACGTCTAATTTGACACGTTTTCATGAAGGAATAACTAAGT	0.385714	0.614286	0.674634	0.820493	0.145859	-6.4	0.389636
main_Ywhaz_chr15:36772455-36772525_8610	Mouse 3' UTR GCLiPP Peak	No	chr15:36772455-36772525	Ywhaz	26	1404	1.5482	2220.14	AGTTACTCATTTTCATCTTGAGGTGGCCAATATGGGATGTGGAATTTTTACATGAGTTACACATGTTTGG	0.371429	0.628571	1.64545	1.64635	0.000901408	-12.6	0.395566
main_G3bp1_chr11:55500421-55500491_3947	Mouse 3' UTR GCLiPP Peak	No	chr11:55500421-55500491	G3bp1	4	155	0.972045	153.888	AACTGTGCCTTCTATTTATCTTTGATTCCGGTCGGTCCTGGCAATTGTTTAAAGAAAAGTAATAAAGATT	0.342857	0.657143	1.16341	1.26369	0.100282	-9.5	0.369977
main_Rcc2_chr4:140721189-140721259_18452	Mouse 3' UTR GCLiPP Peak	No	chr4:140721189-140721259	Rcc2	1	67	0.0379004	2.59363	CCGCGCACCCTCTGAGCAGGCCGGCCCTCCCCTCGTGGCAGCTGTCCTTTCCACGTGCACTGGGACCAGA	0.7	0.3	1.09479	1.41856	0.323775	-16.3	0.449458
main_Fbxw11_chr11:32744971-32745041_3559	Mouse 3' UTR GCLiPP Peak	No	chr11:32744971-32745041	Fbxw11	60	3309	1.2107	4091.88	CCGTCGCTCTGACGTGCATAGGAATGTGTCGGACAATGGGCAGATCTGGATTATCTTAGTATTTTTGGAT	0.457143	0.542857	1.09975	1.11749	0.0177465	-13.8	0.684751
main_Ece1_chr4:137963282-137963352_18373	Mouse 3' UTR GCLiPP Peak	No	chr4:137963282-137963352	Ece1	1	12	0.493759	6.05179	GACTATTTTTTAAGCATTATGGAATACACTGGAAATCTTCAGGGAAAATACATTTAAAACACTTTTTTTT	0.257143	0.742857	1.53458	1.54154	0.00695775	-3.7	0.658328
main_Limd2_chr11:106158067-106158137_5441	Mouse 3' UTR GCLiPP Peak	No	chr11:106158067-106158137	Limd2	92	4192	0.731754	3133.1	CTAGAGCCTCAGCTGACAGGGTCGGCAGTAGCTATGCTCCTCCATCTGTTGTGCTGTTCTGTTGTGATCA	0.528571	0.471429	0.496592	0.837408	0.340817	-18.6	0.567017
main_Pla2g12a_chr3:129894992-129895062_16888	Mouse 3' UTR GCLiPP Peak	No	chr3:129894992-129895062	Pla2g12a	91	4619	1.59668	7532.75	ACCATCCTTGCCAAAGATCCGATGCTTTAACAGCCTAATGTTGCCTTAGTTTTGTGTTGACGGGTCATTT	0.428571	0.571429	0.403099	0.551352	0.148254	-10.5	0.526496
rapidmain_Hist1h2ae_chr13:23570647-23570717_6941	Mouse 3' UTR GCLiPP Peak	Yes	chr13:23570647-23570717	Hist1h2ae	2	52	1.35105	71.757	AAGATCTTTCTTCTAATCTCGTAAAAAAAACAAAGGCTCTTTTCAGAGCCATTCACTTAATTCAGTAAAG	0.314286	0.685714	-0.174606	1.663	1.83761	-9.9	0.637178
main_Elp6_chr9:110320915-110320985_26503	Mouse 3' UTR GCLiPP Peak	No	chr9:110320915-110320985	Elp6	27	1464	1.69809	2539.16	CAAAGGAATGTCTCCTGCTGTTCTGTGACCTGATTTGGGACAACTGAAGTGACTTTGGACAGTTAAGAAG	0.442857	0.557143	0.638859	0.906521	0.267662	-14.4	0.525115
main_Sepw1_chr7:15917322-15917392_22238	Mouse 3' UTR GCLiPP Peak	No	chr7:15917322-15917392	Sepw1	20	711	0.14405	104.61	TCTACCCGTGCACGCAGCCTGCCCTGCCCCCCTGCCCTCTTCCCCACCTCTCTCTCTGAATTCCCCCATT	0.642857	0.357143	-0.152718	0.577535	0.730254	-4.1	0.553564
main_Ccnd2_chr6:127128514-127128584_21850	Mouse 3' UTR GCLiPP Peak	No	chr6:127128514-127128584	Ccnd2	12	271	1.14004	315.558	CACATTAACAGTACCTAGCTGTAATGTTTCACGGTGTGCTGCTATTTTAGAAACATTGTTATAATATATT	0.314286	0.685714	1.99983	2.01462	0.0147887	-13.5	0.728789
main_Suz12_chr11:80033394-80033464_4626	Mouse 3' UTR GCLiPP Peak	No	chr11:80033394-80033464	Suz12	17	651	1.62398	1079.81	CTCATGGTGTCTTCAGAGATTTATAAGTGTAAATACTGATTTGGCTGGTCTTTATGATGTGTTTAACTGT	0.342857	0.657143	2.41001	2.41001	0	-8.4	0.401493
main_Cxxc1_chr18:74221249-74221319_12484	Mouse 3' UTR GCLiPP Peak	No	chr18:74221249-74221319	Cxxc1	136	5988	0.924472	5654.1	GAGGCCCTGCATTGCCAGCTGTCCGTTCCTCCATTCATCTGTTTCTTCTGCTGCCCTTAGTTTGATCCTC	0.528571	0.471429	-0.121986	0.713394	0.83538	-6	0.574072
main_Ywhag_chr5:135910408-135910478_20205	Mouse 3' UTR GCLiPP Peak	No	chr5:135910408-135910478	Ywhag	48	1725	1.344	2367.98	AGTTTAAATTACCCAACTCGACAGGCTTAGAGTGGAAGGCACACCTTTTGTTAGTGAGTTAGACGTGGCC	0.457143	0.542857	0.700958	0.988563	0.287606	-12.3	0.489071
main_Cdk2ap1_chr5:124345947-124346017_19990	Mouse 3' UTR GCLiPP Peak	No	chr5:124345947-124346017	Cdk2ap1	5	136	1.54974	215.271	ATTTTTCTACCACAGTCATTAAGCTCTGAACCCACACTCAAAAGATTGGGAGGACATTTTGCAGTAACTG	0.4	0.6	0.345324	0.631521	0.286197	-7.2	0.497583
main_Akr1b3_chr6:34304249-34304319_20701	Mouse 3' UTR GCLiPP Peak	No	chr6:34304249-34304319	Akr1b3	30	923	0.266864	251.582	ACCCCTTCCACGCCGAAGTCTGAAGCTGTGGCGAGCAGATCCCTGCTCCTCCTCAAGTGGCTTGCACCTG	0.614286	0.385714	0.32538	0.942197	0.616817	-18.8	0.445997
main_Stard4_chr18:33201903-33201973_12042	Mouse 3' UTR GCLiPP Peak	No	chr18:33201903-33201973	Stard4	16	676	1.58395	1093.65	CAGCAATAGGGAAAGAAAATGGACTTGAGAGTGTCCGGTGAAGGCTGTGAATTGTTAACTATCCAGTGTG	0.442857	0.557143	0.234493	0.591394	0.356901	-10.8	0.666999
main_Tmsb4x_chrX:167207177-167207247_27333	Mouse 3' UTR GCLiPP Peak	No	chrX:167207177-167207247	Tmsb4x	12	237	2.80362	678.665	GATGATGAAATAGAGAGGAAAATTCAAGATGGTCAAAGATGTCCTGCAGGATGTAAAATGCAGTTTAATC	0.357143	0.642857	0.965225	1.06489	0.099662	-7.2	0.432715
main_Ly6e_chr15:74959055-74959125_8858	Mouse 3' UTR GCLiPP Peak	No	chr15:74959055-74959125	Ly6e	18	373	1.65431	630.251	GTATCCCTGTGTGAATGAAGCCACTTGGATTCTGGGGTGGGCAAAGAAGACCTGAAAAGATTCTACAGCA	0.471429	0.528571	-0.118775	0.589732	0.708507	-11.6	0.53141
main_Myl12b_chr17:70974235-70974305_11720	Mouse 3' UTR GCLiPP Peak	No	chr17:70974235-70974305	Myl12b	121	4882	0.533145	2658.47	ACGCCTCTTGCGTTTGCTTGCTCACTTCCTGTCTCAGACACACACACCCCATAGGACCTACTGCGTGCCA	0.557143	0.442857	0.135437	0.719465	0.584028	-10.5	0.373587
main_Plaa_chr4:94567987-94568057_17544	Mouse 3' UTR GCLiPP Peak	No	chr4:94567987-94568057	Plaa	19	765	2.41983	1890.75	TACTAGGATTAAAGCCACCACTCCCAGCTCAGTCCCTTTTCTTAAGAAGTGTACTTATATTGGTATGTGT	0.4	0.6	0.122056	0.550423	0.428366	-8.2	0.651988
main_Txndc5_chr13:38500338-38500408_7061	Mouse 3' UTR GCLiPP Peak	No	chr13:38500338-38500408	Txndc5	109	5595	0.843266	4818.96	ACAGCTGTCCTTGGAAACCAGTTCTGTTGGCCCAGCTCACAGTGGCTTCAGCTTAGCATCATGGTCTTAT	0.5	0.5	0.820704	1.0382	0.217493	-13.4	0.554559
main_Trub2_chr2:29776126-29776196_13930	Mouse 3' UTR GCLiPP Peak	No	chr2:29776126-29776196	Trub2	28	926	0.762347	721.028	GGGATGGTGTTCACTCAGTGGTGCCGGTGGAAGGCGTGGTGCAGAGAAGACATCGGGTTTATAAAATACA	0.514286	0.485714	-0.105563	0.466493	0.572056	-14.4	0.577087
main_Ptms_chr6:124914018-124914088_21756	Mouse 3' UTR GCLiPP Peak	No	chr6:124914018-124914088	Ptms	27	628	0.521614	334.578	GCTCTGGCCCTGCCCCAGAGCTGTGACCCTTGTCCTTTGACCCAGCCTCTCATTTCCATCTCTCCAGACA	0.585714	0.414286	0.849479	0.959592	0.110113	-13.4	0.57461
main_Fam168b_chr1:34816245-34816315_101	Mouse 3' UTR GCLiPP Peak	No	chr1:34816245-34816315	Fam168b	10	387	3.52794	1394.51	GTTCCTCATGTTTCTTGTAGAGAAGCAGGGCTGTGATGATGTGTAAAAATGTAGAAATAATGTAGCTTGT	0.371429	0.628571	0.40269	0.722831	0.320141	-8.9	0.649793
main_Sft2d2_chr1:165178710-165178780_1335	Mouse 3' UTR GCLiPP Peak	No	chr1:165178710-165178780	Sft2d2	37	2000	0.651761	1331.39	CCTGCCCGGGATACATTGTTCCTTTCCCTGCATGGCACCGTCTTGCTATTCTGAACTCAGCTGGCTATGA	0.528571	0.471429	-0.149535	0.691197	0.840732	-13.5	0.711888
main_Atp13a3_chr16:30313811-30313881_10193	Mouse 3' UTR GCLiPP Peak	No	chr16:30313811-30313881	Atp13a3	2	72	0.505515	37.1753	GATTCTATGAAGCTATGCATCTTAGACCTCTTGAGCTGTGAATTAGCACTATTTTCTATGGTTACTTATT	0.342857	0.657143	1.835	1.88554	0.0505352	-9.4	0.430112
main_Srsf9_chr5:115332915-115332985_19697	Mouse 3' UTR GCLiPP Peak	No	chr5:115332915-115332985	Srsf9	41	1299	1.26804	1682.4	TTAGGCTGCAGAGAGAAGGTGTGTCTGTGGTTCAGGAACAAGCTGTACATTTTTCACCCTGACTATGGGA	0.471429	0.528571	1.66027	1.66027	0	-14.8	0.394236
main_Cap1_chr4:122859094-122859164_17812	Mouse 3' UTR GCLiPP Peak	No	chr4:122859094-122859164	Cap1	15	776	2.11938	1679.81	AGGAAGAAAGATTGTCCTGTGACTTCTGCCCATTACCTGAGGCCTGTGGAAATAAACCTTTATGTACTTA	0.414286	0.585714	1.94196	1.94196	0	-7.8	0.537207
main_Mrps24_chr11:5704329-5704399_3299	Mouse 3' UTR GCLiPP Peak	No	chr11:5704329-5704399	Mrps24	56	2962	0.769858	2329.08	GACCAAATGCCTGTTCTCTGAGGTGGAGGCGTCAGCTCCAAGCTGCTGTTGAATAAAACCCTGATCATGT	0.5	0.5	-0.00633803	0.794958	0.801296	-13.4	0.692664
main_Cdk2ap2_chr19:4098884-4098954_12614	Mouse 3' UTR GCLiPP Peak	No	chr19:4098884-4098954	Cdk2ap2	29	1051	0.753826	809.211	CCTGCCTCTTCAACAGGAGTGCAGAAGACCTTCCTGCCTCATCTCTGGGGCCACAGCCGACTCTTTTTTT	0.542857	0.457143	0.613099	0.873831	0.260732	-18.2	0.591435
main_Rara_chr11:98973997-98974067_5146	Mouse 3' UTR GCLiPP Peak	No	chr11:98973997-98974067	Rara	41	2250	0.8171	1877.79	TGGATGGTGACAGAGGGTGCCCAGGGTGGGGGAGACTCCCTGTACATATCCTGCGTACCAATCCCCAGAT	0.585714	0.414286	1.41418	1.66308	0.248901	-23.8	0.58456
main_Pygo2_chr3:89433757-89433827_16328	Mouse 3' UTR GCLiPP Peak	No	chr3:89433757-89433827	Pygo2	24	1158	0.731684	865.407	GGAAGCTAAAGCCTGGTTGAGCAGAGCCATTCCTAGAGTCTAACCAGAGGCTGCAAGAGAAAATGGGCTG	0.514286	0.485714	0.638028	0.918085	0.280056	-15.1	0.598079
main_Gna13_chr11:109397165-109397235_5492	Mouse 3' UTR GCLiPP Peak	No	chr11:109397165-109397235	Gna13	152	9677	1.25773	12431.2	CGGTCACAAATGGTACATGTGCTATGTTGATCTGAGATGAGCAGTGACACGCAGTTTCCTTTGCCATACA	0.457143	0.542857	-0.0162958	0.697141	0.713437	-14.2	0.555396
main_Tgoln1_chr6:72610440-72610510_21104	Mouse 3' UTR GCLiPP Peak	No	chr6:72610440-72610510	Tgoln1	35	1377	0.999504	1405.75	GTTGCTTTGACTGTCTCAATAAATCCATCCATTCTTTATCCTCTCTGTGACGCTCATGTTTTTTTTGGCC	0.4	0.6	0.0884225	0.578254	0.489831	-4.1	0.723224
main_Nxf1_chr19:8765612-8765682_12956	Mouse 3' UTR GCLiPP Peak	No	chr19:8765612-8765682	Nxf1	23	573	0.924736	541.203	TGCTGTGAACTGGGCCTTTCCTGGAGAAGAAATCTGGGTTTCCCTAAGATGTGATCAAAGCCGGGGCCCC	0.542857	0.457143	1.26662	1.34651	0.0798873	-18	0.575834
main_Mcl1_chr3:95661360-95661430_16551	Mouse 3' UTR GCLiPP Peak	No	chr3:95661360-95661430	Mcl1	15	708	1.20032	868	CCCAAGTGCTCAGGACTTTTAGCCCTGTCTACTTTGGCTTGGTTTGGATGATTCTTAAGTTTATTAGCCT	0.428571	0.571429	0.350873	0.520873	0.17	-13.8	0.538782
main_Cox14_chr15:99727918-99727988_9667	Mouse 3' UTR GCLiPP Peak	No	chr15:99727918-99727988	Cox14	42	2404	0.728843	1789.6	TGCTGGGCTAAAATGCCTTGGTTTCTGTAGTGCTACTAGCTTGTGCCGTTCTGACAGTTTATGGAGGCCA	0.485714	0.514286	0.226746	0.56562	0.338873	-17.4	0.586988
main_Edem1_chr6:108856030-108856100_21517	Mouse 3' UTR GCLiPP Peak	No	chr6:108856030-108856100	Edem1	15	527	0.740437	398.554	GTCCCCACGATAGCCAGCTGTCAGCGTGGATCACGTGGGGGAAATTCACCTGGTTTATTTGCATCCTAAA	0.514286	0.485714	-0.266	0.614535	0.880535	-20.2	0.820329
main_Anxa11_chr14:25886326-25886396_7766	Mouse 3' UTR GCLiPP Peak	No	chr14:25886326-25886396	Anxa11	77	4063	0.701654	2911.78	CTCTCCGGTTCCTGCACTCACTCCTTGTTGCTTGTGGCTAAGACTCTTAGCTTCGTGGTAGACATGCGAT	0.514286	0.485714	0.22762	0.581338	0.353718	-12.5	0.476732
main_Eif4b_chr15:102095314-102095384_9727	Mouse 3' UTR GCLiPP Peak	No	chr15:102095314-102095384	Eif4b	44	1753	0.502651	899.988	CGACGACTGCACTGAGTAGGACCTCCGCACCCTGTGCTTTCTCCTAGTCTCCACCCCGGAACATTCAAGA	0.571429	0.428571	1.19825	1.31031	0.112056	-14	0.52485
main_Copz1_chr15:103298735-103298805_9823	Mouse 3' UTR GCLiPP Peak	No	chr15:103298735-103298805	Copz1	36	1645	0.75794	1273.47	GGTGAAAGTGTTCTGAGCCCAGTTCCTTGCCCCTCAAAACCCACATCTGCTGTGACTTCTTATCCAGGCC	0.528571	0.471429	0.942113	1.03566	0.0935493	-8.4	0.530292
main_Phf12_chr11:78030284-78030354_4529	Mouse 3' UTR GCLiPP Peak	No	chr11:78030284-78030354	Phf12	10	277	2.97936	842.928	GATGGCATTTTTTCAATGTTTTTAAAAGCTGTGTACAGTACATGTGGTAGAGTGTTTCTCAAATTGTCTA	0.328571	0.671429	1.78908	1.79018	0.00109859	-11.1	0.502538
main_Ip6k1_chr9:108046006-108046076_26396	Mouse 3' UTR GCLiPP Peak	No	chr9:108046006-108046076	Ip6k1	41	1759	1.15105	2067.98	ACCCACAGGCAGGGACCATTGCTCTGAACTTGCTGTGAGGACACACAGACTTGCTTTTAAAGGGTTATAT	0.471429	0.528571	1.99377	2.11042	0.116648	-15.5	0.550598
main_Cebpg_chr7:35049207-35049277_22676	Mouse 3' UTR GCLiPP Peak	No	chr7:35049207-35049277	Cebpg	11	459	1.17285	549.849	TTTTAAAGGTAAAGTGTTCGTGTGTGTGTGCTTGTGTGAAGAGGCACCTTTTGTTGTTTGATCTCAACTG	0.4	0.6	0.331141	0.533423	0.202282	-10.3	0.655603
main_Ankrd28_chr14:31701668-31701738_7852	Mouse 3' UTR GCLiPP Peak	No	chr14:31701668-31701738	Ankrd28	27	1145	1.60344	1875.19	GGGACACTGCTCCCTGACCTGCTTACATGGGCAACACTGCTGTAAAGAAAGAGATCAAAACACTAGATTA	0.457143	0.542857	1.08594	1.14975	0.0638028	-10.7	0.639159
main_Metap2_chr10:93861058-93861128_2740	Mouse 3' UTR GCLiPP Peak	No	chr10:93861058-93861128	Metap2	20	842	2.21764	1907.18	ATGCTGTACTGCTCACTAGTTAGGAATTACTCACACGTTTTGTTTTGAAGACCTAAGAGATGCTTTTTGG	0.385714	0.614286	1.32438	1.44762	0.123239	-7	0.375166
rapidmain_Qdpr_chr5:45434296-45434366_19199	Mouse 3' UTR GCLiPP Peak	Yes	chr5:45434296-45434366	Qdpr	39	2357	1.0515	2531.38	TCCAGGGAGGTATATGGACAGGCCTGCATCACAGCATCCTAGACTTCTTTGGAGACCCGTTTGATAGTAC	0.5	0.5	-0.587338	0.878155	1.46549	-18.5	0.468293
main_Eif2s2_chr2:154872522-154872592_15317	Mouse 3' UTR GCLiPP Peak	No	chr2:154872522-154872592	Eif2s2	22	989	1.90856	1927.93	GAAATACCTTGCAAGATACCGATATTCAAGCTGTTGACATACTCGTTGCCTACTTTAACAACTGTCAGAG	0.4	0.6	1.82904	1.82904	0	-5.9	0.41297
main_Chp1_chr2:119585549-119585619_14832	Mouse 3' UTR GCLiPP Peak	No	chr2:119585549-119585619	Chp1	98	5550	1.5631	8860.69	TTGTCCTTGTGTCTGTTACTTCCTACCTCTCAGTCATCCAACCTTCTCTCCATTCAGTTTTTCAGCTGCC	0.457143	0.542857	0.0633521	0.387042	0.32369	-5.3	0.614422
main_Tspan13_chr12:36015098-36015168_6090	Mouse 3' UTR GCLiPP Peak	No	chr12:36015098-36015168	Tspan13	20	996	2.35406	2394.78	CTAGTAGTCTGTCAGGATTGCATCCCTGTGTTCTAGAAATAGCTGTGTCTTTAGGAAAATGAAATTTAGT	0.371429	0.628571	0.67869	0.885479	0.206789	-11.2	0.531947
main_Ppig_chr2:69750360-69750430_14347	Mouse 3' UTR GCLiPP Peak	No	chr2:69750360-69750430	Ppig	26	1149	2.46419	2891.89	AGATGAAGACAAAAGTGGATGAGTGAGTTGTGTACTCTTAATTCCTTCCTGTCTCAAATTTTCAGTTTTT	0.342857	0.657143	1.75761	1.80366	0.0460563	-12.6	0.444736
main_Srpk1_chr17:28588760-28588830_10947	Mouse 3' UTR GCLiPP Peak	No	chr17:28588760-28588830	Srpk1	17	638	0.563853	367.43	CAGAGGCCTTTGAGATCCTGGGTGAGGAGCCAAGGGGAGGAGAGGCTGGCACTTTTCTCAATCGTTTTCC	0.557143	0.442857	0.453324	0.712563	0.259239	-21.5	0.6028
main_Sh3bgrl3_chr4:134127640-134127710_18234	Mouse 3' UTR GCLiPP Peak	No	chr4:134127640-134127710	Sh3bgrl3	44	1270	0.67049	869.729	GCTCTTCACCAGGCCTTGTAACCAACTCCTTGTCGTCCTAATCTGCAAACCCAGACCCAGACCCTTTCCG	0.542857	0.457143	0.482239	0.613592	0.131352	-7.8	0.521294
main_Fnbp4_chr2:90779632-90779702_14520	Mouse 3' UTR GCLiPP Peak	No	chr2:90779632-90779702	Fnbp4	15	538	1.79673	987.307	AATGGCTCCCAGCACATAGTTTTCATTTTGTTTTATGTTCAGTCTTAACCAGATTTAAACTGTTGTCAAA	0.328571	0.671429	0.921408	1.21301	0.291606	-7.7	0.496342
main_Marcks_chr10:37135816-37135886_1860	Mouse 3' UTR GCLiPP Peak	No	chr10:37135816-37135886	Marcks	42	1364	0.807348	1124.77	GACAGGCCGAGGACGTGTTAGACAGCTTCCTCTGCCTTCTTTCTTTACTTTTACTTTTTTTTTTTTTTTT	0.371429	0.628571	0.994958	1.19434	0.19938	-15.9	0.633401
main_Ywhaz_chr15:36771571-36771641_8599	Mouse 3' UTR GCLiPP Peak	No	chr15:36771571-36771641	Ywhaz	11	391	2.11286	843.793	CCAAAGGAAATTGTCTCCTTATTCCCTCTTGGCAGCTAATGGGCTTTTACCAATTTTGAATGCAGAGTTT	0.4	0.6	1.73486	1.74666	0.0118028	-11.3	0.442236
main_Eif4e_chr3:138556069-138556139_16971	Mouse 3' UTR GCLiPP Peak	No	chr3:138556069-138556139	Eif4e	5	146	1.25227	186.741	TTGTTTTTTTCCTCGTGTAACATTGGTGAAGGATCCAGGAATATGACAGAAAGGTGGAATAAACATTAAA	0.342857	0.657143	2.12601	2.13297	0.00695775	-10.8	0.367417
main_Pak2_chr16:32019291-32019361_10227	Mouse 3' UTR GCLiPP Peak	No	chr16:32019291-32019361	Pak2	66	2947	0.811977	2444.06	GCTTGTTGACGCGGGCTGTGTGACTTTGGTGCCACTCCCTTCCTGTGTTTCCTTGGAAATAAGTGTCTGT	0.514286	0.485714	0.80362	1.05238	0.248761	-16.1	0.583791
main_Eif2s2_chr2:154872637-154872707_15318	Mouse 3' UTR GCLiPP Peak	No	chr2:154872637-154872707	Eif2s2	2	46	1.47208	69.1634	ATTTTTCCAAAATGTGTTGGAGATTTGGCTGGACAGGTTACCATCAGAGTGGATGTACCATTGAGTTAAA	0.385714	0.614286	1.47583	1.5167	0.0408732	-16.6	0.430104
main_Marcksl1_chr4:129515750-129515820_18015	Mouse 3' UTR GCLiPP Peak	No	chr4:129515750-129515820	Marcksl1	19	1477	1.29517	1953.86	AACCATGTCTCTGACTTGATAAGCAAGTGTTAGGCTTCAGGAGGGAGGGAGGTCTGTAATGTGAAACAAC	0.457143	0.542857	1.89235	1.89703	0.00467606	-15.9	0.493432
main_Metap2_chr10:93861277-93861347_2742	Mouse 3' UTR GCLiPP Peak	No	chr10:93861277-93861347	Metap2	15	442	2.06057	930.247	CTTAGTCCAAAGCCAACTCAACGTCTTTATTTTCTAAGCTTTGTTGGAACACATTATACCACAAGTAATT	0.342857	0.657143	1.72486	1.75596	0.0310986	-4.9	0.402347
main_Mat2a_chr6:72433876-72433946_21080	Mouse 3' UTR GCLiPP Peak	No	chr6:72433876-72433946	Mat2a	40	2634	1.81018	4869.97	AGATGCTGAAAACATCCTTGTAGTGTGCACGTAAAGTACTTGTAGTTTGACTGTAGACTCTGGCAATGCC	0.428571	0.571429	1.73721	1.7682	0.0309859	-10.2	0.377517
main_Ube2e1_chr14:18283056-18283126_7670	Mouse 3' UTR GCLiPP Peak	No	chr14:18283056-18283126	Ube2e1	12	472	2.2793	1098.83	CTGACTTTTAGTACAAAAGAAAGCATGTGTAGATACTTGTGTTCCATTGATCAGCTTAAATTTGTATAGG	0.328571	0.671429	0.997141	1.04669	0.0495493	-8	0.457245
main_Dnaja2_chr8:85539081-85539151_24593	Mouse 3' UTR GCLiPP Peak	No	chr8:85539081-85539151	Dnaja2	18	590	2.41882	1457.62	ACCTGATAAGTCCAGATGGACTGATGGACATCTGTTGATCTATGTGTAACTTCTAAAATTGGTATCGTAT	0.371429	0.628571	1.73042	1.74738	0.0169577	-11.6	0.475184
main_Atmin_chr8:116958241-116958311_24997	Mouse 3' UTR GCLiPP Peak	No	chr8:116958241-116958311	Atmin	5	217	0.959563	212.677	CTGAAATGTCGCCTATGTTTGCTCCTGTGTAGCTATTCTATCTTTTTTTAAAAAAAAATGCATTTGACAC	0.328571	0.671429	0.331817	0.606352	0.274535	-4	0.610037
main_Kpnb1_chr11:97162019-97162089_4964	Mouse 3' UTR GCLiPP Peak	No	chr11:97162019-97162089	Kpnb1	7	249	1.43114	363.972	CAAAGGGGTTTGATGTTGCATTTCATAAACTAACTGAAGTTCTGGCTACTGATGCAGCACAAGAGACGTG	0.428571	0.571429	1.92685	1.99586	0.0690141	-13.1	0.384836
rapidmain_Ago2_chr15:73105756-73105826_8831	Mouse 3' UTR GCLiPP Peak	Yes	chr15:73105756-73105826	Ago2	43	1505	0.28346	435.729	TGCGCTTGCCAGTAACCTGCCGTCCTCCCTGCCTCGTCCATGTGTGTCGCTCAGCCGATGAAGCACAAAT	0.585714	0.414286	-0.00707042	1.07707	1.08414	-9.6	0.721299
main_Tmem183a_chr1:134347044-134347114_1037	Mouse 3' UTR GCLiPP Peak	No	chr1:134347044-134347114	Tmem183a	3	115	1.19238	140.056	TCTTTCAGATAGCTATGCATTAACTGAAAGGTAAGGCAGAGTTTAGGAAAATTGTGTTTACATTAAATTG	0.314286	0.685714	0.0984085	0.598324	0.499915	-13.4	0.557458
main_Gfm1_chr3:67474957-67475027_16164	Mouse 3' UTR GCLiPP Peak	No	chr3:67474957-67475027	Gfm1	6	173	2.40233	424.49	CCCACGTTCAGGAGCTTCTGTATGTACGCCAAGGATAACTGTGTATTTAAACTGTATTGACTATTTTTAT	0.371429	0.628571	0.240197	0.581549	0.341352	-7	0.496119
main_Dbi_chr1:120113311-120113381_793	Mouse 3' UTR GCLiPP Peak	No	chr1:120113311-120113381	Dbi	31	1540	1.64727	2591.03	GGCTGTGATACATTAGGGCCAGCGTTAACCTCTGCTCCTCCTCCCTCTGTAGTTTTTACCTACAATCAAT	0.471429	0.528571	0.250155	0.838831	0.588676	-13	0.557657
main_Klf13_chr7:63891099-63891169_22875	Mouse 3' UTR GCLiPP Peak	No	chr7:63891099-63891169	Klf13	45	2302	1.19833	2817.54	GAGGTTTAGGATTACATTGGGGCAGAACAGGACAGCTGGAGACAGTGATGTGGTGTTTTTGCAGAAGACC	0.485714	0.514286	-0.163761	0.542352	0.706113	-12.4	0.711461
main_Csde1_chr3:103057268-103057338_16661	Mouse 3' UTR GCLiPP Peak	No	chr3:103057268-103057338	Csde1	21	803	1.46204	1199.12	TTGTTGGCCCTATGAAATTCTGCACTCTAGTCAGTATATACTCTACCTTCATGACTTAACACTCAGCTGC	0.414286	0.585714	1.72946	1.76034	0.0308732	-4.8	0.510393
rapidmain_Spint2_chr7:29256472-29256542_22584	Mouse 3' UTR GCLiPP Peak	Yes	chr7:29256472-29256542	Spint2	72	2711	0.655986	1816.4	TTGACCCTGTCCTCCCACAGCTCCCCTGCCCTTCCCCATCGCCTGTCTCCTCTAACATCACTAGGAAGGA	0.585714	0.414286	-0.507169	0.810662	1.31783	-9.5	0.519302
main_Ftl1_chr7:45458018-45458088_22763	Mouse 3' UTR GCLiPP Peak	No	chr7:45458018-45458088	Ftl1	24	435	0.391115	173.773	AAGGGGCTCCCCCCTCTGCTCTGCACCAGCCCGCCCTGGGACCTCCACCTGAATGAACCTCTCAAGCCAC	0.657143	0.342857	-0.00816901	0.571718	0.579887	-12.4	0.594899
main_Srsf5_chr12:80950081-80950151_6328	Mouse 3' UTR GCLiPP Peak	No	chr12:80950081-80950151	Srsf5	44	2095	0.803212	1718.71	GGATTTGGAGGGGGTTGGGCTGGATTTCTTTGTAGATGTGGACCACCAAGGGGTTGTTGAAAACTAATTG	0.471429	0.528571	1.82711	1.88886	0.0617465	-11.3	0.447542
main_Szrd1_chr4:141115584-141115654_18537	Mouse 3' UTR GCLiPP Peak	No	chr4:141115584-141115654	Szrd1	81	3039	0.725006	2250.4	GACTTACTTGCACTGTGATCCCCCTTGCTCCGCCCACTGTGACCTTGAACCCCATGCACTGTGACCTCTG	0.571429	0.428571	2.39849	2.41951	0.0210141	-6.3	0.496109
cd8_Gatad2a_chr8:69909061-69909131_11936	Mouse 3' UTR GCLiPP Peak	No	chr8:69909061-69909131	Gatad2a	1	17	1.19498	20.749	CACTGTGCTGGAGCCAGAGCTGGTTGCTGGGTTACTTTTTGTGGTTTATTTTATTAAAAATTTCTATCCT	0.385714	0.614286	0.410338	0.790394	0.380056	-9.5	0.644745
main_Sod2_chr17:13015231-13015301_10668	Mouse 3' UTR GCLiPP Peak	No	chr17:13015231-13015301	Sod2	19	560	1.73219	990.765	ATTGCAGCACTATGACTGGGGTGCTGTAGTCTTTATTGATGTCTTTCCACATACCTGATAATTCTATGAT	0.385714	0.614286	0.167268	0.505324	0.338056	-15.4	0.531659
main_Hmga1-rs1_chr17:27563196-27563266_10881	Mouse 3' UTR GCLiPP Peak	No	chr17:27563196-27563266	Hmga1-rs1	34	1138	0.152479	177.231	CCGCAGGGCACTAAGGAGCTAGCCTTGCCGCCCCCTCCTTTTCGCTCCTCCCTGCCCCCCATGGTTCTGG	0.671429	0.328571	0.675437	1.07792	0.402479	-18.7	0.596392
main_Rbms1_chr2:60752085-60752155_14327	Mouse 3' UTR GCLiPP Peak	No	chr2:60752085-60752155	Rbms1	15	462	1.38326	652.729	AAGTGCAAGGAGGGAAAACTGTTTTGTGTGAAACACATTTTCTGACTGGGGGGACTTTTAATAGGGTAAA	0.4	0.6	2.06652	2.08858	0.0220563	-11.4	0.5833
main_Psmd9_chr5:123248423-123248493_19950	Mouse 3' UTR GCLiPP Peak	No	chr5:123248423-123248493	Psmd9	48	1515	0.784427	1213.82	GAGAAGAATGGTCGAAGCCTGGGCATCGAGGTGGAAGAGACGCTTTGGCTGCCTGATGTAATCTCTCTGG	0.542857	0.457143	0.113958	0.66531	0.551352	-20.2	0.631541
main_Sept11_chr5:93171790-93171860_19423	Mouse 3' UTR GCLiPP Peak	No	chr5:93171790-93171860	2019-09-11	37	1514	0.689343	1065.98	CTTCTTCACACTTGCCACAAGCCAGCGGTGGGCTGGAAAGTAGGCAGAAACTTGAGTGAGCATCCGAGAT	0.528571	0.471429	0.0428732	0.776958	0.734085	-18.4	0.526241
main_Lsm12_chr11:102163391-102163461_5332	Mouse 3' UTR GCLiPP Peak	No	chr11:102163391-102163461	Lsm12	15	631	1.41119	909.498	CTTGCAGGTCTCTTTTTACTAGATCATGGCCACTCTTCCCACCTCATTCCTCTGAAAACAAAAATGTGTT	0.414286	0.585714	1.6973	1.81963	0.122338	-4.2	0.518693
main_Pak2_chr16:32019602-32019672_10229	Mouse 3' UTR GCLiPP Peak	No	chr16:32019602-32019672	Pak2	35	1466	0.901872	1350.41	CATGCTTAGCTTCCTATAGAAGTCAGGACCGGCTGGTGTGCGGAGTGTTTCAGTTCAGAGCCTAAACTGA	0.5	0.5	1.00825	1.16873	0.160479	-15.1	0.441678
main_Ago2_chr15:73103599-73103669_8822	Mouse 3' UTR GCLiPP Peak	No	chr15:73103599-73103669	Ago2	117	5042	0.845268	4352.97	CTCACATGCACACTTGATACCACTTTGGGTCTGCTCTGCCTTCTCCAGATTTGGCCTCTTGGCCACTCCT	0.528571	0.471429	-0.209394	0.646211	0.855606	-16.2	0.660331
main_Ddx21_chr10:62581690-62581760_2091	Mouse 3' UTR GCLiPP Peak	No	chr10:62581690-62581760	Ddx21	36	1385	0.764549	1081.54	GCCCGGCTCTGGGTGTTGAGCGTAGAACAGACAGCAGATTCACTCCAGTGTCTTCACACACTCATTAGGT	0.528571	0.471429	-0.117028	0.529563	0.646592	-14.8	0.440843
main_Dnajc14_chr10:128817423-128817493_3169	Mouse 3' UTR GCLiPP Peak	No	chr10:128817423-128817493	Dnajc14	15	638	2.14662	1398.83	TCCTTCCTCAAATCAATGTCAGGGAGTCAAAAGGGCTGTGTACAGCACAGGATGGAATTTGATTTATTTT	0.4	0.6	1.71676	1.72397	0.00721127	-12.5	0.692106
main_Ptp4a2_chr4:129848745-129848815_18062	Mouse 3' UTR GCLiPP Peak	No	chr4:129848745-129848815	Ptp4a2	11	340	2.53186	879.239	TGGATTGTGGATCTGCTATCTAACAATGTCATGGAAAAGTGGTATCTTAAAATTTTAGGACCGATTTCAG	0.357143	0.642857	0.774972	0.854239	0.0792676	-10.6	0.465024
main_Yeats4_chr10:117215429-117215499_2877	Mouse 3' UTR GCLiPP Peak	No	chr10:117215429-117215499	Yeats4	66	3971	1.73573	7039.97	GTGCTCTAAGACTCGATGCTGGGTAGCATTCCACGACGTTAAGCACAACTTTTAAAGTGTTTGTTTTGTT	0.414286	0.585714	0.544451	0.895634	0.351183	-12.2	0.471064
main_Mob1a_chr6:83340482-83340552_21171	Mouse 3' UTR GCLiPP Peak	No	chr6:83340482-83340552	Mob1a	24	837	2.60911	2230.52	TCCTTCTTTGTCTTAGCCCATGACTAACCTGTAGTTTGTTGCTGAGCTTTGTTTAAGAAAATGATTTTTC	0.357143	0.642857	0.43393	0.637817	0.203887	-10.7	0.693498
main_Set_chr2:30071111-30071181_13957	Mouse 3' UTR GCLiPP Peak	No	chr2:30071111-30071181	Set	17	479	1.4826	725.351	CTTGAGCAAAATACAACAGGAAAAGAATCTCCGTTTCTGTTCTTAATTCATTTTTTATCCTTTCTTGTCT	0.314286	0.685714	1.21454	1.25859	0.0440563	-6.5	0.49642
main_Rbms1_chr2:60751771-60751841_14325	Mouse 3' UTR GCLiPP Peak	No	chr2:60751771-60751841	Rbms1	21	803	0.810604	664.833	GCTTGAGATCTGAGAAACCGATGGCGGGGGGGAAAATGGGGTTGCTGTTGAAACTAGATGGTGAAAGCTA	0.5	0.5	0.972521	1.25773	0.285211	-12.6	0.532311
main_Cox19_chr5:139338015-139338085_20317	Mouse 3' UTR GCLiPP Peak	No	chr5:139338015-139338085	Cox19	30	1041	0.490303	521.319	GTCTGTGTGTCACAGGACCCGTCAGGACTGAACCCTGCTGTGATTTGATATCCCGCCCAGAGTGGCTGTC	0.571429	0.428571	-0.20907	0.559859	0.76893	-15	0.603882
th2_Prps2_chrX:167346959-167347029_14371	Mouse 3' UTR GCLiPP Peak	No	chrX:167346959-167347029	Prps2	49	2097	1.11971	2398.24	GTGTGTGTGTGTGTGTGTGTGTGTGTGTGTGTGTGTGTGTGTACATGTCCCAAAGCATTGGCATGACAAA	0.471429	0.528571	NA	NA	NA	-9.9	0.494581
main_Exosc2_chr2:31680791-31680861_14092	Mouse 3' UTR GCLiPP Peak	No	chr2:31680791-31680861	Exosc2	11	314	1.7468	560.223	CCCGGCCTGATGCTGACTTACCTTGGAATAACTTGGAGAATTTATGACTTCCAATCACCCCACACAATGT	0.457143	0.542857	0.137113	0.582324	0.445211	-8.5	0.491611
main_Smndc1_chr19:53379725-53379795_13508	Mouse 3' UTR GCLiPP Peak	No	chr19:53379725-53379795	Smndc1	27	1239	1.68469	2131.96	CCATTTTTGGGATGTGTACTGTTTCTATGGGAAGACAAAAGCTGATGTACAGCCCTGTGTACAGTGTAGA	0.428571	0.571429	1.91808	1.91854	0.000450704	-14.1	0.405642
main_Ogt_chrX:101683170-101683240_27140	Mouse 3' UTR GCLiPP Peak	No	chrX:101683170-101683240	Ogt	14	436	1.28131	570.598	TCACCAGTGTTTCAGCCCTTGACTGCCCCTCCTATGCTGCTTCCAAAAGTAATAGTGTGATAAGATTTTT	0.428571	0.571429	1.56223	1.56927	0.00704225	-6.1	0.542083
main_Fbxl14_chr6:119482319-119482389_21620	Mouse 3' UTR GCLiPP Peak	No	chr6:119482319-119482389	Fbxl14	4	87	3.162	280.976	TAAATGGAGGAATAGATGACTTTATTTTGGTGGGGGGTTGGGACTGTGGCTTTAAAACAAATCGCTTTTG	0.4	0.6	1.62783	1.66279	0.0349577	-8.4	0.591701
main_Eif5_chr12:111545410-111545480_6662	Mouse 3' UTR GCLiPP Peak	No	chr12:111545410-111545480	Eif5	12	310	2.17891	689.905	AATCGTAAGCTCTGATTCTATTTGGGAGAAACAGGAAAAAAGGTGCACTTAATCTCTAGCTAAAACAGCG	0.385714	0.614286	0.61369	0.756338	0.142648	-7.1	0.512208
main_Dnaja1_chr4:40733197-40733267_17224	Mouse 3' UTR GCLiPP Peak	No	chr4:40733197-40733267	Dnaja1	33	1707	2.86908	5002.24	AGGTCATATCTTGTGTAACTGATAATAGCTGTGTACATTAGACTGACATGCTAGGTATGTGTTGTATGAC	0.371429	0.628571	1.07634	1.16206	0.0857183	-12.6	0.527316
main_Arf3_chr15:98740145-98740215_9604	Mouse 3' UTR GCLiPP Peak	No	chr15:98740145-98740215	Arf3	85	2501	0.319489	816.128	CATGCCCAGCAAGCGCCTTGCCTTCCTCCTCCTCCTCCTCCTCCCTCCTCCCTCCTCCCTCCCTGTACAC	0.657143	0.342857	0.613451	0.740352	0.126901	-4.1	0.666238
main_Wnk1_chr6:119925080-119925150_21629	Mouse 3' UTR GCLiPP Peak	No	chr6:119925080-119925150	Wnk1	4	86	1.85036	162.534	GCTTGGCCAGTGAACAAACGAGATCTAGAAGAGATTAAACAAAAAGAGGGGAGTGGGCTAGATTTTAAGT	0.414286	0.585714	0.414408	0.80869	0.394282	-7.6	0.514126
main_R3hdm4_chr10:79910476-79910546_2297	Mouse 3' UTR GCLiPP Peak	No	chr10:79910476-79910546	R3hdm4	30	658	0.867026	582.701	TGGCTGGTCCTCTCTCTAGGACTCTGCAGACCTCCCCAGGACACTTTCTTGTGTGTGTGTGTGTGTGTGT	0.542857	0.457143	0.104254	0.521099	0.416845	-15.5	0.537744
main_Rnf149_chr1:39551343-39551413_171	Mouse 3' UTR GCLiPP Peak	No	chr1:39551343-39551413	Rnf149	3	66	2.84713	191.928	TAAATTCTGTATAGTGCTTAGATACATACTTTGAAGAGCAAGGAGTCCATTGTTGTTGATTCTAAACTTG	0.328571	0.671429	-0.0476056	0.587465	0.63507	-7.6	0.40399
main_Got1_chr19:43500326-43500396_13336	Mouse 3' UTR GCLiPP Peak	No	chr19:43500326-43500396	Got1	73	2868	0.69504	2036	CCACCAAAGCAGTTCTTGTCACACCTTTCCTGCCTGCGCAAACCTAGCTGTACCTAGCTGTACACGTCCT	0.528571	0.471429	0.555915	0.821831	0.265915	-9.1	0.42548
main_Celf1_chr2:91017268-91017338_14562	Mouse 3' UTR GCLiPP Peak	No	chr2:91017268-91017338	Celf1	24	728	0.289512	215.271	AGGGAAGCCCTAGGGTCCCTCTTCCCCTCCCCTCCCCTCGGCTCAGCCAGCTCACACCCGTGCTTCTTCC	0.671429	0.328571	0.175451	0.89131	0.715859	-14	0.555455
main_Slc38a1_chr15:96575009-96575079_9516	Mouse 3' UTR GCLiPP Peak	No	chr15:96575009-96575079	Slc38a1	39	1868	0.561426	1071.17	TCAGGAATCTCACGAGAGTCACGCAGAGATGTCCCTTACCACACTGAAGTCCCCGCAGACAGGGTTAGGC	0.557143	0.442857	-0.0578028	0.415775	0.473577	-11.8	0.488313
main_Creld2_chr15:88826568-88826638_9425	Mouse 3' UTR GCLiPP Peak	No	chr15:88826568-88826638	Creld2	16	749	1.68159	1286.44	AGCTGATGCTCACTTGGCCCTTTCAAAAGCTGCATTTCTTGGTGGTTCTTACACAGATTTGTATATTTTG	0.4	0.6	0.311268	0.882056	0.570789	-11.8	0.447266
main_Npm1_chr11:33152671-33152741_3573	Mouse 3' UTR GCLiPP Peak	No	chr11:33152671-33152741	Npm1	30	2028	2.21336	4584.67	TAATGCAAAGTGAGAACTTTCCCTACTGTGTTTGATAAATGTTGTCCAGGTTCACTTGCCAAGAATGTGT	0.385714	0.614286	1.84315	1.85113	0.00797183	-7.6	0.355038
main_Sept11_chr5:93171342-93171412_19421	Mouse 3' UTR GCLiPP Peak	No	chr5:93171342-93171412	2019-09-11	36	1105	0.426669	481.55	AGCTTCGCATAAGGCCTGGCAAGCCAAGGACGCCCCCCCGCATTCACCTGCTTTGGCAGTAGTAGCGTAC	0.6	0.4	2.30355	2.30355	0	-12.7	0.56811
main_Zfp207_chr11:80395626-80395696_4635	Mouse 3' UTR GCLiPP Peak	No	chr11:80395626-80395696	Zfp207	13	463	2.81721	1332.26	GTCATTAAGGCTTCATTGTGACTTTTAACAAACATAATCTTCCCACATACCAGGAACTATTGGACATTTA	0.342857	0.657143	2.41021	2.41021	0	-6.2	0.473338
main_Nup155_chr15:8158029-8158099_8457	Mouse 3' UTR GCLiPP Peak	No	chr15:8158029-8158099	Nup155	5	143	3.01286	440.052	GACACAGCAGTCTATGAACAGCTGGAATAAGACTGTGTATGATTATGACACACAAAGATTTTGAATTTCA	0.357143	0.642857	0.131944	0.62	0.488056	-8.4	0.532799
main_Idh3b_chr2:130279338-130279408_15006	Mouse 3' UTR GCLiPP Peak	No	chr2:130279338-130279408	Idh3b	13	476	1.62887	791.921	CACATGTCATGACTTCACTGAAGCTGTCATTACTGCCCTGTCATAAATCCTATACATGCCCATGAAAAAA	0.4	0.6	1.04273	1.32228	0.279549	-5.4	0.467
main_Szrd1_chr4:141115638-141115708_18538	Mouse 3' UTR GCLiPP Peak	No	chr4:141115638-141115708	Szrd1	58	2527	0.753994	1946.08	CCATGGGTCGCACTGCTGTGGCAGACGGCTGGACTTGAGCAGAGGGAATAACCTGACTTACTTGCACTGT	0.557143	0.442857	1.97508	2.01244	0.0373521	-15.4	0.500584
main_Anapc11_chr11:120605651-120605721_5888	Mouse 3' UTR GCLiPP Peak	No	chr11:120605651-120605721	Anapc11	64	2960	1.2628	3817.82	TAAGTAAAACTCATTACAGTTCCGAGCCGTGCTGGAGGCCTCTGCTTGCCTGGTTTCTTGACATACTGAT	0.471429	0.528571	0.342563	0.774366	0.431803	-11.9	0.534502
main_Hras_chr7:141191326-141191396_23728	Mouse 3' UTR GCLiPP Peak	No	chr7:141191326-141191396	Hras	76	2529	0.54254	1401.42	CGATGAGAGTGGTCCTGGCTGCATGAGCTGCAAATGTGTGCTGTCCTGACACCAGGTGAGGCAGGGACCA	0.585714	0.414286	0.789352	1.35958	0.570225	-21.6	0.507189
main_Klf16_chr10:80568737-80568807_2412	Mouse 3' UTR GCLiPP Peak	No	chr10:80568737-80568807	Klf16	21	534	0.732316	399.418	AAGAAAGCAGCAAGGGGACTGAGAATGGACTTGGGTCACCTGGGGGGCCTGGGAGGTGGCCTCAGGTTCT	0.6	0.4	-0.0213521	0.374225	0.395577	-24.4	0.602395
main_Zmat2_chr18:36798283-36798353_12193	Mouse 3' UTR GCLiPP Peak	No	chr18:36798283-36798353	Zmat2	76	2023	2.40293	4965.06	ACTGCTTTCCCCATATCCCCCTGCATCTTTCCCTCTTCATCTATCAAACCTGTTGTCTGAACATCCTCCC	0.485714	0.514286	0.875394	1.10923	0.233831	-2.1	0.561892
main_Med21_chr6:146650456-146650526_22097	Mouse 3' UTR GCLiPP Peak	No	chr6:146650456-146650526	Med21	6	150	4.50308	689.905	AAAACTCTGAAATTGCCACTGACTCATCTTCAAACATCATTATGCCATTTTTTATCTGACTAGAATTTTC	0.314286	0.685714	0.535479	0.777958	0.242479	-0.7	0.433528
main_Zpr1_chr9:46281534-46281604_25728	Mouse 3' UTR GCLiPP Peak	No	chr9:46281534-46281604	Zpr1	19	761	0.636223	494.518	GAAGGATGTCGGAGGGGCCGAGCAGGCACAGGTGAAGACGCCACATTAAAGTGATGGCCTTTAAACGACA	0.542857	0.457143	0.395493	0.621099	0.225606	-21	0.65846
main_Aars_chr8:111055383-111055453_24907	Mouse 3' UTR GCLiPP Peak	No	chr8:111055383-111055453	Aars	25	1295	0.743171	982.984	TTGCCCCCCTCCATTACTGCTCTGAGCCCATTCATGTCAGCACCATCTGTCTAAAATCACTACCCAGGAA	0.5	0.5	0.250521	0.690211	0.43969	-2.6	0.431264
main_Sdf2l1_chr16:17130291-17130361_10028	Mouse 3' UTR GCLiPP Peak	No	chr16:17130291-17130361	Sdf2l1	14	582	1.16204	690.769	TGAAGGTGCCAGCCATATCTGTCCAAGTTACCATCTCACCTGTCTCAAGCACCTGCTGAAATTTTTTTTT	0.428571	0.571429	0.111549	0.705493	0.593944	-7.7	0.511861
main_Atf6_chr1:170709625-170709695_1414	Mouse 3' UTR GCLiPP Peak	No	chr1:170709625-170709695	Atf6	80	2597	0.753879	1999.69	GGCAGTGCAGCCCTGTGGGCAGTGTCGCCTGGTGTTGGTTCTGCTGTGTCATCTTTAGTGCTTTTCTCAA	0.542857	0.457143	-0.0341268	0.629169	0.663296	-17.5	0.599437
main_Socs2_chr10:95411719-95411789_2750	Mouse 3' UTR GCLiPP Peak	No	chr10:95411719-95411789	Socs2	12	583	1.5085	898.259	AATGCAGACAGAGACATTTTACCCCTTGATGTAGCTGTGAGTCCCAACCTAGTGCCATTGTTTTTATTTT	0.4	0.6	0.453859	0.736592	0.282732	-9.9	0.566853
main_Sept2_chr1:93508009-93508079_704	Mouse 3' UTR GCLiPP Peak	No	chr1:93508009-93508079	2019-09-02	2	67	1.90766	130.546	TGTAAGGAAAACTCTGATATTTTATTCCTCCTGAACCACTAATGTTAGAATTTATTTCTAAGAATCAGTC	0.3	0.7	0.351085	0.661958	0.310873	-6.9	0.471466
main_2810403A07Rik_chr3:88712736-88712806_16288	Mouse 3' UTR GCLiPP Peak	No	chr3:88712736-88712806	2810403A07Rik	8	253	2.62966	679.53	ATTTTTGCACATTTTTGAATACTTTGCGGGCTGGCTTTGTACAAACTTATTCTCTGGTTTCTTGTATGTT	0.342857	0.657143	1.86318	1.88042	0.0172394	-5.3	0.48021
main_Shmt2_chr10:127517307-127517377_3019	Mouse 3' UTR GCLiPP Peak	No	chr10:127517307-127517377	Shmt2	19	647	1.02175	675.207	GGGAAGAGGGGGTGGGTAAGCGCCCTCCTTCCTGTTTTTATCTAATAAAATGCTAACCTGCCCAGGGTTC	0.514286	0.485714	0.703	0.865028	0.162028	-25.1	0.603635
main_Ecd_chr14:20320266-20320336_7685	Mouse 3' UTR GCLiPP Peak	No	chr14:20320266-20320336	Ecd	3	168	1.37547	236.02	TATGTTCCTCCTCTGGTCAGAATTCTAAGTTGGCAAAAATCCCATTTCATTCACTTTTTAATGAAATAGA	0.328571	0.671429	0.310099	0.675141	0.365042	-6.2	0.535151
cd8_Dhcr24_chr4:106587341-106587411_8535	Mouse 3' UTR GCLiPP Peak	No	chr4:106587341-106587411	Dhcr24	106	3189	0.496612	1617.56	AAAGTCCTCTCTGCCATCTTCGGACCATCCTGGCCCTACTTCTGTGTGCTCGAGCTGCCCCAGCCATCAC	0.585714	0.414286	0.230521	0.891169	0.660648	-9.1	0.516895
main_Matr3_chr18:35590661-35590731_12104	Mouse 3' UTR GCLiPP Peak	No	chr18:35590661-35590731	Matr3	6	200	3.31383	676.936	TTGACTGTTGTAAGCTATGGAAAACAACTTGCACCACTAAGAGAAAGATAACATAGAACCATTCAGAAAA	0.342857	0.657143	1.06087	1.24315	0.182282	-6.2	0.33438
main_Dek_chr13:47085841-47085911_7141	Mouse 3' UTR GCLiPP Peak	No	chr13:47085841-47085911	Dek	14	651	2.53413	1684.99	TTTTCAGTTTAAATCTTGCATGGCAGTAATCGTTCCTTGCTTTTTATAGTTGTACATTTTGGGTTTCTTT	0.314286	0.685714	1.6638	1.67842	0.0146197	-3.7	0.486889
main_Vat1_chr11:101459788-101459858_5315	Mouse 3' UTR GCLiPP Peak	No	chr11:101459788-101459858	Vat1	94	3910	0.806611	3221.28	TGTGCCAAGGTTAGCCAATCCCTCCCTGCCCTATCCTGTGTGCTTCCACCTCAGCCTCATCCTCCCTCCT	0.585714	0.414286	0.618549	0.930296	0.311746	-6.7	0.600111
main_Mcmbp_chr7:128697740-128697810_23630	Mouse 3' UTR GCLiPP Peak	No	chr7:128697740-128697810	Mcmbp	10	397	2.50522	1015.84	ACACGAGCATCTTTTAATGGAATAAATGCAGCTTTGTGAAGACCACCACATTGTCCTTAACTTTTCTCAT	0.371429	0.628571	0.266479	0.742225	0.475746	-7	0.478808
main_Tbl1xr1_chr3:22211068-22211138_15925	Mouse 3' UTR GCLiPP Peak	No	chr3:22211068-22211138	Tbl1xr1	2	84	1.27974	109.797	ATTATGGAGGGAATTGGAATAATAGGAAACTACATGACTTCCGTCATGTCACTCTCTAAGACACATCAGC	0.4	0.6	1.32441	1.38514	0.0607324	-13.2	0.59065
main_Slc7a1_chr5:148330988-148331058_20518	Mouse 3' UTR GCLiPP Peak	No	chr5:148330988-148331058	Slc7a1	36	1960	1.20877	2419.85	AGTCTGGTGGAAACAGGCTGAGTAGGTAGACTGATGGCCCTGTCTTTCCTCTGCTTTGGAAGATTCTTGA	0.485714	0.514286	0.0450563	0.563789	0.518732	-14.9	0.620569
main_Mis12_chr11:71027247-71027317_4341	Mouse 3' UTR GCLiPP Peak	No	chr11:71027247-71027317	Mis12	52	2949	0.820611	2471.73	CAGGTCCTTCTGCTCTGGCATGATCTCACCCTGTAACACCTGAGACAGCAGGAAGGCATGTAACTTTGGA	0.514286	0.485714	-0.187592	0.509366	0.696958	-13.5	0.57093
main_2310036O22Rik_chr8:85030184-85030254_24558	Mouse 3' UTR GCLiPP Peak	No	chr8:85030184-85030254	2310036O22Rik	82	4869	1.05123	5227.89	TTTCTTCCCATCACCTTGCTCTCTCTGGCTCTGTCTCTTCTTGCTGTCTCTCTCCTTTTAGCAGTCACTT	0.471429	0.528571	0.512225	0.821718	0.309493	-5.1	0.50174
main_Tmem184b_chr15:79361961-79362031_9081	Mouse 3' UTR GCLiPP Peak	No	chr15:79361961-79362031	Tmem184b	9	325	0.450568	149.566	CAGCCAGAAGCCCACACTGCCCTCTCACTTGGGTCCAGTTCTTGATAGTTGGGGGCAGAGCCCCCACACT	0.6	0.4	0.371113	0.685479	0.314366	-21.3	0.666607
main_Pim3_chr15:88865072-88865142_9430	Mouse 3' UTR GCLiPP Peak	No	chr15:88865072-88865142	Pim3	59	1880	0.45744	878.375	CATGGAGCGCCCTGTGGTGCCCACCTCCAACCCTCCAGTCTCCTGGTGTTCATCTGGGCATGTCTGCACA	0.614286	0.385714	0.153239	0.986451	0.833211	-18.3	0.472047
main_Pin1_chr9:20663583-20663653_25307	Mouse 3' UTR GCLiPP Peak	No	chr9:20663583-20663653	Pin1	12	380	0.474454	184.147	CTCTGTTCAGTTGCAAAAAGCAGACGCTCCATACCTGGCGGTGCAGCAACTCAGCCTCAGGGTGCAGTGC	0.571429	0.428571	0.0522817	0.657662	0.60538	-18.4	0.486276
main_Zfp36l1_chr12:80108446-80108516_6306	Mouse 3' UTR GCLiPP Peak	No	chr12:80108446-80108516	Zfp36l1	1	13	1.82311	24.2072	TTTCAGAAATTGGAGAGCAAAAATGTTGCTTATCACTGCACATCAATATAAAAAAGCTTATTTAACTTAT	0.271429	0.728571	2.39448	2.39448	0	-6.7	0.534521
main_Pkig_chr2:163725793-163725863_15493	Mouse 3' UTR GCLiPP Peak	No	chr2:163725793-163725863	Pkig	65	2315	0.444977	1052.15	GCCACCTGGACAGGGACTGTCCTGTCACCACTCACCCTCCAGCCAGCCTGTCTGTCAGGAAGATCTTCCT	0.6	0.4	0.205408	0.587296	0.381887	-15.3	0.605174
main_Zfp706_chr15:37000754-37000824_8615	Mouse 3' UTR GCLiPP Peak	No	chr15:37000754-37000824	Zfp706	32	1573	1.72625	2773.45	GCTACAGAAACACTCGTTTTTACGCTGTTCCCTTTGGGCTTCATGCAAAGACAACTCTGTGTAAATGTAC	0.428571	0.571429	2.52714	2.52714	0	-11.1	0.468291
main_Hnrnph1_chr11:50386108-50386178_3736	Mouse 3' UTR GCLiPP Peak	No	chr11:50386108-50386178	Hnrnph1	5	199	2.77327	563.681	TTTTCTCTAGTTACTGTAGGATGTACGTAAGCAGTAAGTGTATTTAGGTTAAAGCAGTTGAATTATGTTA	0.314286	0.685714	1.83441	1.85911	0.0247042	-8	0.369207
main_Swi5_chr2:32279028-32279098_14119	Mouse 3' UTR GCLiPP Peak	No	chr2:32279028-32279098	Swi5	2	26	2.344	62.247	ATCCAGATTTTGATCTAAACCTGAATGACTGAGCAGCTTCTTGGAGATTTTCATCTACAGCCCACAGGGA	0.428571	0.571429	0.585239	0.821324	0.236085	-8.6	0.459005
main_Cbx7_chr15:79917371-79917441_9179	Mouse 3' UTR GCLiPP Peak	No	chr15:79917371-79917441	Cbx7	80	3005	0.821937	2522.73	CCAGTGGTATGTGGGCAGTCAGGGAGGGAGTGTCCCACCACTTTCTCAGGGCAGTCCTTGTCTTCTTTGT	0.557143	0.442857	0.582352	0.887873	0.305521	-21	0.572555
main_Pla2g12a_chr3:129895709-129895779_16895	Mouse 3' UTR GCLiPP Peak	No	chr3:129895709-129895779	Pla2g12a	84	3493	2.17754	7768.77	GAGGTTGTGGTTACTCCCTCATCCCCGTTTTCCATCTTCTATCCTGGAGTAGTGTTAAAAGTCTGACATT	0.442857	0.557143	-0.0548451	0.58462	0.639465	-11.8	0.622932
main_Ywhag_chr5:135910953-135911023_20210	Mouse 3' UTR GCLiPP Peak	No	chr5:135910953-135911023	Ywhag	8	210	0.141074	30.259	ACGACGACGGCGGTGAAGGCAACAACTAAGGCCCCAGGTGGACTGGCAGCGCCCGCTGATGCTACTACTG	0.628571	0.371429	2.01225	2.18566	0.173408	-17.3	0.600419
main_Lsm12_chr11:102163872-102163942_5336	Mouse 3' UTR GCLiPP Peak	No	chr11:102163872-102163942	Lsm12	1	33	1.10294	37.1753	AAAAAAACCTAGACTTGAACAAACACCCAACAAAAAAAGAGCAAGAGAATAATTTAAAAGTTGAATCATT	0.271429	0.728571	1.63332	1.63332	0	-0.6	0.575634
main_Hnrnpk_chr13:58391790-58391860_7355	Mouse 3' UTR GCLiPP Peak	No	chr13:58391790-58391860	Hnrnpk	35	1595	2.37429	3867.96	TCAGCAGCTCCTCTGTTGGATATAAGTGCACCTCTTGGACATAGACAAAATACATTGGCAAACTCAGTTT	0.414286	0.585714	1.10518	1.21817	0.112986	-7.9	0.453522
main_Ciapin1_chr8:94823037-94823107_24663	Mouse 3' UTR GCLiPP Peak	No	chr8:94823037-94823107	Ciapin1	60	2172	0.374898	831.689	AGGATGCCTAGGAGGGACCTCAAGCCCACACACCTCCTCCTCCAGCAACTCCTGTCCTCAGCTCCTCCCA	0.614286	0.385714	0.182958	1.18163	0.998676	-14.5	0.400753
main_H3f3b_chr11:116023168-116023238_5644	Mouse 3' UTR GCLiPP Peak	No	chr11:116023168-116023238	H3f3b	98	5687	0.757736	4401.38	GTGATGTGAGCACTGTGGCTCAGGAGTGACAAGTTGCTAATACGCAGAAGGGATGGGTGATACTTCTTGC	0.5	0.5	1.75538	1.80901	0.0536338	-16.4	0.438646
main_Samd4b_chr7:28400634-28400704_22534	Mouse 3' UTR GCLiPP Peak	No	chr7:28400634-28400704	Samd4b	45	2185	0.73565	1641.77	GAACCAGGGAATGGGGGGTGTTGGGTTTTTGTTTTCTTGCCTACCCTCTCTGTCAAACTTTCCCACCCCC	0.528571	0.471429	0.621366	0.870465	0.249099	-16.8	0.632362
main_Gna13_chr11:109399585-109399655_5509	Mouse 3' UTR GCLiPP Peak	No	chr11:109399585-109399655	Gna13	27	1075	2.23382	2452.71	TGGCCAAGTTATGCGGTTATATCCTGAGACTCAAGCTATTTGGAAAACCCTCAAATTGGCGCTTTCATTA	0.414286	0.585714	0.89738	0.992113	0.0947324	-12.6	0.562069
main_Vdac1_chr11:52388588-52388658_3810	Mouse 3' UTR GCLiPP Peak	No	chr11:52388588-52388658	Vdac1	23	1447	2.18016	3222.15	TACCTTTTAATGTTGTATGTTGGGGATGCGAGAGTTGATAAATACCACGTTAGACCTCCAGGCTAAGGAT	0.414286	0.585714	1.42872	1.43393	0.00521127	-10.2	0.469573
main_Snx3_chr10:42534922-42534992_1899	Mouse 3' UTR GCLiPP Peak	No	chr10:42534922-42534992	Snx3	61	2973	0.861248	2615.24	CATTCGTTTGCTTTAGTGAAACTCCCTCGCTCCAGCCTCTCTAAGTAGCTCTTCCCGCTGTGTCCGTGTG	0.528571	0.471429	1.07241	1.14156	0.0691549	-8.7	0.414978
main_Suds3_chr5:117092711-117092781_19735	Mouse 3' UTR GCLiPP Peak	No	chr5:117092711-117092781	Suds3	16	560	0.131501	75.2152	ATGGCCGCCACCTCCATCTCTGTGCCGCTCTCTCCTGCCTCGGCCTCTTCCAGAACTCAGTCACCAGAGA	0.614286	0.385714	0.318056	0.726901	0.408845	-9.5	0.483783
main_Purb_chr11:6470365-6470435_3374	Mouse 3' UTR GCLiPP Peak	No	chr11:6470365-6470435	Purb	7	281	2.64476	759.068	TGTCAAGTGACTTTGCATTGTATATTTCCATTTTAACCCTGACATAGTTCTCAAAGATAAAGCACTTTTT	0.314286	0.685714	1.88354	1.93294	0.0494085	-6.6	0.613421
rapidmain_Polr3h_chr15:81916553-81916623_9290	Mouse 3' UTR GCLiPP Peak	Yes	chr15:81916553-81916623	Polr3h	22	925	0.708267	669.156	ACGAGCAACTAGCCCTGGAGCTCACAGTGACTGCCCAGCCTGAAGACCCTGTCCAGACTTGGGAAAGTAG	0.571429	0.428571	-0.0268592	0.987141	1.014	-15.9	0.565514
main_Coa5_chr1:37418797-37418867_161	Mouse 3' UTR GCLiPP Peak	No	chr1:37418797-37418867	Coa5	41	2372	1.33889	3243.76	ATTGCTGACAGCCATTCTGCTTGTGATAAAGAGGCATCTATTGGGATCTTGGTTGCATTTCTCTAGTGTC	0.428571	0.571429	0.393845	0.630915	0.23707	-11.1	0.519003
main_Tardbp_chr4:148617456-148617526_18618	Mouse 3' UTR GCLiPP Peak	No	chr4:148617456-148617526	Tardbp	34	1735	1.42603	2527.06	GAGTCGTATCAACGCTATGAACGCAAGGCTGTGATATGGAACCAGAAGGCTGTTTGAACTTTTGAAACCT	0.442857	0.557143	2.36701	2.37558	0.00856338	-15.3	0.415985
main_Nudcd2_chr11:40739341-40739411_3600	Mouse 3' UTR GCLiPP Peak	No	chr11:40739341-40739411	Nudcd2	9	315	0.927057	298.267	TTAAAGATTGCCAAGTGTATTTCAATATGGTTGTAAAGATCACATTCAGATATGGTTTGCACAGGAGGCA	0.357143	0.642857	0.909577	0.988225	0.0786479	-12.6	0.360174
main_Ece1_chr4:137963193-137963263_18372	Mouse 3' UTR GCLiPP Peak	No	chr4:137963193-137963263	Ece1	33	1509	0.440891	679.53	GCAGTGGGACATGGCCCCCTGCCCACATCCAATGCCAGATACACCACAATACCACTGTGTCAAATGCTTT	0.528571	0.471429	0.894	1.13961	0.245606	-14.8	0.720841
main_Psme3_chr11:101321885-101321955_5287	Mouse 3' UTR GCLiPP Peak	No	chr11:101321885-101321955	Psme3	44	1417	0.864961	1251.86	GCCAGGGGACTTTGTGAGTCTGGCTCAAGACCGACATTGCCTTGGTTTGTTACATGACTATCGTGATGGG	0.514286	0.485714	2.1807	2.1807	0	-21.4	0.459439
main_Poldip3_chr15:83127634-83127704_9367	Mouse 3' UTR GCLiPP Peak	No	chr15:83127634-83127704	Poldip3	73	2534	1.85489	4800.8	GTGCGTTCCATTTCTGTAGTATGTTTCCTCTTTCCTCCATTCATCATCAAGGTAGGCTGTGTTTGTCGGT	0.442857	0.557143	0.396225	0.869944	0.473718	-3.4	0.488828
main_Dctn4_chr18:60557192-60557262_12349	Mouse 3' UTR GCLiPP Peak	No	chr18:60557192-60557262	Dctn4	52	1845	0.959761	1808.62	CATGTAACTCTTGCTGGCCTGGAACTCAGCCTGCTAGGATTAAAGATACTTGCCACCATGCCCATGCCCT	0.514286	0.485714	-0.0380141	0.483225	0.521239	-9.6	0.604664
main_Srxn1_chr2:152109792-152109862_15151	Mouse 3' UTR GCLiPP Peak	No	chr2:152109792-152109862	Srxn1	43	1590	0.927894	1506.9	GTTTCAGGACCCTGTTCTTTGCTTATTTGCACATGGTCACCTTGGTCTGAGCTAGCCACCATTGTCACCC	0.5	0.5	0.0779718	0.541465	0.463493	-11.3	0.468799
main_Pold4_chr19:4233524-4233594_12642	Mouse 3' UTR GCLiPP Peak	No	chr19:4233524-4233594	Pold4	13	612	0.861657	538.61	GCAGATAACCTAAAGGGCCCACCTTGGGCATCTAGCTGAGGGCACAGATGAGTGAGTTATTGGATCAAGG	0.514286	0.485714	0.348183	0.741958	0.393775	-13.2	0.62885
main_Eif5a_chr11:69917057-69917127_4273	Mouse 3' UTR GCLiPP Peak	No	chr11:69917057-69917127	Eif5a	113	5575	0.771592	4393.6	TGCCTCTTCTCTCGCAGCCCTGATGGGGGAAAGGGAGTTGGGTACTGCTTGTGGTTTAGGTTCCCCTCTC	0.571429	0.428571	1.14977	1.30515	0.15538	-20	0.562137
main_Wsb1_chr11:79239795-79239865_4590	Mouse 3' UTR GCLiPP Peak	No	chr11:79239795-79239865	Wsb1	8	213	2.45588	534.287	AATGGAATTGGTCAGGATAGATGGTGTGAAACTGATAAGAGGTTTTGGATGTGAAAAAGAGTTTCCAAAA	0.357143	0.642857	0.221423	0.882549	0.661127	-8.6	0.447354
main_Zcchc10_chr11:53332867-53332937_3827	Mouse 3' UTR GCLiPP Peak	No	chr11:53332867-53332937	Zcchc10	38	1774	1.3336	2416.39	GAGGAGACTGGCCTTGATTTCAGAGAGATCTTCTAATGTTGGGACTAAAGATATGTGCCACCATGCTCAG	0.457143	0.542857	-0.0649014	0.494141	0.559042	-13.2	0.439186
main_Myl12b_chr17:70974025-70974095_11716	Mouse 3' UTR GCLiPP Peak	No	chr17:70974025-70974095	Myl12b	16	591	1.84184	1111.8	TTGTAAATTGTACTGAAAACGAGATGCAAATAAAAAATGAACCACTGTGAAAGCCCAGGACAATATATCC	0.342857	0.657143	1.30241	1.33354	0.0311268	-6	0.383677
main_Rcl1_chr19:29143521-29143591_13174	Mouse 3' UTR GCLiPP Peak	No	chr19:29143521-29143591	Rcl1	22	595	0.423933	257.634	ACCTGGAGGAGGGGCCCTCCGTGAGTGGCCACGCTGCTAGACAGTATCCCAGCAGCTCTTCTTCATCTTT	0.585714	0.414286	-0.19238	0.601282	0.793662	-26.9	0.474712
main_Nfyb_chr10:82750357-82750427_2642	Mouse 3' UTR GCLiPP Peak	No	chr10:82750357-82750427	Nfyb	18	816	0.32364	269.737	TCAGTTTTCATGATCGGAAGGACGGACGGAACCGGGCTTGTGTGGAGAGAGTCTGATGGAGTCTGAAGCA	0.528571	0.471429	0.532296	1.09877	0.566479	-16.2	0.394219
main_Cdc42se1_chr3:95234253-95234323_16502	Mouse 3' UTR GCLiPP Peak	No	chr3:95234253-95234323	Cdc42se1	19	1165	0.919826	1094.51	TGCAGTCTTGGAGTTCCCATTCTGTGATTCTGTGTCCAGCCCAAAAGAAATGCCACCACCAGATCCCTTC	0.5	0.5	0.591338	0.887592	0.296254	-8.5	0.467248
main_Mcmbp_chr7:128698285-128698355_23634	Mouse 3' UTR GCLiPP Peak	No	chr7:128698285-128698355	Mcmbp	8	235	1.5344	368.295	TATCCAAAAACACAGTGACTTTTCCTGAAATCAAGTCTGGTGACACCTAAAGTTTATATGATTCTCTGTA	0.342857	0.657143	1.15049	1.20534	0.0548451	-5.8	0.434083
main_Irf2bp2_chr8:126590677-126590747_25206	Mouse 3' UTR GCLiPP Peak	No	chr8:126590677-126590747	Irf2bp2	1	51	0.232357	12.1036	AGCACTTGGCAAACAAATGCTTCTAGCTGTATTTGTATGCACTTATTTTAAAAAAGAAAAAAAGCCAAAT	0.3	0.7	2.14893	2.14893	0	-12.3	0.451426
main_Wnk1_chr6:119925168-119925238_21630	Mouse 3' UTR GCLiPP Peak	No	chr6:119925168-119925238	Wnk1	26	1365	1.32826	1851.85	GTTCTGTTTCAGAAAGAATGAGGAGGGTTGTGAGCTGTGTGTGAAAGATAAGGACTGAAGATGTGGGGAC	0.457143	0.542857	0.500282	0.695099	0.194817	-5.8	0.471211
main_Caprin1_chr2:103765905-103765975_14725	Mouse 3' UTR GCLiPP Peak	No	chr2:103765905-103765975	Caprin1	39	1655	1.64532	2781.23	TTTGTCATTCCTCACCATAATTGCATTGTCATCACTAATCCTTGGATCTTGCTGTATTGTTACTCAAATT	0.342857	0.657143	1.5433	1.5942	0.0509014	-3.6	0.489114
main_Myadm_chr7:3297992-3298062_22109	Mouse 3' UTR GCLiPP Peak	No	chr7:3297992-3298062	Myadm	76	2918	0.727222	2167.41	GCTTTCTTTCCCTCACCCCTCAAAGGTGCTGGCCCCACACATCCCACACTCCTTTACAGTTACCCACACT	0.542857	0.457143	0.304662	0.849845	0.545183	-5.4	0.479967
main_Acp1_chr12:30895302-30895372_6059	Mouse 3' UTR GCLiPP Peak	No	chr12:30895302-30895372	Acp1	50	1761	0.321562	578.379	GGTGTTGAGGGATTTGAGAGAGGAGACGCTGGATGTGCTGATGGGCCTGGGACTCCAGCAGGCCGTCCTG	0.614286	0.385714	-0.0976479	0.593423	0.69107	-18.2	0.472924
main_Golph3_chr15:12350153-12350223_8498	Mouse 3' UTR GCLiPP Peak	No	chr15:12350153-12350223	Golph3	23	714	0.815621	594.805	TGCCTGCAGTTCAGACAAGTCACAGCCAGGCCTTCAACTCACCAAAGGCAAACATCTGTATCTATTAGGA	0.471429	0.528571	1.72356	1.75224	0.0286761	-9.3	0.587871
rapidmain_Myeov2_chr1:92637261-92637331_687	Mouse 3' UTR GCLiPP Peak	Yes	chr1:92637261-92637331	Myeov2	40	2203	1.26256	2840.89	GTGTCTGGAGTCTCTCGGGACACGACCAGCTGATTGTAGACACCGTGTTGATATCACTAGAAATGAAGAC	0.485714	0.514286	-0.369817	0.819056	1.18887	-18.9	0.660158
main_Stk4_chr2:164155061-164155131_15525	Mouse 3' UTR GCLiPP Peak	No	chr2:164155061-164155131	Stk4	12	382	2.31775	904.311	GGGGGAAGTTTTTCCAGCTCAAACTACACCCTCACCCTCACCACCCTTTTTAAAGCACTGTTTTTGTATT	0.442857	0.557143	0.246268	0.570239	0.323972	-8.7	0.525684
main_Myl12b_chr17:70974179-70974249_11719	Mouse 3' UTR GCLiPP Peak	No	chr17:70974179-70974249	Myl12b	5	337	0.700765	241.207	CCTACTGCGTGCCACTTAGTTTCTCAGTCACTTCCCCTCCCCCATAGGGCCTACTGTGTGCCACTTAGTT	0.542857	0.457143	0.27438	0.730465	0.456085	-13.1	0.471351
main_Set_chr2:30071225-30071295_13959	Mouse 3' UTR GCLiPP Peak	No	chr2:30071225-30071295	Set	15	286	0.399545	116.713	AAGCCCTCCAGTTCCCTTGGCTCTGCTGGAGGGCGCTAGGCCCCTGTGTAGTAGTTTATAGAATTTTAGC	0.528571	0.471429	1.66055	1.71114	0.0505915	-26.6	0.546171
main_Paip2b_chr6:83806107-83806177_21225	Mouse 3' UTR GCLiPP Peak	No	chr6:83806107-83806177	Paip2b	18	717	1.44143	1055.61	CCCGTGAAAGGTTGAGACTGGGTTAGCACTATTTCCAAAGTCACAAGACCTATGATTGCTTCATTAAGAT	0.414286	0.585714	0.205718	0.664338	0.45862	-11.2	0.383764
main_Nufip2_chr11:77711393-77711463_4522	Mouse 3' UTR GCLiPP Peak	No	chr11:77711393-77711463	Nufip2	23	1179	1.76971	2131.1	TTCTAAGAAATGTCCAGTTTTGAGCGATTGTAGTGTGGATGGATTTTCTGGTTTTGTTAACTATTTCAGG	0.357143	0.642857	1.38676	1.4389	0.0521408	-9.1	0.420669
main_Ptma_chr1:86530517-86530587_595	Mouse 3' UTR GCLiPP Peak	No	chr1:86530517-86530587	Ptma	1	14	0.423222	6.05179	GCTGTACTATAAGTAGTTGGTTTGTATGAGATGGTTAAAAAGGCCAAAGATAAAAAGATTTTTTTTTTCC	0.3	0.7	1.54055	1.56469	0.0241408	-6.7	0.396552
main_Eif3j2_chr2:122052815-122052885_14912	Mouse 3' UTR GCLiPP Peak	No	chr2:122052815-122052885	Eif3j2	21	777	1.19177	945.809	GCCTGATTCAAGTGTCTGAGAAACAAATGTTCTAGGCTGCAGTGGGAAAACTTTGAACAGGGTTTTGGCG	0.457143	0.542857	1.26083	1.32999	0.0691549	-12.9	0.44453
main_Tgoln1_chr6:72611072-72611142_21110	Mouse 3' UTR GCLiPP Peak	No	chr6:72611072-72611142	Tgoln1	15	404	1.0832	446.968	AGAGAGAAAAGTCTCAGCTAATCTCAGGGATGCAGAGAGAACGAGAAGAAGAAAAGTATGAGTCCTGTGC	0.442857	0.557143	0.111817	0.540155	0.428338	-9.3	0.700977
main_Scd2_chr19:44305981-44306051_13375	Mouse 3' UTR GCLiPP Peak	No	chr19:44305981-44306051	Scd2	21	751	1.42689	1094.51	GAACTTTTCTTGGGGCTGTTTTGCTCAAGTGCCCGTAGCTGATGGATGGGTGAAGTAATTTTGAACGTAC	0.457143	0.542857	0.792211	0.864718	0.072507	-12.9	0.506275
main_Hmgn1_chr16:96122108-96122178_10588	Mouse 3' UTR GCLiPP Peak	No	chr16:96122108-96122178	Hmgn1	14	452	1.11236	513.538	TTTTGGTACAACCAGAAAATAGCAGGATACTGAATCAGGAGAGGCTGTGACTGTCTCGGGGGTCACCATA	0.471429	0.528571	0.749366	0.828831	0.0794648	-17.1	0.567497
main_Mlec_chr5:115145488-115145558_19670	Mouse 3' UTR GCLiPP Peak	No	chr5:115145488-115145558	Mlec	3	74	2.89392	218.729	ATGTAGGTACTTGAGGTTTGGGTTAAAGGGGCTGGGTGGGGCACGCTTTATTTTTATTTTTGTATTGTGT	0.414286	0.585714	1.26699	1.31454	0.0475493	-11.9	0.646735
main_Rap1b_chr10:117814813-117814883_2910	Mouse 3' UTR GCLiPP Peak	No	chr10:117814813-117814883	Rap1b	44	2204	2.00896	4522.42	AACGTTTCGGTTGAGATGTTAACTGGTGGACGAGTACTGTGGATGTGAATGTGGGATGTCATTTTAATCA	0.414286	0.585714	2.29779	2.29779	0	-13.8	0.449068
main_Mapre1_chr2:153768122-153768192_15282	Mouse 3' UTR GCLiPP Peak	No	chr2:153768122-153768192	Mapre1	30	877	1.63691	1466.26	CTCCCTCAATTGCTTTACCCATAGCCTATTCAATTCCTTTGTTTGGCGAACTCTGCAAAATGTGTTACCC	0.428571	0.571429	1.069	1.15055	0.0815493	-7.1	0.41695
rapidmain_Eefsec_chr6:88257873-88257943_21330	Mouse 3' UTR GCLiPP Peak	Yes	chr6:88257873-88257943	Eefsec	13	447	0.789635	360.514	AAGAGTGTGCAGCCACTCAGCCTTGCCCCAACTAGCTGGCACCCTCCAACGGAAAATAAACATCCCATAT	0.514286	0.485714	-0.204704	0.838676	1.04338	-12.3	0.655384
main_Rras2_chr7:114047553-114047623_23304	Mouse 3' UTR GCLiPP Peak	No	chr7:114047553-114047623	Rras2	22	866	2.25686	1996.23	TGGCCAAAATACCAAAATGCCTGTTGTATTTATGGATTAAAAACTGCTGATTAAGCCTTTGTTATCATGC	0.342857	0.657143	1.17144	1.25366	0.0822254	-7.2	0.483116
main_Strap_chr6:137751264-137751334_22004	Mouse 3' UTR GCLiPP Peak	No	chr6:137751264-137751334	Strap	2	115	0.97893	114.984	TATCTTTTGTTGTGTGTTCATTTATTTCCTTCTGGATGGATACAATTGCTTCTCTTGTCTCTTTAAACAT	0.314286	0.685714	0.0981831	0.722183	0.624	-10.6	0.558722
main_Mark2_chr19:7275828-7275898_12917	Mouse 3' UTR GCLiPP Peak	No	chr19:7275828-7275898	Mark2	55	1943	1.67503	3324.16	CTTGAGAAATTGGGGAAGTCCTACAGAGGCTGCCCCTGCCCTCACCTGAGTTGTACATTTTTTTTGTGAT	0.471429	0.528571	1.30154	1.3323	0.0307606	-15.9	0.603034
main_Rap1b_chr10:117815451-117815521_2917	Mouse 3' UTR GCLiPP Peak	No	chr10:117815451-117815521	Rap1b	4	71	1.88363	136.598	ATGTATGAAAATGGTGTACTGTATACTTTAACACACCCCATACTTTGTATTGGAGAGTACAATAATGTAA	0.314286	0.685714	2.13049	2.13613	0.0056338	-11.5	0.440413
main_Rab11b_chr17:33746777-33746847_11113	Mouse 3' UTR GCLiPP Peak	No	chr17:33746777-33746847	Rab11b	47	2643	0.827548	2233.98	TGCCCATCCCCACTTCTCTGTCTCGTCTCCGTGTCTGGTCAGGAACCTGTCTGCAAGTGAAGCAATATCT	0.528571	0.471429	0.846437	1.30666	0.460225	-7.6	0.418172
main_Lbr_chr1:181816746-181816816_1624	Mouse 3' UTR GCLiPP Peak	No	chr1:181816746-181816816	Lbr	46	1980	1.57789	3191.02	AAGGGAAAGTCCAAATGAACTAATGTGATGCACTGACAGGATCTCTAGGTTTGTTTTTGAGTCAGGACTA	0.4	0.6	0.0315775	0.803493	0.771915	-12.2	0.436741
main_Eaf1_chr14:31506634-31506704_7831	Mouse 3' UTR GCLiPP Peak	No	chr14:31506634-31506704	Eaf1	33	1572	0.880366	1413.53	CTGCTTTCTGGAACTCAAACATGCTACAAGACCCAGCTCCATCTGCCAGGACCACATGTCACAGGAGGAT	0.514286	0.485714	0.239352	0.912282	0.67293	-10.6	0.604165
main_Aebp2_chr6:140650849-140650919_22009	Mouse 3' UTR GCLiPP Peak	No	chr6:140650849-140650919	Aebp2	39	1358	1.96776	2729.36	GGCTTAGGGAAAGTTGCACATTACAGTCAACCCCTTCCTTCCTCCTTTACTTTAAGTCCAGTATTTAGAG	0.428571	0.571429	1.17946	1.37228	0.192817	-13.2	0.579369
main_Brwd1_chr16:96066756-96066826_10580	Mouse 3' UTR GCLiPP Peak	No	chr16:96066756-96066826	Brwd1	48	2137	2.6542	5793.3	GAAAACACTTGGTGGATTGTAAAGTGCTGTGCTGTGTTACTGCTGTATCTGAGATGTTTTAAGTTCCCCT	0.414286	0.585714	1.61237	1.66234	0.0499718	-9.2	0.417953
rapidmain_Pgs1_chr11:118023822-118023892_5769	Mouse 3' UTR GCLiPP Peak	Yes	chr11:118023822-118023892	Pgs1	51	2669	2.30243	6276.58	ATCCCAGCAATGTTCCTTCCTGATCCCTCCTGTGTAATGTCTACTCTCTGTGTACATAGGGAATAAGTTA	0.428571	0.571429	-0.679394	0.910014	1.58941	-10.3	0.519317
main_Hilpda_chr6:29275266-29275336_20632	Mouse 3' UTR GCLiPP Peak	No	chr6:29275266-29275336	Hilpda	4	83	5.72114	485.008	CAGTGTCCAGGTCAAGTTGTACATTTAAGTTCTTTCTCCAGTGTAATGCACATGTGTTTGTATATAATGT	0.357143	0.642857	0.0288169	0.524958	0.496141	-7.1	0.49403
main_Sppl3_chr5:115097451-115097521_19642	Mouse 3' UTR GCLiPP Peak	No	chr5:115097451-115097521	Sppl3	15	562	1.37359	788.462	TTTTATGGATCTGCACCAGACTGTTAACTTGTGGGGAGATGGCGAAGTTGACTTATTTAAAAACTACAAA	0.371429	0.628571	0.906183	1.04238	0.136197	-10.6	0.524918
main_Clptm1_chr7:19633493-19633563_22352	Mouse 3' UTR GCLiPP Peak	No	chr7:19633493-19633563	Clptm1	18	603	0.126335	77.8088	GGGCCCGGTGTGTGAGATGGGGCCGGGCAGGTTGGGGCTGGCTGTGTGTATGTGGAGGCACCGTCCATCG	0.685714	0.314286	0.344479	0.728901	0.384423	-26.2	0.56894
main_Klf13_chr7:63890338-63890408_22869	Mouse 3' UTR GCLiPP Peak	No	chr7:63890338-63890408	Klf13	120	5932	0.810485	4910.6	CACAGTTCCACACTGTTGCATTACCCACTCTTCTGTCCTGCTTCTGCCTGCCCTGCTTGAGAGCACCCAA	0.542857	0.457143	-0.127676	0.415254	0.54293	-10.7	0.585307
main_Zfp740_chr15:102213515-102213585_9755	Mouse 3' UTR GCLiPP Peak	No	chr15:102213515-102213585	Zfp740	69	4055	1.21237	5021.26	AGGCACAGTTGAGCAGGGGGTTGTGGGTATCAGAGTATGCTGTCCTTTTGTGTCCTCTTAGAACAAGGAT	0.485714	0.514286	0.564789	0.682648	0.117859	-14.5	0.531055
main_Stat3_chr11:100889477-100889547_5254	Mouse 3' UTR GCLiPP Peak	No	chr11:100889477-100889547	Stat3	15	602	0.614445	377.805	ACTTTAGATTCATTGATGCAGTTTGGAAATAACGGTGAAGGTGCTGAGCCCTCAGCAGGAGGGCAGTTTG	0.471429	0.528571	2.04182	2.09754	0.0557183	-16.1	0.587985
main_Clns1a_chr7:97718714-97718784_23119	Mouse 3' UTR GCLiPP Peak	No	chr7:97718714-97718784	Clns1a	139	6599	1.62208	10933	TACCATCAGCTCTGTTATGTTCTCCTAGGTTAGGTCCTTGACTGTCCACCCTCTTAACGTTCGCTTTCTG	0.471429	0.528571	0.449761	0.60869	0.15893	-6.9	0.419721
main_Mid1_chrX:169989253-169989323_27348	Mouse 3' UTR GCLiPP Peak	No	chrX:169989253-169989323	Mid1	61	2060	0.499237	1050.42	AGGCCGCTGTTTATGGGGTCGAGAAACTCAGGCTTCCAGAGCGTCGTGACATCTTCCCCAATCTGTCCAG	0.557143	0.442857	0.62362	0.739056	0.115437	-14	0.735027
main_Nxf1_chr19:8765512-8765582_12954	Mouse 3' UTR GCLiPP Peak	No	chr19:8765512-8765582	Nxf1	28	716	0.598185	437.458	ATGATCCACTTAGCCAAGGCTGTGGCCTGGTCCTTTCTGCCCATGCTGATGTTGATGCCTCTTGGAGGCT	0.542857	0.457143	0.304718	0.733648	0.42893	-19.1	0.67679
main_Riok3_chr18:12155443-12155513_11954	Mouse 3' UTR GCLiPP Peak	No	chr18:12155443-12155513	Riok3	8	362	1.15743	427.948	GTGTGCAATTTTTAACTCGGCATTGAAAGAATAAAATGTCACTACCTCTCATCTTACAAAAAGGATAATA	0.314286	0.685714	1.50055	1.58576	0.0852113	-6.2	0.551641
main_Ywhaz_chr15:36772391-36772461_8609	Mouse 3' UTR GCLiPP Peak	No	chr15:36772391-36772461	Ywhaz	20	867	2.37434	2102.57	GTTTGGCATAGTACTTTTGGTACATTGTGGCTTCAGAAGGGCCAGTGTTAAAACTGCTTCCATGTCTAAG	0.428571	0.571429	1.72658	1.74204	0.0154648	-15.8	0.393574
main_Dcp2_chr18:44421266-44421336_12257	Mouse 3' UTR GCLiPP Peak	No	chr18:44421266-44421336	Dcp2	45	1946	1.84556	3668.25	AGGGTTTTGCTGTTTTAAGTGTGTTGTGGGAAAGGATCTTGAAAAGAACAGATAGCAGTTGCTGGGAGGA	0.428571	0.571429	0.302859	0.631563	0.328704	-10.3	0.547156
main_Slc6a6_chr6:91756807-91756877_21416	Mouse 3' UTR GCLiPP Peak	No	chr6:91756807-91756877	Slc6a6	31	920	1.34327	1262.23	TGAAAGACAGGTGAAGTGTAAGGGAGAGGGGGGCTCGTCCAGCTGTGGCAGTGTCTGTGGTCATGCCCGT	0.585714	0.414286	0.119085	0.913141	0.794056	-14.8	0.652423
main_Nsa2_chr13:97131019-97131089_7516	Mouse 3' UTR GCLiPP Peak	No	chr13:97131019-97131089	Nsa2	38	1417	1.04954	1519	TGGGGTCTTTCTGAACCACCGAGCAGCCTTACCTCATGTGCAGTCATCAAGCATTTACTAAGTTGTAAAG	0.457143	0.542857	0.252493	0.671817	0.419324	-11.5	0.431113
main_Caprin1_chr2:103766439-103766509_14730	Mouse 3' UTR GCLiPP Peak	No	chr2:103766439-103766509	Caprin1	7	241	1.22927	302.59	ATGGGGTGATAATATCTCCATAGTTAGTTGAAGTGGCTTGGAAAAAAAATGCAAGATTGAATTTTTGACC	0.342857	0.657143	1.09475	1.30548	0.210732	-10	0.484325
main_Fads1_chr19:10194917-10194987_13046	Mouse 3' UTR GCLiPP Peak	No	chr19:10194917-10194987	Fads1	27	1094	0.68319	763.391	AATAGCAGCAGCAGACCTCCATATGGAGGAGGAAGAGGACACCTGGAGCCAAAGCAGGAGTTGGAGGGAC	0.557143	0.442857	0.30838	0.803028	0.494648	-15.1	0.605825
main_Larp4_chr15:100013610-100013680_9673	Mouse 3' UTR GCLiPP Peak	No	chr15:100013610-100013680	Larp4	7	188	1.80094	345.817	AAATGCATAATTTCTCAGTGAATAAAGTTGTAGCTGTCAGACATTAAATAGGCAAAGTTACATGCTGATA	0.314286	0.685714	0.938014	0.957141	0.0191268	-9.7	0.41166
main_Ppil1_chr17:29250993-29251063_10978	Mouse 3' UTR GCLiPP Peak	No	chr17:29250993-29251063	Ppil1	30	888	0.684399	620.741	GGCCATTTTTCCCCGGGGAGGGATGGGAGTCTAGTGAGCACAAGGCCGTCACAGGCTTCCCACAGGAAGT	0.6	0.4	0.253282	0.664042	0.410761	-22.8	0.495079
main_Chmp1a_chr8:123204337-123204407_25152	Mouse 3' UTR GCLiPP Peak	No	chr8:123204337-123204407	Chmp1a	59	2595	1.14718	3040.59	GGATAACTTGTGAGTTCCCTGGGTCCTGGAGGGTGCAGGGTTTGTGGAACAGTAGTAGGGATGGGGAGCT	0.557143	0.442857	0.00890141	0.569915	0.561014	-17.7	0.539163
main_Gsk3b_chr16:38245080-38245150_10343	Mouse 3' UTR GCLiPP Peak	No	chr16:38245080-38245150	Gsk3b	17	601	1.23516	758.203	TGTTGCGATGGATCACTTCGGCCTGTACACATCCAATTAGCGTGACCACTTCCATCTTAAAAACAAATCT	0.428571	0.571429	2.33797	2.33797	0	-10.2	0.475023
main_Ywhaz_chr15:36772103-36772173_8606	Mouse 3' UTR GCLiPP Peak	No	chr15:36772103-36772173	Ywhaz	42	1758	2.63322	4728.18	TTTACTCTGGTAAGGGCAGAAACGGTTCACATTCCATTATTTGTAAAGTTACCTGCTGTTTGCTTTCATT	0.371429	0.628571	2.0891	2.0891	0	-9.8	0.450926
main_Xbp1_chr11:5525055-5525125_3287	Mouse 3' UTR GCLiPP Peak	No	chr11:5525055-5525125	Xbp1	86	3924	0.584788	2343.77	CATCTCAAACCTGCTTTCATCCAGCCATTGTCTGAGACCACCTTCTTGCCTGCTGGACGCTCACAGTGAC	0.528571	0.471429	1.27199	1.36982	0.097831	-11.3	0.469206
main_Eef1a1_chr9:78478579-78478649_26152	Mouse 3' UTR GCLiPP Peak	No	chr9:78478579-78478649	Eef1a1	3	132	1.76984	238.614	AGTTTAATAGTAAAAGACTGGTTAATGATAACAATGCATCGTAAAACCTTCAGAAGGAAAGAATGTTGTG	0.314286	0.685714	1.83949	1.83949	0	-5.5	0.368775
main_Derl1_chr15:57871204-57871274_8660	Mouse 3' UTR GCLiPP Peak	No	chr15:57871204-57871274	Derl1	19	682	0.1328	92.506	AGAAGATGGAGCAGCTGAGGAAGCTCTTCCTCTGCTGTGGGGCCTGCATCCGCCTGTCCGCAGTGCCGCC	0.642857	0.357143	0.303507	0.831254	0.527746	-27.3	0.678517
main_Rad21_chr15:51962651-51962721_8646	Mouse 3' UTR GCLiPP Peak	No	chr15:51962651-51962721	Rad21	4	83	0.856641	72.6215	TTGTTAAACATTTTGTTAGTCCAGTTTTTGTCGCTTATTGGGTTTAATATTGTTCTTGAAAATAGTCGAT	0.285714	0.714286	2.37779	2.40987	0.0320845	-6.7	0.328072
main_D8Ertd738e_chr8:84246482-84246552_24502	Mouse 3' UTR GCLiPP Peak	No	chr8:84246482-84246552	D8Ertd738e	13	322	0.107777	35.4462	AGGCACTGGGACTTTGCTGGTCACCCCACAGGCTGGCTGGACTTGGAAGAGGGCCCTGCTCCAGTCCTGG	0.642857	0.357143	-0.21069	0.653676	0.864366	-21.8	0.567854
cd8_Leprotl1_chr8:34137531-34137601_11873	Mouse 3' UTR GCLiPP Peak	No	chr8:34137531-34137601	Leprotl1	11	381	1.78842	695.956	TCACTGTTGTTCGCCTCCTGTTTCCATGGGGACTTGCTGAAGATTAAAAGGATTTTCTCATTTGGAAAAG	0.414286	0.585714	1.31928	1.39027	0.0709859	-11.6	0.53562
main_Zmat3_chr3:32340761-32340831_15970	Mouse 3' UTR GCLiPP Peak	No	chr3:32340761-32340831	Zmat3	54	1690	0.536916	926.789	CCTGCTTGGATCAGCTTCTCCACTCGCTCACCCCATCCTCATGGCCTCGCTTGCTGGCAGTTTTGGAGAC	0.585714	0.414286	0.387211	0.705465	0.318254	-12	0.506177
main_Khsrp_chr17:57022471-57022541_11671	Mouse 3' UTR GCLiPP Peak	No	chr17:57022471-57022541	Khsrp	2	77	0.131913	10.3745	GTGGAACTCTGAACTGCTGGGGTGTCCCGGGTGGGGGCAGGATGTGGGGACTGTGCTGGGTGCCACACCG	0.671429	0.328571	0.456944	1.07734	0.620394	-24.2	0.702795
main_H2afj_chr6:136809458-136809528_21987	Mouse 3' UTR GCLiPP Peak	No	chr6:136809458-136809528	H2afj	33	1356	1.40013	1939.17	CTACATTAGACCGTGTCTCAAAATATGTTTCTGTCTCCCCTCGAGTTTTAGCTGCATGGCAGCCTCTTAT	0.442857	0.557143	-0.156183	0.562803	0.718986	-10.2	0.614222
main_Atp5a1_chr18:77782364-77782434_12507	Mouse 3' UTR GCLiPP Peak	No	chr18:77782364-77782434	Atp5a1	18	681	1.31379	913.821	GCTGGGTTTGAACCATAAAGCCCTGTCACTGTCACCAGATACTGCTTTGGTTTTGTCATTTATTCTGGTA	0.428571	0.571429	0.82407	1.1148	0.290732	-15	0.438591
main_Lrpprc_chr17:84705368-84705438_11835	Mouse 3' UTR GCLiPP Peak	No	chr17:84705368-84705438	Lrpprc	100	4048	0.745238	3081.23	AAGCAAGGGAAAGCCCTTCATGAGAGAAGCAGCGCGGCTGTGTGTGTGTCTATGTGTGTGTGTGTCTGTG	0.528571	0.471429	0.163169	0.529704	0.366535	-13.8	0.4644
main_Ccdc71_chr9:108464448-108464518_26428	Mouse 3' UTR GCLiPP Peak	No	chr9:108464448-108464518	Ccdc71	19	697	1.39414	992.494	TTGGGTGGGGTGGTTTGCGGGAGGGGTGTTCTCATGGCTCAGTGCACTGTGACTTGTTCTTCAGATTGTA	0.528571	0.471429	1.21424	1.43106	0.216817	-12.9	0.566533
main_Ndufa2_chr18:36742459-36742529_12184	Mouse 3' UTR GCLiPP Peak	No	chr18:36742459-36742529	Ndufa2	34	2393	1.00562	2457.89	CCTGCTGGACTGAAGACAGTGTGGGGAAATGTGTGCTTTGGGTCCTTATAAAGCTTACGCTGTACAGTGT	0.485714	0.514286	0.684141	0.865831	0.18169	-17.5	0.69509
main_Ppp1cc_chr5:122174658-122174728_19851	Mouse 3' UTR GCLiPP Peak	No	chr5:122174658-122174728	Ppp1cc	9	310	0.791834	250.717	GCCTGCCGCCAGCCCTGCCCAGACTATCTGAAGCACACTCCTTCCCACTGCACATTTAATAATGATTAAA	0.5	0.5	0.966944	1.17815	0.211211	-4.6	0.434881
main_Slc2a3_chr6:122729294-122729364_21684	Mouse 3' UTR GCLiPP Peak	No	chr6:122729294-122729364	Slc2a3	29	1370	0.920584	1288.17	TCAGGAGGAAAGAAAGTTTGGTGCTGGAGAGAGGTTACAACAGGGAGGATGGATGTTACTGGTGGCCTGT	0.5	0.5	0.17407	0.553113	0.379042	-11.8	0.476849
main_Urm1_chr2:29843399-29843469_13940	Mouse 3' UTR GCLiPP Peak	No	chr2:29843399-29843469	Urm1	40	1303	0.215021	286.163	CCTCCCAGCAGCTGAGGTGGGGGAGGGTGTTCCTGTGCTGTGTCAGGAGTAGAGGGGGCTCTGTGCCCAG	0.657143	0.342857	0.563845	0.836268	0.272423	-29.7	0.602563
main_Csnk1a1_chr18:61588885-61588955_12394	Mouse 3' UTR GCLiPP Peak	No	chr18:61588885-61588955	Csnk1a1	41	2244	0.908682	2082.68	TACAGTGTGAAGTTAGTGATTGTTGATCCTCAAGCCCCACCTCTCTAAGTACCTGTGCACGCTTCCCCCA	0.5	0.5	0.0619718	0.563887	0.501915	-8.2	0.452051
main_Eif3j2_chr2:122052758-122052828_14911	Mouse 3' UTR GCLiPP Peak	No	chr2:122052758-122052828	Eif3j2	44	2207	1.38798	3128.78	CAGCCTGTTTCTATTGATGGAGGACTTCATATGTGGGAGGGAACACTGTTTCTGTTTGCCTGATTCAAGT	0.442857	0.557143	0.631901	0.762465	0.130563	-11	0.450036
main_Cdkn2d_chr9:21288539-21288609_25360	Mouse 3' UTR GCLiPP Peak	No	chr9:21288539-21288609	Cdkn2d	7	253	2.83709	733.132	GTGAGCCATCTACTTTGGGCATGTGAGGGGGAAGGGAAAGCATTTCAAATCAATTAAAAGGATAACATGA	0.414286	0.585714	0.244592	0.619521	0.37493	-7.6	0.543587
main_Eif4e_chr3:138555642-138555712_16966	Mouse 3' UTR GCLiPP Peak	No	chr3:138555642-138555712	Eif4e	77	2388	1.40365	3423.59	TCATTCGCCTTTGTCTTGTACTTCTGTGTTCATTCTCCTCCCCCACCCCCAATTTTTGCTAGTGTGTCCA	0.471429	0.528571	1.23087	1.30518	0.0743099	-0.8	0.451288
main_Ppp1cc_chr5:122174130-122174200_19846	Mouse 3' UTR GCLiPP Peak	No	chr5:122174130-122174200	Ppp1cc	23	888	2.02651	1838.02	AAGCAAAGAAATAGATGTCACTTGACACTGCCTGGTTGGGACTTGTAACATAGCGTTCATAACCTTCCTT	0.414286	0.585714	1.65123	1.67331	0.0220845	-11.5	0.451935
main_Wdr6_chr9:108572377-108572447_26433	Mouse 3' UTR GCLiPP Peak	No	chr9:108572377-108572447	Wdr6	35	2000	1.14101	2330.81	CTCGGTTATAGTAGGAGCTGAAATCCATGCTGAGCTGCACCAGGAACTTGCATACCTAGAGACAGACGTT	0.485714	0.514286	1.41454	1.88651	0.471972	-11.6	0.358352
main_Atp1b3_chr9:96332973-96333043_26242	Mouse 3' UTR GCLiPP Peak	No	chr9:96332973-96333043	Atp1b3	45	2406	0.912935	2243.49	GACTCTGCTTCTGCGCATGTGTGAGTGGTGCCTGTCCGTATGCTCCAGACTGTTTCTTACAAGGTGAACT	0.514286	0.485714	0.41069	0.628408	0.217718	-10.4	0.471064
main_Hspa9_chr18:34937638-34937708_12090	Mouse 3' UTR GCLiPP Peak	No	chr18:34937638-34937708	Hspa9	3	168	0.443375	76.0797	GGCATCTGTATTCTTGATGATTGTTCCTTTTTCATCCACTCTGGATTTTTTAAATAAAATTCTGAAAGCC	0.328571	0.671429	0.570493	0.871028	0.300535	-9.6	0.473791
main_Mapre1_chr2:153768224-153768294_15284	Mouse 3' UTR GCLiPP Peak	No	chr2:153768224-153768294	Mapre1	12	598	1.86416	1138.6	GTACTGATTTGTTTCTGGTGGTAGCTTGTCTTATGCTGTGTGTAGGAAACAGGTATTTTATGACAGAATG	0.385714	0.614286	1.57623	1.58639	0.010169	-13.6	0.483212
main_Picalm_chr7:90207733-90207803_23077	Mouse 3' UTR GCLiPP Peak	No	chr7:90207733-90207803	Picalm	20	687	2.7648	1940.03	GCGGGATGGGACTAGTTTATAGGAGAGCGTTGTCAATACCACTTATAAAGCCAAGAATTGCCATGATTTA	0.414286	0.585714	1.84992	1.91879	0.0688732	-6.6	0.448166
main_Cnot7_chr8:40493636-40493706_24096	Mouse 3' UTR GCLiPP Peak	No	chr8:40493636-40493706	Cnot7	54	2015	2.39819	4935.67	TCCCTTTTCCTAAATTAACTAGCATTGAGTGTAATTTATTTCCCTCTTCCATGCCTCTCCTTCTATTCTG	0.371429	0.628571	1.84982	1.88948	0.039662	-2.6	0.609214
main_Eif4e_chr3:138556369-138556439_16975	Mouse 3' UTR GCLiPP Peak	No	chr3:138556369-138556439	Eif4e	11	245	2.60152	651	ACAATGGCTCAAGTAGAAAAGCGGTCCCATCCATATTAAGACAGTGTACAAAACTGTAAATAAAATGTGT	0.357143	0.642857	2.22641	2.22641	0	-9.8	0.384625
main_Asf1b_chr8:83969511-83969581_24469	Mouse 3' UTR GCLiPP Peak	No	chr8:83969511-83969581	Asf1b	19	700	2.03993	1458.48	CCAGGTCCAGAAGAATCATCTCACTTATGACCTACTGACCTCTAAAAAGCAGGTACTTGTATTGCTCATT	0.414286	0.585714	0.310676	0.610394	0.299718	-11	0.566745
main_Ypel3_chr7:126780378-126780448_23470	Mouse 3' UTR GCLiPP Peak	No	chr7:126780378-126780448	Ypel3	58	2293	0.592104	1386.73	TAAGGCCTGTGTGCTGCTCTCATGGCCCTGGTGCACCACCTTTCTGTGAATCTCTCCCACTGGATCCCTC	0.571429	0.428571	0.725254	0.904577	0.179324	-13.7	0.571986
main_Eif4ebp2_chr10:61432705-61432775_2043	Mouse 3' UTR GCLiPP Peak	No	chr10:61432705-61432775	Eif4ebp2	58	1674	0.692223	1183.56	CTCGCCCTTCTCATCGTCCGTCTGTCCGTCAGTCCGTCCGTCCTTCCCTCCCTCTCCCCTTAAATTCTTT	0.571429	0.428571	-0.0671831	0.560704	0.627887	-3.1	0.52477
main_Srebf2_chr15:82204582-82204652_9313	Mouse 3' UTR GCLiPP Peak	No	chr15:82204582-82204652	Srebf2	4	76	0.69052	53.6016	GGGTGGGAGGGAGGCAGGGGCAGGTCTAGGGATGGGTGAAAAATAATGTCGGCATTGTTTTTTAATTTTT	0.471429	0.528571	1.31376	1.4292	0.115437	-10.8	0.457576
main_Patz1_chr11:3308073-3308143_3186	Mouse 3' UTR GCLiPP Peak	No	chr11:3308073-3308143	Patz1	34	1751	0.705289	1261.37	TGTGTCCCCACAGAACAGCCGCTGGGGACTGCTGAGCAATGCTGTGAATGCAGAGGGAAGTGATGTCTTT	0.542857	0.457143	1.16925	1.41931	0.250056	-19.1	0.623935
main_Exosc6_chr8:111057526-111057596_24914	Mouse 3' UTR GCLiPP Peak	No	chr8:111057526-111057596	Exosc6	1	22	0.692545	15.5618	TCTTTTGAGAGGATGGACCAGGGGACTTTGCCTTCTCACTACTCAGAGTAAAACATAAAAACTATTTTAT	0.371429	0.628571	0.235366	0.739282	0.503915	-10.8	0.550904
main_BC005537_chr13:24813739-24813809_6954	Mouse 3' UTR GCLiPP Peak	No	chr13:24813739-24813809	BC005537	4	65	1.48453	98.5578	ACATAAGGAAAGACTACTGTATAGCTTTTACTTTTTTTGTTTTTGTTTTTTGTTTTTGTTTTTTTCTTTT	0.214286	0.785714	0.920662	1.15272	0.232056	-4.5	0.382144
main_Ier2_chr8:84661663-84661733_24507	Mouse 3' UTR GCLiPP Peak	No	chr8:84661663-84661733	Ier2	9	253	0.0869863	22.4781	GGGTGCTTCCTGTTGCCTTGCGTGGGTGTGGGGCCTGGGAGGAGGCCAGGGTGTGGACCCGCCCTAGGGA	0.7	0.3	0.815183	0.959915	0.144732	-30.3	0.466512
main_Prkar1a_chr11:109668895-109668965_5543	Mouse 3' UTR GCLiPP Peak	No	chr11:109668895-109668965	Prkar1a	25	837	2.40685	2057.61	TGTGTGCAAGTGGTTCTGATTAATAATTCCCTCCCTCCCTTTCCCAGTTAACTTAAATTGTTGGTTATGG	0.4	0.6	0.412465	0.687761	0.275296	-4.4	0.574711
main_Hn1l_chr17:24944125-24944195_10778	Mouse 3' UTR GCLiPP Peak	No	chr17:24944125-24944195	Hn1l	33	1686	1.07286	1847.53	CTTGTCCTTGTGTTAGCAGGCTGCTGGCTGTTGGGCATCTAAGTATGGTTTGGTTGAAAAAAACCCCACA	0.471429	0.528571	-0.176873	0.491803	0.668676	-19.1	0.537205
main_Tra2b_chr16:22246243-22246313_10138	Mouse 3' UTR GCLiPP Peak	No	chr16:22246243-22246313	Tra2b	10	287	2.56882	753.016	ACTCTGTACTGCTAGTATTAGAACAAAACTCTTCCCATACAGCAAATGCTTAATGCTTACATTAATGTGG	0.357143	0.642857	1.45101	1.4851	0.0340845	-10	0.402261
main_Tomm40_chr7:19701387-19701457_22356	Mouse 3' UTR GCLiPP Peak	No	chr7:19701387-19701457	Tomm40	6	105	0.370823	39.7689	GGCAGCAGAGGAGCGCCGAGCCGCCTGTCACTTCCCCCTCCACCCCTCCATAGAAATCATGTTTATAAGT	0.571429	0.428571	0.861958	1.24489	0.38293	-8.3	0.537482
main_Rcl1_chr19:29143742-29143812_13178	Mouse 3' UTR GCLiPP Peak	No	chr19:29143742-29143812	Rcl1	70	2915	1.34502	4004.56	CTTGTGTTTGTGTGGGCCTGGTGGTTGGGATGGGGAGGGCAGACATGTCTTAAATGTTTTCTGTATCCCA	0.5	0.5	-0.0406761	0.651352	0.692028	-21.5	0.665707
main_Phip_chr9:82869847-82869917_26182	Mouse 3' UTR GCLiPP Peak	No	chr9:82869847-82869917	Phip	6	457	2.69491	1257.91	CACTTTTTACGGTATCCTTATCAAGCTGGTATCTCAATATACACTCTAAAGAGAATCTCTCATTTAATGA	0.328571	0.671429	2.28435	2.31294	0.0285915	-5.8	0.643791
main_Ube2v1_chr2:167608715-167608785_15650	Mouse 3' UTR GCLiPP Peak	No	chr2:167608715-167608785	Ube2v1	1	31	0.0273046	0.864542	CTGCTGCTGGCCCTTGGCCTGGGTCTGCCTTTGCCCGCCCCGCCCTCCGCCACAGCTGTGTGGTGGCCCT	0.728571	0.271429	0.880958	1.00386	0.122901	-25.1	0.598383
main_Kras_chr6:145219716-145219786_22074	Mouse 3' UTR GCLiPP Peak	No	chr6:145219716-145219786	Kras	6	197	1.77452	357.056	TCCTAACTTTCAAGTCTTTTTTGAATTTCTGTTGTTGAAAGTAGTTTTAATGGTTGTGAAGCTGAAGATG	0.314286	0.685714	0.619408	0.802958	0.183549	-8.8	0.392169
main_Anp32e_chr3:95945421-95945491_16586	Mouse 3' UTR GCLiPP Peak	No	chr3:95945421-95945491	Anp32e	1	41	1.07354	44.9562	TTAATCATAATGTTCTTAGAAAAGAATTCTCATTCATCTTCCCATAGTGAAATTCTCTAGCACTGTATTT	0.285714	0.714286	0.915451	1.12745	0.212	-6.4	0.383331
main_Pcbp1_chr6:86524547-86524617_21268	Mouse 3' UTR GCLiPP Peak	No	chr6:86524547-86524617	Pcbp1	4	187	1.3534	258.498	TTTTGGCTCATGGATTTTATTTTCTGTTTGTCGATAAGAAATGTAAGAGTGGAATGTTAATAAATTTCAG	0.285714	0.714286	1.9782	1.9782	0	-10.3	0.448325
main_Kras_chr6:145219530-145219600_22073	Mouse 3' UTR GCLiPP Peak	No	chr6:145219530-145219600	Kras	42	2171	2.27421	5042.87	GCGACGCATTGTTTGGTCAACATAGGGGATAAGGAGACTTTGATGGCTTAGTATAATGCATTCTCACCAT	0.428571	0.571429	0.119718	0.454479	0.334761	-13.5	0.457114
main_Pnrc1_chr4:33245671-33245741_17209	Mouse 3' UTR GCLiPP Peak	No	chr4:33245671-33245741	Pnrc1	6	251	0.799231	204.896	GGTACCGAAATTTTTTTAAGAACAGCTGTCAAATCTCAAAAGTGAAGATGTAACTGTGAACAATTTCCTT	0.328571	0.671429	1.22987	1.30728	0.0774085	-5.9	0.532589
main_Map4k4_chr1:40025240-40025310_182	Mouse 3' UTR GCLiPP Peak	No	chr1:40025240-40025310	Map4k4	1	32	0.105805	3.45817	TCTCTTTTTGTAATGTGACAGTATGTGGACAGAGAAGAAGGTGCAGGTTTAAGAAGTTAATATTTATAAA	0.314286	0.685714	1.589	1.589	0	-6.4	0.579808
main_Cnih1_chr14:46776125-46776195_7938	Mouse 3' UTR GCLiPP Peak	No	chr14:46776125-46776195	Cnih1	21	1123	1.64766	1889.89	CCGTTGGAAGCTTGGTTTAGAGGACTTGTTGGGCTCATTTTGGTTTTATTGAAATGCCATCTAAATATGT	0.385714	0.614286	1.3559	1.35661	0.000704225	-8.1	0.493651
main_Sumo3_chr10:77616250-77616320_2204	Mouse 3' UTR GCLiPP Peak	No	chr10:77616250-77616320	Sumo3	33	1203	0.409501	503.163	GCTATTGAGCAGTGACCATGCAGCCACACCCAATCACACAAGAGTCAGCAGAAGCCAGAGTCACCGAAGG	0.542857	0.457143	0.218324	0.60162	0.383296	-9	0.349208
main_Dnm1l_chr16:16313846-16313916_10008	Mouse 3' UTR GCLiPP Peak	No	chr16:16313846-16313916	Dnm1l	7	217	1.45885	323.339	ACTTTTGTGTATTGCAGTGTATGAATTTGCTCGTGTGAAGACTGGCTATAAGCTGAAAAGTATATTATTC	0.342857	0.657143	1.05746	1.16386	0.106394	-10.4	0.487663
main_Ly6e_chr15:74958792-74958862_8854	Mouse 3' UTR GCLiPP Peak	No	chr15:74958792-74958862	Ly6e	34	1152	0.814849	958.777	CTTCAGCTCCTCCTGGGTGTGTCTAGTTCCCCCTCCACACTCTCTCAACGTCAGGGCTAAGTACCAAACT	0.542857	0.457143	-0.0799296	0.424859	0.504789	-12.5	0.544781
main_Khsrp_chr17:57021805-57021875_11660	Mouse 3' UTR GCLiPP Peak	No	chr17:57021805-57021875	Khsrp	50	1242	1.20356	1526.78	ACCATTCCTGTCTCTCCCTCTCTGCAGGCAAATGAAGCAAATGGATATGAACTTCATCTGTGAAAATATT	0.4	0.6	1.86441	1.94193	0.0775211	-8.6	0.431782
main_Cmtm6_chr9:114747157-114747227_26552	Mouse 3' UTR GCLiPP Peak	No	chr9:114747157-114747227	Cmtm6	15	673	1.43883	989.036	TTGTGGAGGCTTTTACATTGCACTGTGATTGCTGAGATTAAGTTTAGAAGAAAATGAAGTTATGTAACAC	0.342857	0.657143	0.247451	0.606662	0.359211	-9	0.570305
main_Eif4ebp2_chr10:61433720-61433790_2046	Mouse 3' UTR GCLiPP Peak	No	chr10:61433720-61433790	Eif4ebp2	52	1864	0.438661	835.148	CCATGTGGAAGGAGGCCTCGTGGAGCAGCCTGTGTGCACCTGACTGGCCCAGTAGGAACACAGTGTACAG	0.6	0.4	0.123901	0.763789	0.639887	-22.1	0.456276
main_Rnf44_chr13:54679671-54679741_7246	Mouse 3' UTR GCLiPP Peak	No	chr13:54679671-54679741	Rnf44	35	1386	2.39948	3396.79	TTTGGGGGCCCTGTTCCTTGCACATCTTACAGTTACCTCATTTTTCCCATGTATGTATTTGAGAAAATGC	0.414286	0.585714	2.39393	2.41196	0.0180282	-11	0.461211
main_2410016O06Rik_chr12:83952845-83952915_6359	Mouse 3' UTR GCLiPP Peak	No	chr12:83952845-83952915	2410016O06Rik	45	2274	0.906	2104.3	CTTGGGTTCTATTTCATCAGTTTGCGGGGCTGAGCTGGGGTCAGTGTGCTGCGCGTTAAGTTTGTATGAA	0.5	0.5	0.934282	0.974338	0.0400563	-17.4	0.550332
main_Ppp2ca_chr11:52122553-52122623_3796	Mouse 3' UTR GCLiPP Peak	No	chr11:52122553-52122623	Ppp2ca	16	614	2.42353	1519.86	AAGATGATGTTACTGCACAAGTCACCGCAGTGTTTTCATAATAAACTTGAGAACTGAGAAAGTCAGGTTT	0.371429	0.628571	2.1651	2.18614	0.0210423	-15.1	0.42679
main_Sft2d2_chr1:165178886-165178956_1336	Mouse 3' UTR GCLiPP Peak	No	chr1:165178886-165178956	Sft2d2	14	490	0.60633	303.454	CAGGAGCAACTGATTCCCAGGTGGCAGCAGGAAGGTCTAGCAGGGCTTCTAGCGGAGCAGCAGGAAGTAC	0.585714	0.414286	-0.0507183	0.561761	0.612479	-17.6	0.680075
main_Mrpl17_chr7:105809324-105809394_23248	Mouse 3' UTR GCLiPP Peak	No	chr7:105809324-105809394	Mrpl17	41	1883	0.689112	1325.34	AGACCAGGTTGGCCTTGAACTAAGCGATCCACCTGCCTCTGCCTCCTCAGTACTAGGATTAAAGGTATGG	0.514286	0.485714	0.136028	0.306761	0.170732	-12.4	0.616484
main_Pspc1_chr14:56722808-56722878_8104	Mouse 3' UTR GCLiPP Peak	No	chr14:56722808-56722878	Pspc1	9	330	1.83396	618.148	TGACCTTAGCTAACGATAGCTATGTGGCATTATTATTAAGTCTGTGTAGTTACTTAATCTCAATAAAGAA	0.314286	0.685714	1.36756	1.43018	0.0626197	-9.3	0.469222
main_Hmgcs1_chr13:119707307-119707377_7631	Mouse 3' UTR GCLiPP Peak	No	chr13:119707307-119707377	Hmgcs1	27	1249	1.82029	2322.16	TCCAGTTTATAGACTGACAGCTTCAATTCACGGGACACCTTTTTTCCTTTGTGGTTTGTGTATTTCTGTG	0.4	0.6	-0.162958	0.736479	0.899437	-12.5	0.451881
main_Cenpa_chr5:30674377-30674447_19013	Mouse 3' UTR GCLiPP Peak	No	chr5:30674377-30674447	Cenpa	28	1417	0.720403	1042.64	CTGAATAAAGCGCTTGAATCTGTTGTATGTGAGCCGTGGCAGTCCCGCCATATAAATGCCTGCCTTCCAG	0.5	0.5	-0.202775	0.508549	0.711324	-9	0.597784
main_Cited2_chr10:17725043-17725113_1775	Mouse 3' UTR GCLiPP Peak	No	chr10:17725043-17725113	Cited2	14	467	1.16363	555.036	TGGTCTTTTTTGTTGTTTGTTTTTACTCCTTTATTTCCTCACTTTCTCCCGTGCTCAACTGTTAGATATT	0.342857	0.657143	1.85727	1.86515	0.00788732	-3.5	0.547102
main_Psrc1_chr3:108388083-108388153_16821	Mouse 3' UTR GCLiPP Peak	No	chr3:108388083-108388153	Psrc1	10	319	1.003	326.797	ATGAATTCTTTGACTTCTCACAGGTCAATCAGTTATAAGCTTACTCACATCTTCATATTTTTTCTTAAAT	0.285714	0.714286	0.901535	1.02742	0.125887	-6.5	0.545098
main_Eef1d_chr15:75895485-75895555_8882	Mouse 3' UTR GCLiPP Peak	No	chr15:75895485-75895555	Eef1d	10	429	1.27065	556.765	TGAATGTCCGAGAGAGTGTGGTTTCATGTGTGTGAGGACCTGCTGAGATTAAAGACTGAGACTCTGCACT	0.471429	0.528571	0.0567887	0.882225	0.825437	-12.9	0.599749
main_Ahcyl1_chr3:107664506-107664576_16801	Mouse 3' UTR GCLiPP Peak	No	chr3:107664506-107664576	Ahcyl1	68	4007	1.60712	6577.44	TGCTTGTTCAACTCAGTAGGTTCACTTGGGTTTGTAGTCCAGCCTTCCACCAGTCTCTCTCATTGTTCTA	0.457143	0.542857	0.648014	0.725845	0.077831	-5.6	0.503133
main_Rsrp1_chr4:134927142-134927212_18264	Mouse 3' UTR GCLiPP Peak	No	chr4:134927142-134927212	Rsrp1	29	780	1.15355	919.008	GTGATTAAAATCCATTACAGAAAGAGACTTAATGGGGACGTTCATGGTTGAGGTTTCTCTTGAAGATAGG	0.385714	0.614286	0.396563	0.65538	0.258817	-11.4	0.381606
main_Tmbim6_chr15:99409746-99409816_9657	Mouse 3' UTR GCLiPP Peak	No	chr15:99409746-99409816	Tmbim6	68	3183	0.560307	1821.59	CGAGCCCTCGGGACATGACTGAGTTCCACCTCCTGAAGCCAGACTCCACCTCTTGTGCTTTTTTGCTTGG	0.557143	0.442857	1.11955	1.25549	0.135944	-13.7	0.492856
main_Med13l_chr5:118764279-118764349_19781	Mouse 3' UTR GCLiPP Peak	No	chr5:118764279-118764349	Med13l	3	93	1.86582	177.231	GGTGACTGTTCTCTGTCTCACCAACTGGGGGGGTTGCTTTCCAATGTATAGCTTAAAAAATCTGATATAT	0.414286	0.585714	1.49076	1.62493	0.134169	-12.3	0.487332
main_Tma7_chr9:109078220-109078290_26476	Mouse 3' UTR GCLiPP Peak	No	chr9:109078220-109078290	Tma7	13	678	1.72035	1191.34	GAAGTGTTATCCTGTGACCAGTCAAACATCTGGATTCCCTGTCATAACATCTTTGCCATGTAATAGCTAG	0.414286	0.585714	0.184592	0.531465	0.346873	-9.8	0.50921
main_Slc25a3_chr10:91116918-91116988_2703	Mouse 3' UTR GCLiPP Peak	No	chr10:91116918-91116988	Slc25a3	14	498	3.05264	1552.72	GAAGAAGCTTGGGTTAACTGAGTAGATACATCAAAGTAACATGGACTGAATCTGCTTGTTGATCAGTGTT	0.385714	0.614286	1.38242	1.47817	0.0957465	-16.2	0.421407
main_Csf2ra_chr19:61224456-61224526_13578	Mouse 3' UTR GCLiPP Peak	No	chr19:61224456-61224526	Csf2ra	45	2416	0.666014	1643.49	ACACACACACACACACACACACAGACACAAACTGTCATAAAATCCAACGTGCCTTCATGATCAAAGTTCG	0.428571	0.571429	0	0	0	-3.6	0.597804
main_Purb_chr11:6473220-6473290_3380	Mouse 3' UTR GCLiPP Peak	No	chr11:6473220-6473290	Purb	6	202	0.951201	196.251	TAATGTTCTTTCCAAAGTTTTTCAGGTATCTGTGTGACACCTTCTCAAGAACCAGGAGGCAAGTAACCCC	0.428571	0.571429	1.83715	1.84938	0.0122254	-9.6	0.546232
main_Glrx5_chr12:105040708-105040778_6555	Mouse 3' UTR GCLiPP Peak	No	chr12:105040708-105040778	Glrx5	28	1270	1.81086	2348.96	TTTGGGAGTCACTTCTGATTCTTGTTTGGGTTGTAGAGATGGTAAAGCCCCCTGATGTTTTTGTAACTTC	0.414286	0.585714	-0.0830282	0.577535	0.660563	-12.8	0.46307
main_Dcaf12_chr4:41292946-41293016_17274	Mouse 3' UTR GCLiPP Peak	No	chr4:41292946-41293016	Dcaf12	39	2135	1.09146	2380.08	CTTCCACCCTCAGTTTCCTTGTTTGATTTCCCTAGCTGTGGAAGGCTCTCCTGTCTATGCAAACAGAGTT	0.471429	0.528571	0.752606	0.892239	0.139634	-13.5	0.572741
main_Skp1a_chr11:52245991-52246061_3799	Mouse 3' UTR GCLiPP Peak	No	chr11:52245991-52246061	Skp1a	63	2837	1.33098	3856.72	AAGAGAACCAATGGTGTGAAGAGAAGTGAACTGCTGTGCCTGTCACTGTAACACTAGAAGGGTTGTTCCA	0.457143	0.542857	1.95911	1.96956	0.0104507	-16.7	0.381164
main_Stt3a_chr9:36732740-36732810_25499	Mouse 3' UTR GCLiPP Peak	No	chr9:36732740-36732810	Stt3a	12	397	1.27926	518.725	CTGCAAGTTTTGCCCTGGACAATATGGGCTGGGCCAAGTGAAATGATTTTTATAATTCTGAGCAGGTTAC	0.428571	0.571429	1.61185	1.69939	0.0875493	-14.4	0.478429
main_Atxn7l3b_chr10:112927200-112927270_2855	Mouse 3' UTR GCLiPP Peak	No	chr10:112927200-112927270	Atxn7l3b	62	3289	1.03303	3470.27	CTCTGCTGTGCTGATTGAGACTGTCTCCACCTTCTCTGCCCTCACAAACAGCAGTTCATCACTTGGTCCT	0.514286	0.485714	0.317549	0.797408	0.479859	-14	0.571066
main_Gna13_chr11:109398769-109398839_5504	Mouse 3' UTR GCLiPP Peak	No	chr11:109398769-109398839	Gna13	30	1166	0.203988	242.936	CCTAACCCTCCGTGTGCTGACTTCTCCCTCCTGGCCCCTGAGCCATGCCTTGGAGCTGAGGCTCTGTGGG	0.642857	0.357143	0.138634	0.730296	0.591662	-17.2	0.689128
main_Hnrnpk_chr13:58391449-58391519_7350	Mouse 3' UTR GCLiPP Peak	No	chr13:58391449-58391519	Hnrnpk	3	45	1.24145	57.0598	TTTTGTTAGATAATTTCTCACCTATAGACTTAAAGCTGTCAACCTGCTAGTGTCTTGTTAGTTGAACTTT	0.328571	0.671429	1.71818	1.72585	0.00766197	-8.6	0.30619
main_Cldnd1_chr16:58733474-58733544_10474	Mouse 3' UTR GCLiPP Peak	No	chr16:58733474-58733544	Cldnd1	15	680	0.902458	626.793	TTGCTAGCAGAACCAGCGTTCCTCAAGATGTGTGCACATAAAATTGGGAAATGAGCTAACATGTGTCCCT	0.442857	0.557143	0.378085	0.719746	0.341662	-11.7	0.58004
main_Pole3_chr4:62523794-62523864_17461	Mouse 3' UTR GCLiPP Peak	No	chr4:62523794-62523864	Pole3	1	17	3.53515	61.3825	CAAGGCAGAGCCATCTTCGGCACTGGTGCCTGAGATCAAAATAAAAGCTGACCAGAAAGATCAAAAAGAA	0.442857	0.557143	0.372056	0.607634	0.235577	-12.3	0.5632
main_Hdgf_chr3:87915595-87915665_16215	Mouse 3' UTR GCLiPP Peak	No	chr3:87915595-87915665	Hdgf	56	2155	1.1701	2575.47	CTTCATCTACTTCCCAATGCTTGAGGCCAGCCTGTAGTCAGATATTTCACCCAGACATAAAGGAAAAGAC	0.442857	0.557143	0.954394	1.24575	0.291352	-7.3	0.502705
main_Tcf25_chr8:123401284-123401354_25158	Mouse 3' UTR GCLiPP Peak	No	chr8:123401284-123401354	Tcf25	21	905	0.792196	732.267	TTCTGGTTGGAGTTAACCAGTTCCGAGTAGAAATGCTGACCATGCCATCACCCGTGTCTTTTGTTTTCCC	0.471429	0.528571	0.0221268	0.635225	0.613099	-13.1	0.64377
main_Znrf2_chr6:54888640-54888710_20931	Mouse 3' UTR GCLiPP Peak	No	chr6:54888640-54888710	Znrf2	32	1348	1.55223	2137.15	TTTGAAAATGCTGCACAGCCTGTACCAGTCACTGCGTAGATGACACTGATAAATGTTTTGTATTCAGACG	0.414286	0.585714	1.49638	1.53528	0.0389014	-10	0.529673
main_Utp18_chr11:93859991-93860061_4821	Mouse 3' UTR GCLiPP Peak	No	chr11:93859991-93860061	Utp18	5	295	0.852182	256.769	TGAAAAATCCCATCTCAGTACATCTTCCCAGAAGTTTCCAAGTGTGATAATATATGAATAATGATTTGTG	0.328571	0.671429	0.376563	0.675408	0.298845	-3.5	0.392883
main_Slc25a51_chr4:45397910-45397980_17348	Mouse 3' UTR GCLiPP Peak	No	chr4:45397910-45397980	Slc25a51	39	1756	0.644473	1155.89	CCAGGGCCTTGCACATCCTAGGCAAATGCTGTCCCACTACACTCCAGCCTTCCCAGTTTTGGTTTTATTT	0.5	0.5	0.0852394	0.573803	0.488563	-9.6	0.783486
main_Pole3_chr4:62523410-62523480_17460	Mouse 3' UTR GCLiPP Peak	No	chr4:62523410-62523480	Pole3	26	1176	0.801818	963.1	GCTCTCTAGGAGATGACTAAGGAGCTGTGAGCGAGCGAACGAGGAAATGTCTTCACCTGATGGTAGCATT	0.5	0.5	-0.0337887	0.640239	0.674028	-15.2	0.615445
main_Ss18_chr18:14627075-14627145_11969	Mouse 3' UTR GCLiPP Peak	No	chr18:14627075-14627145	Ss18	36	1262	1.66539	2146.66	CAGCAAGTAGCTGTTATGGTTTAGTTTGTAAAGGCTTCGTAGCTACCGATGCACCTGATTTCACGTTTCT	0.428571	0.571429	1.60866	1.66954	0.0608732	-12.6	0.485001
main_Metap2_chr10:93860384-93860454_2738	Mouse 3' UTR GCLiPP Peak	No	chr10:93860384-93860454	Metap2	19	672	1.09206	749.558	GGTTACTCAAGGAGATGAGGTTCGAGACCTTTCATAAACTGTGTGTTAATTTGAACATAAAGACACATTC	0.371429	0.628571	0.208803	0.653169	0.444366	-9.9	0.658264
[truncated: 13,909 more rows]

## Sheet: README
This table summarizes the Th2 minus PMA Ionomycin FastUTR experiment. Peakname indicates name of library insert. Type indicates the sublibrary the peak was included with. Rapidly evolving shows whether the average PhyloP of the mouse genome for this locus was < 0. Locus indicates the location in the mm10 assembly of the mouse genome. N barcodes indicates the total number of unique molecular barco…
