# Supplementary material for: A massively parallel 3′ UTR reporter assay reveals relationships between nucleotide content, sequence conservation, and mRNA destabilization
Source: HighWire-hosted journal article supplement (doi:10.1101/gr.242552.118), 2019-05-31
Supplement: Supplemental_Table_2.xlsx [file Supplemental_Table_2.xlsx]

## Sheet: Table 2
Gene	GC_mean	GC_std	N	Keep	Conservation_score	Rapid_evolution_score	Strictly_conserved	Rapidly_evolving
A1BG	0.491747	0.0956881	4	Yes	0.000390076	7.43016	No	Yes
AACS	0.44947	0.0712853	6	Yes	0.861216	0.534251	No	No
AADAC	0.298242	0.0480417	5	Yes	0.86786	0.510523	No	No
AADAT	0.31192	0.00871664	4	Yes	1.32722	0.282988	No	No
AAED1	0.389711	0.0803379	5	Yes	1.20185	0.34281	No	No
AAGAB	0.473283	0.064501	4	Yes	0.504477	0.89794	No	No
AAMDC	0.374492	0.0566081	4	Yes	1.49155	0.236083	No	No
AAMP	0.521962	0.0285411	5	Yes	2.2199	0.108111	No	No
AANAT	0.606759	0.0272933	5	Yes	0.185292	1.69771	No	No
AAR2	0.441657	0.0587239	4	Yes	2.31311	0.0985849	No	No
AARS	0.547753	0.0475947	5	Yes	0.164081	1.78238	No	No
AARS2	0.545147	0.0279793	4	Yes	0.000114507	8.889	No	Yes
AARSD1	0.439496	0.0409176	5	Yes	1.10607	0.38877	No	No
AASDHPPT	0.311562	0.0396687	5	Yes	0.681289	0.689376	No	No
AASS	0.323047	0.0332201	6	Yes	1.23458	0.334976	No	No
AATF	0.46129	0.071149	5	Yes	0.460122	0.954058	No	No
ABAT	0.409589	0.051101	4	Yes	2.73066	0.0648707	No	No
ABCA1	0.410699	0.0539809	4	Yes	5.15938	0.00535773	Yes	No
ABCA4	0.465443	0.0149708	4	Yes	0.0166608	3.92094	No	Yes
ABCA5	0.387433	0.0584952	4	Yes	1.73258	0.188592	No	No
ABCB6	0.45275	0.0281434	5	Yes	0.941109	0.479554	No	No
ABCB9	0.506161	0.137985	4	Yes	2.57791	0.0730757	No	No
ABCC2	0.364015	0.0759361	5	Yes	5.70002e-06	11.8839	No	Yes
ABCC3	0.404452	0.0691893	4	Yes	0.0191749	3.842	No	Yes
ABCC5	0.421151	0.0684656	4	Yes	13.8008	9e-07	Yes	No
ABCD1	0.519352	0.163154	5	Yes	0.0016733	6.28627	No	Yes
ABCD2	0.279621	0.113174	5	Yes	0.000594076	7.34839	No	Yes
ABCD3	0.373453	0.0273216	4	Yes	8.68827	0.000149411	Yes	No
ABCE1	0.355648	0.0364342	7	Yes	0.16631	1.84281	No	No
ABCF1	0.508751	0.0646027	4	Yes	0.435	0.994472	No	No
ABCF3	0.523604	0.058777	5	Yes	1.08915	0.390287	No	No
ABCG1	0.461456	0.0499608	4	Yes	0.868754	0.531048	No	No
ABCG2	0.344796	0.0685345	7	Yes	0.98323	0.44792	No	No
ABCG5	0.409206	0.104447	6	Yes	0.333114	1.21511	No	No
ABHD1	0.379864	0.0358282	4	Yes	3.91423	0.0106851	Yes	No
ABHD11	0.454031	0.0651746	4	Yes	1.5196	0.237897	No	No
ABHD12	0.524989	0.0813018	7	Yes	1.07385	0.409381	No	No
ABHD13	0.330092	0.0514559	5	Yes	0.160843	1.88272	No	No
ABHD14B	0.451607	0.106223	6	Yes	0.508959	0.894293	No	No
ABHD16A	0.427407	0.0340349	5	Yes	1.60241	0.209377	No	No
ABHD16B	0.538081	0.0757085	5	Yes	0.0299369	3.27064	No	Yes
ABHD17A	0.558515	0.114282	5	Yes	0.837332	0.516379	No	No
ABHD17B	0.320671	0.0452732	6	Yes	38.7559	0	Yes	No
ABHD17C	0.381355	0.0253864	7	Yes	36.0029	0	Yes	No
ABHD18	0.373762	0.0193015	6	Yes	2.27729	0.104537	No	No
ABHD2	0.511564	0.083067	5	Yes	2.78094	0.0618988	No	No
ABHD3	0.339299	0.0582422	5	Yes	6.20358	0.00179391	Yes	No
ABHD4	0.497106	0.0786749	4	Yes	1.90509	0.152584	No	No
ABHD5	0.41711	0.11331	6	Yes	0.628161	0.746921	No	No
ABHD6	0.463236	0.0131999	5	Yes	0.9126	0.49059	No	No
ABHD8	0.607849	0.105403	6	Yes	0.489864	0.907181	No	No
ABRA	0.32618	0.0292431	5	Yes	1.51873	0.235776	No	No
ABRACL	0.311384	0.0255623	8	Yes	2.08794	0.12681	No	No
ABT1	0.411113	0.0383556	5	Yes	0.000313649	7.9989	No	Yes
ABTB1	0.544727	0.0853032	5	Yes	1.49972	0.244991	No	No
ABTB2	0.514076	0.0214008	4	Yes	0.00119391	6.62188	No	Yes
ACAA1	0.469267	0.116046	5	Yes	2.375	0.092241	No	No
ACAA2	0.413802	0.0437724	8	Yes	2.46004	0.0841294	No	No
ACACA	0.476319	0.0678818	4	Yes	0.5358	0.858591	No	No
ACACB	0.48891	0.0680638	4	Yes	0.000363366	7.81862	No	Yes
ACAD11	0.375531	0.0587457	4	Yes	0.00163874	6.28182	No	Yes
ACAD8	0.441415	0.0803809	5	Yes	0.115651	2.16999	No	No
ACAD9	0.4482	0.109428	7	Yes	0.109882	2.2258	No	No
ACADL	0.357636	0.0478403	7	Yes	2.53528	0.0785075	No	No
ACADM	0.36529	0.043808	4	Yes	0.302731	1.29291	No	No
ACADS	0.534983	0.114181	7	Yes	0.00363319	5.53481	No	Yes
ACADSB	0.430784	0.0785286	6	Yes	0.735271	0.639079	No	No
ACADVL	0.465822	0.0400084	4	Yes	1.38112	0.258008	No	No
ACAN	0.546739	0.0788841	5	Yes	1.57216	0.215692	No	No
ACAP1	0.563109	0.120629	5	Yes	0.57407	0.787939	No	No
ACAP2	0.357058	0.0462015	6	Yes	0.02733	3.56814	No	Yes
ACAP3	0.565749	0.113858	5	Yes	1.92978	0.149841	No	No
ACAT1	0.390031	0.0524813	8	Yes	0.110741	2.21957	No	No
ACAT2	0.389226	0.0330221	5	Yes	1.10289	0.38517	No	No
ACBD3	0.393963	0.0547758	6	Yes	24.1129	0	Yes	No
ACBD4	0.491777	0.120591	5	Yes	0.730998	0.625298	No	No
ACBD5	0.422142	0.0468396	4	Yes	1.42705	0.263633	No	No
ACBD6	0.405509	0.084903	6	Yes	4.26627	0.0133804	Yes	No
ACBD7	0.360839	0.040784	7	Yes	0.0752532	2.59001	No	No
ACER1	0.410041	0.127699	4	Yes	0.985717	0.451411	No	No
ACER3	0.409792	0.0422036	5	Yes	0.190093	1.72731	No	No
ACHE	0.562102	0.124276	4	Yes	1.99431	0.13097	No	No
ACKR3	0.414534	0.039306	6	Yes	1.00012	0.435018	No	No
ACO1	0.429061	0.0639166	6	Yes	0.258746	1.43987	No	No
ACO2	0.450347	0.0748459	8	Yes	1.63898	0.206427	No	No
ACOT13	0.370974	0.0244698	6	Yes	0.808015	0.569288	No	No
ACOT2	0.357081	0.038706	5	Yes	0.0144463	4.14551	No	Yes
ACOT6	0.374467	0.0527059	4	Yes	0.355225	1.0346	No	No
ACOT8	0.490207	0.0932437	6	Yes	1.29371	0.297909	No	No
ACOT9	0.386404	0.0274406	4	Yes	3.92983	0.0186873	Yes	No
ACOX1	0.380754	0.0516148	6	Yes	3.60348	0.0261269	Yes	No
ACOX2	0.381412	0.0455527	4	Yes	0.0382563	3.14079	No	Yes
ACP2	0.484799	0.0490405	5	Yes	2.22333	0.110528	No	No
ACP5	0.544718	0.082596	4	Yes	0.204032	1.64065	No	No
ACP6	0.334397	0.0873283	6	Yes	2.10886	0.119131	No	No
ACSBG1	0.475737	0.0544307	4	Yes	0.765132	0.596972	No	No
ACSL1	0.417159	0.0279077	4	Yes	9.70995	5.38014e-05	Yes	No
ACSS1	0.44366	0.0680791	4	Yes	0.524779	0.867953	No	No
ACSS2	0.456204	0.0648658	5	Yes	2.4865	0.0812751	No	No
ACSS3	0.348208	0.0123228	4	Yes	0	0	No	No
ACTA1	0.452228	0.0812276	4	Yes	1.40206	0.252252	No	No
ACTA2	0.364819	0.169046	6	Yes	1.38652	0.276103	No	No
ACTB	0.418895	0.022405	7	Yes	17.6239	0	Yes	No
ACTC1	0.39474	0.0215118	6	Yes	4.02752	0.0169501	Yes	No
ACTG1	0.423918	0.0210551	4	Yes	11.4888	8.40004e-06	Yes	No
ACTG2	0.531384	0.0891329	4	Yes	1.65707	0.165283	No	No
ACTL6A	0.328594	0.0304336	5	Yes	9.25198	8.31035e-05	Yes	No
ACTL6B	0.533821	0.0562853	4	Yes	0.000216323	7.93404	No	Yes
ACTL7A	0.535802	0.0388375	4	Yes	0.000259334	7.66408	No	Yes
ACTL7B	0.515568	0.0321977	4	Yes	0.48179	0.763759	No	No
ACTL9	0.610595	0.0835352	5	Yes	0.102787	1.95493	No	No
ACTN1	0.482449	0.143891	5	Yes	13.5431	1.1e-06	Yes	No
ACTN2	0.389213	0.0560809	5	Yes	1.26542	0.298363	No	No
ACTN3	0.496447	0.101517	4	Yes	0.967519	0.457471	No	No
ACTN4	0.544157	0.11784	6	Yes	4.62949	0.00906506	Yes	No
ACTR10	0.35881	0.0467142	7	Yes	0.906476	0.505795	No	No
ACTR1A	0.519783	0.0566784	8	Yes	12.9315	2.1e-06	Yes	No
ACTR1B	0.559836	0.0226324	5	Yes	0.0663876	2.65743	No	No
ACTR2	0.382441	0.0262838	6	Yes	6.68818	0.00115727	Yes	No
ACTR5	0.449501	0.0798077	4	Yes	0.713772	0.638953	No	No
ACTR6	0.298536	0.0489728	6	Yes	1.11007	0.373503	No	No
ACTR8	0.325702	0.03829	5	Yes	1.40368	0.27038	No	No
ACTRT2	0.525522	0.0412352	4	Yes	0.0114804	4.00603	No	Yes
ACVR1	0.424406	0.0628143	4	Yes	25.8214	0	Yes	No
ACVR2A	0.41061	0.0736687	5	Yes	20.1413	0	Yes	No
ACVR2B	0.388868	0.0744188	6	Yes	2.28982	0.104899	No	No
ACYP1	0.340377	0.100224	6	Yes	1.1358	0.364212	No	No
ACYP2	0.28594	0.04805	5	Yes	2.18773	0.113897	No	No
ADA	0.426072	0.0844077	4	Yes	4.03191	0.0167595	Yes	No
ADAD1	0.295636	0.0522356	4	Yes	2.16205	0.114118	No	No
ADAL	0.359538	0.0766343	5	Yes	1.56251	0.223527	No	No
ADAM10	0.36638	0.0171347	5	Yes	63.9585	0	Yes	No
ADAM17	0.427839	0.0454945	4	Yes	1.83863	0.167218	No	No
ADAM23	0.38537	0.0367732	5	Yes	16.3954	1e-07	Yes	No
ADAM7	0.397198	0.0208446	4	Yes	0.0434626	3.08809	No	Yes
ADAM9	0.342764	0.0741585	5	Yes	3.37572	0.0329419	Yes	No
ADAMTS1	0.389923	0.0211433	6	Yes	3.60856	0.0256262	Yes	No
ADAMTS10	0.598218	0.0785437	4	Yes	1.0406	0.410721	No	No
ADAP2	0.516604	0.021666	4	Yes	0.000209822	8.25962	No	Yes
ADAT1	0.415556	0.0525257	7	Yes	1.6e-06	13.256	No	Yes
ADAT2	0.458495	0.0783268	5	Yes	0.044093	3.06115	No	Yes
ADCK1	0.430731	0.131408	6	Yes	0.245642	1.48039	No	No
ADCK2	0.481059	0.032664	4	Yes	0.151672	1.87092	No	No
ADCY2	0.473493	0.0169479	4	Yes	8.18907	0.000235128	Yes	No
ADCY5	0.543334	0.0749845	6	Yes	0.346312	1.18657	No	No
ADCY6	0.549979	0.0149116	4	Yes	17.2809	0	Yes	No
ADCY7	0.423212	0.0587041	4	Yes	0.382625	1.12209	No	No
ADCY8	0.199847	0.0955451	5	Yes	7.81113	0.000295144	Yes	No
ADD1	0.457699	0.0821891	5	Yes	1.57563	0.224235	No	No
ADGB	0.313395	0.0360257	4	Yes	0.331109	1.15457	No	No
ADGRF5	0.40308	0.0301273	4	Yes	1.22298	0.3393	No	No
ADGRL3	0.384706	0.0389878	4	Yes	8.22718	0.000192719	Yes	No
ADGRL4	0.325108	0.0401689	5	Yes	2.40751	0.0897414	No	No
ADH5	0.375066	0.0458868	7	Yes	1.11364	0.384875	No	No
ADHFE1	0.387824	0.0219373	6	Yes	0.515146	0.886612	No	No
ADI1	0.44673	0.0549016	5	Yes	0.0244249	3.65875	No	Yes
ADIPOQ	0.42356	0.0718243	5	Yes	0.00242945	5.88904	No	Yes
ADIPOR1	0.403645	0.0569513	5	Yes	6.92408	0.000907111	Yes	No
ADIPOR2	0.456609	0.0460928	7	Yes	5.07308	0.00593417	Yes	No
ADK	0.371262	0.0457504	5	Yes	2.84101	0.055738	No	No
ADM	0.481573	0.0283163	5	Yes	7.08324	0.000660318	Yes	No
ADM2	0.590982	0.0659057	4	Yes	0.0157299	4.05807	No	Yes
ADNP2	0.370789	0.0464311	5	Yes	0.428899	1.02086	No	No
ADO	0.432726	0.0624474	4	Yes	0.0768954	2.52792	No	No
ADORA1	0.541599	0.133965	6	Yes	1e-07	15.7899	No	Yes
ADORA2A	0.484578	0.0673161	4	Yes	0.123875	2.08165	No	No
ADORA2B	0.425772	0.038196	6	Yes	0.122358	2.09807	No	No
ADORA3	0.457976	0.0136575	4	Yes	0.255718	1.43307	No	No
ADPGK	0.43673	0.00792587	4	Yes	2.08952	0.12459	No	No
ADPRH	0.391598	0.0809372	5	Yes	0.611708	0.760196	No	No
ADPRHL2	0.490769	0.0905965	7	Yes	1.0029	0.443298	No	No
ADPRM	0.349108	0.0485718	7	Yes	0.618665	0.737313	No	No
ADRA1B	0.671936	0.0633584	4	Yes	3.03167	0.04094	Yes	No
ADRA2A	0.464134	0.0349947	4	Yes	7.49631	0.000499625	Yes	No
ADRA2C	0.561642	0.0418487	4	Yes	1.11645	0.368357	No	No
ADRB1	0.432083	0.0328358	4	Yes	1.4057	0.268284	No	No
ADRB2	0.393734	0.0231039	7	Yes	5.76829	0.00286811	Yes	No
ADRM1	0.404956	0.183981	6	Yes	0.541705	0.80011	No	No
ADSL	0.360262	0.0737132	6	Yes	0.265346	1.42938	No	No
ADSS	0.347914	0.0257698	8	Yes	11.9631	5.60002e-06	Yes	No
AFF4	0.39362	0.0218093	4	Yes	42.0274	0	Yes	No
AFG3L2	0.444208	0.052643	6	Yes	0.959129	0.468668	No	No
AFMID	0.458175	0.113473	5	Yes	0.00123166	6.61621	No	Yes
AGA	0.329704	0.0311513	4	Yes	1.64186	0.205495	No	No
AGAP2	0.589466	0.10684	4	Yes	2.00866	0.136193	No	No
AGBL2	0.377404	0.0206751	4	Yes	1.93045	0.147732	No	No
AGBL5	0.425392	0.0764853	4	Yes	1.48107	0.246329	No	No
AGER	0.537353	0.0165606	4	Yes	1.04771	0.348392	No	No
AGGF1	0.361949	0.0286668	5	Yes	0.0322926	3.39187	No	Yes
AGK	0.425512	0.06086	5	Yes	0.0625569	2.7422	No	No
AGL	0.353748	0.0574602	4	Yes	0	0	No	No
AGMAT	0.435158	0.0846743	5	Yes	0.449415	0.99063	No	No
AGMO	0.328411	0.0308677	6	Yes	0.292384	1.33207	No	No
AGO2	0.430838	0.0574229	5	Yes	0.741436	0.636295	No	No
AGO4	0.470971	0.122383	5	Yes	11.0006	1.55001e-05	Yes	No
AGPAT1	0.521272	0.0756803	4	Yes	1.8717	0.157816	No	No
AGPAT3	0.492998	0.0585647	5	Yes	1.10467	0.394192	No	No
AGPAT4	0.478329	0.0620935	6	Yes	0.617187	0.764695	No	No
AGPAT5	0.365624	0.0300975	7	Yes	1.53561	0.237163	No	No
AGPS	0.374743	0.0585378	6	Yes	9.8747	4.87012e-05	Yes	No
AGR2	0.368772	0.035451	7	Yes	1.2786	0.312598	No	No
AGR3	0.340386	0.0525654	6	Yes	0.555589	0.807074	No	No
AGT	0.464592	0.0984309	5	Yes	0.0153223	4.07491	No	Yes
AGTPBP1	0.391579	0.0419186	4	Yes	2.38369	0.0927673	No	No
AGTR2	0.334557	0.011822	4	Yes	3.83345	0.0205296	Yes	No
AGTRAP	0.442875	0.209406	5	Yes	0.0659462	2.70309	No	No
AHCTF1	0.334828	0.042181	4	Yes	14.911	3e-07	Yes	No
AHCY	0.457594	0.0328417	5	Yes	2.58272	0.0740593	No	No
AHCYL1	0.390764	0.024935	5	Yes	36.5183	0	Yes	No
AHCYL2	0.401465	0.0340351	4	Yes	10.1435	3.67007e-05	Yes	No
AHSA1	0.496558	0.0931075	5	Yes	5.83518	0.00233202	Yes	No
AHSG	0.405821	0.0872651	4	Yes	1.00072	0.422395	No	No
AICDA	0.378449	0.0314498	5	Yes	0.043993	3.09716	No	Yes
AIDA	0.417538	0.0339479	7	Yes	3.00208	0.0490523	Yes	No
AIF1L	0.474605	0.0611242	6	Yes	0.0746071	2.59676	No	No
AIFM1	0.398929	0.0347796	5	Yes	1.0123	0.421995	No	No
AIG1	0.406538	0.0511092	5	Yes	0.534152	0.859127	No	No
AIMP1	0.334632	0.0606385	5	Yes	1.25636	0.289401	No	No
AIMP2	0.414711	0.0250958	4	Yes	1.74456	0.178208	No	No
AIP	0.491332	0.112149	6	Yes	1.80449	0.170165	No	No
AK1	0.536714	0.0936607	6	Yes	1.06861	0.4064	No	No
AK2	0.415303	0.05121	4	Yes	2.27084	0.104061	No	No
AK3	0.384764	0.0681235	5	Yes	0.0265287	3.5967	No	Yes
AK5	0.423536	0.0523066	4	Yes	0.27626	1.38155	No	No
AK6	0.382354	0.05573	6	Yes	0.528568	0.868864	No	No
AK7	0.349583	0.0612204	5	Yes	0.000102105	9.0505	No	Yes
AK8	0.48168	0.0893999	5	Yes	1.13719	0.369709	No	No
AKAP17A	0.455536	0.123322	4	Yes	0.91257	0.489002	No	No
AKAP2	0.411081	0.0316732	5	Yes	0.912336	0.501876	No	No
AKAP8	0.417675	0.0230135	4	Yes	0.00667322	4.92685	No	Yes
AKAP8L	0.519584	0.141217	5	Yes	0.906539	0.480479	No	No
AKIP1	0.390125	0.0260368	4	Yes	0.611479	0.720773	No	No
AKIRIN1	0.392391	0.020523	4	Yes	33.9824	0	Yes	No
AKIRIN2	0.385616	0.0189852	7	Yes	116.795	0	Yes	No
AKR1A1	0.455556	0.0481116	7	Yes	1.26474	0.30851	No	No
AKR1B1	0.450772	0.044661	8	Yes	1.0853	0.391969	No	No
AKR1B10	0.396075	0.0284891	5	Yes	0.163597	1.79909	No	No
AKR1C3	0.404132	0.0375002	4	Yes	0.0753383	2.49039	No	No
AKR1D1	0.384501	0.0217638	4	Yes	0.39488	1.08853	No	No
AKT1	0.52668	0.121499	4	Yes	0.287513	1.33027	No	No
AKT2	0.508861	0.0946012	5	Yes	2.64085	0.0704499	No	No
AKTIP	0.387303	0.0432986	4	Yes	5.4543	0.00391244	Yes	No
ALAS1	0.334222	0.0477116	5	Yes	2.62775	0.0650481	No	No
ALAS2	0.438198	0.0812765	4	Yes	2.48807	0.0807885	No	No
ALDH16A1	0.427435	0.0616925	5	Yes	1.74166	0.181754	No	No
ALDH1A1	0.358236	0.0389858	7	Yes	2.80736	0.0582174	No	No
ALDH1A2	0.411362	0.0613217	4	Yes	5.53976	0.00368498	Yes	No
ALDH1A3	0.420464	0.0510052	4	Yes	2.18311	0.114952	No	No
ALDH1L1	0.557902	0.0933034	5	Yes	0.054306	2.84027	No	No
ALDH3A2	0.443245	0.0809375	5	Yes	9.91049e-05	9.10984	No	Yes
ALDH3B1	0.462638	0.118594	5	Yes	0.500384	0.890376	No	No
ALDH4A1	0.513653	0.0885686	5	Yes	5.15013e-05	9.7624	No	Yes
ALDH5A1	0.423335	0.058508	4	Yes	9.15042e-05	9.22695	No	Yes
ALDH7A1	0.368599	0.0214166	4	Yes	1.11108	0.387894	No	No
ALDH9A1	0.415391	0.0441819	5	Yes	0.000124408	8.85246	No	Yes
ALDOB	0.377742	0.0491925	7	Yes	2.06755	0.128973	No	No
ALDOC	0.538789	0.084923	6	Yes	4.09134	0.0151734	Yes	No
ALG1	0.447842	0.0656554	5	Yes	6.3902e-05	9.57973	No	Yes
ALG10	0.349597	0.0432727	6	Yes	1.36514	0.285594	No	No
ALG11	0.400463	0.0464806	4	Yes	1.12149	0.375104	No	No
ALG12	0.43886	0.162488	6	Yes	0.0138232	4.19884	No	Yes
ALG13	0.277801	0.0622546	4	Yes	0.245749	1.48151	No	No
ALG14	0.325796	0.050256	4	Yes	0.240569	1.48591	No	No
ALG2	0.372633	0.0599008	6	Yes	1.19175	0.349927	No	No
ALG3	0.456727	0.0872703	5	Yes	1.18535	0.347676	No	No
ALG5	0.351897	0.024005	5	Yes	0.57813	0.780517	No	No
ALG6	0.342256	0.051288	7	Yes	0.0209873	3.81884	No	Yes
ALG8	0.371793	0.0366732	5	Yes	3.53749	0.0261209	Yes	No
ALKBH1	0.354018	0.0708404	5	Yes	0.98115	0.454654	No	No
ALKBH2	0.289064	0.137443	5	Yes	0.895355	0.501223	No	No
ALKBH3	0.443604	0.0508867	7	Yes	0.66684	0.697177	No	No
ALKBH4	0.551345	0.0568174	4	Yes	0	0	No	No
ALKBH5	0.468195	0.0352833	8	Yes	4.56699	0.0100559	Yes	No
ALKBH7	0.429965	0.0885356	4	Yes	0.853457	0.51996	No	No
ALKBH8	0.320493	0.0402717	4	Yes	0.721902	0.628815	No	No
ALLC	0.398591	0.0540023	6	Yes	1.71312	0.187148	No	No
ALOX12	0.445615	0.0650255	5	Yes	0.380458	1.11643	No	No
ALOX12B	0.461145	0.0666228	4	Yes	0.624728	0.678299	No	No
ALOX15	0.463102	0.0516338	4	Yes	0.000170415	8.43543	No	Yes
ALOX5	0.495203	0.0098136	4	Yes	0	18.4375	No	Yes
ALOX5AP	0.422033	0.0498304	6	Yes	2.07192	0.129244	No	No
ALPI	0.539709	0.0482507	4	Yes	1e-07	15.9002	No	Yes
ALPL	0.548205	0.123371	6	Yes	1.12717	0.37908	No	No
ALX1	0.3257	0.0275283	4	Yes	17.8226	0	Yes	No
ALX4	0.606843	0.07586	4	Yes	0	19.0128	No	Yes
ALYREF	0.398096	0.0406884	7	Yes	19.1345	0	Yes	No
AMACR	0.354103	0.0435282	6	Yes	2.45554	0.0853174	No	No
AMBP	0.525055	0.0899543	7	Yes	1.09609	0.37173	No	No
AMD1	0.397912	0.0222367	6	Yes	18.9613	0	Yes	No
AMDHD1	0.322676	0.0601232	5	Yes	1.18497	0.350119	No	No
AMDHD2	0.501484	0.13001	5	Yes	2.05819	0.129975	No	No
AMIGO1	0.449322	0.0714862	4	Yes	4.19142	0.014353	Yes	No
AMN	0.593139	0.10488	6	Yes	0.0102094	4.41363	No	Yes
AMN1	0.31485	0.0242319	4	Yes	0.50508	0.896543	No	No
AMPD1	0.257457	0.0898628	4	Yes	0.827219	0.51929	No	No
AMPH	0.369553	0.0231164	4	Yes	8.38208	0.000206421	Yes	No
AMT	0.514458	0.0799046	7	Yes	0.00108709	6.70995	No	Yes
AMY2B	0.164397	0.0457095	4	Yes	0.935992	0.40765	No	No
ANAPC1	0.427214	0.0177243	4	Yes	8.75038e-05	9.2549	No	Yes
ANAPC10	0.284905	0.0658206	5	Yes	3.50403	0.0288459	Yes	No
ANAPC11	0.473157	0.153828	5	Yes	0.382476	1.12436	No	No
ANAPC13	0.397068	0.0294898	4	Yes	0.963966	0.448477	No	No
ANAPC15	0.528413	0.0477736	4	Yes	0.998482	0.428605	No	No
ANAPC16	0.391935	0.0367458	5	Yes	2.65361	0.0689813	No	No
ANAPC2	0.528772	0.162314	5	Yes	0.271545	1.3685	No	No
ANAPC4	0.374808	0.0502356	6	Yes	1.63188	0.203782	No	No
ANAPC5	0.376571	0.0254113	5	Yes	1.60773	0.210111	No	No
ANAPC7	0.49493	0.076418	4	Yes	0.00576338	5.04743	No	Yes
ANGEL1	0.506669	0.0489404	4	Yes	1.9616	0.143391	No	No
ANGEL2	0.349	0.0441703	4	Yes	0.177009	1.78561	No	No
ANGPT1	0.379459	0.0906837	6	Yes	5.15819	0.00541403	Yes	No
ANGPT2	0.425095	0.0689902	5	Yes	0.594747	0.774977	No	No
ANGPT4	0.45747	0.131405	4	Yes	0.251282	1.44314	No	No
ANGPTL1	0.316776	0.0479891	7	Yes	5.89185	0.00254343	Yes	No
ANGPTL2	0.458913	0.0801102	7	Yes	0.664689	0.700355	No	No
ANGPTL3	0.327835	0.0518532	7	Yes	1.04807	0.417904	No	No
ANGPTL4	0.509968	0.0932578	4	Yes	2.15573	0.114742	No	No
ANGPTL7	0.3988	0.0627028	5	Yes	1.43626	0.259469	No	No
ANKFY1	0.40915	0.0463539	4	Yes	2.50426	0.0827043	No	No
ANKH	0.446174	0.0492222	5	Yes	0.873257	0.528976	No	No
ANKHD1	0.337587	0.019832	6	Yes	25.3921	0	Yes	No
ANKIB1	0.349417	0.0207857	4	Yes	120.281	0	Yes	No
ANKMY2	0.394018	0.0425369	6	Yes	1.70217	0.189521	No	No
ANKRA2	0.327578	0.0460419	6	Yes	9.23401	8.43036e-05	Yes	No
ANKRD1	0.404108	0.0434963	6	Yes	1.96618	0.144902	No	No
ANKRD10	0.374356	0.0657588	5	Yes	0.428637	1.01994	No	No
ANKRD12	0.3994	0.0391576	4	Yes	0.847216	0.547601	No	No
ANKRD13A	0.482355	0.0328601	4	Yes	10.5211	2.18002e-05	Yes	No
ANKRD13C	0.369925	0.0339751	6	Yes	2.19657	0.11448	No	No
ANKRD22	0.387516	0.0394499	6	Yes	0.937086	0.486274	No	No
ANKRD29	0.380637	0.0375075	4	Yes	0.374934	1.13562	No	No
ANKRD34B	0.32643	0.0475811	5	Yes	0.101881	2.26605	No	No
ANKRD34C	0.389582	0.00948332	4	Yes	0.0333244	3.34934	No	Yes
ANKRD37	0.371221	0.0335846	6	Yes	1.30488	0.294825	No	No
ANKRD40	0.458284	0.0282561	5	Yes	14.5837	4e-07	Yes	No
ANKRD46	0.386747	0.0529233	5	Yes	0.462581	0.972967	No	No
ANKRD49	0.360803	0.0340483	6	Yes	4.7339	0.0081355	Yes	No
ANKRD52	0.489417	0.0857186	6	Yes	17.8104	0	Yes	No
ANKRD54	0.492439	0.0998387	4	Yes	0.123871	2.09549	No	No
ANKRD55	0.313784	0.0454998	4	Yes	2.14472	0.112862	No	No
ANKRD9	0.458945	0.0872579	5	Yes	0.500176	0.900234	No	No
ANKS4B	0.423538	0.0463895	6	Yes	0.683583	0.683614	No	No
ANO1	0.434425	0.0536829	5	Yes	3.5663	0.0271861	Yes	No
ANP32A	0.431179	0.052487	8	Yes	12.7496	2.6e-06	Yes	No
ANP32B	0.422554	0.0437034	8	Yes	5.39045	0.00427613	Yes	No
ANP32E	0.362911	0.0317251	5	Yes	9.90618	4.63011e-05	Yes	No
ANPEP	0.585774	0.0912553	6	Yes	1.39849	0.258998	No	No
ANXA1	0.297	0.0231411	6	Yes	1.45259	0.237959	No	No
ANXA10	0.304971	0.0107757	4	Yes	0.309369	1.23974	No	No
ANXA11	0.426083	0.0730044	4	Yes	0.529714	0.849538	No	No
ANXA13	0.426699	0.0595473	7	Yes	0.0242853	3.6757	No	Yes
ANXA2	0.492887	0.0344757	5	Yes	0.984398	0.430144	No	No
ANXA3	0.371459	0.0529759	4	Yes	0.47319	0.93175	No	No
ANXA4	0.340579	0.038005	7	Yes	1.90253	0.153363	No	No
ANXA5	0.425505	0.0602548	7	Yes	0.691758	0.668161	No	No
ANXA6	0.538191	0.0704112	4	Yes	1.17515	0.345122	No	No
ANXA7	0.346189	0.0426447	4	Yes	1.91897	0.14342	No	No
AOX1	0.380425	0.043712	5	Yes	0.900885	0.490606	No	No
AP1AR	0.355738	0.0549853	4	Yes	0.651001	0.713117	No	No
AP1G1	0.456569	0.00686685	4	Yes	33.0818	0	Yes	No
AP1M1	0.526999	0.100433	6	Yes	0.0319996	3.4	No	Yes
AP1S1	0.549188	0.021762	5	Yes	5.79233	0.00267036	Yes	No
AP1S2	0.360604	0.0275376	6	Yes	2.21294	0.111391	No	No
AP1S3	0.361187	0.0250095	5	Yes	0.0125222	4.32696	No	Yes
AP2A2	0.495446	0.0713533	5	Yes	1.82102	0.170156	No	No
AP2B1	0.432849	0.0601028	4	Yes	2.77286	0.0617845	No	No
AP2M1	0.54466	0.0639482	6	Yes	14.5813	4e-07	Yes	No
AP2S1	0.573537	0.158217	6	Yes	2.28994	0.10257	No	No
AP3B1	0.412151	0.0195531	4	Yes	24.8268	0	Yes	No
AP3D1	0.581041	0.0771391	4	Yes	0.0356009	3.27541	No	Yes
AP3M1	0.394567	0.0235351	6	Yes	3.33161	0.0348915	Yes	No
AP3M2	0.430734	0.0667851	5	Yes	2.33278	0.0961039	No	No
AP3S2	0.480929	0.106411	7	Yes	0.00618378	5.0505	No	Yes
AP4M1	0.440806	0.0795052	5	Yes	1.02272	0.415059	No	No
AP5B1	0.463811	0.107037	4	Yes	0.0900339	2.41818	No	No
AP5M1	0.339446	0.0477659	7	Yes	0.244516	1.49297	No	No
AP5S1	0.464219	0.0860152	5	Yes	0.024473	3.63272	No	Yes
AP5Z1	0.554444	0.0515135	4	Yes	0	0	No	No
APBA3	0.508028	0.0578739	4	Yes	0.00969252	4.3128	No	Yes
APBB1IP	0.393064	0.0784333	6	Yes	0.638446	0.722009	No	No
APBB3	0.464822	0.0584438	5	Yes	2.88788	0.0528644	No	No
APC2	0.623077	0.0458907	4	Yes	0	0	No	No
APCDD1	0.423994	0.064932	4	Yes	2.65407	0.0703556	No	No
APCS	0.367907	0.0155436	4	Yes	0.951445	0.446678	No	No
APEH	0.556652	0.0521062	6	Yes	0.733744	0.576699	No	No
APEX1	0.391396	0.0323552	6	Yes	0.188383	1.70937	No	No
APEX2	0.410417	0.0999495	6	Yes	0.167952	1.79172	No	No
APH1A	0.519672	0.0208472	4	Yes	28.8367	0	Yes	No
API5	0.350005	0.0196556	5	Yes	21.0549	0	Yes	No
APIP	0.326843	0.0667903	6	Yes	1.31765	0.29676	No	No
APITD1	0.41435	0.0977856	7	Yes	1.25791	0.324334	No	No
APLF	0.350224	0.0596509	5	Yes	1.17101	0.358736	No	No
APLNR	0.48028	0.0750814	4	Yes	0.0456959	3.05527	No	Yes
APMAP	0.464876	0.054023	7	Yes	0.305154	1.29441	No	No
APOA1	0.506439	0.0741713	5	Yes	1.08143	0.377459	No	No
APOA2	0.514538	0.0703679	5	Yes	0.211103	1.54054	No	No
APOA4	0.530766	0.0729987	6	Yes	2.3722	0.0880779	No	No
APOB	0.359422	0.0539075	4	Yes	1.19881	0.326125	No	No
APOC2	0.470904	0.0334433	4	Yes	0.350898	1.15467	No	No
APOC3	0.591849	0.0308738	4	Yes	2.2194	0.0943095	No	No
APOC4	0.452884	0.0896689	5	Yes	0.559113	0.77459	No	No
APOD	0.53459	0.0470262	4	Yes	0.885949	0.481551	No	No
APOF	0.398553	0.018978	4	Yes	0	0	No	No
APOH	0.369349	0.0267493	6	Yes	0.176812	1.71069	No	No
APOLD1	0.403268	0.0443763	4	Yes	0.00192375	6.18656	No	Yes
APOM	0.459774	0.101849	4	Yes	1.01192	0.394564	No	No
APOOL	0.325696	0.0319177	6	Yes	2.40229	0.0925858	No	No
APP	0.453036	0.124405	4	Yes	27.2911	0	Yes	No
APPBP2	0.375737	0.0187514	5	Yes	3.59449	0.0268124	Yes	No
APPL1	0.365816	0.0341555	4	Yes	0.232189	1.55188	No	No
APPL2	0.396661	0.0209154	4	Yes	7.93181	0.000310548	Yes	No
APTX	0.427162	0.050392	7	Yes	1.62671	0.207902	No	No
AQP1	0.578402	0.0844869	4	Yes	0.720773	0.628734	No	No
AQP11	0.378589	0.0453256	6	Yes	1.66445	0.202537	No	No
AQP2	0.588686	0.0964728	8	Yes	0.0109339	4.47252	No	Yes
AQP3	0.467925	0.0367705	5	Yes	0.0960748	2.33764	No	No
AQP5	0.580462	0.0161396	4	Yes	0.0486033	2.86891	No	No
AQP7	0.460096	0.0291168	5	Yes	0.453718	0.977821	No	No
AQP8	0.508981	0.0358209	4	Yes	0.0937819	2.34029	No	No
AQR	0.347825	0.0572124	4	Yes	1.77567	0.169242	No	No
AR	0.456387	0.0525599	5	Yes	3.2687	0.037633	Yes	No
ARCN1	0.416259	0.046539	6	Yes	6.91336	0.000910214	Yes	No
AREL1	0.480433	0.0740201	6	Yes	4.23745	0.013678	Yes	No
ARF1	0.48176	0.10474	7	Yes	8.45879	0.00020102	Yes	No
ARF4	0.344598	0.0103699	5	Yes	27.4529	0	Yes	No
ARF5	0.529207	0.0796522	6	Yes	8.20321	0.000249731	Yes	No
ARF6	0.369155	0.0283125	5	Yes	33.373	0	Yes	No
ARFGAP1	0.565707	0.095609	4	Yes	0.184415	1.74304	No	No
ARFGAP2	0.518967	0.0711624	4	Yes	1.54282	0.228786	No	No
ARFGAP3	0.421197	0.0528417	7	Yes	0.965832	0.46202	No	No
ARFGEF1	0.376301	0.0161326	5	Yes	116.959	0	Yes	No
ARFGEF2	0.44103	0.0535255	4	Yes	8.20526	0.000239029	Yes	No
ARFIP1	0.340721	0.0091701	6	Yes	31.12	0	Yes	No
ARG2	0.371895	0.0329823	8	Yes	5.30283	0.00463131	Yes	No
ARGLU1	0.341963	0.0220659	7	Yes	33.8257	0	Yes	No
ARHGAP1	0.55728	0.0521596	5	Yes	0.0195049	3.88606	No	Yes
ARHGAP10	0.546122	0.0976657	5	Yes	0.0997073	2.29458	No	No
ARHGAP15	0.316982	0.0179398	5	Yes	10.7222	1.83002e-05	Yes	No
ARHGAP18	0.337898	0.0344106	5	Yes	1.09914	0.389045	No	No
ARHGAP20	0.402017	0.0168911	4	Yes	1.03556	0.425078	No	No
ARHGAP21	0.34335	0.0218174	5	Yes	95.5048	0	Yes	No
ARHGAP25	0.444895	0.0417801	5	Yes	0.0574073	2.82597	No	No
ARHGAP26	0.476998	0.0669238	5	Yes	0.306674	1.31174	No	No
ARHGAP28	0.423052	0.0549017	4	Yes	0.000216423	8.36572	No	Yes
ARHGAP29	0.323342	0.0513092	5	Yes	4.15563	0.0145866	Yes	No
ARHGAP31	0.470166	0.0380073	4	Yes	0	0	No	No
ARHGAP35	0.565968	0.0614584	5	Yes	0	0	No	No
ARHGDIA	0.530789	0.0908411	6	Yes	6.08204	0.00215823	Yes	No
ARHGDIB	0.48857	0.0606426	4	Yes	0.881262	0.505177	No	No
ARHGDIG	0.565822	0.140224	4	Yes	0.347672	1.12723	No	No
ARHGEF16	0.586096	0.0621434	4	Yes	8e-07	13.7173	No	Yes
ARHGEF19	0.56899	0.047766	4	Yes	0	0	No	No
ARHGEF39	0.455885	0.0337549	6	Yes	0.0339949	3.34024	No	Yes
ARID3A	0.422335	0.022494	4	Yes	2.80656	0.0568277	No	No
ARID3B	0.51424	0.0801799	4	Yes	6.82827	0.000997097	Yes	No
ARID4A	0.345452	0.0204306	5	Yes	61.5608	0	Yes	No
ARID5B	0.432915	0.0500308	4	Yes	3.64905	0.0242047	Yes	No
ARIH1	0.397076	0.0364453	6	Yes	37.8743	0	Yes	No
ARIH2	0.463004	0.0492183	6	Yes	5.52936	0.0037432	Yes	No
ARL1	0.391195	0.043729	6	Yes	2.56594	0.0746517	No	No
ARL10	0.511184	0.0767303	5	Yes	0.632296	0.733621	No	No
ARL11	0.455816	0.0441443	6	Yes	0.0433049	3.11619	No	Yes
ARL13A	0.396194	0.0569364	4	Yes	0.890463	0.497013	No	No
ARL13B	0.353562	0.0135017	4	Yes	5.97402	0.0023676	Yes	No
ARL14	0.336754	0.0207273	4	Yes	2.74887	0.0621813	No	No
ARL14EP	0.364771	0.0363019	7	Yes	2.28397	0.102616	No	No
ARL15	0.364249	0.035729	5	Yes	6.96893	0.000867876	Yes	No
ARL2	0.531316	0.119954	5	Yes	1.57204	0.213951	No	No
ARL2BP	0.411646	0.0480121	7	Yes	1.05426	0.417213	No	No
ARL3	0.448922	0.0761813	5	Yes	2.02369	0.136849	No	No
ARL4A	0.404449	0.0103935	4	Yes	4.42569	0.0111712	Yes	No
ARL4D	0.468886	0.0369813	6	Yes	1.34925	0.283942	No	No
ARL5A	0.391991	0.0600853	4	Yes	1.75042	0.185363	No	No
ARL5B	0.34518	0.0402206	5	Yes	8.84653	0.000133309	Yes	No
ARL6	0.312561	0.0265749	6	Yes	3.83299	0.0208041	Yes	No
ARL6IP1	0.395506	0.0339428	4	Yes	0.912774	0.497777	No	No
ARL6IP4	0.443166	0.0920607	4	Yes	2.16683	0.113409	No	No
ARL6IP5	0.384772	0.0456374	6	Yes	1.53582	0.236022	No	No
ARL6IP6	0.306196	0.0381267	6	Yes	4.85594	0.00727993	Yes	No
ARL8A	0.452499	0.0753368	5	Yes	4.61754	0.00935603	Yes	No
ARL8B	0.394705	0.0201531	5	Yes	20.5075	0	Yes	No
ARL9	0.486149	0.130152	4	Yes	1.22139	0.328932	No	No
ARMC1	0.365911	0.0273845	7	Yes	18.701	0	Yes	No
ARMC6	0.512885	0.0966137	4	Yes	0.00655584	4.91099	No	Yes
ARMC7	0.476163	0.0863629	6	Yes	0.000181817	8.52078	No	Yes
ARMC8	0.397275	0.0383636	6	Yes	17.1605	0	Yes	No
ARMCX1	0.316403	0.0185636	4	Yes	2.56596	0.0616236	No	No
ARMCX3	0.361999	0.0111243	4	Yes	12.1349	4.20001e-06	Yes	No
ARMT1	0.374412	0.0358151	5	Yes	0.000285541	8.03135	No	Yes
ARNT2	0.486626	0.0425327	6	Yes	0	0	No	No
ARNTL2	0.366767	0.0388226	5	Yes	5.31362	0.00455616	Yes	No
ARPC1A	0.412046	0.0651516	6	Yes	6.29725	0.00159547	Yes	No
ARPC1B	0.420549	0.0837851	7	Yes	0.362629	1.13358	No	No
ARPC2	0.411102	0.0178323	6	Yes	16.492	1e-07	Yes	No
ARPC3	0.382898	0.0540452	7	Yes	0.883267	0.497652	No	No
ARPC4	0.515259	0.101629	5	Yes	6.04625	0.0021466	Yes	No
ARPC5	0.402222	0.019411	5	Yes	20.7414	0	Yes	No
ARPC5L	0.449869	0.025426	4	Yes	23.6721	0	Yes	No
ARPIN	0.435294	0.0884532	6	Yes	0.0494673	2.98008	No	No
ARR3	0.529307	0.099472	5	Yes	0.439766	0.947409	No	No
ARRDC2	0.451557	0.0725451	4	Yes	1.59268	0.217282	No	No
ARRDC3	0.392233	0.0144306	4	Yes	15.1281	2e-07	Yes	No
ARRDC5	0.347359	0.111401	4	Yes	0.493805	0.860622	No	No
ARSK	0.252597	0.14584	4	Yes	0.00392098	5.45124	No	Yes
ART1	0.541583	0.0515622	5	Yes	0.833892	0.54754	No	No
ART4	0.370787	0.114955	5	Yes	0.105007	2.26462	No	No
AS3MT	0.398436	0.0519718	5	Yes	0.392171	1.09013	No	No
ASAH1	0.391235	0.0378204	4	Yes	0.983969	0.44282	No	No
ASAH2	0.365977	0.00747829	4	Yes	1.08385	0.401332	No	No
ASB1	0.536988	0.0528776	4	Yes	0.0122662	4.33255	No	Yes
ASB12	0.435567	0.0464516	5	Yes	1.89896	0.15077	No	No
ASB16	0.506495	0.0684453	4	Yes	0.00677107	4.90635	No	Yes
ASB17	0.351575	0.0431871	4	Yes	0.568737	0.635655	No	No
ASB3	0.346839	0.0166265	7	Yes	1.06936	0.407714	No	No
ASB5	0.298954	0.0256921	4	Yes	0.0947867	2.32064	No	No
ASB6	0.498058	0.0914343	6	Yes	0.219875	1.58502	No	No
ASB7	0.36318	0.0173791	5	Yes	7.58275	0.000463007	Yes	No
ASB8	0.441369	0.0746601	5	Yes	0.825828	0.555378	No	No
ASB9	0.399101	0.0465832	5	Yes	2.07996	0.12427	No	No
ASCC2	0.494189	0.110664	5	Yes	1.49585	0.234981	No	No
ASCC3	0.358173	0.0196351	4	Yes	4.36529	0.0109826	Yes	No
ASF1A	0.312226	0.0180596	6	Yes	2.39189	0.0907326	No	No
ASF1B	0.483166	0.0400163	5	Yes	0.214034	1.59695	No	No
ASH1L	0.400745	0.0105586	4	Yes	197.934	0	Yes	No
ASH2L	0.445866	0.0441695	4	Yes	0.920388	0.481573	No	No
ASIP	0.604382	0.0346592	4	Yes	0	0	No	No
ASL	0.505445	0.204148	5	Yes	1.17347	0.33557	No	No
ASMT	0.396244	0.0907439	4	Yes	0.759724	0.597885	No	No
ASMTL	0.449595	0.146478	4	Yes	1.75433	0.171907	No	No
ASNA1	0.54218	0.101435	5	Yes	1.38009	0.279912	No	No
ASNS	0.385349	0.0656847	6	Yes	1.91807	0.15473	No	No
ASNSD1	0.254598	0.0706089	6	Yes	0.749581	0.583215	No	No
ASPA	0.335281	0.0318281	6	Yes	0.108961	2.20461	No	No
ASPG	0.511024	0.11694	6	Yes	0.785875	0.590524	No	No
ASPH	0.403117	0.0435442	4	Yes	0.878373	0.521391	No	No
ASPHD2	0.47377	0.0701449	4	Yes	1.61753	0.210921	No	No
ASPM	0.282629	0.0270488	5	Yes	1.16401	0.343196	No	No
ASRGL1	0.432345	0.0710653	5	Yes	0.258183	1.44087	No	No
ASS1	0.493837	0.059287	6	Yes	1.27104	0.319645	No	No
ASUN	0.308771	0.0688812	6	Yes	3.30515	0.032464	Yes	No
ASZ1	0.275636	0.0289389	6	Yes	3.61914	0.0242159	Yes	No
ATAD1	0.371366	0.0512373	5	Yes	2.16092	0.117064	No	No
ATAD2	0.330333	0.0334946	4	Yes	0.141021	1.9463	No	No
ATAD3A	0.549576	0.028442	4	Yes	0.0663703	2.6524	No	No
ATCAY	0.514931	0.0308181	4	Yes	0	0	No	No
ATF1	0.317946	0.0374775	7	Yes	8.13475	0.000265735	Yes	No
ATF3	0.480275	0.0663281	5	Yes	5.62718	0.00333556	Yes	No
ATF4	0.362484	0.0397943	5	Yes	7.46874	0.000372169	Yes	No
ATF7IP	0.377663	0.0154354	4	Yes	3.14329	0.0417884	Yes	No
ATG101	0.457568	0.120726	5	Yes	1.14629	0.354571	No	No
ATG13	0.502368	0.0896839	5	Yes	0.0668923	2.69567	No	No
ATG14	0.446456	0.0360181	4	Yes	0	0	No	No
ATG16L1	0.49293	0.052622	4	Yes	1e-07	15.758	No	Yes
ATG2A	0.572772	0.0920948	5	Yes	3.93491	0.017178	Yes	No
ATG2B	0.408292	0.0326361	4	Yes	0.0678217	2.69545	No	No
ATG3	0.309461	0.0392622	7	Yes	4.14522	0.0146766	Yes	No
ATG4A	0.389	0.00726325	5	Yes	4.64287	0.00892572	Yes	No
ATG4B	0.452122	0.0613417	4	Yes	3.42777	0.0311554	Yes	No
ATG4C	0.33028	0.0563754	4	Yes	0.953211	0.464179	No	No
ATG4D	0.532555	0.0483559	4	Yes	1.44854	0.254677	No	No
ATG7	0.499839	0.112029	4	Yes	1.14154	0.364951	No	No
ATG9A	0.545929	0.0962408	5	Yes	4.48723	0.0106053	Yes	No
ATIC	0.413667	0.0647483	7	Yes	0.14202	1.96694	No	No
ATL1	0.348068	0.0668991	6	Yes	8.39791	0.000197419	Yes	No
ATM	0.371642	0.0428922	6	Yes	3.29005e-05	10.2331	No	Yes
ATOH8	0.510894	0.0775313	6	Yes	0.744339	0.632575	No	No
ATP10D	0.372668	0.0198868	5	Yes	1.16903	0.361033	No	No
ATP13A1	0.55894	0.0727941	6	Yes	3.14214	0.0395511	Yes	No
ATP13A4	0.390224	0.0811169	4	Yes	0.988197	0.453924	No	No
ATP1A1	0.527454	0.0718181	7	Yes	17.0392	0	Yes	No
ATP1A2	0.480089	0.0309244	6	Yes	0.0165689	4.05668	No	Yes
ATP1A3	0.577593	0.025047	4	Yes	1.79715	0.162502	No	No
ATP1B1	0.349364	0.0333727	7	Yes	146.978	0	Yes	No
ATP1B2	0.517711	0.0577233	4	Yes	2.39746	0.0896362	No	No
ATP1B3	0.38789	0.0262931	6	Yes	18.1243	0	Yes	No
ATP2B1	0.371749	0.0353748	6	Yes	102.409	0	Yes	No
ATP2B4	0.453466	0.0467967	4	Yes	1.15532	0.350869	No	No
ATP4B	0.510654	0.098114	6	Yes	0	0	No	No
ATP5A1	0.366014	0.0340207	7	Yes	1.05453	0.403357	No	No
ATP5B	0.424157	0.0682277	8	Yes	1.49326	0.2334	No	No
ATP5D	0.629688	0.0443005	4	Yes	4e-07	14.2477	No	Yes
ATP5F1	0.35056	0.0317599	5	Yes	1.55818	0.223615	No	No
ATP5G1	0.488121	0.0757244	5	Yes	2.35263	0.0880247	No	No
ATP5G3	0.316	0.0225383	4	Yes	7.26392	0.000557455	Yes	No
ATP5H	0.402362	0.0683073	6	Yes	0.855059	0.500978	No	No
ATP5I	0.410782	0.0714581	4	Yes	0.498932	0.832318	No	No
ATP5J	0.349488	0.0828156	5	Yes	1.86692	0.157989	No	No
ATP5J2	0.431962	0.088712	6	Yes	1.05373	0.403327	No	No
ATP5L	0.346752	0.0246124	7	Yes	1.64794	0.201572	No	No
ATP5O	0.410675	0.0556204	7	Yes	0.792115	0.542021	No	No
ATP5S	0.366504	0.0555385	6	Yes	1.37875	0.278266	No	No
ATP6AP1	0.45895	0.0853139	5	Yes	1.41472	0.258906	No	No
ATP6AP2	0.329774	0.0175183	8	Yes	5.5838	0.0034675	Yes	No
ATP6V0A1	0.587611	0.0652337	4	Yes	0.700201	0.662147	No	No
ATP6V0A2	0.38682	0.0574047	4	Yes	0.00555802	5.13885	No	Yes
ATP6V0A4	0.434322	0.0450553	5	Yes	0.217757	1.57006	No	No
ATP6V0B	0.49977	0.0969728	7	Yes	4.91965	0.00677681	Yes	No
ATP6V0C	0.451435	0.0725708	4	Yes	12.435	3.20001e-06	Yes	No
ATP6V0D1	0.502585	0.0976404	7	Yes	1.7794	0.179627	No	No
ATP6V0D2	0.368824	0.0325595	6	Yes	0.000508429	7.48298	No	Yes
ATP6V1A	0.373532	0.0149176	4	Yes	5.15111	0.00515577	Yes	No
ATP6V1B1	0.439657	0.102072	5	Yes	3.12005e-05	10.2196	No	Yes
ATP6V1B2	0.427859	0.0479815	7	Yes	6.45123	0.00146337	Yes	No
ATP6V1C1	0.393196	0.0115586	6	Yes	3.882	0.0198956	Yes	No
ATP6V1D	0.404965	0.0215297	7	Yes	2.12463	0.121187	No	No
ATP6V1E1	0.4791	0.0484739	4	Yes	0.0964249	2.28044	No	No
ATP6V1E2	0.41828	0.049345	5	Yes	0.0982397	2.1204	No	No
ATP6V1F	0.448794	0.0954655	5	Yes	2.42714	0.0852372	No	No
ATP6V1G1	0.370063	0.0252379	8	Yes	3.3368	0.0339868	Yes	No
ATP6V1G2	0.436528	0.0577516	5	Yes	0.03994	3.16323	No	Yes
ATP6V1H	0.368791	0.0246413	4	Yes	2.11238	0.121291	No	No
ATP8B1	0.381379	0.0273521	5	Yes	0.0412551	3.15643	No	Yes
ATPAF2	0.466966	0.0736812	7	Yes	0.0794141	2.50823	No	No
ATPIF1	0.394526	0.0499718	5	Yes	0.652191	0.653903	No	No
ATRAID	0.445838	0.0608577	5	Yes	1.81254	0.167598	No	No
ATRIP	0.462995	0.127145	6	Yes	1.40293	0.26875	No	No
ATXN10	0.424016	0.0547563	6	Yes	0.388231	1.10173	No	No
ATXN1L	0.48122	0.0173073	4	Yes	60.3007	0	Yes	No
ATXN2L	0.515072	0.0850061	5	Yes	5.44807	0.00391094	Yes	No
ATXN3	0.386256	0.100607	5	Yes	2.55011	0.0777751	No	No
ATXN7L3B	0.442933	0.0163464	4	Yes	15.4161	2e-07	Yes	No
AUH	0.364503	0.0532029	5	Yes	4.72012	0.00811494	Yes	No
AURKA	0.480563	0.0968532	4	Yes	0.514583	0.882906	No	No
AURKAIP1	0.426135	0.13594	7	Yes	0.592117	0.76401	No	No
AURKB	0.407313	0.0283792	5	Yes	0.0845677	2.45196	No	No
AVEN	0.41745	0.0427978	4	Yes	1.42671	0.26222	No	No
AVIL	0.398825	0.0778321	5	Yes	0.078567	2.49236	No	No
AVL9	0.411208	0.0628197	4	Yes	0.365248	1.16341	No	No
AVP	0.606022	0.191882	7	Yes	0.147368	1.81242	No	No
AVPI1	0.51658	0.0412612	5	Yes	2.41003e-05	10.2428	No	Yes
AVPR1A	0.40722	0.0774958	4	Yes	0.172557	1.79514	No	No
AWAT1	0.435816	0.0632242	4	Yes	0.1783	1.71948	No	No
AXIN2	0.44432	0.0760739	5	Yes	3.38981	0.0321824	Yes	No
AZGP1	0.478109	0.0392695	6	Yes	0	16.702	No	Yes
AZIN1	0.34206	0.0143249	5	Yes	61.0241	0	Yes	No
AZIN2	0.54373	0.102166	6	Yes	5.41287	0.00373928	Yes	No
B3GALNT1	0.350278	0.019876	4	Yes	0.000744477	6.98667	No	Yes
B3GALNT2	0.391012	0.0444975	4	Yes	0.919672	0.493793	No	No
B3GALT1	0.373758	0.0200627	4	Yes	0.572067	0.796198	No	No
B3GALT2	0.313736	0.0316779	7	Yes	2.84625	0.0574541	No	No
B3GALT4	0.560559	0.0295083	5	Yes	3e-07	14.3458	No	Yes
B3GALT6	0.534779	0.0862305	5	Yes	0	16.6993	No	Yes
B3GAT2	0.399842	0.0443344	6	Yes	3.54595	0.0280162	Yes	No
B3GAT3	0.498498	0.110754	5	Yes	5.47425	0.00369793	Yes	No
B3GNT2	0.367751	0.0310064	5	Yes	2.62603	0.072445	No	No
B3GNT3	0.455453	0.0814175	6	Yes	0.00193016	6.17	No	Yes
B3GNT5	0.345358	0.0198029	4	Yes	6.13921	0.00201984	Yes	No
B3GNT6	0.51948	0.0401378	4	Yes	0	0	No	No
B3GNT7	0.481252	0.10774	5	Yes	1.31155	0.304184	No	No
B4GALT1	0.452234	0.0489374	7	Yes	2.03617	0.135155	No	No
B4GALT3	0.512055	0.0212062	5	Yes	6.49984	0.00132287	Yes	No
B4GALT4	0.416204	0.0290366	4	Yes	1.90376	0.15086	No	No
B4GALT5	0.434922	0.0707459	5	Yes	0.606291	0.77324	No	No
B4GALT6	0.366769	0.0363142	7	Yes	0.922618	0.497326	No	No
B4GALT7	0.507671	0.083379	7	Yes	0.000120707	8.87905	No	Yes
B4GAT1	0.446798	0.0288287	5	Yes	4.89452	0.00670865	Yes	No
B9D1	0.441086	0.0842087	5	Yes	1.49077	0.241239	No	No
B9D2	0.520059	0.0809682	6	Yes	0.00399939	5.34142	No	Yes
BAALC	0.44997	0.0290949	4	Yes	1e-07	16.5553	No	Yes
BABAM1	0.444007	0.0794811	6	Yes	0.0539244	2.85205	No	No
BACE1	0.463573	0.058217	6	Yes	6.33276	0.00168923	Yes	No
BAD	0.662561	0.115293	4	Yes	0.000394778	7.48639	No	Yes
BAG2	0.372417	0.0670806	6	Yes	0.000322152	7.91314	No	Yes
BAG3	0.4011	0.045187	7	Yes	1.03092	0.422972	No	No
BAG4	0.372308	0.0224712	4	Yes	1.74959	0.184839	No	No
BAIAP2L1	0.436512	0.0410667	5	Yes	0.0661786	2.69876	No	No
BAK1	0.611651	0.052682	4	Yes	0.0521762	2.85515	No	No
BAMBI	0.378742	0.0555549	6	Yes	1.56178	0.229094	No	No
BANF1	0.466571	0.0770402	4	Yes	3.27381	0.0350009	Yes	No
BANP	0.432985	0.077215	4	Yes	2.48522	0.0810261	No	No
BAP1	0.517927	0.0983158	8	Yes	2.15792	0.117163	No	No
BARD1	0.404145	0.0333618	4	Yes	0.555345	0.829103	No	No
BARHL2	0.490877	0.0904925	4	Yes	0.628551	0.728353	No	No
BARX1	0.573283	0.0966889	5	Yes	1.15257	0.356185	No	No
BARX2	0.467279	0.0285496	5	Yes	1.14457	0.359585	No	No
BASP1	0.387009	0.059075	6	Yes	21.1016	0	Yes	No
BATF	0.614322	0.115712	6	Yes	0.0263483	3.52097	No	Yes
BATF3	0.490906	0.131671	4	Yes	0.0341689	3.28037	No	Yes
BAX	0.473182	0.0560032	4	Yes	1.26742	0.317339	No	No
BAZ2B	0.315722	0.0634483	4	Yes	4.77606	0.00756494	Yes	No
BBOX1	0.350047	0.0365969	5	Yes	2.71905	0.0641867	No	No
BBS1	0.452846	0.0658702	5	Yes	0.0385422	3.23975	No	Yes
BBS10	0.368609	0.0583874	4	Yes	0.0297495	3.45678	No	Yes
BBS2	0.384575	0.0328598	6	Yes	0.128449	2.03213	No	No
BBS4	0.420032	0.0505926	6	Yes	1.39275	0.276746	No	No
BBS5	0.329606	0.115829	7	Yes	0.592789	0.785443	No	No
BCAM	0.558852	0.116034	4	Yes	6.56801	0.00117169	Yes	No
BCAP29	0.328166	0.031236	6	Yes	3.47778	0.0297021	Yes	No
BCAP31	0.488396	0.0905528	4	Yes	0.78832	0.573152	No	No
BCAR1	0.45504	0.112874	4	Yes	1.45262	0.257962	No	No
BCAR3	0.331245	0.0279051	4	Yes	5.93177	0.00219982	Yes	No
BCAS2	0.399389	0.0844265	7	Yes	0.147725	1.92984	No	No
BCCIP	0.359302	0.0507938	6	Yes	6.12711	0.00183418	Yes	No
BCDIN3D	0.459673	0.045487	4	Yes	0.0007745	7.01763	No	Yes
BCHE	0.285617	0.0450549	4	Yes	1.4421	0.260932	No	No
BCKDHA	0.498004	0.120632	5	Yes	0.273276	1.37089	No	No
BCKDK	0.533728	0.0901242	5	Yes	3.08548	0.043877	Yes	No
BCL10	0.330972	0.0637893	6	Yes	0.360321	1.16725	No	No
BCL2	0.394564	0.0391966	4	Yes	1.79737	0.171846	No	No
BCL2L13	0.488548	0.0907987	4	Yes	0.0787656	2.55069	No	No
BCL2L14	0.460741	0.0204935	4	Yes	0.944007	0.468415	No	No
BCL2L2	0.489059	0.04573	5	Yes	26.2693	0	Yes	No
BCL3	0.544055	0.0171463	4	Yes	6.01781	0.00175113	Yes	No
BCL6	0.413919	0.0500439	6	Yes	25.1717	0	Yes	No
BCL7B	0.453991	0.0803585	5	Yes	3.62184	0.0250197	Yes	No
BCL7C	0.512753	0.0505264	5	Yes	1.23675	0.327788	No	No
BCL9	0.487066	0.0870621	4	Yes	14.0576	7e-07	Yes	No
BCL9L	0.511468	0.0993211	5	Yes	0.747312	0.623845	No	No
BCO2	0.419771	0.0487021	4	Yes	0.0573453	2.80262	No	No
BCOR	0.334995	0.0277694	4	Yes	27.7849	0	Yes	No
BCS1L	0.460543	0.0686323	6	Yes	1.77094	0.173239	No	No
BDH1	0.410219	0.0574394	4	Yes	0.964998	0.461539	No	No
BDH2	0.368622	0.0685941	4	Yes	1.0596	0.411354	No	No
BDNF	0.260951	0.0303815	4	Yes	14.7335	3e-07	Yes	No
BECN1	0.328879	0.0465334	6	Yes	4.69198	0.00828835	Yes	No
BEND3	0.481639	0.107344	4	Yes	1.27848	0.317591	No	No
BEND5	0.411241	0.0646656	5	Yes	2.32601	0.0955812	No	No
BEST1	0.42526	0.0794363	5	Yes	0.355614	1.1679	No	No
BET1	0.352349	0.0111267	7	Yes	3.45524	0.0301234	Yes	No
BET1L	0.49526	0.0893811	6	Yes	0.403802	1.0804	No	No
BFAR	0.427679	0.0762865	4	Yes	0.00457505	5.29375	No	Yes
BFSP2	0.439967	0.0840849	6	Yes	1.85508	0.154288	No	No
BGLAP	0.555922	0.0525426	6	Yes	0.414904	1.04651	No	No
BGN	0.557123	0.106456	6	Yes	0.000933736	6.8674	No	Yes
BHLHA15	0.557604	0.126199	4	Yes	0.0096275	4.59031	No	Yes
BHLHE22	0.368067	0.0120432	5	Yes	36.6927	0	Yes	No
BHLHE23	0.495437	0.152413	5	Yes	3.23046	0.0387139	Yes	No
BHLHE40	0.449816	0.0196762	7	Yes	31.4386	0	Yes	No
BHLHE41	0.394051	0.0623298	5	Yes	8.26625	0.000235828	Yes	No
BHMT	0.402807	0.0545549	6	Yes	0.343217	1.20213	No	No
BID	0.483187	0.0624822	5	Yes	4e-07	14.5936	No	Yes
BIK	0.445792	0.094661	5	Yes	1.67292	0.191493	No	No
BIN2	0.508855	0.066391	4	Yes	0.00606053	4.93301	No	Yes
BIN3	0.507338	0.0537733	5	Yes	0.259373	1.4471	No	No
BIRC2	0.331438	0.0841582	6	Yes	0.932033	0.484033	No	No
BIRC5	0.498392	0.0244506	4	Yes	0	0	No	No
BIRC6	0.327242	0.0110556	4	Yes	142.582	0	Yes	No
BIVM	0.356088	0.0219846	6	Yes	1.31341	0.301565	No	No
BLCAP	0.488657	0.0207237	7	Yes	11.0584	1.42001e-05	Yes	No
BLK	0.579174	0.0677727	4	Yes	0	0	No	No
BLMH	0.435963	0.047758	7	Yes	3.7889	0.0217653	Yes	No
BLNK	0.412276	0.0464337	6	Yes	1.49249	0.239954	No	No
BLOC1S1	0.511277	0.105593	5	Yes	0.954168	0.465711	No	No
BLOC1S2	0.381038	0.0419293	5	Yes	1.88841	0.152752	No	No
BLOC1S3	0.509767	0.117713	5	Yes	0.0136553	4.23478	No	Yes
BLOC1S4	0.370516	0.020333	6	Yes	1.02232	0.427709	No	No
BLOC1S5	0.410998	0.0557817	5	Yes	0.198732	1.66951	No	No
BLOC1S6	0.388861	0.0362245	5	Yes	0.01038	4.52335	No	Yes
BLVRA	0.420683	0.0597902	5	Yes	0.373567	1.13177	No	No
BLVRB	0.407569	0.10215	5	Yes	2.29426	0.0967052	No	No
BLZF1	0.351916	0.0240993	4	Yes	2.96861	0.0498746	No	No
BMI1	0.34863	0.0491165	6	Yes	51.9453	0	Yes	No
BMP10	0.449076	0.120002	4	Yes	1.37647	0.277364	No	No
BMP15	0.459296	0.0687519	5	Yes	1.98822	0.140289	No	No
BMP2	0.341822	0.0447417	5	Yes	63.5747	0	Yes	No
BMP3	0.398211	0.10052	4	Yes	4.15723	0.0150929	Yes	No
BMP4	0.333006	0.0558543	6	Yes	8.52457	0.000179916	Yes	No
BMP5	0.341375	0.0239246	5	Yes	2.47208	0.0845021	No	No
BMP6	0.394618	0.0407726	4	Yes	3.67228	0.0241156	Yes	No
BMP7	0.502698	0.0128707	4	Yes	0.00297572	5.68803	No	Yes
BMPER	0.382629	0.0265816	7	Yes	6.15473	0.00200321	Yes	No
BMPR1A	0.333462	0.048977	6	Yes	1.12104	0.382353	No	No
BMPR1B	0.386539	0.0415578	6	Yes	3.40938	0.0317868	Yes	No
BMPR2	0.311665	0.0210433	6	Yes	23.4927	0	Yes	No
BMS1	0.394235	0.0622749	7	Yes	2.03316	0.136612	No	No
BNIP2	0.370426	0.0651149	4	Yes	3.8584	0.0199662	Yes	No
BNIP3	0.388765	0.0622879	6	Yes	1.37994	0.281217	No	No
BNIP3L	0.381595	0.0265819	7	Yes	30.6929	0	Yes	No
BNIPL	0.452792	0.027264	4	Yes	0.985078	0.449808	No	No
BOC	0.382468	0.0767599	4	Yes	1.95859	0.146167	No	No
BOK	0.607831	0.0491201	6	Yes	0.000111206	8.97749	No	Yes
BOLA1	0.438047	0.0812418	5	Yes	0.070697	2.58983	No	No
BOLA3	0.372654	0.0629784	6	Yes	1.31224	0.297417	No	No
BOP1	0.531747	0.0543348	4	Yes	0.387542	1.07551	No	No
BORA	0.366848	0.0270981	5	Yes	2.069	0.128358	No	No
BORCS5	0.482466	0.0479435	5	Yes	0.00783814	4.77342	No	Yes
BORCS6	0.555197	0.0228828	5	Yes	9.23327	7.32027e-05	Yes	No
BORCS7	0.405773	0.0646268	5	Yes	0.478351	0.946081	No	No
BPGM	0.40484	0.0596192	7	Yes	1.714	0.193152	No	No
BPHL	0.441669	0.057989	4	Yes	0.327396	1.19776	No	No
BPI	0.509535	0.0560183	4	Yes	0.0215459	3.595	No	Yes
BPIFB1	0.548148	0.0156342	4	Yes	0.232697	1.33464	No	No
BPIFB2	0.509121	0.0688351	4	Yes	0.234313	1.45883	No	No
BPIFB3	0.588945	0.0528499	4	Yes	0.975631	0.385128	No	No
BPIFB4	0.563779	0.0265407	4	Yes	2.67486	0.05306	No	No
BPIFC	0.440464	0.0235282	4	Yes	0.0267243	3.46549	No	Yes
BPNT1	0.340218	0.0296607	5	Yes	0.287026	1.34855	No	No
BRAP	0.402888	0.0380503	5	Yes	4.672	0.00877862	Yes	No
BRCA1	0.39578	0.0781154	4	Yes	2.93843	0.0509365	No	No
BRCA2	0.320661	0.0420077	5	Yes	0.418817	1.03471	No	No
BRD1	0.37741	0.0471054	4	Yes	18.4393	0	Yes	No
BRD3	0.494378	0.0674391	5	Yes	0.119762	2.14533	No	No
BRD7	0.325065	0.0514109	5	Yes	5.70487	0.00258574	Yes	No
BRD9	0.437488	0.0947224	4	Yes	0.293974	1.3136	No	No
BRE	0.463871	0.0889837	5	Yes	1.8372	0.167869	No	No
BRF2	0.415301	0.0998808	6	Yes	0.386021	1.09951	No	No
BRI3	0.435363	0.053346	5	Yes	1.69572	0.19583	No	No
BRI3BP	0.430545	0.109994	7	Yes	1.14562	0.376473	No	No
BRICD5	0.532969	0.149657	4	Yes	0.230367	1.44537	No	No
BRINP1	0.43141	0.0572234	6	Yes	16.9664	0	Yes	No
BRINP2	0.466705	0.0603145	5	Yes	3.04956	0.0447757	Yes	No
BRIX1	0.332031	0.0878446	7	Yes	0.200393	1.66602	No	No
BRK1	0.449852	0.0506834	6	Yes	9.96709	4.08008e-05	Yes	No
BRMS1	0.543759	0.107566	4	Yes	1.22468	0.327177	No	No
BRMS1L	0.346383	0.0467566	6	Yes	14.7334	3e-07	Yes	No
BROX	0.389943	0.0429313	4	Yes	0.512787	0.88905	No	No
BRPF1	0.569113	0.0845103	4	Yes	10.7545	1.75002e-05	Yes	No
BRPF3	0.542122	0.0695843	4	Yes	7.23391	0.000620392	Yes	No
BRS3	0.39906	0.061724	4	Yes	0.571053	0.774015	No	No
BSCL2	0.449171	0.117375	4	Yes	1.13159	0.352252	No	No
BSDC1	0.464587	0.0654579	5	Yes	5.52653	0.00372212	Yes	No
BSND	0.457238	0.0845144	4	Yes	0.265345	1.41897	No	No
BSPRY	0.454797	0.101348	4	Yes	0.96926	0.453694	No	No
BST1	0.381261	0.0226716	4	Yes	0.655091	0.700664	No	No
BSX	0.521537	0.186484	5	Yes	1.17761	0.357077	No	No
BTBD1	0.343132	0.0485307	5	Yes	3.09045	0.0437034	Yes	No
BTBD10	0.37435	0.010896	5	Yes	53.5584	0	Yes	No
BTBD17	0.548108	0.10985	5	Yes	0.333928	1.21701	No	No
BTBD6	0.482217	0.0814314	4	Yes	0.103321	2.2274	No	No
BTBD9	0.467431	0.0951627	5	Yes	2.7554	0.061881	No	No
BTD	0.417981	0.0799273	5	Yes	0.420912	1.03442	No	No
BTF3	0.350333	0.0352122	5	Yes	11.9505	4.90001e-06	Yes	No
BTF3L4	0.360178	0.0109954	6	Yes	20.7823	0	Yes	No
BTG1	0.378344	0.0375107	8	Yes	18.6704	0	Yes	No
BTG2	0.460766	0.0495801	6	Yes	9.36576	7.89031e-05	Yes	No
BTG3	0.286038	0.0192352	4	Yes	22.2116	0	Yes	No
BTG4	0.346206	0.078852	6	Yes	1.56058	0.220211	No	No
BTK	0.494582	0.0932237	4	Yes	2.3214	0.0927567	No	No
BTN1A1	0.431708	0.041586	5	Yes	0.40036	1.07993	No	No
BUB1	0.374729	0.0147383	4	Yes	1.48701	0.243514	No	No
BUB1B	0.367931	0.053132	5	Yes	0.162013	1.83486	No	No
BUB3	0.406262	0.0604871	6	Yes	0.132999	2.04281	No	No
BUD13	0.477	0.0324075	4	Yes	0.136292	1.9409	No	No
BUD31	0.466165	0.128972	6	Yes	0.692946	0.637694	No	No
BVES	0.417139	0.0487724	4	Yes	0.0962194	2.27242	No	No
BYSL	0.472175	0.102046	6	Yes	0.351093	1.19245	No	No
BZW1	0.353221	0.0299933	5	Yes	9.88892	4.72011e-05	Yes	No
BZW2	0.430457	0.0702848	6	Yes	13.0492	1.7e-06	Yes	No
C1D	0.276221	0.0801209	5	Yes	0.700459	0.67011	No	No
C1GALT1	0.378042	0.0328008	5	Yes	7.41791	0.000561157	Yes	No
C1GALT1C1	0.31804	0.0393692	7	Yes	6.28102	0.00176235	Yes	No
C1QA	0.5231	0.105991	5	Yes	0.0510494	2.87425	No	No
C1QB	0.499341	0.0907281	5	Yes	0.61576	0.702623	No	No
C1QBP	0.369665	0.0307948	5	Yes	0.394466	1.04562	No	No
C1QC	0.483637	0.115847	5	Yes	0.0892064	2.35424	No	No
C1QL1	0.620916	0.10939	6	Yes	0.827951	0.538521	No	No
C1QL2	0.596896	0.0212743	4	Yes	1.02097	0.402369	No	No
C1QL3	0.368321	0.0113743	4	Yes	26.5762	0	Yes	No
C1QTNF1	0.55671	0.25076	5	Yes	1.16073	0.363733	No	No
C1QTNF2	0.449552	0.0214281	4	Yes	1.04003	0.415685	No	No
C1QTNF4	0.623487	0.146638	4	Yes	0.626361	0.699189	No	No
C2CD2	0.499912	0.0849505	4	Yes	0.377307	1.11991	No	No
C2CD2L	0.496422	0.0612263	6	Yes	3.17824	0.0403424	Yes	No
C2CD3	0.469984	0.100024	4	Yes	0.0240067	3.63825	No	Yes
C3	0.453406	0.0330161	4	Yes	0.190198	1.40999	No	No
C3AR1	0.405516	0.0283423	4	Yes	0.0264034	3.58581	No	Yes
C4A	0.500519	0.0940732	4	Yes	0.0616816	2.66594	No	No
C4BPA	0.33708	0.0448343	5	Yes	1.26645	0.314158	No	No
C6	0.384479	0.0659336	5	Yes	0.00237983	5.88146	No	Yes
C7	0.44998	0.0890485	4	Yes	0.119461	2.12149	No	No
C8A	0.369687	0.0796957	5	Yes	0.340338	1.21513	No	No
C8B	0.412646	0.0492061	4	Yes	1.07611	0.403867	No	No
CA14	0.42179	0.0604069	5	Yes	1.06476	0.410296	No	No
CA2	0.342967	0.0343295	6	Yes	6.84105	0.00101011	Yes	No
CA5B	0.35924	0.0298817	4	Yes	0.0510041	2.96547	No	No
CAAP1	0.228588	0.114442	5	Yes	3.27528	0.0358343	Yes	No
CAB39	0.394297	0.028344	5	Yes	22.1339	0	Yes	No
CAB39L	0.417295	0.0462501	5	Yes	4.68404	0.00870669	Yes	No
CABP4	0.449014	0.0986439	5	Yes	0.606291	0.757156	No	No
CABP5	0.465442	0.0422054	4	Yes	0.000184117	8.38444	No	Yes
CACNA1D	0.492254	0.128467	4	Yes	4.29748	0.0127819	Yes	No
CACNA2D3	0.367826	0.0142113	4	Yes	34.0591	0	Yes	No
CACNB1	0.536414	0.0492736	4	Yes	4.00593	0.0173128	Yes	No
CACNB3	0.541482	0.0744528	4	Yes	2.17733	0.116908	No	No
CACNG1	0.58492	0.066658	5	Yes	0.0295615	3.43693	No	Yes
CACNG2	0.446738	0.0744617	5	Yes	4.35149	0.0122988	Yes	No
CACNG3	0.516392	0.0379458	5	Yes	14.2925	5e-07	Yes	No
CACUL1	0.392317	0.0144132	4	Yes	1.21271	0.342938	No	No
CACYBP	0.351125	0.0182778	6	Yes	1.88912	0.156223	No	No
CALB1	0.336352	0.016702	4	Yes	40.0631	0	Yes	No
CALB2	0.549507	0.0445921	4	Yes	0.42864	0.994057	No	No
CALCOCO2	0.413197	0.0459162	4	Yes	2.17455	0.115829	No	No
CALCRL	0.341175	0.0279022	4	Yes	1.23381	0.331643	No	No
CALHM2	0.452335	0.0695564	6	Yes	1.21353	0.341491	No	No
CALM1	0.41065	0.0214915	4	Yes	35.9278	0	Yes	No
CALM3	0.558948	0.0213466	4	Yes	13.336	1.2e-06	Yes	No
CALML4	0.457437	0.0508805	4	Yes	1.43843	0.249459	No	No
CALR	0.481093	0.0629215	7	Yes	7.77581	0.000384674	Yes	No
CAMK1	0.491008	0.0551173	6	Yes	1.04699	0.414085	No	No
CAMK2N1	0.425381	0.0538582	5	Yes	17.1317	0	Yes	No
CAMK2N2	0.624586	0.162009	7	Yes	20.4121	0	Yes	No
CAMKK1	0.516257	0.125337	4	Yes	2.21897	0.108981	No	No
CAMKMT	0.411814	0.0360673	6	Yes	0.74495	0.620918	No	No
CAMKV	0.544028	0.0351073	5	Yes	10.706	1.99002e-05	Yes	No
CAMLG	0.388641	0.038696	6	Yes	3.83286	0.0203139	Yes	No
CAMP	0.426083	0.0586236	6	Yes	0.249086	1.24262	No	No
CAND1	0.3563	0.0349592	6	Yes	4.84348	0.00758036	Yes	No
CANX	0.380948	0.00902175	6	Yes	22.3867	0	Yes	No
CAP1	0.462555	0.0362978	4	Yes	3.36383	0.0327884	Yes	No
CAP2	0.393252	0.0676522	6	Yes	2.53574	0.0785737	No	No
CAPG	0.506449	0.164134	4	Yes	0.835981	0.496545	No	No
CAPN1	0.579456	0.0760054	5	Yes	0.374723	1.11751	No	No
CAPN11	0.578476	0.0173911	4	Yes	0.0677626	2.64618	No	No
CAPN12	0.488068	0.0326572	4	Yes	0.855252	0.523489	No	No
CAPN2	0.403846	0.0190211	4	Yes	0.000166314	8.45618	No	Yes
CAPN5	0.533241	0.0243907	4	Yes	0.362354	1.16264	No	No
CAPN6	0.460369	0.0137144	4	Yes	46.5816	0	Yes	No
CAPN7	0.383426	0.0316657	6	Yes	1.48937	0.246841	No	No
CAPN8	0.450517	0.0596855	5	Yes	0.301206	1.29885	No	No
CAPN9	0.431379	0.092675	4	Yes	1.28458	0.302546	No	No
CAPNS2	0.42585	0.0607072	4	Yes	1.19644	0.328574	No	No
CAPRIN1	0.364221	0.0132738	4	Yes	16.5	1e-07	Yes	No
CAPZA1	0.378061	0.0277501	7	Yes	10.0071	4.09008e-05	Yes	No
CAPZA2	0.327208	0.0261606	8	Yes	57.8644	0	Yes	No
CAPZA3	0.449515	0.0707128	4	Yes	1.27859	0.262672	No	No
CARD19	0.515093	0.164532	4	Yes	0.399077	0.944066	No	No
CARD6	0.420424	0.0125197	4	Yes	0	0	No	No
CARD9	0.481934	0.155937	4	Yes	1.9942	0.135494	No	No
CARHSP1	0.552038	0.0478407	4	Yes	3.1e-06	12.4841	No	Yes
CARNMT1	0.337941	0.0181457	4	Yes	3.48065	0.0284336	Yes	No
CARS	0.484349	0.128512	5	Yes	2.55921	0.0750049	No	No
CARS2	0.493494	0.057066	4	Yes	5.20014e-05	9.21063	No	Yes
CARTPT	0.390459	0.0209831	4	Yes	7.36341	0.000427691	Yes	No
CASK	0.338081	0.016569	4	Yes	33.0723	0	Yes	No
CASP2	0.469027	0.0778699	5	Yes	0.249364	1.47154	No	No
CASP3	0.375788	0.0349081	4	Yes	0.153379	1.90382	No	No
CASP6	0.33356	0.0372174	5	Yes	3.55427	0.0276077	Yes	No
CASP8	0.370874	0.0712309	5	Yes	1.40266	0.267646	No	No
CASP9	0.492678	0.166334	4	Yes	0.380076	1.12307	No	No
CASQ1	0.498142	0.0301927	4	Yes	3.25832	0.0316174	Yes	No
CASQ2	0.450467	0.0425873	8	Yes	2.91883	0.0526992	No	No
CAT	0.350927	0.028295	8	Yes	1.59321	0.220225	No	No
CAV2	0.342061	0.0252236	5	Yes	7.597	0.000467509	Yes	No
CAV3	0.53397	0.0766424	7	Yes	0.450436	0.976544	No	No
CBFB	0.352344	0.0350711	5	Yes	25.9305	0	Yes	No
CBL	0.435754	0.0344764	6	Yes	2.89134	0.0558436	No	No
CBLB	0.440162	0.0579261	4	Yes	2.00793	0.138791	No	No
CBLL1	0.325579	0.0123487	5	Yes	12.732	2.7e-06	Yes	No
CBLN1	0.42383	0.0865462	7	Yes	13.1942	1.7e-06	Yes	No
CBLN2	0.411105	0.0384147	6	Yes	17.8198	0	Yes	No
CBLN3	0.506508	0.0304249	4	Yes	0.209361	1.6177	No	No
CBLN4	0.362531	0.0317444	8	Yes	46.3198	0	Yes	No
CBR1	0.402569	0.049575	5	Yes	1.22539	0.338794	No	No
CBR3	0.416688	0.0390889	6	Yes	1.09011	0.367369	No	No
CBR4	0.348281	0.0352392	7	Yes	1.88002e-05	10.7993	No	Yes
CBX3	0.330364	0.0244212	6	Yes	3.79494	0.0215331	Yes	No
CBX4	0.4443	0.0890226	5	Yes	3.16662	0.04149	Yes	No
CBX5	0.41521	0.0249973	4	Yes	4.78356	0.00767971	Yes	No
CBX6	0.528506	0.0913957	4	Yes	0.644904	0.727713	No	No
CBX7	0.508669	0.0843204	4	Yes	0.711267	0.657485	No	No
CBX8	0.420999	0.0215013	5	Yes	2.91482	0.0506263	No	No
CBY1	0.524038	0.0866089	5	Yes	0.468971	0.944164	No	No
CC2D1A	0.610608	0.0709105	5	Yes	1.03744	0.407124	No	No
CCAR1	0.307002	0.0351874	5	Yes	3.93587	0.0180116	Yes	No
CCAR2	0.504368	0.0237121	5	Yes	14.1975	5e-07	Yes	No
CCDC102A	0.468549	0.0768452	6	Yes	0.526756	0.865848	No	No
CCDC105	0.521383	0.040096	4	Yes	0.480625	0.804578	No	No
CCDC114	0.488921	0.0917255	4	Yes	0.194822	1.65799	No	No
CCDC115	0.402124	0.0730795	4	Yes	0.0913179	2.37949	No	No
CCDC12	0.475064	0.0637125	6	Yes	0.493375	0.907884	No	No
CCDC124	0.520279	0.120289	5	Yes	1.35788	0.281325	No	No
CCDC126	0.33283	0.0336375	6	Yes	14.228	6e-07	Yes	No
CCDC127	0.440989	0.0822215	5	Yes	0.844084	0.541238	No	No
CCDC130	0.44314	0.0936412	4	Yes	1.26508	0.310136	No	No
CCDC134	0.536793	0.0920055	4	Yes	0.546756	0.842959	No	No
CCDC137	0.487932	0.0917926	5	Yes	0	0	No	No
CCDC146	0.397749	0.0436315	5	Yes	0.0364967	3.19778	No	Yes
CCDC153	0.443993	0.0576086	5	Yes	0.654994	0.68912	No	No
CCDC160	0.289625	0.0596116	4	Yes	1.56063	0.215042	No	No
CCDC167	0.525268	0.0814444	6	Yes	0.207699	1.61774	No	No
CCDC172	0.385664	0.0556059	4	Yes	0.000463007	7.40108	No	Yes
CCDC174	0.390115	0.0890527	8	Yes	0.445406	0.997653	No	No
CCDC181	0.375216	0.0946163	4	Yes	0.0394991	2.92342	No	No
CCDC183	0.489759	0.094955	4	Yes	1.15698	0.271024	No	No
CCDC184	0.511857	0.00857598	5	Yes	94.1685	0	Yes	No
CCDC185	0.395597	0.0259075	4	Yes	0.707155	0.544234	No	No
CCDC189	0.567132	0.0117596	4	Yes	6.89425	0.000850962	Yes	No
CCDC190	0.404634	0.0580696	4	Yes	0.000483217	7.38212	No	Yes
CCDC22	0.515431	0.106087	7	Yes	2.00409	0.137695	No	No
CCDC24	0.51065	0.0912038	4	Yes	1.80724	0.165803	No	No
CCDC25	0.415349	0.0326591	4	Yes	0.204587	1.60824	No	No
CCDC28A	0.44268	0.0878261	4	Yes	2.06526	0.12439	No	No
CCDC28B	0.501123	0.139667	5	Yes	0.760868	0.593125	No	No
CCDC39	0.304892	0.0189745	5	Yes	0.00455074	5.29035	No	Yes
CCDC42	0.516141	0.0509291	4	Yes	0.00117859	6.30819	No	Yes
CCDC43	0.400093	0.055639	6	Yes	3.11414	0.0432243	Yes	No
CCDC47	0.36443	0.0272225	7	Yes	5.9224	0.0024895	Yes	No
CCDC50	0.387705	0.04976	4	Yes	2.15522	0.117714	No	No
CCDC51	0.401937	0.0484577	5	Yes	1.27872	0.311983	No	No
CCDC53	0.346099	0.0239505	4	Yes	3.04348	0.0464326	Yes	No
CCDC58	0.395642	0.0347186	4	Yes	7.37026	0.000501926	Yes	No
CCDC59	0.323492	0.0296728	4	Yes	0.135239	1.97099	No	No
CCDC6	0.406641	0.0387336	4	Yes	27.6287	0	Yes	No
CCDC61	0.525681	0.124205	5	Yes	0.914591	0.487539	No	No
CCDC65	0.360112	0.0873341	5	Yes	0.000715556	7.03243	No	Yes
CCDC69	0.496267	0.0558356	6	Yes	3.24005e-05	10.237	No	Yes
CCDC71	0.516544	0.0645678	6	Yes	1.33325	0.293015	No	No
CCDC80	0.376009	0.0466457	5	Yes	4.0243	0.0163746	Yes	No
CCDC82	0.363535	0.0448517	4	Yes	0.242337	1.50766	No	No
CCDC84	0.347882	0.0433391	4	Yes	1.05458	0.397743	No	No
CCDC85B	0.586435	0.134836	4	Yes	1.30648	0.304197	No	No
CCDC86	0.554664	0.0527013	4	Yes	8.70004e-06	11.4221	No	Yes
CCDC87	0.416077	0.0268899	4	Yes	0.246605	1.45194	No	No
CCDC90B	0.341274	0.0441671	5	Yes	2.97301	0.0493322	No	No
CCDC91	0.387741	0.0888898	4	Yes	2.81004e-05	10.2224	No	Yes
CCDC92	0.508801	0.0526098	5	Yes	0.32646	1.23975	No	No
CCDC93	0.419038	0.0498371	5	Yes	1.20465	0.348831	No	No
CCDC94	0.523366	0.0985203	5	Yes	0.00810213	4.72834	No	Yes
CCDC96	0.449688	0.0889755	4	Yes	0.00231187	5.98767	No	Yes
CCDC97	0.536466	0.0833758	5	Yes	0	0	No	No
CCHCR1	0.521843	0.0904129	4	Yes	0.644844	0.695071	No	No
CCIN	0.315171	0.0389247	5	Yes	6.14577	0.00121694	Yes	No
CCKAR	0.463553	0.0887116	5	Yes	0.130538	2.03965	No	No
CCKBR	0.570967	0.153571	4	Yes	0.110124	2.18175	No	No
CCL1	0.478647	0.0308769	4	Yes	0.556931	0.771291	No	No
CCL11	0.362383	0.00243583	4	Yes	3e-07	14.8186	No	Yes
CCL17	0.554187	0.0364142	4	Yes	0.133395	1.93345	No	No
CCL19	0.545244	0.0128056	4	Yes	0.698866	0.652309	No	No
CCL2	0.29959	0.0169008	5	Yes	0.258453	1.35946	No	No
CCL22	0.513389	0.00518593	4	Yes	1e-07	15.9053	No	Yes
CCL5	0.51778	0.0541693	4	Yes	0.0176144	3.80809	No	Yes
CCM2	0.577946	0.0250442	5	Yes	0.66071	0.683425	No	No
CCNA2	0.318421	0.0382455	8	Yes	1.6024	0.216274	No	No
CCNB1	0.324096	0.0440213	7	Yes	0.356839	1.17732	No	No
CCNB2	0.362353	0.036061	8	Yes	1.6466	0.195758	No	No
CCNB3	0.304052	0.0581571	4	Yes	1.82438	0.160186	No	No
CCNC	0.340485	0.0226376	5	Yes	10.154	3.58006e-05	Yes	No
CCND1	0.460465	0.0806139	9	Yes	2.27103	0.10578	No	No
CCND2	0.456444	0.025394	4	Yes	8.50316	0.000181717	Yes	No
CCND3	0.542566	0.0413369	5	Yes	0.878424	0.517202	No	No
CCNDBP1	0.393663	0.0130944	4	Yes	0.560715	0.823784	No	No
CCNE1	0.433014	0.0681366	6	Yes	4.97961	0.00632657	Yes	No
CCNE2	0.35357	0.0564878	6	Yes	7.67482	0.000428392	Yes	No
CCNF	0.456146	0.0970415	6	Yes	0.000909313	6.91674	No	Yes
CCNG2	0.354627	0.0338803	5	Yes	5.28907	0.00482693	Yes	No
CCNH	0.314782	0.0267132	6	Yes	2.48426	0.0816415	No	No
CCNI	0.377973	0.0360344	7	Yes	4.94665	0.00659309	Yes	No
CCNK	0.420318	0.058924	7	Yes	1.87525	0.16183	No	No
CCNL1	0.311813	0.0108995	4	Yes	19.7721	0	Yes	No
CCNL2	0.415599	0.0359649	5	Yes	1.17896	0.349701	No	No
CCNY	0.455066	0.0699276	4	Yes	1.20398	0.336754	No	No
CCR1	0.43882	0.111558	5	Yes	0	0	No	No
CCR10	0.458909	0.0892116	4	Yes	2.09911	0.122986	No	No
CCR4	0.428768	0.0382427	4	Yes	0	0	No	No
CCR5	0.400087	0.0154091	5	Yes	0	0	No	No
CCS	0.518761	0.0674833	7	Yes	0.590363	0.772543	No	No
CCSAP	0.411224	0.078511	4	Yes	0.148141	1.92323	No	No
CCT2	0.366972	0.0358395	7	Yes	5.04444	0.00551981	Yes	No
CCT3	0.468721	0.0265289	5	Yes	4.96277	0.00591908	Yes	No
CCT4	0.403211	0.0304709	6	Yes	1.95463	0.13971	No	No
CCT5	0.378156	0.0367786	7	Yes	1.18255	0.354076	No	No
CCT6A	0.388424	0.0514361	5	Yes	1.50218	0.236849	No	No
CCT7	0.452665	0.0554947	7	Yes	0.384045	1.0915	No	No
CCT8	0.345605	0.0276338	6	Yes	0.201657	1.64675	No	No
CCZ1	0.318947	0.0301544	5	Yes	8.44774	0.000176316	Yes	No
CD14	0.459956	0.0473423	4	Yes	0.0419631	2.94672	No	No
CD151	0.489351	0.11748	5	Yes	0.936686	0.484224	No	No
CD164	0.374943	0.0313165	5	Yes	4.44061	0.0111285	Yes	No
CD164L2	0.544864	0.0780219	4	Yes	0.683812	0.648825	No	No
CD177	0.535902	0.0244994	4	Yes	0.0128372	4.18505	No	Yes
CD274	0.438243	0.00980112	4	Yes	0.00366129	5.4939	No	Yes
CD28	0.444345	0.0791996	6	Yes	2.08783	0.127933	No	No
CD2AP	0.356965	0.0486924	8	Yes	6.05005	0.00225003	Yes	No
CD2BP2	0.475913	0.0687283	5	Yes	0.0384161	3.23179	No	Yes
CD300LB	0.538948	0.0349733	4	Yes	0	20.8059	No	Yes
CD36	0.35022	0.0335922	6	Yes	3.12197	0.0421331	Yes	No
CD38	0.373125	0.0206244	8	Yes	0.00019792	8.46885	No	Yes
CD3D	0.498271	0.0174148	4	Yes	0.116604	2.12872	No	No
CD3E	0.518098	0.0315428	5	Yes	0.0750011	2.55611	No	No
CD4	0.55904	0.0908801	5	Yes	0.467362	0.949928	No	No
CD40	0.547044	0.114975	6	Yes	0.244525	1.47426	No	No
CD40LG	0.399513	0.184787	7	Yes	4.07928	0.0156842	Yes	No
CD44	0.418608	0.0151524	5	Yes	5.84916	0.00270987	Yes	No
CD47	0.387974	0.0289537	6	Yes	11.295	1.11001e-05	Yes	No
CD48	0.38567	0.0571863	4	Yes	0.29309	1.30208	No	No
CD52	0.564399	0.0187157	6	Yes	0.145632	1.80856	No	No
CD59	0.43434	0.0621237	4	Yes	0.0160659	4.05332	No	Yes
CD5L	0.470418	0.0465812	4	Yes	0	0	No	No
CD63	0.41032	0.0560119	4	Yes	1.64617	0.20329	No	No
CD69	0.401087	0.105909	5	Yes	1.46829	0.245401	No	No
CD7	0.589801	0.0557483	4	Yes	0	18.3366	No	Yes
CD79A	0.509086	0.110306	4	Yes	0.621281	0.733447	No	No
CD81	0.495062	0.0666159	6	Yes	0.917308	0.495145	No	No
CD82	0.504057	0.0684565	4	Yes	1.15542	0.365045	No	No
CD83	0.435627	0.0498353	4	Yes	0.883551	0.513902	No	No
CD86	0.394426	0.0425446	4	Yes	1.10796	0.381961	No	No
CD8A	0.441066	0.0778189	5	Yes	0.907448	0.497914	No	No
CD9	0.30441	0.0203095	7	Yes	8.77519	0.000125508	Yes	No
CD93	0.455658	0.0209848	4	Yes	8.19034e-05	9.3285	No	Yes
CD99	0.479256	0.147031	4	Yes	1.27775	0.317825	No	No
CDA	0.463478	0.0894691	6	Yes	0.839164	0.543137	No	No
CDC123	0.470499	0.10084	6	Yes	0.169644	1.78689	No	No
CDC16	0.409641	0.0758093	6	Yes	0.904416	0.490759	No	No
CDC20	0.324147	0.0504034	7	Yes	1.16122	0.3518	No	No
CDC23	0.406384	0.0312225	7	Yes	0.124863	2.10958	No	No
CDC25A	0.505525	0.0551788	5	Yes	1.53701	0.232064	No	No
CDC25C	0.424214	0.0611804	4	Yes	0.29634	1.30446	No	No
CDC26	0.437695	0.127878	5	Yes	3.45047	0.0276537	Yes	No
CDC27	0.410769	0.0377684	5	Yes	8.30574	0.000230227	Yes	No
CDC34	0.5502	0.0796649	5	Yes	0.0248827	3.60352	No	Yes
CDC37	0.533694	0.0855403	5	Yes	1.78822	0.17315	No	No
CDC37L1	0.315751	0.108388	6	Yes	2.97802	0.0499142	No	No
CDC40	0.372527	0.0405968	7	Yes	3.5528	0.0277367	Yes	No
CDC42	0.387081	0.0118137	4	Yes	17.4382	0	Yes	No
CDC42BPB	0.555067	0.0193416	4	Yes	1.29869	0.304231	No	No
CDC42EP1	0.599721	0.032693	4	Yes	0.00271619	5.71859	No	Yes
CDC42EP2	0.51673	0.128487	7	Yes	0.37414	1.12738	No	No
CDC42EP3	0.355638	0.0163979	5	Yes	4.27636	0.0131552	Yes	No
CDC42EP4	0.503036	0.0636466	5	Yes	0	17.4245	No	Yes
CDC5L	0.374254	0.0453428	7	Yes	2.56945	0.0771151	No	No
CDC6	0.37877	0.0541353	5	Yes	0.293812	1.33097	No	No
CDC7	0.318726	0.0644218	5	Yes	0.0902694	2.40176	No	No
CDC73	0.315571	0.0167067	7	Yes	4.75275	0.00831306	Yes	No
CDCA3	0.456617	0.0391053	4	Yes	0.230959	1.46184	No	No
CDCA4	0.386368	0.0711375	4	Yes	1.21966	0.335823	No	No
CDCA5	0.449715	0.0943119	6	Yes	0.232781	1.53837	No	No
CDCA7	0.412073	0.0475249	4	Yes	0.497899	0.903264	No	No
CDCA7L	0.435234	0.0190058	4	Yes	0.00299598	5.64061	No	Yes
CDCA8	0.475917	0.0925954	4	Yes	0.0257418	3.59107	No	Yes
CDH1	0.420865	0.0868767	5	Yes	0.0304184	3.45181	No	Yes
CDH11	0.322752	0.0166444	7	Yes	93.7133	0	Yes	No
CDH13	0.422474	0.0571474	6	Yes	6.66867	0.00115967	Yes	No
CDH15	0.532527	0.0698428	4	Yes	0.0817306	2.43673	No	No
CDH17	0.373661	0.0442465	6	Yes	2.6023	0.0725396	No	No
CDH19	0.395289	0.160869	4	Yes	0.595088	0.757267	No	No
CDH2	0.35731	0.0268275	7	Yes	65.9264	0	Yes	No
CDH20	0.495205	0.105021	6	Yes	6.97194	0.000822238	Yes	No
CDH22	0.577286	0.011195	4	Yes	5.39353	0.00361392	Yes	No
CDH5	0.499437	0.0566271	5	Yes	0.350639	1.1843	No	No
CDH6	0.364577	0.0437251	5	Yes	8.59383	0.000173115	Yes	No
CDH7	0.455126	0.109157	5	Yes	1.48219	0.236583	No	No
CDH8	0.350681	0.022461	5	Yes	1.49683	0.240337	No	No
CDHR1	0.508549	0.0581943	4	Yes	0.783777	0.584091	No	No
CDIP1	0.526287	0.0846243	7	Yes	1.55266	0.231905	No	No
CDIPT	0.494056	0.088434	6	Yes	1.00972	0.439406	No	No
CDK1	0.348044	0.0630918	7	Yes	0.8993	0.508273	No	No
CDK11B	0.432735	0.0858831	5	Yes	0.983198	0.443273	No	No
CDK17	0.379373	0.0252898	4	Yes	8.86631	0.000127708	Yes	No
CDK18	0.542165	0.10796	4	Yes	0.222073	1.56912	No	No
CDK2	0.402767	0.0789428	4	Yes	2.68602	0.0663421	No	No
CDK20	0.50683	0.0958661	5	Yes	0.0267375	3.54963	No	Yes
CDK2AP1	0.386977	0.0553812	5	Yes	9.86936	4.3901e-05	Yes	No
CDK2AP2	0.480545	0.105917	6	Yes	2.9502	0.0485883	No	No
CDK4	0.462237	0.0155668	5	Yes	0.20404	1.58721	No	No
CDK5	0.553426	0.113836	6	Yes	2.18923	0.113784	No	No
CDK5R1	0.456258	0.0507642	4	Yes	13.6507	9e-07	Yes	No
CDK5R2	0.561233	0.0789436	4	Yes	9.99815	3.97008e-05	Yes	No
CDK5RAP1	0.345891	0.0515119	5	Yes	1.40545	0.252499	No	No
CDK5RAP3	0.457635	0.151272	6	Yes	0.216273	1.55763	No	No
CDK6	0.456656	0.0319036	5	Yes	11.7737	7.30003e-06	Yes	No
CDK7	0.340527	0.0512566	5	Yes	0.851986	0.547385	No	No
CDK8	0.421188	0.0187243	5	Yes	15.8538	1e-07	Yes	No
CDK9	0.491161	0.0756462	7	Yes	0.0281618	3.53076	No	Yes
CDKAL1	0.420118	0.0605569	5	Yes	0.1806	1.75868	No	No
CDKL1	0.422516	0.0512659	4	Yes	0.0160255	4.03389	No	Yes
CDKL4	0.366619	0.0409303	4	Yes	0.00468375	5.22855	No	Yes
CDKN1A	0.503324	0.106207	4	Yes	2.11127	0.123256	No	No
CDKN2AIP	0.315936	0.0203678	5	Yes	11.7132	7.20003e-06	Yes	No
CDKN2AIPNL	0.402004	0.0621192	6	Yes	0.00913924	4.63079	No	Yes
CDKN2B	0.429127	0.0743425	5	Yes	0.0326906	3.38148	No	Yes
CDKN2C	0.344459	0.0123419	4	Yes	3.6428	0.0237713	Yes	No
CDKN3	0.388679	0.0889093	6	Yes	0.277604	1.35076	No	No
CDNF	0.378093	0.0361834	5	Yes	9.36044e-05	9.18535	No	Yes
CDO1	0.372465	0.03038	5	Yes	0.97063	0.452741	No	No
CDON	0.396705	0.0520706	4	Yes	0.680955	0.689378	No	No
CDPF1	0.57373	0.0945137	4	Yes	0.0052766	5.06332	No	Yes
CDR2	0.413616	0.0206369	7	Yes	1.23115	0.331863	No	No
CDS2	0.458946	0.0591275	5	Yes	1.18185	0.360469	No	No
CDV3	0.386419	0.0226549	5	Yes	8.16646	0.000263335	Yes	No
CDX1	0.515208	0.0714515	5	Yes	1.21821	0.339231	No	No
CDX2	0.536547	0.0213528	4	Yes	1.70612	0.18699	No	No
CDX4	0.352614	0.0279887	5	Yes	4.57972	0.00960397	Yes	No
CDYL2	0.466575	0.0389985	4	Yes	4.25023	0.0134441	Yes	No
CEBPD	0.452243	0.0534129	6	Yes	1.78104	0.177102	No	No
CEBPG	0.388957	0.0161854	6	Yes	4.52266	0.0104458	Yes	No
CEBPZ	0.329514	0.0485447	7	Yes	2.36925	0.0925285	No	No
CECR5	0.505809	0.0203445	5	Yes	0.0341647	3.29882	No	Yes
CEL	0.460922	0.108026	6	Yes	0.408467	1.01606	No	No
CELA1	0.425535	0.06219	7	Yes	1.08004	0.379966	No	No
CELA2A	0.404575	0.0450456	5	Yes	0.37614	1.03433	No	No
CELA3B	0.448666	0.0259867	5	Yes	0.222687	1.31359	No	No
CELSR3	0.523139	0.00600346	4	Yes	18.701	0	Yes	No
CEND1	0.610912	0.0374699	5	Yes	5.60002e-06	11.9059	No	Yes
CENPF	0.377452	0.0395544	5	Yes	0.00971474	4.55933	No	Yes
CENPH	0.409761	0.068183	4	Yes	0.000532842	7.35804	No	Yes
CENPL	0.376072	0.0419243	6	Yes	0.809602	0.565968	No	No
CENPM	0.533099	0.091884	4	Yes	0.407332	1.05908	No	No
CENPN	0.383861	0.0764579	5	Yes	0.549918	0.836027	No	No
CENPP	0.350866	0.0328121	4	Yes	1.63953	0.190708	No	No
CENPQ	0.375193	0.0893425	5	Yes	0.0547342	2.85572	No	No
CENPT	0.463592	0.0573118	5	Yes	1.0923	0.386831	No	No
CENPW	0.313455	0.0334364	4	Yes	1.06071	0.404377	No	No
CEP120	0.350045	0.0529958	4	Yes	0.331315	1.22826	No	No
CEP19	0.409774	0.0603805	6	Yes	0.337897	1.21232	No	No
CEP290	0.25456	0.0355114	6	Yes	0.405421	1.05806	No	No
CEP295	0.331666	0.120958	4	Yes	0.101923	2.17602	No	No
CEP41	0.415479	0.0432219	6	Yes	3.54624	0.0279551	Yes	No
CEP44	0.258127	0.0487004	5	Yes	1.85312	0.161316	No	No
CEP57L1	0.320424	0.1051	4	Yes	1.68071	0.184082	No	No
CEP70	0.294617	0.0747192	4	Yes	0.662039	0.688053	No	No
CEP76	0.277002	0.0548919	5	Yes	2.21975	0.110095	No	No
CEP97	0.372205	0.067621	4	Yes	0.74633	0.610271	No	No
CEPT1	0.354297	0.0202992	4	Yes	14.1225	6e-07	Yes	No
CER1	0.394337	0.0231429	5	Yes	0.0176932	3.92656	No	Yes
CERS2	0.457456	0.014272	4	Yes	3.6207	0.025735	Yes	No
CERS3	0.451134	0.0158268	4	Yes	0.000712854	7.15425	No	Yes
CERS4	0.551132	0.106379	4	Yes	0.0427954	3.08204	No	Yes
CERS5	0.461053	0.0460958	4	Yes	1.06698	0.404535	No	No
CES5A	0.384127	0.0287768	4	Yes	1.57586	0.207973	No	No
CETN1	0.39137	0.0293075	6	Yes	2.57065	0.0753002	No	No
CETN2	0.381955	0.0135912	5	Yes	2.37869	0.0881146	No	No
CETN3	0.285985	0.0412683	5	Yes	4.14112	0.014233	Yes	No
CETN4	0.299885	0.0408493	4	Yes	0.797288	0.558309	No	No
CFAP100	0.471263	0.141253	4	Yes	0.300194	1.26279	No	No
CFAP126	0.418689	0.0374972	5	Yes	0.49635	0.900816	No	No
CFAP157	0.429034	0.102691	5	Yes	1.24701	0.295923	No	No
CFAP161	0.366542	0.0516318	7	Yes	0.189197	1.70104	No	No
CFAP20	0.40821	0.0161386	5	Yes	4.2005	0.0133005	Yes	No
CFAP206	0.363743	0.0645252	4	Yes	0.0413054	2.93818	No	No
CFAP36	0.319852	0.112042	7	Yes	2.82495	0.057051	No	No
CFAP45	0.442413	0.041445	6	Yes	1.25337	0.297403	No	No
CFAP52	0.369068	0.0854304	4	Yes	1.14424	0.353578	No	No
CFAP53	0.309378	0.0347661	5	Yes	1.26037	0.322123	No	No
CFAP97	0.36784	0.0279222	5	Yes	1.39031	0.278833	No	No
CFD	0.424387	0.135922	4	Yes	1.09246	0.386369	No	No
CFDP1	0.400642	0.0921702	8	Yes	2.75773	0.0622968	No	No
CFI	0.340358	0.0195789	4	Yes	1.85686	0.148663	No	No
CFL1	0.508021	0.077509	7	Yes	11.9473	5.60002e-06	Yes	No
CFL2	0.368394	0.0312058	7	Yes	58.3555	0	Yes	No
CFTR	0.433898	0.0866893	5	Yes	0.379046	1.11879	No	No
CGA	0.411716	0.0657898	6	Yes	1.04425	0.417662	No	No
CGGBP1	0.338411	0.011432	4	Yes	13.1553	1.6e-06	Yes	No
CGN	0.505601	0.0409923	4	Yes	3.09582	0.0433087	Yes	No
CGRRF1	0.358065	0.0728286	6	Yes	1.34726	0.279071	No	No
CH25H	0.323881	0.046596	7	Yes	0.443882	0.98357	No	No
CHAC1	0.50017	0.0831727	5	Yes	1.57834	0.219944	No	No
CHAC2	0.297227	0.0409083	7	Yes	3.7372	0.0230319	Yes	No
CHAF1A	0.439562	0.079756	5	Yes	0.13707	1.97813	No	No
CHAF1B	0.453449	0.0819947	5	Yes	0.680137	0.669476	No	No
CHAMP1	0.381003	0.0455768	4	Yes	7.00002e-06	11.6242	No	Yes
CHCHD1	0.370434	0.027057	6	Yes	1.78036	0.174719	No	No
CHCHD2	0.364151	0.0223756	4	Yes	0.530094	0.828111	No	No
CHCHD3	0.38455	0.041582	5	Yes	3.24092	0.036183	Yes	No
CHCHD4	0.39797	0.0791228	6	Yes	2.0893	0.123557	No	No
CHD1	0.34112	0.0268338	6	Yes	68.9656	0	Yes	No
CHD2	0.519403	0.0840922	5	Yes	1.37955	0.282064	No	No
CHD8	0.462206	0.0394008	4	Yes	10.5374	2.19002e-05	Yes	No
CHDH	0.517432	0.0232791	4	Yes	0	0	No	No
CHEK1	0.422286	0.129915	5	Yes	0.563262	0.819984	No	No
CHEK2	0.336681	0.116377	6	Yes	1.2853	0.305224	No	No
CHERP	0.452867	0.0731847	7	Yes	9.30004e-06	11.4695	No	Yes
CHFR	0.418082	0.046113	4	Yes	1.66325	0.203672	No	No
CHGA	0.488728	0.0791565	6	Yes	1.56231	0.219479	No	No
CHGB	0.362308	0.0220481	5	Yes	3.49731	0.0277145	Yes	No
CHIA	0.34827	0.0636147	4	Yes	0.881864	0.461862	No	No
CHIC1	0.360008	0.0280867	4	Yes	6.18988	0.00196533	Yes	No
CHIC2	0.336395	0.0446735	7	Yes	15.9646	1e-07	Yes	No
CHID1	0.44419	0.127323	5	Yes	1.18963	0.339626	No	No
CHKB	0.544453	0.0910901	5	Yes	0.974054	0.457035	No	No
CHM	0.328895	0.00487671	4	Yes	4.09177	0.0160586	Yes	No
CHMP1A	0.547281	0.0738786	6	Yes	8.00003e-06	11.6146	No	Yes
CHMP1B	0.364099	0.0282096	7	Yes	0.775899	0.603082	No	No
CHMP2A	0.446261	0.0524434	4	Yes	0.701319	0.652396	No	No
CHMP2B	0.346935	0.0411998	5	Yes	8.22101	0.000242729	Yes	No
CHMP3	0.424151	0.0610632	5	Yes	0.64988	0.7233	No	No
CHMP4B	0.452791	0.0501251	5	Yes	29.0695	0	Yes	No
CHMP4C	0.389643	0.0428127	7	Yes	0.000322252	7.93366	No	Yes
CHMP5	0.315844	0.0171225	6	Yes	8.55526	0.000170815	Yes	No
CHMP6	0.556933	0.0839133	6	Yes	0.156168	1.89985	No	No
CHMP7	0.457296	0.0729491	6	Yes	0.766806	0.607287	No	No
CHN1	0.378769	0.0338405	4	Yes	11.6924	7.20003e-06	Yes	No
CHODL	0.359627	0.0284693	5	Yes	7.86252	0.00034706	Yes	No
CHORDC1	0.324437	0.0196883	5	Yes	0.0223341	3.7409	No	Yes
CHP1	0.419097	0.03228	7	Yes	0.762773	0.612871	No	No
CHP2	0.440525	0.0646179	5	Yes	0.470915	0.949538	No	No
CHPF2	0.504459	0.0415359	4	Yes	0.896645	0.494939	No	No
CHPT1	0.331318	0.0270616	5	Yes	3.52139	0.0284554	Yes	No
CHRAC1	0.418934	0.053975	7	Yes	0.185806	1.74091	No	No
CHRDL1	0.411642	0.0206446	4	Yes	5.22539	0.005063	Yes	No
CHRM3	0.43198	0.0185466	5	Yes	0.750063	0.61361	No	No
CHRM4	0.564761	0.0566572	6	Yes	0.313686	1.28303	No	No
CHRNA1	0.397315	0.0601177	5	Yes	0.000700745	7.19539	No	Yes
CHRNA2	0.502465	0.0435563	4	Yes	5.41015e-05	9.6919	No	Yes
CHRNA4	0.552693	0.028497	4	Yes	0.166412	1.83092	No	No
CHRNA5	0.378652	0.0517304	4	Yes	0.706185	0.656983	No	No
CHRNA6	0.403004	0.0432063	4	Yes	1.52242	0.234006	No	No
CHRNA7	0.499422	0.14479	5	Yes	0.893639	0.505773	No	No
CHRNB1	0.436625	0.0404803	4	Yes	0	0	No	No
CHRNB2	0.563695	0.0587069	6	Yes	0	0	No	No
CHRND	0.477666	0.115924	5	Yes	0.31751	1.2673	No	No
CHRNE	0.47135	0.0823531	5	Yes	1.41625	0.263337	No	No
CHRNG	0.437459	0.0718615	6	Yes	0.776035	0.591911	No	No
CHST1	0.488592	0.0571786	6	Yes	4.63658	0.00910916	Yes	No
CHST10	0.479546	0.095576	7	Yes	2.52003e-05	10.4858	No	Yes
CHST11	0.419887	0.0477402	6	Yes	3.09889	0.0446345	Yes	No
CHST12	0.45885	0.0662715	4	Yes	1.00138	0.434075	No	No
CHST13	0.550278	0.111824	4	Yes	1.88002e-05	10.694	No	Yes
CHST14	0.454033	0.0624286	5	Yes	0.65689	0.698985	No	No
CHST2	0.405284	0.0212139	4	Yes	5.97155	0.0022822	Yes	No
CHST4	0.432631	0.0656348	5	Yes	0.0181538	3.92501	No	Yes
CHST9	0.337801	0.0174143	4	Yes	8.75329	0.000111006	Yes	No
CHSY1	0.361323	0.0384011	6	Yes	8.73979	0.000145511	Yes	No
CHTF18	0.471539	0.0997158	6	Yes	0.535114	0.823892	No	No
CHTF8	0.475827	0.0957977	6	Yes	71.5768	0	Yes	No
CHUK	0.397484	0.11835	4	Yes	5.15689	0.00527861	Yes	No
CHURC1	0.408358	0.0833342	6	Yes	3.15307	0.0417849	Yes	No
CIAO1	0.405828	0.0558984	6	Yes	2e-07	15.5744	No	Yes
CIAPIN1	0.475992	0.0747228	5	Yes	0.519877	0.884976	No	No
CIB2	0.484848	0.102698	5	Yes	2.19451	0.113399	No	No
CIB3	0.501789	0.0774754	4	Yes	0.460356	0.923011	No	No
CIDEB	0.436177	0.0918022	6	Yes	0.158204	1.85946	No	No
CIDEC	0.440225	0.114821	4	Yes	2.7757	0.0600854	No	No
CILP	0.34802	0.0468089	4	Yes	2.36726	0.090581	No	No
CILP2	0.551843	0.0149498	4	Yes	1e-07	15.9114	No	Yes
CINP	0.45885	0.134914	5	Yes	0.125219	2.07675	No	No
CIPC	0.411604	0.0290231	5	Yes	1.96781	0.144799	No	No
CIRBP	0.430433	0.0387379	5	Yes	16.3987	1e-07	Yes	No
CISD1	0.378895	0.0553382	6	Yes	2.55209	0.0769601	No	No
CISD2	0.344774	0.040266	6	Yes	0.0579702	2.84957	No	No
CISH	0.528218	0.0805783	6	Yes	1.22051	0.335651	No	No
CITED1	0.387666	0.0211725	4	Yes	2.45221	0.073887	No	No
CITED2	0.345198	0.0121726	5	Yes	32.9646	0	Yes	No
CITED4	0.627411	0.0840998	5	Yes	0.389747	1.08859	No	No
CKAP2	0.364383	0.0311086	4	Yes	0.00973544	4.49202	No	Yes
CKAP4	0.394794	0.0773679	4	Yes	0.261903	1.42111	No	No
CKB	0.492428	0.0875704	6	Yes	11.4572	8.00003e-06	Yes	No
CKM	0.602481	0.105146	7	Yes	0.102654	2.23071	No	No
CKMT1B	0.505712	0.0704867	4	Yes	1.66521	0.183375	No	No
CKMT2	0.348729	0.0595152	5	Yes	4.90461	0.00529499	Yes	No
CKS1B	0.456199	0.086578	8	Yes	3.12251	0.0426203	Yes	No
CKS2	0.329021	0.0264835	8	Yes	11.9895	5.00001e-06	Yes	No
CLASRP	0.388021	0.0618578	4	Yes	2.26812	0.101745	No	No
CLCA1	0.3363	0.0496302	7	Yes	0.0856762	2.43867	No	No
CLCN1	0.535386	0.0618025	5	Yes	0.000239129	8.16707	No	Yes
CLCN6	0.555065	0.098911	5	Yes	0.0050634	5.22391	No	Yes
CLCN7	0.528076	0.120146	5	Yes	1.02329	0.430774	No	No
CLDN1	0.373877	0.0477655	8	Yes	3.01116	0.0485645	Yes	No
CLDN11	0.426867	0.0142633	4	Yes	18.8824	0	Yes	No
CLDN12	0.370584	0.0288368	5	Yes	3.28511	0.0366111	Yes	No
CLDN17	0.364559	0.110504	4	Yes	0.95317	0.449258	No	No
CLDN2	0.48836	0.0786155	6	Yes	1.20544	0.34469	No	No
CLDN22	0.428811	0.0575489	4	Yes	0.0264901	3.50098	No	Yes
CLDN3	0.627135	0.120672	8	Yes	0.124878	2.09957	No	No
CLDN4	0.569655	0.0221634	5	Yes	1e-07	16.2559	No	Yes
CLDN5	0.569064	0.0922033	5	Yes	1.08386	0.398014	No	No
CLDN6	0.506496	0.0181737	5	Yes	0	0	No	No
CLDN8	0.310546	0.0183292	6	Yes	4.88854	0.00698907	Yes	No
CLDND1	0.352863	0.0207843	5	Yes	5.19143	0.00508129	Yes	No
CLEC11A	0.557171	0.100326	4	Yes	0.0338112	3.24835	No	Yes
CLEC14A	0.388042	0.0248708	5	Yes	1.86672	0.161991	No	No
CLEC1A	0.379376	0.0133018	4	Yes	0	0	No	No
CLEC3A	0.455817	0.0868869	4	Yes	1.04267	0.417634	No	No
CLEC3B	0.540916	0.162839	4	Yes	1.08952	0.392813	No	No
CLGN	0.391975	0.048786	4	Yes	2.14652	0.115808	No	No
CLIC1	0.469347	0.0728192	5	Yes	1.70527	0.186636	No	No
CLIC2	0.35754	0.0946141	7	Yes	0.00153017	6.40499	No	Yes
CLIC3	0.535827	0.111534	5	Yes	0.12002	2.1421	No	No
CLIC4	0.390495	0.0487853	6	Yes	0.998076	0.44978	No	No
CLINT1	0.367843	0.0594132	4	Yes	21.2836	0	Yes	No
CLIP1	0.417214	0.0477694	4	Yes	1.45239	0.255107	No	No
CLIP3	0.479457	0.0495221	4	Yes	4.64813	0.00920695	Yes	No
CLK1	0.275409	0.0275112	4	Yes	2.94901	0.0476851	No	No
CLK2	0.472183	0.0201357	4	Yes	6.05038	0.0019988	Yes	No
CLK3	0.484853	0.0558882	5	Yes	6.70696	0.00104324	Yes	No
CLK4	0.30745	0.0411458	4	Yes	3.17764	0.0362264	Yes	No
CLMP	0.403014	0.0480522	5	Yes	0.808655	0.573327	No	No
CLN3	0.461674	0.114089	4	Yes	0.163632	1.80879	No	No
CLN5	0.421178	0.0403763	5	Yes	0	20.3696	No	Yes
CLN6	0.508547	0.113062	7	Yes	0	0	No	No
CLN8	0.493406	0.116062	6	Yes	0.118111	2.16937	No	No
CLP1	0.420861	0.0751662	6	Yes	0.631424	0.715249	No	No
CLPB	0.540235	0.0334213	4	Yes	0.00115927	6.61737	No	Yes
CLPP	0.507708	0.0844879	4	Yes	1.03088	0.408401	No	No
CLPS	0.500409	0.119889	4	Yes	0.29102	1.25143	No	No
CLPTM1	0.546188	0.103447	4	Yes	2.57437	0.0753716	No	No
CLPTM1L	0.425361	0.0863448	6	Yes	3.42034	0.0316329	Yes	No
CLRN3	0.450089	0.0362182	4	Yes	0.000820236	6.96568	No	Yes
CLSTN3	0.59806	0.075573	6	Yes	0.627803	0.734514	No	No
CLTA	0.393828	0.0382783	5	Yes	9.99585	3.80007e-05	Yes	No
CLTB	0.515455	0.0898581	4	Yes	1.99176	0.139726	No	No
CLTC	0.366546	0.00400858	5	Yes	99.8162	0	Yes	No
CLU	0.531548	0.0755656	8	Yes	0.405941	1.03755	No	No
CLUAP1	0.40157	0.0641036	6	Yes	2.01287	0.136106	No	No
CLUH	0.509833	0.105546	4	Yes	1.55677	0.223953	No	No
CLUL1	0.320424	0.0125123	4	Yes	0.682357	0.674882	No	No
CLVS1	0.42357	0.0721692	4	Yes	0.12909	2.02933	No	No
CLVS2	0.369673	0.065015	6	Yes	1.39353	0.280311	No	No
CMA1	0.516853	0.0319437	4	Yes	0.32073	1.11619	No	No
CMAS	0.350952	0.05168	5	Yes	1.16194	0.324127	No	No
CMBL	0.391775	0.0592916	6	Yes	0.0200136	3.86671	No	Yes
CMC1	0.349622	0.0571585	6	Yes	0.748699	0.625613	No	No
CMC2	0.407789	0.0398165	5	Yes	0.936805	0.476158	No	No
CMC4	0.34247	0.0110547	4	Yes	2.35754	0.0849069	No	No
CMKLR1	0.445967	0.106966	5	Yes	0.0993236	2.31413	No	No
CMPK1	0.334186	0.0117653	4	Yes	24.8428	0	Yes	No
CMSS1	0.414626	0.0546391	6	Yes	1.07007	0.381937	No	No
CMTM3	0.451004	0.0668976	5	Yes	0.675666	0.693793	No	No
CMTM6	0.331613	0.14485	7	Yes	8.70004e-06	11.5718	No	Yes
CMTM7	0.452531	0.0988307	6	Yes	0.726479	0.646794	No	No
CMTM8	0.310714	0.0452599	4	Yes	2.0853	0.114728	No	No
CMTR1	0.530162	0.0499971	6	Yes	0.238554	1.52576	No	No
CMYA5	0.410604	0.0295568	4	Yes	1.93402	0.144288	No	No
CNDP1	0.412618	0.0655067	5	Yes	5.12013e-05	9.74288	No	Yes
CNDP2	0.459097	0.100751	6	Yes	0.107779	2.21808	No	No
CNEP1R1	0.356063	0.0374433	6	Yes	17.3395	0	Yes	No
CNFN	0.494256	0.135299	4	Yes	0.966217	0.440465	No	No
CNGA1	0.381824	0.0437142	5	Yes	0.748691	0.59433	No	No
CNGA2	0.481427	0.0299804	4	Yes	0.387312	1.06827	No	No
CNGB3	0.3713	0.0160257	4	Yes	0.171842	1.78323	No	No
CNIH1	0.361337	0.0433385	8	Yes	28.567	0	Yes	No
CNIH4	0.426744	0.0497023	5	Yes	2.80221	0.0596978	No	No
CNKSR1	0.449372	0.0746873	5	Yes	1.34571	0.289468	No	No
CNKSR3	0.429469	0.0580179	7	Yes	2.55515	0.0779889	No	No
CNN1	0.52055	0.108696	4	Yes	3.48085	0.0292039	Yes	No
CNN2	0.464453	0.0693875	5	Yes	0.931426	0.487022	No	No
CNN3	0.372268	0.0411488	5	Yes	13.2882	1.4e-06	Yes	No
CNNM1	0.461706	0.0569407	5	Yes	2.82517	0.058486	No	No
CNNM4	0.516728	0.0262105	5	Yes	1.98544	0.141539	No	No
CNOT1	0.411909	0.0347538	5	Yes	7.1139	0.000725163	Yes	No
CNOT10	0.398247	0.0564992	5	Yes	1.12792	0.362995	No	No
CNOT11	0.394563	0.0393733	4	Yes	0.13615	2.01425	No	No
CNOT2	0.394943	0.0304467	6	Yes	95.057	0	Yes	No
CNOT4	0.441349	0.038934	4	Yes	2.81539	0.0572946	No	No
CNOT6L	0.340558	0.00778516	4	Yes	48.5779	0	Yes	No
CNOT7	0.355872	0.0113933	6	Yes	51.8536	0	Yes	No
CNOT8	0.417127	0.0340301	7	Yes	1.537	0.232701	No	No
CNP	0.530875	0.0117828	4	Yes	0.980863	0.456419	No	No
CNPPD1	0.474706	0.080872	7	Yes	1.18299	0.352413	No	No
CNPY2	0.402724	0.0482872	5	Yes	1.76305	0.175457	No	No
CNPY4	0.460937	0.0559104	6	Yes	0.0822795	2.47616	No	No
CNR1	0.396291	0.015488	5	Yes	22.6017	0	Yes	No
CNRIP1	0.395733	0.0337157	6	Yes	3.31401	0.0345748	Yes	No
CNTF	0.428875	0.0999223	5	Yes	1.2378	0.32763	No	No
CNTFR	0.53741	0.109027	6	Yes	6.62895	0.00119722	Yes	No
CNTN1	0.374054	0.0409835	4	Yes	3.13228	0.0415247	Yes	No
CNTN2	0.499013	0.0559786	6	Yes	4.30001e-06	12.2987	No	Yes
CNTN5	0.407594	0.122608	4	Yes	2.85938	0.0546474	No	No
CNTNAP1	0.513201	0.0792541	6	Yes	11.9426	5.50002e-06	Yes	No
COA3	0.483353	0.00851442	4	Yes	1.15372	0.330511	No	No
COA5	0.386541	0.0427143	8	Yes	0.0016148	6.37996	No	Yes
COA7	0.376103	0.135142	5	Yes	0.00436993	5.37318	No	Yes
COCH	0.326855	0.0484929	5	Yes	1.30076	0.300344	No	No
COG1	0.379052	0.0728264	4	Yes	0.506569	0.746098	No	No
COG2	0.454193	0.0416127	4	Yes	0.0336426	3.30693	No	Yes
COG3	0.437409	0.0614217	5	Yes	1.78589	0.176022	No	No
COG4	0.468832	0.120453	5	Yes	0.408704	1.0505	No	No
COG6	0.378558	0.0541662	5	Yes	0.250499	1.46887	No	No
COG7	0.391613	0.0372321	7	Yes	0.201252	1.66139	No	No
COG8	0.490172	0.11869	4	Yes	0.272125	1.34793	No	No
COIL	0.359498	0.0491926	5	Yes	1.91138	0.149985	No	No
COL10A1	0.334316	0.0185507	4	Yes	2.52283	0.0734683	No	No
COL14A1	0.386033	0.0265267	5	Yes	3.81837	0.0209679	Yes	No
COL15A1	0.392802	0.0486317	4	Yes	8.20707	0.000208622	Yes	No
COL1A1	0.451581	0.0354297	6	Yes	24.6108	0	Yes	No
COL1A2	0.343828	0.0162467	8	Yes	56.9069	0	Yes	No
COL2A1	0.435735	0.0572268	4	Yes	5.69582	0.0030667	Yes	No
COL3A1	0.322287	0.0198538	7	Yes	39.5657	0	Yes	No
COL4A4	0.419365	0.0257621	4	Yes	0.0174967	3.97835	No	Yes
COL6A2	0.487534	0.0762385	5	Yes	0.586417	0.780452	No	No
COL9A2	0.506177	0.0881285	7	Yes	2.08695	0.128766	No	No
COL9A3	0.444034	0.0813358	6	Yes	0.177825	1.77128	No	No
COLEC10	0.356775	0.0591391	5	Yes	1.13448	0.379467	No	No
COLEC12	0.35989	0.0318853	6	Yes	1.83567	0.167441	No	No
COLGALT1	0.517086	0.032761	4	Yes	2.26003e-05	10.4883	No	Yes
COMMD1	0.371992	0.0312514	5	Yes	0.490116	0.908533	No	No
COMMD2	0.385918	0.0434885	6	Yes	0.000195519	8.47356	No	Yes
COMMD3	0.413148	0.0413838	7	Yes	0.525728	0.8374	No	No
COMMD4	0.454546	0.104709	5	Yes	1.63401	0.204467	No	No
COMMD5	0.421961	0.0985443	5	Yes	1.75609	0.18059	No	No
COMMD8	0.363884	0.0412041	6	Yes	0.976539	0.461519	No	No
COMMD9	0.505074	0.103445	6	Yes	0.0165746	4.01529	No	Yes
COMP	0.570204	0.117409	5	Yes	0.406838	1.04376	No	No
COMT	0.520264	0.0977369	5	Yes	0	17.5106	No	Yes
COMTD1	0.487161	0.119149	6	Yes	0.000181516	8.50447	No	Yes
COPA	0.40785	0.0614548	6	Yes	1.00162	0.435148	No	No
COPB1	0.35918	0.0597881	6	Yes	9.78759	4.4701e-05	Yes	No
COPB2	0.371278	0.0379158	4	Yes	1.05553	0.39302	No	No
COPE	0.49419	0.115529	7	Yes	0.180172	1.72492	No	No
COPG1	0.480457	0.0968913	4	Yes	1.38879	0.260787	No	No
COPG2	0.392739	0.0227136	4	Yes	2.66087	0.0674809	No	No
COPRS	0.400942	0.0883219	4	Yes	0.000339558	7.632	No	Yes
COPS2	0.363785	0.0367195	6	Yes	49.514	0	Yes	No
COPS3	0.379374	0.0191128	5	Yes	4.4785	0.00999064	Yes	No
COPS4	0.41098	0.062112	7	Yes	3.44473	0.0292448	Yes	No
COPS5	0.335059	0.05055	7	Yes	3.44962	0.0284411	Yes	No
COPS6	0.521764	0.0324461	4	Yes	0.743679	0.568893	No	No
COPS7B	0.542742	0.0150102	4	Yes	32.504	0	Yes	No
COPS8	0.435401	0.038815	4	Yes	1.03489	0.419365	No	No
COPZ1	0.467972	0.0454663	5	Yes	1.33417	0.293704	No	No
COPZ2	0.511857	0.0850072	5	Yes	1.01207	0.434234	No	No
COQ10A	0.445429	0.0464792	4	Yes	0.474837	0.9238	No	No
COQ10B	0.404602	0.0542528	5	Yes	2.55864	0.0753924	No	No
COQ2	0.38509	0.0823354	5	Yes	1.58001e-05	10.869	No	Yes
COQ3	0.36741	0.0516697	6	Yes	1.27041	0.317668	No	No
COQ4	0.469818	0.0299522	4	Yes	0.289335	1.33626	No	No
COQ5	0.437985	0.0551802	5	Yes	0.401187	1.07128	No	No
COQ6	0.356315	0.0725399	5	Yes	0.793951	0.561885	No	No
COQ8A	0.514395	0.022847	4	Yes	0	0	No	No
COQ9	0.494054	0.0919751	7	Yes	0.673635	0.685782	No	No
CORO1B	0.510292	0.103017	4	Yes	1.48224	0.248655	No	No
CORO1C	0.42313	0.0606898	4	Yes	0.591143	0.78391	No	No
CORO6	0.501492	0.105059	5	Yes	1.08234	0.397679	No	No
CORO7	0.633725	0.0932751	4	Yes	0.852327	0.518725	No	No
CORT	0.453875	0.117116	4	Yes	0.00281606	5.57452	No	Yes
COTL1	0.508357	0.0736362	7	Yes	0.771181	0.603696	No	No
COX10	0.479521	0.0577583	7	Yes	1.5e-06	13.3122	No	Yes
COX11	0.337722	0.0250087	4	Yes	1.06548	0.40533	No	No
COX14	0.510426	0.119259	5	Yes	0.760147	0.587445	No	No
COX15	0.438281	0.128793	5	Yes	0.226478	1.57132	No	No
COX16	0.343818	0.0302601	6	Yes	1.29765	0.30455	No	No
COX18	0.33946	0.0525588	4	Yes	2.02274	0.130572	No	No
COX19	0.445802	0.0991065	7	Yes	0.00143112	6.50341	No	Yes
COX20	0.345605	0.0446194	6	Yes	0.487665	0.923274	No	No
COX4I1	0.458908	0.104975	6	Yes	1.08162	0.37693	No	No
COX4I2	0.580208	0.109724	6	Yes	0.0707519	2.5482	No	No
COX5B	0.418645	0.0263785	4	Yes	0.645667	0.567791	No	No
COX6A1	0.442527	0.0565348	6	Yes	2.02389	0.131827	No	No
COX6A2	0.509305	0.113118	6	Yes	0.967475	0.44251	No	No
COX6B1	0.489408	0.037931	6	Yes	2.49975	0.0741071	No	No
COX7A1	0.438057	0.110909	4	Yes	1.08082	0.381245	No	No
COX7A2	0.382457	0.0277999	5	Yes	3.75704	0.0211451	Yes	No
COX7B	0.34307	0.0316952	7	Yes	1.45945	0.251345	No	No
COX7B2	0.278866	0.0313607	4	Yes	0.714954	0.53832	No	No
COX8A	0.496188	0.0418401	6	Yes	3.32727	0.0311522	Yes	No
COX8B	0.468987	0.121118	4	Yes	0.298974	1.21894	No	No
CPA1	0.4269	0.0966813	7	Yes	1.15164	0.344564	No	No
CPA2	0.404494	0.0787255	5	Yes	0.854214	0.487587	No	No
CPA3	0.377807	0.02469	4	Yes	0.213091	1.50629	No	No
CPA5	0.429366	0.117827	5	Yes	0.158677	1.83065	No	No
CPA6	0.384281	0.00926895	4	Yes	2.1261	0.119494	No	No
CPB1	0.313545	0.029454	6	Yes	0.425121	0.961273	No	No
CPB2	0.313799	0.0235855	4	Yes	1.93298	0.131439	No	No
CPE	0.297231	0.127174	7	Yes	0.784474	0.598043	No	No
CPLX1	0.62096	0.0596406	5	Yes	4e-07	14.5718	No	Yes
CPLX2	0.481997	0.0830674	6	Yes	1.20929	0.346718	No	No
CPLX3	0.498993	0.0789543	6	Yes	0.84396	0.54598	No	No
CPM	0.427661	0.0330992	4	Yes	0.00387942	5.49953	No	Yes
CPN1	0.409983	0.0896582	7	Yes	2.27979	0.0986845	No	No
CPNE1	0.452864	0.0430537	4	Yes	0.449563	0.975265	No	No
CPNE2	0.459619	0.034802	5	Yes	18.0819	0	Yes	No
CPNE3	0.353557	0.00980587	5	Yes	0.0682073	2.68867	No	No
CPNE5	0.537966	0.053041	4	Yes	4e-07	14.6655	No	Yes
CPNE8	0.347786	0.0468364	4	Yes	19.0546	0	Yes	No
CPNE9	0.491882	0.0474413	4	Yes	0.758301	0.601836	No	No
CPOX	0.364874	0.019724	5	Yes	0.136789	2.0129	No	No
CPPED1	0.407523	0.0503115	6	Yes	0.000356664	7.85379	No	Yes
CPQ	0.361745	0.0159059	4	Yes	1.14832	0.345569	No	No
CPSF1	0.470304	0.0941973	5	Yes	0.674306	0.652497	No	No
CPSF2	0.354513	0.0517287	7	Yes	2.55528	0.0781106	No	No
CPSF3	0.390836	0.0771775	5	Yes	1.42827	0.252207	No	No
CPSF3L	0.416392	0.1234	5	Yes	0.104371	2.21996	No	No
CPSF4	0.452572	0.109716	6	Yes	0.96591	0.461752	No	No
CPT1A	0.450407	0.0207542	5	Yes	7.50028e-05	9.38373	No	Yes
CPT1B	0.454408	0.0848394	5	Yes	2.14564	0.114368	No	No
CPT2	0.404459	0.0705994	7	Yes	1.79686	0.169798	No	No
CPTP	0.495387	0.132793	6	Yes	0.0730609	2.60617	No	No
CPXM1	0.561295	0.0232509	4	Yes	0.411256	0.900446	No	No
CPXM2	0.482435	0.0128732	4	Yes	0.306181	1.25918	No	No
CPZ	0.504361	0.115243	5	Yes	1.82142	0.16752	No	No
CRABP1	0.492543	0.0700025	4	Yes	1.86912	0.145052	No	No
CRABP2	0.600854	0.208775	5	Yes	0.740928	0.626742	No	No
CRADD	0.429481	0.0935038	6	Yes	0.09966	2.31604	No	No
CRAT	0.580794	0.0354286	4	Yes	5.81017e-05	9.56708	No	Yes
CRB3	0.560046	0.0485426	4	Yes	1.22564	0.323044	No	No
CRBN	0.378132	0.0307314	4	Yes	0.35073	1.17152	No	No
CRCP	0.413829	0.0876321	5	Yes	0.248195	1.47272	No	No
CREB1	0.349533	0.0311229	4	Yes	7.05797	0.000807426	Yes	No
CREB3	0.502184	0.0346003	4	Yes	1.6469	0.171914	No	No
CREB3L1	0.511906	0.101812	5	Yes	3.56768	0.0274676	Yes	No
CREB3L2	0.472593	0.0874841	4	Yes	1.8213	0.170197	No	No
CREBBP	0.369468	0.0260648	4	Yes	22.3465	0	Yes	No
CREBL2	0.400376	0.039307	5	Yes	11.1672	1.28001e-05	Yes	No
CREG1	0.411717	0.0540953	6	Yes	0.00188638	6.19432	No	Yes
CRELD1	0.554996	0.00961545	4	Yes	1.04739	0.37828	No	No
CRELD2	0.395731	0.0598788	5	Yes	1.79705	0.167153	No	No
CRH	0.383134	0.108668	6	Yes	19.0914	0	Yes	No
CRHBP	0.349969	0.029376	6	Yes	0.900454	0.492857	No	No
CRIM1	0.426957	0.0869435	6	Yes	56.8951	0	Yes	No
CRIP2	0.547849	0.0950758	4	Yes	0.374678	1.1268	No	No
CRIPT	0.368866	0.0299061	7	Yes	1.38652	0.282441	No	No
CRISPLD1	0.316575	0.0179445	4	Yes	0.512978	0.884255	No	No
CRISPLD2	0.448179	0.0664545	4	Yes	0.020757	3.83223	No	Yes
CRK	0.406549	0.0305262	5	Yes	2.7694	0.0621875	No	No
CRKL	0.425208	0.0435669	5	Yes	0.780768	0.600571	No	No
CRLF3	0.396149	0.0320729	4	Yes	2.80513	0.0597274	No	No
CRLS1	0.361908	0.0245178	4	Yes	2.68187	0.0672438	No	No
CRMP1	0.468187	0.0645616	5	Yes	14.268	5e-07	Yes	No
CRNKL1	0.339433	0.0346974	5	Yes	0.662579	0.697845	No	No
CROT	0.348703	0.0119097	4	Yes	1.9137	0.15097	No	No
CRTAP	0.442153	0.0739592	6	Yes	0.218393	1.60912	No	No
CRTC2	0.515665	0.0250316	4	Yes	41.6433	0	Yes	No
CRX	0.425486	0.0687697	5	Yes	0.0204468	3.85767	No	Yes
CRYAA	0.552586	0.125205	4	Yes	3.49972	0.0280146	Yes	No
CRYAB	0.391888	0.0163527	4	Yes	1.52828	0.224709	No	No
CRYBA1	0.370731	0.0488635	7	Yes	4.38325	0.0101691	Yes	No
CRYBA2	0.520474	0.0995842	5	Yes	0.390518	0.968254	No	No
CRYBA4	0.516635	0.109879	8	Yes	0.0813373	2.42847	No	No
CRYBB1	0.51292	0.135237	6	Yes	0.899372	0.475527	No	No
CRYBB2	0.588732	0.0692471	8	Yes	0.88989	0.473093	No	No
CRYBB3	0.62137	0.0812198	6	Yes	0.966224	0.428663	No	No
CRYGA	0.375766	0.0418114	5	Yes	0.31162	1.12199	No	No
CRYGB	0.297321	0.0598296	7	Yes	3.59569	0.0197803	Yes	No
CRYGC	0.318873	0.0170794	4	Yes	4.47812	0.00447942	Yes	No
CRYGD	0.321122	0.0393278	6	Yes	1.06165	0.307119	No	No
CRYGN	0.534387	0.0634724	4	Yes	1.2657	0.272863	No	No
CRYGS	0.446015	0.10524	7	Yes	0.80627	0.545164	No	No
CRYL1	0.443385	0.0761593	8	Yes	0.814162	0.570891	No	No
CRYM	0.392654	0.0451301	7	Yes	0.795996	0.565981	No	No
CRYZ	0.371087	0.0483986	8	Yes	0.0129942	4.28021	No	Yes
CRYZL1	0.348273	0.0271904	4	Yes	3.05778	0.0439618	Yes	No
CS	0.417111	0.0268406	6	Yes	14.7583	3e-07	Yes	No
CSDC2	0.603422	0.040013	4	Yes	0	0	No	No
CSDE1	0.36109	0.020608	5	Yes	62.0656	0	Yes	No
CSE1L	0.377901	0.0302487	6	Yes	6.23539	0.00172499	Yes	No
CSF1R	0.493513	0.0690542	5	Yes	0.881735	0.517343	No	No
CSF2	0.489561	0.173402	5	Yes	0.225617	1.46466	No	No
CSGALNACT2	0.34581	0.0184759	4	Yes	2.29817	0.101652	No	No
CSK	0.494566	0.105177	5	Yes	5.24928	0.00480271	Yes	No
CSNK1A1	0.383474	0.0437189	5	Yes	35.6662	0	Yes	No
CSNK1G1	0.462747	0.0323096	5	Yes	0.37426	1.14816	No	No
CSNK1G3	0.360073	0.022377	5	Yes	81.2056	0	Yes	No
CSNK2A1	0.464403	0.0557484	5	Yes	12.5027	3.30001e-06	Yes	No
CSNK2B	0.43476	0.10548	4	Yes	1.30811	0.299603	No	No
CSPG4	0.563724	0.0244272	4	Yes	0.927101	0.46639	No	No
CSRNP1	0.511596	0.0228699	5	Yes	0.645713	0.713594	No	No
CSRNP2	0.453391	0.0233593	4	Yes	0.0338819	3.34684	No	Yes
CSRP1	0.559224	0.116651	6	Yes	0.00153688	6.37331	No	Yes
CSRP2	0.385319	0.0969047	6	Yes	0.451532	0.954302	No	No
CSRP2BP	0.441991	0.0918059	4	Yes	2.99198	0.0487953	No	No
CSRP3	0.42808	0.053634	5	Yes	1.16971	0.349934	No	No
CST3	0.444609	0.109289	5	Yes	0.722015	0.636103	No	No
CST7	0.457614	0.0582985	5	Yes	1.34521	0.283565	No	No
CSTA	0.361247	0.0255577	4	Yes	1.23903	0.29144	No	No
CSTB	0.408561	0.0368804	5	Yes	0.252951	1.42627	No	No
CSTF1	0.448097	0.0782408	5	Yes	0.315464	1.27947	No	No
CSTF2T	0.365801	0.0318957	5	Yes	2.68004e-05	10.3473	No	Yes
CSTF3	0.354983	0.0494741	6	Yes	8.30187	0.000220024	Yes	No
CTBP1	0.413683	0.0667361	5	Yes	26.3626	0	Yes	No
CTBS	0.269308	0.0372142	5	Yes	2.21637	0.110587	No	No
CTCF	0.375132	0.0251747	6	Yes	63.9062	0	Yes	No
CTDP1	0.435919	0.110767	4	Yes	2.00146	0.135206	No	No
CTDSP1	0.57655	0.044113	4	Yes	0.052578	2.87194	No	No
CTDSP2	0.457855	0.0691626	4	Yes	5.34047	0.0045646	Yes	No
CTDSPL	0.581987	0.190429	4	Yes	0.265734	1.42376	No	No
CTDSPL2	0.36204	0.0316179	6	Yes	116.166	0	Yes	No
CTGF	0.381864	0.0193681	6	Yes	37.4682	0	Yes	No
CTH	0.326852	0.0274623	5	Yes	3.33238	0.0331193	Yes	No
CTLA4	0.379674	0.0520037	4	Yes	1.9673	0.139698	No	No
CTNNA1	0.386115	0.0283238	5	Yes	0.645797	0.712371	No	No
CTNNA2	0.38062	0.0146676	5	Yes	26.9365	0	Yes	No
CTNNAL1	0.39817	0.0332433	4	Yes	1.65297	0.20194	No	No
CTNNBIP1	0.460885	0.0810769	6	Yes	2.74473	0.0637205	No	No
CTNNBL1	0.454659	0.0679254	6	Yes	0.775015	0.593096	No	No
CTNS	0.433981	0.114924	5	Yes	0.114284	2.19022	No	No
CTR9	0.397966	0.0595434	6	Yes	1.0306	0.42007	No	No
CTRC	0.520419	0.053515	6	Yes	0.463906	0.891563	No	No
CTRL	0.41828	0.125922	5	Yes	1.00372	0.426339	No	No
CTSA	0.501409	0.0886972	6	Yes	0.661576	0.694747	No	No
CTSB	0.479203	0.0296038	6	Yes	6.2602e-05	9.60557	No	Yes
CTSC	0.363852	0.0266499	6	Yes	2.49057	0.0826511	No	No
CTSD	0.562531	0.126906	8	Yes	0.0186469	3.91821	No	Yes
CTSF	0.554046	0.0188916	4	Yes	2.44502	0.075101	No	No
CTSG	0.379994	0.0328459	4	Yes	0.611787	0.699448	No	No
CTSH	0.428564	0.11604	5	Yes	0.593145	0.760629	No	No
CTSK	0.489305	0.0756782	6	Yes	0.520749	0.8492	No	No
CTSL	0.340266	0.0399197	4	Yes	1.81264	0.170337	No	No
CTSS	0.37308	0.0876318	5	Yes	1.79405	0.169189	No	No
CTSW	0.511329	0.109537	4	Yes	0.414522	1.00975	No	No
CTSZ	0.517025	0.0787833	6	Yes	0.000153212	8.61758	No	Yes
CTTNBP2	0.290918	0.0158723	5	Yes	10.3898	2.50003e-05	Yes	No
CTTNBP2NL	0.379883	0.0240781	4	Yes	15.0155	2e-07	Yes	No
CTU1	0.516974	0.088982	6	Yes	1e-07	16.1632	No	Yes
CTU2	0.401918	0.136843	5	Yes	0.668312	0.696624	No	No
CTXN1	0.602051	0.165477	5	Yes	0.211751	1.60046	No	No
CTXN2	0.398336	0.0447902	4	Yes	0.80065	0.564287	No	No
CTXN3	0.353115	0.0285392	6	Yes	0.217422	1.5902	No	No
CUBN	0.43082	0.0230303	5	Yes	5e-07	14.2597	No	Yes
CUEDC2	0.473238	0.103653	5	Yes	2.84356	0.0568724	No	No
CUL1	0.475448	0.0662212	4	Yes	16.185	1e-07	Yes	No
CUL2	0.395206	0.00851197	4	Yes	10.873	1.50001e-05	Yes	No
CUL3	0.345092	0.0100027	4	Yes	11.9422	5.70002e-06	Yes	No
CUL9	0.547648	0.044415	4	Yes	0.764426	0.572947	No	No
CUTC	0.412482	0.0357588	5	Yes	3.2874	0.0344148	Yes	No
CWC15	0.345121	0.0497133	7	Yes	0.445626	0.986019	No	No
CWC25	0.425702	0.0347614	5	Yes	0.0052776	5.1817	No	Yes
CWC27	0.367413	0.0412858	4	Yes	2.13122	0.11378	No	No
CWF19L1	0.389212	0.047907	5	Yes	0.102849	2.28064	No	No
CWF19L2	0.364573	0.039211	5	Yes	1.18478	0.356495	No	No
CX3CL1	0.555269	0.0586042	4	Yes	1.33539	0.29075	No	No
CX3CR1	0.468276	0.0174899	5	Yes	0	0	No	No
CXCL10	0.401532	0.0359321	4	Yes	0.00142902	6.32686	No	Yes
CXCL13	0.36339	0.0250585	4	Yes	0.046482	2.94676	No	No
CXCL14	0.426034	0.0583393	7	Yes	6.73152	0.00111532	Yes	No
CXCL8	0.307293	0.0265603	4	Yes	0.000150411	8.54506	No	Yes
CXCL9	0.474134	0.0980699	4	Yes	0	0	No	No
CXCR1	0.503565	0.0527936	4	Yes	0.000994494	6.78662	No	Yes
CXCR4	0.33511	0.0516076	6	Yes	5.01791	0.00603014	Yes	No
CXXC1	0.532433	0.055772	4	Yes	1.63001e-05	10.5196	No	Yes
CXXC5	0.459924	0.00512942	4	Yes	94.0641	0	Yes	No
CYB561	0.503545	0.0430697	5	Yes	0.0172331	4.01051	No	Yes
CYB561D2	0.447952	0.100293	6	Yes	1.27682	0.311672	No	No
CYB5A	0.386811	0.0304139	6	Yes	3.14926	0.0410619	Yes	No
CYB5B	0.427841	0.0245532	7	Yes	0.182472	1.76638	No	No
CYB5D1	0.453865	0.0425306	5	Yes	1.26883	0.320637	No	No
CYB5D2	0.402316	0.0838077	4	Yes	0.491159	0.919737	No	No
CYB5R1	0.467027	0.0640186	7	Yes	0.0176776	3.94829	No	Yes
CYB5R3	0.544037	0.111056	7	Yes	0.196362	1.69388	No	No
CYB5R4	0.330197	0.042783	7	Yes	8.88197	0.000122307	Yes	No
CYBA	0.491887	0.165566	5	Yes	1.00447	0.428679	No	No
CYBB	0.353138	0.0438583	5	Yes	1.33362	0.297834	No	No
CYBRD1	0.397945	0.049094	6	Yes	0.000654714	7.27909	No	Yes
CYC1	0.516517	0.0685335	6	Yes	0.903756	0.482015	No	No
CYCS	0.347914	0.0389461	6	Yes	0.0287004	3.52775	No	Yes
CYCT	0.281803	0.0568292	4	Yes	1.25863	0.317048	No	No
CYFIP2	0.456268	0.0213091	5	Yes	0.361443	1.17069	No	No
CYGB	0.592023	0.0771105	7	Yes	0.0272392	3.55766	No	Yes
CYP11A1	0.500506	0.111946	5	Yes	0.985486	0.439817	No	No
CYP11B1	0.532293	0.0770541	4	Yes	0	0	No	No
CYP17A1	0.467001	0.0795741	7	Yes	1.5822	0.219237	No	No
CYP19A1	0.401204	0.0510505	5	Yes	0.547997	0.844929	No	No
CYP1A2	0.485602	0.105432	5	Yes	0.253621	1.4492	No	No
CYP1B1	0.39308	0.0551312	5	Yes	0.000187418	8.44765	No	Yes
CYP20A1	0.357176	0.0585373	5	Yes	1.33519	0.300552	No	No
CYP26A1	0.285531	0.0342623	5	Yes	4.25908	0.0126637	Yes	No
CYP26B1	0.50172	0.183439	4	Yes	7.66081	0.000443999	Yes	No
CYP27A1	0.487669	0.0278777	5	Yes	0.0033495	5.34482	No	Yes
CYP27B1	0.445423	0.051453	6	Yes	0.911532	0.495275	No	No
CYP2C18	0.394768	0.0277575	4	Yes	0.00165807	6.25419	No	Yes
CYP2E1	0.383243	0.0677073	6	Yes	0.00384428	5.40083	No	Yes
CYP2R1	0.375081	0.0535467	5	Yes	1.11986	0.374368	No	No
CYP2S1	0.543684	0.0257098	4	Yes	0	0	No	No
CYP2U1	0.402066	0.0427017	5	Yes	1.09359	0.398523	No	No
CYP39A1	0.37985	0.0261844	4	Yes	0.0242015	3.66481	No	Yes
CYP46A1	0.579166	0.0786632	5	Yes	2.06514	0.126858	No	No
CYP4B1	0.438246	0.0797183	5	Yes	0.468911	0.931674	No	No
CYP4V2	0.343551	0.029931	5	Yes	0.230554	1.55063	No	No
CYP7A1	0.322547	0.029596	7	Yes	0.00136032	6.5346	No	Yes
CYP8B1	0.459858	0.0781347	5	Yes	0.510289	0.89502	No	No
CYR61	0.387577	0.0366782	6	Yes	24.2427	0	Yes	No
CYSRT1	0.607639	0.0702638	4	Yes	0.00091622	6.59826	No	Yes
CYSTM1	0.407947	0.0795619	5	Yes	2.45586	0.0793064	No	No
CYTH2	0.417523	0.243623	4	Yes	2.89763	0.046289	No	No
CYTH4	0.568282	0.0524644	5	Yes	0	18.1717	No	Yes
CYTIP	0.35958	0.0275452	4	Yes	0.315037	1.27103	No	No
CYYR1	0.409984	0.0401688	5	Yes	0.376482	1.14249	No	No
DAAM1	0.390967	0.0333672	4	Yes	22.5949	0	Yes	No
DAG1	0.45822	0.0513755	5	Yes	40.4846	0	Yes	No
DAGLB	0.475997	0.0394263	4	Yes	0.0004464	7.61521	No	Yes
DALRD3	0.427057	0.0517853	4	Yes	0.752656	0.605399	No	No
DAP	0.44903	0.0673703	7	Yes	0.168254	1.83449	No	No
DAP3	0.463588	0.0902036	4	Yes	0.364461	1.12395	No	No
DAPK1	0.49339	0.0971384	4	Yes	6.20896	0.001673	Yes	No
DAPK2	0.454502	0.0696523	4	Yes	1.73678	0.183587	No	No
DAPK3	0.5867	0.127126	5	Yes	0.000156912	8.63891	No	Yes
DAPL1	0.406811	0.0589338	5	Yes	1.91854	0.136277	No	No
DAPP1	0.385884	0.0461375	5	Yes	0.0563666	2.8616	No	No
DARS	0.324333	0.06677	4	Yes	4.18173	0.0135539	Yes	No
DARS2	0.348184	0.0280295	4	Yes	0.00505837	5.1217	No	Yes
DAW1	0.378497	0.0325616	6	Yes	1.16077	0.352004	No	No
DAZAP1	0.433675	0.058281	4	Yes	12.486	3.20001e-06	Yes	No
DAZAP2	0.395171	0.0315875	5	Yes	28.4722	0	Yes	No
DAZL	0.314701	0.00888441	4	Yes	10.5208	2.41003e-05	Yes	No
DBH	0.5838	0.0493816	6	Yes	0.000173515	8.52333	No	Yes
DBR1	0.320205	0.0610417	8	Yes	3.22406	0.03814	Yes	No
DBT	0.353536	0.0256958	7	Yes	0.71884	0.659121	No	No
DBX2	0.381874	0.0256479	4	Yes	5.33317	0.0043613	Yes	No
DCAF11	0.471259	0.0767981	5	Yes	1.69049	0.194876	No	No
DCAF12	0.421622	0.0156273	4	Yes	6.56517	0.00129464	Yes	No
DCAF13	0.346349	0.0533169	6	Yes	3.1912	0.0386523	Yes	No
DCAF15	0.62154	0.0197158	4	Yes	0.277382	1.29991	No	No
DCAF5	0.407636	0.0666434	4	Yes	1.25921	0.323122	No	No
DCAF6	0.318069	0.0403626	4	Yes	10.2406	2.75004e-05	Yes	No
DCAF7	0.470577	0.0766387	6	Yes	0.120819	2.14968	No	No
DCAF8	0.483303	0.0172309	4	Yes	0.884721	0.519676	No	No
DCAKD	0.503503	0.103025	6	Yes	0.00869983	4.67354	No	Yes
DCBLD1	0.365654	0.053795	4	Yes	1.39952	0.271654	No	No
DCBLD2	0.405108	0.0494648	6	Yes	1.04247	0.425982	No	No
DCK	0.321433	0.0377919	7	Yes	9e-07	13.7631	No	Yes
DCLRE1A	0.399382	0.0654514	4	Yes	1.53766	0.225128	No	No
DCLRE1C	0.370047	0.0147969	4	Yes	1.69484	0.19178	No	No
DCN	0.322457	0.0248119	6	Yes	7.14477	0.000725363	Yes	No
DCP2	0.405348	0.0342547	6	Yes	1.12877	0.38446	No	No
DCPS	0.421126	0.0483911	5	Yes	0.851924	0.539826	No	No
DCT	0.389563	0.0958243	6	Yes	1.06774	0.40583	No	No
DCTD	0.399806	0.0830917	5	Yes	3.74773	0.0223035	Yes	No
DCTN2	0.484925	0.070135	5	Yes	4.55343	0.00955702	Yes	No
DCTN3	0.472113	0.0717538	5	Yes	1.1912	0.339013	No	No
DCTN4	0.413355	0.0345628	4	Yes	1.65459	0.203959	No	No
DCTN5	0.422327	0.0421791	5	Yes	0.00897828	4.64033	No	Yes
DCTN6	0.34893	0.0953546	6	Yes	1.12035	0.368565	No	No
DCTPP1	0.419205	0.0623836	6	Yes	2.07031	0.126694	No	No
DCUN1D1	0.355599	0.0262763	5	Yes	22.9633	0	Yes	No
DCUN1D3	0.423189	0.0195178	5	Yes	2.853	0.0572718	No	No
DCUN1D5	0.362225	0.018156	6	Yes	11.4013	8.80004e-06	Yes	No
DCXR	0.45019	0.0990678	6	Yes	2.04005	0.131146	No	No
DDA1	0.504345	0.0696027	6	Yes	0.677341	0.696604	No	No
DDAH1	0.436248	0.0319921	4	Yes	0.21479	1.60656	No	No
DDAH2	0.434693	0.0915291	4	Yes	1.64978	0.192998	No	No
DDB1	0.514875	0.0098446	4	Yes	26.6056	0	Yes	No
DDB2	0.438657	0.0986156	7	Yes	0.444802	0.997876	No	No
DDI1	0.397901	0.0150719	5	Yes	0.10373	2.21336	No	No
DDIT3	0.418285	0.0462983	4	Yes	1.20738	0.332373	No	No
DDIT4	0.461221	0.0822487	7	Yes	8.20704	0.000240929	Yes	No
DDIT4L	0.38691	0.0268282	4	Yes	0	0	No	No
DDN	0.529551	0.00546621	4	Yes	15.7658	1e-07	Yes	No
DDOST	0.457837	0.0559342	8	Yes	0.0170499	3.99316	No	Yes
DDR2	0.465981	0.0727707	4	Yes	1.76965	0.181651	No	No
DDRGK1	0.490779	0.0466248	6	Yes	0.356233	1.13253	No	No
DDT	0.454159	0.0903203	6	Yes	0.803311	0.566294	No	No
DDX1	0.351196	0.0473165	7	Yes	2.16198	0.106954	No	No
DDX10	0.3746	0.0360865	6	Yes	0.942955	0.474279	No	No
DDX18	0.422838	0.0713397	5	Yes	0.929664	0.48587	No	No
DDX20	0.368104	0.0471098	5	Yes	1.0166	0.424177	No	No
DDX21	0.393354	0.052123	5	Yes	0.000613688	7.31963	No	Yes
DDX23	0.500055	0.093766	7	Yes	0.189635	1.70239	No	No
DDX25	0.352397	0.0569386	5	Yes	1.50587	0.235137	No	No
DDX27	0.396064	0.0385486	6	Yes	0.128526	2.01706	No	No
DDX28	0.408742	0.0968302	5	Yes	0.0274812	3.46726	No	Yes
DDX39A	0.53016	0.127094	4	Yes	1.50428	0.218097	No	No
DDX39B	0.432745	0.0735079	4	Yes	1.87927	0.15347	No	No
DDX3X	0.369265	0.0148984	5	Yes	209.179	0	Yes	No
DDX4	0.335772	0.0286564	5	Yes	4.15994	0.0142888	Yes	No
DDX42	0.396285	0.0291326	5	Yes	9.16898	9.30043e-05	Yes	No
DDX46	0.371041	0.0394865	4	Yes	0.731608	0.637938	No	No
DDX47	0.472329	0.0381708	4	Yes	0.154616	1.87695	No	No
DDX49	0.503279	0.133087	6	Yes	0.435147	1.01631	No	No
DDX5	0.345396	0.0293343	6	Yes	20.6593	0	Yes	No
DDX50	0.308853	0.00972205	5	Yes	55.8088	0	Yes	No
DDX51	0.447873	0.0645057	4	Yes	0	0	No	No
DDX52	0.382615	0.0432348	6	Yes	2.23328	0.107949	No	No
DDX55	0.374214	0.0471927	6	Yes	0.231427	1.53169	No	No
DDX56	0.508092	0.0695604	4	Yes	0.126452	2.08261	No	No
DECR1	0.327598	0.041561	6	Yes	0.637346	0.732346	No	No
DEDD	0.447808	0.0363565	4	Yes	2.17484	0.113082	No	No
DEF8	0.476971	0.10463	4	Yes	0.0672853	2.68385	No	No
DEFB1	0.410457	0.122058	6	Yes	0.0212275	3.68506	No	Yes
DEGS1	0.396916	0.0356958	6	Yes	0.666416	0.694745	No	No
DEGS2	0.543609	0.133569	4	Yes	0.285681	1.3487	No	No
DEK	0.331883	0.0139315	6	Yes	10.5861	2.28003e-05	Yes	No
DENND2C	0.478345	0.0964484	4	Yes	0.109396	2.21191	No	No
DENND2D	0.427402	0.0546462	4	Yes	1.08354	0.394307	No	No
DENND6B	0.55027	0.116752	5	Yes	1.27336	0.318044	No	No
DENR	0.388576	0.0244984	6	Yes	0.350118	1.19473	No	No
DEPDC1B	0.38296	0.0701779	5	Yes	0.329919	1.22845	No	No
DEPDC7	0.259772	0.0202978	6	Yes	1.08808	0.369667	No	No
DERA	0.349033	0.0451683	4	Yes	2.07809	0.124417	No	No
DERL1	0.430585	0.0444957	7	Yes	1.72543	0.190374	No	No
DERL2	0.417232	0.0306781	4	Yes	6.87069	0.000870379	Yes	No
DERL3	0.525715	0.129354	4	Yes	1.35876	0.280616	No	No
DES	0.594422	0.0387174	5	Yes	1.63866	0.198592	No	No
DESI1	0.467506	0.0387169	5	Yes	0.322763	1.26118	No	No
DESI2	0.404923	0.028714	6	Yes	5.95637	0.0024518	Yes	No
DET1	0.424882	0.0786762	5	Yes	0.0140119	4.14699	No	Yes
DFFA	0.414577	0.0814452	4	Yes	0.0773244	2.55465	No	No
DFFB	0.435289	0.0626037	5	Yes	0.0720977	2.60695	No	No
DFNA5	0.416278	0.0235902	4	Yes	0.196569	1.66538	No	No
DGAT1	0.612194	0.0298466	4	Yes	0.0514728	2.89623	No	No
DGAT2	0.473679	0.0594926	4	Yes	2.37772	0.0912804	No	No
DGAT2L6	0.43562	0.0203537	4	Yes	1.4e-06	13.0698	No	Yes
DGCR14	0.437254	0.171003	4	Yes	0.449057	0.986319	No	No
DGCR6	0.515209	0.103688	4	Yes	0.447203	0.972438	No	No
DGCR8	0.48078	0.0892848	5	Yes	0.183776	1.74637	No	No
DGKB	0.350567	0.0114929	4	Yes	4.32933	0.0125518	Yes	No
DGKQ	0.56189	0.0919817	4	Yes	0	0	No	No
DGUOK	0.380023	0.0648188	4	Yes	1.64295	0.192995	No	No
DHCR24	0.461775	0.0996753	6	Yes	0.397502	1.09482	No	No
DHCR7	0.471803	0.0706135	5	Yes	0.00319189	5.6531	No	Yes
DHDDS	0.436316	0.0547786	5	Yes	0.714219	0.654378	No	No
DHFR	0.370999	0.0416807	6	Yes	0.760308	0.619171	No	No
DHH	0.428448	0.0911404	5	Yes	0.0330648	3.38774	No	Yes
DHODH	0.443553	0.0735554	7	Yes	0.0825378	2.48653	No	No
DHPS	0.460444	0.0874522	5	Yes	1.90183	0.148613	No	No
DHRS1	0.443869	0.0770116	5	Yes	0.799801	0.55416	No	No
DHRS11	0.470902	0.0924236	6	Yes	0.530017	0.858655	No	No
DHRS13	0.500165	0.0602842	5	Yes	1.02824	0.423244	No	No
DHRS3	0.48358	0.0765589	5	Yes	2.53236	0.0796963	No	No
DHRS4	0.448507	0.0938997	7	Yes	0.409822	1.04857	No	No
DHRS7	0.343966	0.0568198	6	Yes	0.237634	1.50466	No	No
DHRS7B	0.440535	0.124517	6	Yes	0.0605792	2.76431	No	No
DHRS7C	0.420324	0.12109	4	Yes	0.939875	0.426876	No	No
DHRS9	0.400654	0.0682526	5	Yes	1.01277	0.436541	No	No
DHTKD1	0.411832	0.023911	4	Yes	0	0	No	No
DHX15	0.338368	0.0311466	7	Yes	62.8315	0	Yes	No
DHX16	0.345868	0.0282945	4	Yes	0.761156	0.57083	No	No
DHX34	0.459689	0.164487	4	Yes	0.678715	0.672714	No	No
DHX37	0.528022	0.0718003	5	Yes	7e-07	13.9334	No	Yes
DHX38	0.488046	0.074492	7	Yes	0.058028	2.78755	No	No
DHX40	0.365496	0.0177464	4	Yes	18.415	0	Yes	No
DHX58	0.488143	0.0397107	4	Yes	0.014457	4.01095	No	Yes
DHX9	0.316736	0.0363337	6	Yes	0.911331	0.488255	No	No
DIABLO	0.586804	0.212558	5	Yes	0.519688	0.870725	No	No
DICER1	0.338846	0.0802324	5	Yes	4.22707	0.0141136	Yes	No
DIEXF	0.420054	0.052314	7	Yes	0.000552252	7.45725	No	Yes
DIMT1	0.315431	0.0493067	5	Yes	0.622625	0.743011	No	No
DIO1	0.421918	0.0273553	5	Yes	6.65022e-05	9.45679	No	Yes
DIO2	0.36059	0.0688929	6	Yes	5.38706	0.00441232	Yes	No
DIO3	0.54532	0.053522	8	Yes	1.58792	0.217025	No	No
DIP2C	0.374084	0.0349599	4	Yes	16.1593	1e-07	Yes	No
DIRAS1	0.537718	0.0967167	4	Yes	0.00973584	4.57316	No	Yes
DIRAS2	0.466705	0.0470846	5	Yes	0.00220222	6.01134	No	Yes
DIRAS3	0.351397	0.0175522	4	Yes	0.927239	0.471533	No	No
DIRC2	0.415932	0.0410717	5	Yes	0.900837	0.508082	No	No
DIS3L	0.371773	0.0135457	4	Yes	2.34712	0.09166	No	No
DISP1	0.398153	0.0705986	4	Yes	0.734498	0.592059	No	No
DISP2	0.459831	0.103546	4	Yes	0.286616	1.35915	No	No
DKC1	0.473917	0.106098	6	Yes	0.00193126	6.1584	No	Yes
DKK1	0.37673	0.0681954	5	Yes	1.62322	0.208153	No	No
DKK2	0.386411	0.0453336	5	Yes	1.17462	0.357777	No	No
DKK3	0.459561	0.0441608	6	Yes	0.425255	1.04156	No	No
DLAT	0.267498	0.13581	5	Yes	2.68023	0.0672261	No	No
DLD	0.333889	0.0287117	5	Yes	2.19759	0.110425	No	No
DLG1	0.380502	0.0668753	4	Yes	1.70309	0.188798	No	No
DLGAP4	0.430292	0.0825973	4	Yes	1.69891	0.192083	No	No
DLGAP5	0.336506	0.0552897	5	Yes	0.513463	0.864783	No	No
DLL4	0.507923	0.0553718	5	Yes	13.2793	1.4e-06	Yes	No
DLST	0.469244	0.0452396	6	Yes	1.89643	0.155612	No	No
DLX1	0.438339	0.0824824	6	Yes	4.5727	0.00972524	Yes	No
DLX3	0.534489	0.0334189	5	Yes	4.76072	0.00783179	Yes	No
DLX5	0.342906	0.019881	5	Yes	47.617	0	Yes	No
DMAP1	0.501018	0.0656684	6	Yes	1.43908	0.252054	No	No
DMP1	0.417434	0.0840537	5	Yes	0.0572316	2.82907	No	No
DMRT1	0.472634	0.0838186	5	Yes	0.461515	0.95199	No	No
DMRT2	0.311586	0.0444042	4	Yes	4.03236	0.014731	Yes	No
DMRT3	0.474247	0.0821845	4	Yes	1.91739	0.146661	No	No
DMRTA1	0.298079	0.0493517	4	Yes	0.680004	0.686228	No	No
DMRTA2	0.455265	0.0850172	6	Yes	5.56749	0.00349781	Yes	No
DMRTC2	0.389562	0.0196916	4	Yes	10.0997	2.83004e-05	Yes	No
DMTF1	0.389145	0.0346052	4	Yes	3.23203	0.0375728	Yes	No
DNAAF1	0.514529	0.162304	4	Yes	0.266718	1.39832	No	No
DNAAF2	0.356179	0.044877	4	Yes	3.47006e-05	10.0955	No	Yes
DNAJA1	0.350459	0.03081	6	Yes	4.45915	0.0107725	Yes	No
DNAJA2	0.355422	0.0236304	7	Yes	26.81	0	Yes	No
DNAJB11	0.337011	0.0646473	4	Yes	4.65956	0.00831568	Yes	No
DNAJB13	0.513782	0.0810115	6	Yes	0.544814	0.841921	No	No
DNAJB14	0.333168	0.047474	6	Yes	5.15243	0.00548391	Yes	No
DNAJB2	0.504992	0.0793891	5	Yes	3.45192	0.0299702	Yes	No
DNAJB3	0.394728	0.00324705	4	Yes	1.63381	0.191434	No	No
DNAJB4	0.311101	0.0280774	5	Yes	6.18591	0.00189009	Yes	No
DNAJB6	0.414302	0.0783139	5	Yes	0.0784295	2.53006	No	No
DNAJB7	0.323842	0.0404166	4	Yes	0.826806	0.538118	No	No
DNAJB9	0.318348	0.0243347	7	Yes	7.76805	0.000390576	Yes	No
DNAJC10	0.379903	0.0458157	5	Yes	0.130036	2.05687	No	No
DNAJC11	0.519234	0.0588132	5	Yes	0.00994266	4.53558	No	Yes
DNAJC12	0.328629	0.0397263	4	Yes	3.08935	0.0432886	Yes	No
DNAJC14	0.42802	0.018376	4	Yes	4.18598	0.013658	Yes	No
DNAJC15	0.418517	0.0599752	6	Yes	2.09854	0.125579	No	No
DNAJC16	0.495492	0.0416363	4	Yes	0.849511	0.540309	No	No
DNAJC17	0.416973	0.0420737	7	Yes	1.3288	0.283332	No	No
DNAJC18	0.424611	0.0335796	7	Yes	1.14001e-05	11.3217	No	Yes
DNAJC19	0.29794	0.0439907	5	Yes	1.12871	0.377569	No	No
DNAJC2	0.299897	0.0772592	7	Yes	2.5858	0.0687236	No	No
DNAJC21	0.295754	0.0404146	4	Yes	8.72608	0.000127808	Yes	No
DNAJC22	0.441117	0.0852386	5	Yes	0.0626693	2.68616	No	No
DNAJC24	0.375394	0.052325	7	Yes	0.175004	1.80001	No	No
DNAJC25	0.324525	0.0917135	8	Yes	8.01772	0.000295644	Yes	No
DNAJC27	0.461986	0.0315727	6	Yes	5.33014e-05	9.77541	No	Yes
DNAJC3	0.406164	0.0331732	5	Yes	0.0853606	2.46783	No	No
DNAJC30	0.502553	0.0285573	5	Yes	0.0190669	3.85324	No	Yes
DNAJC4	0.495636	0.0803691	4	Yes	1.10173	0.364321	No	No
DNAJC7	0.496319	0.0333923	5	Yes	1.61487	0.215554	No	No
DNAJC8	0.448303	0.0349713	6	Yes	2.17411	0.113624	No	No
DNAJC9	0.392392	0.0388104	7	Yes	0.867685	0.528024	No	No
DNAL1	0.34604	0.0636287	7	Yes	2.67812	0.0693204	No	No
DNAL4	0.528482	0.0765665	7	Yes	0.509232	0.886382	No	No
DNALI1	0.431564	0.100067	6	Yes	0.00303289	5.72959	No	Yes
DNASE1	0.477375	0.0900347	7	Yes	0.0108262	4.39071	No	Yes
DNASE1L3	0.447828	0.0659874	5	Yes	0.41827	1.05181	No	No
DNASE2	0.414413	0.0582624	5	Yes	1.37376	0.277081	No	No
DNASE2B	0.417799	0.0587109	5	Yes	0.345492	1.18602	No	No
DND1	0.437479	0.101763	5	Yes	2.24706	0.103185	No	No
DNM1L	0.391163	0.044525	4	Yes	5.50783	0.00361001	Yes	No
DNM2	0.595089	0.0654101	4	Yes	0.0866627	2.41305	No	No
DNPEP	0.458787	0.0420851	5	Yes	1.30958	0.28406	No	No
DNPH1	0.366922	0.0804378	4	Yes	0.392846	1.06989	No	No
DNTT	0.39266	0.0265899	4	Yes	0.562551	0.788842	No	No
DNTTIP1	0.481823	0.0452368	6	Yes	2.84777	0.056056	No	No
DNTTIP2	0.295103	0.0377845	4	Yes	1.26122	0.306427	No	No
DOCK11	0.340841	0.0263344	5	Yes	3.84559	0.0206258	Yes	No
DOHH	0.511522	0.175393	7	Yes	7.90003e-06	11.5733	No	Yes
DOK4	0.518817	0.0532823	6	Yes	5.50854	0.00368669	Yes	No
DOK6	0.377315	0.0179608	4	Yes	1.57585	0.226826	No	No
DOLK	0.444475	0.0626203	6	Yes	1.77451	0.162668	No	No
DOLPP1	0.487367	0.0614806	5	Yes	2.77429	0.0611424	No	No
DONSON	0.347398	0.0186818	5	Yes	0.0063784	4.9388	No	Yes
DPAGT1	0.456159	0.0730576	6	Yes	1.63367	0.201921	No	No
DPCD	0.432897	0.110448	5	Yes	0.0613179	2.75401	No	No
DPEP1	0.485968	0.143226	5	Yes	0.490221	0.907475	No	No
DPF2	0.4768	0.0744285	5	Yes	3.55335	0.028128	Yes	No
DPF3	0.444518	0.0372253	4	Yes	1.7784	0.177626	No	No
DPH2	0.461422	0.0796058	5	Yes	0.0770353	2.53918	No	No
DPH3	0.387725	0.0483654	5	Yes	1.72089	0.191337	No	No
DPH5	0.393524	0.0323135	6	Yes	0.00135932	6.51423	No	Yes
DPH6	0.359404	0.0367103	6	Yes	1.06001e-05	11.3523	No	Yes
DPM1	0.348341	0.0248424	4	Yes	2.04658	0.131822	No	No
DPM2	0.525654	0.094024	8	Yes	0.119587	2.12623	No	No
DPM3	0.389997	0.0694231	4	Yes	1.05122	0.405348	No	No
DPP10	0.392324	0.0600658	4	Yes	15.3894	2e-07	Yes	No
DPP3	0.479465	0.0429597	4	Yes	2.44495	0.0824035	No	No
DPP4	0.355176	0.03807	6	Yes	4.14319	0.0152059	Yes	No
[truncated: 6,707 more rows]

## Sheet: README
Vertebrate 3′ UTRs were aligned with Clustal Omega for 9 vertebrate species (Bos taurus, Canis familiaris, Danio rerio, Gallus gallus, Homo sapiens, Macaca mulatta, Mus musculus, Rattus norvegicus, Xenopus tropicalis) and scored for evidence of strict conservation or rapid evolution using the phyloP program. The indicated columns denote the p-value for the presence of strict conservation or rapid…
