# Supplementary material for: A massively parallel 3′ UTR reporter assay reveals relationships between nucleotide content, sequence conservation, and mRNA destabilization
Source: HighWire-hosted journal article supplement (doi:10.1101/gr.242552.118), 2019-05-31
Supplement: Supplemental_Table_3.xlsx [file Supplemental_Table_3.xlsx]

## Sheet: Annotation
Input ID	Gene ID	Type	Tax ID	Homologene Gene ID	Homologene Gene Tax ID	Gene Symbol	Description	Biological Process (GO)	Kinase Class (UniProt)	Protein Function (Protein Atlas)	Subcellular Location (Protein Atlas)	Drug (DrugBank)	Canonical Pathways	Hallmark Gene Sets	GO:0044712 single-organism catabolic proc	GO:0019752 carboxylic acid metabolic proc	ko04142 Lysosome	GO:0034660 ncRNA metabolic process	GO:0034097 response to cytokine	GO:0001775 cell activation	GO:0005975 carbohydrate metabolic process	GO:1901565 organonitrogen compound catabo	R-HSA-6798695 Neutrophil degranulation	GO:0006954 inflammatory response	hsa00230 Purine metabolism	GO:0055114 oxidation-reduction process	ko04610 Complement and coagulation cas	GO:0002526 acute inflammatory response	GO:1904659 glucose transmembrane transpor	GO:0071706 tumor necrosis factor superfam	GO:0009607 response to biotic stimulus	GO:0098771 inorganic ion homeostasis	GO:0006753 nucleoside phosphate metabolic	GO:1901137 carbohydrate derivative biosyn
A1BG	1	symbol	H. sapiens	1	H. sapiens	A1BG	alpha-1-B glycoprotein	GO:0002576 platelet degranulation;GO:0045055 regulated exocytosis;GO:0006887 exocytosis					(M14532)ST PHOSPHOINOSITIDE 3 KINASE PATHWAY		0	0	0	0	0	0	0	0	1	0	0	0	0	0	0	0	0	0	0	0
AARS2	57505	symbol	H. sapiens	57505	H. sapiens	AARS2	alanyl-tRNA synthetase 2, mitochondrial	GO:0070143 mitochondrial alanyl-tRNA aminoacylation;GO:0006419 alanyl-tRNA aminoacylation;GO:0070127 tRNA aminoacylation for mitochondrial protein translation		Enzymes/ENZYME proteins/Ligase	Mitochondria	L-Alanine (Trna binding)			0	1	0	1	0	0	0	0	0	0	0	0	0	0	0	0	0	0	0	0
ABCA4	24	symbol	H. sapiens	24	H. sapiens	ABCA4	ATP binding cassette subfamily A member 4	GO:0006649 phospholipid transfer to membrane;GO:0007603 phototransduction, visible light;GO:0045332 phospholipid translocation		Transporters/Primary Active Transporters				(M5948)HALLMARK BILE ACID METABOLISM	0	0	0	0	0	0	0	0	0	0	0	0	0	0	1	0	0	0	0	0
ABCC2	1244	symbol	H. sapiens	1244	H. sapiens	ABCC2	ATP binding cassette subfamily C member 2	GO:1901086 benzylpenicillin metabolic process;GO:0015694 mercury ion transport;GO:0042316 penicillin metabolic process		Transporters/Primary Active Transporters		Adenosine triphosphate (Organic anion transmembrane transporter activity);Sulfinpyrazone (Organic anion transmembrane transporter activity)		(M5934)HALLMARK XENOBIOTIC METABOLISM	0	1	0	0	1	0	0	0	0	0	0	0	0	0	1	0	1	1	0	0
ABCC3	8714	symbol	H. sapiens	8714	H. sapiens	ABCC3	ATP binding cassette subfamily C member 3	GO:0015721 bile acid and bile salt transport;GO:0015718 monocarboxylic acid transport;GO:0046942 carboxylic acid transport		Transporters/Primary Active Transporters	Plasma membrane			(M5934)HALLMARK XENOBIOTIC METABOLISM	0	1	0	0	0	0	0	0	0	0	0	0	0	0	1	0	0	0	0	0
ABCD1	215	symbol	H. sapiens	215	H. sapiens	ABCD1	ATP binding cassette subfamily D member 1	GO:0015910 peroxisomal long-chain fatty acid import;GO:0033540 fatty acid beta-oxidation using acyl-CoA oxidase;GO:0042758 long-chain fatty acid catabolic process		Transporters/Primary Active Transporters				(M5949)HALLMARK PEROXISOME; (M5948)HALLMARK BILE ACID METABOLISM	1	1	0	0	0	0	0	0	0	0	0	1	0	0	1	0	0	0	0	0
ABCD2	225	symbol	H. sapiens	225	H. sapiens	ABCD2	ATP binding cassette subfamily D member 2	GO:0032000 positive regulation of fatty acid beta-oxidation;GO:0042760 very long-chain fatty acid catabolic process;GO:0031998 regulation of fatty acid beta-oxidation		Transporters/Primary Active Transporters	Vesicles			(M5949)HALLMARK PEROXISOME; (M5948)HALLMARK BILE ACID METABOLISM; (M5934)HALLMARK XENOBIOTIC METABOLISM	1	1	0	0	0	0	0	0	0	0	0	1	0	0	1	0	0	0	0	0
ABHD16B	140701	symbol	H. sapiens	140701	H. sapiens	ABHD16B	abhydrolase domain containing 16B				Nucleus but not nucleoli				0	0	0	0	0	0	0	0	0	0	0	0	0	0	0	0	0	0	0	0
ABT1	29777	symbol	H. sapiens	29777	H. sapiens	ABT1	activator of basal transcription 1	GO:0034462 small-subunit processome assembly;GO:0000472 endonucleolytic cleavage to generate mature 5'-end of SSU-rRNA from (SSU-rRNA, 5.8S rRNA, LSU-rRNA);GO:0000480 endonucleolytic cleavage in 5'-ETS of tricistronic rRNA transcript (SSU-rRNA, 5.8S rRNA, LSU-rRNA)							0	0	0	1	0	0	0	0	0	0	0	0	0	0	0	0	0	0	0	0
ABTB2	25841	symbol	H. sapiens	25841	H. sapiens	ABTB2	ankyrin repeat and BTB domain containing 2	GO:0097237 cellular response to toxic substance;GO:0042787 protein ubiquitination involved in ubiquitin-dependent protein catabolic process;GO:0043161 proteasome-mediated ubiquitin-dependent protein catabolic process			Nucleus				0	0	0	0	0	0	0	0	0	0	0	0	0	0	0	0	0	0	0	0
ACACB	32	symbol	H. sapiens	32	H. sapiens	ACACB	acetyl-CoA carboxylase beta	GO:0031999 negative regulation of fatty acid beta-oxidation;GO:0006853 carnitine shuttle;GO:0046322 negative regulation of fatty acid oxidation		Enzymes/ENZYME proteins/Ligase		Biotin (Metal ion binding);Adenine (Metal ion binding);Soraphen A (Metal ion binding);2-[4-(2,4-Dichlorophenoxy)Phenoxy]Propanoic Acid (Metal ion binding);(2S)-2-(4-{[3-CHLORO-5-(TRIFLUOROMETHYL)PYRIDIN-2-YL]OXY}PHENOXY)PROPANOIC ACID (Metal ion binding)			1	1	0	0	0	0	1	0	0	0	0	1	0	0	0	0	0	0	0	0
ACAD11	84129	symbol	H. sapiens	84129	H. sapiens	ACAD11	acyl-CoA dehydrogenase family member 11	GO:0033539 fatty acid beta-oxidation using acyl-CoA dehydrogenase;GO:0006635 fatty acid beta-oxidation;GO:0009062 fatty acid catabolic process							1	1	0	0	0	0	0	0	0	0	0	1	0	0	0	0	0	0	0	0
ACADS	35	symbol	H. sapiens	35	H. sapiens	ACADS	acyl-CoA dehydrogenase, C-2 to C-3 short chain	GO:0046359 butyrate catabolic process;GO:0019605 butyrate metabolic process;GO:0019626 short-chain fatty acid catabolic process		Enzymes/ENZYME proteins/Oxidoreductases	Nucleus but not nucleoli;Centrosome	NADH (Flavin adenine dinucleotide binding);Acetoacetyl-Coenzyme A (Flavin adenine dinucleotide binding);Flavin adenine dinucleotide (Flavin adenine dinucleotide binding)		(M5935)HALLMARK FATTY ACID METABOLISM; (M5905)HALLMARK ADIPOGENESIS	1	1	0	0	0	0	0	0	0	0	0	1	0	0	0	0	0	0	0	0
ACAP2	23527	symbol	H. sapiens	23527	H. sapiens	ACAP2	ArfGAP with coiled-coil, ankyrin repeat and PH domains 2	GO:0036010 protein localization to endosome;GO:1990090 cellular response to nerve growth factor stimulus;GO:1990089 response to nerve growth factor			Nucleoli		(M86)PID ARF6 PATHWAY		0	0	0	0	0	0	0	0	0	0	0	0	0	0	0	0	0	0	0	0
ACOT2	10965	symbol	H. sapiens	10965	H. sapiens	ACOT2	acyl-CoA thioesterase 2	GO:0035338 long-chain fatty-acyl-CoA biosynthetic process;GO:0046949 fatty-acyl-CoA biosynthetic process;GO:0035336 long-chain fatty-acyl-CoA metabolic process		Enzymes/ENZYME proteins/Hydrolases	Mitochondria			(M5935)HALLMARK FATTY ACID METABOLISM	0	1	0	0	0	0	0	0	0	0	0	0	0	0	0	0	0	0	0	0
ACOX2	8309	symbol	H. sapiens	8309	H. sapiens	ACOX2	acyl-CoA oxidase 2	GO:0033540 fatty acid beta-oxidation using acyl-CoA oxidase;GO:0033539 fatty acid beta-oxidation using acyl-CoA dehydrogenase;GO:0006699 bile acid biosynthetic process		Enzymes/ENZYME proteins/Oxidoreductases	Vesicles			(M5946)HALLMARK COAGULATION; (M5907)HALLMARK ESTROGEN RESPONSE LATE; (M5934)HALLMARK XENOBIOTIC METABOLISM	1	1	0	0	0	0	0	0	0	0	0	1	0	0	0	0	0	0	0	0
ACTL6B	51412	symbol	H. sapiens	51412	H. sapiens	ACTL6B	actin like 6B	GO:0021510 spinal cord development;GO:0006338 chromatin remodeling;GO:0016569 covalent chromatin modification			Nucleoli				0	0	0	0	0	0	0	0	0	0	0	0	0	0	0	0	0	0	0	0
ACTL7A	10881	symbol	H. sapiens	10881	H. sapiens	ACTL7A	actin like 7A	GO:0007010 cytoskeleton organization;GO:0006996 organelle organization;GO:0016043 cellular component organization			Nucleus				0	0	0	0	0	0	0	0	0	0	0	0	0	0	0	0	0	0	0	0
ACTRT2	140625	symbol	H. sapiens	140625	H. sapiens	ACTRT2	actin related protein T2								0	0	0	0	0	0	0	0	0	0	0	0	0	0	0	0	0	0	0	0
ADAM7	8756	symbol	H. sapiens	8756	H. sapiens	ADAM7	ADAM metallopeptidase domain 7	GO:0006508 proteolysis;GO:0019538 protein metabolic process;GO:0043170 macromolecule metabolic process		Enzymes/Peptidases/Metallopeptidases			(M3468)NABA ECM REGULATORS; (M5885)NABA MATRISOME ASSOCIATED; (M5889)NABA MATRISOME		0	0	0	0	0	0	0	0	0	0	0	0	0	0	0	0	0	0	0	0
ADAP2	55803	symbol	H. sapiens	55803	H. sapiens	ADAP2	ArfGAP with dual PH domains 2	GO:0043547 positive regulation of GTPase activity;GO:0043087 regulation of GTPase activity;GO:0051345 positive regulation of hydrolase activity							0	0	0	0	0	0	0	0	0	0	0	0	0	0	0	0	0	0	0	0
ADAT1	23536	symbol	H. sapiens	23536	H. sapiens	ADAT1	adenosine deaminase, tRNA specific 1	GO:0008033 tRNA processing;GO:0006399 tRNA metabolic process;GO:0034470 ncRNA processing		Enzymes/ENZYME proteins/Hydrolases	Nucleus				0	0	0	1	0	0	0	0	0	0	0	0	0	0	0	0	0	0	0	0
ADAT2	134637	symbol	H. sapiens	134637	H. sapiens	ADAT2	adenosine deaminase, tRNA specific 2	GO:0002100 tRNA wobble adenosine to inosine editing;GO:0002097 tRNA wobble base modification;GO:0006400 tRNA modification			Golgi apparatus				0	0	0	1	0	0	0	0	0	0	0	0	0	0	0	0	0	0	0	0
ADI1	55256	symbol	H. sapiens	55256	H. sapiens	ADI1	acireductone dioxygenase 1	GO:0019509 L-methionine biosynthetic process from methylthioadenosine;GO:0071267 L-methionine salvage;GO:0071265 L-methionine biosynthetic process		Enzymes/ENZYME proteins/Oxidoreductases	Nucleus but not nucleoli	Isopropyl Alcohol (Oxidoreductase activity)			0	1	0	0	0	0	0	0	0	0	0	1	0	0	0	0	0	0	0	0
ADIPOQ	9370	symbol	H. sapiens	9370	H. sapiens	ADIPOQ	adiponectin, C1Q and collagen domain containing	GO:2000478 positive regulation of metanephric glomerular visceral epithelial cell development;GO:2000477 regulation of metanephric glomerular visceral epithelial cell development;GO:0072249 metanephric glomerular visceral epithelial cell development					(M3008)NABA ECM GLYCOPROTEINS; (M5884)NABA CORE MATRISOME; (M5889)NABA MATRISOME	(M5905)HALLMARK ADIPOGENESIS	1	1	0	0	1	1	1	0	0	1	0	1	0	0	0	1	0	0	0	0
ADM2	79924	symbol	H. sapiens	79924	H. sapiens	ADM2	adrenomedullin 2	GO:0045766 positive regulation of angiogenesis;GO:0045776 negative regulation of blood pressure;GO:0045765 regulation of angiogenesis							0	0	0	0	0	0	0	0	0	0	0	0	0	0	0	0	0	0	0	0
ADORA1	134	symbol	H. sapiens	134	H. sapiens	ADORA1	adenosine A1 receptor	GO:0042323 negative regulation of circadian sleep/wake cycle, non-REM sleep;GO:1900453 negative regulation of long term synaptic depression;GO:0042321 negative regulation of circadian sleep/wake cycle, sleep		G-protein coupled receptors/{Adenosine and adenine nucleotide receptors,GPCRs excl olfactory receptors};Transporters	Nucleoli	Caffeine (Purine nucleoside binding);Theophylline (Purine nucleoside binding);Adenosine (Purine nucleoside binding);Dyphylline (Purine nucleoside binding);Pentoxifylline (Purine nucleoside binding);Enprofylline (Purine nucleoside binding);Gabapentin (Purine nucleoside binding);Aminophylline (Purine nucleoside binding);Oxtriphylline (Purine nucleoside binding);Theobromine (Purine nucleoside bindin…			1	0	0	0	0	0	0	0	0	1	0	0	1	1	0	0	0	1	0	0
AFMID	125061	symbol	H. sapiens	125061	H. sapiens	AFMID	arylformamidase	GO:0019441 tryptophan catabolic process to kynurenine;GO:0006569 tryptophan catabolic process;GO:0046218 indolalkylamine catabolic process		Enzymes/ENZYME proteins/Hydrolases	Mitochondria				1	1	0	0	0	0	0	1	0	0	0	0	0	0	0	0	0	0	0	0
AGGF1	55109	symbol	H. sapiens	55109	H. sapiens	AGGF1	angiogenic factor with G-patch and FHA domains 1	GO:0045766 positive regulation of angiogenesis;GO:0001570 vasculogenesis;GO:0001938 positive regulation of endothelial cell proliferation						(M5942)HALLMARK UV RESPONSE DN	0	0	0	0	0	0	0	0	0	0	0	0	0	0	0	0	0	0	0	0
AGT	183	symbol	H. sapiens	183	H. sapiens	AGT	angiotensinogen	GO:1905010 positive regulation of L-lysine import into cell;GO:1902828 positive regulation of L-arginine import into cell;GO:1905008 regulation of L-lysine import into cell				PS433540 (Type 2 angiotensin receptor binding)	(M11)PID PRL SIGNALING EVENTS PATHWAY; (M167)PID AP1 PATHWAY; (M3468)NABA ECM REGULATORS		0	1	0	0	0	0	0	0	0	1	0	0	0	0	0	1	0	1	0	0
AICDA	57379	symbol	H. sapiens	57379	H. sapiens	AICDA	activation induced cytidine deaminase	GO:0090310 negative regulation of methylation-dependent chromatin silencing;GO:0009972 cytidine deamination;GO:0006216 cytidine catabolic process		Enzymes/ENZYME proteins/Hydrolases			(M28)PID IL4 2PATHWAY		1	0	0	0	0	1	0	1	0	0	0	0	0	0	0	0	1	0	1	0
AK3	50808	symbol	H. sapiens	50808	H. sapiens	AK3	adenylate kinase 3	GO:0046041 ITP metabolic process;GO:0046051 UTP metabolic process;GO:0046033 AMP metabolic process		Enzymes/ENZYME proteins/Transferases				(M5898)HALLMARK DNA REPAIR; (M5937)HALLMARK GLYCOLYSIS	0	0	0	0	0	0	0	0	0	0	1	0	1	0	0	0	0	0	1	0
AK7	122481	symbol	H. sapiens	122481	H. sapiens	AK7	adenylate kinase 7	GO:0015949 nucleobase-containing small molecule interconversion;GO:0006165 nucleoside diphosphate phosphorylation;GO:0009142 nucleoside triphosphate biosynthetic process		Enzymes/ENZYME proteins/Transferases					0	0	0	0	0	0	0	0	0	0	1	0	0	0	0	0	0	0	1	0
AKAP8	10270	symbol	H. sapiens	10270	H. sapiens	AKAP8	A-kinase anchoring protein 8	GO:0031065 positive regulation of histone deacetylation;GO:0071380 cellular response to prostaglandin E stimulus;GO:0033127 regulation of histone phosphorylation			Nucleus but not nucleoli				0	0	0	0	0	0	0	0	0	0	0	0	0	0	0	1	1	0	0	0
ALDH3A2	224	symbol	H. sapiens	224	H. sapiens	ALDH3A2	aldehyde dehydrogenase 3 family member A2	GO:0033306 phytol metabolic process;GO:0001561 fatty acid alpha-oxidation;GO:1903173 fatty alcohol metabolic process		Enzymes/ENZYME proteins/Oxidoreductases		NADH (Medium-chain-aldehyde dehydrogenase activity)		(M5935)HALLMARK FATTY ACID METABOLISM; (M5907)HALLMARK ESTROGEN RESPONSE LATE	1	1	0	0	0	0	0	0	0	0	0	1	0	0	0	0	0	0	0	0
ALDH4A1	8659	symbol	H. sapiens	8659	H. sapiens	ALDH4A1	aldehyde dehydrogenase 4 family member A1	GO:0010133 proline catabolic process to glutamate;GO:0019470 4-hydroxyproline catabolic process;GO:0006562 proline catabolic process		Enzymes/ENZYME proteins/Oxidoreductases	Cytoplasm	NADH (Identical protein binding)			1	1	0	0	0	0	0	1	0	0	0	1	0	0	0	0	0	0	0	0
ALDH5A1	7915	symbol	H. sapiens	7915	H. sapiens	ALDH5A1	aldehyde dehydrogenase 5 family member A1	GO:0006681 galactosylceramide metabolic process;GO:0006678 glucosylceramide metabolic process;GO:0009450 gamma-aminobutyric acid catabolic process		Enzymes/ENZYME proteins/Oxidoreductases	Mitochondria	Succinic acid (Succinate-semialdehyde dehydrogenase [nad(p)+] activity);NADH (Succinate-semialdehyde dehydrogenase [nad(p)+] activity);Valproic Acid (Succinate-semialdehyde dehydrogenase [nad(p)+] activity);Chlormerodrin (Succinate-semialdehyde dehydrogenase [nad(p)+] activity)			1	1	0	0	0	0	1	1	0	0	0	1	0	0	0	0	0	0	0	0
ALDH9A1	223	symbol	H. sapiens	223	H. sapiens	ALDH9A1	aldehyde dehydrogenase 9 family member A1	GO:0045329 carnitine biosynthetic process;GO:0006578 amino-acid betaine biosynthetic process;GO:0042136 neurotransmitter biosynthetic process		Enzymes/ENZYME proteins/Oxidoreductases	Cytoplasm	NADH (Aminobutyraldehyde dehydrogenase activity)	(M254)PID MYC REPRESS PATHWAY	(M5949)HALLMARK PEROXISOME; (M5948)HALLMARK BILE ACID METABOLISM; (M5935)HALLMARK FATTY ACID METABOLISM	0	0	0	0	0	0	0	0	0	0	0	1	0	0	0	0	0	0	0	0
ALG1	56052	symbol	H. sapiens	56052	H. sapiens	ALG1	ALG1, chitobiosyldiphosphodolichol beta-mannosyltransferase	GO:0009103 lipopolysaccharide biosynthetic process;GO:0008653 lipopolysaccharide metabolic process;GO:0006488 dolichol-linked oligosaccharide biosynthetic process		Enzymes/ENZYME proteins/Transferases				(M5937)HALLMARK GLYCOLYSIS	0	1	0	0	0	0	1	0	0	0	0	0	0	0	0	0	0	0	0	1
ALG12	79087	symbol	H. sapiens	79087	H. sapiens	ALG12	ALG12, alpha-1,6-mannosyltransferase	GO:0006488 dolichol-linked oligosaccharide biosynthetic process;GO:0006490 oligosaccharide-lipid intermediate biosynthetic process;GO:0097502 mannosylation		Enzymes/ENZYME proteins/Transferases					0	0	0	0	0	0	0	0	0	0	0	0	0	0	0	0	0	0	0	1
ALG6	29929	symbol	H. sapiens	29929	H. sapiens	ALG6	ALG6, alpha-1,3-glucosyltransferase	GO:0006488 dolichol-linked oligosaccharide biosynthetic process;GO:0006490 oligosaccharide-lipid intermediate biosynthetic process;GO:0006487 protein N-linked glycosylation		Enzymes/ENZYME proteins/Transferases	Endoplasmic reticulum				0	0	0	0	0	0	0	0	0	0	0	0	0	0	0	0	0	0	0	1
ALOX15	246	symbol	H. sapiens	246	H. sapiens	ALOX15	arachidonate 15-lipoxygenase	GO:2001303 lipoxin A4 biosynthetic process;GO:2001301 lipoxin biosynthetic process;GO:2001302 lipoxin A4 metabolic process		Enzymes/ENZYME proteins/Oxidoreductases		(2E)-3-(2-OCT-1-YN-1-YLPHENYL)ACRYLIC ACID (Phosphatidylinositol-4,5-bisphosphate binding)	(M28)PID IL4 2PATHWAY	(M5951)HALLMARK SPERMATOGENESIS	0	1	0	0	1	1	0	0	0	1	0	1	0	0	0	0	0	0	1	0
ALOX5	240	symbol	H. sapiens	240	H. sapiens	ALOX5	arachidonate 5-lipoxygenase	GO:2001300 lipoxin metabolic process;GO:0002540 leukotriene production involved in inflammatory response;GO:0019370 leukotriene biosynthetic process		Enzymes/ENZYME proteins/Oxidoreductases		Vitamin E (Iron ion binding);Masoprocol (Iron ion binding);Aminosalicylic Acid (Iron ion binding);Mesalazine (Iron ion binding);Montelukast (Iron ion binding);Diclofenac (Iron ion binding);Diethylcarbamazine (Iron ion binding);Zileuton (Iron ion binding);Sulfasalazine (Iron ion binding);Meclofenamic acid (Iron ion binding);Balsalazide (Iron ion binding);Minocycline (Iron ion binding);Hyperforin (…			0	1	0	0	0	0	0	0	1	1	0	1	0	0	0	0	0	0	0	0
ALPI	248	symbol	H. sapiens	248	H. sapiens	ALPI	alkaline phosphatase, intestinal	GO:0016311 dephosphorylation;GO:0006796 phosphate-containing compound metabolic process;GO:0006793 phosphorus metabolic process		Enzymes/ENZYME proteins/Hydrolases					0	1	0	0	0	0	0	0	0	0	0	0	0	0	0	0	0	0	0	0
ALX4	60529	symbol	H. sapiens	60529	H. sapiens	ALX4	ALX homeobox 4	GO:0035116 embryonic hindlimb morphogenesis;GO:0035115 embryonic forelimb morphogenesis;GO:0042733 embryonic digit morphogenesis		Transcription factors/Helix-turn-helix domains					0	0	0	0	0	0	0	0	0	0	0	0	0	0	0	0	0	0	0	0
AMN	81693	symbol	H. sapiens	81693	H. sapiens	AMN	amnion associated transmembrane protein	GO:0015889 cobalamin transport;GO:0009235 cobalamin metabolic process;GO:0043001 Golgi to plasma membrane protein transport			Nucleoli	Hydroxocobalamin (Receptor binding)			0	1	0	0	0	0	0	0	0	0	0	0	0	0	0	0	0	0	0	0
AMT	275	symbol	H. sapiens	275	H. sapiens	AMT	aminomethyltransferase	GO:0019464 glycine decarboxylation via glycine cleavage system;GO:0006546 glycine catabolic process;GO:0009071 serine family amino acid catabolic process		Enzymes/ENZYME proteins/Transferases		Tetrahydrofolic acid (Transaminase activity);NADH (Transaminase activity);5-methyltetrahydrofolate (Transaminase activity)			1	1	0	0	0	0	0	1	0	0	0	0	0	0	0	0	0	0	0	0
ANAPC1	64682	symbol	H. sapiens	64682	H. sapiens	ANAPC1	anaphase promoting complex subunit 1	GO:0051437 positive regulation of ubiquitin-protein ligase activity involved in regulation of mitotic cell cycle transition;GO:0051436 negative regulation of ubiquitin-protein ligase activity involved in mitotic cell cycle;GO:1904667 negative regulation of ubiquitin protein ligase activity			Vesicles				0	0	0	0	0	0	0	0	0	0	0	0	0	0	0	0	0	0	0	0
ANAPC7	51434	symbol	H. sapiens	51434	H. sapiens	ANAPC7	anaphase promoting complex subunit 7	GO:0051437 positive regulation of ubiquitin-protein ligase activity involved in regulation of mitotic cell cycle transition;GO:0051436 negative regulation of ubiquitin-protein ligase activity involved in mitotic cell cycle;GO:1904667 negative regulation of ubiquitin protein ligase activity			Nucleus but not nucleoli				0	0	0	0	0	0	0	0	0	0	0	0	0	0	0	0	0	0	0	0
ANKRD34C	390616	symbol	H. sapiens	390616	H. sapiens	ANKRD34C	ankyrin repeat domain 34C				Mitochondria				0	0	0	0	0	0	0	0	0	0	0	0	0	0	0	0	0	0	0	0
ANXA13	312	symbol	H. sapiens	312	H. sapiens	ANXA13	annexin A13	GO:0030154 cell differentiation;GO:0048869 cellular developmental process;GO:0044767 single-organism developmental process			Plasma membrane		(M5880)NABA ECM AFFILIATED; (M5885)NABA MATRISOME ASSOCIATED; (M5889)NABA MATRISOME	(M5892)HALLMARK CHOLESTEROL HOMEOSTASIS	0	0	0	0	0	0	0	0	0	0	0	0	0	0	0	0	0	0	0	0
AP1M1	8907	symbol	H. sapiens	8907	H. sapiens	AP1M1	adaptor related protein complex 1 mu 1 subunit	GO:0035646 endosome to melanosome transport;GO:0043485 endosome to pigment granule transport;GO:0050690 regulation of defense response to virus by virus					(M156)PID ECADHERIN NASCENT AJ PATHWAY		0	0	1	0	0	0	0	0	1	1	0	0	0	0	0	0	1	0	0	0
AP1S3	130340	symbol	H. sapiens	130340	H. sapiens	AP1S3	adaptor related protein complex 1 sigma 3 subunit	GO:0050690 regulation of defense response to virus by virus;GO:0019886 antigen processing and presentation of exogenous peptide antigen via MHC class II;GO:0002495 antigen processing and presentation of peptide antigen via MHC class II							0	0	1	0	0	0	0	0	0	1	0	0	0	0	0	0	1	0	0	0
AP3D1	8943	symbol	H. sapiens	8943	H. sapiens	AP3D1	adaptor related protein complex 3 delta 1 subunit	GO:0051138 positive regulation of NK T cell differentiation;GO:0051136 regulation of NK T cell differentiation;GO:0001865 NK T cell differentiation			Nucleus but not nucleoli				0	0	1	0	0	1	0	0	0	0	0	0	0	0	0	0	0	1	0	0
AP3S2	10239	symbol	H. sapiens	10239	H. sapiens	AP3S2	adaptor related protein complex 3 sigma 2 subunit	GO:0048490 anterograde synaptic vesicle transport;GO:0099517 synaptic vesicle transport along microtubule;GO:0008089 anterograde axonal transport			Vesicles				0	0	1	0	0	0	0	0	0	0	0	0	0	0	0	0	0	0	0	0
AP5S1	55317	symbol	H. sapiens	55317	H. sapiens	AP5S1	adaptor related protein complex 5 sigma 1 subunit	GO:0000724 double-strand break repair via homologous recombination;GO:0000725 recombinational repair;GO:0006302 double-strand break repair			Nucleus				0	0	0	0	0	0	0	0	0	0	0	0	0	0	0	0	0	0	0	0
APBA3	9546	symbol	H. sapiens	9546	H. sapiens	APBA3	amyloid beta precursor protein binding family A member 3	GO:0001701 in utero embryonic development;GO:0007268 chemical synaptic transmission;GO:0098916 anterograde trans-synaptic signaling			Vesicles				0	0	0	0	0	0	0	0	0	0	0	0	0	0	0	0	0	0	0	0
APLNR	187	symbol	H. sapiens	187	H. sapiens	APLNR	apelin receptor	GO:0007369 gastrulation;GO:0050878 regulation of body fluid levels;GO:0007507 heart development		G-protein coupled receptors/GPCRs excl olfactory receptors;Transporters				(M5909)HALLMARK MYOGENESIS; (M5932)HALLMARK INFLAMMATORY RESPONSE	0	0	0	0	0	0	0	0	0	0	0	0	1	0	0	0	0	0	0	0
APOLD1	81575	symbol	H. sapiens	81575	H. sapiens	APOLD1	apolipoprotein L domain containing 1	GO:0045601 regulation of endothelial cell differentiation;GO:0042118 endothelial cell activation;GO:0045446 endothelial cell differentiation			Nucleus but not nucleoli;Cytoplasm				0	0	0	0	0	1	0	0	0	0	0	0	0	0	0	0	0	0	0	0
AQP2	359	symbol	H. sapiens	359	H. sapiens	AQP2	aquaporin 2	GO:0003097 renal water transport;GO:0072205 metanephric collecting duct development;GO:0071288 cellular response to mercury ion		Transporters/Transporter channels and pores					0	0	0	0	0	0	0	0	0	0	0	0	1	0	1	0	0	1	0	0
ARHGAP1	392	symbol	H. sapiens	392	H. sapiens	ARHGAP1	Rho GTPase activating protein 1	GO:0007266 Rho protein signal transduction;GO:0043547 positive regulation of GTPase activity;GO:0051056 regulation of small GTPase mediated signal transduction			Vesicles		(M83)PID CDC42 REG PATHWAY; (M241)PID RAC1 REG PATHWAY; (M5193)SIG CHEMOTAXIS		0	0	0	0	0	0	0	0	0	0	0	0	0	0	0	0	0	0	0	0
ARHGAP28	79822	symbol	H. sapiens	79822	H. sapiens	ARHGAP28	Rho GTPase activating protein 28	GO:0051497 negative regulation of stress fiber assembly;GO:1904425 negative regulation of GTP binding;GO:0032232 negative regulation of actin filament bundle assembly			Nucleus but not nucleoli;Cell Junctions				0	0	0	0	0	0	0	0	0	0	0	0	0	0	0	0	0	0	0	0
ARHGEF16	27237	symbol	H. sapiens	27237	H. sapiens	ARHGEF16	Rho guanine nucleotide exchange factor 16	GO:0090004 positive regulation of establishment of protein localization to plasma membrane;GO:1903078 positive regulation of protein localization to plasma membrane;GO:0090003 regulation of establishment of protein localization to plasma membrane							0	0	0	0	0	0	0	0	0	0	0	0	0	0	0	0	0	0	0	0
ARHGEF39	84904	symbol	H. sapiens	84904	H. sapiens	ARHGEF39	Rho guanine nucleotide exchange factor 39	GO:0035023 regulation of Rho protein signal transduction;GO:0007266 Rho protein signal transduction;GO:0046578 regulation of Ras protein signal transduction							0	0	0	0	0	0	0	0	0	0	0	0	0	0	0	0	0	0	0	0
ARL11	115761	symbol	H. sapiens	115761	H. sapiens	ARL11	ADP ribosylation factor like GTPase 11	GO:0002244 hematopoietic progenitor cell differentiation;GO:0030097 hemopoiesis;GO:0048534 hematopoietic or lymphoid organ development			Cytoskeleton (Intermediate filaments)				0	0	0	0	0	0	0	0	0	0	0	0	0	0	0	0	0	0	0	0
ARMC6	93436	symbol	H. sapiens	93436	H. sapiens	ARMC6	armadillo repeat containing 6	GO:0002244 hematopoietic progenitor cell differentiation;GO:0030097 hemopoiesis;GO:0048534 hematopoietic or lymphoid organ development			Cytoplasm				0	0	0	0	0	0	0	0	0	0	0	0	0	0	0	0	0	0	0	0
ARMC7	79637	symbol	H. sapiens	79637	H. sapiens	ARMC7	armadillo repeat containing 7				Cytoplasm				0	0	0	0	0	0	0	0	0	0	0	0	0	0	0	0	0	0	0	0
ARMT1	79624	symbol	H. sapiens	79624	H. sapiens	ARMT1	acidic residue methyltransferase 1	GO:2001020 regulation of response to DNA damage stimulus;GO:0006479 protein methylation;GO:0008213 protein alkylation			Nucleus;Cytoplasm				0	0	0	0	0	0	0	0	0	0	0	0	0	0	0	0	0	0	0	0
ARSK	153642	symbol	H. sapiens	153642	H. sapiens	ARSK	arylsulfatase family member K	GO:0006687 glycosphingolipid metabolic process;GO:0043687 post-translational protein modification;GO:0006664 glycolipid metabolic process			Vesicles				0	1	0	0	0	0	0	0	0	0	0	0	0	0	0	0	0	0	0	0
ASB1	51665	symbol	H. sapiens	51665	H. sapiens	ASB1	ankyrin repeat and SOCS box containing 1	GO:0042036 negative regulation of cytokine biosynthetic process;GO:0030539 male genitalia development;GO:0042035 regulation of cytokine biosynthetic process			Nucleus but not nucleoli				0	0	0	0	0	0	0	0	0	0	0	0	0	0	0	1	0	0	0	0
ASB16	92591	symbol	H. sapiens	92591	H. sapiens	ASB16	ankyrin repeat and SOCS box containing 16	GO:0016567 protein ubiquitination;GO:0032446 protein modification by small protein conjugation;GO:0070647 protein modification by small protein conjugation or removal							0	0	0	0	0	0	0	0	0	0	0	0	0	0	0	0	0	0	0	0
ATG16L1	55054	symbol	H. sapiens	55054	H. sapiens	ATG16L1	autophagy related 16 like 1	GO:0039689 negative stranded viral RNA replication;GO:0039694 viral RNA genome replication;GO:0044034 multi-organism biosynthetic process			Cytoplasm				0	0	0	0	0	0	0	0	0	0	0	0	0	0	0	0	0	0	0	0
ATM	472	symbol	H. sapiens	472	H. sapiens	ATM	ATM serine/threonine kinase	GO:0072434 signal transduction involved in mitotic G2 DNA damage checkpoint;GO:0002331 pre-B cell allelic exclusion;GO:1904884 positive regulation of telomerase catalytic core complex assembly	Atypical: PI3/PI4-kinase family	Enzymes/{ENZYME proteins/Transferases,Kinases/Atypical kinases}	Nucleus but not nucleoli	Caffeine (Protein serine/threonine kinase activity)	(M37)PID NFKAPPAB CANONICAL PATHWAY; (M20)PID P38 MKK3 6PATHWAY; (M258)PID BARD1 PATHWAY		0	1	0	1	0	1	0	0	0	0	0	0	0	0	0	0	0	0	1	0
ATP1A2	477	symbol	H. sapiens	477	H. sapiens	ATP1A2	ATPase Na+/K+ transporting subunit alpha 2	GO:0051946 regulation of glutamate uptake involved in transmission of nerve impulse;GO:0010881 regulation of cardiac muscle contraction by regulation of the release of sequestered calcium ion;GO:0010880 regulation of release of sequestered calcium ion into cytosol by sarcoplasmic reticulum		Enzymes/ENZYME proteins/Hydrolases;Transporters/Primary Active Transporters					0	0	0	0	0	0	0	0	0	0	0	0	0	0	1	0	0	1	1	0
ATP5D	513	symbol	H. sapiens	513	H. sapiens	ATP5D	ATP synthase, H+ transporting, mitochondrial F1 complex, delta subunit	GO:0042776 mitochondrial ATP synthesis coupled proton transport;GO:0015986 ATP synthesis coupled proton transport;GO:0006754 ATP biosynthetic process				Enflurane (Transporter activity);Isoflurane (Transporter activity);Methoxyflurane (Transporter activity);Halothane (Transporter activity);Desflurane (Transporter activity);Sevoflurane (Transporter activity)		(M5936)HALLMARK OXIDATIVE PHOSPHORYLATION	0	0	0	0	0	0	0	0	0	0	0	0	0	0	0	0	0	0	1	1
ATP6V0A2	23545	symbol	H. sapiens	23545	H. sapiens	ATP6V0A2	ATPase H+ transporting V0 subunit a2	GO:0090383 phagosome acidification;GO:0007035 vacuolar acidification;GO:0033572 transferrin transport			Cytoplasm				0	0	1	0	0	0	0	0	0	0	0	0	0	0	1	0	0	1	1	1
ATP6V0D2	245972	symbol	H. sapiens	245972	H. sapiens	ATP6V0D2	ATPase H+ transporting V0 subunit d2	GO:0090383 phagosome acidification;GO:0007035 vacuolar acidification;GO:0033572 transferrin transport			Vesicles				0	0	1	0	0	0	0	0	0	0	0	0	0	0	1	0	0	1	0	0
ATP6V1B1	525	symbol	H. sapiens	525	H. sapiens	ATP6V1B1	ATPase H+ transporting V1 subunit B1	GO:0090383 phagosome acidification;GO:0033572 transferrin transport;GO:0051452 intracellular pH reduction			Nucleus;Nuclear membrane			(M5910)HALLMARK PROTEIN SECRETION; (M5956)HALLMARK KRAS SIGNALING DN	0	0	0	0	0	0	0	0	0	0	0	0	0	0	1	0	0	1	1	0
ATP6V1G2	534	symbol	H. sapiens	534	H. sapiens	ATP6V1G2	ATPase H+ transporting V1 subunit G2	GO:0090383 phagosome acidification;GO:0033572 transferrin transport;GO:0051452 intracellular pH reduction							0	0	0	0	0	0	0	0	0	0	0	0	0	0	1	0	0	1	0	0
ATP8B1	5205	symbol	H. sapiens	5205	H. sapiens	ATP8B1	ATPase phospholipid transporting 8B1	GO:0021650 vestibulocochlear nerve formation;GO:0021648 vestibulocochlear nerve morphogenesis;GO:0021603 cranial nerve formation		Enzymes/ENZYME proteins/Hydrolases;Transporters/Primary Active Transporters	Nucleus;Plasma membrane;Cytoplasm			(M5916)HALLMARK APICAL SURFACE	0	1	0	0	0	0	0	0	0	0	0	0	0	0	1	0	0	0	0	0
AVPI1	60370	symbol	H. sapiens	60370	H. sapiens	AVPI1	arginine vasopressin induced 1	GO:0000187 activation of MAPK activity;GO:0043406 positive regulation of MAP kinase activity;GO:0032147 activation of protein kinase activity			Nucleus;Plasma membrane				0	0	0	0	0	0	0	0	0	0	0	0	0	0	0	0	0	0	0	0
AZGP1	563	symbol	H. sapiens	563	H. sapiens	AZGP1	alpha-2-glycoprotein 1, zinc-binding	GO:0001580 detection of chemical stimulus involved in sensory perception of bitter taste;GO:0050913 sensory perception of bitter taste;GO:0050912 detection of chemical stimulus involved in sensory perception of taste				N-acetyl-alpha-neuraminic acid (Ribonuclease activity)		(M5908)HALLMARK ANDROGEN RESPONSE	0	0	0	0	0	0	0	0	0	0	0	0	0	0	1	0	0	0	0	0
B3GALNT1	8706	symbol	H. sapiens	8706	H. sapiens	B3GALNT1	beta-1,3-N-acetylgalactosaminyltransferase 1 (globoside blood group)	GO:0009312 oligosaccharide biosynthetic process;GO:0009311 oligosaccharide metabolic process;GO:0006486 protein glycosylation		Blood group antigen proteins;Enzymes/ENZYME proteins/Transferases	Vesicles				0	1	0	0	0	0	1	0	0	0	0	0	0	0	0	0	0	0	0	1
B3GALT4	8705	symbol	H. sapiens	8705	H. sapiens	B3GALT4	beta-1,3-galactosyltransferase 4	GO:0006486 protein glycosylation;GO:0043413 macromolecule glycosylation;GO:0009101 glycoprotein biosynthetic process		Enzymes/ENZYME proteins/Transferases					0	0	0	0	0	0	0	0	0	0	0	0	0	0	0	0	0	0	0	1
B3GALT6	126792	symbol	H. sapiens	126792	H. sapiens	B3GALT6	beta-1,3-galactosyltransferase 6	GO:0030206 chondroitin sulfate biosynthetic process;GO:0050650 chondroitin sulfate proteoglycan biosynthetic process;GO:0030204 chondroitin sulfate metabolic process		Enzymes/ENZYME proteins/Transferases				(M5937)HALLMARK GLYCOLYSIS; (M5891)HALLMARK HYPOXIA	0	0	0	0	0	0	0	1	0	0	0	0	0	0	0	0	0	0	0	1
B3GNT3	10331	symbol	H. sapiens	10331	H. sapiens	B3GNT3	UDP-GlcNAc:betaGal beta-1,3-N-acetylglucosaminyltransferase 3	GO:0030311 poly-N-acetyllactosamine biosynthetic process;GO:0018146 keratan sulfate biosynthetic process;GO:0030309 poly-N-acetyllactosamine metabolic process		Enzymes/ENZYME proteins/Transferases				(M5937)HALLMARK GLYCOLYSIS	0	0	0	0	0	0	1	1	0	0	0	0	0	0	0	0	0	0	0	1
B4GALT7	11285	symbol	H. sapiens	11285	H. sapiens	B4GALT7	beta-1,4-galactosyltransferase 7	GO:0043206 extracellular fibril organization;GO:0097435 fibril organization;GO:0048147 negative regulation of fibroblast proliferation		Enzymes/ENZYME proteins/Transferases				(M5937)HALLMARK GLYCOLYSIS	0	0	0	0	0	0	1	1	0	0	0	0	0	0	0	0	0	0	0	1
B9D2	80776	symbol	H. sapiens	80776	H. sapiens	B9D2	B9 protein domain 2	GO:0007062 sister chromatid cohesion;GO:0060271 cilium assembly;GO:0000819 sister chromatid segregation							0	0	0	0	0	0	0	0	0	0	0	0	0	0	0	0	0	0	0	0
BAALC	79870	symbol	H. sapiens	79870	H. sapiens	BAALC	brain and acute leukemia, cytoplasmic				Cytoplasm				0	0	0	0	0	0	0	0	0	0	0	0	0	0	0	0	0	0	0	0
BAD	572	symbol	H. sapiens	572	H. sapiens	BAD	BCL2 associated agonist of cell death	GO:0060139 positive regulation of apoptotic process by virus;GO:0052151 positive regulation by symbiont of host apoptotic process;GO:0019050 suppression by virus of host apoptotic process		RAS pathway related proteins	Mitochondria	ABT-263 (Protein kinase binding)	(M13096)SA PROGRAMMED CELL DEATH; (M1718)SIG IL4RECEPTOR IN B LYPHOCYTES; (M125)PID IGF1 PATHWAY		1	0	0	0	1	1	1	0	0	0	0	0	0	0	0	0	1	1	1	0
BAG2	9532	symbol	H. sapiens	9532	H. sapiens	BAG2	BCL2 associated athanogene 2	GO:1900034 regulation of cellular response to heat;GO:0034605 cellular response to heat;GO:0009408 response to heat			Nucleus but not nucleoli				0	0	0	0	0	0	0	0	0	0	0	0	0	0	0	0	0	0	0	0
BATF	10538	symbol	H. sapiens	10538	H. sapiens	BATF	basic leucine zipper ATF-like transcription factor	GO:0072540 T-helper 17 cell lineage commitment;GO:0002295 T-helper cell lineage commitment;GO:0072539 T-helper 17 cell differentiation		Transcription factors/Basic domains	Nucleus but not nucleoli			(M5947)HALLMARK IL2 STAT5 SIGNALING; (M5907)HALLMARK ESTROGEN RESPONSE LATE	0	0	0	0	0	1	0	0	0	0	0	0	0	0	0	1	1	0	0	0
BATF3	55509	symbol	H. sapiens	55509	H. sapiens	BATF3	basic leucine zipper ATF-like transcription factor 3	GO:0043011 myeloid dendritic cell differentiation;GO:0097028 dendritic cell differentiation;GO:0001773 myeloid dendritic cell activation		Transcription factors/Basic domains			(M235)PID TCR CALCIUM PATHWAY; (M60)PID NFAT TFPATHWAY	(M5947)HALLMARK IL2 STAT5 SIGNALING	0	0	0	0	0	1	0	0	0	0	0	0	0	0	0	0	1	0	0	0
BBS1	582	symbol	H. sapiens	582	H. sapiens	BBS1	Bardet-Biedl syndrome 1	GO:0043001 Golgi to plasma membrane protein transport;GO:0045494 photoreceptor cell maintenance;GO:1905515 non-motile cilium assembly							0	0	0	0	0	0	0	0	0	0	0	0	0	0	0	0	0	0	0	0
BBS10	79738	symbol	H. sapiens	79738	H. sapiens	BBS10	Bardet-Biedl syndrome 10	GO:0051131 chaperone-mediated protein complex assembly;GO:0045494 photoreceptor cell maintenance;GO:1905515 non-motile cilium assembly			Nucleus but not nucleoli				0	0	0	0	0	0	0	0	0	0	0	0	0	0	0	0	0	0	0	0
BCDIN3D	144233	symbol	H. sapiens	144233	H. sapiens	BCDIN3D	BCDIN3 domain containing RNA methyltransferase	GO:2000632 negative regulation of pre-miRNA processing;GO:2000631 regulation of pre-miRNA processing;GO:1903799 negative regulation of production of miRNAs involved in gene silencing by miRNA			Cytoplasm				0	0	0	1	0	0	0	0	0	0	0	0	0	0	0	0	0	0	0	0
BFAR	51283	symbol	H. sapiens	51283	H. sapiens	BFAR	bifunctional apoptosis regulator	GO:1903895 negative regulation of IRE1-mediated unfolded protein response;GO:1903894 regulation of IRE1-mediated unfolded protein response;GO:1900102 negative regulation of endoplasmic reticulum unfolded protein response					(M14775)ST G ALPHA S PATHWAY; (M8873)ST FAS SIGNALING PATHWAY		0	0	0	0	0	0	0	0	0	0	0	0	0	0	0	0	0	0	0	0
BGN	633	symbol	H. sapiens	633	H. sapiens	BGN	biglycan	GO:0030208 dermatan sulfate biosynthetic process;GO:0030207 chondroitin sulfate catabolic process;GO:0019800 peptide cross-linking via chondroitin 4-sulfate glycosaminoglycan					(M264)PID TOLL ENDOGENOUS PATHWAY; (M5882)NABA PROTEOGLYCANS; (M5884)NABA CORE MATRISOME	(M5902)HALLMARK APOPTOSIS; (M5930)HALLMARK EPITHELIAL MESENCHYMAL TRANSITION; (M5891)HALLMARK HYPOXIA	1	1	0	0	1	0	0	1	0	0	0	0	0	0	0	0	0	0	0	1
BHLHA15	168620	symbol	H. sapiens	168620	H. sapiens	BHLHA15	basic helix-loop-helix family member a15	GO:0010832 negative regulation of myotube differentiation;GO:0048312 intracellular distribution of mitochondria;GO:0006851 mitochondrial calcium ion transport		Transcription factors/Basic domains					0	0	0	0	0	0	0	0	0	0	0	0	0	0	0	0	0	0	0	0
BID	637	symbol	H. sapiens	637	H. sapiens	BID	BH3 interacting domain death agonist	GO:1900740 positive regulation of protein insertion into mitochondrial membrane involved in apoptotic signaling pathway;GO:1900739 regulation of protein insertion into mitochondrial membrane involved in apoptotic signaling pathway;GO:1901030 positive regulation of mitochondrial outer membrane permeabilization involved in apoptotic signaling pathway			Cytoplasm		(M13096)SA PROGRAMMED CELL DEATH; (M84)PID ATM PATHWAY; (M197)PID HIV NEF PATHWAY	(M5941)HALLMARK UV RESPONSE UP; (M5902)HALLMARK APOPTOSIS	0	0	0	0	0	0	0	0	0	0	0	1	0	0	0	0	0	0	1	0
BIN2	51411	symbol	H. sapiens	51411	H. sapiens	BIN2	bridging integrator 2	GO:0097320 membrane tubulation;GO:0071800 podosome assembly;GO:0006911 phagocytosis, engulfment							0	0	0	0	0	0	0	0	0	0	0	0	0	0	0	0	0	0	0	0
BLOC1S3	388552	symbol	H. sapiens	388552	H. sapiens	BLOC1S3	biogenesis of lysosomal organelles complex 1 subunit 3	GO:0048490 anterograde synaptic vesicle transport;GO:0035646 endosome to melanosome transport;GO:0099517 synaptic vesicle transport along microtubule							0	0	0	0	0	1	0	0	0	0	0	0	1	0	0	0	0	0	0	0
BLOC1S6	26258	symbol	H. sapiens	26258	H. sapiens	BLOC1S6	biogenesis of lysosomal organelles complex 1 subunit 6	GO:0048490 anterograde synaptic vesicle transport;GO:0035646 endosome to melanosome transport;GO:0016081 synaptic vesicle docking			Nucleus but not nucleoli;Cytoplasm				0	0	0	0	0	1	0	0	0	0	0	0	1	0	0	0	0	0	0	0
BMP7	655	symbol	H. sapiens	655	H. sapiens	BMP7	bone morphogenetic protein 7	GO:0072125 negative regulation of glomerular mesangial cell proliferation;GO:0021502 neural fold elevation formation;GO:0060686 negative regulation of prostatic bud formation			Vesicles		(M203)PID ALK2 PATHWAY; (M181)PID BMP PATHWAY; (M5883)NABA SECRETED FACTORS		0	0	0	0	1	1	0	0	0	0	0	0	0	0	0	0	0	0	0	0
BOK	666	symbol	H. sapiens	666	H. sapiens	BOK	BOK, BCL2 family apoptosis regulator	GO:1901029 negative regulation of mitochondrial outer membrane permeabilization involved in apoptotic signaling pathway;GO:1901030 positive regulation of mitochondrial outer membrane permeabilization involved in apoptotic signaling pathway;GO:0008635 activation of cysteine-type endopeptidase activity involved in apoptotic process by cytochrome c							0	0	0	0	0	0	0	0	0	0	0	0	0	0	0	0	0	1	0	0
BORCS5	118426	symbol	H. sapiens	118426	H. sapiens	BORCS5	BLOC-1 related complex subunit 5	GO:0072384 organelle transport along microtubule;GO:0032418 lysosome localization;GO:0010970 transport along microtubule			Cytoplasm				0	0	0	0	0	0	0	0	0	0	0	0	0	0	0	0	0	0	0	0
BPI	671	symbol	H. sapiens	671	H. sapiens	BPI	bactericidal/permeability-increasing protein	GO:0043031 negative regulation of macrophage activation;GO:0032717 negative regulation of interleukin-8 production;GO:0032720 negative regulation of tumor necrosis factor production		Transporters/Transporter channels and pores		Di-Stearoyl-3-Sn-Phosphatidylcholine (Lipopolysaccharide binding)			0	0	0	0	0	1	0	0	1	0	0	0	0	0	0	1	1	0	0	0
BPIFC	254240	symbol	H. sapiens	254240	H. sapiens	BPIFC	BPI fold containing family C								0	0	0	0	0	0	0	0	0	0	0	0	0	0	0	0	0	0	0	0
C2CD3	26005	symbol	H. sapiens	26005	H. sapiens	C2CD3	C2 calcium dependent domain containing 3	GO:0061511 centriole elongation;GO:0021997 neural plate axis specification;GO:0071539 protein localization to centrosome			Nucleus;Microtubule organizing center				0	0	0	0	0	0	0	0	0	0	0	0	0	0	0	0	0	0	0	0
C3AR1	719	symbol	H. sapiens	719	H. sapiens	C3AR1	complement C3a receptor 1	GO:0090023 positive regulation of neutrophil chemotaxis;GO:0010759 positive regulation of macrophage chemotaxis;GO:0071624 positive regulation of granulocyte chemotaxis		G-protein coupled receptors/{Chemokines and chemotactic factors receptors,GPCRs excl olfactory receptors}				(M5953)HALLMARK KRAS SIGNALING UP; (M5932)HALLMARK INFLAMMATORY RESPONSE	0	0	0	0	0	0	0	0	1	1	0	0	1	1	0	1	1	1	0	0
C6	729	symbol	H. sapiens	729	H. sapiens	C6	complement C6	GO:0001970 positive regulation of activation of membrane attack complex;GO:0045917 positive regulation of complement activation;GO:0001969 regulation of activation of membrane attack complex		Transporters/Transporter channels and pores					0	0	0	0	0	0	0	0	0	1	0	0	1	1	0	0	1	0	0	0
CABP5	56344	symbol	H. sapiens	56344	H. sapiens	CABP5	calcium binding protein 5	GO:0007165 signal transduction;GO:0044700 single organism signaling;GO:0023052 signaling							0	0	0	0	0	0	0	0	0	0	0	0	0	0	0	0	0	0	0	0
CACNG1	786	symbol	H. sapiens	786	H. sapiens	CACNG1	calcium voltage-gated channel auxiliary subunit gamma 1	GO:0070296 sarcoplasmic reticulum calcium ion transport;GO:0061337 cardiac conduction;GO:0070588 calcium ion transmembrane transport		Transporters/Accessory Factors Involved in Transport		Ibutilide (Voltage-gated calcium channel activity);Diltiazem (Voltage-gated calcium channel activity);Spironolactone (Voltage-gated calcium channel activity);Lercanidipine (Voltage-gated calcium channel activity);Magnesium Sulfate (Voltage-gated calcium channel activity);Ethanol (Voltage-gated calcium channel activity);Nitrendipine (Voltage-gated calcium channel activity);Fluspirilene (Voltage-ga…		(M5956)HALLMARK KRAS SIGNALING DN; (M5909)HALLMARK MYOGENESIS	0	0	0	0	0	0	0	0	0	0	0	0	0	0	0	0	0	0	0	0
CAPN2	824	symbol	H. sapiens	824	H. sapiens	CAPN2	calpain 2	GO:0016540 protein autoprocessing;GO:0007520 myoblast fusion;GO:0022617 extracellular matrix disassembly		Enzymes/{ENZYME proteins/Hydrolases,Peptidases/Cysteine-type peptidases}	Cytoplasm		(M281)PID FAK PATHWAY; (M164)PID ERBB1 DOWNSTREAM PATHWAY	(M5946)HALLMARK COAGULATION	0	0	0	0	0	0	0	0	0	0	0	0	0	0	0	0	0	0	0	0
CARHSP1	23589	symbol	H. sapiens	23589	H. sapiens	CARHSP1	calcium regulated heat stable protein 1	GO:0043488 regulation of mRNA stability;GO:0043487 regulation of RNA stability;GO:0010608 posttranscriptional regulation of gene expression							0	0	0	0	0	0	0	0	0	0	0	0	0	0	0	0	0	0	0	0
CARS2	79587	symbol	H. sapiens	79587	H. sapiens	CARS2	cysteinyl-tRNA synthetase 2, mitochondrial (putative)	GO:0006423 cysteinyl-tRNA aminoacylation;GO:0006418 tRNA aminoacylation for protein translation;GO:0043039 tRNA aminoacylation		Enzymes/ENZYME proteins/Ligase	Nucleus but not nucleoli;Mitochondria	L-Cysteine (Metal ion binding)			0	1	0	1	0	0	0	0	0	0	0	0	0	0	0	0	0	0	0	0
CBR4	84869	symbol	H. sapiens	84869	H. sapiens	CBR4	carbonyl reductase 4	GO:0044597 daunorubicin metabolic process;GO:0044598 doxorubicin metabolic process;GO:0030647 aminoglycoside antibiotic metabolic process						(M5953)HALLMARK KRAS SIGNALING UP	0	1	0	0	0	0	0	0	0	0	0	1	0	0	0	0	0	0	1	0
CCDC146	57639	symbol	H. sapiens	57639	H. sapiens	CCDC146	coiled-coil domain containing 146				Golgi apparatus;Vesicles				0	0	0	0	0	0	0	0	0	0	0	0	0	0	0	0	0	0	0	0
CCDC172	374355	symbol	H. sapiens	374355	H. sapiens	CCDC172	coiled-coil domain containing 172								0	0	0	0	0	0	0	0	0	0	0	0	0	0	0	0	0	0	0	0
CCDC190	339512	symbol	H. sapiens	339512	H. sapiens	CCDC190	coiled-coil domain containing 190				Vesicles				0	0	0	0	0	0	0	0	0	0	0	0	0	0	0	0	0	0	0	0
CCDC39	339829	symbol	H. sapiens	339829	H. sapiens	CCDC39	coiled-coil domain containing 39	GO:0036159 inner dynein arm assembly;GO:0003356 regulation of cilium beat frequency;GO:0035469 determination of pancreatic left/right asymmetry							0	0	0	0	0	0	0	0	0	0	0	0	0	0	0	0	0	0	0	0
CCDC42	146849	symbol	H. sapiens	146849	H. sapiens	CCDC42	coiled-coil domain containing 42								0	0	0	0	0	0	0	0	0	0	0	0	0	0	0	0	0	0	0	0
CCDC65	85478	symbol	H. sapiens	85478	H. sapiens	CCDC65	coiled-coil domain containing 65				Nucleus;Cytoplasm				0	0	0	0	0	0	0	0	0	0	0	0	0	0	0	0	0	0	0	0
CCDC69	26112	symbol	H. sapiens	26112	H. sapiens	CCDC69	coiled-coil domain containing 69				Plasma membrane				0	0	0	0	0	0	0	0	0	0	0	0	0	0	0	0	0	0	0	0
CCDC86	79080	symbol	H. sapiens	79080	H. sapiens	CCDC86	coiled-coil domain containing 86	GO:0016032 viral process;GO:0006364 rRNA processing;GO:0044403 symbiosis, encompassing mutualism through parasitism			Nucleoli				0	0	0	1	0	0	0	0	0	0	0	0	0	0	0	0	0	0	0	0
CCDC91	55297	symbol	H. sapiens	55297	H. sapiens	CCDC91	coiled-coil domain containing 91	GO:0015031 protein transport;GO:0045184 establishment of protein localization;GO:0008104 protein localization			Nucleus but not nucleoli;Golgi apparatus				0	0	0	0	0	0	0	0	0	0	0	0	0	0	0	0	0	0	0	0
CCDC94	55702	symbol	H. sapiens	55702	H. sapiens	CCDC94	coiled-coil domain containing 94				Nucleus but not nucleoli				0	0	0	0	0	0	0	0	0	0	0	0	0	0	0	0	0	0	0	0
CCDC96	257236	symbol	H. sapiens	257236	H. sapiens	CCDC96	coiled-coil domain containing 96				Nucleus;Cytoplasm				0	0	0	0	0	0	0	0	0	0	0	0	0	0	0	0	0	0	0	0
CCL11	6356	symbol	H. sapiens	6356	H. sapiens	CCL11	C-C motif chemokine ligand 11	GO:0060763 mammary duct terminal end bud growth;GO:0048245 eosinophil chemotaxis;GO:0002551 mast cell chemotaxis				CAT-213 (Chemokine activity)	(M222)PID CXCR3 PATHWAY; (M28)PID IL4 2PATHWAY; (M5883)NABA SECRETED FACTORS	(M5950)HALLMARK ALLOGRAFT REJECTION	0	0	0	0	1	0	0	0	0	1	0	0	0	0	0	0	1	1	0	0
CCL22	6367	symbol	H. sapiens	6367	H. sapiens	CCL22	C-C motif chemokine ligand 22	GO:0030593 neutrophil chemotaxis;GO:0048247 lymphocyte chemotaxis;GO:1990266 neutrophil migration					(M5883)NABA SECRETED FACTORS; (M5885)NABA MATRISOME ASSOCIATED; (M5889)NABA MATRISOME	(M5932)HALLMARK INFLAMMATORY RESPONSE; (M5950)HALLMARK ALLOGRAFT REJECTION	0	0	0	0	1	0	0	0	0	1	0	0	0	0	0	0	1	0	0	0
CCL5	6352	symbol	H. sapiens	6352	H. sapiens	CCL5	C-C motif chemokine ligand 5	GO:0010535 positive regulation of activation of JAK2 kinase activity;GO:0010536 positive regulation of activation of Janus kinase activity;GO:0010534 regulation of activation of JAK2 kinase activity				Heparin Disaccharide I-S (Receptor signaling protein tyrosine kinase activator activity);Heparin Disaccharide Iii-S (Receptor signaling protein tyrosine kinase activator activity)	(M165)PID SYNDECAN 4 PATHWAY; (M198)PID SYNDECAN 1 PATHWAY; (M254)PID MYC REPRESS PATHWAY	(M5950)HALLMARK ALLOGRAFT REJECTION; (M5921)HALLMARK COMPLEMENT; (M5913)HALLMARK INTERFERON GAMMA RESPONSE	0	0	0	0	1	1	0	0	0	1	1	0	0	0	0	0	1	1	0	0
CCNF	899	symbol	H. sapiens	899	H. sapiens	CCNF	cyclin F	GO:0010826 negative regulation of centrosome duplication;GO:0046606 negative regulation of centrosome cycle;GO:0010824 regulation of centrosome duplication			Centrosome			(M5901)HALLMARK G2M CHECKPOINT; (M5924)HALLMARK MTORC1 SIGNALING	0	0	0	0	0	0	0	0	0	0	0	0	0	0	0	0	0	0	0	0
CD177	57126	symbol	H. sapiens	57126	H. sapiens	CD177	CD177 molecule	GO:0007596 blood coagulation;GO:0050900 leukocyte migration;GO:0007599 hemostasis							0	0	0	0	0	0	0	0	1	0	0	0	1	0	0	0	0	0	0	0
CD274	29126	symbol	H. sapiens	29126	H. sapiens	CD274	CD274 molecule	GO:1905404 positive regulation of activated CD8-positive, alpha-beta T cell apoptotic process;GO:1905399 regulation of activated CD4-positive, alpha-beta T cell apoptotic process;GO:0046007 negative regulation of activated T cell proliferation		CD markers		Atezolizumab		(M5915)HALLMARK APICAL JUNCTION; (M5913)HALLMARK INTERFERON GAMMA RESPONSE	0	0	0	0	1	1	0	0	0	0	0	0	0	0	0	1	0	0	0	0
CD2BP2	10421	symbol	H. sapiens	10421	H. sapiens	CD2BP2	CD2 cytoplasmic tail binding protein 2	GO:0000244 spliceosomal tri-snRNP complex assembly;GO:0000387 spliceosomal snRNP assembly;GO:0010923 negative regulation of phosphatase activity			Nucleus				0	0	0	1	0	0	0	0	0	0	0	0	0	0	0	0	0	0	0	0
CD300LB	124599	symbol	H. sapiens	124599	H. sapiens	CD300LB	CD300 molecule like family member b	GO:0050776 regulation of immune response;GO:0045087 innate immune response;GO:0002682 regulation of immune system process		CD markers					0	0	0	0	0	0	0	0	0	0	0	0	0	0	0	0	1	0	0	0
CD38	952	symbol	H. sapiens	952	H. sapiens	CD38	CD38 molecule	GO:0045779 negative regulation of bone resorption;GO:0045907 positive regulation of vasoconstriction;GO:0060292 long term synaptic depression		CD markers;Enzymes/ENZYME proteins/{Hydrolases,Transferases}	Plasma membrane;Vesicles	Daratumumab (Transferase activity)		(M5897)HALLMARK IL6 JAK STAT3 SIGNALING; (M5902)HALLMARK APOPTOSIS; (M5913)HALLMARK INTERFERON GAMMA RESPONSE	0	0	0	0	1	1	0	0	0	0	1	0	0	0	0	0	0	1	0	0
CD59	966	symbol	H. sapiens	966	H. sapiens	CD59	CD59 molecule	GO:0001971 negative regulation of activation of membrane attack complex;GO:0001969 regulation of activation of membrane attack complex;GO:0042102 positive regulation of T cell proliferation		CD markers	Golgi apparatus;Vesicles			(M5921)HALLMARK COMPLEMENT; (M5930)HALLMARK EPITHELIAL MESENCHYMAL TRANSITION	0	0	0	0	0	1	0	0	1	1	0	0	1	1	0	0	1	0	0	0
CD7	924	symbol	H. sapiens	924	H. sapiens	CD7	CD7 molecule	GO:0048873 homeostasis of number of cells within a tissue;GO:0042110 T cell activation;GO:0070489 T cell aggregation		CD markers			(M8873)ST FAS SIGNALING PATHWAY	(M5950)HALLMARK ALLOGRAFT REJECTION	0	0	0	0	0	1	0	0	0	0	0	0	0	0	0	0	0	0	0	0
CD93	22918	symbol	H. sapiens	22918	H. sapiens	CD93	CD93 molecule	GO:0042116 macrophage activation;GO:0002274 myeloid leukocyte activation;GO:0006909 phagocytosis		CD markers					0	0	0	0	0	1	0	0	1	0	0	0	0	0	0	0	0	0	0	0
CDC34	997	symbol	H. sapiens	997	H. sapiens	CDC34	cell division cycle 34	GO:0043951 negative regulation of cAMP-mediated signaling;GO:0090261 positive regulation of inclusion body assembly;GO:0043949 regulation of cAMP-mediated signaling		Enzymes/ENZYME proteins/Transferases	Nucleus but not nucleoli			(M5941)HALLMARK UV RESPONSE UP	0	0	0	0	1	0	0	0	0	0	0	0	0	0	0	0	0	0	0	0
CDC42EP1	11135	symbol	H. sapiens	11135	H. sapiens	CDC42EP1	CDC42 effector protein 1	GO:0031274 positive regulation of pseudopodium assembly;GO:0031272 regulation of pseudopodium assembly;GO:0030838 positive regulation of actin filament polymerization			Cytoplasm;Cytoskeleton (Actin filaments)			(M5893)HALLMARK MITOTIC SPINDLE	0	0	0	0	0	0	0	0	0	0	0	0	0	0	0	0	0	0	0	0
CDC42EP4	23580	symbol	H. sapiens	23580	H. sapiens	CDC42EP4	CDC42 effector protein 4	GO:0031274 positive regulation of pseudopodium assembly;GO:0031272 regulation of pseudopodium assembly;GO:0030838 positive regulation of actin filament polymerization			Cytoskeleton (Actin filaments);Cytoskeleton (Microtubules)			(M5893)HALLMARK MITOTIC SPINDLE	0	0	0	0	0	0	0	0	0	0	0	0	0	0	0	0	0	0	0	0
CDCA7L	55536	symbol	H. sapiens	55536	H. sapiens	CDCA7L	cell division cycle associated 7 like	GO:0008284 positive regulation of cell proliferation;GO:0042127 regulation of cell proliferation;GO:0008283 cell proliferation			Nucleus;Nucleoli				0	0	0	0	0	0	0	0	0	0	0	0	0	0	0	0	0	0	0	0
CDCA8	55143	symbol	H. sapiens	55143	H. sapiens	CDCA8	cell division cycle associated 8	GO:0007080 mitotic metaphase plate congression;GO:0051310 metaphase plate congression;GO:0016925 protein sumoylation			Nucleus;Nucleoli;Cytoskeleton (Cytokinetic bridge)		(M14)PID AURORA B PATHWAY	(M5925)HALLMARK E2F TARGETS	0	0	0	0	0	0	0	0	0	0	0	0	0	0	0	0	0	0	0	0
CDH1	999	symbol	H. sapiens	999	H. sapiens	CDH1	cadherin 1	GO:0042993 positive regulation of transcription factor import into nucleus;GO:0071681 cellular response to indole-3-methanol;GO:0042990 regulation of transcription factor import into nucleus		CD markers	Plasma membrane		(M184)PID ECADHERIN KERATINOCYTE PATHWAY; (M72)PID NECTIN PATHWAY; (M156)PID ECADHERIN NASCENT AJ PATHWAY	(M5896)HALLMARK TGF BETA SIGNALING; (M5915)HALLMARK APICAL JUNCTION; (M5907)HALLMARK ESTROGEN RESPONSE LATE	0	0	0	0	0	1	0	0	0	0	0	0	0	0	0	0	0	0	0	0
CDK20	23552	symbol	H. sapiens	23552	H. sapiens	CDK20	cyclin dependent kinase 20	GO:0051301 cell division;GO:0051726 regulation of cell cycle;GO:0006468 protein phosphorylation	CMGC Ser/Thr protein kinase family	Enzymes/{ENZYME proteins/Transferases,Kinases/CMGC Ser/Thr protein kinases}	Nucleus but not nucleoli				0	0	0	0	0	0	0	0	0	0	0	0	0	0	0	0	0	0	0	0
CDK9	1025	symbol	H. sapiens	1025	H. sapiens	CDK9	cyclin dependent kinase 9	GO:1903839 positive regulation of mRNA 3'-UTR binding;GO:2001168 positive regulation of histone H2B ubiquitination;GO:1903837 regulation of mRNA 3'-UTR binding	CMGC Ser/Thr protein kinase family	Enzymes/{ENZYME proteins/Transferases,Kinases/CMGC Ser/Thr protein kinases}	Nucleus but not nucleoli;Vesicles	Flavopiridol (Transcription regulatory region dna binding)		(M5896)HALLMARK TGF BETA SIGNALING	0	0	0	1	1	0	0	0	0	0	0	0	0	0	0	0	0	0	0	0
CDKL1	8814	symbol	H. sapiens	8814	H. sapiens	CDKL1	cyclin dependent kinase like 1	GO:0007507 heart development;GO:0072359 circulatory system development;GO:0051726 regulation of cell cycle	CMGC Ser/Thr protein kinase family	Enzymes/{ENZYME proteins/Transferases,Kinases/CMGC Ser/Thr protein kinases}	Nucleus but not nucleoli;Vesicles				0	0	0	0	0	0	0	0	0	0	0	0	0	0	0	0	0	0	0	0
CDKL4	344387	symbol	H. sapiens	344387	H. sapiens	CDKL4	cyclin dependent kinase like 4	GO:0051726 regulation of cell cycle;GO:0006468 protein phosphorylation;GO:0016310 phosphorylation	CMGC Ser/Thr protein kinase family	Enzymes/{ENZYME proteins/Transferases,Kinases/CMGC Ser/Thr protein kinases}	Cytoplasm				0	0	0	0	0	0	0	0	0	0	0	0	0	0	0	0	0	0	0	0
CDKN2AIPNL	91368	symbol	H. sapiens	91368	H. sapiens	CDKN2AIPNL	CDKN2A interacting protein N-terminal like	GO:0006355 regulation of transcription, DNA-templated;GO:1903506 regulation of nucleic acid-templated transcription;GO:0006351 transcription, DNA-templated							0	0	0	0	0	0	0	0	0	0	0	0	0	0	0	0	0	0	0	0
CDKN2B	1030	symbol	H. sapiens	1030	H. sapiens	CDKN2B	cyclin dependent kinase inhibitor 2B	GO:0030511 positive regulation of transforming growth factor beta receptor signaling pathway;GO:1903846 positive regulation of cellular response to transforming growth factor beta stimulus;GO:2000134 negative regulation of G1/S transition of mitotic cell cycle			Nucleus but not nucleoli;Cytoplasm		(M254)PID MYC REPRESS PATHWAY; (M2)PID SMAD2 3NUCLEAR PATHWAY	(M5941)HALLMARK UV RESPONSE UP; (M5939)HALLMARK P53 PATHWAY	0	0	0	0	0	0	0	0	0	0	0	0	0	0	0	0	0	0	0	0
CDNF	441549	symbol	H. sapiens	441549	H. sapiens	CDNF	cerebral dopamine neurotrophic factor	GO:0071542 dopaminergic neuron differentiation;GO:0031175 neuron projection development;GO:0048666 neuron development							0	0	0	0	0	0	0	0	0	0	0	0	0	0	0	0	0	0	0	0
CDPF1	150383	symbol	H. sapiens	150383	H. sapiens	CDPF1	cysteine rich DPF motif domain containing 1				Cytoplasm				0	0	0	0	0	0	0	0	0	0	0	0	0	0	0	0	0	0	0	0
CECR5	27440	symbol	H. sapiens	27440	H. sapiens	CECR5	cat eye syndrome chromosome region, candidate 5	GO:0046474 glycerophospholipid biosynthetic process;GO:0045017 glycerolipid biosynthetic process;GO:0008654 phospholipid biosynthetic process			Mitochondria				0	1	0	0	0	0	0	0	0	0	0	0	0	0	0	0	0	0	1	0
CEND1	51286	symbol	H. sapiens	51286	H. sapiens	CEND1	cell cycle exit and neuronal differentiation 1	GO:0021686 cerebellar granular layer maturation;GO:0021941 negative regulation of cerebellar granule cell precursor proliferation;GO:0021702 cerebellar Purkinje cell differentiation			Mitochondria				0	0	0	0	0	0	0	0	0	0	0	0	0	0	0	0	0	0	0	0
CENPF	1063	symbol	H. sapiens	1063	H. sapiens	CENPF	centromere protein F	GO:0007094 mitotic spindle assembly checkpoint;GO:0071174 mitotic spindle checkpoint;GO:0045841 negative regulation of mitotic metaphase/anaphase transition			Nucleus but not nucleoli		(M176)PID FOXM1 PATHWAY	(M5901)HALLMARK G2M CHECKPOINT; (M5893)HALLMARK MITOTIC SPINDLE	0	0	0	0	0	0	0	0	0	0	0	0	0	0	0	0	0	0	0	0
CENPH	64946	symbol	H. sapiens	64946	H. sapiens	CENPH	centromere protein H	GO:0034080 CENP-A containing nucleosome assembly;GO:0006336 DNA replication-independent nucleosome assembly;GO:0051382 kinetochore assembly			Nucleus;Nucleoli				0	0	0	0	0	0	0	0	0	0	0	0	0	0	0	0	0	0	0	0
CER1	9350	symbol	H. sapiens	9350	H. sapiens	CER1	cerberus 1, DAN family BMP antagonist	GO:1900176 negative regulation of nodal signaling pathway involved in determination of lateral mesoderm left/right asymmetry;GO:1900146 negative regulation of nodal signaling pathway involved in determination of left/right asymmetry;GO:1900175 regulation of nodal signaling pathway involved in determination of lateral mesoderm left/right asymmetry					(M17761)ST WNT BETA CATENIN PATHWAY; (M181)PID BMP PATHWAY		0	0	0	0	0	0	0	0	0	0	0	0	0	0	0	0	0	0	0	0
CERS3	204219	symbol	H. sapiens	204219	H. sapiens	CERS3	ceramide synthase 3	GO:0046513 ceramide biosynthetic process;GO:0006672 ceramide metabolic process;GO:0030216 keratinocyte differentiation		Enzymes/ENZYME proteins/Transferases	Nucleus but not nucleoli				0	1	0	0	0	0	0	0	0	0	0	0	0	0	0	0	0	0	0	0
CERS4	79603	symbol	H. sapiens	79603	H. sapiens	CERS4	ceramide synthase 4	GO:0046513 ceramide biosynthetic process;GO:0006672 ceramide metabolic process;GO:0030148 sphingolipid biosynthetic process							0	1	0	0	0	0	0	0	0	0	0	0	0	0	0	0	0	0	0	0
CHAMP1	283489	symbol	H. sapiens	283489	H. sapiens	CHAMP1	chromosome alignment maintaining phosphoprotein 1	GO:0035372 protein localization to microtubule;GO:0051315 attachment of mitotic spindle microtubules to kinetochore;GO:0034501 protein localization to kinetochore			Nucleus but not nucleoli				0	0	0	0	0	0	0	0	0	0	0	0	0	0	0	0	0	0	0	0
CHERP	10523	symbol	H. sapiens	10523	H. sapiens	CHERP	calcium homeostasis endoplasmic reticulum protein	GO:0051533 positive regulation of NFAT protein import into nucleus;GO:0051209 release of sequestered calcium ion into cytosol;GO:0051532 regulation of NFAT protein import into nucleus			Nucleus but not nucleoli				0	0	0	0	0	0	0	0	0	0	0	0	0	0	0	0	0	1	0	0
CHMP1A	5119	symbol	H. sapiens	5119	H. sapiens	CHMP1A	charged multivesicular body protein 1A	GO:0045014 negative regulation of transcription by glucose;GO:1904903 ESCRT III complex disassembly;GO:0039702 viral budding via host ESCRT complex						(M5901)HALLMARK G2M CHECKPOINT	0	0	0	0	0	0	0	0	0	0	0	0	0	0	0	0	0	0	0	0
CHMP4C	92421	symbol	H. sapiens	92421	H. sapiens	CHMP4C	charged multivesicular body protein 4C	GO:1902188 positive regulation of viral release from host cell;GO:1902186 regulation of viral release from host cell;GO:0039702 viral budding via host ESCRT complex							0	0	0	0	0	0	0	0	0	0	0	0	0	0	0	0	0	0	0	0
CHORDC1	26973	symbol	H. sapiens	26973	H. sapiens	CHORDC1	cysteine and histidine rich domain containing 1	GO:2000299 negative regulation of Rho-dependent protein serine/threonine kinase activity;GO:2000298 regulation of Rho-dependent protein serine/threonine kinase activity;GO:0010824 regulation of centrosome duplication			Cytoplasm				0	0	0	0	0	0	0	0	0	0	0	0	0	0	0	0	0	0	0	0
CHRNA1	1134	symbol	H. sapiens	1134	H. sapiens	CHRNA1	cholinergic receptor nicotinic alpha 1 subunit	GO:0048630 skeletal muscle tissue growth;GO:0003009 skeletal muscle contraction;GO:0070050 neuron cellular homeostasis		Transporters/Transporter channels and pores	Plasma membrane	Galantamine (Ion channel activity);Agmatine (Ion channel activity)	(M175)PID ERBB2 ERBB3 PATHWAY	(M5909)HALLMARK MYOGENESIS	0	0	0	0	0	0	0	0	0	0	0	0	0	0	0	0	0	1	0	0
CHRNA2	1135	symbol	H. sapiens	1135	H. sapiens	CHRNA2	cholinergic receptor nicotinic alpha 2 subunit	GO:0007274 neuromuscular synaptic transmission;GO:0007271 synaptic transmission, cholinergic;GO:0035094 response to nicotine				Nicotine (Drug binding);Carbachol (Drug binding);Metocurine Iodide (Drug binding);Gallamine Triethiodide (Drug binding);Dextromethorphan (Drug binding);Cisatracurium besylate (Drug binding);Mecamylamine (Drug binding);Galantamine (Drug binding);Procaine (Drug binding);Rocuronium (Drug binding);Atracurium besylate (Drug binding);Biperiden (Drug binding);Ethanol (Drug binding);Doxacurium chloride (…			0	0	0	0	0	0	0	0	0	0	0	0	0	0	0	0	0	0	0	0
CHST10	9486	symbol	H. sapiens	9486	H. sapiens	CHST10	carbohydrate sulfotransferase 10	GO:0016051 carbohydrate biosynthetic process;GO:0044723 single-organism carbohydrate metabolic process;GO:0005975 carbohydrate metabolic process			Cytoplasm				0	0	0	0	0	0	1	0	0	0	0	0	0	0	0	0	0	0	0	0
CHST13	166012	symbol	H. sapiens	166012	H. sapiens	CHST13	carbohydrate sulfotransferase 13	GO:0030206 chondroitin sulfate biosynthetic process;GO:0050650 chondroitin sulfate proteoglycan biosynthetic process;GO:0030204 chondroitin sulfate metabolic process		Enzymes/ENZYME proteins/Transferases					0	0	0	0	0	0	1	1	0	0	0	0	0	0	0	0	0	0	0	1
CHST4	10164	symbol	H. sapiens	10164	H. sapiens	CHST4	carbohydrate sulfotransferase 4	GO:0006477 protein sulfation;GO:0016266 O-glycan processing;GO:0006044 N-acetylglucosamine metabolic process						(M5937)HALLMARK GLYCOLYSIS	0	0	0	0	0	0	1	0	0	1	0	0	0	0	0	0	0	0	0	1
CIAO1	9391	symbol	H. sapiens	9391	H. sapiens	CIAO1	cytosolic iron-sulfur assembly component 1	GO:0016226 iron-sulfur cluster assembly;GO:0031163 metallo-sulfur cluster assembly;GO:0051188 cofactor biosynthetic process			Nucleus but not nucleoli				0	0	0	0	0	0	0	0	0	0	0	0	0	0	0	0	0	0	0	0
CILP2	148113	symbol	H. sapiens	148113	H. sapiens	CILP2	cartilage intermediate layer protein 2						(M3008)NABA ECM GLYCOPROTEINS; (M5884)NABA CORE MATRISOME; (M5889)NABA MATRISOME		0	0	0	0	0	0	0	0	0	0	0	0	0	0	0	0	0	0	0	0
CKAP2	26586	symbol	H. sapiens	26586	H. sapiens	CKAP2	cytoskeleton associated protein 2	GO:0007026 negative regulation of microtubule depolymerization;GO:0031114 regulation of microtubule depolymerization;GO:1901880 negative regulation of protein depolymerization			Cytoplasm;Cytoskeleton (Microtubules)				0	0	0	0	0	0	0	0	0	0	0	0	0	0	0	0	0	0	0	0
CLCN1	1180	symbol	H. sapiens	1180	H. sapiens	CLCN1	chloride voltage-gated channel 1	GO:0019227 neuronal action potential propagation;GO:0098870 action potential propagation;GO:1903959 regulation of anion transmembrane transport		Transporters/Electrochemical Potential-driven transporters					0	0	0	0	0	0	0	0	0	0	0	0	0	0	1	0	0	0	0	0
CLCN6	1185	symbol	H. sapiens	1185	H. sapiens	CLCN6	chloride voltage-gated channel 6	GO:1903959 regulation of anion transmembrane transport;GO:0006884 cell volume homeostasis;GO:1902476 chloride transmembrane transport			Plasma membrane;Cytoplasm				0	0	0	0	0	0	0	0	0	0	0	0	0	0	1	0	0	1	0	0
CLDN22	53842	symbol	H. sapiens	53842	H. sapiens	CLDN22	claudin 22	GO:0016338 calcium-independent cell-cell adhesion via plasma membrane cell-adhesion molecules;GO:0098742 cell-cell adhesion via plasma-membrane adhesion molecules;GO:0098609 cell-cell adhesion		Transporters/Transporter channels and pores					0	0	0	0	0	0	0	0	0	0	0	0	0	0	0	0	0	0	0	0
CLDN4	1364	symbol	H. sapiens	1364	H. sapiens	CLDN4	claudin 4	GO:0061436 establishment of skin barrier;GO:0033561 regulation of water loss via skin;GO:0016338 calcium-independent cell-cell adhesion via plasma membrane cell-adhesion molecules		Transporters/Transporter channels and pores	Plasma membrane			(M5915)HALLMARK APICAL JUNCTION	0	0	0	0	0	0	0	0	0	0	0	0	1	0	0	0	0	0	0	0
CLEC11A	6320	symbol	H. sapiens	6320	H. sapiens	CLEC11A	C-type lectin domain family 11 member A	GO:0008284 positive regulation of cell proliferation;GO:0042127 regulation of cell proliferation;GO:0008283 cell proliferation			Centrosome		(M5880)NABA ECM AFFILIATED; (M5885)NABA MATRISOME ASSOCIATED; (M5889)NABA MATRISOME		0	0	0	0	0	0	0	0	0	0	0	0	0	0	0	0	0	0	0	0
CLIC2	1193	symbol	H. sapiens	1193	H. sapiens	CLIC2	chloride intracellular channel 2	GO:0060315 negative regulation of ryanodine-sensitive calcium-release channel activity;GO:0010881 regulation of cardiac muscle contraction by regulation of the release of sequestered calcium ion;GO:0051280 negative regulation of release of sequestered calcium ion into cytosol		Transporters/Transporter channels and pores				(M5945)HALLMARK HEME METABOLISM	0	0	0	0	0	0	0	0	0	0	0	0	0	0	1	0	0	1	0	0
CLN5	1203	symbol	H. sapiens	1203	H. sapiens	CLN5	ceroid-lipofuscinosis, neuronal 5	GO:0007042 lysosomal lumen acidification;GO:0035751 regulation of lysosomal lumen pH;GO:0007035 vacuolar acidification						(M5910)HALLMARK PROTEIN SECRETION	0	0	1	0	0	0	0	0	0	0	0	0	0	0	0	0	0	1	0	1
CLPB	81570	symbol	H. sapiens	81570	H. sapiens	CLPB	ClpB homolog, mitochondrial AAA ATPase chaperonin	GO:0034605 cellular response to heat;GO:0009408 response to heat;GO:0009266 response to temperature stimulus		Enzymes/ENZYME proteins/Hydrolases				(M5951)HALLMARK SPERMATOGENESIS	0	0	0	0	0	0	0	0	0	0	0	0	0	0	0	0	0	0	0	0
CLRN3	119467	symbol	H. sapiens	119467	H. sapiens	CLRN3	clarin 3			Transporters					0	0	0	0	0	0	0	0	0	0	0	0	0	0	0	0	0	0	0	0
CMBL	134147	symbol	H. sapiens	134147	H. sapiens	CMBL	carboxymethylenebutenolidase homolog	GO:0006805 xenobiotic metabolic process;GO:0071466 cellular response to xenobiotic stimulus;GO:0009410 response to xenobiotic stimulus						(M5905)HALLMARK ADIPOGENESIS	0	0	0	0	0	0	0	0	0	0	0	0	0	0	0	0	0	0	0	0
CMTM6	54918	symbol	H. sapiens	54918	H. sapiens	CMTM6	CKLF like MARVEL transmembrane domain containing 6	GO:0006935 chemotaxis;GO:0042330 taxis;GO:0040011 locomotion			Cytoplasm				0	0	0	0	0	0	0	0	1	0	0	0	0	0	0	0	0	0	0	0
CNDP1	84735	symbol	H. sapiens	84735	H. sapiens	CNDP1	carnosine dipeptidase 1	GO:0043171 peptide catabolic process;GO:1901565 organonitrogen compound catabolic process;GO:0006518 peptide metabolic process		Enzymes/{ENZYME proteins/Hydrolases,Peptidases/Metallopeptidases}					0	0	0	0	0	0	0	1	0	0	0	0	0	0	0	0	0	0	0	0
CNTN2	6900	symbol	H. sapiens	6900	H. sapiens	CNTN2	contactin 2	GO:0021853 cerebral cortex GABAergic interneuron migration;GO:0060168 positive regulation of adenosine receptor signaling pathway;GO:0021830 interneuron migration from the subpallium to the cortex		Transporters/Accessory Factors Involved in Transport					0	0	0	0	0	0	0	0	0	0	0	0	0	0	0	0	0	0	0	0
COA5	493753	symbol	H. sapiens	493753	H. sapiens	COA5	cytochrome c oxidase assembly factor 5	GO:0033617 mitochondrial respiratory chain complex IV assembly;GO:0008535 respiratory chain complex IV assembly;GO:0017004 cytochrome complex assembly			Mitochondria				0	0	0	0	0	0	0	0	0	0	0	0	0	0	0	0	0	0	0	0
COA7	65260	symbol	H. sapiens	65260	H. sapiens	COA7	cytochrome c oxidase assembly factor 7 (putative)				Nucleus;Mitochondria				0	0	0	0	0	0	0	0	0	0	0	0	0	0	0	0	0	0	0	0
COG2	22796	symbol	H. sapiens	22796	H. sapiens	COG2	component of oligomeric golgi complex 2	GO:0006891 intra-Golgi vesicle-mediated transport;GO:0007030 Golgi organization;GO:0006888 ER to Golgi vesicle-mediated transport						(M5910)HALLMARK PROTEIN SECRETION; (M5937)HALLMARK GLYCOLYSIS	0	0	0	0	0	0	0	0	0	0	0	0	0	0	0	0	0	0	0	0
COL4A4	1286	symbol	H. sapiens	1286	H. sapiens	COL4A4	collagen type IV alpha 4 chain	GO:0032836 glomerular basement membrane development;GO:0030574 collagen catabolic process;GO:0032835 glomerulus development					(M5887)NABA BASEMENT MEMBRANES; (M53)PID INTEGRIN3 PATHWAY; (M3005)NABA COLLAGENS		1	0	0	0	0	0	0	0	0	0	0	0	0	0	0	0	0	0	0	0
COLGALT1	79709	symbol	H. sapiens	79709	H. sapiens	COLGALT1	collagen beta(1-O)galactosyltransferase 1			Enzymes/ENZYME proteins/Transferases	Vesicles			(M5930)HALLMARK EPITHELIAL MESENCHYMAL TRANSITION	0	0	0	0	0	0	0	0	0	0	0	0	0	0	0	0	0	0	0	0
COMMD2	51122	symbol	H. sapiens	51122	H. sapiens	COMMD2	COMM domain containing 2	GO:0006355 regulation of transcription, DNA-templated;GO:1903506 regulation of nucleic acid-templated transcription;GO:0006351 transcription, DNA-templated			Nucleus but not nucleoli				0	0	0	0	0	0	0	0	0	0	0	0	0	0	0	0	0	0	0	0
COMMD9	29099	symbol	H. sapiens	29099	H. sapiens	COMMD9	COMM domain containing 9	GO:0006814 sodium ion transport;GO:0015672 monovalent inorganic cation transport;GO:0030001 metal ion transport			Nucleus				0	0	0	0	0	0	0	0	1	0	0	0	0	0	0	0	0	0	0	0
COMT	1312	symbol	H. sapiens	1312	H. sapiens	COMT	catechol-O-methyltransferase	GO:0050668 positive regulation of homocysteine metabolic process;GO:0031337 positive regulation of sulfur amino acid metabolic process;GO:0050666 regulation of homocysteine metabolic process		Enzymes/ENZYME proteins/Transferases	Vesicles	S-Adenosylmethionine (O-methyltransferase activity);Tolcapone (O-methyltransferase activity);Entacapone (O-methyltransferase activity);3,5-Dinitrocatechol (O-methyltransferase activity);2-Methoxyestradiol (O-methyltransferase activity);BIA (O-methyltransferase activity);N-{3-[5-(6-Amino-Purin-9-Yl)-3,4-Dihydroxy-Tetrahydro-Furan-2-Yl]-Allyl}-2,3-Dihydroxy-5-Nitro-Benzamide (O-methyltransferase ac…		(M5934)HALLMARK XENOBIOTIC METABOLISM	0	1	0	0	0	0	0	1	0	0	0	0	0	0	0	0	1	1	0	0
COMTD1	118881	symbol	H. sapiens	118881	H. sapiens	COMTD1	catechol-O-methyltransferase domain containing 1	GO:0032259 methylation;GO:0008152 metabolic process;GO:0008150 biological_process			Golgi apparatus	S-Adenosyl-L-Homocysteine (O-methyltransferase activity);Sinapoyl Coenzyme A (O-methyltransferase activity);Feruloyl Coenzyme A (O-methyltransferase activity)			0	0	0	0	0	0	0	0	0	0	0	0	0	0	0	0	0	0	0	0
COPRS	55352	symbol	H. sapiens	55352	H. sapiens	COPRS	coordinator of PRMT5 and differentiation stimulator	GO:0043985 histone H4-R3 methylation;GO:0034969 histone arginine methylation;GO:0018216 peptidyl-arginine methylation			Nucleus				0	0	0	0	0	0	0	0	0	0	0	0	0	0	0	0	0	0	0	0
COQ2	27235	symbol	H. sapiens	27235	H. sapiens	COQ2	coenzyme Q2, polyprenyltransferase	GO:0006071 glycerol metabolic process;GO:0006744 ubiquinone biosynthetic process;GO:0019400 alditol metabolic process		Enzymes/ENZYME proteins/Transferases	Cytoplasm				0	1	0	0	0	0	1	0	0	0	0	0	0	0	0	0	0	0	0	0
CORT	1325	symbol	H. sapiens	1325	H. sapiens	CORT	cortistatin	GO:0000712 resolution of meiotic recombination intermediates;GO:0051307 meiotic chromosome separation;GO:0031297 replication fork processing							0	0	0	0	0	0	0	0	0	0	0	0	0	0	0	0	0	0	0	0
COX10	1352	symbol	H. sapiens	1352	H. sapiens	COX10	COX10, heme A:farnesyltransferase cytochrome c oxidase assembly factor	GO:0006123 mitochondrial electron transport, cytochrome c to oxygen;GO:0048034 heme O biosynthetic process;GO:0006784 heme a biosynthetic process			Nucleoli;Mitochondria			(M5936)HALLMARK OXIDATIVE PHOSPHORYLATION	0	0	0	0	0	0	0	0	0	0	0	1	0	0	0	0	0	0	1	0
COX19	90639	symbol	H. sapiens	90639	H. sapiens	COX19	COX19, cytochrome c oxidase assembly factor	GO:0033617 mitochondrial respiratory chain complex IV assembly;GO:0008535 respiratory chain complex IV assembly;GO:0017004 cytochrome complex assembly			Cytoplasm				0	0	0	0	0	0	0	0	0	0	0	1	0	0	0	0	0	0	0	0
CPLX1	10815	symbol	H. sapiens	10815	H. sapiens	CPLX1	complexin 1	GO:0014047 glutamate secretion;GO:0016079 synaptic vesicle exocytosis;GO:0030073 insulin secretion							0	0	0	0	0	0	0	0	0	0	0	0	0	0	0	0	0	0	0	0
CPM	1368	symbol	H. sapiens	1368	H. sapiens	CPM	carboxypeptidase M	GO:0016485 protein processing;GO:0051604 protein maturation;GO:0006518 peptide metabolic process		Enzymes/{ENZYME proteins/Hydrolases,Peptidases/Metallopeptidases}				(M5921)HALLMARK COMPLEMENT	0	0	0	0	0	0	0	0	0	0	0	0	0	0	0	0	0	0	0	0
CPNE5	57699	symbol	H. sapiens	57699	H. sapiens	CPNE5	copine 5	GO:1903861 positive regulation of dendrite extension;GO:1903859 regulation of dendrite extension;GO:0097484 dendrite extension			Cytoplasm				0	0	0	0	0	0	0	0	0	0	0	0	0	0	0	0	0	0	0	0
CPPED1	55313	symbol	H. sapiens	55313	H. sapiens	CPPED1	calcineurin like phosphoesterase domain containing 1	GO:0006470 protein dephosphorylation;GO:0016311 dephosphorylation;GO:0006796 phosphate-containing compound metabolic process		Enzymes/ENZYME proteins/Hydrolases	Cytoplasm				0	0	0	0	0	0	0	0	1	0	0	0	0	0	0	0	0	0	0	0
CPT1A	1374	symbol	H. sapiens	1374	H. sapiens	CPT1A	carnitine palmitoyltransferase 1A	GO:0006853 carnitine shuttle;GO:0032000 positive regulation of fatty acid beta-oxidation;GO:0031998 regulation of fatty acid beta-oxidation		Enzymes/ENZYME proteins/Transferases	Mitochondria	L-Carnitine (Carnitine o-palmitoyltransferase activity);Glyburide (Carnitine o-palmitoyltransferase activity);Perhexiline (Carnitine o-palmitoyltransferase activity)	(M106)PID HNF3B PATHWAY	(M5935)HALLMARK FATTY ACID METABOLISM; (M5936)HALLMARK OXIDATIVE PHOSPHORYLATION	1	1	0	0	0	0	1	0	0	0	0	1	0	0	0	0	0	0	0	0
CRAT	1384	symbol	H. sapiens	1384	H. sapiens	CRAT	carnitine O-acetyltransferase	GO:0033540 fatty acid beta-oxidation using acyl-CoA oxidase;GO:0019254 carnitine metabolic process, CoA-linked;GO:0006635 fatty acid beta-oxidation		Enzymes/ENZYME proteins/Transferases;Transporters	Nucleus but not nucleoli;Nuclear membrane	L-Carnitine (Receptor binding);Coenzyme A (Receptor binding);(3-Carboxy-2-(R)-Hydroxy-Propyl)-Trimethyl-Ammonium (Receptor binding)		(M5949)HALLMARK PEROXISOME; (M5935)HALLMARK FATTY ACID METABOLISM; (M5915)HALLMARK APICAL JUNCTION	1	1	0	0	0	0	0	0	0	0	0	1	0	0	0	0	0	0	0	0
CREG1	8804	symbol	H. sapiens	8804	H. sapiens	CREG1	cellular repressor of E1A stimulated genes 1	GO:1903507 negative regulation of nucleic acid-templated transcription;GO:1902679 negative regulation of RNA biosynthetic process;GO:0051253 negative regulation of RNA metabolic process			Cytoskeleton (Microtubules)			(M5941)HALLMARK UV RESPONSE UP	0	0	0	0	0	0	0	0	1	0	0	1	0	0	0	0	0	0	0	0
CRISPLD2	83716	symbol	H. sapiens	83716	H. sapiens	CRISPLD2	cysteine rich secretory protein LCCL domain containing 2	GO:0060325 face morphogenesis;GO:0060323 head morphogenesis;GO:0060324 face development			Nucleus but not nucleoli		(M3008)NABA ECM GLYCOPROTEINS; (M5884)NABA CORE MATRISOME; (M5889)NABA MATRISOME		0	0	0	0	0	0	0	0	1	0	0	0	0	0	0	0	0	0	0	0
CRX	1406	symbol	H. sapiens	1406	H. sapiens	CRX	cone-rod homeobox	GO:0046534 positive regulation of photoreceptor cell differentiation;GO:0046532 regulation of photoreceptor cell differentiation;GO:0046530 photoreceptor cell differentiation		Transcription factors/Helix-turn-helix domains					0	0	0	0	0	0	0	0	0	0	0	0	0	0	0	0	0	0	0	0
CRYZ	1429	symbol	H. sapiens	1429	H. sapiens	CRYZ	crystallin zeta	GO:0042178 xenobiotic catabolic process;GO:0051289 protein homotetramerization;GO:0006805 xenobiotic metabolic process		Enzymes/ENZYME proteins/Oxidoreductases	Cytoplasm	Dicoumarol (Zinc ion binding);2'-Monophosphoadenosine 5'-Diphosphoribose (Zinc ion binding)		(M5935)HALLMARK FATTY ACID METABOLISM	0	0	0	0	0	0	0	0	0	0	0	1	0	0	0	0	0	0	0	0
CSRNP2	81566	symbol	H. sapiens	81566	H. sapiens	CSRNP2	cysteine and serine rich nuclear protein 2	GO:0010923 negative regulation of phosphatase activity;GO:0035305 negative regulation of dephosphorylation;GO:0010921 regulation of phosphatase activity		Transcription factors/Yet undefined DNA-binding domains				(M5939)HALLMARK P53 PATHWAY	0	0	0	0	0	0	0	0	0	0	0	0	0	0	0	0	0	0	0	0
CSRP1	1465	symbol	H. sapiens	1465	H. sapiens	CSRP1	cysteine and glycine rich protein 1	GO:0070527 platelet aggregation;GO:0034109 homotypic cell-cell adhesion;GO:0030168 platelet activation						(M5946)HALLMARK COAGULATION; (M5921)HALLMARK COMPLEMENT	0	0	0	0	0	1	0	0	0	0	0	0	1	0	0	0	0	0	0	0
CSTF2T	23283	symbol	H. sapiens	23283	H. sapiens	CSTF2T	cleavage stimulation factor subunit 2 tau variant	GO:0098789 pre-mRNA cleavage required for polyadenylation;GO:0098787 mRNA cleavage involved in mRNA processing;GO:0006379 mRNA cleavage			Nucleus but not nucleoli				0	0	0	0	0	0	0	0	0	0	0	0	0	0	0	0	0	0	0	0
CTSB	1508	symbol	H. sapiens	1508	H. sapiens	CTSB	cathepsin B	GO:0046697 decidualization;GO:0046718 viral entry into host cell;GO:0002224 toll-like receptor signaling pathway		Enzymes/{ENZYME proteins/Hydrolases,Peptidases/Cysteine-type peptidases}	Vesicles	2-Aminoethanimidic Acid (Proteoglycan binding);3-Amino-4-Oxybenzyl-2-Butanone (Proteoglycan binding);3-Methylphenylalanine (Proteoglycan binding);N-(3-Propylcarbamoyloxirane-2-Carbonyl)-Isoleucyl-Proline (Proteoglycan binding);2-Pyridinethiol (Proteoglycan binding);Diphenylacetic Acid (Proteoglycan binding);N-[1-Hydroxycarboxyethyl-Carbonyl]Leucylamino-2-Methyl-Butane (Proteoglycan binding);N-{[(…	(M3468)NABA ECM REGULATORS; (M5885)NABA MATRISOME ASSOCIATED; (M5889)NABA MATRISOME	(M5946)HALLMARK COAGULATION; (M5921)HALLMARK COMPLEMENT; (M5945)HALLMARK HEME METABOLISM	1	0	1	0	0	0	0	0	1	0	0	0	0	0	0	0	1	0	0	0
CTSD	1509	symbol	H. sapiens	1509	H. sapiens	CTSD	cathepsin D	GO:0019886 antigen processing and presentation of exogenous peptide antigen via MHC class II;GO:0030574 collagen catabolic process;GO:0002495 antigen processing and presentation of peptide antigen via MHC class II		Enzymes/{ENZYME proteins/Hydrolases,Peptidases/Aspartic-type peptidases}		Insulin Human (Aspartic-type endopeptidase activity);Insulin Pork (Aspartic-type endopeptidase activity);S-Methylcysteine (Aspartic-type endopeptidase activity);1h-Benoximidazole-2-Carboxylic Acid (Aspartic-type endopeptidase activity);N-Aminoethylmorpholine (Aspartic-type endopeptidase activity);5-AMINO-6-CYCLOHEXYL-4-HYDROXY-2-ISOBUTYL-HEXANOIC ACID (Aspartic-type endopeptidase activity);CYCLOH…	(M87)PID LKB1 PATHWAY; (M144)PID CERAMIDE PATHWAY; (M200)PID ERA GENOMIC PATHWAY	(M5921)HALLMARK COMPLEMENT; (M5939)HALLMARK P53 PATHWAY	1	0	1	0	0	0	0	0	1	0	0	0	0	0	0	0	0	0	0	0
CTSZ	1522	symbol	H. sapiens	1522	H. sapiens	CTSZ	cathepsin Z	GO:0002003 angiotensin maturation;GO:0002002 regulation of angiotensin levels in blood;GO:0001991 regulation of systemic arterial blood pressure by circulatory renin-angiotensin		Enzymes/{ENZYME proteins/Hydrolases,Peptidases/Cysteine-type peptidases}	Vesicles		(M3468)NABA ECM REGULATORS; (M5885)NABA MATRISOME ASSOCIATED; (M5889)NABA MATRISOME	(M5947)HALLMARK IL2 STAT5 SIGNALING	0	0	1	0	0	0	0	0	1	0	0	0	0	0	0	0	0	0	0	0
CTU1	90353	symbol	H. sapiens	90353	H. sapiens	CTU1	cytosolic thiouridylase subunit 1	GO:0002098 tRNA wobble uridine modification;GO:0034227 tRNA thio-modification;GO:0002097 tRNA wobble base modification							0	0	0	1	0	0	0	0	0	0	0	0	0	0	0	0	0	0	0	0
CUBN	8029	symbol	H. sapiens	8029	H. sapiens	CUBN	cubilin	GO:0015889 cobalamin transport;GO:0009235 cobalamin metabolic process;GO:0042359 vitamin D metabolic process				Hydroxocobalamin (Transporter activity)			0	1	0	0	0	0	0	0	0	0	0	0	0	0	0	0	0	0	0	0
CWC25	54883	symbol	H. sapiens	54883	H. sapiens	CWC25	CWC25 spliceosome associated protein homolog				Nucleus but not nucleoli				0	0	0	0	0	0	0	0	0	0	0	0	0	0	0	0	0	0	0	0
CXCL10	3627	symbol	H. sapiens	3627	H. sapiens	CXCL10	C-X-C motif chemokine ligand 10	GO:0051281 positive regulation of release of sequestered calcium ion into cytosol;GO:0051279 regulation of release of sequestered calcium ion into cytosol;GO:1901740 negative regulation of myoblast fusion				N-Methylleucine (Receptor binding)	(M222)PID CXCR3 PATHWAY; (M5883)NABA SECRETED FACTORS; (M5885)NABA MATRISOME ASSOCIATED	(M5897)HALLMARK IL6 JAK STAT3 SIGNALING; (M5911)HALLMARK INTERFERON ALPHA RESPONSE; (M5913)HALLMARK INTERFERON GAMMA RESPONSE	0	0	0	0	1	1	0	0	0	1	1	0	0	0	0	0	1	1	1	0
CXCL8	3576	symbol	H. sapiens	3576	H. sapiens	CXCL8	C-X-C motif chemokine ligand 8	GO:2000535 regulation of entry of bacterium into host cell;GO:0045091 regulation of single stranded viral RNA replication via double stranded DNA intermediate;GO:0035635 entry of bacterium into host cell				ABT-510 (Interleukin-8 receptor binding);MDX-018 (Interleukin-8 receptor binding);Rivanicline (Interleukin-8 receptor binding)	(M251)PID SYNDECAN 3 PATHWAY; (M252)PID IL8 CXCR1 PATHWAY; (M240)PID SYNDECAN 2 PATHWAY	(M5932)HALLMARK INFLAMMATORY RESPONSE; (M5930)HALLMARK EPITHELIAL MESENCHYMAL TRANSITION	0	0	0	0	1	1	0	0	0	1	0	0	0	0	0	0	1	0	0	0
CXCR1	3577	symbol	H. sapiens	3577	H. sapiens	CXCR1	C-X-C motif chemokine receptor 1	GO:0038112 interleukin-8-mediated signaling pathway;GO:0098759 cellular response to interleukin-8;GO:0098758 response to interleukin-8		CD markers;G-protein coupled receptors/{Chemokines and chemotactic factors receptors,GPCRs excl olfactory receptors}		Ketoprofen (Interleukin-8 receptor activity)	(M252)PID IL8 CXCR1 PATHWAY		0	0	0	0	1	0	0	0	1	1	0	0	0	0	0	0	0	0	0	0
CXXC1	30827	symbol	H. sapiens	30827	H. sapiens	CXXC1	CXXC finger protein 1	GO:0036498 IRE1-mediated unfolded protein response;GO:0051568 histone H3-K4 methylation;GO:0030968 endoplasmic reticulum unfolded protein response		Transcription factors/Zinc-coordinating DNA-binding domains	Nucleus			(M5922)HALLMARK UNFOLDED PROTEIN RESPONSE	0	0	0	0	0	0	0	0	0	0	0	0	0	0	0	0	0	0	0	0
CYB561	1534	symbol	H. sapiens	1534	H. sapiens	CYB561	cytochrome b561	GO:0022900 electron transport chain;GO:0006091 generation of precursor metabolites and energy;GO:0055085 transmembrane transport		Transporters/Transport Electron Carriers					0	0	0	0	0	0	0	0	0	0	0	1	0	0	0	0	0	0	0	0
CYB5R1	51706	symbol	H. sapiens	51706	H. sapiens	CYB5R1	cytochrome b5 reductase 1	GO:1903955 positive regulation of protein targeting to mitochondrion;GO:0002576 platelet degranulation;GO:1903214 regulation of protein targeting to mitochondrion		Enzymes/ENZYME proteins/Oxidoreductases	Nucleoli;Cytoplasm;Mitochondria	Flavin adenine dinucleotide (Cytochrome-b5 reductase activity, acting on nad(p)h)		(M5941)HALLMARK UV RESPONSE UP	0	1	0	0	0	0	0	0	0	0	0	1	0	0	0	0	0	0	0	0
CYBRD1	79901	symbol	H. sapiens	79901	H. sapiens	CYBRD1	cytochrome b reductase 1	GO:0006879 cellular iron ion homeostasis;GO:0055072 iron ion homeostasis;GO:0046916 cellular transition metal ion homeostasis			Cytoplasm;Golgi apparatus				0	0	0	0	0	0	0	0	0	0	0	1	0	0	1	0	0	1	0	0
CYCS	54205	symbol	H. sapiens	54205	H. sapiens	CYCS	cytochrome c, somatic	GO:0008635 activation of cysteine-type endopeptidase activity involved in apoptotic process by cytochrome c;GO:0006123 mitochondrial electron transport, cytochrome c to oxygen;GO:0006122 mitochondrial electron transport, ubiquinol to cytochrome c			Mitochondria	Minocycline (Metal ion binding);Protoporphyrin Ix Containing Co (Metal ion binding);Heme C (Metal ion binding);Protoporphyrin Ix Containing Zn (Metal ion binding);N-Trimethyllysine (Metal ion binding);Zinc Substituted Heme C (Metal ion binding)	(M197)PID HIV NEF PATHWAY; (M144)PID CERAMIDE PATHWAY; (M220)PID CASPASE PATHWAY	(M5936)HALLMARK OXIDATIVE PHOSPHORYLATION	0	0	0	0	0	0	0	0	0	0	0	1	0	0	0	0	0	0	1	0
CYGB	114757	symbol	H. sapiens	114757	H. sapiens	CYGB	cytoglobin	GO:2000490 negative regulation of hepatic stellate cell activation;GO:0032966 negative regulation of collagen biosynthetic process;GO:0010764 negative regulation of fibroblast migration			Nucleus but not nucleoli				1	1	0	0	0	1	0	0	0	0	0	1	0	0	0	0	0	0	0	0
CYP1B1	1545	symbol	H. sapiens	1545	H. sapiens	CYP1B1	cytochrome P450 family 1 subfamily B member 1	GO:0061304 retinal blood vessel morphogenesis;GO:0097267 omega-hydroxylase P450 pathway;GO:0071603 endothelial cell-cell adhesion		Enzymes/ENZYME proteins/Oxidoreductases		2-Methoxyestradiol (Oxygen binding)			1	1	0	0	0	1	0	0	0	0	0	1	0	0	0	1	0	0	0	0
CYP27A1	1593	symbol	H. sapiens	1593	H. sapiens	CYP27A1	cytochrome P450 family 27 subfamily A member 1	GO:0006699 bile acid biosynthetic process;GO:0008206 bile acid metabolic process;GO:0072330 monocarboxylic acid biosynthetic process		Enzymes/ENZYME proteins/Oxidoreductases	Mitochondria			(M5948)HALLMARK BILE ACID METABOLISM; (M5934)HALLMARK XENOBIOTIC METABOLISM	0	1	0	0	0	0	0	0	0	0	0	1	0	0	0	0	0	0	0	0
CYP2C18	1562	symbol	H. sapiens	1562	H. sapiens	CYP2C18	cytochrome P450 family 2 subfamily C member 18	GO:0019373 epoxygenase P450 pathway;GO:0019369 arachidonic acid metabolic process;GO:0001676 long-chain fatty acid metabolic process		Enzymes/ENZYME proteins/Oxidoreductases		4-METHYL-N-METHYL-N-(2-PHENYL-2H-PYRAZOL-3-YL)BENZENESULFONAMIDE (Steroid hydroxylase activity)	(M285)PID HNF3A PATHWAY	(M5934)HALLMARK XENOBIOTIC METABOLISM	0	1	0	0	0	0	0	0	0	0	0	1	0	0	0	0	0	0	0	0
CYP2E1	1571	symbol	H. sapiens	1571	H. sapiens	CYP2E1	cytochrome P450 family 2 subfamily E member 1	GO:0018885 carbon tetrachloride metabolic process;GO:0042196 chlorinated hydrocarbon metabolic process;GO:0018910 benzene metabolic process		Enzymes/ENZYME proteins/Oxidoreductases				(M5934)HALLMARK XENOBIOTIC METABOLISM	0	1	0	0	0	0	0	0	0	0	0	1	0	0	0	0	0	0	0	0
CYP39A1	51302	symbol	H. sapiens	51302	H. sapiens	CYP39A1	cytochrome P450 family 39 subfamily A member 1	GO:0030573 bile acid catabolic process;GO:0006707 cholesterol catabolic process;GO:0016127 sterol catabolic process		Enzymes/ENZYME proteins/Oxidoreductases				(M5948)HALLMARK BILE ACID METABOLISM; (M5956)HALLMARK KRAS SIGNALING DN	1	1	0	0	0	0	0	0	0	0	0	1	0	0	0	0	0	0	0	0
CYP7A1	1581	symbol	H. sapiens	1581	H. sapiens	CYP7A1	cytochrome P450 family 7 subfamily A member 1	GO:0070857 regulation of bile acid biosynthetic process;GO:0006707 cholesterol catabolic process;GO:1904251 regulation of bile acid metabolic process		Enzymes/ENZYME proteins/Oxidoreductases				(M5948)HALLMARK BILE ACID METABOLISM	1	1	0	0	0	0	0	0	0	0	0	1	0	0	0	0	0	1	0	0
CYSRT1	375791	symbol	H. sapiens	375791	H. sapiens	CYSRT1	cysteine rich tail 1				Nucleus but not nucleoli				0	0	0	0	0	0	0	0	0	0	0	0	0	0	0	0	0	0	0	0
CYTH4	27128	symbol	H. sapiens	27128	H. sapiens	CYTH4	cytohesin 4	GO:0032012 regulation of ARF protein signal transduction;GO:0032011 ARF protein signal transduction;GO:0046578 regulation of Ras protein signal transduction							0	0	0	0	0	0	0	0	0	0	0	0	0	0	0	0	0	0	0	0
DAGLB	221955	symbol	H. sapiens	221955	H. sapiens	DAGLB	diacylglycerol lipase beta	GO:0042136 neurotransmitter biosynthetic process;GO:0019369 arachidonic acid metabolic process;GO:0001676 long-chain fatty acid metabolic process					(M266)PID NCADHERIN PATHWAY		1	1	0	0	0	0	0	0	0	0	0	0	0	0	0	0	0	0	0	0
DAPK3	1613	symbol	H. sapiens	1613	H. sapiens	DAPK3	death associated protein kinase 3	GO:0043519 regulation of myosin II filament organization;GO:2001241 positive regulation of extrinsic apoptotic signaling pathway in absence of ligand;GO:0051893 regulation of focal adhesion assembly	CAMK Ser/Thr protein kinase family	Enzymes/{ENZYME proteins/Transferases,Kinases/CAMK Ser/Thr protein kinases}	Nucleus	2-(1,1-DIMETHYLETHYL)9-FLUORO-3,6-DIHYDRO-7H-BENZ[H]-IMIDAZ[4,5-F]ISOQUINOLIN-7-ONE (Rho gtpase binding);4-(6-{[(1R)-1-(hydroxymethyl)propyl]amino}imidazo[1,2-b]pyridazin-3-yl)benzoic acid (Rho gtpase binding);(4R)-7,8-dichloro-1',9-dimethyl-1-oxo-1,2,4,9-tetrahydrospiro[beta-carboline-3,4'-piperidine]-4-carbonitrile (Rho gtpase binding)			0	0	0	0	1	1	0	0	0	0	0	0	0	0	0	0	1	0	0	0
DARS2	55157	symbol	H. sapiens	55157	H. sapiens	DARS2	aspartyl-tRNA synthetase 2, mitochondrial	GO:0070145 mitochondrial asparaginyl-tRNA aminoacylation;GO:0006421 asparaginyl-tRNA aminoacylation;GO:0070127 tRNA aminoacylation for mitochondrial protein translation		Enzymes/ENZYME proteins/Ligase	Mitochondria	L-Aspartic Acid (Trna binding)			0	1	0	1	0	0	0	0	0	0	0	0	0	0	0	0	0	0	0	0
DBH	1621	symbol	H. sapiens	1621	H. sapiens	DBH	dopamine beta-hydroxylase	GO:0006589 octopamine biosynthetic process;GO:0042420 dopamine catabolic process;GO:0046333 octopamine metabolic process		Enzymes/ENZYME proteins/Oxidoreductases		Vitamin C (L-ascorbic acid binding);Disulfiram (L-ascorbic acid binding);Dopamine (L-ascorbic acid binding)			0	1	0	0	0	0	0	1	0	0	0	1	0	0	0	1	1	0	0	0
DCAKD	79877	symbol	H. sapiens	79877	H. sapiens	DCAKD	dephospho-CoA kinase domain containing	GO:0015937 coenzyme A biosynthetic process;GO:0034030 ribonucleoside bisphosphate biosynthetic process;GO:0034033 purine nucleoside bisphosphate biosynthetic process			Nucleus				0	0	0	0	0	0	0	0	0	0	0	0	0	0	0	0	0	0	1	1
DCK	1633	symbol	H. sapiens	1633	H. sapiens	DCK	deoxycytidine kinase	GO:0009157 deoxyribonucleoside monophosphate biosynthetic process;GO:0043097 pyrimidine nucleoside salvage;GO:0009162 deoxyribonucleoside monophosphate metabolic process		Enzymes/ENZYME proteins/Transferases	Nucleus	Fludarabine (Protein homodimerization activity);2'-Deoxycytidine (Protein homodimerization activity);CP-4055 (Protein homodimerization activity)		(M5925)HALLMARK E2F TARGETS	0	0	0	0	0	0	0	0	0	0	1	0	0	0	0	0	0	0	1	1
DCTN5	84516	symbol	H. sapiens	84516	H. sapiens	DCTN5	dynactin subunit 5	GO:0019886 antigen processing and presentation of exogenous peptide antigen via MHC class II;GO:0035904 aorta development;GO:0003281 ventricular septum development			Nucleus but not nucleoli;Nuclear membrane				0	0	0	0	0	0	0	0	0	0	0	0	0	0	0	0	0	0	0	0
DDOST	1650	symbol	H. sapiens	1650	H. sapiens	DDOST	dolichyl-diphosphooligosaccharide--protein glycosyltransferase non-catalytic subunit	GO:0018279 protein N-linked glycosylation via asparagine;GO:0042110 T cell activation;GO:0018196 peptidyl-asparagine modification		Enzymes/ENZYME proteins/Transferases	Endoplasmic reticulum				0	0	0	0	1	1	0	0	1	0	0	0	0	0	0	0	0	0	0	1
DDX21	9188	symbol	H. sapiens	9188	H. sapiens	DDX21	DExD-box helicase 21	GO:0043330 response to exogenous dsRNA;GO:0045815 positive regulation of gene expression, epigenetic;GO:0010501 RNA secondary structure unwinding		Enzymes/ENZYME proteins/Hydrolases	Nucleoli			(M5941)HALLMARK UV RESPONSE UP; (M5926)HALLMARK MYC TARGETS V1	0	0	0	1	0	0	0	0	0	0	0	0	0	0	0	0	1	0	0	0
DDX28	55794	symbol	H. sapiens	55794	H. sapiens	DDX28	DEAD-box helicase 28	GO:1902775 mitochondrial large ribosomal subunit assembly;GO:0061668 mitochondrial ribosome assembly;GO:0000027 ribosomal large subunit assembly		Enzymes/ENZYME proteins/Hydrolases	Cytoplasm;Mitochondria				0	0	0	1	0	0	0	0	0	0	0	0	0	0	0	0	0	0	0	0
DEFB1	1672	symbol	H. sapiens	1672	H. sapiens	DEFB1	defensin beta 1	GO:0060474 positive regulation of flagellated sperm motility involved in capacitation;GO:1902093 positive regulation of flagellated sperm motility;GO:0048240 sperm capacitation		Transporters/Transporter channels and pores					0	0	0	0	0	0	0	0	0	1	0	0	0	1	0	0	1	0	0	0
DET1	55070	symbol	H. sapiens	55070	H. sapiens	DET1	de-etiolated homolog 1 (Arabidopsis)				Nucleus but not nucleoli;Cytoskeleton (Microtubules)				0	0	0	0	0	0	0	0	0	0	0	0	0	0	0	0	0	0	0	0
DGAT2L6	347516	symbol	H. sapiens	347516	H. sapiens	DGAT2L6	diacylglycerol O-acyltransferase 2 like 6	GO:0036155 acylglycerol acyl-chain remodeling;GO:0006639 acylglycerol metabolic process;GO:0006638 neutral lipid metabolic process							0	1	0	0	0	0	0	0	0	0	0	0	0	0	0	0	0	0	0	0
DHCR7	1717	symbol	H. sapiens	1717	H. sapiens	DHCR7	7-dehydrocholesterol reductase	GO:0033489 cholesterol biosynthetic process via desmosterol;GO:0033490 cholesterol biosynthetic process via lathosterol;GO:0045540 regulation of cholesterol biosynthetic process		Enzymes/ENZYME proteins/Oxidoreductases	Endoplasmic reticulum	NADH (7-dehydrocholesterol reductase activity)		(M5892)HALLMARK CHOLESTEROL HOMEOSTASIS; (M5907)HALLMARK ESTROGEN RESPONSE LATE; (M5906)HALLMARK ESTROGEN RESPONSE EARLY	0	1	0	0	0	0	0	0	0	0	0	1	0	0	0	0	0	0	0	0
DHH	50846	symbol	H. sapiens	50846	H. sapiens	DHH	desert hedgehog	GO:0033327 Leydig cell differentiation;GO:0030238 male sex determination;GO:0007286 spermatid development					(M211)PID HEDGEHOG 2PATHWAY; (M5883)NABA SECRETED FACTORS; (M5885)NABA MATRISOME ASSOCIATED		0	1	0	0	0	0	0	0	0	0	0	0	0	0	0	0	0	0	0	0
DHX37	57647	symbol	H. sapiens	57647	H. sapiens	DHX37	DEAH-box helicase 37	GO:0006364 rRNA processing;GO:0016072 rRNA metabolic process;GO:0034470 ncRNA processing		Enzymes/ENZYME proteins/Hydrolases	Nuclear membrane				0	0	0	1	0	0	0	0	0	0	0	0	0	0	0	0	0	0	0	0
DHX58	79132	symbol	H. sapiens	79132	H. sapiens	DHX58	DExH-box helicase 58	GO:0039534 negative regulation of MDA-5 signaling pathway;GO:1900245 positive regulation of MDA-5 signaling pathway;GO:0039536 negative regulation of RIG-I signaling pathway		Enzymes/ENZYME proteins/Hydrolases				(M5911)HALLMARK INTERFERON ALPHA RESPONSE; (M5913)HALLMARK INTERFERON GAMMA RESPONSE	0	0	0	0	0	0	0	0	0	1	0	0	0	0	0	1	1	0	0	0
DIEXF	27042	symbol	H. sapiens	27042	H. sapiens	DIEXF	digestive organ expansion factor homolog (zebrafish)	GO:0000462 maturation of SSU-rRNA from tricistronic rRNA transcript (SSU-rRNA, 5.8S rRNA, LSU-rRNA);GO:0030490 maturation of SSU-rRNA;GO:0042274 ribosomal small subunit biogenesis			Nucleus but not nucleoli				0	0	0	1	0	0	0	0	0	0	0	0	0	0	0	0	0	0	0	0
DIO1	1733	symbol	H. sapiens	1733	H. sapiens	DIO1	iodothyronine deiodinase 1	GO:0006590 thyroid hormone generation;GO:0042403 thyroid hormone metabolic process;GO:0042446 hormone biosynthetic process		Enzymes/ENZYME proteins/Oxidoreductases	Vesicles			(M5949)HALLMARK PEROXISOME; (M5948)HALLMARK BILE ACID METABOLISM	0	0	0	0	0	0	0	0	0	0	0	1	0	0	0	0	0	0	0	0
DIRAS1	148252	symbol	H. sapiens	148252	H. sapiens	DIRAS1	DIRAS family GTPase 1	GO:0043406 positive regulation of MAP kinase activity;GO:0071902 positive regulation of protein serine/threonine kinase activity;GO:0043405 regulation of MAP kinase activity							0	0	0	0	0	0	0	0	0	0	0	0	0	0	0	0	0	0	0	0
DIRAS2	54769	symbol	H. sapiens	54769	H. sapiens	DIRAS2	DIRAS family GTPase 2	GO:0043406 positive regulation of MAP kinase activity;GO:0071902 positive regulation of protein serine/threonine kinase activity;GO:0043405 regulation of MAP kinase activity							0	0	0	0	0	0	0	0	0	0	0	0	0	0	0	0	0	0	0	0
DKC1	1736	symbol	H. sapiens	1736	H. sapiens	DKC1	dyskerin pseudouridine synthase 1	GO:0000495 box H/ACA snoRNA 3'-end processing;GO:1904851 positive regulation of establishment of protein localization to telomere;GO:0090669 telomerase RNA stabilization			Nucleus;Nucleoli		(M105)PID TELOMERASE PATHWAY	(M5922)HALLMARK UNFOLDED PROTEIN RESPONSE; (M5901)HALLMARK G2M CHECKPOINT	0	0	0	1	0	0	0	0	0	0	0	0	0	0	0	0	0	0	0	0
DNAAF2	55172	symbol	H. sapiens	55172	H. sapiens	DNAAF2	dynein axonemal assembly factor 2	GO:0071973 bacterial-type flagellum-dependent cell motility;GO:0097588 archaeal or bacterial-type flagellum-dependent cell motility;GO:0070286 axonemal dynein complex assembly			Cytoplasm				0	0	0	0	0	0	0	0	0	0	0	0	0	0	0	0	0	0	0	0
DNAJC11	55735	symbol	H. sapiens	55735	H. sapiens	DNAJC11	DnaJ heat shock protein family (Hsp40) member C11				Cytoplasm				0	0	0	0	0	0	0	0	0	0	0	0	0	0	0	0	0	0	0	0
DNAJC18	202052	symbol	H. sapiens	202052	H. sapiens	DNAJC18	DnaJ heat shock protein family (Hsp40) member C18				Cell Junctions				0	0	0	0	0	0	0	0	0	0	0	0	0	0	0	0	0	0	0	0
DNAJC27	51277	symbol	H. sapiens	51277	H. sapiens	DNAJC27	DnaJ heat shock protein family (Hsp40) member C27	GO:0071701 regulation of MAPK export from nucleus;GO:0045204 MAPK export from nucleus;GO:0046825 regulation of protein export from nucleus			Cytoplasm				0	0	0	0	0	0	0	0	0	0	0	0	0	0	0	0	0	0	0	0
DNAJC30	84277	symbol	H. sapiens	84277	H. sapiens	DNAJC30	DnaJ heat shock protein family (Hsp40) member C30								0	0	0	0	0	0	0	0	0	0	0	0	0	0	0	0	0	0	0	0
DNALI1	7802	symbol	H. sapiens	7802	H. sapiens	DNALI1	dynein axonemal light intermediate chain 1	GO:0007338 single fertilization;GO:0009566 fertilization;GO:0019953 sexual reproduction							0	0	0	0	0	0	0	0	0	0	0	0	0	0	0	0	0	0	0	0
DNASE1	1773	symbol	H. sapiens	1773	H. sapiens	DNASE1	deoxyribonuclease 1	GO:0006308 DNA catabolic process;GO:0034655 nucleobase-containing compound catabolic process;GO:0090305 nucleic acid phosphodiester bond hydrolysis		Enzymes/ENZYME proteins/Hydrolases	Vesicles				0	0	0	0	0	0	0	0	0	0	0	0	0	0	0	0	0	0	0	0
DOHH	83475	symbol	H. sapiens	83475	H. sapiens	DOHH	deoxyhypusine hydroxylase/monooxygenase	GO:0008612 peptidyl-lysine modification to peptidyl-hypusine;GO:0018205 peptidyl-lysine modification;GO:0018193 peptidyl-amino acid modification		Enzymes/ENZYME proteins/Oxidoreductases	Nucleus;Cytoplasm				0	0	0	0	0	0	0	0	0	0	0	1	0	0	0	0	0	0	0	0
DONSON	29980	symbol	H. sapiens	29980	H. sapiens	DONSON	downstream neighbor of SON	GO:0033260 nuclear DNA replication;GO:0044786 cell cycle DNA replication;GO:0006261 DNA-dependent DNA replication			Nucleus but not nucleoli;Cell Junctions			(M5925)HALLMARK E2F TARGETS	0	0	0	0	0	0	0	0	0	0	0	0	0	0	0	0	0	0	0	0
DPH5	51611	symbol	H. sapiens	51611	H. sapiens	DPH5	diphthamide biosynthesis 5	GO:0017183 peptidyl-diphthamide biosynthetic process from peptidyl-histidine;GO:0017182 peptidyl-diphthamide metabolic process;GO:0018202 peptidyl-histidine modification		Enzymes/ENZYME proteins/Transferases		S-Adenosyl-L-Homocysteine (Diphthine synthase activity)			0	0	0	0	0	0	0	0	0	0	0	0	0	0	0	0	0	0	0	0
DPH6	89978	symbol	H. sapiens	89978	H. sapiens	DPH6	diphthamine biosynthesis 6	GO:0017183 peptidyl-diphthamide biosynthetic process from peptidyl-histidine;GO:1903955 positive regulation of protein targeting to mitochondrion;GO:0017182 peptidyl-diphthamide metabolic process		Enzymes/ENZYME proteins/Ligase	Nucleoli				0	0	0	0	0	0	0	0	0	0	0	0	0	0	0	0	0	0	0	0
DPP7	29952	symbol	H. sapiens	29952	H. sapiens	DPP7	dipeptidyl peptidase 7	GO:0006508 proteolysis;GO:0019538 protein metabolic process;GO:0043170 macromolecule metabolic process		Enzymes/{ENZYME proteins/Hydrolases,Peptidases/Serine-type peptidases}	Golgi apparatus;Vesicles				0	0	0	0	0	0	0	0	1	0	0	0	0	0	0	0	0	0	0	0
DQX1	165545	symbol	H. sapiens	165545	H. sapiens	DQX1	DEAQ-box RNA dependent ATPase 1	GO:0000398 mRNA splicing, via spliceosome;GO:0000377 RNA splicing, via transesterification reactions with bulged adenosine as nucleophile;GO:0000375 RNA splicing, via transesterification reactions		Enzymes/ENZYME proteins/Hydrolases	Plasma membrane;Cytoplasm				0	0	0	0	0	0	0	0	0	0	0	0	0	0	0	0	0	0	0	0
DRAM1	55332	symbol	H. sapiens	55332	H. sapiens	DRAM1	DNA damage regulated autophagy modulator 1	GO:0010506 regulation of autophagy;GO:0006914 autophagy;GO:0006915 apoptotic process						(M5939)HALLMARK P53 PATHWAY; (M5890)HALLMARK TNFA SIGNALING VIA NFKB	0	0	0	0	0	0	0	0	0	0	0	0	0	0	0	0	0	0	0	0
DRG2	1819	symbol	H. sapiens	1819	H. sapiens	DRG2	developmentally regulated GTP binding protein 2	GO:0007165 signal transduction;GO:0044700 single organism signaling;GO:0023052 signaling			Nucleus but not nucleoli;Cytoplasm;Vesicles				0	0	0	0	0	0	0	0	0	0	0	0	0	0	0	0	0	0	0	0
DSG3	1830	symbol	H. sapiens	1830	H. sapiens	DSG3	desmoglein 3	GO:0007156 homophilic cell adhesion via plasma membrane adhesion molecules;GO:0098742 cell-cell adhesion via plasma-membrane adhesion molecules;GO:0098609 cell-cell adhesion							0	0	0	0	0	0	0	0	0	0	0	0	0	0	0	0	0	0	0	0
DSTYK	25778	symbol	H. sapiens	25778	H. sapiens	DSTYK	dual serine/threonine and tyrosine protein kinase	GO:0045743 positive regulation of fibroblast growth factor receptor signaling pathway;GO:0040036 regulation of fibroblast growth factor receptor signaling pathway;GO:0070374 positive regulation of ERK1 and ERK2 cascade	Other	Enzymes/{ENZYME proteins/Transferases,Kinases}	Nucleus but not nucleoli;Cytoskeleton (Intermediate filaments)				0	0	0	0	0	0	0	0	0	0	0	0	0	0	0	0	0	0	0	0
DTD2	112487	symbol	H. sapiens	112487	H. sapiens	DTD2	D-tyrosyl-tRNA deacylase 2 (putative)	GO:0019478 D-amino acid catabolic process;GO:0046416 D-amino acid metabolic process;GO:0006450 regulation of translational fidelity			Vesicles				1	1	0	1	0	0	0	1	0	0	0	0	0	0	0	0	0	0	0	0
DUSP26	78986	symbol	H. sapiens	78986	H. sapiens	DUSP26	dual specificity phosphatase 26	GO:1902310 positive regulation of peptidyl-serine dephosphorylation;GO:0044387 negative regulation of protein kinase activity by regulation of protein phosphorylation;GO:1902308 regulation of peptidyl-serine dephosphorylation		Enzymes/ENZYME proteins/Hydrolases					0	0	0	0	0	1	0	0	0	0	0	0	0	0	0	0	0	0	0	0
DVL1	1855	symbol	H. sapiens	1855	H. sapiens	DVL1	dishevelled segment polarity protein 1	GO:0090179 planar cell polarity pathway involved in neural tube closure;GO:1905386 positive regulation of protein localization to presynapse;GO:0090178 regulation of establishment of planar polarity involved in neural tube closure			Nucleoli		(M31)PID BETA CATENIN DEG PATHWAY; (M90)PID WNT CANONICAL PATHWAY; (M23)PID WNT NONCANONICAL PATHWAY		0	0	0	0	0	0	0	0	0	1	0	0	0	0	0	0	0	0	0	0
DYNC1H1	1778	symbol	H. sapiens	1778	H. sapiens	DYNC1H1	dynein cytoplasmic 1 heavy chain 1	GO:0034063 stress granule assembly;GO:0019886 antigen processing and presentation of exogenous peptide antigen via MHC class II;GO:0033962 cytoplasmic mRNA processing body assembly			Cytoplasm;Centrosome		(M163)PID LIS1 PATHWAY	(M5893)HALLMARK MITOTIC SPINDLE	0	0	0	1	0	0	0	0	1	0	0	0	0	0	0	0	0	0	0	0
DZANK1	55184	symbol	H. sapiens	55184	H. sapiens	DZANK1	double zinc ribbon and ankyrin repeat domains 1								0	0	0	0	0	0	0	0	0	0	0	0	0	0	0	0	0	0	0	0
EBI3	10148	symbol	H. sapiens	10148	H. sapiens	EBI3	Epstein-Barr virus induced 3	GO:0046641 positive regulation of alpha-beta T cell proliferation;GO:0046640 regulation of alpha-beta T cell proliferation;GO:0046635 positive regulation of alpha-beta T cell activation					(M36)PID IL27 PATHWAY; (M5883)NABA SECRETED FACTORS; (M5885)NABA MATRISOME ASSOCIATED	(M5897)HALLMARK IL6 JAK STAT3 SIGNALING; (M5932)HALLMARK INFLAMMATORY RESPONSE	0	0	0	0	1	1	0	0	0	0	0	0	0	0	0	1	0	0	0	0
ECHDC1	55862	symbol	H. sapiens	55862	H. sapiens	ECHDC1	ethylmalonyl-CoA decarboxylase 1	GO:0008152 metabolic process;GO:0008150 biological_process		Enzymes/ENZYME proteins/Lyases					0	0	0	0	0	0	0	0	0	0	0	0	0	0	0	0	0	0	0	0
ECHS1	1892	symbol	H. sapiens	1892	H. sapiens	ECHS1	enoyl-CoA hydratase, short chain 1	GO:0006635 fatty acid beta-oxidation;GO:0009062 fatty acid catabolic process;GO:0019395 fatty acid oxidation		Enzymes/ENZYME proteins/Lyases	Mitochondria	Hexanoyl-Coenzyme A (Enoyl-coa hydratase activity);Octanoyl-Coenzyme A (Enoyl-coa hydratase activity);Acetoacetyl-Coenzyme A (Enoyl-coa hydratase activity);4-(N,N-Dimethylamino)Cinnamoyl-Coa (Enoyl-coa hydratase activity)		(M5935)HALLMARK FATTY ACID METABOLISM; (M5905)HALLMARK ADIPOGENESIS; (M5936)HALLMARK OXIDATIVE PHOSPHORYLATION	1	1	0	0	0	0	0	0	0	0	0	1	0	0	0	0	0	0	0	0
EDNRA	1909	symbol	H. sapiens	1909	H. sapiens	EDNRA	endothelin receptor type A	GO:0007190 activation of adenylate cyclase activity;GO:0045762 positive regulation of adenylate cyclase activity;GO:0014824 artery smooth muscle contraction		G-protein coupled receptors/GPCRs excl olfactory receptors	Cytoplasm	Bosentan (Phosphatidylinositol phospholipase c activity);Acetylsalicylic acid (Phosphatidylinositol phospholipase c activity);2-HYDROXY-3,5-DIIODOBENZOIC ACID (Phosphatidylinositol phospholipase c activity);Darusentan (Phosphatidylinositol phospholipase c activity);PS433540 (Phosphatidylinositol phospholipase c activity);SPP 301 (Phosphatidylinositol phospholipase c activity);Actelion-1 (Phosphat…	(M8)PID ENDOTHELIN PATHWAY		0	0	0	0	0	0	0	0	0	0	0	0	0	0	0	0	0	1	1	1
EEF1A1	1915	symbol	H. sapiens	1915	H. sapiens	EEF1A1	eukaryotic translation elongation factor 1 alpha 1	GO:1904714 regulation of chaperone-mediated autophagy;GO:0061684 chaperone-mediated autophagy;GO:0071364 cellular response to epidermal growth factor stimulus			Cytoplasm	Guanosine-5'-Diphosphate (Trna binding)			0	0	0	0	0	0	0	0	1	0	0	0	0	0	0	0	0	0	0	0
EEF2	1938	symbol	H. sapiens	1938	H. sapiens	EEF2	eukaryotic translation elongation factor 2	GO:1990416 cellular response to brain-derived neurotrophic factor stimulus;GO:2000767 positive regulation of cytoplasmic translation;GO:0051593 response to folic acid			Plasma membrane;Cytoplasm	Adenosine-5-Diphosphoribose (Translation elongation factor activity);Diphthamide (Translation elongation factor activity);Guanosine-5'-Diphosphate (Translation elongation factor activity);N~2~,N~2~-DIMETHYL-N~1~-(6-OXO-5,6-DIHYDROPHENANTHRIDIN-2-YL)GLYCINAMIDE (Translation elongation factor activity)	(M121)PID MTOR 4PATHWAY	(M5922)HALLMARK UNFOLDED PROTEIN RESPONSE	0	0	0	0	0	0	0	0	1	0	0	0	0	0	0	0	0	0	0	0
EFHD1	80303	symbol	H. sapiens	80303	H. sapiens	EFHD1	EF-hand domain family member D1	GO:0031175 neuron projection development;GO:0048666 neuron development;GO:0030182 neuron differentiation			Golgi apparatus			(M5956)HALLMARK KRAS SIGNALING DN	0	0	0	0	0	0	0	0	0	0	0	0	0	0	0	0	0	0	0	0
EFNA2	1943	symbol	H. sapiens	1943	H. sapiens	EFNA2	ephrin A2	GO:0021772 olfactory bulb development;GO:0021988 olfactory lobe development;GO:0030316 osteoclast differentiation		RAS pathway related proteins			(M177)PID EPHA FWDPATHWAY		0	0	0	0	0	0	0	0	0	0	0	0	0	0	0	0	0	0	0	0
EHD1	10938	symbol	H. sapiens	10938	H. sapiens	EHD1	EH domain containing 1	GO:2001137 positive regulation of endocytic recycling;GO:0010886 positive regulation of cholesterol storage;GO:1901741 positive regulation of myoblast fusion						(M5890)HALLMARK TNFA SIGNALING VIA NFKB; (M5921)HALLMARK COMPLEMENT	0	0	0	0	0	0	0	0	0	0	0	0	1	0	0	0	0	0	0	0
EHD2	30846	symbol	H. sapiens	30846	H. sapiens	EHD2	EH domain containing 2	GO:2001137 positive regulation of endocytic recycling;GO:1901741 positive regulation of myoblast fusion;GO:1901739 regulation of myoblast fusion							0	0	0	0	0	0	0	0	0	0	0	0	1	0	0	0	0	0	0	0
EID1	23741	symbol	H. sapiens	23741	H. sapiens	EID1	EP300 interacting inhibitor of differentiation 1	GO:0035065 regulation of histone acetylation;GO:2000756 regulation of peptidyl-lysine acetylation;GO:1901983 regulation of protein acetylation			Nucleus but not nucleoli				0	0	0	0	0	0	0	0	0	0	0	0	0	0	0	0	0	0	0	0
EID2	163126	symbol	H. sapiens	163126	H. sapiens	EID2	EP300 interacting inhibitor of differentiation 2	GO:0007181 transforming growth factor beta receptor complex assembly;GO:0030512 negative regulation of transforming growth factor beta receptor signaling pathway;GO:0007183 SMAD protein complex assembly			Nucleus but not nucleoli				0	0	0	0	0	0	0	0	0	0	0	0	0	0	0	0	0	0	0	0
EID2B	126272	symbol	H. sapiens	126272	H. sapiens	EID2B	EP300 interacting inhibitor of differentiation 2B	GO:0007517 muscle organ development;GO:0061061 muscle structure development;GO:0006355 regulation of transcription, DNA-templated							0	0	0	0	0	0	0	0	0	0	0	0	0	0	0	0	0	0	0	0
EIF1AX	1964	symbol	H. sapiens	1964	H. sapiens	EIF1AX	eukaryotic translation initiation factor 1A, X-linked	GO:0006413 translational initiation;GO:0006412 translation;GO:0043043 peptide biosynthetic process			Cytoplasm			(M5926)HALLMARK MYC TARGETS V1	0	0	0	0	0	0	0	0	0	0	0	0	0	0	0	0	0	0	0	0
EIF2B1	1967	symbol	H. sapiens	1967	H. sapiens	EIF2B1	eukaryotic translation initiation factor 2B subunit alpha	GO:0019509 L-methionine biosynthetic process from methylthioadenosine;GO:0071267 L-methionine salvage;GO:0071265 L-methionine biosynthetic process			Cytoplasm				0	1	0	0	0	0	0	0	0	0	0	0	0	0	0	0	0	0	0	0
EIF2S3	1968	symbol	H. sapiens	1968	H. sapiens	EIF2S3	eukaryotic translation initiation factor 2 subunit gamma	GO:0001731 formation of translation preinitiation complex;GO:0006413 translational initiation;GO:0022618 ribonucleoprotein complex assembly				Guanosine-5'-Diphosphate (Translation initiation factor activity)		(M5941)HALLMARK UV RESPONSE UP	0	0	0	1	0	0	0	0	0	0	0	0	0	0	1	0	0	0	0	0
ELANE	1991	symbol	H. sapiens	1991	H. sapiens	ELANE	elastase, neutrophil expressed	GO:0070947 neutrophil mediated killing of fungus;GO:1903238 positive regulation of leukocyte tethering or rolling;GO:0070943 neutrophil mediated killing of symbiont cell		Enzymes/{ENZYME proteins/Hydrolases,Peptidases/Serine-type peptidases}		Pegfilgrastim (Serine-type endopeptidase activity);Alpha-1-proteinase inhibitor (Serine-type endopeptidase activity);Filgrastim (Serine-type endopeptidase activity);Mdl 101,146 (Serine-type endopeptidase activity);ONO-6818 (Serine-type endopeptidase activity);Elafin (Serine-type endopeptidase activity)	(M174)PID UPA UPAR PATHWAY; (M195)PID CMYB PATHWAY; (M3468)NABA ECM REGULATORS	(M5950)HALLMARK ALLOGRAFT REJECTION	0	0	0	0	0	1	0	0	1	1	0	0	0	1	0	1	1	1	0	0
ELFN1	392617	symbol	H. sapiens	392617	H. sapiens	ELFN1	extracellular leucine rich repeat and fibronectin type III domain containing 1	GO:0010923 negative regulation of phosphatase activity;GO:0035305 negative regulation of dephosphorylation;GO:0010921 regulation of phosphatase activity					(M5880)NABA ECM AFFILIATED; (M5885)NABA MATRISOME ASSOCIATED; (M5889)NABA MATRISOME		0	0	0	0	0	0	0	0	0	0	0	0	0	0	0	0	0	0	0	0
EMC10	284361	symbol	H. sapiens	284361	H. sapiens	EMC10	ER membrane protein complex subunit 10				Nucleus				0	0	0	0	0	0	0	0	0	0	0	0	0	0	0	0	0	0	0	0
EML5	161436	symbol	H. sapiens	161436	H. sapiens	EML5	echinoderm microtubule associated protein like 5	GO:0008150 biological_process							0	0	0	0	0	0	0	0	0	0	0	0	0	0	0	0	0	0	0	0
ENDOD1	23052	symbol	H. sapiens	23052	H. sapiens	ENDOD1	endonuclease domain containing 1	GO:0090305 nucleic acid phosphodiester bond hydrolysis;GO:0090304 nucleic acid metabolic process;GO:0006139 nucleobase-containing compound metabolic process			Nuclear membrane			(M5906)HALLMARK ESTROGEN RESPONSE EARLY; (M5945)HALLMARK HEME METABOLISM	0	0	0	0	0	0	0	0	0	0	0	0	0	0	0	0	0	0	0	0
ENGASE	64772	symbol	H. sapiens	64772	H. sapiens	ENGASE	endo-beta-N-acetylglucosaminidase	GO:0006491 N-glycan processing;GO:0006517 protein deglycosylation;GO:0006487 protein N-linked glycosylation		Enzymes/ENZYME proteins/Hydrolases	Cytoplasm;Centrosome				0	0	0	0	0	0	1	0	0	0	0	0	0	0	0	0	0	0	0	1
ENO4	387712	symbol	H. sapiens	387712	H. sapiens	ENO4	enolase family member 4	GO:0006096 glycolytic process;GO:0006757 ATP generation from ADP;GO:0046031 ADP metabolic process			Nucleus				1	1	0	0	0	0	1	0	0	0	0	0	0	0	0	0	0	0	1	0
ENPP4	22875	symbol	H. sapiens	22875	H. sapiens	ENPP4	ectonucleotide pyrophosphatase/phosphodiesterase 4 (putative)	GO:0046130 purine ribonucleoside catabolic process;GO:0030194 positive regulation of blood coagulation;GO:0006152 purine nucleoside catabolic process		Enzymes/ENZYME proteins/Hydrolases					1	0	0	0	0	0	0	1	1	1	1	0	1	0	0	0	0	0	1	0
ENTPD4	9583	symbol	H. sapiens	9583	H. sapiens	ENTPD4	ectonucleoside triphosphate diphosphohydrolase 4	GO:0006256 UDP catabolic process;GO:0009195 pyrimidine ribonucleoside diphosphate catabolic process;GO:0009222 pyrimidine ribonucleotide catabolic process		Enzymes/ENZYME proteins/Hydrolases	Vesicles				1	0	1	0	0	0	0	1	0	0	1	0	0	0	0	0	0	0	1	0
ENTPD7	57089	symbol	H. sapiens	57089	H. sapiens	ENTPD7	ectonucleoside triphosphate diphosphohydrolase 7							(M5956)HALLMARK KRAS SIGNALING DN	0	0	0	0	0	0	0	0	0	0	0	0	0	0	0	0	0	0	0	0
ENTPD8	377841	symbol	H. sapiens	377841	H. sapiens	ENTPD8	ectonucleoside triphosphate diphosphohydrolase 8	GO:0009133 nucleoside diphosphate biosynthetic process;GO:0009124 nucleoside monophosphate biosynthetic process;GO:0009132 nucleoside diphosphate metabolic process		Enzymes/ENZYME proteins/Hydrolases	Nucleus but not nucleoli;Cytoplasm				0	0	0	0	0	0	0	0	0	0	1	0	0	0	0	0	0	0	1	0
EPN3	55040	symbol	H. sapiens	55040	H. sapiens	EPN3	epsin 3				Vesicles				0	0	0	0	0	0	0	0	0	0	0	0	0	0	0	0	0	0	0	0
EPOR	2057	symbol	H. sapiens	2057	H. sapiens	EPOR	erythropoietin receptor	GO:0038162 erythropoietin-mediated signaling pathway;GO:0036018 cellular response to erythropoietin;GO:0046697 decidualization				Darbepoetin alfa (Identical protein binding);Erythropoietin (Identical protein binding);3,5 DIBROMOTYROSINE (Identical protein binding);Peginesatide (Identical protein binding);Epoetin Zeta (Identical protein binding)	(M233)PID EPO PATHWAY; (M231)PID KIT PATHWAY	(M5945)HALLMARK HEME METABOLISM	0	0	0	0	1	0	0	0	0	0	0	0	0	0	0	0	0	0	0	0
ERCC6L	54821	symbol	H. sapiens	54821	H. sapiens	ERCC6L	ERCC excision repair 6 like, spindle assembly checkpoint helicase	GO:0007062 sister chromatid cohesion;GO:0000819 sister chromatid segregation;GO:0007067 mitotic nuclear division		Enzymes/ENZYME proteins/Hydrolases	Centrosome		(M129)PID PLK1 PATHWAY		0	0	0	0	0	0	0	0	0	0	0	0	0	0	0	0	0	0	0	0
ERI1	90459	symbol	H. sapiens	90459	H. sapiens	ERI1	exoribonuclease 1	GO:0071044 histone mRNA catabolic process;GO:0000467 exonucleolytic trimming to generate mature 3'-end of 5.8S rRNA from tricistronic rRNA transcript (SSU-rRNA, 5.8S rRNA, LSU-rRNA);GO:0000459 exonucleolytic trimming involved in rRNA processing							0	0	0	1	0	0	0	0	0	0	0	0	0	0	0	0	0	0	0	0
ETNK2	55224	symbol	H. sapiens	55224	H. sapiens	ETNK2	ethanolamine kinase 2	GO:0006646 phosphatidylethanolamine biosynthetic process;GO:0046337 phosphatidylethanolamine metabolic process;GO:0046474 glycerophospholipid biosynthetic process		Enzymes/ENZYME proteins/Transferases					0	1	0	0	0	0	0	0	0	0	0	0	0	0	0	0	0	0	1	0
EXOC2	55770	symbol	H. sapiens	55770	H. sapiens	EXOC2	exocyst complex component 2	GO:2000535 regulation of entry of bacterium into host cell;GO:0035635 entry of bacterium into host cell;GO:0001927 exocyst assembly		RAS pathway related proteins	Vesicles		(M16)PID INSULIN PATHWAY; (M67)PID ARF6 TRAFFICKING PATHWAY	(M5922)HALLMARK UNFOLDED PROTEIN RESPONSE	0	0	0	0	0	0	0	0	0	0	0	0	0	0	0	0	0	0	0	0
EXOC8	149371	symbol	H. sapiens	149371	H. sapiens	EXOC8	exocyst complex component 8	GO:0001927 exocyst assembly;GO:0051601 exocyst localization;GO:0022617 extracellular matrix disassembly			Cytoplasm				0	0	0	0	0	0	0	0	0	0	0	0	0	0	0	0	0	0	0	0
EZH1	2145	symbol	H. sapiens	2145	H. sapiens	EZH1	enhancer of zeste 1 polycomb repressive complex 2 subunit	GO:0070734 histone H3-K27 methylation;GO:0021766 hippocampus development;GO:0021543 pallium development		Enzymes/ENZYME proteins/Transferases	Nucleus but not nucleoli			(M5945)HALLMARK HEME METABOLISM	0	0	0	0	0	0	0	0	0	0	0	0	0	0	0	0	0	0	0	0
F12	2161	symbol	H. sapiens	2161	H. sapiens	F12	coagulation factor XII	GO:0051919 positive regulation of fibrinolysis;GO:0002542 Factor XII activation;GO:0051917 regulation of fibrinolysis		Enzymes/{ENZYME proteins/Hydrolases,Peptidases/Serine-type peptidases}		C1 Esterase Inhibitor (Human) (Serine-type endopeptidase activity);Ethanolamine Oleate (Serine-type endopeptidase activity);C1 Esterase Inhibitor (Recombinant) (Serine-type endopeptidase activity)	(M3468)NABA ECM REGULATORS; (M5885)NABA MATRISOME ASSOCIATED; (M5889)NABA MATRISOME	(M5946)HALLMARK COAGULATION	0	0	0	0	0	0	0	0	0	1	0	0	1	1	0	0	1	0	0	0
F13B	2165	symbol	H. sapiens	2165	H. sapiens	F13B	coagulation factor XIII B chain	GO:0007596 blood coagulation;GO:0007599 hemostasis;GO:0050817 coagulation					(M3468)NABA ECM REGULATORS; (M5885)NABA MATRISOME ASSOCIATED; (M5889)NABA MATRISOME	(M5946)HALLMARK COAGULATION	0	0	0	0	0	0	0	0	0	0	0	0	1	0	0	0	0	0	0	0
F2RL2	2151	symbol	H. sapiens	2151	H. sapiens	F2RL2	coagulation factor II thrombin receptor like 2	GO:0051482 positive regulation of cytosolic calcium ion concentration involved in phospholipase C-activating G-protein coupled signaling pathway;GO:0035025 positive regulation of Rho protein signal transduction;GO:0070493 thrombin-activated receptor signaling pathway		G-protein coupled receptors/GPCRs excl olfactory receptors			(M138)PID THROMBIN PAR4 PATHWAY; (M15743)ST GA12 PATHWAY; (M193)PID NEPHRIN NEPH1 PATHWAY	(M5946)HALLMARK COAGULATION; (M5947)HALLMARK IL2 STAT5 SIGNALING	0	0	0	0	0	1	0	0	0	0	0	0	1	0	0	0	0	1	0	0
F2RL3	9002	symbol	H. sapiens	9002	H. sapiens	F2RL3	F2R like thrombin/trypsin receptor 3	GO:0051281 positive regulation of release of sequestered calcium ion into cytosol;GO:0051279 regulation of release of sequestered calcium ion into cytosol;GO:0051209 release of sequestered calcium ion into cytosol		G-protein coupled receptors/GPCRs excl olfactory receptors			(M138)PID THROMBIN PAR4 PATHWAY; (M15743)ST GA12 PATHWAY		0	0	0	0	0	1	0	0	0	0	0	0	1	0	0	0	0	1	0	0
F9	2158	symbol	H. sapiens	2158	H. sapiens	F9	coagulation factor IX	GO:0007598 blood coagulation, extrinsic pathway;GO:0007597 blood coagulation, intrinsic pathway;GO:0017187 peptidyl-glutamic acid carboxylation		Enzymes/{ENZYME proteins/Hydrolases,Peptidases/Serine-type peptidases}		Antihemophilic Factor (Recombinant) (Serine-type endopeptidase activity);Menadione (Serine-type endopeptidase activity);TTP889 (Serine-type endopeptidase activity)	(M3468)NABA ECM REGULATORS; (M5885)NABA MATRISOME ASSOCIATED; (M5889)NABA MATRISOME	(M5946)HALLMARK COAGULATION	0	0	0	0	0	0	0	0	0	0	0	0	1	0	0	0	0	0	0	0
FADD	8772	symbol	H. sapiens	8772	H. sapiens	FADD	Fas associated via death domain	GO:2000454 positive regulation of CD8-positive, alpha-beta cytotoxic T cell extravasation;GO:2000452 regulation of CD8-positive, alpha-beta cytotoxic T cell extravasation;GO:2000451 positive regulation of CD8-positive, alpha-beta T cell extravasation			Nucleus but not nucleoli;Cytoplasm		(M79)PID TRAIL PATHWAY; (M18030)ST TUMOR NECROSIS FACTOR PATHWAY; (M197)PID HIV NEF PATHWAY		0	0	0	0	1	1	0	0	0	0	0	0	0	0	0	1	1	0	0	0
FADS2	9415	symbol	H. sapiens	9415	H. sapiens	FADS2	fatty acid desaturase 2	GO:0036109 alpha-linolenic acid metabolic process;GO:0043651 linoleic acid metabolic process;GO:0006636 unsaturated fatty acid biosynthetic process		Enzymes/ENZYME proteins/Oxidoreductases		Alpha-Linolenic Acid (Stearoyl-coa 9-desaturase activity)		(M5892)HALLMARK CHOLESTEROL HOMEOSTASIS; (M5948)HALLMARK BILE ACID METABOLISM; (M5924)HALLMARK MTORC1 SIGNALING	0	1	0	0	0	0	0	0	0	0	0	1	0	0	0	0	0	0	0	0
FADS6	283985	symbol	H. sapiens	283985	H. sapiens	FADS6	fatty acid desaturase 6	GO:0006633 fatty acid biosynthetic process;GO:0072330 monocarboxylic acid biosynthetic process;GO:0006631 fatty acid metabolic process							0	1	0	0	0	0	0	0	0	0	0	1	0	0	0	0	0	0	0	0
FAM101A	144347	gene_synonym	H. sapiens	144347	H. sapiens	RFLNA	refilin A	GO:1900158 negative regulation of bone mineralization involved in bone maturation;GO:1900157 regulation of bone mineralization involved in bone maturation;GO:0061182 negative regulation of chondrocyte development							0	0	0	0	0	0	0	0	0	0	0	0	0	0	0	0	0	0	0	0
FAM101B	359845	gene_synonym	H. sapiens	359845	H. sapiens	RFLNB	refilin B	GO:1900158 negative regulation of bone mineralization involved in bone maturation;GO:1900157 regulation of bone mineralization involved in bone maturation;GO:0061182 negative regulation of chondrocyte development			Cytoplasm;Cytoskeleton (Actin filaments)				0	0	0	0	0	0	0	0	0	0	0	0	0	0	0	0	0	0	0	0
FAM102B	284611	symbol	H. sapiens	284611	H. sapiens	FAM102B	family with sequence similarity 102 member B				Nucleoli;Cytoplasm				0	0	0	0	0	0	0	0	0	0	0	0	0	0	0	0	0	0	0	0
FAM163B	642968	symbol	H. sapiens	642968	H. sapiens	FAM163B	family with sequence similarity 163 member B				Nucleus but not nucleoli;Cytoplasm				0	0	0	0	0	0	0	0	0	0	0	0	0	0	0	0	0	0	0	0
FAM174B	400451	symbol	H. sapiens	400451	H. sapiens	FAM174B	family with sequence similarity 174 member B				Cytoskeleton (Intermediate filaments)				0	0	0	0	0	0	0	0	0	0	0	0	0	0	0	0	0	0	0	0
FAM175A	84142	symbol	H. sapiens	84142	H. sapiens	FAM175A	family with sequence similarity 175 member A	GO:0031572 G2 DNA damage checkpoint;GO:0045739 positive regulation of DNA repair;GO:0006303 double-strand break repair via nonhomologous end joining			Nucleus		(M84)PID ATM PATHWAY		0	0	0	0	0	0	0	0	0	0	0	0	0	0	0	0	0	0	0	0
FAM206A	54942	symbol	H. sapiens	54942	H. sapiens	FAM206A	family with sequence similarity 206 member A				Nucleus but not nucleoli				0	0	0	0	0	0	0	0	0	0	0	0	0	0	0	0	0	0	0	0
FAM207A	85395	symbol	H. sapiens	85395	H. sapiens	FAM207A	family with sequence similarity 207 member A				Golgi apparatus;Vesicles				0	0	0	0	0	0	0	0	0	0	0	0	0	0	0	0	0	0	0	0
FAM20C	56975	symbol	H. sapiens	56975	H. sapiens	FAM20C	FAM20C, golgi associated secretory pathway kinase	GO:0036179 osteoclast maturation;GO:0097187 dentinogenesis;GO:0071895 odontoblast differentiation		Enzymes/ENZYME proteins/Transferases	Nucleus but not nucleoli		(M3468)NABA ECM REGULATORS; (M5885)NABA MATRISOME ASSOCIATED; (M5889)NABA MATRISOME		0	0	0	0	0	0	0	0	0	0	0	0	0	0	0	0	0	0	1	0
FAM228A	653140	symbol	H. sapiens	653140	H. sapiens	FAM228A	family with sequence similarity 228 member A								0	0	0	0	0	0	0	0	0	0	0	0	0	0	0	0	0	0	0	0
FAM32A	26017	symbol	H. sapiens	26017	H. sapiens	FAM32A	family with sequence similarity 32 member A	GO:0006915 apoptotic process;GO:0012501 programmed cell death;GO:0008219 cell death			Nucleus				0	0	0	0	0	0	0	0	0	0	0	0	0	0	0	0	0	0	0	0
FAM53B	9679	symbol	H. sapiens	9679	H. sapiens	FAM53B	family with sequence similarity 53 member B	GO:0008150 biological_process			Cytoplasm				0	0	0	0	0	0	0	0	0	0	0	0	0	0	0	0	0	0	0	0
FAM69A	388650	symbol	H. sapiens	388650	H. sapiens	FAM69A	family with sequence similarity 69 member A				Cytoplasm				0	0	0	0	0	0	0	0	0	0	0	0	0	0	0	0	0	0	0	0
FAM89A	375061	symbol	H. sapiens	375061	H. sapiens	FAM89A	family with sequence similarity 89 member A				Golgi apparatus;Vesicles				0	0	0	0	0	0	0	0	0	0	0	0	0	0	0	0	0	0	0	0
FAS	355	symbol	H. sapiens	355	H. sapiens	FAS	Fas cell surface death receptor	GO:0045060 negative thymic T cell selection;GO:0097296 activation of cysteine-type endopeptidase activity involved in apoptotic signaling pathway;GO:0043383 negative T cell selection		CD markers	Plasma membrane;Cytoplasm		(M5060)SA FAS SIGNALING; (M7997)SA CASPASE CASCADE; (M197)PID HIV NEF PATHWAY	(M5897)HALLMARK IL6 JAK STAT3 SIGNALING; (M5902)HALLMARK APOPTOSIS; (M5950)HALLMARK ALLOGRAFT REJECTION	0	0	0	0	1	1	0	0	0	1	0	0	0	0	0	0	1	0	0	0
FASN	2194	symbol	H. sapiens	2194	H. sapiens	FASN	fatty acid synthase	GO:0035338 long-chain fatty-acyl-CoA biosynthetic process;GO:0046949 fatty-acyl-CoA biosynthetic process;GO:0015939 pantothenate metabolic process		Enzymes/ENZYME proteins/{Hydrolases,Lyases,Oxidoreductases,Transferases}	Cytoplasm	Cerulenin (Poly(a) rna binding);Orlistat (Poly(a) rna binding)	(M236)PID DELTA NP63 PATHWAY; (M19)PID P73PATHWAY	(M5892)HALLMARK CHOLESTEROL HOMEOSTASIS; (M5935)HALLMARK FATTY ACID METABOLISM; (M5906)HALLMARK ESTROGEN RESPONSE EARLY	0	1	0	0	1	0	0	0	0	0	0	1	0	0	0	0	0	0	0	0
FBXL22	283807	symbol	H. sapiens	283807	H. sapiens	FBXL22	F-box and leucine rich repeat protein 22	GO:0043161 proteasome-mediated ubiquitin-dependent protein catabolic process;GO:0010498 proteasomal protein catabolic process;GO:0006511 ubiquitin-dependent protein catabolic process							0	0	0	0	0	0	0	0	0	0	0	0	0	0	0	0	0	0	0	0
FBXO21	23014	symbol	H. sapiens	23014	H. sapiens	FBXO21	F-box protein 21	GO:0006511 ubiquitin-dependent protein catabolic process;GO:0019941 modification-dependent protein catabolic process;GO:0051603 proteolysis involved in cellular protein catabolic process			Mitochondria				0	0	0	0	0	0	0	0	0	0	0	0	0	0	0	0	0	0	0	0
FBXO31	79791	symbol	H. sapiens	79791	H. sapiens	FBXO31	F-box protein 31	GO:0031571 mitotic G1 DNA damage checkpoint;GO:0044819 mitotic G1/S transition checkpoint;GO:0031145 anaphase-promoting complex-dependent catabolic process			Nucleus but not nucleoli				0	0	0	0	0	0	0	0	0	0	0	0	0	0	0	0	0	0	0	0
FBXO42	54455	symbol	H. sapiens	54455	H. sapiens	FBXO42	F-box protein 42				Nucleus but not nucleoli				0	0	0	0	0	0	0	0	0	0	0	0	0	0	0	0	0	0	0	0
FDFT1	2222	symbol	H. sapiens	2222	H. sapiens	FDFT1	farnesyl-diphosphate farnesyltransferase 1	GO:0045338 farnesyl diphosphate metabolic process;GO:0006696 ergosterol biosynthetic process;GO:0008204 ergosterol metabolic process		Enzymes/ENZYME proteins/Transferases	Endoplasmic reticulum	TAK-475 (Squalene synthase activity)		(M5892)HALLMARK CHOLESTEROL HOMEOSTASIS; (M5907)HALLMARK ESTROGEN RESPONSE LATE; (M5906)HALLMARK ESTROGEN RESPONSE EARLY	0	1	0	0	0	0	0	0	0	0	0	1	0	0	0	0	0	0	0	0
FEM1A	55527	symbol	H. sapiens	55527	H. sapiens	FEM1A	fem-1 homolog A	GO:0051438 regulation of ubiquitin-protein transferase activity;GO:0050728 negative regulation of inflammatory response;GO:0031396 regulation of protein ubiquitination			Nucleus;Golgi apparatus				0	0	0	0	0	0	0	0	0	1	0	0	0	0	0	0	0	0	0	0
FFAR3	2865	symbol	H. sapiens	2865	H. sapiens	FFAR3	free fatty acid receptor 3	GO:2001275 positive regulation of glucose import in response to insulin stimulus;GO:0002879 positive regulation of acute inflammatory response to non-antigenic stimulus;GO:2001273 regulation of glucose import in response to insulin stimulus		G-protein coupled receptors/GPCRs excl olfactory receptors					0	0	0	0	0	0	0	0	0	1	0	0	0	1	0	1	1	0	0	0
FGD2	221472	symbol	H. sapiens	221472	H. sapiens	FGD2	FYVE, RhoGEF and PH domain containing 2	GO:0043507 positive regulation of JUN kinase activity;GO:0043506 regulation of JUN kinase activity;GO:0046330 positive regulation of JNK cascade							0	0	0	0	0	0	0	0	0	0	0	0	0	0	0	0	0	0	0	0
FGF23	8074	symbol	H. sapiens	8074	H. sapiens	FGF23	fibroblast growth factor 23	GO:0042369 vitamin D catabolic process;GO:0010980 positive regulation of vitamin D 24-hydroxylase activity;GO:0090080 positive regulation of MAPKKK cascade by fibroblast growth factor receptor signaling pathway		RAS pathway related proteins			(M276)PID FGF PATHWAY; (M5883)NABA SECRETED FACTORS; (M5885)NABA MATRISOME ASSOCIATED		1	1	0	0	1	0	0	0	0	0	0	0	0	0	0	0	0	1	1	0
FIG4	9896	symbol	H. sapiens	9896	H. sapiens	FIG4	FIG4 phosphoinositide 5-phosphatase	GO:0031642 negative regulation of myelination;GO:0036092 phosphatidylinositol-3-phosphate biosynthetic process;GO:0032288 myelin assembly			Vesicles				0	1	0	0	0	0	0	0	0	0	0	0	0	0	0	0	0	0	1	0
FITM2	128486	symbol	H. sapiens	128486	H. sapiens	FITM2	fat storage inducing transmembrane protein 2	GO:0010890 positive regulation of sequestering of triglyceride;GO:0035356 cellular triglyceride homeostasis;GO:0010866 regulation of triglyceride biosynthetic process							0	1	0	0	0	0	0	0	0	0	0	0	0	0	0	0	0	1	1	0
FKBP5	2289	symbol	H. sapiens	2289	H. sapiens	FKBP5	FK506 binding protein 5	GO:0000413 protein peptidyl-prolyl isomerization;GO:0018208 peptidyl-proline modification;GO:0061077 chaperone-mediated protein folding		Enzymes/ENZYME proteins/Isomerase	Nucleus but not nucleoli		(M115)PID REG GR PATHWAY	(M5908)HALLMARK ANDROGEN RESPONSE; (M5907)HALLMARK ESTROGEN RESPONSE LATE; (M5906)HALLMARK ESTROGEN RESPONSE EARLY	0	0	0	0	0	0	0	0	0	0	0	0	0	0	0	0	0	0	0	0
FLCN	201163	symbol	H. sapiens	201163	H. sapiens	FLCN	folliculin	GO:2001170 negative regulation of ATP biosynthetic process;GO:2001169 regulation of ATP biosynthetic process;GO:2000973 regulation of pro-B cell differentiation			Cytoplasm				0	0	0	0	0	1	0	0	0	0	0	0	0	0	0	0	0	0	1	1
FMC1	154791	symbol	H. sapiens	154791	H. sapiens	FMC1	formation of mitochondrial complex V assembly factor 1 homolog	GO:0061469 regulation of type B pancreatic cell proliferation;GO:0050995 negative regulation of lipid catabolic process;GO:0044342 type B pancreatic cell proliferation							1	0	0	0	0	0	0	0	0	0	0	0	0	0	0	0	0	0	0	0
FMOD	2331	symbol	H. sapiens	2331	H. sapiens	FMOD	fibromodulin	GO:0042340 keratan sulfate catabolic process;GO:0007181 transforming growth factor beta receptor complex assembly;GO:0018146 keratan sulfate biosynthetic process					(M5882)NABA PROTEOGLYCANS; (M5884)NABA CORE MATRISOME; (M5889)NABA MATRISOME	(M5930)HALLMARK EPITHELIAL MESENCHYMAL TRANSITION	1	0	0	0	0	0	0	1	0	0	0	0	0	0	0	0	0	0	0	1
FN3KRP	79672	symbol	H. sapiens	79672	H. sapiens	FN3KRP	fructosamine 3 kinase related protein	GO:0043687 post-translational protein modification;GO:0016310 phosphorylation;GO:0006796 phosphate-containing compound metabolic process			Nucleus but not nucleoli				0	0	0	0	0	0	0	0	0	0	0	0	0	0	0	0	0	0	0	0
FNDC8	54752	symbol	H. sapiens	54752	H. sapiens	FNDC8	fibronectin type III domain containing 8						(M3008)NABA ECM GLYCOPROTEINS; (M5884)NABA CORE MATRISOME; (M5889)NABA MATRISOME		0	0	0	0	0	0	0	0	0	0	0	0	0	0	0	0	0	0	0	0
FOSL2	2355	symbol	H. sapiens	2355	H. sapiens	FOSL2	FOS like 2, AP-1 transcription factor subunit	GO:0003334 keratinocyte development;GO:0048146 positive regulation of fibroblast proliferation;GO:0030216 keratinocyte differentiation		Transcription factors/Basic domains	Nucleus		(M65)PID FRA PATHWAY; (M236)PID DELTA NP63 PATHWAY; (M167)PID AP1 PATHWAY	(M5891)HALLMARK HYPOXIA; (M5890)HALLMARK TNFA SIGNALING VIA NFKB	0	0	0	0	0	0	0	0	0	0	0	0	0	0	0	0	0	0	0	0
FOXI2	399823	symbol	H. sapiens	399823	H. sapiens	FOXI2	forkhead box I2	GO:0006357 regulation of transcription from RNA polymerase II promoter;GO:0006366 transcription from RNA polymerase II promoter;GO:0006355 regulation of transcription, DNA-templated		Transcription factors/Helix-turn-helix domains					0	0	0	0	0	0	0	0	0	0	0	0	0	0	0	0	0	0	0	0
FOXP4	116113	symbol	H. sapiens	116113	H. sapiens	FOXP4	forkhead box P4	GO:0006357 regulation of transcription from RNA polymerase II promoter;GO:0006366 transcription from RNA polymerase II promoter;GO:0006355 regulation of transcription, DNA-templated		Transcription factors/Helix-turn-helix domains	Nucleus but not nucleoli;Cytoplasm				0	0	0	0	0	0	0	0	0	0	0	0	0	0	0	0	0	0	0	0
FPGT	8790	symbol	H. sapiens	8790	H. sapiens	FPGT	fucose-1-phosphate guanylyltransferase	GO:0006004 fucose metabolic process;GO:0019318 hexose metabolic process;GO:0005996 monosaccharide metabolic process		Enzymes/ENZYME proteins/Transferases					0	0	0	0	0	0	1	0	0	0	0	0	0	0	0	0	0	0	0	0
FSCN1	6624	symbol	H. sapiens	6624	H. sapiens	FSCN1	fascin actin-bundling protein 1	GO:0090091 positive regulation of extracellular matrix disassembly;GO:0071803 positive regulation of podosome assembly;GO:0032534 regulation of microvillus assembly			Cytoplasm		(M16801)SIG REGULATION OF THE ACTIN CYTOSKELETON BY RHO GTPASES	(M5915)HALLMARK APICAL JUNCTION; (M5893)HALLMARK MITOTIC SPINDLE	0	0	0	0	0	0	0	0	0	0	0	0	0	0	0	0	0	0	0	0
FSTL3	10272	symbol	H. sapiens	10272	H. sapiens	FSTL3	follistatin like 3	GO:0045671 negative regulation of osteoclast differentiation;GO:0032926 negative regulation of activin receptor signaling pathway;GO:0002762 negative regulation of myeloid leukocyte differentiation			Nucleus but not nucleoli		(M5883)NABA SECRETED FACTORS; (M5885)NABA MATRISOME ASSOCIATED; (M5889)NABA MATRISOME	(M5930)HALLMARK EPITHELIAL MESENCHYMAL TRANSITION	0	0	0	0	0	1	0	0	0	0	0	0	0	0	0	0	0	0	0	0
FTO	79068	symbol	H. sapiens	79068	H. sapiens	FTO	FTO, alpha-ketoglutarate dependent dioxygenase	GO:0035552 oxidative single-stranded DNA demethylation;GO:0035553 oxidative single-stranded RNA demethylation;GO:0035511 oxidative DNA demethylation			Cytoplasm;Vesicles				0	0	0	0	0	0	0	0	0	0	0	1	0	0	0	0	0	0	0	0
FTSJ3	117246	symbol	H. sapiens	117246	H. sapiens	FTSJ3	FtsJ homolog 3	GO:0000463 maturation of LSU-rRNA from tricistronic rRNA transcript (SSU-rRNA, 5.8S rRNA, LSU-rRNA);GO:0031167 rRNA methylation;GO:0000466 maturation of 5.8S rRNA from tricistronic rRNA transcript (SSU-rRNA, 5.8S rRNA, LSU-rRNA)			Nucleoli				0	0	0	1	0	0	0	0	0	0	0	0	0	0	0	0	0	0	0	0
FUCA1	2517	symbol	H. sapiens	2517	H. sapiens	FUCA1	fucosidase, alpha-L- 1, tissue	GO:0016139 glycoside catabolic process;GO:0006004 fucose metabolic process;GO:0006027 glycosaminoglycan catabolic process		Enzymes/ENZYME proteins/Hydrolases				(M5930)HALLMARK EPITHELIAL MESENCHYMAL TRANSITION; (M5939)HALLMARK P53 PATHWAY; (M5953)HALLMARK KRAS SIGNALING UP	1	0	1	0	0	0	1	1	1	0	0	0	0	0	0	0	0	0	1	0
FUT4	2526	symbol	H. sapiens	2526	H. sapiens	FUT4	fucosyltransferase 4	GO:0042355 L-fucose catabolic process;GO:0019317 fucose catabolic process;GO:0042354 L-fucose metabolic process			Vesicles			(M5890)HALLMARK TNFA SIGNALING VIA NFKB	1	0	0	0	0	0	1	0	0	0	0	0	0	0	0	0	0	0	0	1
FZR1	51343	symbol	H. sapiens	51343	H. sapiens	FZR1	fizzy/cell division cycle 20 related 1	GO:0051437 positive regulation of ubiquitin-protein ligase activity involved in regulation of mitotic cell cycle transition;GO:0051436 negative regulation of ubiquitin-protein ligase activity involved in mitotic cell cycle;GO:1904667 negative regulation of ubiquitin protein ligase activity			Nucleus but not nucleoli;Nuclear membrane		(M242)PID AURORA A PATHWAY; (M129)PID PLK1 PATHWAY		0	0	0	0	0	0	0	0	0	0	0	0	0	0	0	0	0	0	0	0
G6PC3	92579	symbol	H. sapiens	92579	H. sapiens	G6PC3	glucose-6-phosphatase catalytic subunit 3	GO:0015760 glucose-6-phosphate transport;GO:0015712 hexose phosphate transport;GO:0006094 gluconeogenesis		Enzymes/ENZYME proteins/Hydrolases					0	1	0	0	0	0	1	0	0	0	0	0	0	0	1	0	0	0	0	0
GABBR1	2550	symbol	H. sapiens	2550	H. sapiens	GABBR1	gamma-aminobutyric acid type B receptor subunit 1	GO:0007194 negative regulation of adenylate cyclase activity;GO:0030818 negative regulation of cAMP biosynthetic process;GO:0045761 regulation of adenylate cyclase activity		G-protein coupled receptors/GPCRs excl olfactory receptors		Baclofen (G-protein coupled gaba receptor activity);Progabide (G-protein coupled gaba receptor activity);Vigabatrin (G-protein coupled gaba receptor activity);SGS742 (G-protein coupled gaba receptor activity);Arbaclofen (G-protein coupled gaba receptor activity);Arbaclofen Placarbil (G-protein coupled gaba receptor activity)		(M5932)HALLMARK INFLAMMATORY RESPONSE	0	0	0	0	0	0	0	0	0	0	0	0	0	0	0	0	0	0	1	1
GABRD	2563	symbol	H. sapiens	2563	H. sapiens	GABRD	gamma-aminobutyric acid type A receptor delta subunit	GO:1902476 chloride transmembrane transport;GO:0098661 inorganic anion transmembrane transport;GO:0006821 chloride transport				Temazepam (Gaba-a receptor activity);Adinazolam (Gaba-a receptor activity);Midazolam (Gaba-a receptor activity);Flurazepam (Gaba-a receptor activity);Halazepam (Gaba-a receptor activity);Diazepam (Gaba-a receptor activity);Oxazepam (Gaba-a receptor activity);Triazolam (Gaba-a receptor activity);Ethanol (Gaba-a receptor activity);Estazolam (Gaba-a receptor activity);Bromazepam (Gaba-a receptor act…			0	0	0	0	0	0	0	0	0	0	0	0	0	0	0	0	0	0	0	0
GABRG1	2565	symbol	H. sapiens	2565	H. sapiens	GABRG1	gamma-aminobutyric acid type A receptor gamma1 subunit	GO:1902476 chloride transmembrane transport;GO:0007214 gamma-aminobutyric acid signaling pathway;GO:0098661 inorganic anion transmembrane transport				Temazepam (Inhibitory extracellular ligand-gated ion channel activity);Adinazolam (Inhibitory extracellular ligand-gated ion channel activity);Midazolam (Inhibitory extracellular ligand-gated ion channel activity);Flurazepam (Inhibitory extracellular ligand-gated ion channel activity);Halazepam (Inhibitory extracellular ligand-gated ion channel activity);Diazepam (Inhibitory extracellular ligand-…			0	0	0	0	0	0	0	0	0	0	0	0	0	0	0	0	0	0	0	0
GAL	51083	symbol	H. sapiens	51083	H. sapiens	GAL	galanin and GMAP prepropeptide	GO:1902891 negative regulation of root hair elongation;GO:1902890 regulation of root hair elongation;GO:0051464 positive regulation of cortisol secretion						(M5941)HALLMARK UV RESPONSE UP; (M5907)HALLMARK ESTROGEN RESPONSE LATE	0	0	0	0	0	1	0	0	0	1	0	0	0	0	0	0	0	0	0	0
GAL3ST3	89792	symbol	H. sapiens	89792	H. sapiens	GAL3ST3	galactose-3-O-sulfotransferase 3	GO:0030309 poly-N-acetyllactosamine metabolic process;GO:0030166 proteoglycan biosynthetic process;GO:0009247 glycolipid biosynthetic process							0	1	0	0	0	0	1	1	0	0	0	0	0	0	0	0	0	0	0	1
GALC	2581	symbol	H. sapiens	2581	H. sapiens	GALC	galactosylceramidase	GO:0006683 galactosylceramide catabolic process;GO:0019376 galactolipid catabolic process;GO:0046477 glycosylceramide catabolic process		Enzymes/ENZYME proteins/Hydrolases				(M5910)HALLMARK PROTEIN SECRETION	1	1	1	0	0	0	1	1	0	0	0	0	0	0	0	0	0	0	0	0
GALM	130589	symbol	H. sapiens	130589	H. sapiens	GALM	galactose mutarotase	GO:0033499 galactose catabolic process via UDP-galactose;GO:0019388 galactose catabolic process;GO:0019320 hexose catabolic process		Enzymes/ENZYME proteins/Isomerase	Nucleus but not nucleoli			(M5947)HALLMARK IL2 STAT5 SIGNALING	1	0	0	0	0	0	1	0	0	0	0	0	0	0	0	0	0	0	0	0
GALNT4	8693	symbol	H. sapiens	8693	H. sapiens	GALNT4	polypeptide N-acetylgalactosaminyltransferase 4	GO:0016266 O-glycan processing;GO:0006493 protein O-linked glycosylation;GO:0006486 protein glycosylation		Enzymes/ENZYME proteins/Transferases					0	0	0	0	0	0	1	0	0	0	0	0	0	0	0	0	0	0	0	1
GALNT6	11226	symbol	H. sapiens	11226	H. sapiens	GALNT6	polypeptide N-acetylgalactosaminyltransferase 6	GO:0016266 O-glycan processing;GO:0006493 protein O-linked glycosylation;GO:0006486 protein glycosylation		Enzymes/ENZYME proteins/Transferases	Nucleus but not nucleoli;Golgi apparatus				0	0	0	0	0	0	0	0	0	0	0	0	0	0	0	0	0	0	0	1
GALR1	2587	symbol	H. sapiens	2587	H. sapiens	GALR1	galanin receptor 1	GO:0051464 positive regulation of cortisol secretion;GO:0051462 regulation of cortisol secretion;GO:2000851 positive regulation of glucocorticoid secretion		G-protein coupled receptors/GPCRs excl olfactory receptors					0	0	0	0	0	0	0	0	0	0	0	0	0	0	0	0	0	1	1	1
GAPT	202309	symbol	H. sapiens	202309	H. sapiens	GAPT	GRB2 binding adaptor protein, transmembrane	GO:0002322 B cell proliferation involved in immune response;GO:0002381 immunoglobulin production involved in immunoglobulin mediated immune response;GO:0001782 B cell homeostasis							0	0	0	0	0	1	0	0	0	0	0	0	0	0	0	0	1	0	0	0
GATSL2	729438	symbol	H. sapiens	729438	H. sapiens	GATSL2	GATS protein like 2	GO:1904262 negative regulation of TORC1 signaling;GO:1903432 regulation of TORC1 signaling;GO:0032007 negative regulation of TOR signaling			Centrosome				0	0	0	0	0	0	0	0	0	0	0	0	0	0	0	0	0	0	0	0
GCA	25801	symbol	H. sapiens	25801	H. sapiens	GCA	grancalcin	GO:0061025 membrane fusion;GO:0061024 membrane organization;GO:0006508 proteolysis			Cytoplasm			(M5921)HALLMARK COMPLEMENT	0	0	0	0	0	0	0	0	1	0	0	0	0	0	0	0	0	0	0	0
GCKR	2646	symbol	H. sapiens	2646	H. sapiens	GCKR	glucokinase regulator	GO:0033132 negative regulation of glucokinase activity;GO:1903300 negative regulation of hexokinase activity;GO:0033131 regulation of glucokinase activity						(M5934)HALLMARK XENOBIOTIC METABOLISM	0	0	0	0	0	0	1	0	0	0	0	0	0	0	1	0	0	0	1	0
GCM2	9247	symbol	H. sapiens	9247	H. sapiens	GCM2	glial cells missing homolog 2	GO:0030643 cellular phosphate ion homeostasis;GO:0072502 cellular trivalent inorganic anion homeostasis;GO:0072501 cellular divalent inorganic anion homeostasis		Transcription factors					0	0	0	0	0	0	0	0	0	0	0	0	0	0	0	0	0	1	0	0
GDF2	2658	symbol	H. sapiens	2658	H. sapiens	GDF2	growth differentiation factor 2	GO:0043537 negative regulation of blood vessel endothelial cell migration;GO:0045603 positive regulation of endothelial cell differentiation;GO:0010596 negative regulation of endothelial cell migration					(M185)PID ALK1 PATHWAY; (M5883)NABA SECRETED FACTORS; (M5885)NABA MATRISOME ASSOCIATED		0	0	0	0	0	0	0	0	0	0	0	0	0	0	0	1	0	1	0	0
GDPGP1	390637	symbol	H. sapiens	390637	H. sapiens	GDPGP1	GDP-D-glucose phosphorylase 1	GO:0006006 glucose metabolic process;GO:0019318 hexose metabolic process;GO:0043547 positive regulation of GTPase activity		Enzymes/ENZYME proteins/Transferases	Cytoplasm				0	0	0	0	0	0	1	0	0	0	0	0	0	0	0	0	0	0	0	0
GEMIN7	79760	symbol	H. sapiens	79760	H. sapiens	GEMIN7	gem nuclear organelle associated protein 7	GO:0000387 spliceosomal snRNP assembly;GO:0051170 nuclear import;GO:0000398 mRNA splicing, via spliceosome			Nucleus;Cytoplasm				0	0	0	1	0	0	0	0	0	0	0	0	0	0	0	0	0	0	0	0
GFER	2671	symbol	H. sapiens	2671	H. sapiens	GFER	growth factor, augmenter of liver regeneration	GO:0001889 liver development;GO:0061008 hepaticobiliary system development;GO:0048732 gland development		Enzymes/ENZYME proteins/Oxidoreductases	Cytoplasm;Mitochondria	Flavin adenine dinucleotide (Thiol oxidase activity)			0	0	0	0	0	0	0	0	0	0	0	1	0	0	0	0	0	0	0	0
GFI1	2672	symbol	H. sapiens	2672	H. sapiens	GFI1	growth factor independent 1 transcriptional repressor	GO:0010956 negative regulation of calcidiol 1-monooxygenase activity;GO:0070105 positive regulation of interleukin-6-mediated signaling pathway;GO:0010957 negative regulation of vitamin D biosynthetic process		Transcription factors/Zinc-coordinating DNA-binding domains			(M254)PID MYC REPRESS PATHWAY	(M5951)HALLMARK SPERMATOGENESIS	0	1	0	0	1	0	0	0	0	0	0	0	0	0	0	0	1	0	0	0
GGPS1	9453	symbol	H. sapiens	9453	H. sapiens	GGPS1	geranylgeranyl diphosphate synthase 1	GO:0033386 geranylgeranyl diphosphate biosynthetic process;GO:0033384 geranyl diphosphate biosynthetic process;GO:0045337 farnesyl diphosphate biosynthetic process		Enzymes/ENZYME proteins/Transferases		Zoledronic acid (Metal ion binding);Geranyl Diphosphate (Metal ion binding);FARNESYL THIOPYROPHOSPHATE (Metal ion binding);ISOPENTENYL PYROPHOSPHATE (Metal ion binding);(1-HYDROXYHEPTANE-1,1-DIYL)BIS(PHOSPHONIC ACID) (Metal ion binding);(1-HYDROXYNONANE-1,1-DIYL)BIS(PHOSPHONIC ACID) (Metal ion binding);(2,2-DIPHOSPHONOETHYL)(DODECYL)DIMETHYLPHOSPHONIUM (Metal ion binding);[2-(3-DIBENZOFURAN-4-YL-…			0	1	0	0	0	0	0	0	0	0	0	0	0	0	0	0	0	0	1	0
GHDC	84514	symbol	H. sapiens	84514	H. sapiens	GHDC	GH3 domain containing	GO:0008150 biological_process							0	0	0	0	0	0	0	0	1	0	0	0	0	0	0	0	0	0	0	0
GHRHR	2692	symbol	H. sapiens	2692	H. sapiens	GHRHR	growth hormone releasing hormone receptor	GO:0060133 somatotropin secreting cell development;GO:0046010 positive regulation of circadian sleep/wake cycle, non-REM sleep;GO:0007190 activation of adenylate cyclase activity		G-protein coupled receptors/{Family 2 (B) receptors,GPCRs excl olfactory receptors};Transporters		Sermorelin (Peptide hormone binding);Tesamorelin (Peptide hormone binding)			0	0	0	0	0	0	0	0	0	0	0	0	1	0	0	0	0	1	1	1
GIMAP4	55303	symbol	H. sapiens	55303	H. sapiens	GIMAP4	GTPase, IMAP family member 4								0	0	0	0	0	0	0	0	0	0	0	0	0	0	0	0	0	0	0	0
GINM1	116254	symbol	H. sapiens	116254	H. sapiens	GINM1	glycoprotein integral membrane 1				Nucleoli				0	0	0	0	0	0	0	0	0	0	0	0	0	0	0	0	0	0	0	0
GINS1	9837	symbol	H. sapiens	9837	H. sapiens	GINS1	GINS complex subunit 1	GO:1902983 DNA strand elongation involved in mitotic DNA replication;GO:1902319 DNA strand elongation involved in nuclear cell cycle DNA replication;GO:0001833 inner cell mass cell proliferation						(M5925)HALLMARK E2F TARGETS	0	0	0	0	0	0	0	0	0	0	0	0	0	0	0	0	0	0	0	0
GINS4	84296	symbol	H. sapiens	84296	H. sapiens	GINS4	GINS complex subunit 4	GO:0001833 inner cell mass cell proliferation;GO:0000727 double-strand break repair via break-induced replication;GO:0001832 blastocyst growth			Nucleus			(M5925)HALLMARK E2F TARGETS	0	0	0	0	0	0	0	0	0	0	0	0	0	0	0	0	0	0	0	0
GJB4	127534	symbol	H. sapiens	127534	H. sapiens	GJB4	gap junction protein beta 4	GO:0042048 olfactory behavior;GO:0007635 chemosensory behavior;GO:0007608 sensory perception of smell							0	0	0	0	0	0	0	0	0	0	0	0	0	0	0	0	0	0	0	0
GJC2	57165	symbol	H. sapiens	57165	H. sapiens	GJC2	gap junction protein gamma 2	GO:0009636 response to toxic substance;GO:0007267 cell-cell signaling;GO:0055085 transmembrane transport							0	0	0	0	0	0	0	0	0	0	0	0	0	0	0	0	0	0	0	0
GLA	2717	symbol	H. sapiens	2717	H. sapiens	GLA	galactosidase alpha	GO:0046477 glycosylceramide catabolic process;GO:0051001 negative regulation of nitric-oxide synthase activity;GO:0046479 glycosphingolipid catabolic process		Enzymes/ENZYME proteins/Hydrolases		Migalastat (Receptor binding)		(M5910)HALLMARK PROTEIN SECRETION; (M5906)HALLMARK ESTROGEN RESPONSE EARLY; (M5924)HALLMARK MTORC1 SIGNALING	1	1	1	0	0	0	1	1	1	0	0	0	0	0	0	0	0	0	0	0
GLDN	342035	symbol	H. sapiens	342035	H. sapiens	GLDN	gliomedin	GO:0045162 clustering of voltage-gated sodium channels;GO:0045161 neuronal ion channel clustering;GO:0034113 heterotypic cell-cell adhesion					(M3008)NABA ECM GLYCOPROTEINS; (M5884)NABA CORE MATRISOME; (M5889)NABA MATRISOME		0	0	0	0	0	1	0	0	0	0	0	0	0	0	0	0	0	0	0	0
GLE1	2733	symbol	H. sapiens	2733	H. sapiens	GLE1	GLE1, RNA export mediator	GO:0016973 poly(A)+ mRNA export from nucleus;GO:0006449 regulation of translational termination;GO:0006406 mRNA export from nucleus		Transporters/{Primary Active Transporters,Transporter channels and pores}	Plasma membrane;Cytoplasm				0	0	0	0	0	0	0	0	0	0	0	0	0	0	0	0	0	0	0	0
GLT6D1	360203	symbol	H. sapiens	360203	H. sapiens	GLT6D1	glycosyltransferase 6 domain containing 1	GO:0030259 lipid glycosylation;GO:0009247 glycolipid biosynthetic process;GO:0006664 glycolipid metabolic process				Uridine diphosphate glucose (Transferase activity, transferring hexosyl groups);Beta-D-Glucose (Transferase activity, transferring hexosyl groups);Uridine-5'-Diphosphate (Transferase activity, transferring hexosyl groups);Uridine-5'-Monophosphate (Transferase activity, transferring hexosyl groups);Lactose (Transferase activity, transferring hexosyl groups)			0	1	0	0	0	0	1	0	0	0	0	0	0	0	0	0	0	0	0	1
GLTPD2	388323	symbol	H. sapiens	388323	H. sapiens	GLTPD2	glycolipid transfer protein domain containing 2	GO:0046836 glycolipid transport;GO:1901264 carbohydrate derivative transport;GO:0006869 lipid transport							0	0	0	0	0	0	0	0	0	0	0	0	0	0	0	0	0	0	0	0
GMEB2	26205	symbol	H. sapiens	26205	H. sapiens	GMEB2	glucocorticoid modulatory element binding protein 2	GO:0006357 regulation of transcription from RNA polymerase II promoter;GO:0006366 transcription from RNA polymerase II promoter;GO:0006355 regulation of transcription, DNA-templated		Transcription factors	Nucleus but not nucleoli;Cytoplasm				0	0	0	0	0	0	0	0	0	0	0	0	0	0	0	0	0	0	0	0
GNA11	2767	symbol	H. sapiens	2767	H. sapiens	GNA11	G protein subunit alpha 11	GO:0045634 regulation of melanocyte differentiation;GO:0007213 G-protein coupled acetylcholine receptor signaling pathway;GO:0050932 regulation of pigment cell differentiation					(M138)PID THROMBIN PAR4 PATHWAY; (M155)PID S1P META PATHWAY; (M268)PID S1P S1P2 PATHWAY		0	0	0	0	0	1	0	0	0	0	0	0	1	0	0	0	0	0	0	0
GNB4	59345	symbol	H. sapiens	59345	H. sapiens	GNB4	G protein subunit beta 4	GO:0071377 cellular response to glucagon stimulus;GO:0033762 response to glucagon;GO:0021762 substantia nigra development		RAS pathway related proteins	Plasma membrane			(M5921)HALLMARK COMPLEMENT	0	0	0	0	0	0	0	0	0	0	0	0	0	0	1	0	0	0	0	0
GNPDA1	10007	symbol	H. sapiens	10007	H. sapiens	GNPDA1	glucosamine-6-phosphate deaminase 1	GO:0006043 glucosamine catabolic process;GO:0006046 N-acetylglucosamine catabolic process;GO:0019262 N-acetylneuraminate catabolic process		Enzymes/ENZYME proteins/Hydrolases		Beta-D-Glucose (Hydrolase activity);2-Deoxy-2-Amino Glucitol-6-Phosphate (Hydrolase activity);16g (Hydrolase activity)		(M5937)HALLMARK GLYCOLYSIS	1	1	0	0	0	0	1	1	0	0	0	0	0	0	0	0	0	0	0	1
GOSR2	9570	symbol	H. sapiens	9570	H. sapiens	GOSR2	golgi SNAP receptor complex member 2	GO:0048208 COPII vesicle coating;GO:0048207 vesicle targeting, rough ER to cis-Golgi;GO:0048280 vesicle fusion with Golgi apparatus			Nucleus but not nucleoli;Golgi apparatus		(M243)PID ARF 3PATHWAY	(M5910)HALLMARK PROTEIN SECRETION; (M5922)HALLMARK UNFOLDED PROTEIN RESPONSE	0	0	0	0	0	0	0	0	0	0	0	0	0	0	0	0	0	0	0	0
GP1BA	2811	symbol	H. sapiens	2811	H. sapiens	GP1BA	glycoprotein Ib platelet alpha subunit	GO:0007597 blood coagulation, intrinsic pathway;GO:0042730 fibrinolysis;GO:0072378 blood coagulation, fibrin clot formation		CD markers	Cytoplasm	ARC1779 (Thrombin receptor activity);liposomal prostaglandin E1 (Thrombin receptor activity)	(M169)PID INTEGRIN2 PATHWAY	(M5946)HALLMARK COAGULATION; (M5956)HALLMARK KRAS SIGNALING DN; (M5932)HALLMARK INFLAMMATORY RESPONSE	0	0	0	0	1	1	0	0	0	1	0	0	1	0	0	0	0	0	0	0
GPA33	10223	symbol	H. sapiens	10223	H. sapiens	GPA33	glycoprotein A33	GO:0016337 single organismal cell-cell adhesion;GO:0098602 single organism cell adhesion;GO:0098609 cell-cell adhesion							0	0	0	0	0	1	0	0	0	0	0	0	0	0	0	0	0	0	0	0
GPAT4	137964	symbol	H. sapiens	137964	H. sapiens	GPAT4	glycerol-3-phosphate acyltransferase 4	GO:0002071 glandular epithelial cell maturation;GO:0002069 columnar/cuboidal epithelial cell maturation;GO:0016024 CDP-diacylglycerol biosynthetic process		Enzymes/ENZYME proteins/Transferases				(M5905)HALLMARK ADIPOGENESIS	0	1	0	0	0	0	0	0	0	0	0	0	1	0	0	0	0	0	1	0
GPHA2	170589	symbol	H. sapiens	170589	H. sapiens	GPHA2	glycoprotein hormone alpha 2	GO:1903955 positive regulation of protein targeting to mitochondrion;GO:1903214 regulation of protein targeting to mitochondrion;GO:1903749 positive regulation of establishment of protein localization to mitochondrion							0	0	0	0	0	0	0	0	0	0	0	0	0	0	0	0	0	0	0	0
GPLD1	2822	symbol	H. sapiens	2822	H. sapiens	GPLD1	glycosylphosphatidylinositol specific phospholipase D1	GO:0010897 negative regulation of triglyceride catabolic process;GO:0010983 positive regulation of high-density lipoprotein particle clearance;GO:0006507 GPI anchor release		Enzymes/ENZYME proteins/Hydrolases	Cytoplasm		(M174)PID UPA UPAR PATHWAY		1	1	0	0	0	0	1	0	0	0	0	0	0	0	0	0	0	1	0	0
GPNMB	10457	symbol	H. sapiens	10457	H. sapiens	GPNMB	glycoprotein nmb	GO:0042130 negative regulation of T cell proliferation;GO:0050868 negative regulation of T cell activation;GO:0042129 regulation of T cell proliferation						(M5953)HALLMARK KRAS SIGNALING UP	0	0	0	0	0	1	0	0	0	0	0	0	0	0	0	1	0	0	0	0
GPR4	2828	symbol	H. sapiens	2828	H. sapiens	GPR4	G protein-coupled receptor 4	GO:0072144 glomerular mesangial cell development;GO:0072008 glomerular mesangial cell differentiation;GO:0072143 mesangial cell development		G-protein coupled receptors/GPCRs excl olfactory receptors					0	0	0	0	0	0	0	0	0	0	0	0	0	0	0	0	0	1	0	0
GPR65	8477	symbol	H. sapiens	8477	H. sapiens	GPR65	G protein-coupled receptor 65	GO:0051496 positive regulation of stress fiber assembly;GO:0051482 positive regulation of cytosolic calcium ion concentration involved in phospholipase C-activating G-protein coupled signaling pathway;GO:0030819 positive regulation of cAMP biosynthetic process		G-protein coupled receptors/{GPCRs excl olfactory receptors,Lysolipids receptors}				(M5950)HALLMARK ALLOGRAFT REJECTION; (M5947)HALLMARK IL2 STAT5 SIGNALING	0	0	0	0	0	0	0	0	0	0	0	0	0	0	0	0	0	1	1	1
GPR83	10888	symbol	H. sapiens	10888	H. sapiens	GPR83	G protein-coupled receptor 83	GO:0051384 response to glucocorticoid;GO:0031960 response to corticosteroid;GO:0007218 neuropeptide signaling pathway		G-protein coupled receptors/GPCRs excl olfactory receptors				(M5947)HALLMARK IL2 STAT5 SIGNALING	0	0	0	0	0	0	0	0	0	0	0	0	0	0	0	0	0	0	0	0
GPRC5A	9052	symbol	H. sapiens	9052	H. sapiens	GPRC5A	G protein-coupled receptor class C group 5 member A	GO:0007175 negative regulation of epidermal growth factor-activated receptor activity;GO:0061099 negative regulation of protein tyrosine kinase activity;GO:0007176 regulation of epidermal growth factor-activated receptor activity		G-protein coupled receptors/GPCRs excl olfactory receptors	Vesicles	Tretinoin (G-protein coupled receptor activity)			0	0	0	0	0	0	0	0	0	0	0	0	0	0	0	0	0	0	0	0
GPT	2875	symbol	H. sapiens	2875	H. sapiens	GPT	glutamic--pyruvic transaminase	GO:0042853 L-alanine catabolic process;GO:0006524 alanine catabolic process;GO:0042851 L-alanine metabolic process		Enzymes/ENZYME proteins/Transferases		Pyridoxal Phosphate (Pyridoxal phosphate binding);L-Glutamic Acid (Pyridoxal phosphate binding);L-Alanine (Pyridoxal phosphate binding);Phenelzine (Pyridoxal phosphate binding)			1	1	0	0	0	0	0	1	0	0	0	0	0	0	0	0	0	0	0	0
GPX6	257202	symbol	H. sapiens	257202	H. sapiens	GPX6	glutathione peroxidase 6	GO:0098869 cellular oxidant detoxification;GO:1990748 cellular detoxification;GO:0098754 detoxification		Enzymes/ENZYME proteins/Oxidoreductases		Glutathione (Glutathione peroxidase activity)			0	0	0	0	0	0	0	0	0	0	0	1	0	0	0	0	0	0	0	0
GRAP	10750	symbol	H. sapiens	10750	H. sapiens	GRAP	GRB2-related adaptor protein	GO:0007265 Ras protein signal transduction;GO:0007264 small GTPase mediated signal transduction;GO:0009967 positive regulation of signal transduction							0	0	0	0	0	0	0	0	0	0	0	0	0	0	0	0	0	0	0	0
GRPEL1	80273	symbol	H. sapiens	80273	H. sapiens	GRPEL1	GrpE like 1, mitochondrial	GO:0030150 protein import into mitochondrial matrix;GO:0044743 intracellular protein transmembrane import;GO:0006626 protein targeting to mitochondrion			Mitochondria			(M5941)HALLMARK UV RESPONSE UP; (M5905)HALLMARK ADIPOGENESIS; (M5936)HALLMARK OXIDATIVE PHOSPHORYLATION	0	0	0	0	0	0	0	0	0	0	0	0	0	0	0	0	0	0	0	0
GSDMC	56169	symbol	H. sapiens	56169	H. sapiens	GSDMC	gasdermin C	GO:0012501 programmed cell death;GO:0008219 cell death;GO:0044763 single-organism cellular process			Mitochondria				0	0	0	0	0	0	0	0	0	0	0	0	0	0	0	0	0	0	0	0
GSTA4	2941	symbol	H. sapiens	2941	H. sapiens	GSTA4	glutathione S-transferase alpha 4	GO:1901687 glutathione derivative biosynthetic process;GO:1901685 glutathione derivative metabolic process;GO:0006805 xenobiotic metabolic process		Enzymes/ENZYME proteins/Transferases		Glutathione (Protein homodimerization activity)			0	0	0	0	0	0	0	0	0	0	0	0	0	0	0	0	0	0	0	0
GSTT2	2953	symbol	H. sapiens	2953	H. sapiens	GSTT2	glutathione S-transferase theta 2 (gene/pseudogene)	GO:0006749 glutathione metabolic process;GO:0006575 cellular modified amino acid metabolic process;GO:0006790 sulfur compound metabolic process				S-Hexylglutathione (Glutathione transferase activity)		(M5934)HALLMARK XENOBIOTIC METABOLISM	0	0	0	0	0	0	0	0	0	0	0	0	0	0	0	0	0	0	0	0
GTF2E1	2960	symbol	H. sapiens	2960	H. sapiens	GTF2E1	general transcription factor IIE subunit 1	GO:0042795 snRNA transcription from RNA polymerase II promoter;GO:0009301 snRNA transcription;GO:0006368 transcription elongation from RNA polymerase II promoter			Nucleus				0	0	0	1	0	0	0	0	0	0	1	0	0	0	0	0	0	0	0	0
GTF2F2	2963	symbol	H. sapiens	2963	H. sapiens	GTF2F2	general transcription factor IIF subunit 2	GO:0050434 positive regulation of viral transcription;GO:0046782 regulation of viral transcription;GO:0060261 positive regulation of transcription initiation from RNA polymerase II promoter		Enzymes/ENZYME proteins/Hydrolases	Nucleus				0	0	0	1	0	0	0	0	0	0	0	0	0	0	0	0	0	0	0	0
GTPBP3	84705	symbol	H. sapiens	84705	H. sapiens	GTPBP3	GTP binding protein 3 (mitochondrial)	GO:0002098 tRNA wobble uridine modification;GO:0002097 tRNA wobble base modification;GO:0030488 tRNA methylation			Mitochondria				0	0	0	1	0	0	0	0	0	0	0	0	0	0	0	0	0	0	0	0
GTPBP4	23560	symbol	H. sapiens	23560	H. sapiens	GTPBP4	GTP binding protein 4	GO:0033342 negative regulation of collagen binding;GO:0033341 regulation of collagen binding;GO:0000463 maturation of LSU-rRNA from tricistronic rRNA transcript (SSU-rRNA, 5.8S rRNA, LSU-rRNA)			Nucleoli				0	0	0	1	0	1	0	0	0	0	0	0	0	0	0	0	0	0	0	0
GUCD1	83606	symbol	H. sapiens	83606	H. sapiens	GUCD1	guanylyl cyclase domain containing 1				Nucleus but not nucleoli				0	0	0	0	0	0	0	0	0	0	0	0	0	0	0	0	0	0	0	0
GUSB	2990	symbol	H. sapiens	2990	H. sapiens	GUSB	glucuronidase beta	GO:0030214 hyaluronan catabolic process;GO:0030212 hyaluronan metabolic process;GO:0006027 glycosaminoglycan catabolic process		Enzymes/ENZYME proteins/Hydrolases	Vesicles			(M5892)HALLMARK CHOLESTEROL HOMEOSTASIS; (M5937)HALLMARK GLYCOLYSIS	0	0	1	0	0	0	1	1	1	0	0	0	0	0	0	0	0	0	0	0
GZMB	3002	symbol	H. sapiens	3002	H. sapiens	GZMB	granzyme B	GO:1900740 positive regulation of protein insertion into mitochondrial membrane involved in apoptotic signaling pathway;GO:1900739 regulation of protein insertion into mitochondrial membrane involved in apoptotic signaling pathway;GO:1901030 positive regulation of mitochondrial outer membrane permeabilization involved in apoptotic signaling pathway		Enzymes/{ENZYME proteins/Hydrolases,Peptidases/Serine-type peptidases}	Cytoplasm;Vesicles		(M7997)SA CASPASE CASCADE; (M220)PID CASPASE PATHWAY; (M54)PID IL12 2PATHWAY	(M5950)HALLMARK ALLOGRAFT REJECTION; (M5921)HALLMARK COMPLEMENT	0	0	0	0	0	0	0	0	0	0	0	0	0	0	0	0	1	0	0	0
H2AFJ	55766	symbol	H. sapiens	55766	H. sapiens	H2AFJ	H2A histone family member J	GO:0006342 chromatin silencing;GO:0045814 negative regulation of gene expression, epigenetic;GO:0045892 negative regulation of transcription, DNA-templated						(M5939)HALLMARK P53 PATHWAY	0	0	0	0	0	0	0	0	0	0	0	0	0	0	0	0	0	0	0	0
H2AFX	3014	symbol	H. sapiens	3014	H. sapiens	H2AFX	H2A histone family member X	GO:0071480 cellular response to gamma radiation;GO:0021987 cerebral cortex development;GO:0045739 positive regulation of DNA repair			Nucleus but not nucleoli		(M84)PID ATM PATHWAY; (M1)PID FANCONI PATHWAY	(M5922)HALLMARK UNFOLDED PROTEIN RESPONSE; (M5941)HALLMARK UV RESPONSE UP; (M5901)HALLMARK G2M CHECKPOINT	0	0	0	0	0	0	0	0	0	0	0	0	0	0	0	0	0	0	0	0
HAAO	23498	symbol	H. sapiens	23498	H. sapiens	HAAO	3-hydroxyanthranilate 3,4-dioxygenase	GO:0034354 'de novo' NAD biosynthetic process from tryptophan;GO:0034627 'de novo' NAD biosynthetic process;GO:0006569 tryptophan catabolic process		Enzymes/ENZYME proteins/Oxidoreductases					1	1	0	0	0	0	0	1	0	0	0	1	0	0	0	0	0	1	1	0
HABP4	22927	symbol	H. sapiens	22927	H. sapiens	HABP4	hyaluronan binding protein 4	GO:0002576 platelet degranulation;GO:0043392 negative regulation of DNA binding;GO:0071260 cellular response to mechanical stimulus			Cytoplasm	Hyaluronic acid			0	0	0	0	0	0	0	0	0	0	0	0	0	0	0	0	0	0	0	0
HAPLN4	404037	symbol	H. sapiens	404037	H. sapiens	HAPLN4	hyaluronan and proteoglycan link protein 4	GO:0001501 skeletal system development;GO:0007417 central nervous system development;GO:0007155 cell adhesion				Hyaluronic acid (Hyaluronic acid binding)	(M5882)NABA PROTEOGLYCANS; (M5884)NABA CORE MATRISOME; (M5889)NABA MATRISOME		0	0	0	0	0	0	0	0	0	0	0	0	0	0	0	0	0	0	0	0
HARS	3035	symbol	H. sapiens	3035	H. sapiens	HARS	histidyl-tRNA synthetase	GO:0006427 histidyl-tRNA aminoacylation;GO:0006418 tRNA aminoacylation for protein translation;GO:0043039 tRNA aminoacylation		Enzymes/ENZYME proteins/Ligase	Cytoplasm	L-Histidine (Histidine-trna ligase activity)			0	1	0	1	0	0	0	0	0	0	0	0	0	0	0	0	0	0	0	0
HAUS5	23354	symbol	H. sapiens	23354	H. sapiens	HAUS5	HAUS augmin like complex subunit 5	GO:0051225 spindle assembly;GO:0051297 centrosome organization;GO:0000086 G2/M transition of mitotic cell cycle							0	0	0	0	0	0	0	0	0	0	0	0	0	0	0	0	0	0	0	0
HAVCR2	84868	symbol	H. sapiens	84868	H. sapiens	HAVCR2	hepatitis A virus cellular receptor 2	GO:2001189 negative regulation of T cell activation via T cell receptor contact with antigen bound to MHC molecule on antigen presenting cell;GO:2001188 regulation of T cell activation via T cell receptor contact with antigen bound to MHC molecule on antigen presenting cell;GO:0002859 negative regulation of natural killer cell mediated cytotoxicity directed against tumor cell target			Nucleus but not nucleoli				0	0	0	0	0	1	0	0	0	1	0	0	0	0	0	1	1	0	0	0
HDGFL1	154150	symbol	H. sapiens	154150	H. sapiens	HDGFL1	hepatoma derived growth factor-like 1								0	0	0	0	0	0	0	0	0	0	0	0	0	0	0	0	0	0	0	0
HEYL	26508	symbol	H. sapiens	26508	H. sapiens	HEYL	hes related family bHLH transcription factor with YRPW motif-like	GO:2000824 negative regulation of androgen receptor activity;GO:2000823 regulation of androgen receptor activity;GO:0060766 negative regulation of androgen receptor signaling pathway		Transcription factors/Basic domains	Mitochondria			(M5903)HALLMARK NOTCH SIGNALING	0	0	0	0	0	0	0	0	0	0	0	0	0	0	0	0	0	0	0	0
HGFAC	3083	symbol	H. sapiens	3083	H. sapiens	HGFAC	HGF activator	GO:0006508 proteolysis;GO:0019538 protein metabolic process;GO:0043170 macromolecule metabolic process		Enzymes/Peptidases/Serine-type peptidases			(M5883)NABA SECRETED FACTORS; (M5885)NABA MATRISOME ASSOCIATED; (M5889)NABA MATRISOME	(M5934)HALLMARK XENOBIOTIC METABOLISM	0	0	0	0	0	0	0	0	0	0	0	0	0	0	0	0	0	0	0	0
HGH1	51236	symbol	H. sapiens	51236	H. sapiens	HGH1	HGH1 homolog	GO:0008150 biological_process			Nucleus but not nucleoli;Cytoplasm				0	0	0	0	0	0	0	0	0	0	0	0	0	0	0	0	0	0	0	0
HID1	283987	symbol	H. sapiens	283987	H. sapiens	HID1	HID1 domain containing	GO:0031001 response to brefeldin A;GO:0046677 response to antibiotic;GO:0006886 intracellular protein transport			Cytoplasm;Golgi apparatus				0	0	0	0	0	0	0	0	0	0	0	0	0	0	0	0	0	0	0	0
HIP1	3092	symbol	H. sapiens	3092	H. sapiens	HIP1	huntingtin interacting protein 1	GO:2000588 positive regulation of platelet-derived growth factor receptor-beta signaling pathway;GO:2000586 regulation of platelet-derived growth factor receptor-beta signaling pathway;GO:0010641 positive regulation of platelet-derived growth factor receptor signaling pathway			Vesicles		(M58)PID AR PATHWAY		0	0	0	0	0	0	0	0	0	0	0	0	0	0	0	0	0	0	0	0
HIST3H2A	92815	symbol	H. sapiens	92815	H. sapiens	HIST3H2A	histone cluster 3 H2A	GO:0070914 UV-damage excision repair;GO:0006337 nucleosome disassembly;GO:0032986 protein-DNA complex disassembly						(M5939)HALLMARK P53 PATHWAY	0	0	0	0	0	0	0	0	0	0	0	0	0	0	0	0	0	0	0	0
HLX	3142	symbol	H. sapiens	3142	H. sapiens	HLX	H2.0 like homeobox	GO:0045629 negative regulation of T-helper 2 cell differentiation;GO:0045627 positive regulation of T-helper 1 cell differentiation;GO:0045625 regulation of T-helper 1 cell differentiation		Transcription factors/Helix-turn-helix domains	Nucleus but not nucleoli;Cytoplasm		(M54)PID IL12 2PATHWAY		0	0	0	0	0	1	0	0	0	0	0	0	0	0	0	0	1	0	0	0
HMCES	56941	symbol	H. sapiens	56941	H. sapiens	HMCES	5-hydroxymethylcytosine (hmC) binding, ES cell-specific	GO:0006508 proteolysis;GO:0019538 protein metabolic process;GO:0043170 macromolecule metabolic process			Nucleus				0	0	0	0	0	0	0	0	0	0	0	0	0	0	0	0	0	0	0	0
HMMR	3161	symbol	H. sapiens	3161	H. sapiens	HMMR	hyaluronan mediated motility receptor	GO:0030214 hyaluronan catabolic process;GO:0030212 hyaluronan metabolic process;GO:0006027 glycosaminoglycan catabolic process		CD markers	Cytoskeleton (Microtubules)	Hyaluronic acid (Hyaluronic acid binding)		(M5901)HALLMARK G2M CHECKPOINT; (M5937)HALLMARK GLYCOLYSIS; (M5925)HALLMARK E2F TARGETS	0	0	0	0	0	0	0	1	0	0	0	0	0	0	0	0	0	0	0	0
HMX1	3166	symbol	H. sapiens	3166	H. sapiens	HMX1	H6 family homeobox 1	GO:0000122 negative regulation of transcription from RNA polymerase II promoter;GO:0045892 negative regulation of transcription, DNA-templated;GO:1903507 negative regulation of nucleic acid-templated transcription		Transcription factors/Helix-turn-helix domains					0	0	0	0	0	0	0	0	0	0	0	0	0	0	0	0	0	0	0	0
HN1L	90861	symbol	H. sapiens	90861	H. sapiens	HN1L	hematological and neurological expressed 1 like				Plasma membrane;Cytoplasm				0	0	0	0	0	0	0	0	0	0	0	0	0	0	0	0	0	0	0	0
HP	3240	symbol	H. sapiens	3240	H. sapiens	HP	haptoglobin	GO:2000296 negative regulation of hydrogen peroxide catabolic process;GO:2000295 regulation of hydrogen peroxide catabolic process;GO:0010727 negative regulation of hydrogen peroxide metabolic process		Enzymes/Peptidases/Serine-type peptidases					0	0	0	0	0	0	0	0	1	1	0	0	0	1	0	0	1	0	0	0
HPGDS	27306	symbol	H. sapiens	27306	H. sapiens	HPGDS	hematopoietic prostaglandin D synthase	GO:0019371 cyclooxygenase pathway;GO:2000255 negative regulation of male germ cell proliferation;GO:0001516 prostaglandin biosynthetic process		Enzymes/ENZYME proteins/{Isomerase,Transferases}		Glutathione (Protein homodimerization activity);2-(2f-Benzothiazolyl)-5-Styryl-3-(4f-Phthalhydrazidyl)Tetrazolium Chloride (Protein homodimerization activity);Glycerol (Protein homodimerization activity);3-phenyl-5-(1H-pyrazol-3-yl)isoxazole (Protein homodimerization activity);PHENYL-5-(1H-PYRAZOL-3-YL)-1,3-THIAZOLE (Protein homodimerization activity);Tranilast (Protein homodimerization activity)…			0	1	0	0	0	0	0	0	0	0	0	0	0	0	0	0	0	0	0	0
HPS6	79803	symbol	H. sapiens	79803	H. sapiens	HPS6	HPS6, biogenesis of lysosomal organelles complex 2 subunit 3	GO:0030318 melanocyte differentiation;GO:0050931 pigment cell differentiation;GO:0032418 lysosome localization							0	0	0	0	0	0	0	0	0	0	0	0	1	0	0	0	0	0	0	0
HS1BP3	64342	symbol	H. sapiens	64342	H. sapiens	HS1BP3	HCLS1 binding protein 3	GO:0042981 regulation of apoptotic process;GO:0043067 regulation of programmed cell death;GO:0006915 apoptotic process			Nucleoli				0	0	0	0	0	0	0	0	0	0	0	0	0	0	0	0	0	0	0	0
HS6ST1	9394	symbol	H. sapiens	9394	H. sapiens	HS6ST1	heparan sulfate 6-O-sulfotransferase 1	GO:0015015 heparan sulfate proteoglycan biosynthetic process, enzymatic modification;GO:0060716 labyrinthine layer blood vessel development;GO:0015012 heparan sulfate proteoglycan biosynthetic process			Nucleus but not nucleoli				0	0	0	0	0	0	0	1	0	0	0	0	0	0	0	0	0	0	0	1
HSD17B1	3292	symbol	H. sapiens	3292	H. sapiens	HSD17B1	hydroxysteroid 17-beta dehydrogenase 1	GO:0006703 estrogen biosynthetic process;GO:0061370 testosterone biosynthetic process;GO:0008210 estrogen metabolic process		Enzymes/ENZYME proteins/Oxidoreductases	Cytoplasm	NADH (Testosterone dehydrogenase (nad+) activity);4-Androstenedione (Testosterone dehydrogenase (nad+) activity);Androstanedione (Testosterone dehydrogenase (nad+) activity);Dehydroepiandrosterone (Testosterone dehydrogenase (nad+) activity);Equilin (Testosterone dehydrogenase (nad+) activity);EM-1745 (Testosterone dehydrogenase (nad+) activity);Dihydrotestosterone (Testosterone dehydrogenase (na…			0	1	0	0	0	0	0	0	0	0	0	1	0	0	0	0	0	0	0	0
HSDL1	83693	symbol	H. sapiens	83693	H. sapiens	HSDL1	hydroxysteroid dehydrogenase like 1								0	0	0	0	0	0	0	0	0	0	0	0	0	0	0	0	0	0	0	0
HSPB6	126393	symbol	H. sapiens	126393	H. sapiens	HSPB6	heat shock protein family B (small) member 6	GO:0006937 regulation of muscle contraction;GO:0090257 regulation of muscle system process;GO:0006936 muscle contraction							0	0	0	0	0	0	0	0	0	0	0	0	0	0	0	0	0	0	0	0
HTRA4	203100	symbol	H. sapiens	203100	H. sapiens	HTRA4	HtrA serine peptidase 4	GO:0030512 negative regulation of transforming growth factor beta receptor signaling pathway;GO:1903845 negative regulation of cellular response to transforming growth factor beta stimulus;GO:0017015 regulation of transforming growth factor beta receptor signaling pathway		Enzymes/Peptidases/Serine-type peptidases			(M3468)NABA ECM REGULATORS; (M5885)NABA MATRISOME ASSOCIATED; (M5889)NABA MATRISOME		0	0	0	0	0	0	0	0	0	0	0	0	0	0	0	0	0	0	0	0
IAH1	285148	symbol	H. sapiens	285148	H. sapiens	IAH1	isoamyl acetate-hydrolyzing esterase 1 homolog	GO:0016042 lipid catabolic process;GO:0044712 single-organism catabolic process;GO:0006629 lipid metabolic process			Nucleus but not nucleoli				1	0	0	0	0	0	0	0	0	0	0	0	0	0	0	0	0	0	0	0
ICMT	23463	symbol	H. sapiens	23463	H. sapiens	ICMT	isoprenylcysteine carboxyl methyltransferase	GO:0006481 C-terminal protein methylation;GO:0018410 C-terminal protein amino acid modification;GO:0043687 post-translational protein modification		Enzymes/ENZYME proteins/Transferases					0	0	0	0	0	0	0	0	0	0	0	0	0	0	0	0	0	0	0	0
IFI35	3430	symbol	H. sapiens	3430	H. sapiens	IFI35	interferon induced protein 35	GO:0060337 type I interferon signaling pathway;GO:0071357 cellular response to type I interferon;GO:0034340 response to type I interferon						(M5911)HALLMARK INTERFERON ALPHA RESPONSE; (M5913)HALLMARK INTERFERON GAMMA RESPONSE	0	0	0	0	1	0	0	0	0	0	0	0	0	0	0	0	1	0	0	0
IFITM2	10581	symbol	H. sapiens	10581	H. sapiens	IFITM2	interferon induced transmembrane protein 2	GO:0046597 negative regulation of viral entry into host cell;GO:0046596 regulation of viral entry into host cell;GO:0045071 negative regulation of viral genome replication		Transporters/Accessory Factors Involved in Transport	Nucleus;Cell Junctions			(M5911)HALLMARK INTERFERON ALPHA RESPONSE; (M5913)HALLMARK INTERFERON GAMMA RESPONSE	0	0	0	0	1	0	0	0	0	0	0	0	0	0	0	0	1	0	0	0
IFNGR1	3459	symbol	H. sapiens	3459	H. sapiens	IFNGR1	interferon gamma receptor 1	GO:0060334 regulation of interferon-gamma-mediated signaling pathway;GO:0060330 regulation of response to interferon-gamma;GO:0060333 interferon-gamma-mediated signaling pathway		CD markers	Vesicles	Interferon gamma-1b (Interferon-gamma receptor activity)	(M4170)ST INTERFERON GAMMA PATHWAY; (M161)PID IFNG PATHWAY; (M100)PID SHP2 PATHWAY	(M5897)HALLMARK IL6 JAK STAT3 SIGNALING; (M5902)HALLMARK APOPTOSIS; (M5950)HALLMARK ALLOGRAFT REJECTION	0	0	0	0	1	0	0	0	0	0	0	0	0	0	0	0	1	0	0	0
IFRD2	7866	symbol	H. sapiens	7866	H. sapiens	IFRD2	interferon related developmental regulator 2				Nucleus but not nucleoli				0	0	0	0	0	0	0	0	0	0	0	0	0	0	0	0	0	0	0	0
IKBKB	3551	symbol	H. sapiens	3551	H. sapiens	IKBKB	inhibitor of kappa light polypeptide gene enhancer in B-cells, kinase beta	GO:0035666 TRIF-dependent toll-like receptor signaling pathway;GO:1903347 negative regulation of bicellular tight junction assembly;GO:0002756 MyD88-independent toll-like receptor signaling pathway	Other	Enzymes/{ENZYME proteins/Transferases,Kinases};RAS pathway related proteins	Cytoplasm	Mesalazine (Scaffold protein binding);Sulfasalazine (Scaffold protein binding);Acetylsalicylic acid (Scaffold protein binding);Auranofin (Scaffold protein binding);Arsenic trioxide (Scaffold protein binding);MLN0415 (Scaffold protein binding);Acetylcysteine (Scaffold protein binding)	(M26)PID NFKAPPAB ATYPICAL PATHWAY; (M37)PID NFKAPPAB CANONICAL PATHWAY; (M264)PID TOLL ENDOGENOUS PATHWAY	(M5950)HALLMARK ALLOGRAFT REJECTION	0	0	0	0	1	0	0	0	0	1	1	0	0	0	0	0	1	0	0	0
IKBKE	9641	symbol	H. sapiens	9641	H. sapiens	IKBKE	inhibitor of kappa light polypeptide gene enhancer in B-cells, kinase epsilon	GO:0035666 TRIF-dependent toll-like receptor signaling pathway;GO:0002756 MyD88-independent toll-like receptor signaling pathway;GO:0002224 toll-like receptor signaling pathway	Other	Enzymes/{ENZYME proteins/Transferases,Kinases}	Cytoplasm				0	0	0	0	1	0	0	0	0	0	1	0	0	0	0	1	1	0	0	0
IL10RB	3588	symbol	H. sapiens	3588	H. sapiens	IL10RB	interleukin 10 receptor subunit beta	GO:0051607 defense response to virus;GO:0009615 response to virus;GO:0019221 cytokine-mediated signaling pathway		CD markers	Cytoplasm			(M5897)HALLMARK IL6 JAK STAT3 SIGNALING	0	0	0	0	1	0	0	0	0	1	1	0	0	0	0	0	1	0	0	0
IL12B	3593	symbol	H. sapiens	3593	H. sapiens	IL12B	interleukin 12B	GO:2000330 positive regulation of T-helper 17 cell lineage commitment;GO:2000328 regulation of T-helper 17 cell lineage commitment;GO:2000321 positive regulation of T-helper 17 cell differentiation				5-Mercapto-2-Nitro-Benzoic Acid (Protein heterodimerization activity);Briakinumab (Protein heterodimerization activity);Ustekinumab (Protein heterodimerization activity);Ustekinumab (Protein heterodimerization activity);humanized SMART Anti-IL-12 Antibody (Protein heterodimerization activity)	(M36)PID IL27 PATHWAY; (M196)PID IL23 PATHWAY; (M54)PID IL12 2PATHWAY	(M5956)HALLMARK KRAS SIGNALING DN; (M5950)HALLMARK ALLOGRAFT REJECTION; (M5932)HALLMARK INFLAMMATORY RESPONSE	0	0	0	0	1	1	0	0	0	1	0	0	0	0	0	1	1	0	0	0
IL17F	112744	symbol	H. sapiens	112744	H. sapiens	IL17F	interleukin 17F	GO:0042109 lymphotoxin A biosynthetic process;GO:0045423 regulation of granulocyte macrophage colony-stimulating factor biosynthetic process;GO:1900017 positive regulation of cytokine production involved in inflammatory response					(M196)PID IL23 PATHWAY; (M5883)NABA SECRETED FACTORS; (M5885)NABA MATRISOME ASSOCIATED		0	0	0	0	0	0	0	0	0	1	0	0	0	0	0	1	0	0	0	0
IL17RB	55540	symbol	H. sapiens	55540	H. sapiens	IL17RB	interleukin 17 receptor B	GO:2000664 positive regulation of interleukin-5 secretion;GO:2000667 positive regulation of interleukin-13 secretion;GO:2000662 regulation of interleukin-5 secretion						(M5897)HALLMARK IL6 JAK STAT3 SIGNALING; (M5907)HALLMARK ESTROGEN RESPONSE LATE; (M5906)HALLMARK ESTROGEN RESPONSE EARLY	0	0	0	0	1	0	0	0	0	1	0	0	0	0	0	1	0	0	0	0
IL1A	3552	symbol	H. sapiens	3552	H. sapiens	IL1A	interleukin 1 alpha	GO:2000391 positive regulation of neutrophil extravasation;GO:2000389 regulation of neutrophil extravasation;GO:0072672 neutrophil extravasation				Rilonacept (Cytokine activity)	(M110)PID IL1 PATHWAY; (M239)PID A6B1 A6B4 INTEGRIN PATHWAY; (M236)PID DELTA NP63 PATHWAY	(M5902)HALLMARK APOPTOSIS; (M5890)HALLMARK TNFA SIGNALING VIA NFKB; (M5932)HALLMARK INFLAMMATORY RESPONSE	0	0	0	0	1	0	0	0	0	1	0	0	0	1	0	1	0	0	0	0
IL20RB	53833	symbol	H. sapiens	53833	H. sapiens	IL20RB	interleukin 20 receptor subunit beta	GO:0001808 negative regulation of type IV hypersensitivity;GO:0002884 negative regulation of hypersensitivity;GO:0001807 regulation of type IV hypersensitivity			Nucleus but not nucleoli				0	0	0	0	1	1	0	0	0	1	0	0	0	1	0	1	1	0	0	0
IL21R	50615	symbol	H. sapiens	50615	H. sapiens	IL21R	interleukin 21 receptor	GO:0038114 interleukin-21-mediated signaling pathway;GO:0098757 cellular response to interleukin-21;GO:0098756 response to interleukin-21		CD markers	Plasma membrane;Cytoplasm				0	0	0	0	1	1	0	0	0	0	0	0	0	0	0	0	0	0	0	0
IL22RA1	58985	symbol	H. sapiens	58985	H. sapiens	IL22RA1	interleukin 22 receptor subunit alpha 1	GO:0050829 defense response to Gram-negative bacterium;GO:0042742 defense response to bacterium;GO:0019221 cytokine-mediated signaling pathway							0	0	0	0	1	0	0	0	0	0	0	0	0	0	0	0	1	0	0	0
IL2RB	3560	symbol	H. sapiens	3560	H. sapiens	IL2RB	interleukin 2 receptor subunit beta	GO:0038110 interleukin-2-mediated signaling pathway;GO:0071352 cellular response to interleukin-2;GO:0070669 response to interleukin-2		CD markers	Nucleus;Nucleoli	Denileukin diftitox (Interleukin-2 receptor activity);Aldesleukin (Interleukin-2 receptor activity);Basiliximab (Interleukin-2 receptor activity);Daclizumab (Interleukin-2 receptor activity)	(M234)PID IL2 STAT5 PATHWAY; (M143)PID IL2 PI3K PATHWAY; (M122)PID IL2 1PATHWAY	(M5916)HALLMARK APICAL SURFACE; (M5950)HALLMARK ALLOGRAFT REJECTION; (M5913)HALLMARK INTERFERON GAMMA RESPONSE	0	0	0	0	1	0	0	0	0	0	0	0	0	0	0	0	0	0	0	0
IL3	3562	symbol	H. sapiens	3562	H. sapiens	IL3	interleukin 3	GO:0042523 positive regulation of tyrosine phosphorylation of Stat5 protein;GO:0070668 positive regulation of mast cell proliferation;GO:0070666 regulation of mast cell proliferation				Amlexanox (Interleukin-3 receptor binding)	(M182)PID IL3 PATHWAY; (M235)PID TCR CALCIUM PATHWAY; (M60)PID NFAT TFPATHWAY		0	0	0	0	1	1	0	0	0	0	0	0	0	0	0	0	0	0	0	0
IL34	146433	symbol	H. sapiens	146433	H. sapiens	IL34	interleukin 34	GO:0045657 positive regulation of monocyte differentiation;GO:0045651 positive regulation of macrophage differentiation;GO:0045655 regulation of monocyte differentiation					(M5883)NABA SECRETED FACTORS; (M5885)NABA MATRISOME ASSOCIATED; (M5889)NABA MATRISOME		0	0	0	0	0	0	0	0	0	1	0	0	0	0	0	0	1	0	0	0
ILDR2	387597	symbol	H. sapiens	387597	H. sapiens	ILDR2	immunoglobulin like domain containing receptor 2	GO:0048873 homeostasis of number of cells within a tissue;GO:0030073 insulin secretion;GO:0009749 response to glucose							0	0	0	0	0	0	0	0	0	0	0	0	0	0	0	0	0	0	0	0
IMP4	92856	symbol	H. sapiens	92856	H. sapiens	IMP4	IMP4 homolog, U3 small nucleolar ribonucleoprotein	GO:0006364 rRNA processing;GO:0016072 rRNA metabolic process;GO:0034470 ncRNA processing						(M5928)HALLMARK MYC TARGETS V2	0	0	0	1	0	0	0	0	0	0	0	0	0	0	0	0	0	0	0	0
IMPA2	3613	symbol	H. sapiens	3613	H. sapiens	IMPA2	inositol monophosphatase 2	GO:0046855 inositol phosphate dephosphorylation;GO:0006021 inositol biosynthetic process;GO:0071545 inositol phosphate catabolic process		Enzymes/ENZYME proteins/Hydrolases	Nucleus but not nucleoli;Mitochondria	Lithium (Protein homodimerization activity)		(M5907)HALLMARK ESTROGEN RESPONSE LATE	1	1	0	0	0	0	1	0	0	0	0	0	0	0	0	0	0	0	0	0
IMPG2	50939	symbol	H. sapiens	50939	H. sapiens	IMPG2	interphotoreceptor matrix proteoglycan 2	GO:0007601 visual perception;GO:0050953 sensory perception of light stimulus;GO:0007600 sensory perception				Hyaluronic acid (Hyaluronic acid binding)	(M5882)NABA PROTEOGLYCANS; (M5884)NABA CORE MATRISOME; (M5889)NABA MATRISOME		0	0	0	0	0	0	0	0	0	0	0	0	0	0	0	0	0	0	0	0
ING5	84289	symbol	H. sapiens	84289	H. sapiens	ING5	inhibitor of growth family member 5	GO:0043966 histone H3 acetylation;GO:0016573 histone acetylation;GO:2001235 positive regulation of apoptotic signaling pathway			Golgi apparatus				0	0	0	0	0	0	0	0	0	0	0	0	0	0	0	0	0	0	0	0
INIP	58493	symbol	H. sapiens	58493	H. sapiens	INIP	INTS3 and NABP interacting protein	GO:0010212 response to ionizing radiation;GO:0006281 DNA repair;GO:0009314 response to radiation			Nucleus but not nucleoli				0	0	0	0	0	0	0	0	0	0	0	0	0	0	0	0	0	0	0	0
IPMK	253430	symbol	H. sapiens	253430	H. sapiens	IPMK	inositol polyphosphate multikinase	GO:0032958 inositol phosphate biosynthetic process;GO:0001841 neural tube formation;GO:0046173 polyol biosynthetic process		Enzymes/ENZYME proteins/Transferases	Nucleus				0	1	0	0	0	0	0	0	0	0	0	0	0	0	0	0	0	0	1	0
IQGAP3	128239	symbol	H. sapiens	128239	H. sapiens	IQGAP3	IQ motif containing GTPase activating protein 3	GO:0033601 positive regulation of mammary gland epithelial cell proliferation;GO:0033599 regulation of mammary gland epithelial cell proliferation;GO:0000187 activation of MAPK activity			Nucleoli		(M278)PID RAC1 PATHWAY; (M81)PID CDC42 PATHWAY		0	0	0	0	0	0	0	0	0	0	0	0	0	0	0	0	0	0	0	0
IRAK4	51135	symbol	H. sapiens	51135	H. sapiens	IRAK4	interleukin 1 receptor associated kinase 4	GO:0034162 toll-like receptor 9 signaling pathway;GO:0002755 MyD88-dependent toll-like receptor signaling pathway;GO:0002224 toll-like receptor signaling pathway	TKL Ser/Thr protein kinase family	Enzymes/{ENZYME proteins/Transferases,Kinases/TKL Ser/Thr protein kinases}	Cytoskeleton (Microtubules)	1-(3-HYDROXYPROPYL)-2-[(3-NITROBENZOYL)AMINO]-1H-BENZIMIDAZOL-5-YL PIVALATE (Protein serine/threonine kinase activity)	(M264)PID TOLL ENDOGENOUS PATHWAY; (M110)PID IL1 PATHWAY	(M5923)HALLMARK PI3K AKT MTOR SIGNALING	0	0	0	0	1	0	0	0	0	0	0	0	0	0	0	1	1	0	0	0
ISCA1	81689	symbol	H. sapiens	81689	H. sapiens	ISCA1	iron-sulfur cluster assembly 1	GO:0097428 protein maturation by iron-sulfur cluster transfer;GO:0016226 iron-sulfur cluster assembly;GO:0031163 metallo-sulfur cluster assembly						(M5936)HALLMARK OXIDATIVE PHOSPHORYLATION; (M5945)HALLMARK HEME METABOLISM	0	0	0	0	0	0	0	0	0	0	0	0	0	0	0	0	0	0	0	0
ISG20L2	81875	symbol	H. sapiens	81875	H. sapiens	ISG20L2	interferon stimulated exonuclease gene 20 like 2	GO:0090503 RNA phosphodiester bond hydrolysis, exonucleolytic;GO:0090501 RNA phosphodiester bond hydrolysis;GO:0006364 rRNA processing			Nucleus but not nucleoli			(M5906)HALLMARK ESTROGEN RESPONSE EARLY	0	0	0	1	0	0	0	0	0	0	0	0	0	0	0	0	0	0	0	0
ITFG2	55846	symbol	H. sapiens	55846	H. sapiens	ITFG2	integrin alpha FG-GAP repeat containing 2	GO:0002314 germinal center B cell differentiation;GO:0002313 mature B cell differentiation involved in immune response;GO:0002335 mature B cell differentiation			Nucleus but not nucleoli;Endoplasmic reticulum				0	0	0	0	0	1	0	0	0	0	0	0	0	0	0	0	1	0	0	0
ITGA2B	3674	symbol	H. sapiens	3674	H. sapiens	ITGA2B	integrin subunit alpha 2b	GO:0002576 platelet degranulation;GO:0070527 platelet aggregation;GO:0002687 positive regulation of leukocyte migration		CD markers	Nucleus but not nucleoli;Cytoplasm	Abciximab (Metal ion binding);Tirofiban (Metal ion binding);Lefradafiban (Metal ion binding)	(M47)PID INTEGRIN CS PATHWAY; (M257)PID EPHRINB REV PATHWAY; (M86)PID ARF6 PATHWAY		0	0	0	0	0	1	0	0	0	0	0	0	1	0	0	0	0	0	0	0
ITGB3	3690	symbol	H. sapiens	3690	H. sapiens	ITGB3	integrin subunit beta 3	GO:0045715 negative regulation of low-density lipoprotein particle receptor biosynthetic process;GO:0010745 negative regulation of macrophage derived foam cell differentiation;GO:0010871 negative regulation of receptor biosynthetic process		CD markers		Abciximab (Virus receptor activity);Eptifibatide (Virus receptor activity);Anti-thymocyte Globulin (Rabbit) (Virus receptor activity);Tirofiban (Virus receptor activity);Lefradafiban (Virus receptor activity);LM-609 (Virus receptor activity)	(M103)PID S1P S1P1 PATHWAY; (M47)PID INTEGRIN CS PATHWAY; (M55)PID S1P S1P3 PATHWAY	(M5897)HALLMARK IL6 JAK STAT3 SIGNALING; (M5946)HALLMARK COAGULATION; (M5942)HALLMARK UV RESPONSE DN	0	0	0	0	0	1	0	0	0	0	0	0	1	0	0	0	0	0	0	0
ITPKC	80271	symbol	H. sapiens	80271	H. sapiens	ITPKC	inositol-trisphosphate 3-kinase C	GO:0043647 inositol phosphate metabolic process;GO:0019751 polyol metabolic process;GO:0006066 alcohol metabolic process		Enzymes/ENZYME proteins/Transferases	Nucleus but not nucleoli				0	0	0	0	0	0	0	0	0	0	0	0	0	0	0	0	0	0	0	0
ITPRIPL2	162073	symbol	H. sapiens	162073	H. sapiens	ITPRIPL2	inositol 1,4,5-trisphosphate receptor interacting protein like 2				Centrosome				0	0	0	0	0	0	0	0	0	0	0	0	0	0	0	0	0	0	0	0
JAK1	3716	symbol	H. sapiens	3716	H. sapiens	JAK1	Janus kinase 1	GO:1903672 positive regulation of sprouting angiogenesis;GO:0038110 interleukin-2-mediated signaling pathway;GO:0060334 regulation of interferon-gamma-mediated signaling pathway	Tyr protein kinase family	Enzymes/{ENZYME proteins/Transferases,Kinases/Tyr protein kinases}		2-(1,1-DIMETHYLETHYL)9-FLUORO-3,6-DIHYDRO-7H-BENZ[H]-IMIDAZ[4,5-F]ISOQUINOLIN-7-ONE (Ubiquitin protein ligase binding);3-{(3R,4R)-4-methyl-3-[methyl(7H-pyrrolo[2,3-d]pyrimidin-4-yl)amino]piperidin-1-yl}-3-oxopropanenitrile (Ubiquitin protein ligase binding);Ruxolitinib (Ubiquitin protein ligase binding);Tofacitinib (Ubiquitin protein ligase binding)	(M17580)ST IL 13 PATHWAY; (M19336)ST TYPE I INTERFERON PATHWAY; (M5248)ST JAK STAT PATHWAY	(M5907)HALLMARK ESTROGEN RESPONSE LATE	0	0	0	0	1	0	0	0	0	0	1	0	0	0	0	0	1	0	0	0
JSRP1	126306	symbol	H. sapiens	126306	H. sapiens	JSRP1	junctional sarcoplasmic reticulum protein 1	GO:0060314 regulation of ryanodine-sensitive calcium-release channel activity;GO:0051279 regulation of release of sequestered calcium ion into cytosol;GO:0051209 release of sequestered calcium ion into cytosol			Endoplasmic reticulum				0	0	0	0	0	0	0	0	0	0	0	0	0	0	0	0	0	1	0	0
KBTBD6	89890	symbol	H. sapiens	89890	H. sapiens	KBTBD6	kelch repeat and BTB domain containing 6	GO:0016567 protein ubiquitination;GO:0032446 protein modification by small protein conjugation;GO:0070647 protein modification by small protein conjugation or removal							0	0	0	0	0	0	0	0	0	0	0	0	0	0	0	0	0	0	0	0
KCNG1	3755	symbol	H. sapiens	3755	H. sapiens	KCNG1	potassium voltage-gated channel modifier subfamily G member 1	GO:1902259 regulation of delayed rectifier potassium channel activity;GO:1901016 regulation of potassium ion transmembrane transporter activity;GO:1901379 regulation of potassium ion transmembrane transport		Voltage-gated ion channels/Voltage-Gated Potassium Channels	Vesicles				0	0	0	0	0	0	0	0	0	0	0	0	0	0	0	0	0	0	0	0
KCNJ5	3762	symbol	H. sapiens	3762	H. sapiens	KCNJ5	potassium voltage-gated channel subfamily J member 5	GO:0098914 membrane repolarization during atrial cardiac muscle cell action potential;GO:0086014 atrial cardiac muscle cell action potential;GO:0098915 membrane repolarization during ventricular cardiac muscle cell action potential		Transporters/Transporter channels and pores;Voltage-gated ion channels/Inwardly Rectifying Potassium Channels		Ethanol (G-protein activated inward rectifier potassium channel activity);Glyburide (G-protein activated inward rectifier potassium channel activity)	(M2701)ST MYOCYTE AD PATHWAY; (M18342)ST G ALPHA I PATHWAY; (M19043)ST ADRENERGIC		0	0	0	0	0	0	0	0	0	0	0	0	0	0	0	0	0	0	0	0
KCNMB1	3779	symbol	H. sapiens	3779	H. sapiens	KCNMB1	potassium calcium-activated channel subfamily M regulatory beta subunit 1	GO:1903413 cellular response to bile acid;GO:0045909 positive regulation of vasodilation;GO:1901381 positive regulation of potassium ion transmembrane transport		Transporters/Accessory Factors Involved in Transport		Miconazole (Potassium channel regulator activity)		(M5956)HALLMARK KRAS SIGNALING DN	0	0	0	0	0	0	0	0	0	0	0	0	0	0	0	0	0	0	0	0
KCNV1	27012	symbol	H. sapiens	27012	H. sapiens	KCNV1	potassium voltage-gated channel modifier subfamily V member 1	GO:0071805 potassium ion transmembrane transport;GO:0071804 cellular potassium ion transport;GO:0051260 protein homooligomerization		Voltage-gated ion channels/Voltage-Gated Potassium Channels					0	0	0	0	0	0	0	0	0	0	0	0	0	0	0	0	0	0	0	0
KCTD10	83892	symbol	H. sapiens	83892	H. sapiens	KCTD10	potassium channel tetramerization domain containing 10	GO:0043161 proteasome-mediated ubiquitin-dependent protein catabolic process;GO:0051260 protein homooligomerization;GO:0010498 proteasomal protein catabolic process			Nucleus but not nucleoli				0	0	0	0	0	0	0	0	0	0	0	0	0	0	0	0	0	0	0	0
KCTD7	154881	symbol	H. sapiens	154881	H. sapiens	KCTD7	potassium channel tetramerization domain containing 7	GO:0051260 protein homooligomerization;GO:0051259 protein oligomerization;GO:0006461 protein complex assembly							0	0	0	0	0	0	0	0	0	0	0	0	0	0	0	0	0	0	0	0
KDELR3	11015	symbol	H. sapiens	11015	H. sapiens	KDELR3	KDEL endoplasmic reticulum protein retention receptor 3	GO:0006621 protein retention in ER lumen;GO:0035437 maintenance of protein localization in endoplasmic reticulum;GO:0036498 IRE1-mediated unfolded protein response						(M5922)HALLMARK UNFOLDED PROTEIN RESPONSE; (M5937)HALLMARK GLYCOLYSIS; (M5891)HALLMARK HYPOXIA	0	0	0	0	0	0	0	0	0	0	0	0	0	0	0	0	0	0	0	0
KDM8	79831	symbol	H. sapiens	79831	H. sapiens	KDM8	lysine demethylase 8	GO:0070544 histone H3-K36 demethylation;GO:0070076 histone lysine demethylation;GO:0016577 histone demethylation		Enzymes/ENZYME proteins/Oxidoreductases	Nucleus but not nucleoli				0	0	0	0	0	0	0	0	0	0	0	1	0	0	0	0	0	0	0	0
KIF11	3832	symbol	H. sapiens	3832	H. sapiens	KIF11	kinesin family member 11	GO:0046602 regulation of mitotic centrosome separation;GO:0007100 mitotic centrosome separation;GO:0051299 centrosome separation			Cytoplasm	3-[(5s)-1-Acetyl-3-(2-Chlorophenyl)-4,5-Dihydro-1h-Pyrazol-5-Yl]Phenol (Protein kinase binding);Monastrol (Protein kinase binding);(4R)-4-(3-HYDROXYPHENYL)-N,N,7,8-TETRAMETHYL-3,4-DIHYDROISOQUINOLINE-2(1H)-CARBOXAMIDE (Protein kinase binding);N,N-DIETHYL-2-[(2-THIENYLCARBONYL)AMINO]-4,5,6,7-TETRAHYDRO-1-BENZOTHIOPHENE-3-CARBOXAMIDE (Protein kinase binding);(5R)-N,N-DIETHYL-5-METHYL-2-[(THIOPHEN-2…		(M5901)HALLMARK G2M CHECKPOINT; (M5893)HALLMARK MITOTIC SPINDLE	0	0	0	0	0	0	0	0	0	0	0	0	0	0	0	0	0	0	0	0
KIF15	56992	symbol	H. sapiens	56992	H. sapiens	KIF15	kinesin family member 15	GO:0019886 antigen processing and presentation of exogenous peptide antigen via MHC class II;GO:0002495 antigen processing and presentation of peptide antigen via MHC class II;GO:0002478 antigen processing and presentation of exogenous peptide antigen						(M5901)HALLMARK G2M CHECKPOINT; (M5893)HALLMARK MITOTIC SPINDLE	0	0	0	0	0	0	0	0	0	0	0	0	0	0	0	0	0	0	0	0
KIF1C	10749	symbol	H. sapiens	10749	H. sapiens	KIF1C	kinesin family member 1C	GO:0006890 retrograde vesicle-mediated transport, Golgi to ER;GO:0030705 cytoskeleton-dependent intracellular transport;GO:0007018 microtubule-based movement			Nucleus but not nucleoli				0	0	0	0	0	0	0	0	0	0	0	0	0	0	0	0	0	0	0	0
KIF3C	3797	symbol	H. sapiens	3797	H. sapiens	KIF3C	kinesin family member 3C	GO:0019886 antigen processing and presentation of exogenous peptide antigen via MHC class II;GO:0002495 antigen processing and presentation of peptide antigen via MHC class II;GO:0072384 organelle transport along microtubule			Nucleus;Nuclear membrane;Cytoskeleton (Intermediate filaments)			(M5893)HALLMARK MITOTIC SPINDLE	0	0	0	0	0	0	0	0	0	0	0	0	0	0	0	0	0	0	0	0
KIN	22944	symbol	H. sapiens	22944	H. sapiens	KIN	Kin17 DNA and RNA binding protein	GO:0016032 viral process;GO:0044403 symbiosis, encompassing mutualism through parasitism;GO:0006310 DNA recombination			Nucleus				0	0	0	0	0	0	0	0	0	0	0	0	0	0	0	0	0	0	0	0
KISS1R	84634	symbol	H. sapiens	84634	H. sapiens	KISS1R	KISS1 receptor	GO:0007200 phospholipase C-activating G-protein coupled receptor signaling pathway;GO:0007218 neuropeptide signaling pathway;GO:0007186 G-protein coupled receptor signaling pathway		G-protein coupled receptors/GPCRs excl olfactory receptors;Transporters	Plasma membrane				0	0	0	0	0	0	0	0	0	0	0	0	0	0	0	0	0	0	0	0
KLF17	128209	symbol	H. sapiens	128209	H. sapiens	KLF17	Kruppel like factor 17	GO:0000122 negative regulation of transcription from RNA polymerase II promoter;GO:0045892 negative regulation of transcription, DNA-templated;GO:1903507 negative regulation of nucleic acid-templated transcription		Transcription factors/Zinc-coordinating DNA-binding domains	Nucleus but not nucleoli;Golgi apparatus				0	0	0	0	0	0	0	0	0	0	0	0	0	0	0	0	0	0	0	0
KLHDC8A	55220	symbol	H. sapiens	55220	H. sapiens	KLHDC8A	kelch domain containing 8A	GO:0042787 protein ubiquitination involved in ubiquitin-dependent protein catabolic process;GO:0006511 ubiquitin-dependent protein catabolic process;GO:0019941 modification-dependent protein catabolic process						(M5956)HALLMARK KRAS SIGNALING DN	0	0	0	0	0	0	0	0	0	0	0	0	0	0	0	0	0	0	0	0
KLHL17	339451	symbol	H. sapiens	339451	H. sapiens	KLHL17	kelch like family member 17	GO:0007420 brain development;GO:0016567 protein ubiquitination;GO:0030036 actin cytoskeleton organization			Nucleus but not nucleoli				0	0	0	0	0	0	0	0	0	0	0	0	0	0	0	0	0	0	0	0
KLHL22	84861	symbol	H. sapiens	84861	H. sapiens	KLHL22	kelch like family member 22	GO:0007094 mitotic spindle assembly checkpoint;GO:0071174 mitotic spindle checkpoint;GO:0045841 negative regulation of mitotic metaphase/anaphase transition							0	0	0	0	0	0	0	0	0	0	0	0	0	0	0	0	0	0	0	0
KLHL23	151230	symbol	H. sapiens	151230	H. sapiens	KLHL23	kelch like family member 23	GO:0016567 protein ubiquitination;GO:0032446 protein modification by small protein conjugation;GO:0070647 protein modification by small protein conjugation or removal			Nucleus but not nucleoli;Cytoskeleton (Actin filaments)				0	0	0	0	0	0	0	0	0	0	0	0	0	0	0	0	0	0	0	0
KLHL24	54800	symbol	H. sapiens	54800	H. sapiens	KLHL24	kelch like family member 24	GO:2000312 regulation of kainate selective glutamate receptor activity;GO:1901016 regulation of potassium ion transmembrane transporter activity;GO:2000649 regulation of sodium ion transmembrane transporter activity						(M5891)HALLMARK HYPOXIA	0	0	0	0	0	0	0	0	0	0	0	0	0	0	0	0	0	0	0	0
KLHL26	55295	symbol	H. sapiens	55295	H. sapiens	KLHL26	kelch like family member 26	GO:0016567 protein ubiquitination;GO:0032446 protein modification by small protein conjugation;GO:0070647 protein modification by small protein conjugation or removal							0	0	0	0	0	0	0	0	0	0	0	0	0	0	0	0	0	0	0	0
KLHL42	57542	symbol	H. sapiens	57542	H. sapiens	KLHL42	kelch like family member 42	GO:0043161 proteasome-mediated ubiquitin-dependent protein catabolic process;GO:0000209 protein polyubiquitination;GO:0010498 proteasomal protein catabolic process							0	0	0	0	0	0	0	0	0	0	0	0	0	0	0	0	0	0	0	0
KLKB1	3818	symbol	H. sapiens	3818	H. sapiens	KLKB1	kallikrein B1	GO:0051919 positive regulation of fibrinolysis;GO:0002542 Factor XII activation;GO:0051917 regulation of fibrinolysis		Enzymes/{ENZYME proteins/Hydrolases,Peptidases/Serine-type peptidases}		Ecallantide (Serine-type endopeptidase activity);C1 Esterase Inhibitor (Human) (Serine-type endopeptidase activity);C1 Esterase Inhibitor (Recombinant) (Serine-type endopeptidase activity)		(M5946)HALLMARK COAGULATION; (M5921)HALLMARK COMPLEMENT	0	0	0	0	0	0	0	0	0	1	0	0	1	1	0	0	0	0	0	0
KMO	8564	symbol	H. sapiens	8564	H. sapiens	KMO	kynurenine 3-monooxygenase	GO:0019441 tryptophan catabolic process to kynurenine;GO:0006569 tryptophan catabolic process;GO:0019805 quinolinate biosynthetic process		Enzymes/ENZYME proteins/Oxidoreductases					1	1	0	0	0	0	0	1	0	0	0	1	0	0	0	0	0	0	1	0
KRR1	11103	symbol	H. sapiens	11103	H. sapiens	KRR1	KRR1, small subunit processome component homolog	GO:0000462 maturation of SSU-rRNA from tricistronic rRNA transcript (SSU-rRNA, 5.8S rRNA, LSU-rRNA);GO:0030490 maturation of SSU-rRNA;GO:0042274 ribosomal small subunit biogenesis			Nucleoli				0	0	0	1	0	0	0	0	0	0	0	0	0	0	0	0	0	0	0	0
KRT6A	3853	symbol	H. sapiens	3853	H. sapiens	KRT6A	keratin 6A	GO:0045104 intermediate filament cytoskeleton organization;GO:0045103 intermediate filament-based process;GO:0007010 cytoskeleton organization							0	0	0	0	0	0	0	0	0	0	0	0	0	0	0	0	0	0	0	0
KRT7	3855	symbol	H. sapiens	3855	H. sapiens	KRT7	keratin 7	GO:0016032 viral process;GO:0044403 symbiosis, encompassing mutualism through parasitism;GO:0044764 multi-organism cellular process			Nucleus but not nucleoli	Primaquine (Structural molecule activity);HspE7 (Structural molecule activity)			0	0	0	0	0	0	0	0	0	0	0	0	0	0	0	0	0	0	0	0
KSR1	8844	symbol	H. sapiens	8844	H. sapiens	KSR1	kinase suppressor of ras 1	GO:0019933 cAMP-mediated signaling;GO:0019935 cyclic-nucleotide-mediated signaling;GO:0043410 positive regulation of MAPK cascade	TKL Ser/Thr protein kinase family	Enzymes/Kinases/TKL Ser/Thr protein kinases;RAS pathway related proteins			(M144)PID CERAMIDE PATHWAY; (M164)PID ERBB1 DOWNSTREAM PATHWAY; (M186)PID PDGFRB PATHWAY		0	0	0	0	0	0	0	0	0	0	0	0	0	0	0	0	0	0	0	0
L2HGDH	79944	symbol	H. sapiens	79944	H. sapiens	L2HGDH	L-2-hydroxyglutarate dehydrogenase	GO:0006103 2-oxoglutarate metabolic process;GO:0043648 dicarboxylic acid metabolic process;GO:0019752 carboxylic acid metabolic process		Enzymes/ENZYME proteins/Oxidoreductases	Mitochondria				0	1	0	0	0	0	0	0	0	0	0	1	0	0	0	0	0	0	0	0
L3MBTL2	83746	symbol	H. sapiens	83746	H. sapiens	L3MBTL2	L3MBTL2 polycomb repressive complex 1 subunit	GO:0016925 protein sumoylation;GO:0018205 peptidyl-lysine modification;GO:0016569 covalent chromatin modification			Nucleus but not nucleoli				0	0	0	0	0	0	0	0	0	0	0	0	0	0	0	0	0	0	0	0
LAD1	3898	symbol	H. sapiens	3898	H. sapiens	LAD1	ladinin 1	GO:0098609 cell-cell adhesion;GO:0007155 cell adhesion;GO:0022610 biological adhesion			Cytoskeleton (Actin filaments)			(M5906)HALLMARK ESTROGEN RESPONSE EARLY	0	0	0	0	0	0	0	0	0	0	0	0	0	0	0	0	0	0	0	0
LAPTM5	7805	symbol	H. sapiens	7805	H. sapiens	LAPTM5	lysosomal protein transmembrane 5	GO:0006810 transport;GO:0051234 establishment of localization;GO:0051179 localization		Transporters/Electrochemical Potential-driven transporters				(M5953)HALLMARK KRAS SIGNALING UP	0	0	1	0	0	0	0	0	0	0	0	0	0	0	0	0	0	0	0	0
LDHD	197257	symbol	H. sapiens	197257	H. sapiens	LDHD	lactate dehydrogenase D	GO:0055114 oxidation-reduction process;GO:0044710 single-organism metabolic process;GO:0008152 metabolic process		Enzymes/ENZYME proteins/Oxidoreductases	Cytoplasm				0	0	0	0	0	0	0	0	0	0	0	1	0	0	0	0	0	0	0	0
LDLRAP1	26119	symbol	H. sapiens	26119	H. sapiens	LDLRAP1	low density lipoprotein receptor adaptor protein 1	GO:1905602 positive regulation of receptor-mediated endocytosis involved in cholesterol transport;GO:1905600 regulation of receptor-mediated endocytosis involved in cholesterol transport;GO:0032385 positive regulation of intracellular cholesterol transport			Cytoskeleton (Microtubules)			(M5915)HALLMARK APICAL JUNCTION	0	1	0	0	0	0	0	0	0	0	0	0	0	0	0	0	0	0	0	0
LECT2	3950	symbol	H. sapiens	3950	H. sapiens	LECT2	leukocyte cell derived chemotaxin 2	GO:0001501 skeletal system development;GO:0006935 chemotaxis;GO:0042330 taxis					(M195)PID CMYB PATHWAY		0	0	0	0	0	0	0	0	0	0	0	0	0	0	0	0	0	0	0	0
LEP	3952	symbol	H. sapiens	3952	H. sapiens	LEP	leptin	GO:2000486 negative regulation of glutamine transport;GO:0033686 positive regulation of luteinizing hormone secretion;GO:2000366 positive regulation of STAT protein import into nucleus					(M50)PID PTP1B PATHWAY; (M255)PID HIF1 TFPATHWAY; (M5883)NABA SECRETED FACTORS	(M5905)HALLMARK ADIPOGENESIS	1	1	0	0	1	1	1	0	0	1	0	1	0	0	0	1	1	0	0	0
LGALS3BP	3959	symbol	H. sapiens	3959	H. sapiens	LGALS3BP	galectin 3 binding protein	GO:0002576 platelet degranulation;GO:0006968 cellular defense response;GO:0045055 regulated exocytosis			Nucleus but not nucleoli;Vesicles			(M5911)HALLMARK INTERFERON ALPHA RESPONSE; (M5913)HALLMARK INTERFERON GAMMA RESPONSE	0	0	0	0	0	0	0	0	0	0	0	0	0	0	0	0	0	0	0	0
LGI3	203190	symbol	H. sapiens	203190	H. sapiens	LGI3	leucine rich repeat LGI family member 3	GO:0017157 regulation of exocytosis;GO:0006887 exocytosis;GO:1903530 regulation of secretion by cell			Cytoplasm		(M3008)NABA ECM GLYCOPROTEINS; (M5884)NABA CORE MATRISOME; (M5889)NABA MATRISOME		0	0	0	0	0	0	0	0	0	0	0	0	0	0	0	0	0	0	0	0
LHFPL1	340596	symbol	H. sapiens	340596	H. sapiens	LHFPL1	lipoma HMGIC fusion partner-like 1								0	0	0	0	0	0	0	0	0	0	0	0	0	0	0	0	0	0	0	0
LHFPL2	10184	symbol	H. sapiens	10184	H. sapiens	LHFPL2	lipoma HMGIC fusion partner-like 2	GO:0008150 biological_process			Cytoskeleton (Actin filaments)				0	0	0	0	0	0	0	0	0	0	0	0	0	0	0	0	0	0	0	0
LHFPL4	375323	symbol	H. sapiens	375323	H. sapiens	LHFPL4	lipoma HMGIC fusion partner-like 4				Golgi apparatus				0	0	0	0	0	0	0	0	0	0	0	0	0	0	0	0	0	0	0	0
LHPP	64077	symbol	H. sapiens	64077	H. sapiens	LHPP	phospholysine phosphohistidine inorganic pyrophosphate phosphatase	GO:0009168 purine ribonucleoside monophosphate biosynthetic process;GO:0009127 purine nucleoside monophosphate biosynthetic process;GO:0009156 ribonucleoside monophosphate biosynthetic process		Enzymes/ENZYME proteins/Hydrolases	Nucleus			(M5937)HALLMARK GLYCOLYSIS	0	0	0	0	0	0	0	0	0	0	0	0	0	0	0	0	0	0	1	0
LIPA	3988	symbol	H. sapiens	3988	H. sapiens	LIPA	lipase A, lysosomal acid type	GO:0048873 homeostasis of number of cells within a tissue;GO:0030324 lung development;GO:0001894 tissue homeostasis		Enzymes/ENZYME proteins/Hydrolases				(M5921)HALLMARK COMPLEMENT	1	1	1	0	0	0	0	0	0	1	0	0	0	0	0	1	0	0	0	0
LIX1	167410	symbol	H. sapiens	167410	H. sapiens	LIX1	limb and CNS expressed 1	GO:0097352 autophagosome maturation;GO:0097576 vacuole fusion;GO:0007033 vacuole organization							0	0	0	0	0	0	0	0	0	0	0	0	0	0	0	0	0	0	0	0
LIX1L	128077	symbol	H. sapiens	128077	H. sapiens	LIX1L	limb and CNS expressed 1 like	GO:0097352 autophagosome maturation;GO:0097576 vacuole fusion;GO:0007033 vacuole organization			Cytoplasm				0	0	0	0	0	0	0	0	0	0	0	0	0	0	0	0	0	0	0	0
LMBR1	64327	symbol	H. sapiens	64327	H. sapiens	LMBR1	limb development membrane protein 1	GO:0042733 embryonic digit morphogenesis;GO:0030326 embryonic limb morphogenesis;GO:0035113 embryonic appendage morphogenesis			Cytoplasm				0	0	0	0	0	0	0	0	0	0	0	0	0	0	0	0	0	0	0	0
LMF2	91289	symbol	H. sapiens	91289	H. sapiens	LMF2	lipase maturation factor 2	GO:0051604 protein maturation;GO:0010467 gene expression;GO:0019538 protein metabolic process			Centrosome				0	1	0	0	0	0	0	0	0	0	0	0	0	0	0	0	0	0	0	0
LMNB2	84823	symbol	H. sapiens	84823	H. sapiens	LMNB2	lamin B2	GO:0008150 biological_process			Nuclear membrane		(M220)PID CASPASE PATHWAY		0	0	0	0	0	0	0	0	0	0	0	0	0	0	0	0	0	0	0	0
LMTK2	22853	symbol	H. sapiens	22853	H. sapiens	LMTK2	lemur tyrosine kinase 2	GO:0033572 transferrin transport;GO:0015682 ferric iron transport;GO:0045022 early endosome to late endosome transport	Tyr protein kinase family	Enzymes/{ENZYME proteins/Transferases,Kinases/Tyr protein kinases}	Microtubule organizing center				0	0	0	0	0	0	0	0	0	0	0	0	0	0	0	0	0	0	0	0
LNX2	222484	symbol	H. sapiens	222484	H. sapiens	LNX2	ligand of numb-protein X 2	GO:0051260 protein homooligomerization;GO:0051259 protein oligomerization;GO:0006461 protein complex assembly			Vesicles				0	0	0	0	0	0	0	0	0	0	0	0	0	0	0	0	0	0	0	0
LOXL2	4017	symbol	H. sapiens	4017	H. sapiens	LOXL2	lysyl oxidase like 2	GO:0018277 protein deamination;GO:0032332 positive regulation of chondrocyte differentiation;GO:0061036 positive regulation of cartilage development		Enzymes/ENZYME proteins/Oxidoreductases	Nucleus but not nucleoli		(M3468)NABA ECM REGULATORS; (M5885)NABA MATRISOME ASSOCIATED; (M5889)NABA MATRISOME	(M5930)HALLMARK EPITHELIAL MESENCHYMAL TRANSITION	0	0	0	0	0	0	0	0	0	0	0	1	0	0	0	0	0	0	0	0
LPAR3	23566	symbol	H. sapiens	23566	H. sapiens	LPAR3	lysophosphatidic acid receptor 3	GO:0048672 positive regulation of collateral sprouting;GO:0048670 regulation of collateral sprouting;GO:0051482 positive regulation of cytosolic calcium ion concentration involved in phospholipase C-activating G-protein coupled signaling pathway		G-protein coupled receptors/{GPCRs excl olfactory receptors,Lysolipids receptors}			(M15)PID LYSOPHOSPHOLIPID PATHWAY		0	0	0	0	0	0	0	0	0	0	0	0	0	0	0	0	0	1	0	0
LPIN2	9663	symbol	H. sapiens	9663	H. sapiens	LPIN2	lipin 2	GO:0006646 phosphatidylethanolamine biosynthetic process;GO:0019432 triglyceride biosynthetic process;GO:0006656 phosphatidylcholine biosynthetic process		Enzymes/ENZYME proteins/Hydrolases	Cytoplasm			(M5945)HALLMARK HEME METABOLISM; (M5934)HALLMARK XENOBIOTIC METABOLISM	1	1	0	0	0	0	0	0	0	0	0	0	0	0	0	0	0	0	1	0
LPXN	9404	symbol	H. sapiens	9404	H. sapiens	LPXN	leupaxin	GO:0050859 negative regulation of B cell receptor signaling pathway;GO:0050855 regulation of B cell receptor signaling pathway;GO:0050858 negative regulation of antigen receptor-mediated signaling pathway			Cytoplasm				0	0	0	0	0	1	0	0	0	0	0	0	0	0	0	0	0	0	0	0
LRP11	84918	symbol	H. sapiens	84918	H. sapiens	LRP11	LDL receptor related protein 11	GO:0035902 response to immobilization stress;GO:0009414 response to water deprivation;GO:0033555 multicellular organismal response to stress			Mitochondria				0	0	0	0	0	0	0	0	0	0	0	0	0	0	0	0	0	0	0	0
LRRC10	376132	symbol	H. sapiens	376132	H. sapiens	LRRC10	leucine rich repeat containing 10	GO:0055013 cardiac muscle cell development;GO:0055006 cardiac cell development;GO:0055007 cardiac muscle cell differentiation			Nucleus but not nucleoli				0	0	0	0	0	0	0	0	0	0	0	0	0	0	0	0	0	0	0	0
LRRC14	9684	symbol	H. sapiens	9684	H. sapiens	LRRC14	leucine rich repeat containing 14				Nucleus but not nucleoli				0	0	0	0	0	0	0	0	0	0	0	0	0	0	0	0	0	0	0	0
LRRC20	55222	symbol	H. sapiens	55222	H. sapiens	LRRC20	leucine rich repeat containing 20				Nucleus but not nucleoli				0	0	0	0	0	0	0	0	0	0	0	0	0	0	0	0	0	0	0	0
LRRC45	201255	symbol	H. sapiens	201255	H. sapiens	LRRC45	leucine rich repeat containing 45				Cytoplasm;Centrosome				0	0	0	0	0	0	0	0	0	0	0	0	0	0	0	0	0	0	0	0
LRRC58	116064	symbol	H. sapiens	116064	H. sapiens	LRRC58	leucine rich repeat containing 58				Nucleus				0	0	0	0	0	0	0	0	0	0	0	0	0	0	0	0	0	0	0	0
LRRC69	100130742	symbol	H. sapiens	100130742	H. sapiens	LRRC69	leucine rich repeat containing 69				Plasma membrane				0	0	0	0	0	0	0	0	0	0	0	0	0	0	0	0	0	0	0	0
LRRC8A	56262	symbol	H. sapiens	56262	H. sapiens	LRRC8A	leucine rich repeat containing 8 family member A	GO:0002329 pre-B cell differentiation;GO:0002327 immature B cell differentiation;GO:0030183 B cell differentiation		Transporters/Transporter channels and pores	Nucleus but not nucleoli				0	0	0	0	0	1	0	0	0	0	0	0	0	0	0	0	0	1	0	0
LTBR	4055	symbol	H. sapiens	4055	H. sapiens	LTBR	lymphotoxin beta receptor	GO:0043011 myeloid dendritic cell differentiation;GO:0046330 positive regulation of JNK cascade;GO:2001238 positive regulation of extrinsic apoptotic signaling pathway			Golgi apparatus			(M5897)HALLMARK IL6 JAK STAT3 SIGNALING	0	0	0	0	1	1	0	0	0	1	0	0	0	0	0	0	1	0	0	0
LTF	4057	symbol	H. sapiens	4057	H. sapiens	LTF	lactotransferrin	GO:1900159 positive regulation of bone mineralization involved in bone maturation;GO:0034145 positive regulation of toll-like receptor 4 signaling pathway;GO:0033214 iron assimilation by chelation and transport				3h-Indole-5,6-Diol (Serine-type endopeptidase activity);Lauric Acid (Serine-type endopeptidase activity);Nitrilotriacetic Acid (Serine-type endopeptidase activity);Alpha-D-Fucose (Serine-type endopeptidase activity);Nimesulide (Serine-type endopeptidase activity);2-(4-(2-HYDROXY-3-(ISOPROPYLAMINO)PROPOXY)PHENYL)ETHANAMIDE (Serine-type endopeptidase activity);Parecoxib (Serine-type endopeptidase a…		(M5921)HALLMARK COMPLEMENT; (M5907)HALLMARK ESTROGEN RESPONSE LATE	0	0	0	0	0	0	0	0	1	1	0	0	0	0	0	1	1	1	0	0
LY6D	8581	symbol	H. sapiens	8581	H. sapiens	LY6D	lymphocyte antigen 6 complex, locus D	GO:0035634 response to stilbenoid;GO:0030098 lymphocyte differentiation;GO:0002521 leukocyte differentiation							0	0	0	0	0	1	0	0	0	0	0	0	0	0	0	0	0	0	0	0
LY6E	4061	symbol	H. sapiens	4061	H. sapiens	LY6E	lymphocyte antigen 6 complex, locus E	GO:0007166 cell surface receptor signaling pathway;GO:0007165 signal transduction;GO:0044700 single organism signaling						(M5911)HALLMARK INTERFERON ALPHA RESPONSE; (M5913)HALLMARK INTERFERON GAMMA RESPONSE; (M5932)HALLMARK INFLAMMATORY RESPONSE	0	0	0	0	0	0	0	0	0	0	0	0	0	0	0	0	0	0	0	0
LY6G6C	80740	symbol	H. sapiens	80740	H. sapiens	LY6G6C	lymphocyte antigen 6 complex, locus G6C								0	0	0	0	0	0	0	0	0	0	0	0	0	0	0	0	0	0	0	0
LYG2	254773	symbol	H. sapiens	254773	H. sapiens	LYG2	lysozyme g2	GO:0009253 peptidoglycan catabolic process;GO:0000270 peptidoglycan metabolic process;GO:0006027 glycosaminoglycan catabolic process							0	0	0	0	0	0	0	1	0	0	0	0	0	0	0	0	0	0	0	0
LYPLAL1	127018	symbol	H. sapiens	127018	H. sapiens	LYPLAL1	lysophospholipase like 1	GO:0002084 protein depalmitoylation;GO:0098734 macromolecule depalmitoylation;GO:0042159 lipoprotein catabolic process			Cytoplasm				0	0	0	0	0	0	0	0	0	0	0	0	0	0	0	0	0	0	0	0
LYRM2	57226	symbol	H. sapiens	57226	H. sapiens	LYRM2	LYR motif containing 2				Cytoplasm				0	0	0	0	0	0	0	0	0	0	0	0	0	0	0	0	0	0	0	0
LYRM9	201229	symbol	H. sapiens	201229	H. sapiens	LYRM9	LYR motif containing 9								0	0	0	0	0	0	0	0	0	0	0	0	0	0	0	0	0	0	0	0
LYVE1	10894	symbol	H. sapiens	10894	H. sapiens	LYVE1	lymphatic vessel endothelial hyaluronan receptor 1	GO:0030214 hyaluronan catabolic process;GO:0030212 hyaluronan metabolic process;GO:0006027 glycosaminoglycan catabolic process							0	0	0	0	0	0	0	1	0	0	0	0	0	0	0	0	0	0	0	0
LZTS1	11178	symbol	H. sapiens	11178	H. sapiens	LZTS1	leucine zipper tumor suppressor 1	GO:0048814 regulation of dendrite morphogenesis;GO:0016242 negative regulation of macroautophagy;GO:0050773 regulation of dendrite development			Plasma membrane				0	0	0	0	0	0	0	0	0	0	0	0	0	0	0	0	0	0	0	0
MAB21L3	126868	symbol	H. sapiens	126868	H. sapiens	MAB21L3	mab-21 like 3								0	0	0	0	0	0	0	0	0	0	0	0	0	0	0	0	0	0	0	0
MALL	7851	symbol	H. sapiens	7851	H. sapiens	MALL	mal, T-cell differentiation protein like	GO:0001766 membrane raft polarization;GO:0031580 membrane raft distribution;GO:0051665 membrane raft localization						(M5953)HALLMARK KRAS SIGNALING UP	0	0	0	0	0	0	0	0	0	0	0	0	0	0	0	0	0	0	0	0
MAN1B1	11253	symbol	H. sapiens	11253	H. sapiens	MAN1B1	mannosidase alpha class 1B member 1	GO:0036509 trimming of terminal mannose on B branch;GO:1904382 mannose trimming involved in glycoprotein ERAD pathway;GO:1904380 endoplasmic reticulum mannose trimming		Enzymes/ENZYME proteins/Hydrolases	Vesicles	1,4-Butanediol (Mannosyl-oligosaccharide 1,2-alpha-mannosidase activity);Methyl-2-S-(Alpha-D-Mannopyranosyl)-2-Thio-Alpha-D-Mannopyranoside (Mannosyl-oligosaccharide 1,2-alpha-mannosidase activity);Kifunensine (Mannosyl-oligosaccharide 1,2-alpha-mannosidase activity);Duvoglustat (Mannosyl-oligosaccharide 1,2-alpha-mannosidase activity)			1	0	0	0	0	0	1	1	0	0	0	0	0	0	0	0	0	0	0	1
MANBA	4126	symbol	H. sapiens	4126	H. sapiens	MANBA	mannosidase beta	GO:0009313 oligosaccharide catabolic process;GO:0009311 oligosaccharide metabolic process;GO:0044724 single-organism carbohydrate catabolic process		Enzymes/ENZYME proteins/Hydrolases					1	0	1	0	0	0	1	0	1	0	0	0	0	0	0	0	0	0	0	0
MAP1S	55201	symbol	H. sapiens	55201	H. sapiens	MAP1S	microtubule associated protein 1S	GO:0010848 regulation of chromatin disassembly;GO:0047497 mitochondrion transport along microtubule;GO:0034643 establishment of mitochondrion localization, microtubule-mediated			Cytoplasm			(M5893)HALLMARK MITOTIC SPINDLE	0	0	0	0	0	0	0	0	0	0	0	0	0	0	0	0	0	0	0	0
MAP3K14	9020	symbol	H. sapiens	9020	H. sapiens	MAP3K14	mitogen-activated protein kinase kinase kinase 14	GO:0031295 T cell costimulation;GO:0050870 positive regulation of T cell activation;GO:0000186 activation of MAPKK activity	STE Ser/Thr protein kinase family	Enzymes/{ENZYME proteins/Transferases,Kinases/STE Ser/Thr protein kinases}			(M63)PID AVB3 OPN PATHWAY; (M45)PID CD40 PATHWAY; (M197)PID HIV NEF PATHWAY		0	0	0	0	1	1	0	0	0	0	1	0	0	0	0	0	0	0	0	0
MAPK4	5596	symbol	H. sapiens	5596	H. sapiens	MAPK4	mitogen-activated protein kinase 4	GO:0000165 MAPK cascade;GO:0023014 signal transduction by protein phosphorylation;GO:0006468 protein phosphorylation	CMGC Ser/Thr protein kinase family	Enzymes/{ENZYME proteins/Transferases,Kinases/CMGC Ser/Thr protein kinases}					0	0	0	0	0	0	0	0	0	0	0	0	0	0	0	0	0	0	0	0
MASP1	5648	symbol	H. sapiens	5648	H. sapiens	MASP1	mannan binding lectin serine peptidase 1	GO:0001867 complement activation, lectin pathway;GO:0006956 complement activation;GO:0072376 protein activation cascade		Enzymes/Peptidases/Serine-type peptidases	Nucleus but not nucleoli;Cytoplasm		(M3468)NABA ECM REGULATORS; (M5885)NABA MATRISOME ASSOCIATED; (M5889)NABA MATRISOME		0	0	0	0	0	0	0	0	0	0	0	0	1	0	0	0	1	0	0	0
MBL2	4153	symbol	H. sapiens	4153	H. sapiens	MBL2	mannose binding lectin 2	GO:0044130 negative regulation of growth of symbiont in host;GO:0051873 killing by host of symbiont cells;GO:0044146 negative regulation of growth of symbiont involved in interaction with host				O3-Sulfonylgalactose (Receptor binding);Methyl alpha-D-mannoside (Receptor binding);O4-Sulfonylgalactose (Receptor binding);beta-L-methyl-fucose (Receptor binding);N-acetyl-alpha-neuraminic acid (Receptor binding);alpha-L-methyl-fucose (Receptor binding);Alpha-Methyl-N-Acetyl-D-Glucosamine (Receptor binding)	(M5880)NABA ECM AFFILIATED; (M5885)NABA MATRISOME ASSOCIATED; (M5889)NABA MATRISOME	(M5946)HALLMARK COAGULATION; (M5934)HALLMARK XENOBIOTIC METABOLISM; (M5950)HALLMARK ALLOGRAFT REJECTION	0	0	0	0	0	0	0	0	0	1	0	0	1	1	0	0	1	0	0	0
MBLAC1	255374	symbol	H. sapiens	255374	H. sapiens	MBLAC1	metallo-beta-lactamase domain containing 1								0	0	0	0	0	0	0	0	0	0	0	0	0	0	0	0	0	0	0	0
MCAT	27349	symbol	H. sapiens	27349	H. sapiens	MCAT	malonyl-CoA-acyl carrier protein transacylase	GO:0006633 fatty acid biosynthetic process;GO:0072330 monocarboxylic acid biosynthetic process;GO:0006631 fatty acid metabolic process		Enzymes/ENZYME proteins/Transferases		3,6,9,12,15-PENTAOXAHEPTADECAN-1-OL (Transferase activity)			0	1	0	0	0	0	0	0	0	0	0	0	0	0	0	0	0	0	0	0
MCM3AP	8888	symbol	H. sapiens	8888	H. sapiens	MCM3AP	minichromosome maintenance complex component 3 associated protein	GO:0051028 mRNA transport;GO:0006606 protein import into nucleus;GO:1902593 single-organism nuclear import		Transporters/Transporter channels and pores	Nuclear membrane;Cytoplasm				0	0	0	0	0	0	0	0	0	0	0	0	0	0	0	0	0	0	0	0
MDM2	4193	symbol	H. sapiens	4193	H. sapiens	MDM2	MDM2 proto-oncogene	GO:0071301 cellular response to vitamin B1;GO:0006977 DNA damage response, signal transduction by p53 class mediator resulting in cell cycle arrest;GO:0072431 signal transduction involved in mitotic G1 DNA damage checkpoint			Nucleus	Cis-[4,5-Bis-(4-Bromophenyl)-2-(2-Ethoxy-4-Methoxyphenyl)-4,5-Dihydroimidazol-1-Yl]-[4-(2-Hydroxyethyl)Piperazin-1-Yl]Methanone (Zinc ion binding);Cis-[4,5-Bis-(4-Chlorophenyl)-2-(2-Isopropoxy-4-Methoxyphenyl)-4,5-Dihyd Roimidazol-1-Yl]-Piperazin-1-Yl-Methanone (Zinc ion binding)	(M140)PID RANBP2 PATHWAY; (M1529)SA G1 AND S PHASES; (M242)PID AURORA A PATHWAY	(M5939)HALLMARK P53 PATHWAY	0	0	0	0	0	0	0	0	0	0	1	0	0	0	0	0	0	0	0	0
MED10	84246	symbol	H. sapiens	84246	H. sapiens	MED10	mediator complex subunit 10	GO:0006367 transcription initiation from RNA polymerase II promoter;GO:0019827 stem cell population maintenance;GO:0006352 DNA-templated transcription, initiation			Nucleus but not nucleoli				0	1	0	0	0	0	0	0	0	0	0	0	0	0	0	0	0	0	0	0
MED17	9440	symbol	H. sapiens	9440	H. sapiens	MED17	mediator complex subunit 17	GO:0030521 androgen receptor signaling pathway;GO:0030518 intracellular steroid hormone receptor signaling pathway;GO:0006367 transcription initiation from RNA polymerase II promoter			Vesicles				0	1	0	0	0	0	0	0	0	0	0	0	0	0	0	0	0	0	0	0
MED28	80306	symbol	H. sapiens	80306	H. sapiens	MED28	mediator complex subunit 28	GO:0051151 negative regulation of smooth muscle cell differentiation;GO:0051150 regulation of smooth muscle cell differentiation;GO:0051148 negative regulation of muscle cell differentiation			Nucleus but not nucleoli;Plasma membrane;Cytoplasm				0	1	0	0	0	0	0	0	0	0	0	0	0	0	0	0	0	0	0	0
MED29	55588	symbol	H. sapiens	55588	H. sapiens	MED29	mediator complex subunit 29	GO:0006355 regulation of transcription, DNA-templated;GO:1903506 regulation of nucleic acid-templated transcription;GO:0006351 transcription, DNA-templated			Nucleus but not nucleoli				0	1	0	0	0	0	0	0	0	0	0	0	0	0	0	0	0	0	0	0
MED4	29079	symbol	H. sapiens	29079	H. sapiens	MED4	mediator complex subunit 4	GO:0030521 androgen receptor signaling pathway;GO:0030518 intracellular steroid hormone receptor signaling pathway;GO:0006367 transcription initiation from RNA polymerase II promoter			Nucleus but not nucleoli				0	1	0	0	0	0	0	0	0	0	0	0	0	0	0	0	0	0	0	0
MED9	55090	symbol	H. sapiens	55090	H. sapiens	MED9	mediator complex subunit 9	GO:0006357 regulation of transcription from RNA polymerase II promoter;GO:0006366 transcription from RNA polymerase II promoter;GO:0006355 regulation of transcription, DNA-templated			Nucleus but not nucleoli				0	1	0	0	0	0	0	0	0	0	0	0	0	0	0	0	0	0	0	0
MERTK	10461	symbol	H. sapiens	10461	H. sapiens	MERTK	MER proto-oncogene, tyrosine kinase	GO:0097350 neutrophil clearance;GO:0060068 vagina development;GO:0001779 natural killer cell differentiation	Tyr protein kinase family	Enzymes/{ENZYME proteins/Transferases,Kinases/Tyr protein kinases}		2-(2-HYDROXYETHYLAMINO)-6-(3-CHLOROANILINO)-9-ISOPROPYLPURINE (Transmembrane receptor protein tyrosine kinase activity)		(M5908)HALLMARK ANDROGEN RESPONSE; (M5937)HALLMARK GLYCOLYSIS	0	0	0	0	0	1	0	0	0	0	0	0	1	0	0	1	0	0	0	0
METTL15	196074	symbol	H. sapiens	196074	H. sapiens	METTL15	methyltransferase like 15	GO:0070475 rRNA base methylation;GO:0031167 rRNA methylation;GO:0000154 rRNA modification			Plasma membrane;Golgi apparatus				0	0	0	1	0	0	0	0	0	0	0	0	0	0	0	0	0	0	0	0
METTL21A	151194	symbol	H. sapiens	151194	H. sapiens	METTL21A	methyltransferase like 21A	GO:0043462 regulation of ATPase activity;GO:0018022 peptidyl-lysine methylation;GO:0006479 protein methylation			Nucleus				0	0	0	0	0	0	0	0	0	0	0	0	0	0	0	0	0	0	0	0
METTL21C	196541	symbol	H. sapiens	196541	H. sapiens	METTL21C	methyltransferase like 21C	GO:0018022 peptidyl-lysine methylation;GO:0006479 protein methylation;GO:0008213 protein alkylation							0	0	0	0	0	0	0	0	0	0	0	0	0	0	0	0	0	0	0	0
MFSD1	64747	symbol	H. sapiens	64747	H. sapiens	MFSD1	major facilitator superfamily domain containing 1	GO:0055085 transmembrane transport;GO:0006810 transport;GO:0051234 establishment of localization			Nucleus				0	0	0	0	0	0	0	0	0	0	0	0	0	0	0	0	0	0	0	0
MFSD11	79157	symbol	H. sapiens	79157	H. sapiens	MFSD11	major facilitator superfamily domain containing 11	GO:0008150 biological_process			Nucleus but not nucleoli				0	0	0	0	0	0	0	0	0	0	0	0	0	0	0	0	0	0	0	0
MGME1	92667	symbol	H. sapiens	92667	H. sapiens	MGME1	mitochondrial genome maintenance exonuclease 1	GO:0043504 mitochondrial DNA repair;GO:0006264 mitochondrial DNA replication;GO:0032042 mitochondrial DNA metabolic process			Mitochondria				0	0	0	0	0	0	0	0	0	0	0	0	0	0	0	0	0	0	0	0
MICALL1	85377	symbol	H. sapiens	85377	H. sapiens	MICALL1	MICAL like 1	GO:0032458 slow endocytic recycling;GO:0036010 protein localization to endosome;GO:1990126 retrograde transport, endosome to plasma membrane			Focal Adhesions				0	0	0	0	0	0	0	0	0	0	0	0	0	0	0	0	0	0	0	0
MICU2	221154	symbol	H. sapiens	221154	H. sapiens	MICU2	mitochondrial calcium uptake 2	GO:0051562 negative regulation of mitochondrial calcium ion concentration;GO:0051561 positive regulation of mitochondrial calcium ion concentration;GO:0036444 mitochondrial calcium uptake		Transporters/Accessory Factors Involved in Transport	Nucleus				0	0	0	0	0	0	0	0	0	0	0	0	0	0	0	0	0	1	0	0
MIIP	60672	symbol	H. sapiens	60672	H. sapiens	MIIP	migration and invasion inhibitory protein	GO:0010972 negative regulation of G2/M transition of mitotic cell cycle;GO:1902750 negative regulation of cell cycle G2/M phase transition;GO:0010389 regulation of G2/M transition of mitotic cell cycle			Nucleus but not nucleoli				0	0	0	0	0	0	0	0	0	0	0	0	0	0	0	0	0	0	0	0
MIS12	79003	symbol	H. sapiens	79003	H. sapiens	MIS12	MIS12, kinetochore complex component	GO:0051315 attachment of mitotic spindle microtubules to kinetochore;GO:0034501 protein localization to kinetochore;GO:0051382 kinetochore assembly							0	0	0	0	0	0	0	0	0	0	0	0	0	0	0	0	0	0	0	0
MIS18A	54069	symbol	H. sapiens	54069	H. sapiens	MIS18A	MIS18 kinetochore protein A	GO:0034080 CENP-A containing nucleosome assembly;GO:1903955 positive regulation of protein targeting to mitochondrion;GO:0044030 regulation of DNA methylation			Nucleus;Cytoplasm				0	0	0	0	0	0	0	0	0	0	0	0	0	0	0	0	0	0	0	0
MIS18BP1	55320	symbol	H. sapiens	55320	H. sapiens	MIS18BP1	MIS18 binding protein 1	GO:0034080 CENP-A containing nucleosome assembly;GO:0006336 DNA replication-independent nucleosome assembly;GO:0031055 chromatin remodeling at centromere			Nucleoli;Cytoplasm				0	0	0	0	0	0	0	0	0	0	0	0	0	0	0	0	0	0	0	0
MLC1	23209	symbol	H. sapiens	23209	H. sapiens	MLC1	megalencephalic leukoencephalopathy with subcortical cysts 1	GO:0071397 cellular response to cholesterol;GO:0072584 caveolin-mediated endocytosis;GO:0070723 response to cholesterol		Transporters					0	0	0	0	0	0	0	0	0	0	0	0	0	0	0	0	0	0	0	0
MLN	4295	symbol	H. sapiens	4295	H. sapiens	MLN	motilin	GO:0007267 cell-cell signaling;GO:0007186 G-protein coupled receptor signaling pathway;GO:0007165 signal transduction							0	0	0	0	0	0	0	0	0	0	0	0	0	0	0	0	0	0	0	0
MLPH	79083	symbol	H. sapiens	79083	H. sapiens	MLPH	melanophilin	GO:0030050 vesicle transport along actin filament;GO:0099515 actin filament-based transport;GO:0099518 vesicle cytoskeletal trafficking						(M5906)HALLMARK ESTROGEN RESPONSE EARLY	0	0	0	0	0	0	0	0	0	0	0	0	0	0	0	0	0	0	0	0
MMAA	166785	symbol	H. sapiens	166785	H. sapiens	MMAA	methylmalonic aciduria (cobalamin deficiency) cblA type	GO:0019626 short-chain fatty acid catabolic process;GO:0009236 cobalamin biosynthetic process;GO:0046459 short-chain fatty acid metabolic process			Cytoplasm	Cyanocobalamin (Hydrolase activity);Hydroxocobalamin (Hydrolase activity)			1	1	0	0	0	0	0	0	0	0	0	0	0	0	0	0	0	0	0	0
MMACHC	25974	symbol	H. sapiens	25974	H. sapiens	MMACHC	methylmalonic aciduria (cobalamin deficiency) cblC type, with homocystinuria	GO:0009236 cobalamin biosynthetic process;GO:0009235 cobalamin metabolic process;GO:0042364 water-soluble vitamin biosynthetic process			Nucleus	Cyanocobalamin (Cobalamin binding);Hydroxocobalamin (Cobalamin binding)			0	1	0	0	0	0	0	0	0	0	0	1	0	0	0	0	0	0	0	0
MMP12	4321	symbol	H. sapiens	4321	H. sapiens	MMP12	matrix metallopeptidase 12	GO:0035313 wound healing, spreading of epidermal cells;GO:0044319 wound healing, spreading of cells;GO:0060054 positive regulation of epithelial cell proliferation involved in wound healing		Enzymes/{ENZYME proteins/Hydrolases,Peptidases/Metallopeptidases}		Acetohydroxamic Acid (Zinc ion binding);Marimastat (Zinc ion binding);CP-271485 (Zinc ion binding);PF-00356231 (Zinc ion binding);Batimastat (Zinc ion binding);2-[2-(1,3-Dioxo-1,3-Dihydro-2h-Isoindol-2-Yl)Ethyl]-4-(4'-Ethoxy-1,1'-Biphenyl-4-Yl)-4-Oxobutanoic Acid (Zinc ion binding);AE-941 (Zinc ion binding);(1S,5S,7R)-N~7~-(BIPHENYL-4-YLMETHYL)-N~3~-HYDROXY-6,8-DIOXA-3-AZABICYCLO[3.2.1]OCTANE-3,7…	(M174)PID UPA UPAR PATHWAY; (M3468)NABA ECM REGULATORS; (M5885)NABA MATRISOME ASSOCIATED	(M5921)HALLMARK COMPLEMENT	1	0	0	0	0	0	0	0	0	0	0	0	0	0	0	0	0	0	0	0
MMP15	4324	symbol	H. sapiens	4324	H. sapiens	MMP15	matrix metallopeptidase 15	GO:0035987 endodermal cell differentiation;GO:0030574 collagen catabolic process;GO:0001706 endoderm formation		Enzymes/Peptidases/Metallopeptidases	Nucleus;Cytoplasm	Marimastat (Zinc ion binding)	(M3468)NABA ECM REGULATORS; (M5885)NABA MATRISOME ASSOCIATED; (M5889)NABA MATRISOME	(M5946)HALLMARK COAGULATION; (M5921)HALLMARK COMPLEMENT	1	0	0	0	0	0	0	0	0	0	0	0	0	0	0	0	0	0	0	0
MMP7	4316	symbol	H. sapiens	4316	H. sapiens	MMP7	matrix metallopeptidase 7	GO:0044849 estrous cycle;GO:0030574 collagen catabolic process;GO:0060135 maternal process involved in female pregnancy		Enzymes/{ENZYME proteins/Hydrolases,Peptidases/Metallopeptidases}	Nucleus but not nucleoli;Vesicles	Marimastat (Zinc ion binding);(1R)-N,6-DIHYDROXY-7-METHOXY-2-[(4-METHOXYPHENYL)SULFONYL]-1,2,3,4-TETRAHYDROISOQUINOLINE-1-CARBOXAMIDE (Zinc ion binding);N4-HYDROXY-2-ISOBUTYL-N1-(9-OXO-1,8-DIAZA-TRICYCLO[10.6.1.013,18]NONADECA-12(19),13,15,17-TETRAEN-10-YL)-SUCCINAMIDE (Zinc ion binding);5-METHYL-3-(9-OXO-1,8-DIAZA-TRICYCLO[10.6.1.013,18]NONADECA-12(19),13,15,17-TETRAEN-10-YLCARBAMOYL)-HEXANOIC A…	(M198)PID SYNDECAN 1 PATHWAY; (M142)PID AJDISS 2PATHWAY; (M153)PID P75 NTR PATHWAY	(M5946)HALLMARK COAGULATION	1	0	0	0	0	0	0	0	0	0	0	0	0	0	0	0	0	0	0	0
MOB3B	79817	symbol	H. sapiens	79817	H. sapiens	MOB3B	MOB kinase activator 3B								0	0	0	0	0	0	0	0	0	0	0	0	0	0	0	0	0	0	0	0
MPDU1	9526	symbol	H. sapiens	9526	H. sapiens	MPDU1	mannose-P-dolichol utilization defect 1	GO:0006488 dolichol-linked oligosaccharide biosynthetic process;GO:0009312 oligosaccharide biosynthetic process;GO:0006490 oligosaccharide-lipid intermediate biosynthetic process			Endoplasmic reticulum				0	0	0	0	0	0	1	0	0	0	0	0	0	0	0	0	0	0	0	1
MPP1	4354	symbol	H. sapiens	4354	H. sapiens	MPP1	membrane palmitoylated protein 1	GO:0090022 regulation of neutrophil chemotaxis;GO:0046710 GDP metabolic process;GO:1902622 regulation of neutrophil migration			Nucleoli;Nucleus but not nucleoli			(M5945)HALLMARK HEME METABOLISM	0	0	0	0	0	0	0	0	0	1	0	0	0	0	0	0	0	0	1	0
MRAP2	112609	symbol	H. sapiens	112609	H. sapiens	MRAP2	melanocortin 2 receptor accessory protein 2	GO:0030819 positive regulation of cAMP biosynthetic process;GO:0030816 positive regulation of cAMP metabolic process;GO:0030817 regulation of cAMP biosynthetic process							0	0	0	0	0	0	0	0	0	0	0	1	0	0	0	0	0	0	1	1
MRAS	22808	symbol	H. sapiens	22808	H. sapiens	MRAS	muscle RAS oncogene homolog	GO:0007265 Ras protein signal transduction;GO:0007517 muscle organ development;GO:0030036 actin cytoskeleton organization		RAS pathway related proteins	Vesicles		(M3270)ST INTEGRIN SIGNALING PATHWAY	(M5909)HALLMARK MYOGENESIS	0	0	0	0	0	0	0	0	0	0	0	0	0	0	0	0	0	0	0	0
MREG	55686	symbol	H. sapiens	55686	H. sapiens	MREG	melanoregulin	GO:0032402 melanosome transport;GO:0032401 establishment of melanosome localization;GO:0051904 pigment granule transport						(M5906)HALLMARK ESTROGEN RESPONSE EARLY	0	0	0	0	0	0	0	0	0	0	0	0	0	0	0	0	0	0	0	0
MRPL10	124995	symbol	H. sapiens	124995	H. sapiens	MRPL10	mitochondrial ribosomal protein L10	GO:0070126 mitochondrial translational termination;GO:0070125 mitochondrial translational elongation;GO:0006415 translational termination		Ribosomal proteins	Mitochondria				0	0	0	1	0	0	0	0	0	0	0	0	0	0	0	0	0	0	0	0
MRPL15	29088	symbol	H. sapiens	29088	H. sapiens	MRPL15	mitochondrial ribosomal protein L15	GO:0070126 mitochondrial translational termination;GO:0070125 mitochondrial translational elongation;GO:0006415 translational termination		Ribosomal proteins				(M5905)HALLMARK ADIPOGENESIS; (M5936)HALLMARK OXIDATIVE PHOSPHORYLATION	0	0	0	0	0	0	0	0	0	0	0	0	0	0	0	0	0	0	0	0
MRPL19	9801	symbol	H. sapiens	9801	H. sapiens	MRPL19	mitochondrial ribosomal protein L19	GO:0070126 mitochondrial translational termination;GO:0070125 mitochondrial translational elongation;GO:0006415 translational termination		Ribosomal proteins					0	0	0	0	0	0	0	0	0	0	0	0	0	0	0	0	0	0	0	0
MRPL34	64981	symbol	H. sapiens	64981	H. sapiens	MRPL34	mitochondrial ribosomal protein L34	GO:0070126 mitochondrial translational termination;GO:0070125 mitochondrial translational elongation;GO:0006415 translational termination		Ribosomal proteins	Nucleus			(M5936)HALLMARK OXIDATIVE PHOSPHORYLATION	0	0	0	0	0	0	0	0	0	0	0	0	0	0	0	0	0	0	0	0
MRPL50	54534	symbol	H. sapiens	54534	H. sapiens	MRPL50	mitochondrial ribosomal protein L50	GO:0070126 mitochondrial translational termination;GO:0070125 mitochondrial translational elongation;GO:0006415 translational termination			Cytoplasm				0	0	0	0	0	0	0	0	0	0	0	0	0	0	0	0	0	0	0	0
MRPL51	51258	symbol	H. sapiens	51258	H. sapiens	MRPL51	mitochondrial ribosomal protein L51	GO:0070126 mitochondrial translational termination;GO:0070125 mitochondrial translational elongation;GO:0006415 translational termination			Mitochondria				0	0	0	0	0	0	0	0	0	0	0	0	0	0	0	0	0	0	0	0
MRPL54	116541	symbol	H. sapiens	116541	H. sapiens	MRPL54	mitochondrial ribosomal protein L54	GO:0070126 mitochondrial translational termination;GO:0070125 mitochondrial translational elongation;GO:0006415 translational termination			Mitochondria				0	0	0	0	0	0	0	0	0	0	0	0	0	0	0	0	0	0	0	0
MRPL9	65005	symbol	H. sapiens	65005	H. sapiens	MRPL9	mitochondrial ribosomal protein L9	GO:0070126 mitochondrial translational termination;GO:0070125 mitochondrial translational elongation;GO:0006415 translational termination		Ribosomal proteins	Mitochondria			(M5926)HALLMARK MYC TARGETS V1	0	0	0	0	0	0	0	0	0	0	0	0	0	0	0	0	0	0	0	0
MRPS18A	55168	symbol	H. sapiens	55168	H. sapiens	MRPS18A	mitochondrial ribosomal protein S18A	GO:0070126 mitochondrial translational termination;GO:0070125 mitochondrial translational elongation;GO:0006415 translational termination		Ribosomal proteins					0	0	0	0	0	0	0	0	0	0	0	0	0	0	0	0	0	0	0	0
MRPS2	51116	symbol	H. sapiens	51116	H. sapiens	MRPS2	mitochondrial ribosomal protein S2	GO:0032543 mitochondrial translation;GO:0007005 mitochondrion organization;GO:0006412 translation		Ribosomal proteins	Mitochondria				0	0	0	0	0	0	0	0	0	0	0	0	0	0	0	0	0	0	0	0
MRTO4	51154	symbol	H. sapiens	51154	H. sapiens	MRTO4	MRT4 homolog, ribosome maturation factor	GO:0000027 ribosomal large subunit assembly;GO:0000956 nuclear-transcribed mRNA catabolic process;GO:0042255 ribosome assembly		Ribosomal proteins	Nucleus			(M5928)HALLMARK MYC TARGETS V2	0	0	0	1	0	0	0	0	0	0	0	0	0	0	0	0	0	0	0	0
MS4A1	931	symbol	H. sapiens	931	H. sapiens	MS4A1	membrane spanning 4-domains A1	GO:0042100 B cell proliferation;GO:0046651 lymphocyte proliferation;GO:0042113 B cell activation		CD markers;Transporters/Transporter channels and pores		Rituximab (Mhc class ii protein complex binding);Ibritumomab tiuxetan (Mhc class ii protein complex binding);Tositumomab (Mhc class ii protein complex binding);Ofatumumab (Mhc class ii protein complex binding);Obinutuzumab (Mhc class ii protein complex binding)			0	0	0	0	0	1	0	0	0	0	0	0	0	0	0	0	0	0	0	0
MSC	9242	symbol	H. sapiens	9242	H. sapiens	MSC	musculin	GO:0014707 branchiomeric skeletal muscle development;GO:0060539 diaphragm development;GO:0007519 skeletal muscle tissue development		Transcription factors/Basic domains	Nucleus but not nucleoli			(M5890)HALLMARK TNFA SIGNALING VIA NFKB	0	0	0	0	0	0	0	0	0	0	0	0	0	0	0	0	0	0	0	0
MSRB1	51734	symbol	H. sapiens	51734	H. sapiens	MSRB1	methionine sulfoxide reductase B1	GO:0030091 protein repair;GO:0030041 actin filament polymerization;GO:0008154 actin polymerization or depolymerization			Nucleus but not nucleoli			(M5921)HALLMARK COMPLEMENT	0	0	0	0	0	0	0	0	0	0	0	1	0	0	0	0	1	0	0	0
MT2A	4502	symbol	H. sapiens	4502	H. sapiens	MT2A	metallothionein 2A	GO:0036018 cellular response to erythropoietin;GO:0036016 cellular response to interleukin-3;GO:0006878 cellular copper ion homeostasis					(M167)PID AP1 PATHWAY	(M5913)HALLMARK INTERFERON GAMMA RESPONSE; (M5901)HALLMARK G2M CHECKPOINT; (M5934)HALLMARK XENOBIOTIC METABOLISM	0	0	0	0	1	0	0	0	0	0	0	0	0	0	0	0	1	1	0	0
MT3	4504	symbol	H. sapiens	4504	H. sapiens	MT3	metallothionein 3	GO:0097214 positive regulation of lysosomal membrane permeability;GO:0097213 regulation of lysosomal membrane permeability;GO:2000296 negative regulation of hydrogen peroxide catabolic process			Nucleus but not nucleoli			(M5921)HALLMARK COMPLEMENT	1	0	0	0	1	0	0	0	0	1	0	1	0	0	0	0	0	1	0	1
MTF1	4520	symbol	H. sapiens	4520	H. sapiens	MTF1	metal regulatory transcription factor 1	GO:0046686 response to cadmium ion;GO:0045944 positive regulation of transcription from RNA polymerase II promoter;GO:0010038 response to metal ion		Transcription factors/Zinc-coordinating DNA-binding domains	Nucleus but not nucleoli				0	1	0	0	0	0	0	0	0	0	0	0	0	0	0	0	0	0	0	0
MTG1	92170	symbol	H. sapiens	92170	H. sapiens	MTG1	mitochondrial ribosome associated GTPase 1	GO:0044065 regulation of respiratory system process;GO:0070129 regulation of mitochondrial translation;GO:0043576 regulation of respiratory gaseous exchange							0	0	0	1	0	0	0	0	0	0	0	0	0	0	0	0	0	0	0	0
MTG2	26164	symbol	H. sapiens	26164	H. sapiens	MTG2	mitochondrial ribosome associated GTPase 2	GO:0044065 regulation of respiratory system process;GO:0070129 regulation of mitochondrial translation;GO:0043576 regulation of respiratory gaseous exchange							0	0	0	1	0	0	0	0	0	0	0	0	0	0	0	0	0	0	0	0
MTMR12	54545	symbol	H. sapiens	54545	H. sapiens	MTMR12	myotubularin related protein 12	GO:1901998 toxin transport;GO:0050790 regulation of catalytic activity;GO:0065009 regulation of molecular function							0	0	0	0	0	0	0	0	0	0	0	0	0	0	0	0	0	0	0	0
MUC1	4582	symbol	H. sapiens	4582	H. sapiens	MUC1	mucin 1, cell surface associated	GO:0006977 DNA damage response, signal transduction by p53 class mediator resulting in cell cycle arrest;GO:0090240 positive regulation of histone H4 acetylation;GO:0072431 signal transduction involved in mitotic G1 DNA damage checkpoint		CD markers	Plasma membrane;Vesicles		(M5880)NABA ECM AFFILIATED; (M5885)NABA MATRISOME ASSOCIATED; (M5889)NABA MATRISOME	(M5947)HALLMARK IL2 STAT5 SIGNALING; (M5906)HALLMARK ESTROGEN RESPONSE EARLY	0	0	0	0	0	1	0	0	0	0	0	0	0	0	0	0	0	0	0	1
MUM1	84939	symbol	H. sapiens	84939	H. sapiens	MUM1	melanoma associated antigen (mutated) 1	GO:0006281 DNA repair;GO:0006974 cellular response to DNA damage stimulus;GO:0006325 chromatin organization			Nucleus;Cytoplasm				0	0	0	0	0	0	0	0	0	0	0	0	0	0	0	0	0	0	0	0
MX1	4599	symbol	H. sapiens	4599	H. sapiens	MX1	MX dynamin like GTPase 1	GO:0045071 negative regulation of viral genome replication;GO:0060337 type I interferon signaling pathway;GO:0045069 regulation of viral genome replication			Nuclear membrane;Cytoplasm			(M5911)HALLMARK INTERFERON ALPHA RESPONSE; (M5956)HALLMARK KRAS SIGNALING DN; (M5913)HALLMARK INTERFERON GAMMA RESPONSE	0	0	0	0	1	0	0	0	0	0	0	0	0	0	0	0	1	0	0	0
MYBL2	4605	symbol	H. sapiens	4605	H. sapiens	MYBL2	MYB proto-oncogene like 2	GO:0043525 positive regulation of neuron apoptotic process;GO:0090307 mitotic spindle assembly;GO:1902850 microtubule cytoskeleton organization involved in mitosis		Transcription factors/Helix-turn-helix domains	Nucleus but not nucleoli		(M40)PID E2F PATHWAY	(M5901)HALLMARK G2M CHECKPOINT; (M5925)HALLMARK E2F TARGETS	0	0	0	0	0	0	0	0	0	0	0	0	0	0	0	0	0	0	0	0
MYOZ3	91977	symbol	H. sapiens	91977	H. sapiens	MYOZ3	myozenin 3	GO:0030239 myofibril assembly;GO:0055002 striated muscle cell development;GO:0031032 actomyosin structure organization							0	0	0	0	0	0	0	0	0	0	0	0	0	0	0	0	0	0	0	0
MYSM1	114803	symbol	H. sapiens	114803	H. sapiens	MYSM1	Myb like, SWIRM and MPN domains 1	GO:0035522 monoubiquitinated histone H2A deubiquitination;GO:0035521 monoubiquitinated histone deubiquitination;GO:0051797 regulation of hair follicle development		Enzymes/Peptidases/Metallopeptidases	Nucleus but not nucleoli				0	0	0	0	0	0	0	0	0	0	0	0	0	0	0	0	0	0	0	0
MZB1	51237	symbol	H. sapiens	51237	H. sapiens	MZB1	marginal zone B and B1 cell specific protein	GO:2001274 negative regulation of glucose import in response to insulin stimulus;GO:0002642 positive regulation of immunoglobulin biosynthetic process;GO:0002640 regulation of immunoglobulin biosynthetic process							0	0	0	0	0	1	0	0	0	0	0	0	0	0	0	0	1	0	0	0
N4BP1	9683	symbol	H. sapiens	9683	H. sapiens	N4BP1	NEDD4 binding protein 1	GO:0032435 negative regulation of proteasomal ubiquitin-dependent protein catabolic process;GO:1901799 negative regulation of proteasomal protein catabolic process;GO:1903051 negative regulation of proteolysis involved in cellular protein catabolic process			Nucleoli				0	0	0	0	0	0	0	0	0	0	0	0	0	0	0	0	0	0	0	0
NANOS2	339345	symbol	H. sapiens	339345	H. sapiens	NANOS2	nanos C2HC-type zinc finger 2	GO:1900153 positive regulation of nuclear-transcribed mRNA catabolic process, deadenylation-dependent decay;GO:1900151 regulation of nuclear-transcribed mRNA catabolic process, deadenylation-dependent decay;GO:0061014 positive regulation of mRNA catabolic process							0	0	0	0	0	0	0	0	0	0	0	0	0	0	0	0	0	0	0	0
NARFL	64428	symbol	H. sapiens	64428	H. sapiens	NARFL	nuclear prelamin A recognition factor like	GO:0032364 oxygen homeostasis;GO:0033483 gas homeostasis;GO:0016226 iron-sulfur cluster assembly			Cytoplasm				0	0	0	0	0	0	0	0	0	0	0	0	0	0	0	0	0	0	0	0
NATD1	256302	symbol	H. sapiens	256302	H. sapiens	NATD1	N-acetyltransferase domain containing 1								0	0	0	0	0	0	0	0	0	0	0	0	0	0	0	0	0	0	0	0
NCAN	1463	symbol	H. sapiens	1463	H. sapiens	NCAN	neurocan	GO:0030208 dermatan sulfate biosynthetic process;GO:0030207 chondroitin sulfate catabolic process;GO:0030205 dermatan sulfate metabolic process			Vesicles	Beta-D-Glucose (Hyaluronic acid binding);Thiodigalactoside (Hyaluronic acid binding);Hyaluronic acid (Hyaluronic acid binding)	(M251)PID SYNDECAN 3 PATHWAY; (M5882)NABA PROTEOGLYCANS; (M5884)NABA CORE MATRISOME	(M5891)HALLMARK HYPOXIA	1	1	0	0	0	0	0	1	0	0	0	0	0	0	0	0	0	0	0	1
NCAPD3	23310	symbol	H. sapiens	23310	H. sapiens	NCAPD3	non-SMC condensin II complex subunit D3	GO:0010032 meiotic chromosome condensation;GO:0007076 mitotic chromosome condensation;GO:0030261 chromosome condensation							0	0	0	0	0	0	0	0	0	0	0	0	0	0	0	0	0	0	0	0
NCEH1	57552	symbol	H. sapiens	57552	H. sapiens	NCEH1	neutral cholesterol ester hydrolase 1	GO:0006805 xenobiotic metabolic process;GO:0071466 cellular response to xenobiotic stimulus;GO:0009410 response to xenobiotic stimulus			Endoplasmic reticulum				1	1	0	0	0	0	0	0	0	0	0	0	0	0	0	0	0	0	0	0
NCOA5	57727	symbol	H. sapiens	57727	H. sapiens	NCOA5	nuclear receptor coactivator 5	GO:0046627 negative regulation of insulin receptor signaling pathway;GO:1900077 negative regulation of cellular response to insulin stimulus;GO:0046626 regulation of insulin receptor signaling pathway			Nucleus;Cytoskeleton (Actin filaments)	(16ALPHA,17ALPHA)-ESTRA-1,3,5(10)-TRIENE-3,16,17-TRIOL (Poly(a) rna binding)			0	0	0	0	0	0	0	0	0	0	0	0	0	0	0	0	0	0	0	0
NDUFAF4	29078	symbol	H. sapiens	29078	H. sapiens	NDUFAF4	NADH:ubiquinone oxidoreductase complex assembly factor 4	GO:0032981 mitochondrial respiratory chain complex I assembly;GO:0010257 NADH dehydrogenase complex assembly;GO:0097031 mitochondrial respiratory chain complex I biogenesis			Mitochondria			(M5928)HALLMARK MYC TARGETS V2	0	0	0	0	0	0	0	0	0	0	0	0	0	0	0	0	0	0	0	0
NDUFAF6	137682	symbol	H. sapiens	137682	H. sapiens	NDUFAF6	NADH:ubiquinone oxidoreductase complex assembly factor 6	GO:0032981 mitochondrial respiratory chain complex I assembly;GO:0010257 NADH dehydrogenase complex assembly;GO:0097031 mitochondrial respiratory chain complex I biogenesis			Plasma membrane;Cytoplasm				0	0	0	0	0	0	0	0	0	0	0	0	0	0	0	0	0	0	0	0
NDUFB10	4716	symbol	H. sapiens	4716	H. sapiens	NDUFB10	NADH:ubiquinone oxidoreductase subunit B10	GO:0006120 mitochondrial electron transport, NADH to ubiquinone;GO:0042775 mitochondrial ATP synthesis coupled electron transport;GO:0042773 ATP synthesis coupled electron transport				NADH (Nadh dehydrogenase (ubiquinone) activity)			0	0	0	0	0	0	0	0	0	0	0	1	0	0	0	0	0	0	1	0
NEK8	284086	symbol	H. sapiens	284086	H. sapiens	NEK8	NIMA related kinase 8	GO:0035330 regulation of hippo signaling;GO:0035329 hippo signaling;GO:0007368 determination of left/right symmetry	NEK Ser/Thr protein kinase family	Enzymes/{ENZYME proteins/Transferases,Kinases/NEK Ser/Thr protein kinases}	Cytoskeleton (Microtubules)				0	0	0	0	0	0	0	0	0	0	0	0	0	0	0	0	0	0	0	0
NELFCD	51497	symbol	H. sapiens	51497	H. sapiens	NELFCD	negative elongation factor complex member C/D	GO:0050434 positive regulation of viral transcription;GO:0046782 regulation of viral transcription;GO:1903902 positive regulation of viral life cycle			Nucleus but not nucleoli			(M5898)HALLMARK DNA REPAIR	0	0	0	0	0	0	0	0	0	0	0	0	0	0	0	0	0	0	0	0
NEU3	10825	symbol	H. sapiens	10825	H. sapiens	NEU3	neuraminidase 3	GO:0006689 ganglioside catabolic process;GO:0046479 glycosphingolipid catabolic process;GO:0046514 ceramide catabolic process		Enzymes/ENZYME proteins/Hydrolases					1	1	0	0	0	0	1	1	0	0	0	0	0	0	0	0	0	0	0	0
NFATC2IP	84901	symbol	H. sapiens	84901	H. sapiens	NFATC2IP	nuclear factor of activated T-cells 2 interacting protein	GO:0016925 protein sumoylation;GO:0045944 positive regulation of transcription from RNA polymerase II promoter;GO:0018205 peptidyl-lysine modification			Nucleus				0	0	0	0	0	0	0	0	0	0	0	0	0	0	0	1	0	0	0	0
NFE2L3	9603	symbol	H. sapiens	9603	H. sapiens	NFE2L3	nuclear factor, erythroid 2 like 3	GO:0000122 negative regulation of transcription from RNA polymerase II promoter;GO:0045892 negative regulation of transcription, DNA-templated;GO:0045893 positive regulation of transcription, DNA-templated		Transcription factors/Basic domains	Nucleus but not nucleoli;Vesicles				0	0	0	0	0	0	0	0	0	0	0	0	0	0	0	0	0	0	0	0
NICN1	84276	symbol	H. sapiens	84276	H. sapiens	NICN1	nicolin 1								0	0	0	0	0	0	0	0	0	0	0	0	0	0	0	0	0	0	0	0
NIFK	84365	symbol	H. sapiens	84365	H. sapiens	NIFK	nucleolar protein interacting with the FHA domain of MKI67	GO:0010923 negative regulation of phosphatase activity;GO:0009303 rRNA transcription;GO:0035305 negative regulation of dephosphorylation			Nucleoli				0	0	0	1	0	0	0	0	0	0	0	0	0	0	0	0	0	0	0	0
NKG7	4818	symbol	H. sapiens	4818	H. sapiens	NKG7	natural killer cell granule protein 7				Vesicles				0	0	0	0	0	0	0	0	0	0	0	0	0	0	0	0	0	0	0	0
NLE1	54475	symbol	H. sapiens	54475	H. sapiens	NLE1	notchless homolog 1	GO:2001268 negative regulation of cysteine-type endopeptidase activity involved in apoptotic signaling pathway;GO:0001826 inner cell mass cell differentiation;GO:2001267 regulation of cysteine-type endopeptidase activity involved in apoptotic signaling pathway			Nucleoli				0	0	0	1	0	0	0	0	0	0	0	0	0	0	0	0	0	0	0	0
NLRP3	114548	symbol	H. sapiens	114548	H. sapiens	NLRP3	NLR family pyrin domain containing 3	GO:2000321 positive regulation of T-helper 17 cell differentiation;GO:0045630 positive regulation of T-helper 2 cell differentiation;GO:2000319 regulation of T-helper 17 cell differentiation						(M5950)HALLMARK ALLOGRAFT REJECTION; (M5932)HALLMARK INFLAMMATORY RESPONSE	0	0	0	0	0	1	0	0	0	1	0	0	0	1	0	1	1	0	0	0
NMRK1	54981	symbol	H. sapiens	54981	H. sapiens	NMRK1	nicotinamide riboside kinase 1	GO:0009435 NAD biosynthetic process;GO:0019359 nicotinamide nucleotide biosynthetic process;GO:0019363 pyridine nucleotide biosynthetic process		Enzymes/ENZYME proteins/Transferases	Nucleus but not nucleoli;Cytoplasm				0	0	0	0	0	0	0	0	0	0	0	0	0	0	0	0	0	0	1	0
NMUR2	56923	symbol	H. sapiens	56923	H. sapiens	NMUR2	neuromedin U receptor 2	GO:0043006 activation of phospholipase A2 activity by calcium-mediated signaling;GO:0032431 activation of phospholipase A2 activity;GO:0032430 positive regulation of phospholipase A2 activity		G-protein coupled receptors/GPCRs excl olfactory receptors					0	0	0	0	0	0	0	0	0	0	0	0	0	0	0	0	0	1	0	0
NOB1	28987	symbol	H. sapiens	28987	H. sapiens	NOB1	NIN1/PSMD8 binding protein 1 homolog	GO:0000469 cleavage involved in rRNA processing;GO:0030490 maturation of SSU-rRNA;GO:0090502 RNA phosphodiester bond hydrolysis, endonucleolytic			Cytoplasm				0	0	0	1	0	0	0	0	0	0	0	0	0	0	0	0	0	0	0	0
NOD1	10392	symbol	H. sapiens	10392	H. sapiens	NOD1	nucleotide binding oligomerization domain containing 1	GO:0070423 nucleotide-binding oligomerization domain containing signaling pathway;GO:1904417 positive regulation of xenophagy;GO:0002606 positive regulation of dendritic cell antigen processing and presentation						(M5923)HALLMARK PI3K AKT MTOR SIGNALING; (M5913)HALLMARK INTERFERON GAMMA RESPONSE	0	0	0	0	0	0	0	0	0	1	0	0	0	0	0	1	1	0	0	0
NOL10	79954	symbol	H. sapiens	79954	H. sapiens	NOL10	nucleolar protein 10				Nucleoli				0	0	0	0	0	0	0	0	0	0	0	0	0	0	0	0	0	0	0	0
NOL12	79159	symbol	H. sapiens	79159	H. sapiens	NOL12	nucleolar protein 12				Nucleoli				0	0	0	0	0	0	0	0	0	0	0	0	0	0	0	0	0	0	0	0
NOS3	4846	symbol	H. sapiens	4846	H. sapiens	NOS3	nitric oxide synthase 3	GO:0031284 positive regulation of guanylate cyclase activity;GO:0014740 negative regulation of muscle hyperplasia;GO:0031282 regulation of guanylate cyclase activity		Enzymes/ENZYME proteins/Oxidoreductases		L-Arginine (Tetrahydrobiopterin binding);L-Citrulline (Tetrahydrobiopterin binding);Sapropterin (Tetrahydrobiopterin binding);Miconazole (Tetrahydrobiopterin binding);N,N-dimethylarginine (Tetrahydrobiopterin binding);L-N(Omega)-Nitroarginine-2,4-L-Diaminobutyric Amide (Tetrahydrobiopterin binding);L-2-Amino-4-(Guanidinooxy)Butyric Acid (Tetrahydrobiopterin binding);3-Bromo-7-Nitroindazole (Tetra…	(M226)PID VEGFR1 PATHWAY; (M65)PID FRA PATHWAY; (M41)PID ER NONGENOMIC PATHWAY		1	1	0	0	0	1	0	1	0	1	0	1	1	0	0	0	1	1	1	1
NPC1	4864	symbol	H. sapiens	4864	H. sapiens	NPC1	NPC intracellular cholesterol transporter 1	GO:2000189 positive regulation of cholesterol homeostasis;GO:2000188 regulation of cholesterol homeostasis;GO:0046718 viral entry into host cell		Transporters/Electrochemical Potential-driven transporters				(M5948)HALLMARK BILE ACID METABOLISM; (M5934)HALLMARK XENOBIOTIC METABOLISM	0	1	1	0	0	0	0	0	0	0	0	0	0	0	0	0	0	0	0	1
NPHP4	261734	symbol	H. sapiens	261734	H. sapiens	NPHP4	nephrocystin 4	GO:1903348 positive regulation of bicellular tight junction assembly;GO:2000810 regulation of bicellular tight junction assembly;GO:0035845 photoreceptor cell outer segment organization							0	0	0	0	0	1	0	0	0	0	0	0	0	0	0	0	0	0	0	0
NPR1	4881	symbol	H. sapiens	4881	H. sapiens	NPR1	natriuretic peptide receptor 1	GO:0030828 positive regulation of cGMP biosynthetic process;GO:0035815 positive regulation of renal sodium excretion;GO:0030826 regulation of cGMP biosynthetic process	RGC kinase: adenylyl cyclase class-4/guanylyl cyclase	Enzymes/{ENZYME proteins/Lyases,Kinases/RGC receptor guanylate cyclase kinases}	Nucleoli	Nitroprusside (Protein kinase activity);Nitroglycerin (Protein kinase activity);Isosorbide Dinitrate (Protein kinase activity);Amyl Nitrite (Protein kinase activity);Erythrityl Tetranitrate (Protein kinase activity);Nesiritide (Protein kinase activity);Ularitide (Protein kinase activity)			0	0	0	0	0	0	0	0	0	0	1	0	1	0	0	0	0	1	1	1
NRBP2	340371	symbol	H. sapiens	340371	H. sapiens	NRBP2	nuclear receptor binding protein 2	GO:0016242 negative regulation of macroautophagy;GO:0010507 negative regulation of autophagy;GO:0043524 negative regulation of neuron apoptotic process	Other	Enzymes/Kinases	Cytoplasm				0	0	0	0	0	0	0	0	0	0	0	0	0	0	0	0	0	0	0	0
NRDE2	55051	symbol	H. sapiens	55051	H. sapiens	NRDE2	NRDE-2, necessary for RNA interference, domain containing	GO:0031048 chromatin silencing by small RNA;GO:0016246 RNA interference;GO:0006342 chromatin silencing			Nucleus but not nucleoli;Mitochondria				0	0	0	0	0	0	0	0	0	0	0	0	0	0	0	0	0	0	0	0
NRSN2	80023	symbol	H. sapiens	80023	H. sapiens	NRSN2	neurensin 2	GO:0008150 biological_process		Transporters	Vesicles				0	0	0	0	0	0	0	0	0	0	0	0	0	0	0	0	0	0	0	0
NSL1	25936	symbol	H. sapiens	25936	H. sapiens	NSL1	NSL1, MIS12 kinetochore complex component	GO:0007062 sister chromatid cohesion;GO:0000070 mitotic sister chromatid segregation;GO:0000819 sister chromatid segregation			Nucleus but not nucleoli				0	0	0	0	0	0	0	0	0	0	0	0	0	0	0	0	0	0	0	0
NSUN2	54888	symbol	H. sapiens	54888	H. sapiens	NSUN2	NOP2/Sun RNA methyltransferase family member 2	GO:0033313 meiotic cell cycle checkpoint;GO:0030488 tRNA methylation;GO:0007286 spermatid development		Enzymes/ENZYME proteins/Transferases	Nucleus		(M14)PID AURORA B PATHWAY		0	0	0	1	0	0	0	0	0	0	0	0	0	0	0	0	0	0	0	0
NSUN6	221078	symbol	H. sapiens	221078	H. sapiens	NSUN6	NOP2/Sun RNA methyltransferase family member 6	GO:0030488 tRNA methylation;GO:0006400 tRNA modification;GO:0001510 RNA methylation			Golgi apparatus				0	0	0	1	0	0	0	0	0	0	0	0	0	0	0	0	0	0	0	0
NT5DC3	51559	symbol	H. sapiens	51559	H. sapiens	NT5DC3	5'-nucleotidase domain containing 3	GO:0016311 dephosphorylation;GO:0006796 phosphate-containing compound metabolic process;GO:0006793 phosphorus metabolic process							0	0	0	0	0	0	0	0	0	0	0	0	0	0	0	0	0	0	0	0
NT5M	56953	symbol	H. sapiens	56953	H. sapiens	NT5M	5',3'-nucleotidase, mitochondrial	GO:0046079 dUMP catabolic process;GO:0009178 pyrimidine deoxyribonucleoside monophosphate catabolic process;GO:0009131 pyrimidine nucleoside monophosphate catabolic process				Dpb-T (Nucleotide binding);cyclic 3',5'-thymidine monophosphate (Nucleotide binding)			1	0	0	0	0	0	0	1	0	0	1	0	0	0	0	0	0	0	1	0
NUBP2	10101	symbol	H. sapiens	10101	H. sapiens	NUBP2	nucleotide binding protein 2	GO:0016226 iron-sulfur cluster assembly;GO:0031163 metallo-sulfur cluster assembly;GO:0051188 cofactor biosynthetic process			Nucleus;Cytoplasm				0	0	0	0	0	0	0	0	0	0	0	0	0	0	0	0	0	0	0	0
NUDCD3	23386	symbol	H. sapiens	23386	H. sapiens	NUDCD3	NudC domain containing 3	GO:0006457 protein folding;GO:0007275 multicellular organism development;GO:0048856 anatomical structure development			Plasma membrane;Cytoplasm				0	0	0	0	0	0	0	0	0	0	0	0	0	0	0	0	0	0	0	0
NUDT12	83594	symbol	H. sapiens	83594	H. sapiens	NUDT12	nudix hydrolase 12	GO:0019677 NAD catabolic process;GO:0006742 NADP catabolic process;GO:0019364 pyridine nucleotide catabolic process		Enzymes/ENZYME proteins/Hydrolases				(M5948)HALLMARK BILE ACID METABOLISM	1	0	0	0	0	0	0	1	0	0	0	0	0	0	0	0	0	0	1	0
NUDT16	131870	symbol	H. sapiens	131870	H. sapiens	NUDT16	nudix hydrolase 16	GO:1901639 XDP catabolic process;GO:0035863 dITP catabolic process;GO:0046709 IDP catabolic process		Enzymes/ENZYME proteins/Hydrolases	Nucleus;Nucleoli				1	0	0	1	0	0	0	1	0	0	1	0	0	0	0	0	0	0	1	0
NUDT4	11163	symbol	H. sapiens	11163	H. sapiens	NUDT4	nudix hydrolase 4	GO:1901911 adenosine 5'-(hexahydrogen pentaphosphate) catabolic process;GO:1901907 diadenosine pentaphosphate catabolic process;GO:1901909 diadenosine hexaphosphate catabolic process		Enzymes/ENZYME proteins/Hydrolases				(M5945)HALLMARK HEME METABOLISM	1	0	0	0	0	0	0	1	0	0	0	0	0	0	0	0	0	0	1	0
NUFIP1	26747	symbol	H. sapiens	26747	H. sapiens	NUFIP1	NUFIP1, FMR1 interacting protein 1	GO:0000492 box C/D snoRNP assembly;GO:0000491 small nucleolar ribonucleoprotein complex assembly;GO:0022618 ribonucleoprotein complex assembly			Nucleus			(M5924)HALLMARK MTORC1 SIGNALING	0	0	0	1	0	0	0	0	0	0	0	0	0	0	0	0	0	0	0	0
NXPH3	11248	symbol	H. sapiens	11248	H. sapiens	NXPH3	neurexophilin 3	GO:0007218 neuropeptide signaling pathway;GO:0007186 G-protein coupled receptor signaling pathway;GO:0007165 signal transduction							0	0	0	0	0	0	0	0	0	0	0	0	0	0	0	0	0	0	0	0
OAS2	4939	symbol	H. sapiens	4939	H. sapiens	OAS2	2'-5'-oligoadenylate synthetase 2	GO:0018377 protein myristoylation;GO:0060337 type I interferon signaling pathway;GO:0060333 interferon-gamma-mediated signaling pathway		Enzymes/ENZYME proteins/Transferases	Nucleus but not nucleoli;Cytoplasm			(M5913)HALLMARK INTERFERON GAMMA RESPONSE	0	0	0	0	1	0	0	0	0	0	0	0	0	0	0	0	1	0	0	1
OAS3	4940	symbol	H. sapiens	4940	H. sapiens	OAS3	2'-5'-oligoadenylate synthetase 3	GO:0045071 negative regulation of viral genome replication;GO:0060700 regulation of ribonuclease activity;GO:0060337 type I interferon signaling pathway		Enzymes/ENZYME proteins/Transferases	Cytoplasm			(M5913)HALLMARK INTERFERON GAMMA RESPONSE	0	0	0	0	1	0	0	0	0	0	0	0	0	0	0	0	1	0	0	0
OCSTAMP	128506	symbol	H. sapiens	128506	H. sapiens	OCSTAMP	osteoclast stimulatory transmembrane protein	GO:0034241 positive regulation of macrophage fusion;GO:0034239 regulation of macrophage fusion;GO:0072674 multinuclear osteoclast differentiation							0	0	0	0	1	1	0	0	0	0	0	0	0	0	0	0	0	0	0	0
OGDHL	55753	symbol	H. sapiens	55753	H. sapiens	OGDHL	oxoglutarate dehydrogenase-like	GO:0006096 glycolytic process;GO:0006757 ATP generation from ADP;GO:0006099 tricarboxylic acid cycle		Citric acid cycle related proteins	Nucleoli				1	1	0	0	0	0	1	0	0	0	0	1	0	0	0	0	0	0	1	0
OIT3	170392	symbol	H. sapiens	170392	H. sapiens	OIT3	oncoprotein induced transcript 3	GO:1903118 urate homeostasis;GO:0048878 chemical homeostasis;GO:0042592 homeostatic process					(M3008)NABA ECM GLYCOPROTEINS; (M5884)NABA CORE MATRISOME; (M5889)NABA MATRISOME		0	0	0	0	0	0	0	0	0	0	0	0	0	0	0	0	0	0	0	0
OOEP	441161	symbol	H. sapiens	441161	H. sapiens	OOEP	oocyte expressed protein	GO:0007566 embryo implantation;GO:0035088 establishment or maintenance of apical/basal cell polarity;GO:0061245 establishment or maintenance of bipolar cell polarity							0	0	0	0	0	0	0	0	0	0	0	0	0	0	0	0	0	0	0	0
OPA3	80207	symbol	H. sapiens	80207	H. sapiens	OPA3	OPA3, outer mitochondrial membrane lipid metabolism regulator	GO:0070584 mitochondrion morphogenesis;GO:0007601 visual perception;GO:0050905 neuromuscular process			Cytoplasm				0	0	0	0	0	0	0	0	0	0	0	0	0	0	0	0	0	0	0	0
ORAI2	80228	symbol	H. sapiens	80228	H. sapiens	ORAI2	ORAI calcium release-activated calcium modulator 2	GO:0002115 store-operated calcium entry;GO:0070588 calcium ion transmembrane transport;GO:0006816 calcium ion transport			Nucleus				0	0	0	0	0	0	0	0	0	0	0	0	0	0	0	0	0	0	0	0
ORM1	5004	symbol	H. sapiens	5004	H. sapiens	ORM1	orosomucoid 1	GO:0032720 negative regulation of tumor necrosis factor production;GO:0002576 platelet degranulation;GO:0032715 negative regulation of interleukin-6 production				Chlorpromazine;Oxycodone;Thalidomide		(M5905)HALLMARK ADIPOGENESIS	0	0	0	0	0	0	0	0	1	1	0	0	0	1	0	1	0	0	0	0
OS9	10956	symbol	H. sapiens	10956	H. sapiens	OS9	OS9, endoplasmic reticulum lectin	GO:1904153 negative regulation of retrograde protein transport, ER to cytosol;GO:1904380 endoplasmic reticulum mannose trimming;GO:0070862 negative regulation of protein exit from endoplasmic reticulum		Transporters/Accessory Factors Involved in Transport			(M180)PID HIF1A PATHWAY		1	0	0	0	0	0	0	0	0	0	0	0	0	0	1	0	0	0	0	0
OTULIN	90268	symbol	H. sapiens	90268	H. sapiens	OTULIN	OTU deubiquitinase with linear linkage specificity	GO:0070431 nucleotide-binding oligomerization domain containing 2 signaling pathway;GO:0070423 nucleotide-binding oligomerization domain containing signaling pathway;GO:1990108 protein linear deubiquitination		Enzymes/{ENZYME proteins/Hydrolases,Peptidases/Cysteine-type peptidases}	Mitochondria				0	0	0	0	1	0	0	0	0	1	0	0	0	0	0	0	1	0	0	0
OVCA2	124641	symbol	H. sapiens	124641	H. sapiens	OVCA2	ovarian tumor suppressor candidate 2	GO:0032526 response to retinoic acid;GO:0001101 response to acid chemical;GO:0033993 response to lipid							0	0	0	0	0	0	0	0	0	0	0	0	0	0	0	0	0	0	0	0
OVOL1	5017	symbol	H. sapiens	5017	H. sapiens	OVOL1	ovo like transcriptional repressor 1	GO:1901994 negative regulation of meiotic cell cycle phase transition;GO:0051729 germline cell cycle switching, mitotic to meiotic cell cycle;GO:1901993 regulation of meiotic cell cycle phase transition		Transcription factors/Zinc-coordinating DNA-binding domains	Nucleus				0	0	0	0	0	0	0	0	0	0	0	0	0	0	0	0	0	0	0	0
OXNAD1	92106	symbol	H. sapiens	92106	H. sapiens	OXNAD1	oxidoreductase NAD binding domain containing 1	GO:0055114 oxidation-reduction process;GO:0044710 single-organism metabolic process;GO:0008152 metabolic process			Nucleus				0	0	0	0	0	0	0	0	0	0	0	1	0	0	0	0	0	0	0	0
OXSM	54995	symbol	H. sapiens	54995	H. sapiens	OXSM	3-oxoacyl-ACP synthase, mitochondrial	GO:0051792 medium-chain fatty acid biosynthetic process;GO:0051790 short-chain fatty acid biosynthetic process;GO:0051791 medium-chain fatty acid metabolic process		Enzymes/ENZYME proteins/Transferases	Cytoplasm;Mitochondria				0	1	0	0	0	0	0	0	0	0	0	0	0	0	0	0	0	0	0	0
P2RY11	5032	symbol	H. sapiens	5032	H. sapiens	P2RY11	purinergic receptor P2Y11	GO:0007190 activation of adenylate cyclase activity;GO:0045762 positive regulation of adenylate cyclase activity;GO:0045761 regulation of adenylate cyclase activity		G-protein coupled receptors/{Adenosine and adenine nucleotide receptors,GPCRs excl olfactory receptors}					0	0	0	0	0	0	0	0	0	0	0	0	0	0	0	0	0	0	1	1
P3H4	10609	symbol	H. sapiens	10609	H. sapiens	P3H4	prolyl 3-hydroxylase family member 4 (non-enzymatic)	GO:0007130 synaptonemal complex assembly;GO:0007129 synapsis;GO:0045143 homologous chromosome segregation							0	0	0	0	0	0	0	0	0	0	0	0	0	0	0	0	0	0	0	0
PADI2	11240	symbol	H. sapiens	11240	H. sapiens	PADI2	peptidyl arginine deiminase 2	GO:0036413 histone H3-R26 citrullination;GO:0036414 histone citrullination;GO:1901624 negative regulation of lymphocyte chemotaxis		Enzymes/ENZYME proteins/Hydrolases		L-Citrulline (Protein-arginine deiminase activity)			0	1	0	0	1	0	0	0	1	1	0	0	0	0	0	0	0	0	0	0
PADI3	51702	symbol	H. sapiens	51702	H. sapiens	PADI3	peptidyl arginine deiminase 3	GO:0036414 histone citrullination;GO:0018101 protein citrullination;GO:0019240 citrulline biosynthetic process		Enzymes/ENZYME proteins/Hydrolases	Vesicles	L-Citrulline (Protein-arginine deiminase activity)			0	1	0	0	0	0	0	0	0	0	0	0	0	0	0	0	0	0	0	0
PADI4	23569	symbol	H. sapiens	23569	H. sapiens	PADI4	peptidyl arginine deiminase 4	GO:0036413 histone H3-R26 citrullination;GO:0036414 histone citrullination;GO:0018101 protein citrullination		Enzymes/ENZYME proteins/Hydrolases		L-Citrulline (Protein-arginine deiminase activity);Azithromycin (Protein-arginine deiminase activity);Doxycycline (Protein-arginine deiminase activity);Tetracycline (Protein-arginine deiminase activity);Streptomycin (Protein-arginine deiminase activity);N-[(1S)-1-(AMINOCARBONYL)-4-(ETHANIMIDOYLAMINO)BUTYL]BENZAMIDE (Protein-arginine deiminase activity)			0	1	0	0	0	0	0	0	0	0	0	0	0	0	0	0	1	0	0	0
PAIP2B	400961	symbol	H. sapiens	400961	H. sapiens	PAIP2B	poly(A) binding protein interacting protein 2B	GO:0045947 negative regulation of translational initiation;GO:0006446 regulation of translational initiation;GO:0017148 negative regulation of translation			Nucleoli				0	0	0	0	0	0	0	0	0	0	0	0	0	0	0	0	0	0	0	0
PAK2	5062	symbol	H. sapiens	5062	H. sapiens	PAK2	p21 (RAC1) activated kinase 2	GO:2001271 negative regulation of cysteine-type endopeptidase activity involved in execution phase of apoptosis;GO:0031295 T cell costimulation;GO:2001270 regulation of cysteine-type endopeptidase activity involved in execution phase of apoptosis	STE Ser/Thr protein kinase family	Enzymes/{ENZYME proteins/Transferases,Kinases/STE Ser/Thr protein kinases};RAS pathway related proteins	Nucleus		(M139)PID MYC PATHWAY; (M76)PID P38 ALPHA BETA PATHWAY; (M16801)SIG REGULATION OF THE ACTIN CYTOSKELETON BY RHO GTPASES		0	0	0	0	0	1	0	0	0	1	0	0	0	0	0	0	1	0	0	0
PANK3	79646	symbol	H. sapiens	79646	H. sapiens	PANK3	pantothenate kinase 3	GO:0015937 coenzyme A biosynthetic process;GO:0034030 ribonucleoside bisphosphate biosynthetic process;GO:0034033 purine nucleoside bisphosphate biosynthetic process		Enzymes/ENZYME proteins/Transferases	Nucleus but not nucleoli				0	0	0	0	0	0	0	0	0	0	0	0	0	0	0	0	0	0	1	1
PAQR8	85315	symbol	H. sapiens	85315	H. sapiens	PAQR8	progestin and adipoQ receptor family member 8	GO:0043401 steroid hormone mediated signaling pathway;GO:0048477 oogenesis;GO:0007292 female gamete generation			Plasma membrane				0	0	0	0	0	0	0	0	0	0	0	0	0	0	0	0	0	0	0	0
PARD6G	84552	symbol	H. sapiens	84552	H. sapiens	PARD6G	par-6 family cell polarity regulator gamma	GO:0070830 bicellular tight junction assembly;GO:0043297 apical junction assembly;GO:0007043 cell-cell junction assembly			Plasma membrane			(M5915)HALLMARK APICAL JUNCTION	0	0	0	0	0	0	0	0	0	0	0	0	0	0	0	0	0	0	0	0
PARVB	29780	symbol	H. sapiens	29780	H. sapiens	PARVB	parvin beta	GO:0071963 establishment or maintenance of cell polarity regulating cell shape;GO:0030032 lamellipodium assembly;GO:0031532 actin cytoskeleton reorganization					(M71)PID ILK PATHWAY		0	0	0	0	0	0	0	0	0	0	0	0	0	0	0	0	0	0	0	0
PCSK7	9159	symbol	H. sapiens	9159	H. sapiens	PCSK7	proprotein convertase subtilisin/kexin type 7	GO:0016486 peptide hormone processing;GO:0042445 hormone metabolic process;GO:0016485 protein processing		Enzymes/Peptidases/Serine-type peptidases	Nucleus;Nucleoli;Nuclear membrane				0	0	0	0	0	0	0	0	0	0	0	0	0	0	0	0	0	0	0	0
PCYOX1	51449	symbol	H. sapiens	51449	H. sapiens	PCYOX1	prenylcysteine oxidase 1	GO:0030328 prenylcysteine catabolic process;GO:0030329 prenylcysteine metabolic process;GO:0030327 prenylated protein catabolic process		Enzymes/ENZYME proteins/Oxidoreductases					1	1	0	0	0	0	0	1	0	0	0	1	0	0	0	0	0	0	0	0
PCYOX1L	78991	symbol	H. sapiens	78991	H. sapiens	PCYOX1L	prenylcysteine oxidase 1 like	GO:0030328 prenylcysteine catabolic process;GO:0030329 prenylcysteine metabolic process;GO:0030327 prenylated protein catabolic process			Nucleus but not nucleoli;Mitochondria				1	1	0	0	0	0	0	1	0	0	0	1	0	0	0	0	0	0	0	0
PDCD1	5133	symbol	H. sapiens	5133	H. sapiens	PDCD1	programmed cell death 1	GO:0031295 T cell costimulation;GO:0002644 negative regulation of tolerance induction;GO:0070234 positive regulation of T cell apoptotic process		CD markers		CT-011 (Signal transducer activity);Nivolumab (Signal transducer activity);Pembrolizumab (Signal transducer activity)		(M5956)HALLMARK KRAS SIGNALING DN	0	0	0	0	0	1	0	0	0	0	0	0	0	0	0	0	0	0	0	0
PDCD11	22984	symbol	H. sapiens	22984	H. sapiens	PDCD11	programmed cell death 11	GO:0006364 rRNA processing;GO:0016072 rRNA metabolic process;GO:0034470 ncRNA processing			Nucleoli				0	0	0	1	0	0	0	0	0	0	0	0	0	0	0	0	0	0	0	0
PDE5A	8654	symbol	H. sapiens	8654	H. sapiens	PDE5A	phosphodiesterase 5A	GO:0060282 positive regulation of oocyte development;GO:0046069 cGMP catabolic process;GO:0055118 negative regulation of cardiac muscle contraction		Enzymes/ENZYME proteins/Hydrolases	Cytoplasm	Sildenafil (Metal ion binding);Theophylline (Metal ion binding);Pentoxifylline (Metal ion binding);Tadalafil (Metal ion binding);Vardenafil (Metal ion binding);Dipyridamole (Metal ion binding);Guanosine-5'-Monophosphate (Metal ion binding);Gamma-Glutamyl[S-(2-Iodobenzyl)Cysteinyl]Glycine (Metal ion binding);Citric Acid (Metal ion binding);OSI-461 (Metal ion binding);Avanafil (Metal ion binding);U…			1	0	0	0	0	1	0	1	0	0	1	0	0	0	0	0	0	0	1	0
PDE6A	5145	symbol	H. sapiens	5145	H. sapiens	PDE6A	phosphodiesterase 6A	GO:0022400 regulation of rhodopsin mediated signaling pathway;GO:0016056 rhodopsin mediated signaling pathway;GO:0046037 GMP metabolic process		Enzymes/ENZYME proteins/Hydrolases			(M16518)ST WNT CA2 CYCLIC GMP PATHWAY; (M204)PID RHODOPSIN PATHWAY		0	0	0	0	0	0	0	0	0	1	1	0	0	0	0	0	0	1	1	0
PDE6B	5158	symbol	H. sapiens	5158	H. sapiens	PDE6B	phosphodiesterase 6B	GO:0022400 regulation of rhodopsin mediated signaling pathway;GO:0016056 rhodopsin mediated signaling pathway;GO:0046037 GMP metabolic process		Enzymes/ENZYME proteins/Hydrolases	Cytoplasm		(M16518)ST WNT CA2 CYCLIC GMP PATHWAY; (M204)PID RHODOPSIN PATHWAY	(M5956)HALLMARK KRAS SIGNALING DN	0	0	0	0	0	0	0	0	0	1	1	0	0	0	0	0	0	1	1	0
PDHA1	5160	symbol	H. sapiens	5160	H. sapiens	PDHA1	pyruvate dehydrogenase (lipoamide) alpha 1	GO:0061732 mitochondrial acetyl-CoA biosynthetic process from pyruvate;GO:0010510 regulation of acetyl-CoA biosynthetic process from pyruvate;GO:0050812 regulation of acyl-CoA biosynthetic process		Citric acid cycle related proteins;Enzymes/ENZYME proteins/Oxidoreductases		NADH (Pyruvate dehydrogenase activity)		(M5935)HALLMARK FATTY ACID METABOLISM; (M5936)HALLMARK OXIDATIVE PHOSPHORYLATION	0	1	0	0	0	0	1	0	0	0	0	1	0	0	0	0	0	0	1	0
PDXP	57026	symbol	H. sapiens	57026	H. sapiens	PDXP	pyridoxal phosphatase	GO:0030836 positive regulation of actin filament depolymerization;GO:0031247 actin rod assembly;GO:0032361 pyridoxal phosphate catabolic process		Enzymes/ENZYME proteins/Hydrolases		Pyridoxal Phosphate (Pyridoxal phosphatase activity)			1	0	0	0	0	0	0	1	0	0	0	0	0	0	0	0	0	0	0	0
PEX10	5192	symbol	H. sapiens	5192	H. sapiens	PEX10	peroxisomal biogenesis factor 10	GO:0016558 protein import into peroxisome matrix;GO:0006625 protein targeting to peroxisome;GO:0072663 establishment of protein localization to peroxisome		Transporters/Primary Active Transporters	Nucleus but not nucleoli				0	0	0	0	0	0	0	0	0	0	0	0	0	0	0	0	0	0	0	0
PEX14	5195	symbol	H. sapiens	5195	H. sapiens	PEX14	peroxisomal biogenesis factor 14	GO:0044721 protein import into peroxisome matrix, substrate release;GO:1901094 negative regulation of protein homotetramerization;GO:0016561 protein import into peroxisome matrix, translocation		Transporters/Primary Active Transporters	Vesicles			(M5949)HALLMARK PEROXISOME; (M5942)HALLMARK UV RESPONSE DN; (M5905)HALLMARK ADIPOGENESIS	0	0	0	0	0	0	0	0	0	0	0	0	0	0	0	0	0	0	0	0
PEX26	55670	symbol	H. sapiens	55670	H. sapiens	PEX26	peroxisomal biogenesis factor 26	GO:0045046 protein import into peroxisome membrane;GO:0016558 protein import into peroxisome matrix;GO:0015919 peroxisomal membrane transport		Transporters/Primary Active Transporters				(M5948)HALLMARK BILE ACID METABOLISM	0	0	0	0	0	0	0	0	0	0	0	0	0	0	0	0	0	0	0	0
PFAS	5198	symbol	H. sapiens	5198	H. sapiens	PFAS	phosphoribosylformylglycinamidine synthase	GO:0006189 'de novo' IMP biosynthetic process;GO:0006188 IMP biosynthetic process;GO:0046040 IMP metabolic process		Enzymes/ENZYME proteins/Ligase	Nucleus but not nucleoli	L-Glutamic Acid (Phosphoribosylformylglycinamidine synthase activity)			0	1	0	0	0	0	0	0	0	0	1	0	0	0	0	0	0	0	1	1
PFDN1	5201	symbol	H. sapiens	5201	H. sapiens	PFDN1	prefoldin subunit 1	GO:0006457 protein folding;GO:0007049 cell cycle;GO:0006355 regulation of transcription, DNA-templated			Plasma membrane;Cytoplasm				0	0	0	0	0	0	0	0	0	0	0	0	0	0	0	0	0	0	0	0
PFN4	375189	symbol	H. sapiens	375189	H. sapiens	PFN4	profilin family member 4	GO:0042989 sequestering of actin monomers;GO:0030837 negative regulation of actin filament polymerization;GO:0032272 negative regulation of protein polymerization							0	0	0	0	0	0	0	0	0	0	0	0	0	0	0	0	0	0	0	0
PGAP3	93210	symbol	H. sapiens	93210	H. sapiens	PGAP3	post-GPI attachment to proteins 3	GO:0006506 GPI anchor biosynthetic process;GO:0006505 GPI anchor metabolic process;GO:0006661 phosphatidylinositol biosynthetic process			Plasma membrane;Cytoplasm				0	1	0	0	0	0	0	0	0	0	0	0	0	0	0	0	0	0	1	1
PGD	5226	symbol	H. sapiens	5226	H. sapiens	PGD	phosphogluconate dehydrogenase	GO:0009051 pentose-phosphate shunt, oxidative branch;GO:0019521 D-gluconate metabolic process;GO:0019322 pentose biosynthetic process		Enzymes/ENZYME proteins/Oxidoreductases	Cytoplasm;Cytoskeleton (Intermediate filaments)	Gadopentetate dimeglumine (Phosphogluconate dehydrogenase (decarboxylating) activity);Dacarbazine (Phosphogluconate dehydrogenase (decarboxylating) activity);Ketotifen (Phosphogluconate dehydrogenase (decarboxylating) activity);6-Phosphogluconic Acid (Phosphogluconate dehydrogenase (decarboxylating) activity);Nicotinamide 8-Bromo-Adenine Dinucleotide Phosphate (Phosphogluconate dehydrogenase (dec…		(M5934)HALLMARK XENOBIOTIC METABOLISM	0	1	0	0	0	0	1	0	0	0	0	1	0	0	0	0	0	0	1	0
PGLYRP1	8993	symbol	H. sapiens	8993	H. sapiens	PGLYRP1	peptidoglycan recognition protein 1	GO:0032827 negative regulation of natural killer cell differentiation involved in immune response;GO:0032824 negative regulation of natural killer cell differentiation;GO:0032826 regulation of natural killer cell differentiation involved in immune response						(M5944)HALLMARK ANGIOGENESIS	0	0	0	0	0	1	0	1	1	1	0	0	0	0	0	1	1	0	0	0
PGM2	55276	symbol	H. sapiens	55276	H. sapiens	PGM2	phosphoglucomutase 2	GO:0019388 galactose catabolic process;GO:0006098 pentose-phosphate shunt;GO:0005980 glycogen catabolic process		Enzymes/ENZYME proteins/Isomerase	Cytoskeleton (Intermediate filaments)			(M5891)HALLMARK HYPOXIA; (M5937)HALLMARK GLYCOLYSIS	1	0	0	0	0	0	1	1	1	0	1	1	0	0	0	0	0	0	1	0
PGPEP1	54858	symbol	H. sapiens	54858	H. sapiens	PGPEP1	pyroglutamyl-peptidase I	GO:0006508 proteolysis;GO:0019538 protein metabolic process;GO:0043170 macromolecule metabolic process		Enzymes/{ENZYME proteins/Hydrolases,Peptidases/Cysteine-type peptidases}					0	0	0	0	0	0	0	0	0	0	0	0	0	0	0	0	0	0	0	0
PHF5A	84844	symbol	H. sapiens	84844	H. sapiens	PHF5A	PHD finger protein 5A	GO:0000398 mRNA splicing, via spliceosome;GO:0000377 RNA splicing, via transesterification reactions with bulged adenosine as nucleophile;GO:0000375 RNA splicing, via transesterification reactions		Transcription factors/Yet undefined DNA-binding domains	Nucleus but not nucleoli			(M5925)HALLMARK E2F TARGETS	0	0	0	0	0	0	0	0	0	0	0	0	0	0	0	0	0	0	0	0
PHKB	5257	symbol	H. sapiens	5257	H. sapiens	PHKB	phosphorylase kinase regulatory subunit beta	GO:0005980 glycogen catabolic process;GO:0009251 glucan catabolic process;GO:0044247 cellular polysaccharide catabolic process							1	0	0	0	0	0	1	0	0	0	0	1	0	0	0	0	0	0	0	0
PHYH	5264	symbol	H. sapiens	5264	H. sapiens	PHYH	phytanoyl-CoA 2-hydroxylase	GO:0097089 methyl-branched fatty acid metabolic process;GO:0001561 fatty acid alpha-oxidation;GO:0009062 fatty acid catabolic process		Enzymes/ENZYME proteins/Oxidoreductases		Antihemophilic Factor (Recombinant) (Phytanoyl-coa dioxygenase activity);Vitamin C (Phytanoyl-coa dioxygenase activity)		(M5948)HALLMARK BILE ACID METABOLISM; (M5905)HALLMARK ADIPOGENESIS; (M5936)HALLMARK OXIDATIVE PHOSPHORYLATION	1	1	0	0	0	0	0	0	0	0	0	1	0	0	0	0	0	0	0	0
PHYHIP	9796	symbol	H. sapiens	9796	H. sapiens	PHYHIP	phytanoyl-CoA 2-hydroxylase interacting protein								0	0	0	0	0	0	0	0	0	0	0	0	0	0	0	0	0	0	0	0
PIGM	93183	symbol	H. sapiens	93183	H. sapiens	PIGM	phosphatidylinositol glycan anchor biosynthesis class M	GO:0016254 preassembly of GPI anchor in ER membrane;GO:0006506 GPI anchor biosynthetic process;GO:0006505 GPI anchor metabolic process							0	1	0	0	0	0	0	0	0	0	0	0	0	0	0	0	0	0	1	1
PIGT	51604	symbol	H. sapiens	51604	H. sapiens	PIGT	phosphatidylinositol glycan anchor biosynthesis class T	GO:0016255 attachment of GPI anchor to protein;GO:0006506 GPI anchor biosynthetic process;GO:0006505 GPI anchor metabolic process							0	1	0	0	0	0	0	0	0	0	0	0	0	0	0	0	0	0	1	1
PIK3R2	5296	symbol	H. sapiens	5296	H. sapiens	PIK3R2	phosphoinositide-3-kinase regulatory subunit 2	GO:2001275 positive regulation of glucose import in response to insulin stimulus;GO:2001273 regulation of glucose import in response to insulin stimulus;GO:0042993 positive regulation of transcription factor import into nucleus		RAS pathway related proteins		Isoprenaline (Receptor tyrosine kinase binding);SF1126 (Receptor tyrosine kinase binding)	(M79)PID TRAIL PATHWAY; (M193)PID NEPHRIN NEPH1 PATHWAY; (M127)PID ERBB1 RECEPTOR PROXIMAL PATHWAY		0	1	0	0	0	0	0	0	0	0	1	0	0	0	0	0	1	1	1	0
PINK1	65018	symbol	H. sapiens	65018	H. sapiens	PINK1	PTEN induced putative kinase 1	GO:1902958 positive regulation of mitochondrial electron transport, NADH to ubiquinone;GO:1903384 negative regulation of hydrogen peroxide-induced neuron intrinsic apoptotic signaling pathway;GO:1905448 positive regulation of mitochondrial ATP synthesis coupled electron transport	Other	Enzymes/{ENZYME proteins/Transferases,Kinases}				(M5934)HALLMARK XENOBIOTIC METABOLISM	0	0	0	0	0	0	0	0	0	0	0	1	0	0	0	0	0	1	1	1
PIP4K2C	79837	symbol	H. sapiens	79837	H. sapiens	PIP4K2C	phosphatidylinositol-5-phosphate 4-kinase type 2 gamma	GO:2000786 positive regulation of autophagosome assembly;GO:0044090 positive regulation of vacuole organization;GO:2000785 regulation of autophagosome assembly		Enzymes/ENZYME proteins/Transferases	Vesicles				0	1	0	0	0	0	0	0	0	0	0	0	0	0	0	0	0	0	1	0
PLA2G15	23659	symbol	H. sapiens	23659	H. sapiens	PLA2G15	phospholipase A2 group XV	GO:0046338 phosphatidylethanolamine catabolic process;GO:0034638 phosphatidylcholine catabolic process;GO:0046475 glycerophospholipid catabolic process			Nucleus but not nucleoli;Vesicles				1	1	1	0	0	0	0	1	0	0	0	0	0	0	0	0	0	0	0	0
PLA2G3	50487	symbol	H. sapiens	50487	H. sapiens	PLA2G3	phospholipase A2 group III	GO:0050482 arachidonic acid secretion;GO:0001675 acrosome assembly;GO:0007288 sperm axoneme assembly		Enzymes/ENZYME proteins/Hydrolases;RAS pathway related proteins					1	1	0	0	0	1	0	0	0	0	0	0	0	0	0	0	1	0	0	0
PLA2G4B	100137049	symbol	H. sapiens	100137049	H. sapiens	PLA2G4B	phospholipase A2 group IVB	GO:0036150 phosphatidylserine acyl-chain remodeling;GO:0036148 phosphatidylglycerol acyl-chain remodeling;GO:0036152 phosphatidylethanolamine acyl-chain remodeling		Enzymes/ENZYME proteins/Hydrolases					1	1	0	0	0	0	0	0	0	1	0	0	0	0	0	0	0	0	1	0
PLAC1	10761	symbol	H. sapiens	10761	H. sapiens	PLAC1	placenta specific 1	GO:0090214 spongiotrophoblast layer developmental growth;GO:0060712 spongiotrophoblast layer development;GO:0001892 embryonic placenta development						(M5907)HALLMARK ESTROGEN RESPONSE LATE	0	0	0	0	0	0	0	0	0	0	0	0	0	0	0	0	0	0	0	0
PLCD3	113026	symbol	H. sapiens	113026	H. sapiens	PLCD3	phospholipase C delta 3	GO:0060716 labyrinthine layer blood vessel development;GO:0060674 placenta blood vessel development;GO:0060711 labyrinthine layer development		Enzymes/ENZYME proteins/Hydrolases	Plasma membrane				1	0	0	0	0	0	0	0	0	0	0	0	0	0	0	0	0	0	0	0
PLCG1	5335	symbol	H. sapiens	5335	H. sapiens	PLCG1	phospholipase C gamma 1	GO:0051281 positive regulation of release of sequestered calcium ion into cytosol;GO:0051279 regulation of release of sequestered calcium ion into cytosol;GO:0051209 release of sequestered calcium ion into cytosol		Enzymes/ENZYME proteins/Hydrolases;RAS pathway related proteins	Cytoplasm		(M64)PID S1P S1P4 PATHWAY; (M184)PID ECADHERIN KERATINOCYTE PATHWAY; (M103)PID S1P S1P1 PATHWAY	(M5923)HALLMARK PI3K AKT MTOR SIGNALING; (M5915)HALLMARK APICAL JUNCTION	1	0	0	0	0	0	0	0	0	0	1	0	0	0	0	0	1	1	0	0
PLEK	5341	symbol	H. sapiens	5341	H. sapiens	PLEK	pleckstrin	GO:0010920 negative regulation of inositol phosphate biosynthetic process;GO:0010925 positive regulation of inositol-polyphosphate 5-phosphatase activity;GO:0070560 protein secretion by platelet						(M5946)HALLMARK COAGULATION; (M5921)HALLMARK COMPLEMENT; (M5890)HALLMARK TNFA SIGNALING VIA NFKB	0	1	0	0	0	1	1	0	0	1	0	0	1	0	0	0	0	0	1	0
PLEKHA2	59339	symbol	H. sapiens	59339	H. sapiens	PLEKHA2	pleckstrin homology domain containing A2	GO:0001954 positive regulation of cell-matrix adhesion;GO:0001952 regulation of cell-matrix adhesion;GO:0010811 positive regulation of cell-substrate adhesion					(M141)PID PI3KCI PATHWAY		0	0	0	0	0	1	0	0	0	0	0	0	0	0	0	0	0	0	0	0
PLEKHD1	400224	symbol	H. sapiens	400224	H. sapiens	PLEKHD1	pleckstrin homology and coiled-coil domain containing D1								0	0	0	0	0	0	0	0	0	0	0	0	0	0	0	0	0	0	0	0
PLEKHF1	79156	symbol	H. sapiens	79156	H. sapiens	PLEKHF1	pleckstrin homology and FYVE domain containing 1	GO:2001244 positive regulation of intrinsic apoptotic signaling pathway;GO:2001242 regulation of intrinsic apoptotic signaling pathway;GO:2001235 positive regulation of apoptotic signaling pathway							0	0	0	0	0	0	0	0	0	0	0	0	0	0	0	0	0	0	0	0
PLEKHO2	80301	symbol	H. sapiens	80301	H. sapiens	PLEKHO2	pleckstrin homology domain containing O2				Plasma membrane;Cytoplasm				0	0	0	0	1	0	0	0	1	0	0	0	0	0	0	0	0	0	0	0
PLN	5350	symbol	H. sapiens	5350	H. sapiens	PLN	phospholamban	GO:0010881 regulation of cardiac muscle contraction by regulation of the release of sequestered calcium ion;GO:0010880 regulation of release of sequestered calcium ion into cytosol by sarcoplasmic reticulum;GO:0060314 regulation of ryanodine-sensitive calcium-release channel activity		Transporters/Transporter channels and pores	Nucleus but not nucleoli		(M2701)ST MYOCYTE AD PATHWAY		0	0	0	0	0	0	0	0	0	0	0	0	0	0	1	0	0	1	0	0
PLSCR1	5359	symbol	H. sapiens	5359	H. sapiens	PLSCR1	phospholipid scramblase 1	GO:0060368 regulation of Fc receptor mediated stimulatory signaling pathway;GO:2000373 positive regulation of DNA topoisomerase (ATP-hydrolyzing) activity;GO:2000371 regulation of DNA topoisomerase (ATP-hydrolyzing) activity		Transporters				(M5892)HALLMARK CHOLESTEROL HOMEOSTASIS; (M5911)HALLMARK INTERFERON ALPHA RESPONSE; (M5921)HALLMARK COMPLEMENT	0	1	0	0	1	1	0	0	0	1	0	0	1	1	0	0	1	0	1	0
PMAIP1	5366	symbol	H. sapiens	5366	H. sapiens	PMAIP1	phorbol-12-myristate-13-acetate-induced protein 1	GO:1900740 positive regulation of protein insertion into mitochondrial membrane involved in apoptotic signaling pathway;GO:1900739 regulation of protein insertion into mitochondrial membrane involved in apoptotic signaling pathway;GO:1901030 positive regulation of mitochondrial outer membrane permeabilization involved in apoptotic signaling pathway			Vesicles		(M256)PID TAP63 PATHWAY; (M66)PID MYC ACTIV PATHWAY; (M145)PID P53 DOWNSTREAM PATHWAY	(M5902)HALLMARK APOPTOSIS; (M5906)HALLMARK ESTROGEN RESPONSE EARLY	0	0	0	0	0	0	1	0	0	0	0	0	0	0	0	0	1	0	0	0
PNMA1	9240	symbol	H. sapiens	9240	H. sapiens	PNMA1	paraneoplastic Ma antigen 1	GO:0002437 inflammatory response to antigenic stimulus;GO:0043065 positive regulation of apoptotic process;GO:0043068 positive regulation of programmed cell death			Cytoplasm				0	0	0	0	0	0	0	0	0	1	0	0	0	0	0	0	0	0	0	0
PNPO	55163	symbol	H. sapiens	55163	H. sapiens	PNPO	pyridoxamine 5'-phosphate oxidase	GO:0008615 pyridoxine biosynthetic process;GO:0008614 pyridoxine metabolic process;GO:0042819 vitamin B6 biosynthetic process		Enzymes/ENZYME proteins/Oxidoreductases	Nucleus but not nucleoli	Pyridoxal Phosphate (Pyridoxamine-phosphate oxidase activity);Riboflavin Monophosphate (Pyridoxamine-phosphate oxidase activity);Beta-Mercaptoethanol (Pyridoxamine-phosphate oxidase activity)			0	1	0	0	0	0	0	0	0	0	0	1	0	0	0	0	0	0	1	0
PODXL	5420	symbol	H. sapiens	5420	H. sapiens	PODXL	podocalyxin like	GO:0072015 glomerular visceral epithelial cell development;GO:0072310 glomerular epithelial cell development;GO:0072112 glomerular visceral epithelial cell differentiation			Plasma membrane;Vesicles			(M5906)HALLMARK ESTROGEN RESPONSE EARLY	0	0	0	0	0	1	0	0	0	0	0	0	0	0	0	0	0	0	0	0
POLD4	57804	symbol	H. sapiens	57804	H. sapiens	POLD4	DNA polymerase delta 4, accessory subunit	GO:0006296 nucleotide-excision repair, DNA incision, 5'-to lesion;GO:0006297 nucleotide-excision repair, DNA gap filling;GO:0033683 nucleotide-excision repair, DNA incision						(M5898)HALLMARK DNA REPAIR	0	0	0	0	0	0	0	0	0	0	1	0	0	0	0	0	0	0	0	0
POLDIP3	84271	symbol	H. sapiens	84271	H. sapiens	POLDIP3	DNA polymerase delta interacting protein 3	GO:0016973 poly(A)+ mRNA export from nucleus;GO:0006406 mRNA export from nucleus;GO:0071427 mRNA-containing ribonucleoprotein complex export from nucleus			Nucleus but not nucleoli		(M121)PID MTOR 4PATHWAY		0	0	0	0	0	0	0	0	0	0	0	0	0	0	0	0	0	0	0	0
POLE	5426	symbol	H. sapiens	5426	H. sapiens	POLE	DNA polymerase epsilon, catalytic subunit	GO:0045004 DNA replication proofreading;GO:0006287 base-excision repair, gap-filling;GO:0006272 leading strand elongation		Enzymes/ENZYME proteins/Transferases	Nucleus	Cladribine (Zinc ion binding)		(M5901)HALLMARK G2M CHECKPOINT; (M5925)HALLMARK E2F TARGETS	0	0	0	0	0	0	0	0	0	0	1	0	0	0	0	0	0	0	0	0
POLL	27343	symbol	H. sapiens	27343	H. sapiens	POLL	DNA polymerase lambda	GO:0006287 base-excision repair, gap-filling;GO:0016446 somatic hypermutation of immunoglobulin genes;GO:0002566 somatic diversification of immune receptors via somatic mutation		Enzymes/ENZYME proteins/Transferases			(M42)PID DNA PK PATHWAY	(M5898)HALLMARK DNA REPAIR	0	0	0	0	0	0	0	0	0	0	0	0	0	0	0	0	0	0	0	0
POLR1A	25885	symbol	H. sapiens	25885	H. sapiens	POLR1A	RNA polymerase I subunit A	GO:1904750 negative regulation of protein localization to nucleolus;GO:1904749 regulation of protein localization to nucleolus;GO:1902570 protein localization to nucleolus		Enzymes/ENZYME proteins/Transferases;RNA polymerase related proteins	Nucleoli				0	0	0	0	0	0	0	0	0	0	1	0	0	0	0	0	0	0	0	0
POLR1B	84172	symbol	H. sapiens	84172	H. sapiens	POLR1B	RNA polymerase I subunit B	GO:0017126 nucleologenesis;GO:0006363 termination of RNA polymerase I transcription;GO:0006362 transcription elongation from RNA polymerase I promoter		Enzymes/ENZYME proteins/Transferases;RNA polymerase related proteins	Nucleoli				0	0	0	1	0	0	0	0	0	0	1	0	0	0	0	0	0	0	0	0
POLR2C	5432	symbol	H. sapiens	5432	H. sapiens	POLR2C	RNA polymerase II subunit C	GO:0050434 positive regulation of viral transcription;GO:0046782 regulation of viral transcription;GO:0006370 7-methylguanosine mRNA capping		RNA polymerase related proteins	Nucleus but not nucleoli			(M5898)HALLMARK DNA REPAIR	0	0	0	1	0	0	0	0	0	0	1	0	0	0	0	0	0	0	0	0
POLR2L	5441	symbol	H. sapiens	5441	H. sapiens	POLR2L	RNA polymerase II subunit L	GO:0050434 positive regulation of viral transcription;GO:0046782 regulation of viral transcription;GO:0006370 7-methylguanosine mRNA capping		RNA polymerase related proteins					0	0	0	1	0	0	0	0	0	0	1	0	0	0	0	1	0	0	0	0
POLR3A	11128	symbol	H. sapiens	11128	H. sapiens	POLR3A	RNA polymerase III subunit A	GO:0032728 positive regulation of interferon-beta production;GO:1903955 positive regulation of protein targeting to mitochondrion;GO:1903146 regulation of mitophagy		Enzymes/ENZYME proteins/Transferases;RNA polymerase related proteins	Nucleus but not nucleoli				0	0	0	0	0	0	0	0	0	0	1	0	0	0	0	1	1	0	0	0
POLR3B	55703	symbol	H. sapiens	55703	H. sapiens	POLR3B	RNA polymerase III subunit B	GO:0032728 positive regulation of interferon-beta production;GO:0032648 regulation of interferon-beta production;GO:0032481 positive regulation of type I interferon production		Enzymes/ENZYME proteins/Transferases;RNA polymerase related proteins	Nucleus but not nucleoli				0	0	0	0	0	0	0	0	0	0	1	0	0	0	0	1	1	0	0	0
POLR3F	10621	symbol	H. sapiens	10621	H. sapiens	POLR3F	RNA polymerase III subunit F	GO:0032728 positive regulation of interferon-beta production;GO:0032648 regulation of interferon-beta production;GO:0032481 positive regulation of type I interferon production		RNA polymerase related proteins					0	0	0	0	0	0	0	0	0	0	1	0	0	0	0	1	1	0	0	0
POLR3GL	84265	symbol	H. sapiens	84265	H. sapiens	POLR3GL	RNA polymerase III subunit G like	GO:0006384 transcription initiation from RNA polymerase III promoter;GO:0032481 positive regulation of type I interferon production;GO:0006359 regulation of transcription from RNA polymerase III promoter		RNA polymerase related proteins	Cytoplasm			(M5898)HALLMARK DNA REPAIR	0	0	0	0	0	0	0	0	0	0	1	0	0	0	0	1	0	0	0	0
POLR3H	171568	symbol	H. sapiens	171568	H. sapiens	POLR3H	RNA polymerase III subunit H	GO:0006384 transcription initiation from RNA polymerase III promoter;GO:0032481 positive regulation of type I interferon production;GO:0032479 regulation of type I interferon production		RNA polymerase related proteins	Nucleus but not nucleoli				0	0	0	0	0	0	0	0	0	0	1	0	0	0	0	1	1	0	0	0
POLRMT	5442	symbol	H. sapiens	5442	H. sapiens	POLRMT	RNA polymerase mitochondrial	GO:0006391 transcription initiation from mitochondrial promoter;GO:0006390 transcription from mitochondrial promoter;GO:0000959 mitochondrial RNA metabolic process		Enzymes/ENZYME proteins/Transferases	Mitochondria				0	0	0	0	0	0	0	0	0	0	0	0	0	0	0	0	0	0	0	0
POMK	84197	symbol	H. sapiens	84197	H. sapiens	POMK	protein-O-mannose kinase	GO:0046835 carbohydrate phosphorylation;GO:0006493 protein O-linked glycosylation;GO:0001764 neuron migration	Other	Enzymes/{ENZYME proteins/Transferases,Kinases}	Nucleus				0	0	0	0	0	0	1	0	0	0	0	0	0	0	0	0	0	0	0	1
POMT1	10585	symbol	H. sapiens	10585	H. sapiens	POMT1	protein O-mannosyltransferase 1	GO:1904100 positive regulation of protein O-linked glycosylation;GO:1904098 regulation of protein O-linked glycosylation;GO:0071712 ER-associated misfolded protein catabolic process		Enzymes/ENZYME proteins/Transferases	Golgi apparatus				1	0	0	0	0	0	1	0	0	0	0	0	0	0	0	0	0	0	0	1
POP5	51367	symbol	H. sapiens	51367	H. sapiens	POP5	POP5 homolog, ribonuclease P/MRP subunit	GO:0001682 tRNA 5'-leader removal;GO:0009249 protein lipoylation;GO:0018065 protein-cofactor linkage		Enzymes/ENZYME proteins/Hydrolases	Nucleus;Nucleoli				0	0	0	1	0	0	0	0	0	0	0	0	0	0	0	0	0	0	0	0
POP7	10248	symbol	H. sapiens	10248	H. sapiens	POP7	POP7 homolog, ribonuclease P/MRP subunit	GO:0001682 tRNA 5'-leader removal;GO:0090502 RNA phosphodiester bond hydrolysis, endonucleolytic;GO:0008033 tRNA processing		Enzymes/ENZYME proteins/Hydrolases	Nucleoli;Vesicles			(M5925)HALLMARK E2F TARGETS	0	0	0	1	0	0	0	0	0	0	0	0	0	0	0	0	0	0	0	0
POU1F1	5449	symbol	H. sapiens	5449	H. sapiens	POU1F1	POU class 1 homeobox 1	GO:0060133 somatotropin secreting cell development;GO:0032962 positive regulation of inositol trisphosphate biosynthetic process;GO:0060126 somatotropin secreting cell differentiation		Transcription factors/Helix-turn-helix domains	Nucleus but not nucleoli;Cytoplasm		(M115)PID REG GR PATHWAY		0	1	0	0	0	1	1	0	0	0	0	0	0	0	0	0	0	0	1	0
PPAN	56342	symbol	H. sapiens	56342	H. sapiens	PPAN	peter pan homolog (Drosophila)	GO:0000027 ribosomal large subunit assembly;GO:0042255 ribosome assembly;GO:0042273 ribosomal large subunit biogenesis						(M5928)HALLMARK MYC TARGETS V2	0	0	0	1	0	0	0	0	0	0	0	0	0	0	0	0	0	0	0	0
PPBP	5473	symbol	H. sapiens	5473	H. sapiens	PPBP	pro-platelet basic protein	GO:0043312 neutrophil degranulation;GO:0002283 neutrophil activation involved in immune response;GO:1904659 glucose transmembrane transport				Ethanesulfonic Acid (Glucose transmembrane transporter activity)	(M5883)NABA SECRETED FACTORS; (M5885)NABA MATRISOME ASSOCIATED; (M5889)NABA MATRISOME	(M5953)HALLMARK KRAS SIGNALING UP	0	0	0	0	1	1	0	0	1	1	0	0	0	0	1	0	1	0	0	0
PPDPF	79144	symbol	H. sapiens	79144	H. sapiens	PPDPF	pancreatic progenitor cell differentiation and proliferation factor	GO:0031017 exocrine pancreas development;GO:0031016 pancreas development;GO:0001708 cell fate specification			Nucleus;Cytoskeleton (Microtubules)				0	0	0	0	0	0	0	0	0	0	0	0	0	0	0	0	0	0	0	0
PPIC	5480	symbol	H. sapiens	5480	H. sapiens	PPIC	peptidylprolyl isomerase C	GO:0000413 protein peptidyl-prolyl isomerization;GO:0018208 peptidyl-proline modification;GO:0006457 protein folding		Enzymes/ENZYME proteins/Isomerase		L-Proline (Peptidyl-prolyl cis-trans isomerase activity)			0	0	0	0	0	0	0	0	0	0	0	0	0	0	0	0	0	0	0	0
PPIF	10105	symbol	H. sapiens	10105	H. sapiens	PPIF	peptidylprolyl isomerase F	GO:0090324 negative regulation of oxidative phosphorylation;GO:2000276 negative regulation of oxidative phosphorylation uncoupler activity;GO:0010849 regulation of proton-transporting ATPase activity, rotational mechanism		Enzymes/ENZYME proteins/Isomerase		Cyclosporine (Peptidyl-prolyl cis-trans isomerase activity);L-Proline (Peptidyl-prolyl cis-trans isomerase activity);1-Methoxy-2-[2-(2-Methoxy-Ethoxy]-Ethane (Peptidyl-prolyl cis-trans isomerase activity);7-AMINO-4-METHYL-CHROMEN-2-ONE (Peptidyl-prolyl cis-trans isomerase activity)		(M5941)HALLMARK UV RESPONSE UP; (M5907)HALLMARK ESTROGEN RESPONSE LATE; (M5906)HALLMARK ESTROGEN RESPONSE EARLY	0	0	0	0	0	0	0	0	0	0	0	0	0	0	0	0	0	0	1	0
PPM1F	9647	symbol	H. sapiens	9647	H. sapiens	PPM1F	protein phosphatase, Mg2+/Mn2+ dependent 1F	GO:0051894 positive regulation of focal adhesion assembly;GO:0051496 positive regulation of stress fiber assembly;GO:0044387 negative regulation of protein kinase activity by regulation of protein phosphorylation		Enzymes/ENZYME proteins/Hydrolases	Nucleus but not nucleoli				0	0	0	0	0	1	0	0	0	1	0	0	0	0	0	0	0	0	0	0
PPM1K	152926	symbol	H. sapiens	152926	H. sapiens	PPM1K	protein phosphatase, Mg2+/Mn2+ dependent 1K	GO:0009083 branched-chain amino acid catabolic process;GO:0009081 branched-chain amino acid metabolic process;GO:0009063 cellular amino acid catabolic process		Enzymes/ENZYME proteins/Hydrolases	Mitochondria				1	1	0	0	0	0	0	1	0	0	0	0	0	0	0	0	0	0	0	0
PPP1R15B	84919	symbol	H. sapiens	84919	H. sapiens	PPP1R15B	protein phosphatase 1 regulatory subunit 15B	GO:1903912 negative regulation of endoplasmic reticulum stress-induced eIF2 alpha phosphorylation;GO:1903898 negative regulation of PERK-mediated unfolded protein response;GO:0036492 eiF2alpha phosphorylation in response to endoplasmic reticulum stress			Golgi apparatus			(M5905)HALLMARK ADIPOGENESIS	0	0	0	0	0	0	0	0	0	0	0	0	0	0	0	0	1	0	0	0
PPP1R1A	5502	symbol	H. sapiens	5502	H. sapiens	PPP1R1A	protein phosphatase 1 regulatory inhibitor subunit 1A	GO:0005977 glycogen metabolic process;GO:0006469 negative regulation of protein kinase activity;GO:0033673 negative regulation of kinase activity							0	0	0	0	0	0	1	0	0	0	0	1	0	0	0	0	0	0	0	0
PPP1R27	116729	symbol	H. sapiens	116729	H. sapiens	PPP1R27	protein phosphatase 1 regulatory subunit 27	GO:0010923 negative regulation of phosphatase activity;GO:0035305 negative regulation of dephosphorylation;GO:0010921 regulation of phosphatase activity							0	0	0	0	0	0	0	0	0	0	0	0	0	0	0	0	0	0	0	0
PPP3R2	5535	symbol	H. sapiens	5535	H. sapiens	PPP3R2	protein phosphatase 3 regulatory subunit B, beta					Cyclosporine (Calcium ion binding);ISA247 (Calcium ion binding)			0	0	0	0	0	0	0	0	0	0	0	0	0	0	0	0	0	0	0	0
PRKAB1	5564	symbol	H. sapiens	5564	H. sapiens	PRKAB1	protein kinase AMP-activated non-catalytic subunit beta 1	GO:0006633 fatty acid biosynthetic process;GO:1901796 regulation of signal transduction by p53 class mediator;GO:0051291 protein heterooligomerization			Cytoplasm	Adenosine monophosphate (Protein kinase activity);Metformin (Protein kinase activity)	(M87)PID LKB1 PATHWAY; (M237)PID VEGFR1 2 PATHWAY; (M145)PID P53 DOWNSTREAM PATHWAY	(M5939)HALLMARK P53 PATHWAY	0	1	0	0	0	0	0	0	0	0	0	0	0	0	0	0	0	0	0	0
PRKCI	5584	symbol	H. sapiens	5584	H. sapiens	PRKCI	protein kinase C iota	GO:0046326 positive regulation of glucose import;GO:0034351 negative regulation of glial cell apoptotic process;GO:2000353 positive regulation of endothelial cell apoptotic process	AGC Ser/Thr protein kinase family	Enzymes/{ENZYME proteins/Transferases,Kinases/AGC Ser/Thr protein kinases}	Cytoplasm	Rbt205 Inhibitor (Protein serine/threonine kinase activity)	(M247)PID INSULIN GLUCOSE PATHWAY; (M193)PID NEPHRIN NEPH1 PATHWAY; (M110)PID IL1 PATHWAY		0	0	0	0	1	0	0	0	0	0	0	0	0	0	0	0	0	0	0	0
PRKRIP1	79706	symbol	H. sapiens	79706	H. sapiens	PRKRIP1	PRKR interacting protein 1 (IL11 inducible)	GO:0006469 negative regulation of protein kinase activity;GO:0033673 negative regulation of kinase activity;GO:0001933 negative regulation of protein phosphorylation			Cytoskeleton (Actin filaments)				0	0	0	0	0	0	0	0	0	0	0	0	0	0	0	0	0	0	0	0
PROCR	10544	symbol	H. sapiens	10544	H. sapiens	PROCR	protein C receptor	GO:0050819 negative regulation of coagulation;GO:0050818 regulation of coagulation;GO:0007596 blood coagulation		CD markers	Nucleus	Drotrecogin alfa (Receptor activity);Phosphatidylethanolamine (Receptor activity)		(M5911)HALLMARK INTERFERON ALPHA RESPONSE; (M5939)HALLMARK P53 PATHWAY	0	0	0	0	0	0	0	0	0	0	0	0	1	0	0	0	0	0	0	0
PROSER3	148137	symbol	H. sapiens	148137	H. sapiens	PROSER3	proline and serine rich 3				Golgi apparatus				0	0	0	0	0	0	0	0	0	0	0	0	0	0	0	0	0	0	0	0
PRPH2	5961	symbol	H. sapiens	5961	H. sapiens	PRPH2	peripherin 2	GO:0060041 retina development in camera-type eye;GO:0007601 visual perception;GO:0050953 sensory perception of light stimulus		Transporters/Accessory Factors Involved in Transport					0	0	0	0	0	0	0	0	0	0	0	0	0	0	0	0	0	0	0	0
PRPSAP1	5635	symbol	H. sapiens	5635	H. sapiens	PRPSAP1	phosphoribosyl pyrophosphate synthetase associated protein 1	GO:0009165 nucleotide biosynthetic process;GO:1901293 nucleoside phosphate biosynthetic process;GO:0009117 nucleotide metabolic process			Cytoplasm				0	0	0	0	0	0	0	0	0	0	0	0	0	0	0	0	0	0	1	0
PRR11	55771	symbol	H. sapiens	55771	H. sapiens	PRR11	proline rich 11	GO:0051726 regulation of cell cycle;GO:0007049 cell cycle;GO:0050794 regulation of cellular process			Endoplasmic reticulum				0	0	0	0	0	0	0	0	0	0	0	0	0	0	0	0	0	0	0	0
PRR15	222171	symbol	H. sapiens	222171	H. sapiens	PRR15	proline rich 15	GO:0007275 multicellular organism development;GO:0048856 anatomical structure development;GO:0044707 single-multicellular organism process			Vesicles				0	0	0	0	0	0	0	0	0	0	0	0	0	0	0	0	0	0	0	0
PRR5	55615	symbol	H. sapiens	55615	H. sapiens	PRR5	proline rich 5	GO:0031295 T cell costimulation;GO:0050870 positive regulation of T cell activation;GO:0038203 TORC2 signaling					(M121)PID MTOR 4PATHWAY		0	0	0	0	0	1	0	0	0	0	0	0	0	0	0	0	0	0	0	0
PRSS35	167681	symbol	H. sapiens	167681	H. sapiens	PRSS35	protease, serine 35			Enzymes/Peptidases/Serine-type peptidases	Nucleus				0	0	0	0	0	0	0	0	0	0	0	0	0	0	0	0	0	0	0	0
PRSS8	5652	symbol	H. sapiens	5652	H. sapiens	PRSS8	protease, serine 8	GO:0010765 positive regulation of sodium ion transport;GO:0002028 regulation of sodium ion transport;GO:0006814 sodium ion transport		Enzymes/Peptidases/Serine-type peptidases	Nucleus	1-[4-(hydroxymethyl)phenyl]guanidine (Serine-type peptidase activity)			0	0	0	0	0	0	0	0	0	0	0	0	0	0	0	0	0	0	0	0
PSAPL1	768239	symbol	H. sapiens	768239	H. sapiens	PSAPL1	prosaposin-like 1 (gene/pseudogene)	GO:0060736 prostate gland growth;GO:0060742 epithelial cell differentiation involved in prostate gland development;GO:0006687 glycosphingolipid metabolic process			Cytoplasm				0	0	1	0	0	0	0	0	0	0	0	0	0	0	0	0	0	0	0	0
PSMB11	122706	symbol	H. sapiens	122706	H. sapiens	PSMB11	proteasome subunit beta 11	GO:0043374 CD8-positive, alpha-beta T cell differentiation;GO:0036037 CD8-positive, alpha-beta T cell activation;GO:0051437 positive regulation of ubiquitin-protein ligase activity involved in regulation of mitotic cell cycle transition		Enzymes/{ENZYME proteins/Hydrolases,Peptidases/Threonine-type peptidases}					0	1	0	0	1	1	0	0	0	0	0	0	0	0	1	0	1	0	0	0
PSMB7	5695	symbol	H. sapiens	5695	H. sapiens	PSMB7	proteasome subunit beta 7	GO:0051437 positive regulation of ubiquitin-protein ligase activity involved in regulation of mitotic cell cycle transition;GO:0051436 negative regulation of ubiquitin-protein ligase activity involved in mitotic cell cycle;GO:0002223 stimulatory C-type lectin receptor signaling pathway		Enzymes/{ENZYME proteins/Hydrolases,Peptidases/Threonine-type peptidases}	Nucleus but not nucleoli	(3AR,6R,6AS)-6-((S)-((S)-CYCLOHEX-2-ENYL)(HYDROXY)METHYL)-6A-METHYL-4-OXO-HEXAHYDRO-2H-FURO[3,2-C]PYRROLE-6-CARBALDEHYDE (Threonine-type endopeptidase activity)			0	1	0	0	1	0	0	0	1	0	0	0	0	0	1	0	1	0	0	0
PSMC1	5700	symbol	H. sapiens	5700	H. sapiens	PSMC1	proteasome 26S subunit, ATPase 1	GO:0051437 positive regulation of ubiquitin-protein ligase activity involved in regulation of mitotic cell cycle transition;GO:0051436 negative regulation of ubiquitin-protein ligase activity involved in mitotic cell cycle;GO:0045899 positive regulation of RNA polymerase II transcriptional preinitiation complex assembly			Nucleus but not nucleoli;Cytoplasm				1	1	0	0	1	0	0	0	0	0	1	0	0	0	1	0	1	0	0	0
PTAFR	5724	symbol	H. sapiens	5724	H. sapiens	PTAFR	platelet activating factor receptor	GO:0043315 positive regulation of neutrophil degranulation;GO:1902565 positive regulation of neutrophil activation;GO:1902943 positive regulation of voltage-gated chloride channel activity		G-protein coupled receptors/GPCRs excl olfactory receptors;Transporters	Vesicles			(M5932)HALLMARK INFLAMMATORY RESPONSE	0	1	0	0	1	1	1	0	1	1	0	0	0	0	0	1	1	0	1	0
PTCD2	79810	symbol	H. sapiens	79810	H. sapiens	PTCD2	pentatricopeptide repeat domain 2	GO:0055010 ventricular cardiac muscle tissue morphogenesis;GO:0055008 cardiac muscle tissue morphogenesis;GO:0003208 cardiac ventricle morphogenesis						(M5953)HALLMARK KRAS SIGNALING UP	0	0	0	0	0	0	0	0	0	0	0	0	0	0	0	0	0	0	0	0
PTGDS	5730	symbol	H. sapiens	5730	H. sapiens	PTGDS	prostaglandin D2 synthase	GO:0019371 cyclooxygenase pathway;GO:2000255 negative regulation of male germ cell proliferation;GO:0001516 prostaglandin biosynthetic process		Enzymes/ENZYME proteins/Isomerase				(M5934)HALLMARK XENOBIOTIC METABOLISM	0	1	0	0	0	0	0	0	0	0	0	0	0	0	0	0	0	0	0	0
PTGER3	5733	symbol	H. sapiens	5733	H. sapiens	PTGER3	prostaglandin E receptor 3	GO:0031622 positive regulation of fever generation;GO:0060455 negative regulation of gastric acid secretion;GO:0031620 regulation of fever generation		G-protein coupled receptors/GPCRs excl olfactory receptors		Bimatoprost (Rna polymerase ii transcription factor activity, ligand-activated sequence-specific dna binding);Dinoprostone (Rna polymerase ii transcription factor activity, ligand-activated sequence-specific dna binding);Misoprostol (Rna polymerase ii transcription factor activity, ligand-activated sequence-specific dna binding)		(M5907)HALLMARK ESTROGEN RESPONSE LATE; (M5905)HALLMARK ADIPOGENESIS	0	0	0	0	0	0	0	0	0	1	0	0	0	1	0	0	0	1	0	0
PTGES	9536	symbol	H. sapiens	9536	H. sapiens	PTGES	prostaglandin E synthase	GO:0019371 cyclooxygenase pathway;GO:0001516 prostaglandin biosynthetic process;GO:0046457 prostanoid biosynthetic process		Enzymes/ENZYME proteins/Isomerase	Endoplasmic reticulum			(M5906)HALLMARK ESTROGEN RESPONSE EARLY; (M5907)HALLMARK ESTROGEN RESPONSE LATE; (M5934)HALLMARK XENOBIOTIC METABOLISM	0	1	0	0	1	0	0	0	0	1	0	0	0	1	0	0	1	0	0	0
PTGES2	80142	symbol	H. sapiens	80142	H. sapiens	PTGES2	prostaglandin E synthase 2	GO:0001516 prostaglandin biosynthetic process;GO:0046457 prostanoid biosynthetic process;GO:0006693 prostaglandin metabolic process		Enzymes/ENZYME proteins/Isomerase	Mitochondria		(M161)PID IFNG PATHWAY		0	1	0	0	0	0	0	0	1	0	0	1	0	0	0	0	0	1	0	0
PTPRCAP	5790	symbol	H. sapiens	5790	H. sapiens	PTPRCAP	protein tyrosine phosphatase, receptor type C associated protein	GO:0006952 defense response;GO:0006950 response to stress;GO:0050896 response to stimulus							0	0	0	0	0	0	0	0	0	0	0	0	0	0	0	0	0	0	0	0
PTRF	284119	symbol	H. sapiens	284119	H. sapiens	PTRF	polymerase I and transcript release factor	GO:0006363 termination of RNA polymerase I transcription;GO:0006361 transcription initiation from RNA polymerase I promoter;GO:0006353 DNA-templated transcription, termination						(M5891)HALLMARK HYPOXIA; (M5905)HALLMARK ADIPOGENESIS	0	0	0	0	0	0	0	0	0	0	0	0	0	0	0	0	0	0	0	0
PTS	5805	symbol	H. sapiens	5805	H. sapiens	PTS	6-pyruvoyltetrahydropterin synthase	GO:0006729 tetrahydrobiopterin biosynthetic process;GO:0046146 tetrahydrobiopterin metabolic process;GO:0050999 regulation of nitric-oxide synthase activity		Enzymes/ENZYME proteins/Lyases	Cytoplasm	Biopterin (Metal ion binding)		(M5935)HALLMARK FATTY ACID METABOLISM; (M5934)HALLMARK XENOBIOTIC METABOLISM	0	1	0	0	0	0	0	0	0	0	0	0	0	0	0	0	0	0	0	0
PWP2	5822	symbol	H. sapiens	5822	H. sapiens	PWP2	PWP2 periodic tryptophan protein homolog (yeast)	GO:0000028 ribosomal small subunit assembly;GO:0000462 maturation of SSU-rRNA from tricistronic rRNA transcript (SSU-rRNA, 5.8S rRNA, LSU-rRNA);GO:0030490 maturation of SSU-rRNA							0	0	0	1	0	0	0	0	0	0	0	0	0	0	0	0	0	0	0	0
PXDC1	221749	symbol	H. sapiens	221749	H. sapiens	PXDC1	PX domain containing 1								0	0	0	0	0	0	0	0	0	0	0	0	0	0	0	0	0	0	0	0
PYCR2	29920	symbol	H. sapiens	29920	H. sapiens	PYCR2	pyrroline-5-carboxylate reductase family member 2	GO:0055129 L-proline biosynthetic process;GO:0006561 proline biosynthetic process;GO:0006560 proline metabolic process		Enzymes/ENZYME proteins/Oxidoreductases	Mitochondria	NADH (Pyrroline-5-carboxylate reductase activity);L-Proline (Pyrroline-5-carboxylate reductase activity)			0	1	0	0	0	0	0	0	0	0	0	1	0	0	0	0	0	0	0	0
QRSL1	55278	symbol	H. sapiens	55278	H. sapiens	QRSL1	glutaminyl-tRNA synthase (glutamine-hydrolyzing)-like 1	GO:0070681 glutaminyl-tRNAGln biosynthesis via transamidation;GO:0043039 tRNA aminoacylation;GO:0043038 amino acid activation		Enzymes/ENZYME proteins/Ligase	Vesicles				0	1	0	1	0	0	0	0	0	0	0	0	0	0	0	0	0	0	0	0
R3HDM4	91300	symbol	H. sapiens	91300	H. sapiens	R3HDM4	R3H domain containing 4				Nucleus				0	0	0	0	0	0	0	0	0	0	0	0	0	0	0	0	0	0	0	0
RAB22A	57403	symbol	H. sapiens	57403	H. sapiens	RAB22A	RAB22A, member RAS oncogene family	GO:0097494 regulation of vesicle size;GO:0007032 endosome organization;GO:0032535 regulation of cellular component size			Centrosome			(M5910)HALLMARK PROTEIN SECRETION	0	0	0	0	0	0	0	0	0	0	0	0	0	0	0	0	0	0	0	0
RAB31	11031	symbol	H. sapiens	11031	H. sapiens	RAB31	RAB31, member RAS oncogene family	GO:0043001 Golgi to plasma membrane protein transport;GO:0006893 Golgi to plasma membrane transport;GO:0032869 cellular response to insulin stimulus						(M5896)HALLMARK TGF BETA SIGNALING; (M5907)HALLMARK ESTROGEN RESPONSE LATE; (M5906)HALLMARK ESTROGEN RESPONSE EARLY	0	0	0	0	0	0	0	0	1	0	0	0	0	0	0	0	0	0	0	0
RAB32	10981	symbol	H. sapiens	10981	H. sapiens	RAB32	RAB32, member RAS oncogene family	GO:0035646 endosome to melanosome transport;GO:1903232 melanosome assembly;GO:0043485 endosome to pigment granule transport			Cytoplasm				0	0	0	0	0	0	0	0	0	0	0	0	0	0	0	0	0	0	0	0
RAB36	9609	symbol	H. sapiens	9609	H. sapiens	RAB36	RAB36, member RAS oncogene family	GO:0007264 small GTPase mediated signal transduction;GO:0015031 protein transport;GO:0045184 establishment of protein localization							0	0	0	0	0	0	0	0	0	0	0	0	0	0	0	0	0	0	0	0
RAB3B	5865	symbol	H. sapiens	5865	H. sapiens	RAB3B	RAB3B, member RAS oncogene family	GO:0051586 positive regulation of dopamine uptake involved in synaptic transmission;GO:0051944 positive regulation of catecholamine uptake involved in synaptic transmission;GO:0051584 regulation of dopamine uptake involved in synaptic transmission							0	0	0	0	0	0	0	0	0	0	0	0	0	0	0	0	0	0	0	0
RAD50	10111	symbol	H. sapiens	10111	H. sapiens	RAD50	RAD50 double strand break repair protein	GO:1904354 negative regulation of telomere capping;GO:0031860 telomeric 3' overhang formation;GO:1904353 regulation of telomere capping			Nucleus but not nucleoli		(M258)PID BARD1 PATHWAY; (M84)PID ATM PATHWAY; (M1)PID FANCONI PATHWAY	(M5925)HALLMARK E2F TARGETS	0	0	0	0	0	0	0	0	0	0	0	0	0	0	0	0	0	0	1	0
RAD9B	144715	symbol	H. sapiens	144715	H. sapiens	RAD9B	RAD9 checkpoint clamp component B	GO:0031573 intra-S DNA damage checkpoint;GO:0000076 DNA replication checkpoint;GO:0044773 mitotic DNA damage checkpoint							0	0	0	0	0	0	0	0	0	0	0	0	0	0	0	0	0	0	0	0
RAG2	5897	symbol	H. sapiens	5897	H. sapiens	RAG2	recombination activating 2	GO:0002331 pre-B cell allelic exclusion;GO:0002329 pre-B cell differentiation;GO:0002360 T cell lineage commitment					(M195)PID CMYB PATHWAY		0	0	0	0	0	1	0	0	0	0	0	0	0	0	0	0	0	0	0	0
RAMP3	10268	symbol	H. sapiens	10268	H. sapiens	RAMP3	receptor activity modifying protein 3	GO:0090004 positive regulation of establishment of protein localization to plasma membrane;GO:0001921 positive regulation of receptor recycling;GO:0086103 G-protein coupled receptor signaling pathway involved in heart process				Pramlintide (Receptor activity)			0	0	0	0	0	0	0	0	0	0	0	0	0	0	0	0	0	0	0	0
RASD2	23551	symbol	H. sapiens	23551	H. sapiens	RASD2	RASD family member 2	GO:0033235 positive regulation of protein sumoylation;GO:0001963 synaptic transmission, dopaminergic;GO:0043949 regulation of cAMP-mediated signaling			Plasma membrane;Cytoplasm				0	0	0	0	0	0	0	0	0	0	0	0	0	0	0	0	0	0	0	0
RASEF	158158	symbol	H. sapiens	158158	H. sapiens	RASEF	RAS and EF-hand domain containing	GO:0007264 small GTPase mediated signal transduction;GO:0035556 intracellular signal transduction;GO:0007165 signal transduction			Microtubule organizing center;Cytoskeleton (Microtubules)				0	0	0	0	0	0	0	0	0	0	0	0	0	0	0	0	0	0	0	0
RASGEF1C	255426	symbol	H. sapiens	255426	H. sapiens	RASGEF1C	RasGEF domain family member 1C	GO:0043547 positive regulation of GTPase activity;GO:0043087 regulation of GTPase activity;GO:0051345 positive regulation of hydrolase activity							0	0	0	0	0	0	0	0	0	0	0	0	0	0	0	0	0	0	0	0
RBBP9	10741	symbol	H. sapiens	10741	H. sapiens	RBBP9	RB binding protein 9, serine hydrolase	GO:0042127 regulation of cell proliferation;GO:0008283 cell proliferation;GO:0050794 regulation of cellular process			Nucleus				0	0	0	0	0	0	0	0	0	0	0	0	0	0	0	0	0	0	0	0
RBM11	54033	symbol	H. sapiens	54033	H. sapiens	RBM11	RNA binding motif protein 11	GO:0000381 regulation of alternative mRNA splicing, via spliceosome;GO:0000380 alternative mRNA splicing, via spliceosome;GO:0048024 regulation of mRNA splicing, via spliceosome			Nucleus but not nucleoli				0	0	0	0	0	0	0	0	0	0	0	0	0	0	0	0	0	0	0	0
RBM34	23029	symbol	H. sapiens	23029	H. sapiens	RBM34	RNA binding motif protein 34				Nucleoli				0	0	0	0	0	0	0	0	0	0	0	0	0	0	0	0	0	0	0	0
RBM38	55544	symbol	H. sapiens	55544	H. sapiens	RBM38	RNA binding motif protein 38	GO:0010830 regulation of myotube differentiation;GO:0051153 regulation of striated muscle cell differentiation;GO:0014902 myotube differentiation			Nucleus but not nucleoli			(M5945)HALLMARK HEME METABOLISM	0	0	0	0	0	0	0	0	0	0	0	0	0	0	0	0	0	0	0	0
RBP2	5948	symbol	H. sapiens	5948	H. sapiens	RBP2	retinol binding protein 2	GO:0006776 vitamin A metabolic process;GO:0001523 retinoid metabolic process;GO:0016101 diterpenoid metabolic process		Transporters/Accessory Factors Involved in Transport	Golgi apparatus		(M279)PID RB 1PATHWAY		0	0	0	0	0	0	0	0	0	0	0	0	0	0	0	0	0	0	0	0
RCL1	10171	symbol	H. sapiens	10171	H. sapiens	RCL1	RNA terminal phosphate cyclase like 1	GO:0000480 endonucleolytic cleavage in 5'-ETS of tricistronic rRNA transcript (SSU-rRNA, 5.8S rRNA, LSU-rRNA);GO:0000447 endonucleolytic cleavage in ITS1 to separate SSU-rRNA from 5.8S rRNA and LSU-rRNA from tricistronic rRNA transcript (SSU-rRNA, 5.8S rRNA, LSU-rRNA);GO:0000479 endonucleolytic cleavage of tricistronic rRNA transcript (SSU-rRNA, 5.8S rRNA, LSU-rRNA)						(M5928)HALLMARK MYC TARGETS V2; (M5945)HALLMARK HEME METABOLISM	0	0	0	1	0	0	0	0	0	0	0	0	0	0	0	0	0	0	0	0
RCVRN	5957	symbol	H. sapiens	5957	H. sapiens	RCVRN	recoverin	GO:0031284 positive regulation of guanylate cyclase activity;GO:0031282 regulation of guanylate cyclase activity;GO:0030828 positive regulation of cGMP biosynthetic process				MYRISTIC ACID (Calcium sensitive guanylate cyclase activator activity)			0	0	0	0	0	0	0	0	0	0	0	0	0	0	0	0	0	0	1	1
RDH16	8608	symbol	H. sapiens	8608	H. sapiens	RDH16	retinol dehydrogenase 16 (all-trans)	GO:0006629 lipid metabolic process;GO:0055114 oxidation-reduction process;GO:0044710 single-organism metabolic process						(M5935)HALLMARK FATTY ACID METABOLISM	0	0	0	0	0	0	0	0	0	0	0	1	0	0	0	0	0	0	0	0
RDH8	50700	symbol	H. sapiens	50700	H. sapiens	RDH8	retinol dehydrogenase 8 (all-trans)	GO:0006703 estrogen biosynthetic process;GO:0042572 retinol metabolic process;GO:0008210 estrogen metabolic process				Vitamin A (Retinol dehydrogenase activity)			0	1	0	0	0	0	0	0	0	0	0	1	0	0	0	0	0	0	0	0
RDM1	201299	symbol	H. sapiens	201299	H. sapiens	RDM1	RAD52 motif containing 1								0	0	0	0	0	0	0	0	0	0	0	0	0	0	0	0	0	0	0	0
RECK	8434	symbol	H. sapiens	8434	H. sapiens	RECK	reversion inducing cysteine rich protein with kazal motifs	GO:1904684 negative regulation of metalloendopeptidase activity;GO:1904683 regulation of metalloendopeptidase activity;GO:1905049 negative regulation of metallopeptidase activity							0	0	0	0	0	0	0	0	0	0	0	0	0	0	0	0	0	0	0	0
RECQL4	9401	symbol	H. sapiens	9401	H. sapiens	RECQL4	RecQ like helicase 4	GO:0000733 DNA strand renaturation;GO:0032508 DNA duplex unwinding;GO:0006284 base-excision repair			Nucleus				0	0	0	0	0	0	0	0	0	0	0	0	0	0	0	0	0	0	0	0
RECQL5	9400	symbol	H. sapiens	9400	H. sapiens	RECQL5	RecQ like helicase 5	GO:2000042 negative regulation of double-strand break repair via homologous recombination;GO:0072757 cellular response to camptothecin;GO:1990414 replication-born double-strand break repair via sister chromatid exchange		Enzymes/ENZYME proteins/Hydrolases	Nucleus;Cytoplasm				0	0	0	0	0	0	0	0	0	0	0	0	0	0	0	0	0	0	0	0
REEP5	7905	symbol	H. sapiens	7905	H. sapiens	REEP5	receptor accessory protein 5	GO:0008150 biological_process						(M5905)HALLMARK ADIPOGENESIS	0	0	0	0	0	0	0	0	0	0	0	0	0	0	0	0	0	0	0	0
REEP6	92840	symbol	H. sapiens	92840	H. sapiens	REEP6	receptor accessory protein 6	GO:0032386 regulation of intracellular transport;GO:0060341 regulation of cellular localization;GO:0051049 regulation of transport						(M5935)HALLMARK FATTY ACID METABOLISM; (M5905)HALLMARK ADIPOGENESIS	0	0	0	0	0	0	0	0	0	0	0	0	0	0	0	0	0	0	0	0
REXO1	57455	symbol	H. sapiens	57455	H. sapiens	REXO1	RNA exonuclease 1 homolog	GO:0090305 nucleic acid phosphodiester bond hydrolysis;GO:0090304 nucleic acid metabolic process;GO:0006139 nucleobase-containing compound metabolic process							0	0	0	0	0	0	0	0	0	0	0	0	0	0	0	0	0	0	0	0
RFC2	5982	symbol	H. sapiens	5982	H. sapiens	RFC2	replication factor C subunit 2	GO:1900264 positive regulation of DNA-directed DNA polymerase activity;GO:1900262 regulation of DNA-directed DNA polymerase activity;GO:0070987 error-free translesion synthesis			Nucleus but not nucleoli		(M46)PID ATR PATHWAY; (M1)PID FANCONI PATHWAY	(M5898)HALLMARK DNA REPAIR; (M5925)HALLMARK E2F TARGETS	0	0	0	0	0	0	0	0	0	0	0	0	0	0	0	0	0	0	0	0
RHAG	6005	symbol	H. sapiens	6005	H. sapiens	RHAG	Rh-associated glycoprotein	GO:0035378 carbon dioxide transmembrane transport;GO:0060586 multicellular organismal iron ion homeostasis;GO:0015670 carbon dioxide transport		CD markers;Transporters/Transporter channels and pores				(M5945)HALLMARK HEME METABOLISM	0	0	0	0	0	0	0	0	0	0	0	0	0	0	1	0	0	1	0	0
RHBDL3	162494	symbol	H. sapiens	162494	H. sapiens	RHBDL3	rhomboid like 3	GO:0016485 protein processing;GO:0051604 protein maturation;GO:0006508 proteolysis		Enzymes/{ENZYME proteins/Hydrolases,Peptidases/Serine-type peptidases}	Nucleus but not nucleoli				0	0	0	0	0	0	0	0	0	0	0	0	0	0	0	0	0	0	0	0
RHOBTB3	22836	symbol	H. sapiens	22836	H. sapiens	RHOBTB3	Rho related BTB domain containing 3	GO:0008584 male gonad development;GO:0046546 development of primary male sexual characteristics;GO:0042147 retrograde transport, endosome to Golgi						(M5906)HALLMARK ESTROGEN RESPONSE EARLY	0	0	0	0	0	0	0	0	0	0	0	0	0	0	0	0	0	0	0	0
RHOJ	57381	symbol	H. sapiens	57381	H. sapiens	RHOJ	ras homolog family member J	GO:0061299 retina vasculature morphogenesis in camera-type eye;GO:0061298 retina vasculature development in camera-type eye;GO:0060041 retina development in camera-type eye							0	0	0	0	0	0	0	0	0	0	0	0	0	0	0	0	0	0	0	0
RIOK3	8780	symbol	H. sapiens	8780	H. sapiens	RIOK3	RIO kinase 3	GO:0006364 rRNA processing;GO:0016072 rRNA metabolic process;GO:0034470 ncRNA processing	Atypical: RIO-type Ser/Thr kinase family	Enzymes/{ENZYME proteins/Transferases,Kinases/Atypical kinases}	Plasma membrane;Cytoplasm			(M5905)HALLMARK ADIPOGENESIS; (M5945)HALLMARK HEME METABOLISM	0	0	0	1	0	0	0	0	0	0	0	0	0	0	0	0	0	0	0	0
RIPK4	54101	symbol	H. sapiens	54101	H. sapiens	RIPK4	receptor interacting serine/threonine kinase 4	GO:0051092 positive regulation of NF-kappaB transcription factor activity;GO:0051091 positive regulation of sequence-specific DNA binding transcription factor activity;GO:0051090 regulation of sequence-specific DNA binding transcription factor activity		Enzymes/{ENZYME proteins/Transferases,Kinases/TKL Ser/Thr protein kinases}					0	0	0	0	0	0	0	0	0	0	0	0	0	0	0	0	0	0	0	0
RMI2	116028	symbol	H. sapiens	116028	H. sapiens	RMI2	RecQ mediated genome instability 2	GO:0000732 strand displacement;GO:0000731 DNA synthesis involved in DNA repair;GO:1901796 regulation of signal transduction by p53 class mediator			Nucleus				0	0	0	0	0	0	0	0	0	0	0	0	0	0	0	0	0	0	0	0
RMND5B	64777	symbol	H. sapiens	64777	H. sapiens	RMND5B	required for meiotic nuclear division 5 homolog B	GO:0042787 protein ubiquitination involved in ubiquitin-dependent protein catabolic process;GO:0043161 proteasome-mediated ubiquitin-dependent protein catabolic process;GO:0010498 proteasomal protein catabolic process			Nucleus but not nucleoli				0	0	0	0	0	0	0	0	0	0	0	0	0	0	0	0	0	0	0	0
RNASE4	6038	symbol	H. sapiens	6038	H. sapiens	RNASE4	ribonuclease A family member 4	GO:0006379 mRNA cleavage;GO:0090502 RNA phosphodiester bond hydrolysis, endonucleolytic;GO:0090501 RNA phosphodiester bond hydrolysis				2'-Deoxyuridine 3'-Monophosphate (Ribonuclease activity)			0	0	0	0	0	0	0	0	0	0	0	0	0	0	0	0	0	0	0	0
RNASE6	6039	symbol	H. sapiens	6039	H. sapiens	RNASE6	ribonuclease A family member k6	GO:0006401 RNA catabolic process;GO:0090501 RNA phosphodiester bond hydrolysis;GO:0034655 nucleobase-containing compound catabolic process							0	0	0	0	0	0	0	0	0	0	0	0	0	0	0	0	0	0	0	0
RNASEK	440400	symbol	H. sapiens	440400	H. sapiens	RNASEK	ribonuclease K	GO:0009303 rRNA transcription;GO:0090502 RNA phosphodiester bond hydrolysis, endonucleolytic;GO:0098781 ncRNA transcription							0	0	0	1	0	0	0	0	0	0	0	0	0	0	0	0	0	0	0	0
RNASEL	6041	symbol	H. sapiens	6041	H. sapiens	RNASEL	ribonuclease L	GO:2001275 positive regulation of glucose import in response to insulin stimulus;GO:2001273 regulation of glucose import in response to insulin stimulus;GO:0046326 positive regulation of glucose import	Other	Enzymes/Kinases	Cytoplasm			(M5902)HALLMARK APOPTOSIS	0	0	0	1	1	0	0	0	0	0	0	0	0	0	1	0	1	0	0	0
RNF112	7732	symbol	H. sapiens	7732	H. sapiens	RNF112	ring finger protein 112	GO:0045687 positive regulation of glial cell differentiation;GO:0071158 positive regulation of cell cycle arrest;GO:0014015 positive regulation of gliogenesis			Nucleus but not nucleoli				0	0	0	0	0	0	0	0	0	0	0	0	0	0	0	0	0	0	0	0
RNF114	55905	symbol	H. sapiens	55905	H. sapiens	RNF114	ring finger protein 114	GO:0032436 positive regulation of proteasomal ubiquitin-dependent protein catabolic process;GO:1901800 positive regulation of proteasomal protein catabolic process;GO:0032434 regulation of proteasomal ubiquitin-dependent protein catabolic process			Plasma membrane;Cytoplasm				0	0	0	0	0	0	0	0	0	0	0	0	0	0	0	0	0	0	0	0
RNF122	79845	symbol	H. sapiens	79845	H. sapiens	RNF122	ring finger protein 122	GO:0042787 protein ubiquitination involved in ubiquitin-dependent protein catabolic process;GO:0043161 proteasome-mediated ubiquitin-dependent protein catabolic process;GO:0000209 protein polyubiquitination							0	0	0	0	0	0	0	0	0	0	0	0	0	0	0	0	0	0	0	0
RNF157	114804	symbol	H. sapiens	114804	H. sapiens	RNF157	ring finger protein 157				Nucleoli;Golgi apparatus;Vesicles				0	0	0	0	0	0	0	0	0	0	0	0	0	0	0	0	0	0	0	0
RNF186	54546	symbol	H. sapiens	54546	H. sapiens	RNF186	ring finger protein 186								0	0	0	0	0	0	0	0	0	0	0	0	0	0	0	0	0	0	0	0
RNF187	149603	symbol	H. sapiens	149603	H. sapiens	RNF187	ring finger protein 187	GO:0070936 protein K48-linked ubiquitination;GO:0051865 protein autoubiquitination;GO:0043161 proteasome-mediated ubiquitin-dependent protein catabolic process			Nucleus but not nucleoli;Cytoplasm				0	0	0	0	0	0	0	0	0	0	0	0	0	0	0	0	0	0	0	0
ROGDI	79641	symbol	H. sapiens	79641	H. sapiens	ROGDI	rogdi homolog	GO:0042475 odontogenesis of dentin-containing tooth;GO:0042476 odontogenesis;GO:0030097 hemopoiesis							0	0	0	0	0	0	0	0	0	0	0	0	0	0	0	0	0	0	0	0
RP9	6100	symbol	H. sapiens	6100	H. sapiens	RP9	retinitis pigmentosa 9 (autosomal dominant)	GO:0050890 cognition;GO:0008380 RNA splicing;GO:0006396 RNA processing			Nucleus				0	0	0	0	0	0	0	0	0	0	0	0	0	0	0	0	0	0	0	0
RPA2	6118	symbol	H. sapiens	6118	H. sapiens	RPA2	replication protein A2	GO:0031571 mitotic G1 DNA damage checkpoint;GO:0006295 nucleotide-excision repair, DNA incision, 3'-to lesion;GO:0006293 nucleotide-excision repair, preincision complex stabilization			Nucleus but not nucleoli		(M46)PID ATR PATHWAY; (M1)PID FANCONI PATHWAY	(M5898)HALLMARK DNA REPAIR; (M5901)HALLMARK G2M CHECKPOINT; (M5925)HALLMARK E2F TARGETS	0	0	0	0	0	0	0	0	0	0	0	0	0	0	0	0	0	0	0	0
RPL15	6138	symbol	H. sapiens	6138	H. sapiens	RPL15	ribosomal protein L15	GO:0006614 SRP-dependent cotranslational protein targeting to membrane;GO:0000184 nuclear-transcribed mRNA catabolic process, nonsense-mediated decay;GO:0019083 viral transcription		Ribosomal proteins		Alpha-Hydroxy-Beta-Phenyl-Propionic Acid (Structural constituent of ribosome);Anisomycin (Structural constituent of ribosome);Puromycin (Structural constituent of ribosome)			0	0	0	1	0	0	0	0	0	0	0	0	0	0	0	0	0	0	0	0
RPL21	6144	symbol	H. sapiens	6144	H. sapiens	RPL21	ribosomal protein L21	GO:0006614 SRP-dependent cotranslational protein targeting to membrane;GO:0000184 nuclear-transcribed mRNA catabolic process, nonsense-mediated decay;GO:0019083 viral transcription		Ribosomal proteins	Cytoplasm				0	0	0	1	0	0	0	0	0	0	0	0	0	0	0	0	0	0	0	0
RPL39	6170	symbol	H. sapiens	6170	H. sapiens	RPL39	ribosomal protein L39	GO:0002227 innate immune response in mucosa;GO:0006614 SRP-dependent cotranslational protein targeting to membrane;GO:0000184 nuclear-transcribed mRNA catabolic process, nonsense-mediated decay		Ribosomal proteins				(M5950)HALLMARK ALLOGRAFT REJECTION	0	0	0	1	0	0	0	0	0	0	0	0	0	0	0	0	1	0	0	0
RPRD1A	55197	symbol	H. sapiens	55197	H. sapiens	RPRD1A	regulation of nuclear pre-mRNA domain containing 1A	GO:0070940 dephosphorylation of RNA polymerase II C-terminal domain;GO:0042795 snRNA transcription from RNA polymerase II promoter;GO:0009301 snRNA transcription			Nucleus;Golgi apparatus				0	0	0	1	0	0	0	0	0	0	0	0	0	0	0	0	0	0	0	0
RPS19BP1	91582	symbol	H. sapiens	91582	H. sapiens	RPS19BP1	ribosomal protein S19 binding protein 1				Nucleoli				0	0	0	0	0	0	0	0	0	0	0	0	0	0	0	0	0	0	0	0
RPS6KB2	6199	symbol	H. sapiens	6199	H. sapiens	RPS6KB2	ribosomal protein S6 kinase B2	GO:0045948 positive regulation of translational initiation;GO:0006446 regulation of translational initiation;GO:0045727 positive regulation of translation	AGC Ser/Thr protein kinase family	Enzymes/{ENZYME proteins/Transferases,Kinases/AGC Ser/Thr protein kinases}	Cytoplasm				0	0	0	0	0	0	0	0	0	0	0	0	0	0	0	0	0	0	0	0
RRN3	54700	symbol	H. sapiens	54700	H. sapiens	RRN3	RRN3 homolog, RNA polymerase I transcription factor	GO:0001180 transcription initiation from RNA polymerase I promoter for nuclear large rRNA transcript;GO:1902254 negative regulation of intrinsic apoptotic signaling pathway by p53 class mediator;GO:1902253 regulation of intrinsic apoptotic signaling pathway by p53 class mediator			Nucleoli		(M121)PID MTOR 4PATHWAY		0	0	0	1	0	0	0	0	0	0	0	0	0	0	0	0	0	0	0	0
RS1	6247	symbol	H. sapiens	6247	H. sapiens	RS1	retinoschisin 1	GO:0016062 adaptation of rhodopsin mediated signaling;GO:0036367 light adaption;GO:0016056 rhodopsin mediated signaling pathway							0	0	0	0	0	0	0	0	0	0	0	0	0	0	0	0	0	0	0	0
RSPO2	340419	symbol	H. sapiens	340419	H. sapiens	RSPO2	R-spondin 2	GO:0042489 negative regulation of odontogenesis of dentin-containing tooth;GO:0060535 trachea cartilage morphogenesis;GO:0042483 negative regulation of odontogenesis					(M3008)NABA ECM GLYCOPROTEINS; (M5884)NABA CORE MATRISOME; (M5889)NABA MATRISOME		0	0	0	0	0	0	0	0	0	0	0	0	0	0	0	0	0	0	0	0
RTFDC1	51507	symbol	H. sapiens	51507	H. sapiens	RTFDC1	replication termination factor 2 domain containing 1	GO:0071171 site-specific DNA replication termination at RTS1 barrier;GO:0071516 establishment of imprinting at mating-type locus;GO:1902979 mitotic DNA replication termination			Nucleus;Nucleoli				0	0	0	0	0	0	0	0	0	0	0	0	0	0	0	0	0	0	0	0
RWDD4	201965	symbol	H. sapiens	201965	H. sapiens	RWDD4	RWD domain containing 4				Cytoskeleton (Intermediate filaments)				0	0	0	0	0	0	0	0	0	0	0	0	0	0	0	0	0	0	0	0
S100A3	6274	symbol	H. sapiens	6274	H. sapiens	S100A3	S100 calcium binding protein A3				Cytoplasm		(M5883)NABA SECRETED FACTORS; (M5885)NABA MATRISOME ASSOCIATED; (M5889)NABA MATRISOME		0	0	0	0	0	0	0	0	0	0	0	0	0	0	0	0	0	0	0	0
S100B	6285	symbol	H. sapiens	6285	H. sapiens	S100B	S100 calcium binding protein B	GO:2001015 negative regulation of skeletal muscle cell differentiation;GO:0048642 negative regulation of skeletal muscle tissue development;GO:2001014 regulation of skeletal muscle cell differentiation			Vesicles	Olopatadine (Zinc ion binding);Calcium (Zinc ion binding);N-Formylmethionine (Zinc ion binding);ONO-2506 (Zinc ion binding);(Z)-2-[2-(4-methylpiperazin-1-yl)benzyl]diazenecarbothioamide (Zinc ion binding);2-[(5-hex-1-yn-1-ylfuran-2-yl)carbonyl]-N-methylhydrazinecarbothioamide (Zinc ion binding)	(M5883)NABA SECRETED FACTORS; (M5885)NABA MATRISOME ASSOCIATED; (M5889)NABA MATRISOME		0	0	0	0	0	0	0	0	0	0	0	0	0	0	0	0	1	0	0	0
S1PR2	9294	symbol	H. sapiens	9294	H. sapiens	S1PR2	sphingosine-1-phosphate receptor 2	GO:1903142 positive regulation of establishment of endothelial barrier;GO:0090394 negative regulation of excitatory postsynaptic potential;GO:1901552 positive regulation of endothelial cell development		G-protein coupled receptors/{GPCRs excl olfactory receptors,Lysolipids receptors}			(M155)PID S1P META PATHWAY; (M268)PID S1P S1P2 PATHWAY; (M55)PID S1P S1P3 PATHWAY		0	0	0	0	0	0	0	0	0	0	0	0	0	0	0	0	0	0	0	0
S1PR4	8698	symbol	H. sapiens	8698	H. sapiens	S1PR4	sphingosine-1-phosphate receptor 4	GO:0007202 activation of phospholipase C activity;GO:0010863 positive regulation of phospholipase C activity;GO:0003376 sphingosine-1-phosphate signaling pathway		G-protein coupled receptors/{GPCRs excl olfactory receptors,Lysolipids receptors}			(M64)PID S1P S1P4 PATHWAY; (M155)PID S1P META PATHWAY		0	0	0	0	0	0	0	0	0	0	0	0	0	0	0	0	0	1	0	0
S1PR5	53637	symbol	H. sapiens	53637	H. sapiens	S1PR5	sphingosine-1-phosphate receptor 5	GO:0003376 sphingosine-1-phosphate signaling pathway;GO:0090520 sphingolipid mediated signaling pathway;GO:0045664 regulation of neuron differentiation		G-protein coupled receptors/{GPCRs excl olfactory receptors,Lysolipids receptors}		Fingolimod (Sphingosine-1-phosphate receptor activity)	(M64)PID S1P S1P4 PATHWAY; (M155)PID S1P META PATHWAY		0	0	0	0	0	0	0	0	0	0	0	0	0	0	0	0	0	0	0	0
SAA4	6291	symbol	H. sapiens	6291	H. sapiens	SAA4	serum amyloid A4, constitutive	GO:0006953 acute-phase response;GO:0050918 positive chemotaxis;GO:0002526 acute inflammatory response							0	0	0	0	0	0	0	0	0	1	0	0	0	1	0	0	0	0	0	0
SAP18	10284	symbol	H. sapiens	10284	H. sapiens	SAP18	Sin3A associated protein 18	GO:0048025 negative regulation of mRNA splicing, via spliceosome;GO:0000381 regulation of alternative mRNA splicing, via spliceosome;GO:0050686 negative regulation of mRNA processing		Transporters/Primary Active Transporters	Nucleus but not nucleoli		(M219)PID HEDGEHOG GLI PATHWAY; (M101)PID HDAC CLASSI PATHWAY; (M105)PID TELOMERASE PATHWAY		0	0	0	0	0	0	0	0	0	0	0	0	0	0	0	0	0	0	0	0
SARM1	23098	symbol	H. sapiens	23098	H. sapiens	SARM1	sterile alpha and TIR motif containing 1	GO:0034128 negative regulation of MyD88-independent toll-like receptor signaling pathway;GO:0034127 regulation of MyD88-independent toll-like receptor signaling pathway;GO:0034122 negative regulation of toll-like receptor signaling pathway			Vesicles				0	0	0	0	0	0	0	0	0	0	0	0	0	0	0	0	1	0	0	0
SART1	9092	symbol	H. sapiens	9092	H. sapiens	SART1	squamous cell carcinoma antigen recognized by T-cells 1	GO:0045585 positive regulation of cytotoxic T cell differentiation;GO:0045583 regulation of cytotoxic T cell differentiation;GO:0045065 cytotoxic T cell differentiation			Nucleus but not nucleoli				0	0	0	1	0	1	0	0	0	0	0	0	0	0	0	0	0	0	0	0
SAT2	112483	symbol	H. sapiens	112483	H. sapiens	SAT2	spermidine/spermine N1-acetyltransferase family member 2	GO:0009447 putrescine catabolic process;GO:0032918 spermidine acetylation;GO:0032919 spermine acetylation		Enzymes/ENZYME proteins/Transferases					0	0	0	0	0	0	0	1	0	0	0	0	0	0	0	0	0	0	0	0
SAV1	60485	symbol	H. sapiens	60485	H. sapiens	SAV1	salvador family WW domain containing protein 1	GO:0060044 negative regulation of cardiac muscle cell proliferation;GO:0055022 negative regulation of cardiac muscle tissue growth;GO:0060043 regulation of cardiac muscle cell proliferation			Cytoplasm				0	0	0	0	0	0	0	0	0	0	0	0	0	0	0	0	0	0	0	0
SBSPON	157869	symbol	H. sapiens	157869	H. sapiens	SBSPON	somatomedin B and thrombospondin type 1 domain containing	GO:0006898 receptor-mediated endocytosis;GO:0006897 endocytosis;GO:0006955 immune response					(M3008)NABA ECM GLYCOPROTEINS; (M5884)NABA CORE MATRISOME; (M5889)NABA MATRISOME		0	0	0	0	0	0	0	0	0	0	0	0	0	0	0	0	0	0	0	0
SCAMP4	113178	symbol	H. sapiens	113178	H. sapiens	SCAMP4	secretory carrier membrane protein 4	GO:0015031 protein transport;GO:0045184 establishment of protein localization;GO:0008104 protein localization			Golgi apparatus;Vesicles				0	0	0	0	0	0	0	0	0	0	0	0	0	0	0	0	0	0	0	0
SCGB1A1	7356	symbol	H. sapiens	7356	H. sapiens	SCGB1A1	secretoglobin family 1A member 1	GO:0042130 negative regulation of T cell proliferation;GO:0032696 negative regulation of interleukin-13 production;GO:0050868 negative regulation of T cell activation				4,4'-BIS([H]METHYLSULFONYL)-2,2',5,5'-TETRACHLOROBIPHENYL (Polychlorinated biphenyl binding)	(M285)PID HNF3A PATHWAY	(M5949)HALLMARK PEROXISOME; (M5956)HALLMARK KRAS SIGNALING DN	0	0	0	0	1	1	0	0	0	1	0	0	0	0	0	1	1	0	0	0
SCN4B	6330	symbol	H. sapiens	6330	H. sapiens	SCN4B	sodium voltage-gated channel beta subunit 4	GO:0086016 AV node cell action potential;GO:0086027 AV node cell to bundle of His cell signaling;GO:0086067 AV node cell to bundle of His cell communication		Transporters/Accessory Factors Involved in Transport		Zonisamide (Voltage-gated sodium channel activity involved in cardiac muscle cell action potential)			0	0	0	0	0	0	0	0	0	0	0	0	0	0	0	0	0	0	0	0
SCNN1B	6338	symbol	H. sapiens	6338	H. sapiens	SCNN1B	sodium channel epithelial 1 beta subunit	GO:0055078 sodium ion homeostasis;GO:0050891 multicellular organismal water homeostasis;GO:0035725 sodium ion transmembrane transport		Transporters/Transporter channels and pores		Triamterene (Ww domain binding);Amiloride (Ww domain binding)			0	0	0	0	0	0	0	0	0	0	0	0	1	0	1	0	0	1	0	0
SCNN1G	6340	symbol	H. sapiens	6340	H. sapiens	SCNN1G	sodium channel epithelial 1 gamma subunit	GO:0055078 sodium ion homeostasis;GO:0050891 multicellular organismal water homeostasis;GO:0035725 sodium ion transmembrane transport		Transporters/Transporter channels and pores		Triamterene (Ww domain binding);Amiloride (Ww domain binding)			0	0	0	0	0	0	0	0	0	0	0	0	1	0	1	0	0	1	0	0
SCO1	6341	symbol	H. sapiens	6341	H. sapiens	SCO1	SCO1, cytochrome c oxidase assembly protein	GO:1901799 negative regulation of proteasomal protein catabolic process;GO:0006878 cellular copper ion homeostasis;GO:0033617 mitochondrial respiratory chain complex IV assembly			Nucleus				0	0	0	0	0	0	0	0	0	0	0	0	0	0	0	0	0	1	0	0
SDE2	163859	symbol	H. sapiens	163859	H. sapiens	SDE2	SDE2 telomere maintenance homolog				Nucleus				0	0	0	0	0	0	0	0	0	0	0	0	0	0	0	0	0	0	0	0
SDHAF1	644096	symbol	H. sapiens	644096	H. sapiens	SDHAF1	succinate dehydrogenase complex assembly factor 1	GO:0034553 mitochondrial respiratory chain complex II assembly;GO:0034552 respiratory chain complex II assembly;GO:0097032 mitochondrial respiratory chain complex II biogenesis			Mitochondria				0	0	0	0	0	0	0	0	0	0	0	0	0	0	0	0	0	0	0	0
SDS	10993	symbol	H. sapiens	10993	H. sapiens	SDS	serine dehydratase	GO:0006565 L-serine catabolic process;GO:0042866 pyruvate biosynthetic process;GO:0009071 serine family amino acid catabolic process		Enzymes/ENZYME proteins/Lyases	Cytoplasm	Pyridoxal Phosphate (Pyridoxal phosphate binding);L-Serine (Pyridoxal phosphate binding)			1	1	0	0	0	0	1	1	0	0	0	0	0	0	0	0	0	0	0	0
SEC63	11231	symbol	H. sapiens	11231	H. sapiens	SEC63	SEC63 homolog, protein translocation regulator	GO:0006620 posttranslational protein targeting to membrane;GO:0036498 IRE1-mediated unfolded protein response;GO:0006614 SRP-dependent cotranslational protein targeting to membrane		Transporters/Primary Active Transporters					0	0	0	0	0	0	0	0	0	0	0	0	0	0	0	0	0	0	0	0
SEMA4D	10507	symbol	H. sapiens	10507	H. sapiens	SEMA4D	semaphorin 4D	GO:0048672 positive regulation of collateral sprouting;GO:0048843 negative regulation of axon extension involved in axon guidance;GO:0010693 negative regulation of alkaline phosphatase activity		CD markers	Vesicles		(M5880)NABA ECM AFFILIATED; (M5885)NABA MATRISOME ASSOCIATED; (M5889)NABA MATRISOME	(M5932)HALLMARK INFLAMMATORY RESPONSE	0	0	0	0	0	1	0	0	0	1	0	0	0	0	0	0	0	0	0	0
SEMA5A	9037	symbol	H. sapiens	9037	H. sapiens	SEMA5A	semaphorin 5A	GO:0048842 positive regulation of axon extension involved in axon guidance;GO:0035413 positive regulation of catenin import into nucleus;GO:1902669 positive regulation of axon guidance					(M5880)NABA ECM AFFILIATED; (M5885)NABA MATRISOME ASSOCIATED; (M5889)NABA MATRISOME		0	0	0	0	0	1	0	0	0	1	0	0	0	0	0	0	0	0	0	0
SEPN1	57190	gene_synonym	H. sapiens	57190	H. sapiens	SELENON	selenoprotein N	GO:0060314 regulation of ryanodine-sensitive calcium-release channel activity;GO:0051279 regulation of release of sequestered calcium ion into cytosol;GO:0051209 release of sequestered calcium ion into cytosol			Cytoplasm				0	0	0	0	0	0	0	0	0	0	0	1	0	0	0	0	0	1	0	0
SEPT1	1731	symbol	H. sapiens	1731	H. sapiens	SEPT1	septin 1	GO:0051301 cell division;GO:0007049 cell cycle;GO:0044763 single-organism cellular process					(M14)PID AURORA B PATHWAY		0	0	0	0	0	0	0	0	0	0	0	0	0	0	0	0	0	0	0	0
SERPINA5	5104	symbol	H. sapiens	5104	H. sapiens	SERPINA5	serpin family A member 5	GO:0061107 seminal vesicle development;GO:0007342 fusion of sperm to egg plasma membrane;GO:0045026 plasma membrane fusion			Mitochondria	Urokinase (Serine-type endopeptidase inhibitor activity);Drotrecogin alfa (Serine-type endopeptidase inhibitor activity);T-1249 (Serine-type endopeptidase inhibitor activity)	(M3468)NABA ECM REGULATORS; (M5885)NABA MATRISOME ASSOCIATED; (M5889)NABA MATRISOME	(M5944)HALLMARK ANGIOGENESIS; (M5907)HALLMARK ESTROGEN RESPONSE LATE	0	0	0	0	0	0	0	0	0	0	0	0	1	0	0	0	0	0	0	0
SERPINB5	5268	symbol	H. sapiens	5268	H. sapiens	SERPINB5	serpin family B member 5	GO:0060512 prostate gland morphogenesis;GO:0030850 prostate gland development;GO:0010951 negative regulation of endopeptidase activity			Vesicles	S,S-(2-Hydroxyethyl)Thiocysteine (Serine-type endopeptidase inhibitor activity)	(M256)PID TAP63 PATHWAY; (M166)PID ATF2 PATHWAY; (M145)PID P53 DOWNSTREAM PATHWAY	(M5939)HALLMARK P53 PATHWAY	0	0	0	0	0	0	0	0	0	0	0	0	0	0	0	0	0	0	0	0
SERPIND1	3053	symbol	H. sapiens	3053	H. sapiens	SERPIND1	serpin family D member 1	GO:0008218 bioluminescence;GO:0010951 negative regulation of endopeptidase activity;GO:0010466 negative regulation of peptidase activity				Ardeparin (Serine-type endopeptidase inhibitor activity);Sulodexide (Serine-type endopeptidase inhibitor activity)	(M3468)NABA ECM REGULATORS; (M5885)NABA MATRISOME ASSOCIATED; (M5889)NABA MATRISOME		0	0	0	0	0	0	0	0	0	0	0	0	1	0	0	0	0	0	0	0
SERTM1	400120	symbol	H. sapiens	400120	H. sapiens	SERTM1	serine rich and transmembrane domain containing 1								0	0	0	0	0	0	0	0	0	0	0	0	0	0	0	0	0	0	0	0
SFRP1	6422	symbol	H. sapiens	6422	H. sapiens	SFRP1	secreted frizzled related protein 1	GO:2000041 negative regulation of planar cell polarity pathway involved in axis elongation;GO:2000080 negative regulation of canonical Wnt signaling pathway involved in controlling type B pancreatic cell proliferation;GO:0090179 planar cell polarity pathway involved in neural tube closure			Nucleoli		(M17761)ST WNT BETA CATENIN PATHWAY; (M254)PID MYC REPRESS PATHWAY; (M5493)WNT SIGNALING	(M5930)HALLMARK EPITHELIAL MESENCHYMAL TRANSITION	0	0	0	0	1	1	0	0	0	0	0	0	0	0	0	0	0	0	0	0
SFT2D2	375035	symbol	H. sapiens	375035	H. sapiens	SFT2D2	SFT2 domain containing 2	GO:0015031 protein transport;GO:0016192 vesicle-mediated transport;GO:0045184 establishment of protein localization							0	0	0	0	0	0	0	0	0	0	0	0	0	0	0	0	0	0	0	0
SFT2D3	84826	symbol	H. sapiens	84826	H. sapiens	SFT2D3	SFT2 domain containing 3	GO:0015031 protein transport;GO:0016192 vesicle-mediated transport;GO:0045184 establishment of protein localization							0	0	0	0	0	0	0	0	0	0	0	0	0	0	0	0	0	0	0	0
SFTPD	6441	symbol	H. sapiens	6441	H. sapiens	SFTPD	surfactant protein D	GO:0042130 negative regulation of T cell proliferation;GO:0045085 negative regulation of interleukin-2 biosynthetic process;GO:0050868 negative regulation of T cell activation				Beta-D-Glucose (Carbohydrate binding)	(M285)PID HNF3A PATHWAY; (M279)PID RB 1PATHWAY; (M5880)NABA ECM AFFILIATED		0	0	0	0	0	1	0	0	0	0	0	0	0	0	0	1	1	0	0	0
SFXN2	118980	symbol	H. sapiens	118980	H. sapiens	SFXN2	sideroflexin 2	GO:0055072 iron ion homeostasis;GO:0055076 transition metal ion homeostasis;GO:0055065 metal ion homeostasis			Mitochondria				0	0	0	0	0	0	0	0	0	0	0	0	0	0	0	0	0	1	0	0
SGCB	6443	symbol	H. sapiens	6443	H. sapiens	SGCB	sarcoglycan beta	GO:0097084 vascular smooth muscle cell development;GO:0035886 vascular smooth muscle cell differentiation;GO:0055013 cardiac muscle cell development			Cytoplasm			(M5930)HALLMARK EPITHELIAL MESENCHYMAL TRANSITION	0	0	0	0	0	0	0	0	0	0	0	0	0	0	0	0	0	0	0	0
SGCG	6445	symbol	H. sapiens	6445	H. sapiens	SGCG	sarcoglycan gamma	GO:0048738 cardiac muscle tissue development;GO:0060047 heart contraction;GO:0055001 muscle cell development			Nucleus but not nucleoli			(M5909)HALLMARK MYOGENESIS; (M5930)HALLMARK EPITHELIAL MESENCHYMAL TRANSITION	0	0	0	0	0	0	0	0	0	0	0	0	0	0	0	0	0	0	0	0
SGSH	6448	symbol	H. sapiens	6448	H. sapiens	SGSH	N-sulfoglucosamine sulfohydrolase	GO:0030200 heparan sulfate proteoglycan catabolic process;GO:0030167 proteoglycan catabolic process;GO:0006027 glycosaminoglycan catabolic process		Enzymes/ENZYME proteins/Hydrolases					1	0	1	0	0	0	0	1	0	0	0	0	0	0	0	0	0	0	0	1
SH3BP5L	80851	symbol	H. sapiens	80851	H. sapiens	SH3BP5L	SH3 binding domain protein 5 like	GO:0061099 negative regulation of protein tyrosine kinase activity;GO:0050732 negative regulation of peptidyl-tyrosine phosphorylation;GO:0061097 regulation of protein tyrosine kinase activity			Nucleus but not nucleoli;Golgi apparatus;Vesicles				0	0	0	0	0	0	0	0	0	0	0	0	0	0	0	0	0	0	0	0
SH3GLB2	56904	symbol	H. sapiens	56904	H. sapiens	SH3GLB2	SH3 domain containing GRB2 like endophilin B2	GO:0098609 cell-cell adhesion;GO:0007155 cell adhesion;GO:0022610 biological adhesion			Cytoplasm				0	0	0	0	0	0	0	0	0	0	0	0	0	0	0	0	0	0	0	0
SHISA2	387914	symbol	H. sapiens	387914	H. sapiens	SHISA2	shisa family member 2	GO:0040037 negative regulation of fibroblast growth factor receptor signaling pathway;GO:0040036 regulation of fibroblast growth factor receptor signaling pathway;GO:0008543 fibroblast growth factor receptor signaling pathway			Nucleus but not nucleoli				0	0	0	0	0	0	0	0	0	0	0	0	0	0	0	0	0	0	0	0
SHKBP1	92799	symbol	H. sapiens	92799	H. sapiens	SHKBP1	SH3KBP1 binding protein 1	GO:0045742 positive regulation of epidermal growth factor receptor signaling pathway;GO:1901186 positive regulation of ERBB signaling pathway;GO:0042058 regulation of epidermal growth factor receptor signaling pathway			Cell Junctions				0	0	0	0	0	0	0	0	0	0	0	0	0	0	0	0	0	0	0	0
SHMT1	6470	symbol	H. sapiens	6470	H. sapiens	SHMT1	serine hydroxymethyltransferase 1	GO:0019264 glycine biosynthetic process from serine;GO:0006231 dTMP biosynthetic process;GO:0006565 L-serine catabolic process		Enzymes/ENZYME proteins/Transferases	Nucleus;Cytoplasm	Pyridoxal Phosphate (Serine binding);Tetrahydrofolic acid (Serine binding);Glycine (Serine binding);Mimosine (Serine binding);Triglu-5-Formyl-Tetrahydrofolate (Serine binding);5-Hydroxymethylene-6-Hydrofolic Acid (Serine binding);N-Pyridoxyl-Glycine-5-Monophosphate (Serine binding)	(M66)PID MYC ACTIV PATHWAY	(M5925)HALLMARK E2F TARGETS	1	1	0	0	0	0	0	1	0	0	0	0	0	0	0	0	0	0	1	1
SIX5	147912	symbol	H. sapiens	147912	H. sapiens	SIX5	SIX homeobox 5	GO:1902723 negative regulation of skeletal muscle satellite cell proliferation;GO:0014859 negative regulation of skeletal muscle cell proliferation;GO:0014842 regulation of skeletal muscle satellite cell proliferation		Transcription factors/Helix-turn-helix domains	Nucleus but not nucleoli;Cytoplasm;Golgi apparatus;Vesicles				0	0	0	0	0	0	0	0	0	0	0	0	0	0	0	0	0	0	0	0
SKA2	348235	symbol	H. sapiens	348235	H. sapiens	SKA2	spindle and kinetochore associated complex subunit 2	GO:0031110 regulation of microtubule polymerization or depolymerization;GO:0007062 sister chromatid cohesion;GO:0031109 microtubule polymerization or depolymerization							0	0	0	0	0	0	0	0	0	0	0	0	0	0	0	0	0	0	0	0
SLAMF1	6504	symbol	H. sapiens	6504	H. sapiens	SLAMF1	signaling lymphocytic activation molecule family member 1	GO:0042104 positive regulation of activated T cell proliferation;GO:0035744 T-helper 1 cell cytokine production;GO:0046006 regulation of activated T cell proliferation		CD markers				(M5932)HALLMARK INFLAMMATORY RESPONSE	0	0	0	0	0	1	0	0	0	1	0	0	0	0	0	1	1	0	0	0
SLAMF8	56833	symbol	H. sapiens	56833	H. sapiens	SLAMF8	SLAM family member 8			CD markers					0	0	0	0	0	0	0	0	0	0	0	0	0	0	0	0	0	0	0	0
SLAMF9	89886	symbol	H. sapiens	89886	H. sapiens	SLAMF9	SLAM family member 9								0	0	0	0	0	0	0	0	0	0	0	0	0	0	0	0	0	0	0	0
SLC11A1	6556	symbol	H. sapiens	6556	H. sapiens	SLC11A1	solute carrier family 11 member 1	GO:0002309 T cell proliferation involved in immune response;GO:0006876 cellular cadmium ion homeostasis;GO:0043091 L-arginine import		Transporters/Electrochemical Potential-driven transporters			(M254)PID MYC REPRESS PATHWAY		0	0	1	0	1	1	0	0	1	1	0	0	0	0	1	1	1	1	0	0
SLC13A3	64849	symbol	H. sapiens	64849	H. sapiens	SLC13A3	solute carrier family 13 member 3	GO:0071422 succinate transmembrane transport;GO:0015744 succinate transport;GO:0015746 citrate transport		Transporters/Electrochemical Potential-driven transporters		Succinic acid (Succinate transmembrane transporter activity)			0	0	0	0	0	0	0	0	0	0	0	0	0	0	1	0	0	0	0	0
SLC15A4	121260	symbol	H. sapiens	121260	H. sapiens	SLC15A4	solute carrier family 15 member 4	GO:0006857 oligopeptide transport;GO:0015992 proton transport;GO:0015833 peptide transport		Transporters/Electrochemical Potential-driven transporters	Nucleus but not nucleoli				0	0	0	0	0	0	0	0	1	0	0	0	0	0	1	0	0	0	0	0
SLC17A9	63910	symbol	H. sapiens	63910	H. sapiens	SLC17A9	solute carrier family 17 member 9	GO:1903955 positive regulation of protein targeting to mitochondrion;GO:1903146 regulation of mitophagy;GO:1903214 regulation of protein targeting to mitochondrion		Transporters/Electrochemical Potential-driven transporters	Nucleus but not nucleoli				0	0	0	0	0	0	0	0	0	0	0	0	0	0	0	0	0	0	0	0
SLC22A15	55356	symbol	H. sapiens	55356	H. sapiens	SLC22A15	solute carrier family 22 member 15	GO:0055085 transmembrane transport;GO:0006811 ion transport;GO:0006810 transport		Transporters/Electrochemical Potential-driven transporters	Vesicles				0	0	0	0	0	0	0	0	0	0	0	0	0	0	1	0	0	0	0	0
SLC25A15	10166	symbol	H. sapiens	10166	H. sapiens	SLC25A15	solute carrier family 25 member 15	GO:0000066 mitochondrial ornithine transport;GO:1903352 L-ornithine transmembrane transport;GO:0015822 ornithine transport		Transporters/Electrochemical Potential-driven transporters		L-Ornithine (L-ornithine transmembrane transporter activity)			0	1	0	0	0	0	0	0	0	0	0	0	0	0	0	0	0	0	0	0
SLC25A38	54977	symbol	H. sapiens	54977	H. sapiens	SLC25A38	solute carrier family 25 member 38	GO:0006783 heme biosynthetic process;GO:0042168 heme metabolic process;GO:0006779 porphyrin-containing compound biosynthetic process		Transporters/Electrochemical Potential-driven transporters				(M5945)HALLMARK HEME METABOLISM	0	0	0	0	0	0	0	0	0	0	0	0	0	0	0	0	0	0	0	0
SLC25A45	283130	symbol	H. sapiens	283130	H. sapiens	SLC25A45	solute carrier family 25 member 45	GO:0055085 transmembrane transport;GO:0006810 transport;GO:0051234 establishment of localization		Transporters/Electrochemical Potential-driven transporters	Nucleus but not nucleoli				0	0	0	0	0	0	0	0	0	0	0	0	0	0	0	0	0	0	0	0
SLC25A47	283600	symbol	H. sapiens	283600	H. sapiens	SLC25A47	solute carrier family 25 member 47	GO:0055085 transmembrane transport;GO:0006810 transport;GO:0051234 establishment of localization		Transporters/Electrochemical Potential-driven transporters					0	0	0	0	0	0	0	0	0	0	0	0	0	0	0	0	0	0	0	0
SLC25A51	92014	symbol	H. sapiens	92014	H. sapiens	SLC25A51	solute carrier family 25 member 51	GO:0006810 transport;GO:0051234 establishment of localization;GO:0051179 localization		Transporters/Electrochemical Potential-driven transporters					0	0	0	0	0	0	0	0	0	0	0	0	0	0	0	0	0	0	0	0
SLC27A1	376497	symbol	H. sapiens	376497	H. sapiens	SLC27A1	solute carrier family 27 member 1	GO:0001579 medium-chain fatty acid transport;GO:0031652 positive regulation of heat generation;GO:0032049 cardiolipin biosynthetic process		Transporters				(M5905)HALLMARK ADIPOGENESIS	0	1	0	0	1	0	0	0	0	0	0	0	0	0	1	0	0	0	1	0
SLC28A1	9154	symbol	H. sapiens	9154	H. sapiens	SLC28A1	solute carrier family 28 member 1	GO:1904823 purine nucleobase transmembrane transport;GO:0015855 pyrimidine nucleobase transport;GO:1901642 nucleoside transmembrane transport		Transporters/Electrochemical Potential-driven transporters					0	0	0	0	0	0	0	0	0	0	0	0	0	0	1	0	0	0	0	0
SLC2A10	81031	symbol	H. sapiens	81031	H. sapiens	SLC2A10	solute carrier family 2 member 10	GO:1904659 glucose transmembrane transport;GO:0035428 hexose transmembrane transport;GO:0046323 glucose import		Transporters/Electrochemical Potential-driven transporters	Cytoplasm				0	0	0	0	0	0	0	0	0	0	0	0	0	0	1	0	0	0	0	0
SLC2A12	154091	symbol	H. sapiens	154091	H. sapiens	SLC2A12	solute carrier family 2 member 12	GO:1904659 glucose transmembrane transport;GO:0035428 hexose transmembrane transport;GO:0046323 glucose import		Transporters/Electrochemical Potential-driven transporters					0	0	0	0	0	0	0	0	0	0	0	0	0	0	1	0	0	0	0	0
SLC2A3	6515	symbol	H. sapiens	6515	H. sapiens	SLC2A3	solute carrier family 2 member 3	GO:0070837 dehydroascorbic acid transport;GO:1904659 glucose transmembrane transport;GO:0019852 L-ascorbic acid metabolic process		Transporters/Electrochemical Potential-driven transporters	Plasma membrane			(M5924)HALLMARK MTORC1 SIGNALING; (M5947)HALLMARK IL2 STAT5 SIGNALING; (M5891)HALLMARK HYPOXIA	0	1	0	0	0	0	1	0	1	0	0	0	0	0	1	0	0	0	0	0
SLC2A4	6517	symbol	H. sapiens	6517	H. sapiens	SLC2A4	solute carrier family 2 member 4	GO:0010021 amylopectin biosynthetic process;GO:1904659 glucose transmembrane transport;GO:2000896 amylopectin metabolic process		Transporters/Electrochemical Potential-driven transporters			(M247)PID INSULIN GLUCOSE PATHWAY; (M249)PID PI3KCI AKT PATHWAY; (M67)PID ARF6 TRAFFICKING PATHWAY	(M5916)HALLMARK APICAL SURFACE	0	0	0	0	1	0	1	0	0	0	0	0	0	0	1	0	0	0	0	1
SLC2A5	6518	symbol	H. sapiens	6518	H. sapiens	SLC2A5	solute carrier family 2 member 5	GO:1990539 fructose import across plasma membrane;GO:0032445 fructose import;GO:0071332 cellular response to fructose stimulus						(M5951)HALLMARK SPERMATOGENESIS; (M5891)HALLMARK HYPOXIA	0	0	0	0	0	0	1	0	1	0	0	0	0	0	1	0	0	0	0	0
SLC2A8	29988	symbol	H. sapiens	29988	H. sapiens	SLC2A8	solute carrier family 2 member 8	GO:1904659 glucose transmembrane transport;GO:0007141 male meiosis I;GO:0035428 hexose transmembrane transport		Transporters/Electrochemical Potential-driven transporters				(M5907)HALLMARK ESTROGEN RESPONSE LATE	0	0	0	0	0	0	1	0	0	0	0	0	0	0	1	0	0	0	0	0
SLC35A5	55032	symbol	H. sapiens	55032	H. sapiens	SLC35A5	solute carrier family 35 member A5	GO:0015992 proton transport;GO:0008643 carbohydrate transport;GO:0006818 hydrogen transport		Transporters/Electrochemical Potential-driven transporters	Golgi apparatus				0	0	0	0	0	0	0	0	0	0	0	0	0	0	0	0	0	0	0	0
SLC35B4	84912	symbol	H. sapiens	84912	H. sapiens	SLC35B4	solute carrier family 35 member B4	GO:1990569 UDP-N-acetylglucosamine transmembrane transport;GO:0015783 GDP-fucose transport;GO:0015790 UDP-xylose transport							0	1	0	0	0	0	1	0	0	0	0	0	0	0	1	0	0	0	0	0
SLC35E1	79939	symbol	H. sapiens	79939	H. sapiens	SLC35E1	solute carrier family 35 member E1	GO:0034219 carbohydrate transmembrane transport;GO:0008643 carbohydrate transport;GO:0055085 transmembrane transport		Transporters/Electrochemical Potential-driven transporters	Golgi apparatus				0	0	0	0	0	0	0	0	0	0	0	0	0	0	1	0	0	0	0	0
SLC36A2	153201	symbol	H. sapiens	153201	H. sapiens	SLC36A2	solute carrier family 36 member 2	GO:0015808 L-alanine transport;GO:0035524 proline transmembrane transport;GO:0032328 alanine transport		Transporters/Electrochemical Potential-driven transporters					0	0	0	0	0	0	0	0	0	0	0	0	0	0	1	0	0	0	0	0
SLC39A4	55630	symbol	H. sapiens	55630	H. sapiens	SLC39A4	solute carrier family 39 member 4	GO:0034224 cellular response to zinc ion starvation;GO:0071578 zinc II ion transmembrane import;GO:0006882 cellular zinc ion homeostasis							0	0	0	0	0	0	0	0	0	0	0	0	0	0	1	0	0	1	0	0
SLC3A1	6519	symbol	H. sapiens	6519	H. sapiens	SLC3A1	solute carrier family 3 member 1	GO:0015811 L-cystine transport;GO:1990822 basic amino acid transmembrane transport;GO:0000101 sulfur amino acid transport		Transporters/Accessory Factors Involved in Transport		L-Cystine (L-cystine transmembrane transporter activity)			0	1	0	0	0	0	1	0	0	0	0	0	0	0	1	0	0	0	0	0
SLC41A2	84102	symbol	H. sapiens	84102	H. sapiens	SLC41A2	solute carrier family 41 member 2	GO:1903830 magnesium ion transmembrane transport;GO:0070838 divalent metal ion transport;GO:0072511 divalent inorganic cation transport		Transporters/Transporter channels and pores					0	0	0	0	0	0	0	0	0	0	0	0	0	0	1	0	0	0	0	0
SLC46A2	57864	symbol	H. sapiens	57864	H. sapiens	SLC46A2	solute carrier family 46 member 2	GO:0070233 negative regulation of T cell apoptotic process;GO:0045580 regulation of T cell differentiation;GO:0070229 negative regulation of lymphocyte apoptotic process		Transporters/Electrochemical Potential-driven transporters					0	0	0	0	0	1	0	0	0	0	0	0	0	0	0	0	0	0	0	0
SLC46A3	283537	symbol	H. sapiens	283537	H. sapiens	SLC46A3	solute carrier family 46 member 3	GO:0055085 transmembrane transport;GO:0006810 transport;GO:0051234 establishment of localization		Transporters/Electrochemical Potential-driven transporters	Plasma membrane;Cytoplasm			(M5934)HALLMARK XENOBIOTIC METABOLISM	0	0	0	0	0	0	0	0	0	0	0	0	0	0	0	0	0	0	0	0
SLC47A1	55244	symbol	H. sapiens	55244	H. sapiens	SLC47A1	solute carrier family 47 member 1	GO:0046618 drug export;GO:0006855 drug transmembrane transport;GO:0015695 organic cation transport		Transporters/Electrochemical Potential-driven transporters					0	0	0	0	0	0	0	0	0	0	0	0	0	0	1	0	0	0	0	0
SLC48A1	55652	symbol	H. sapiens	55652	H. sapiens	SLC48A1	solute carrier family 48 member 1	GO:0015886 heme transport;GO:1901678 iron coordination entity transport;GO:0051181 cofactor transport		Transporters/Electrochemical Potential-driven transporters					0	0	0	0	0	0	0	0	0	0	0	0	0	0	0	0	0	0	0	0
SLC4A1	6521	symbol	H. sapiens	6521	H. sapiens	SLC4A1	solute carrier family 4 member 1 (Diego blood group)	GO:0051453 regulation of intracellular pH;GO:0030641 regulation of cellular pH;GO:0015701 bicarbonate transport		Blood group antigen proteins;CD markers;Transporters/Electrochemical Potential-driven transporters				(M5945)HALLMARK HEME METABOLISM	0	0	0	0	0	0	0	0	0	0	0	0	0	0	1	0	0	1	0	0
SLC52A2	79581	symbol	H. sapiens	79581	H. sapiens	SLC52A2	solute carrier family 52 member 2	GO:0032218 riboflavin transport;GO:0046718 viral entry into host cell;GO:0030260 entry into host cell		Transporters/Electrochemical Potential-driven transporters		Gamma Hydroxybutyric Acid (Virus receptor activity)			0	0	0	0	0	0	0	0	0	0	0	0	0	0	0	0	0	0	0	0
SLC52A3	113278	symbol	H. sapiens	113278	H. sapiens	SLC52A3	solute carrier family 52 member 3	GO:0032218 riboflavin transport;GO:0006771 riboflavin metabolic process;GO:0042726 flavin-containing compound metabolic process		Transporters/Electrochemical Potential-driven transporters					0	0	0	0	0	0	0	0	0	0	0	0	0	0	0	0	0	0	0	0
SLC5A12	159963	symbol	H. sapiens	159963	H. sapiens	SLC5A12	solute carrier family 5 member 12	GO:0035873 lactate transmembrane transport;GO:0015727 lactate transport;GO:1905039 carboxylic acid transmembrane transport		Transporters/Electrochemical Potential-driven transporters					0	0	0	0	0	0	0	0	0	0	0	0	0	0	1	0	0	0	0	0
SLC5A5	6528	symbol	H. sapiens	6528	H. sapiens	SLC5A5	solute carrier family 5 member 5	GO:0015705 iodide transport;GO:0006590 thyroid hormone generation;GO:0071371 cellular response to gonadotropin stimulus		Transporters/Electrochemical Potential-driven transporters				(M5956)HALLMARK KRAS SIGNALING DN	0	0	0	0	0	0	0	0	0	0	0	0	0	0	1	0	0	0	0	0
SLC6A11	6538	symbol	H. sapiens	6538	H. sapiens	SLC6A11	solute carrier family 6 member 11	GO:0015812 gamma-aminobutyric acid transport;GO:0015718 monocarboxylic acid transport;GO:0006865 amino acid transport		Transporters/Electrochemical Potential-driven transporters		Guvacine (Neurotransmitter:sodium symporter activity)			0	0	0	0	0	0	0	0	0	0	0	0	0	0	1	0	0	0	0	0
SLC6A12	6539	symbol	H. sapiens	6539	H. sapiens	SLC6A12	solute carrier family 6 member 12	GO:0015812 gamma-aminobutyric acid transport;GO:0003333 amino acid transmembrane transport;GO:1905039 carboxylic acid transmembrane transport		Transporters/Electrochemical Potential-driven transporters		Guvacine (Neurotransmitter:sodium symporter activity)		(M5941)HALLMARK UV RESPONSE UP; (M5934)HALLMARK XENOBIOTIC METABOLISM	0	0	0	0	0	0	0	0	0	0	0	0	0	0	1	0	0	0	0	0
SLC7A14	57709	symbol	H. sapiens	57709	H. sapiens	SLC7A14	solute carrier family 7 member 14	GO:1902475 L-alpha-amino acid transmembrane transport;GO:0015807 L-amino acid transport;GO:0010923 negative regulation of phosphatase activity		Transporters/Electrochemical Potential-driven transporters					0	0	0	0	0	0	0	0	0	0	0	0	0	0	0	0	0	0	0	0
SLC7A8	23428	symbol	H. sapiens	23428	H. sapiens	SLC7A8	solute carrier family 7 member 8	GO:1902475 L-alpha-amino acid transmembrane transport;GO:0015804 neutral amino acid transport;GO:0015807 L-amino acid transport		Transporters/Electrochemical Potential-driven transporters		L-Phenylalanine (Toxin transporter activity);L-Alanine (Toxin transporter activity)			0	1	0	0	0	0	0	0	0	0	0	0	0	0	1	0	0	1	0	0
SLCO2B1	11309	symbol	H. sapiens	11309	H. sapiens	SLCO2B1	solute carrier organic anion transporter family member 2B1	GO:0015721 bile acid and bile salt transport;GO:0043252 sodium-independent organic anion transport;GO:0015718 monocarboxylic acid transport		Transporters/Electrochemical Potential-driven transporters		Rifampicin (Sodium-independent organic anion transmembrane transporter activity);Ergoloid mesylate (Sodium-independent organic anion transmembrane transporter activity)			0	0	0	0	0	0	0	0	0	0	0	0	0	0	1	0	0	0	0	0
SMAD3	4088	symbol	H. sapiens	4088	H. sapiens	SMAD3	SMAD family member 3	GO:0019049 evasion or tolerance of host defenses by virus;GO:1903243 negative regulation of cardiac muscle hypertrophy in response to stress;GO:0044415 evasion or tolerance of host defenses		Transcription factors	Nucleus but not nucleoli		(M228)PID SMAD2 3PATHWAY; (M286)PID TGFBR PATHWAY; (M254)PID MYC REPRESS PATHWAY	(M5896)HALLMARK TGF BETA SIGNALING; (M5942)HALLMARK UV RESPONSE DN; (M5901)HALLMARK G2M CHECKPOINT	0	0	0	1	0	1	0	0	0	1	0	0	0	0	0	1	1	1	0	0
SMARCD3	6604	symbol	H. sapiens	6604	H. sapiens	SMARCD3	SWI/SNF related, matrix associated, actin dependent regulator of chromatin, subfamily d, member 3	GO:0003219 cardiac right ventricle formation;GO:0003139 secondary heart field specification;GO:0003211 cardiac ventricle formation			Nucleus but not nucleoli		(M87)PID LKB1 PATHWAY; (M256)PID TAP63 PATHWAY		0	1	0	0	0	0	0	0	0	0	0	0	0	0	0	0	0	0	0	0
SMOC2	64094	symbol	H. sapiens	64094	H. sapiens	SMOC2	SPARC related modular calcium binding 2	GO:0010811 positive regulation of cell-substrate adhesion;GO:0010810 regulation of cell-substrate adhesion;GO:0045785 positive regulation of cell adhesion					(M3008)NABA ECM GLYCOPROTEINS; (M5884)NABA CORE MATRISOME; (M5889)NABA MATRISOME		0	0	0	0	0	1	0	0	0	0	0	0	0	0	0	0	0	0	0	0
SMU1	55234	symbol	H. sapiens	55234	H. sapiens	SMU1	DNA replication regulator and spliceosomal factor				Vesicles				0	0	0	0	0	0	0	0	0	0	0	0	0	0	0	0	0	0	0	0
SMYD1	150572	symbol	H. sapiens	150572	H. sapiens	SMYD1	SET and MYND domain containing 1	GO:0010831 positive regulation of myotube differentiation;GO:0045663 positive regulation of myoblast differentiation;GO:0010830 regulation of myotube differentiation		Enzymes/ENZYME proteins/Transferases					0	0	0	0	0	0	0	0	0	0	0	0	0	0	0	0	0	0	0	0
SMYD4	114826	symbol	H. sapiens	114826	H. sapiens	SMYD4	SET and MYND domain containing 4	GO:0032259 methylation;GO:0008152 metabolic process;GO:0008150 biological_process			Golgi apparatus;Vesicles				0	0	0	0	0	0	0	0	0	0	0	0	0	0	0	0	0	0	0	0
SNAPC1	6617	symbol	H. sapiens	6617	H. sapiens	SNAPC1	small nuclear RNA activating complex polypeptide 1	GO:0042796 snRNA transcription from RNA polymerase III promoter;GO:0042795 snRNA transcription from RNA polymerase II promoter;GO:0009301 snRNA transcription			Nucleus				0	0	0	1	0	0	0	0	0	0	1	0	0	0	0	0	0	0	0	0
SNTN	132203	symbol	H. sapiens	132203	H. sapiens	SNTN	sentan, cilia apical structure protein								0	0	0	0	0	0	0	0	0	0	0	0	0	0	0	0	0	0	0	0
SNX20	124460	symbol	H. sapiens	124460	H. sapiens	SNX20	sorting nexin 20	GO:0015031 protein transport;GO:0045184 establishment of protein localization;GO:0008104 protein localization			Nucleus but not nucleoli				0	0	0	0	0	0	0	0	0	0	0	0	0	0	0	0	0	0	0	0
SNX8	29886	symbol	H. sapiens	29886	H. sapiens	SNX8	sorting nexin 8	GO:0034498 early endosome to Golgi transport;GO:0042147 retrograde transport, endosome to Golgi;GO:0016482 cytosolic transport			Vesicles				0	0	0	0	0	0	0	0	0	0	0	0	0	0	0	0	0	0	0	0
SOD3	6649	symbol	H. sapiens	6649	H. sapiens	SOD3	superoxide dismutase 3, extracellular	GO:0019430 removal of superoxide radicals;GO:0071451 cellular response to superoxide;GO:0071450 cellular response to oxygen radical		Enzymes/ENZYME proteins/Oxidoreductases				(M5909)HALLMARK MYOGENESIS	0	0	0	0	0	0	0	0	0	0	0	1	0	0	0	0	0	0	0	0
SOWAHD	347454	symbol	H. sapiens	347454	H. sapiens	SOWAHD	sosondowah ankyrin repeat domain family member D								0	0	0	0	0	0	0	0	0	0	0	0	0	0	0	0	0	0	0	0
SOX18	54345	symbol	H. sapiens	54345	H. sapiens	SOX18	SRY-box 18	GO:0060214 endocardium formation;GO:0060956 endocardial cell differentiation;GO:0060836 lymphatic endothelial cell differentiation		Transcription factors/Other all-alpha-helical DNA-binding domains					0	0	0	0	0	0	0	0	0	0	0	0	0	0	0	0	0	0	0	0
SPCS2	9789	symbol	H. sapiens	9789	H. sapiens	SPCS2	signal peptidase complex subunit 2	GO:0045047 protein targeting to ER;GO:0006465 signal peptide processing;GO:0072599 establishment of protein localization to endoplasmic reticulum			Nucleus				0	0	0	0	0	0	0	0	0	0	0	0	0	0	0	0	0	0	0	0
SPECC1L	23384	symbol	H. sapiens	23384	H. sapiens	SPECC1L	sperm antigen with calponin homology and coiled-coil domains 1 like	GO:0000226 microtubule cytoskeleton organization;GO:0030036 actin cytoskeleton organization;GO:0051301 cell division			Cytoskeleton (Actin filaments)				0	0	0	0	0	0	0	0	0	0	0	0	0	0	0	0	0	0	0	0
SPIB	6689	symbol	H. sapiens	6689	H. sapiens	SPIB	Spi-B transcription factor	GO:0006357 regulation of transcription from RNA polymerase II promoter;GO:0006366 transcription from RNA polymerase II promoter;GO:0006355 regulation of transcription, DNA-templated		Transcription factors/Helix-turn-helix domains					0	0	0	0	0	0	0	0	0	0	0	0	0	0	0	0	0	0	0	0
SPIC	121599	symbol	H. sapiens	121599	H. sapiens	SPIC	Spi-C transcription factor	GO:0001824 blastocyst development;GO:0001701 in utero embryonic development;GO:0045944 positive regulation of transcription from RNA polymerase II promoter		Transcription factors/Helix-turn-helix domains					0	0	0	0	0	0	0	0	0	0	0	0	0	0	0	0	0	0	0	0
SPICE1	152185	symbol	H. sapiens	152185	H. sapiens	SPICE1	spindle and centriole associated protein 1	GO:0046599 regulation of centriole replication;GO:0007099 centriole replication;GO:0010824 regulation of centrosome duplication			Centrosome				0	0	0	0	0	0	0	0	0	0	0	0	0	0	0	0	0	0	0	0
SPON1	10418	symbol	H. sapiens	10418	H. sapiens	SPON1	spondin 1	GO:0036066 protein O-linked fucosylation;GO:0036065 fucosylation;GO:0006493 protein O-linked glycosylation					(M3008)NABA ECM GLYCOPROTEINS; (M5884)NABA CORE MATRISOME; (M5889)NABA MATRISOME	(M5953)HALLMARK KRAS SIGNALING UP	0	0	0	0	0	0	0	0	0	0	0	0	0	0	0	0	0	0	0	1
SPR	6697	symbol	H. sapiens	6697	H. sapiens	SPR	sepiapterin reductase (7,8-dihydrobiopterin:NADP+ oxidoreductase)	GO:0006729 tetrahydrobiopterin biosynthetic process;GO:0046146 tetrahydrobiopterin metabolic process;GO:0050999 regulation of nitric-oxide synthase activity		Enzymes/ENZYME proteins/Oxidoreductases	Nucleus but not nucleoli;Cytoplasm	Oxaloacetate Ion (Sepiapterin reductase activity);2'-Monophosphoadenosine 5'-Diphosphoribose (Sepiapterin reductase activity);Biopterin (Sepiapterin reductase activity);N-Acetyl Serotonin (Sepiapterin reductase activity)		(M5941)HALLMARK UV RESPONSE UP	0	0	0	0	0	0	0	0	0	0	0	1	0	0	0	0	0	0	0	0
SPRN	503542	symbol	H. sapiens	503542	H. sapiens	SPRN	shadow of prion protein homolog (zebrafish)	GO:0006606 protein import into nucleus;GO:1902593 single-organism nuclear import;GO:0044744 protein targeting to nucleus							0	0	0	0	0	0	0	0	0	0	0	0	0	0	0	0	0	0	0	0
SPSB3	90864	symbol	H. sapiens	90864	H. sapiens	SPSB3	splA/ryanodine receptor domain and SOCS box containing 3	GO:0016567 protein ubiquitination;GO:0032446 protein modification by small protein conjugation;GO:0070647 protein modification by small protein conjugation or removal			Mitochondria				0	0	0	0	0	0	0	0	0	0	0	0	0	0	0	0	0	0	0	0
SPSB4	92369	symbol	H. sapiens	92369	H. sapiens	SPSB4	splA/ryanodine receptor domain and SOCS box containing 4	GO:0016567 protein ubiquitination;GO:0032446 protein modification by small protein conjugation;GO:0070647 protein modification by small protein conjugation or removal							0	0	0	0	0	0	0	0	0	0	0	0	0	0	0	0	0	0	0	0
SPTA1	6708	symbol	H. sapiens	6708	H. sapiens	SPTA1	spectrin alpha, erythrocytic 1	GO:0051693 actin filament capping;GO:0042102 positive regulation of T cell proliferation;GO:0030835 negative regulation of actin filament depolymerization						(M5945)HALLMARK HEME METABOLISM	0	0	0	0	0	1	0	0	0	0	0	0	0	0	0	0	0	0	0	0
SPTLC2	9517	symbol	H. sapiens	9517	H. sapiens	SPTLC2	serine palmitoyltransferase long chain base subunit 2	GO:0046511 sphinganine biosynthetic process;GO:1904504 positive regulation of lipophagy;GO:0046512 sphingosine biosynthetic process		Enzymes/ENZYME proteins/Transferases	Mitochondria	Pyridoxal Phosphate (Serine c-palmitoyltransferase activity);L-Serine (Serine c-palmitoyltransferase activity)			1	1	0	0	0	0	0	0	0	0	0	0	0	0	0	0	0	0	1	0
SRP72	6731	symbol	H. sapiens	6731	H. sapiens	SRP72	signal recognition particle 72	GO:0006616 SRP-dependent cotranslational protein targeting to membrane, translocation;GO:0006614 SRP-dependent cotranslational protein targeting to membrane;GO:0006613 cotranslational protein targeting to membrane		Transporters/Primary Active Transporters	Nucleoli;Plasma membrane;Cytoplasm				0	0	0	0	0	0	0	0	0	0	0	0	0	0	0	0	0	0	0	0
SRPRB	58477	symbol	H. sapiens	58477	H. sapiens	SRPRB	SRP receptor beta subunit	GO:0036498 IRE1-mediated unfolded protein response;GO:0006614 SRP-dependent cotranslational protein targeting to membrane;GO:0006613 cotranslational protein targeting to membrane			Plasma membrane			(M5957)HALLMARK PANCREAS BETA CELLS; (M5922)HALLMARK UNFOLDED PROTEIN RESPONSE	0	0	0	0	0	0	0	0	0	0	0	0	0	0	0	0	0	0	0	0
SRSF12	135295	symbol	H. sapiens	135295	H. sapiens	SRSF12	serine and arginine rich splicing factor 12	GO:0000395 mRNA 5'-splice site recognition;GO:0000244 spliceosomal tri-snRNP complex assembly;GO:0048025 negative regulation of mRNA splicing, via spliceosome							0	0	0	1	0	0	0	0	0	0	0	0	0	0	0	0	0	0	0	0
SSPN	8082	symbol	H. sapiens	8082	H. sapiens	SSPN	sarcospan	GO:0006936 muscle contraction;GO:0003012 muscle system process;GO:0007155 cell adhesion						(M5910)HALLMARK PROTEIN SECRETION; (M5913)HALLMARK INTERFERON GAMMA RESPONSE; (M5909)HALLMARK MYOGENESIS	0	0	0	0	0	0	0	0	0	0	0	0	0	0	0	0	0	0	0	0
SSPO	23145	symbol	H. sapiens	23145	H. sapiens	SSPO	SCO-spondin	GO:0010466 negative regulation of peptidase activity;GO:0045861 negative regulation of proteolysis;GO:0051346 negative regulation of hydrolase activity					(M26)PID NFKAPPAB ATYPICAL PATHWAY; (M31)PID BETA CATENIN DEG PATHWAY; (M37)PID NFKAPPAB CANONICAL PATHWAY		0	0	0	0	0	0	0	0	0	0	0	0	0	0	0	0	0	0	0	0
SSTR1	6751	symbol	H. sapiens	6751	H. sapiens	SSTR1	somatostatin receptor 1	GO:0038170 somatostatin signaling pathway;GO:0038169 somatostatin receptor signaling pathway;GO:0071392 cellular response to estradiol stimulus		G-protein coupled receptors/GPCRs excl olfactory receptors		Octreotide (Somatostatin receptor activity);Pasireotide (Somatostatin receptor activity)			0	0	0	0	0	0	0	0	0	0	0	0	0	0	0	0	0	0	0	0
ST6GAL2	84620	symbol	H. sapiens	84620	H. sapiens	ST6GAL2	ST6 beta-galactoside alpha-2,6-sialyltransferase 2	GO:0018279 protein N-linked glycosylation via asparagine;GO:0097503 sialylation;GO:0018196 peptidyl-asparagine modification		Enzymes/ENZYME proteins/Transferases					0	0	0	0	0	0	1	0	0	0	0	0	0	0	0	0	0	0	0	1
ST6GALNAC1	55808	symbol	H. sapiens	55808	H. sapiens	ST6GALNAC1	ST6 N-acetylgalactosaminide alpha-2,6-sialyltransferase 1	GO:0001574 ganglioside biosynthetic process;GO:0001573 ganglioside metabolic process;GO:0006688 glycosphingolipid biosynthetic process		Enzymes/ENZYME proteins/Transferases					0	1	0	0	0	0	1	0	0	0	0	0	0	0	0	0	0	0	0	1
ST6GALNAC2	10610	symbol	H. sapiens	10610	H. sapiens	ST6GALNAC2	ST6 N-acetylgalactosaminide alpha-2,6-sialyltransferase 2	GO:0001574 ganglioside biosynthetic process;GO:0016266 O-glycan processing;GO:0001573 ganglioside metabolic process						(M5907)HALLMARK ESTROGEN RESPONSE LATE	0	1	0	0	0	0	1	0	0	0	0	0	0	0	0	0	0	0	0	1
STAB2	55576	symbol	H. sapiens	55576	H. sapiens	STAB2	stabilin 2	GO:0030214 hyaluronan catabolic process;GO:0030212 hyaluronan metabolic process;GO:0006027 glycosaminoglycan catabolic process			Cytoplasm	Hyaluronic acid (Scavenger receptor activity)			0	0	0	0	0	0	0	1	0	1	0	1	1	0	0	0	1	0	0	0
STAR	6770	symbol	H. sapiens	6770	H. sapiens	STAR	steroidogenic acute regulatory protein	GO:0070859 positive regulation of bile acid biosynthetic process;GO:0042747 circadian sleep/wake cycle, REM sleep;GO:1904253 positive regulation of bile acid metabolic process							0	1	0	0	1	0	0	0	0	0	0	0	0	0	0	0	1	1	0	0
STARD4	134429	symbol	H. sapiens	134429	H. sapiens	STARD4	StAR related lipid transfer domain containing 4	GO:0070859 positive regulation of bile acid biosynthetic process;GO:0010879 cholesterol transport involved in cholesterol storage;GO:0010873 positive regulation of cholesterol esterification						(M5892)HALLMARK CHOLESTEROL HOMEOSTASIS; (M5924)HALLMARK MTORC1 SIGNALING	0	1	0	0	0	0	0	0	0	0	0	0	0	0	0	0	0	0	0	0
STARD5	80765	symbol	H. sapiens	80765	H. sapiens	STARD5	StAR related lipid transfer domain containing 5	GO:0070508 cholesterol import;GO:0006700 C21-steroid hormone biosynthetic process;GO:0035376 sterol import							0	1	0	0	0	0	0	0	0	0	0	0	0	0	0	0	0	0	0	0
STK10	6793	symbol	H. sapiens	6793	H. sapiens	STK10	serine/threonine kinase 10	GO:2000401 regulation of lymphocyte migration;GO:0072676 lymphocyte migration;GO:0002685 regulation of leukocyte migration	STE Ser/Thr protein kinase family	Enzymes/{ENZYME proteins/Transferases,Kinases/STE Ser/Thr protein kinases}	Nucleus but not nucleoli				0	0	0	0	0	1	0	0	1	0	0	0	0	0	0	0	0	0	0	0
STK4	6789	symbol	H. sapiens	6789	H. sapiens	STK4	serine/threonine kinase 4	GO:0060800 regulation of cell differentiation involved in embryonic placenta development;GO:1902043 positive regulation of extrinsic apoptotic signaling pathway via death domain receptors;GO:0001569 branching involved in blood vessel morphogenesis	STE Ser/Thr protein kinase family	Enzymes/{ENZYME proteins/Transferases,Kinases/STE Ser/Thr protein kinases};RAS pathway related proteins	Nucleus but not nucleoli				0	0	0	0	0	0	0	0	0	0	0	0	0	0	0	0	0	0	0	0
STX17	55014	symbol	H. sapiens	55014	H. sapiens	STX17	syntaxin 17	GO:0016240 autophagosome docking;GO:0097111 endoplasmic reticulum-Golgi intermediate compartment organization;GO:0034497 protein localization to pre-autophagosomal structure			Nucleoli;Cytoplasm				0	0	0	0	0	0	0	0	0	0	0	0	0	0	0	0	0	0	0	0
STX18	53407	symbol	H. sapiens	53407	H. sapiens	STX18	syntaxin 18	GO:1902953 positive regulation of ER to Golgi vesicle-mediated transport;GO:0090158 endoplasmic reticulum membrane organization;GO:1903358 regulation of Golgi organization			Plasma membrane				0	0	0	0	0	0	0	0	0	0	0	0	0	0	0	0	0	0	0	0
STX6	10228	symbol	H. sapiens	10228	H. sapiens	STX6	syntaxin 6	GO:0090161 Golgi ribbon formation;GO:0032456 endocytic recycling;GO:0042147 retrograde transport, endosome to Golgi			Golgi apparatus				0	0	0	0	0	0	0	0	0	0	0	0	0	0	0	0	0	0	0	0
STXBP1	6812	symbol	H. sapiens	6812	H. sapiens	STXBP1	syntaxin binding protein 1	GO:0031630 regulation of synaptic vesicle fusion to presynaptic membrane;GO:0010807 regulation of synaptic vesicle priming;GO:0032229 negative regulation of synaptic transmission, GABAergic			Nucleus but not nucleoli;Cytoplasm			(M5957)HALLMARK PANCREAS BETA CELLS	0	0	0	0	0	1	0	0	0	0	0	0	1	0	0	0	0	0	0	0
STXBP4	252983	symbol	H. sapiens	252983	H. sapiens	STXBP4	syntaxin binding protein 4	GO:0061178 regulation of insulin secretion involved in cellular response to glucose stimulus;GO:0010838 positive regulation of keratinocyte proliferation;GO:0035773 insulin secretion involved in cellular response to glucose stimulus			Nucleus but not nucleoli;Cytoplasm		(M247)PID INSULIN GLUCOSE PATHWAY; (M236)PID DELTA NP63 PATHWAY		0	0	0	0	0	0	0	0	0	0	0	0	0	0	0	0	0	1	0	0
SULT1E1	6783	symbol	H. sapiens	6783	H. sapiens	SULT1E1	sulfotransferase family 1E member 1	GO:0050427 3'-phosphoadenosine 5'-phosphosulfate metabolic process;GO:0034035 purine ribonucleoside bisphosphate metabolic process;GO:0008210 estrogen metabolic process		Enzymes/ENZYME proteins/Transferases		Cyclizine (Sulfotransferase activity);Adenosine-3'-5'-Diphosphate (Sulfotransferase activity);3'-Phosphate-Adenosine-5'-Phosphate Sulfate (Sulfotransferase activity);3,5,3',5'-Tetrachloro-Biphenyl-4,4'-Diol (Sulfotransferase activity)			0	0	0	0	0	0	0	0	0	0	0	0	0	0	0	0	0	0	1	0
SULT4A1	25830	symbol	H. sapiens	25830	H. sapiens	SULT4A1	sulfotransferase family 4A member 1	GO:0050427 3'-phosphoadenosine 5'-phosphosulfate metabolic process;GO:0034035 purine ribonucleoside bisphosphate metabolic process;GO:0033875 ribonucleoside bisphosphate metabolic process							0	0	0	0	0	0	0	0	0	0	0	0	0	0	0	0	0	0	1	0
SUOX	6821	symbol	H. sapiens	6821	H. sapiens	SUOX	sulfite oxidase	GO:0070221 sulfide oxidation, using sulfide:quinone oxidoreductase;GO:0019418 sulfide oxidation;GO:0042128 nitrate assimilation		Enzymes/ENZYME proteins/Oxidoreductases		(Molybdopterin-S,S)-Dioxo-Thio-Molybdenum(V) (Sulfite oxidase activity)			0	0	0	0	0	0	0	0	0	0	0	1	0	0	0	0	0	0	0	0
SUPT4H1	6827	symbol	H. sapiens	6827	H. sapiens	SUPT4H1	SPT4 homolog, DSIF elongation factor subunit	GO:0050434 positive regulation of viral transcription;GO:0034244 negative regulation of transcription elongation from RNA polymerase II promoter;GO:0046782 regulation of viral transcription			Nucleus			(M5898)HALLMARK DNA REPAIR	0	0	0	0	0	0	0	0	0	0	0	0	0	0	0	0	0	0	0	0
SUPT7L	9913	symbol	H. sapiens	9913	H. sapiens	SUPT7L	SPT7-like STAGA complex gamma subunit	GO:0051457 maintenance of protein location in nucleus;GO:0043966 histone H3 acetylation;GO:0072595 maintenance of protein localization in organelle			Nucleus but not nucleoli		(M139)PID MYC PATHWAY; (M66)PID MYC ACTIV PATHWAY		0	0	0	0	0	0	0	0	0	0	0	0	0	0	0	0	0	0	0	0
SURF4	6836	symbol	H. sapiens	6836	H. sapiens	SURF4	surfeit 4	GO:0034498 early endosome to Golgi transport;GO:0032527 protein exit from endoplasmic reticulum;GO:0006890 retrograde vesicle-mediated transport, Golgi to ER							0	0	0	0	0	0	0	0	1	0	0	0	0	0	0	0	0	0	0	0
SURF6	6838	symbol	H. sapiens	6838	H. sapiens	SURF6	surfeit 6	GO:0042273 ribosomal large subunit biogenesis;GO:0042274 ribosomal small subunit biogenesis;GO:0042254 ribosome biogenesis			Nucleoli				0	0	0	1	0	0	0	0	0	0	0	0	0	0	0	0	0	0	0	0
SVOP	55530	symbol	H. sapiens	55530	H. sapiens	SVOP	SV2 related protein	GO:0055085 transmembrane transport;GO:0006810 transport;GO:0051234 establishment of localization							0	0	0	0	0	0	0	0	0	0	0	0	0	0	0	0	0	0	0	0
SWAP70	23075	symbol	H. sapiens	23075	H. sapiens	SWAP70	SWAP switching B-cell complex subunit 70	GO:0033633 negative regulation of cell-cell adhesion mediated by integrin;GO:0060754 positive regulation of mast cell chemotaxis;GO:0045190 isotype switching						(M5947)HALLMARK IL2 STAT5 SIGNALING	0	0	0	0	0	1	0	0	0	1	0	0	0	0	0	0	1	1	0	0
SWSAP1	126074	symbol	H. sapiens	126074	H. sapiens	SWSAP1	SWIM-type zinc finger 7 associated protein 1	GO:0000724 double-strand break repair via homologous recombination;GO:0000725 recombinational repair;GO:0050821 protein stabilization							0	0	0	0	0	0	0	0	0	0	0	0	0	0	0	0	0	0	0	0
SYNDIG1L	646658	symbol	H. sapiens	646658	H. sapiens	SYNDIG1L	synapse differentiation inducing 1 like	GO:0009607 response to biotic stimulus;GO:0050896 response to stimulus;GO:0008150 biological_process							0	0	0	0	0	0	0	0	0	0	0	0	0	0	0	0	1	0	0	0
SYNGR2	9144	symbol	H. sapiens	9144	H. sapiens	SYNGR2	synaptogyrin 2				Golgi apparatus			(M5909)HALLMARK MYOGENESIS; (M5947)HALLMARK IL2 STAT5 SIGNALING	0	0	0	0	0	0	0	0	0	0	0	0	0	0	0	0	0	0	0	0
TAB1	10454	symbol	H. sapiens	10454	H. sapiens	TAB1	TGF-beta activated kinase 1 (MAP3K7) binding protein 1	GO:0070423 nucleotide-binding oligomerization domain containing signaling pathway;GO:0002755 MyD88-dependent toll-like receptor signaling pathway;GO:0000185 activation of MAPKKK activity			Nucleus but not nucleoli		(M20)PID P38 MKK3 6PATHWAY; (M76)PID P38 ALPHA BETA PATHWAY; (M23)PID WNT NONCANONICAL PATHWAY		0	0	0	0	0	0	0	0	0	0	1	0	0	0	0	0	1	0	0	0
TACO1	51204	symbol	H. sapiens	51204	H. sapiens	TACO1	translational activator of cytochrome c oxidase I	GO:0006417 regulation of translation;GO:0034248 regulation of cellular amide metabolic process;GO:0010608 posttranscriptional regulation of gene expression			Mitochondria				0	0	0	0	0	0	0	0	0	0	0	0	0	0	0	0	0	0	0	0
TACR2	6865	symbol	H. sapiens	6865	H. sapiens	TACR2	tachykinin receptor 2	GO:0033685 negative regulation of luteinizing hormone secretion;GO:0014057 positive regulation of acetylcholine secretion, neurotransmission;GO:0033684 regulation of luteinizing hormone secretion		G-protein coupled receptors/GPCRs excl olfactory receptors					0	0	0	0	0	0	0	0	0	0	0	0	0	0	0	0	0	0	0	0
TADA2B	93624	symbol	H. sapiens	93624	H. sapiens	TADA2B	transcriptional adaptor 2B	GO:0035066 positive regulation of histone acetylation;GO:2000758 positive regulation of peptidyl-lysine acetylation;GO:0035065 regulation of histone acetylation		Transcription factors/Helix-turn-helix domains	Nucleus but not nucleoli		(M145)PID P53 DOWNSTREAM PATHWAY		0	0	0	0	0	0	0	0	0	0	0	0	0	0	0	0	0	0	0	0
TAPBP	6892	symbol	H. sapiens	6892	H. sapiens	TAPBP	TAP binding protein	GO:0050823 peptide antigen stabilization;GO:0050822 peptide stabilization;GO:0019885 antigen processing and presentation of endogenous peptide antigen via MHC class I						(M5913)HALLMARK INTERFERON GAMMA RESPONSE; (M5932)HALLMARK INFLAMMATORY RESPONSE; (M5950)HALLMARK ALLOGRAFT REJECTION	0	0	0	0	0	0	0	0	0	0	0	0	0	0	0	0	0	0	0	0
TARSL2	123283	symbol	H. sapiens	123283	H. sapiens	TARSL2	threonyl-tRNA synthetase like 2	GO:0006435 threonyl-tRNA aminoacylation;GO:0006418 tRNA aminoacylation for protein translation;GO:0043039 tRNA aminoacylation		Enzymes/ENZYME proteins/Ligase	Cytoplasm				0	1	0	1	0	0	0	0	0	0	0	0	0	0	0	0	0	0	0	0
TBC1D13	54662	symbol	H. sapiens	54662	H. sapiens	TBC1D13	TBC1 domain family member 13	GO:0031338 regulation of vesicle fusion;GO:1902017 regulation of cilium assembly;GO:0090630 activation of GTPase activity			Nucleoli				0	0	0	0	0	0	0	0	0	0	0	0	0	0	0	0	0	0	0	0
TBC1D17	79735	symbol	H. sapiens	79735	H. sapiens	TBC1D17	TBC1 domain family member 17	GO:1902017 regulation of cilium assembly;GO:0042147 retrograde transport, endosome to Golgi;GO:0060491 regulation of cell projection assembly							0	0	0	0	0	0	0	0	0	0	0	0	0	0	0	0	0	0	0	0
TBC1D8	11138	symbol	H. sapiens	11138	H. sapiens	TBC1D8	TBC1 domain family member 8	GO:0031338 regulation of vesicle fusion;GO:1902017 regulation of cilium assembly;GO:0090630 activation of GTPase activity			Nucleus				0	0	0	0	0	0	0	0	0	0	0	0	0	0	0	0	0	0	0	0
TBCC	6903	symbol	H. sapiens	6903	H. sapiens	TBCC	tubulin folding cofactor C	GO:0007021 tubulin complex assembly;GO:0007023 post-chaperonin tubulin folding pathway;GO:0043623 cellular protein complex assembly			Cytoplasm				0	0	0	0	0	0	0	0	0	0	0	0	0	0	0	0	0	0	0	0
TBL2	26608	symbol	H. sapiens	26608	H. sapiens	TBL2	transducin beta like 2	GO:0042149 cellular response to glucose starvation;GO:0030968 endoplasmic reticulum unfolded protein response;GO:0071456 cellular response to hypoxia			Cytoplasm				0	0	0	0	0	0	0	0	0	0	0	0	0	0	0	0	0	0	0	0
TCEANC2	127428	symbol	H. sapiens	127428	H. sapiens	TCEANC2	transcription elongation factor A N-terminal and central domain containing 2	GO:0006351 transcription, DNA-templated;GO:0097659 nucleic acid-templated transcription;GO:0032774 RNA biosynthetic process			Nucleus but not nucleoli				0	0	0	0	0	0	0	0	0	0	0	0	0	0	0	0	0	0	0	0
TCHP	84260	symbol	H. sapiens	84260	H. sapiens	TCHP	trichoplein keratin filament binding	GO:1902018 negative regulation of cilium assembly;GO:1902116 negative regulation of organelle assembly;GO:1902017 regulation of cilium assembly			Plasma membrane;Cytoplasm;Centrosome				0	0	0	0	0	0	0	0	0	0	0	0	0	0	0	0	0	0	0	0
TDRP	157695	symbol	H. sapiens	157695	H. sapiens	TDRP	testis development related protein	GO:0007283 spermatogenesis;GO:0048232 male gamete generation;GO:0007276 gamete generation			Cytoplasm;Vesicles				0	0	0	0	0	0	0	0	0	0	0	0	0	0	0	0	0	0	0	0
TERB2	145645	symbol	H. sapiens	145645	H. sapiens	TERB2	telomere repeat binding bouquet formation protein 2	GO:0070197 meiotic attachment of telomere to nuclear envelope;GO:0044821 meiotic telomere tethering at nuclear periphery;GO:0045141 meiotic telomere clustering			Nucleus;Nucleoli;Centrosome				0	0	0	0	0	0	0	0	0	0	0	0	0	0	0	0	0	0	0	0
TEX37	200523	symbol	H. sapiens	200523	H. sapiens	TEX37	testis expressed 37								0	0	0	0	0	0	0	0	0	0	0	0	0	0	0	0	0	0	0	0
TFF1	7031	symbol	H. sapiens	7031	H. sapiens	TFF1	trefoil factor 1	GO:0030277 maintenance of gastrointestinal epithelium;GO:0010669 epithelial structure maintenance;GO:0035902 response to immobilization stress					(M285)PID HNF3A PATHWAY; (M200)PID ERA GENOMIC PATHWAY	(M5907)HALLMARK ESTROGEN RESPONSE LATE; (M5906)HALLMARK ESTROGEN RESPONSE EARLY	0	0	0	0	0	0	1	0	0	0	0	0	0	0	0	0	0	0	0	0
TFF2	7032	symbol	H. sapiens	7032	H. sapiens	TFF2	trefoil factor 2	GO:0070098 chemokine-mediated signaling pathway;GO:0007586 digestion;GO:0019221 cytokine-mediated signaling pathway			Vesicles	Pyroglutamic Acid		(M5956)HALLMARK KRAS SIGNALING DN	0	0	0	0	1	0	0	0	0	0	0	0	0	0	0	0	0	0	0	0
TFF3	7033	symbol	H. sapiens	7033	H. sapiens	TFF3	trefoil factor 3	GO:0007586 digestion;GO:0042060 wound healing;GO:0009611 response to wounding					(M28)PID IL4 2PATHWAY; (M255)PID HIF1 TFPATHWAY	(M5907)HALLMARK ESTROGEN RESPONSE LATE; (M5906)HALLMARK ESTROGEN RESPONSE EARLY; (M5937)HALLMARK GLYCOLYSIS	0	0	0	0	0	0	0	0	0	0	0	0	0	0	0	0	0	0	0	0
TGM2	7052	symbol	H. sapiens	7052	H. sapiens	TGM2	transglutaminase 2	GO:0032471 negative regulation of endoplasmic reticulum calcium ion concentration;GO:0018153 isopeptide cross-linking via N6-(L-isoglutamyl)-L-lysine;GO:0051561 positive regulation of mitochondrial calcium ion concentration		Enzymes/ENZYME proteins/Transferases	Cytoplasm	Guanosine-5'-Diphosphate (Protein-glutamine gamma-glutamyltransferase activity)	(M118)PID INTEGRIN A9B1 PATHWAY; (M99)PID TXA2PATHWAY; (M18)PID INTEGRIN1 PATHWAY	(M5947)HALLMARK IL2 STAT5 SIGNALING; (M5906)HALLMARK ESTROGEN RESPONSE EARLY; (M5930)HALLMARK EPITHELIAL MESENCHYMAL TRANSITION	0	0	0	0	0	1	0	0	0	1	0	0	0	0	0	0	0	1	0	0
TGM4	7047	symbol	H. sapiens	7047	H. sapiens	TGM4	transglutaminase 4	GO:0018149 peptide cross-linking;GO:0006464 cellular protein modification process;GO:0036211 protein modification process		Enzymes/ENZYME proteins/Transferases			(M3468)NABA ECM REGULATORS; (M5885)NABA MATRISOME ASSOCIATED; (M5889)NABA MATRISOME		0	0	0	0	0	0	0	0	0	0	0	0	0	0	0	0	0	0	0	0
THADA	63892	symbol	H. sapiens	63892	H. sapiens	THADA	THADA, armadillo repeat containing				Cytoplasm				0	0	0	0	0	0	0	0	0	0	0	0	0	0	0	0	0	0	0	0
THBD	7056	symbol	H. sapiens	7056	H. sapiens	THBD	thrombomodulin	GO:0051918 negative regulation of fibrinolysis;GO:0051917 regulation of fibrinolysis;GO:0010544 negative regulation of platelet activation		CD markers		Drotrecogin alfa (Transmembrane signaling receptor activity);Ibuprofen (Transmembrane signaling receptor activity)	(M65)PID FRA PATHWAY	(M5944)HALLMARK ANGIOGENESIS; (M5946)HALLMARK COAGULATION	0	0	0	0	0	1	0	0	0	1	0	0	1	0	0	0	1	0	0	0
THOC1	9984	symbol	H. sapiens	9984	H. sapiens	THOC1	THO complex 1	GO:0048297 negative regulation of isotype switching to IgA isotypes;GO:0048296 regulation of isotype switching to IgA isotypes;GO:0045829 negative regulation of isotype switching			Nucleus but not nucleoli				0	0	0	0	0	1	0	0	0	0	0	0	0	0	0	0	1	0	0	0
THOC3	84321	symbol	H. sapiens	84321	H. sapiens	THOC3	THO complex 3	GO:0046784 viral mRNA export from host cell nucleus;GO:0075733 intracellular transport of virus;GO:0006406 mRNA export from nucleus			Nucleus but not nucleoli				0	0	0	0	0	0	0	0	0	0	0	0	0	0	0	0	0	0	0	0
THRA	7067	symbol	H. sapiens	7067	H. sapiens	THRA	thyroid hormone receptor, alpha	GO:0017055 negative regulation of RNA polymerase II transcriptional preinitiation complex assembly;GO:0042994 cytoplasmic sequestering of transcription factor;GO:0045925 positive regulation of female receptivity		Nuclear receptors;Transcription factors/Zinc-coordinating DNA-binding domains	Cytoplasm	Liothyronine (Zinc ion binding);Levothyroxine (Zinc ion binding);Dextrothyroxine (Zinc ion binding);Liotrix (Zinc ion binding);3,5-Dichloro-4-[(4-Hydroxy-3-Isopropylphenoxy)Phenylacetic Acid (Zinc ion binding);KB2115 (Zinc ion binding);NRP409 (Zinc ion binding)	(M162)PID RXR VDR PATHWAY		1	0	0	0	0	0	0	0	0	0	0	0	0	0	0	0	0	0	0	0
THUMPD1	55623	symbol	H. sapiens	55623	H. sapiens	THUMPD1	THUMP domain containing 1	GO:0000154 rRNA modification;GO:0006400 tRNA modification;GO:0008033 tRNA processing			Cytoplasm				0	0	0	1	0	0	0	0	0	0	0	0	0	0	0	0	0	0	0	0
THY1	7070	symbol	H. sapiens	7070	H. sapiens	THY1	Thy-1 cell surface antigen	GO:0051281 positive regulation of release of sequestered calcium ion into cytosol;GO:0051279 regulation of release of sequestered calcium ion into cytosol;GO:0050860 negative regulation of T cell receptor signaling pathway		CD markers			(M169)PID INTEGRIN2 PATHWAY; (M159)PID AMB2 NEUTROPHILS PATHWAY; (M53)PID INTEGRIN3 PATHWAY	(M5919)HALLMARK HEDGEHOG SIGNALING; (M5916)HALLMARK APICAL SURFACE; (M5950)HALLMARK ALLOGRAFT REJECTION	0	0	0	0	0	1	0	0	0	0	0	0	0	0	0	0	0	1	0	0
TICAM2	353376	symbol	H. sapiens	353376	H. sapiens	TICAM2	toll like receptor adaptor molecule 2	GO:0035669 TRAM-dependent toll-like receptor 4 signaling pathway;GO:0034128 negative regulation of MyD88-independent toll-like receptor signaling pathway;GO:0035668 TRAM-dependent toll-like receptor signaling pathway					(M110)PID IL1 PATHWAY		0	0	0	0	1	0	0	0	1	1	0	0	0	0	0	1	1	0	0	0
TIGAR	57103	symbol	H. sapiens	57103	H. sapiens	TIGAR	TP53 induced glycolysis regulatory phosphatase	GO:1904024 negative regulation of glucose catabolic process to lactate via pyruvate;GO:1904023 regulation of glucose catabolic process to lactate via pyruvate;GO:1902153 regulation of response to DNA damage checkpoint signaling		Enzymes/ENZYME proteins/Hydrolases			(M145)PID P53 DOWNSTREAM PATHWAY		1	1	0	0	0	0	1	0	0	0	0	1	0	0	0	0	1	0	1	0
TIMM13	26517	symbol	H. sapiens	26517	H. sapiens	TIMM13	translocase of inner mitochondrial membrane 13	GO:0045039 protein import into mitochondrial inner membrane;GO:0090151 establishment of protein localization to mitochondrial membrane;GO:0072321 chaperone-mediated protein transport			Mitochondria			(M5936)HALLMARK OXIDATIVE PHOSPHORYLATION	0	0	0	0	0	0	0	0	0	0	0	0	0	0	0	0	0	0	0	0
TIMM21	29090	symbol	H. sapiens	29090	H. sapiens	TIMM21	translocase of inner mitochondrial membrane 21	GO:0033617 mitochondrial respiratory chain complex IV assembly;GO:0030150 protein import into mitochondrial matrix;GO:0032981 mitochondrial respiratory chain complex I assembly			Nucleus but not nucleoli				0	0	0	0	0	0	0	0	0	0	0	0	0	0	0	0	0	0	0	0
TIMMDC1	51300	symbol	H. sapiens	51300	H. sapiens	TIMMDC1	translocase of inner mitochondrial membrane domain containing 1	GO:0032981 mitochondrial respiratory chain complex I assembly;GO:0010257 NADH dehydrogenase complex assembly;GO:0097031 mitochondrial respiratory chain complex I biogenesis			Mitochondria				0	0	0	0	0	0	0	0	0	0	0	0	0	0	0	0	0	0	0	0
TLR6	10333	symbol	H. sapiens	10333	H. sapiens	TLR6	toll like receptor 6	GO:0042496 detection of diacyl bacterial lipopeptide;GO:0034150 toll-like receptor 6 signaling pathway;GO:0038124 toll-like receptor TLR6:TLR2 signaling pathway		CD markers			(M264)PID TOLL ENDOGENOUS PATHWAY	(M5950)HALLMARK ALLOGRAFT REJECTION	0	0	0	0	0	1	0	0	0	1	0	0	0	0	0	1	1	0	0	0
TLR9	54106	symbol	H. sapiens	54106	H. sapiens	TLR9	toll like receptor 9	GO:1901895 negative regulation of calcium-transporting ATPase activity;GO:0042346 positive regulation of NF-kappaB import into nucleus;GO:0034123 positive regulation of toll-like receptor signaling pathway		CD markers		Chloroquine (Transmembrane signaling receptor activity);Hydroxychloroquine (Transmembrane signaling receptor activity);ISS-1018 (Transmembrane signaling receptor activity);SCV-07 (Transmembrane signaling receptor activity)			0	1	0	0	0	0	0	0	0	1	0	0	0	0	0	1	1	0	1	0
TM4SF20	79853	symbol	H. sapiens	79853	H. sapiens	TM4SF20	transmembrane 4 L six family member 20	GO:0045861 negative regulation of proteolysis;GO:0030162 regulation of proteolysis;GO:0032269 negative regulation of cellular protein metabolic process							0	0	0	0	0	0	0	0	0	0	0	0	0	0	0	0	0	0	0	0
TMED3	23423	symbol	H. sapiens	23423	H. sapiens	TMED3	transmembrane p24 trafficking protein 3	GO:0006890 retrograde vesicle-mediated transport, Golgi to ER;GO:0006888 ER to Golgi vesicle-mediated transport;GO:0048193 Golgi vesicle transport		Transporters					0	0	0	0	0	0	0	0	0	0	0	0	0	0	0	0	0	0	0	0
TMEM120B	144404	symbol	H. sapiens	144404	H. sapiens	TMEM120B	transmembrane protein 120B	GO:0051291 protein heterooligomerization;GO:0045444 fat cell differentiation;GO:0051259 protein oligomerization			Nucleoli				0	0	0	0	0	0	0	0	0	0	0	0	0	0	0	0	0	0	0	0
TMEM123	114908	symbol	H. sapiens	114908	H. sapiens	TMEM123	transmembrane protein 123	GO:0070267 oncosis;GO:0045793 positive regulation of cell size;GO:0070265 necrotic cell death			Cytoplasm				0	0	0	0	0	0	0	0	0	0	0	0	0	0	0	0	0	0	0	0
TMEM130	222865	symbol	H. sapiens	222865	H. sapiens	TMEM130	transmembrane protein 130								0	0	0	0	0	0	0	0	0	0	0	0	0	0	0	0	0	0	0	0
TMEM144	55314	symbol	H. sapiens	55314	H. sapiens	TMEM144	transmembrane protein 144				Mitochondria				0	0	0	0	0	0	0	0	0	0	0	0	0	0	0	0	0	0	0	0
TMEM150C	441027	symbol	H. sapiens	441027	H. sapiens	TMEM150C	transmembrane protein 150C								0	0	0	0	0	0	0	0	0	0	0	0	0	0	0	0	0	0	0	0
TMEM176A	55365	symbol	H. sapiens	55365	H. sapiens	TMEM176A	transmembrane protein 176A	GO:2001199 negative regulation of dendritic cell differentiation;GO:2001198 regulation of dendritic cell differentiation;GO:0097028 dendritic cell differentiation			Mitochondria			(M5953)HALLMARK KRAS SIGNALING UP	0	0	0	0	0	0	0	0	0	0	0	0	0	0	0	0	0	0	0	0
TMEM18	129787	symbol	H. sapiens	129787	H. sapiens	TMEM18	transmembrane protein 18	GO:0016477 cell migration;GO:0048870 cell motility;GO:0051674 localization of cell			Mitochondria				0	0	0	0	0	0	0	0	0	0	0	0	0	0	0	0	0	0	0	0
TMEM185A	84548	symbol	H. sapiens	84548	H. sapiens	TMEM185A	transmembrane protein 185A								0	0	0	0	0	0	0	0	0	0	0	0	0	0	0	0	0	0	0	0
TMEM186	25880	symbol	H. sapiens	25880	H. sapiens	TMEM186	transmembrane protein 186				Cell Junctions				0	0	0	0	0	0	0	0	0	0	0	0	0	0	0	0	0	0	0	0
TMEM19	55266	symbol	H. sapiens	55266	H. sapiens	TMEM19	transmembrane protein 19								0	0	0	0	0	0	0	0	0	0	0	0	0	0	0	0	0	0	0	0
TMEM213	155006	symbol	H. sapiens	155006	H. sapiens	TMEM213	transmembrane protein 213								0	0	0	0	0	0	0	0	0	0	0	0	0	0	0	0	0	0	0	0
TMEM222	84065	symbol	H. sapiens	84065	H. sapiens	TMEM222	transmembrane protein 222				Plasma membrane;Cytoplasm				0	0	0	0	0	0	0	0	0	0	0	0	0	0	0	0	0	0	0	0
TMEM225	338661	symbol	H. sapiens	338661	H. sapiens	TMEM225	transmembrane protein 225	GO:0010923 negative regulation of phosphatase activity;GO:0035305 negative regulation of dephosphorylation;GO:0010921 regulation of phosphatase activity							0	0	0	0	0	0	0	0	0	0	0	0	0	0	0	0	0	0	0	0
TMEM231	79583	symbol	H. sapiens	79583	H. sapiens	TMEM231	transmembrane protein 231	GO:0007224 smoothened signaling pathway;GO:0060271 cilium assembly;GO:0044782 cilium organization			Vesicles				0	0	0	0	0	0	0	0	0	0	0	0	0	0	0	0	0	0	0	0
TMEM41A	90407	symbol	H. sapiens	90407	H. sapiens	TMEM41A	transmembrane protein 41A				Nucleus but not nucleoli				0	0	0	0	0	0	0	0	0	0	0	0	0	0	0	0	0	0	0	0
TMEM42	131616	symbol	H. sapiens	131616	H. sapiens	TMEM42	transmembrane protein 42				Nucleus but not nucleoli				0	0	0	0	0	0	0	0	0	0	0	0	0	0	0	0	0	0	0	0
TMEM43	79188	symbol	H. sapiens	79188	H. sapiens	TMEM43	transmembrane protein 43	GO:0071763 nuclear membrane organization;GO:0006998 nuclear envelope organization;GO:0006997 nucleus organization							0	0	0	0	0	0	0	0	0	0	0	0	0	0	0	0	0	0	0	0
TMEM45B	120224	symbol	H. sapiens	120224	H. sapiens	TMEM45B	transmembrane protein 45B				Nucleus but not nucleoli;Cytoplasm				0	0	0	0	0	0	0	0	0	0	0	0	0	0	0	0	0	0	0	0
TMEM50B	757	symbol	H. sapiens	757	H. sapiens	TMEM50B	transmembrane protein 50B	GO:0008150 biological_process			Nucleoli				0	0	0	0	0	0	0	0	0	0	0	0	0	0	0	0	0	0	0	0
TMEM63A	9725	symbol	H. sapiens	9725	H. sapiens	TMEM63A	transmembrane protein 63A	GO:0006811 ion transport;GO:0006810 transport;GO:0051234 establishment of localization							0	0	0	0	0	0	0	0	1	0	0	0	0	0	0	0	0	0	0	0
TMEM69	51249	symbol	H. sapiens	51249	H. sapiens	TMEM69	transmembrane protein 69								0	0	0	0	0	0	0	0	0	0	0	0	0	0	0	0	0	0	0	0
TMEM72	643236	symbol	H. sapiens	643236	H. sapiens	TMEM72	transmembrane protein 72								0	0	0	0	0	0	0	0	0	0	0	0	0	0	0	0	0	0	0	0
TMEM81	388730	symbol	H. sapiens	388730	H. sapiens	TMEM81	transmembrane protein 81				Cytoskeleton (Intermediate filaments)				0	0	0	0	0	0	0	0	0	0	0	0	0	0	0	0	0	0	0	0
TMEM86B	255043	symbol	H. sapiens	255043	H. sapiens	TMEM86B	transmembrane protein 86B	GO:0046485 ether lipid metabolic process;GO:0006662 glycerol ether metabolic process;GO:0018904 ether metabolic process		Enzymes/ENZYME proteins/Hydrolases					0	1	0	0	0	0	0	0	0	0	0	0	0	0	0	0	0	0	0	0
TMEM88B	643965	symbol	H. sapiens	643965	H. sapiens	TMEM88B	transmembrane protein 88B								0	0	0	0	0	0	0	0	0	0	0	0	0	0	0	0	0	0	0	0
TMIE	259236	symbol	H. sapiens	259236	H. sapiens	TMIE	transmembrane inner ear	GO:0042472 inner ear morphogenesis;GO:0042471 ear morphogenesis;GO:0007605 sensory perception of sound		Transporters	Cytoplasm				0	0	0	0	0	0	0	0	0	0	0	0	0	0	0	0	0	0	0	0
TMOD3	29766	symbol	H. sapiens	29766	H. sapiens	TMOD3	tropomodulin 3	GO:0051694 pointed-end actin filament capping;GO:0051693 actin filament capping;GO:0030835 negative regulation of actin filament depolymerization			Cytoplasm				0	0	0	0	0	0	0	0	0	0	0	0	0	0	0	0	0	0	0	0
TMPRSS4	56649	symbol	H. sapiens	56649	H. sapiens	TMPRSS4	transmembrane protease, serine 4	GO:0006898 receptor-mediated endocytosis;GO:0006897 endocytosis;GO:0016192 vesicle-mediated transport		Enzymes/Peptidases/Serine-type peptidases	Nucleus but not nucleoli				0	0	0	0	0	0	0	0	0	0	0	0	0	0	0	0	0	0	0	0
TMPRSS7	344805	symbol	H. sapiens	344805	H. sapiens	TMPRSS7	transmembrane protease, serine 7	GO:0006508 proteolysis;GO:0019538 protein metabolic process;GO:0043170 macromolecule metabolic process		Enzymes/Peptidases/Serine-type peptidases					0	0	0	0	0	0	0	0	0	0	0	0	0	0	0	0	0	0	0	0
TMX4	56255	symbol	H. sapiens	56255	H. sapiens	TMX4	thioredoxin related transmembrane protein 4	GO:0045454 cell redox homeostasis;GO:0034976 response to endoplasmic reticulum stress;GO:0006457 protein folding			Nuclear membrane				0	0	0	0	0	0	0	0	0	0	0	1	0	0	0	0	0	1	0	0
TNFAIP8L1	126282	symbol	H. sapiens	126282	H. sapiens	TNFAIP8L1	TNF alpha induced protein 8 like 1	GO:0032007 negative regulation of TOR signaling;GO:0032006 regulation of TOR signaling;GO:0031929 TOR signaling							0	1	0	0	0	0	0	0	0	0	0	0	0	0	0	0	0	0	0	0
TNFRSF13C	115650	symbol	H. sapiens	115650	H. sapiens	TNFRSF13C	TNF receptor superfamily member 13C	GO:0031295 T cell costimulation;GO:0031296 B cell costimulation;GO:0002636 positive regulation of germinal center formation		CD markers	Nucleus				0	0	0	0	1	1	0	0	0	0	0	0	0	0	0	1	0	0	0	0
TNFRSF1B	7133	symbol	H. sapiens	7133	H. sapiens	TNFRSF1B	TNF receptor superfamily member 1B	GO:0051044 positive regulation of membrane protein ectodomain proteolysis;GO:0051043 regulation of membrane protein ectodomain proteolysis;GO:0050779 RNA destabilization		CD markers		Etanercept (Ubiquitin protein ligase binding)	(M11736)SA MMP CYTOKINE CONNECTION; (M18030)ST TUMOR NECROSIS FACTOR PATHWAY; (M128)PID TNF PATHWAY	(M5897)HALLMARK IL6 JAK STAT3 SIGNALING; (M5953)HALLMARK KRAS SIGNALING UP; (M5947)HALLMARK IL2 STAT5 SIGNALING	0	0	0	0	1	0	0	0	1	1	0	0	0	0	0	0	1	0	0	0
TNFRSF4	7293	symbol	H. sapiens	7293	H. sapiens	TNFRSF4	TNF receptor superfamily member 4	GO:0051024 positive regulation of immunoglobulin secretion;GO:0046718 viral entry into host cell;GO:0051023 regulation of immunoglobulin secretion		CD markers			(M272)PID CD8 TCR DOWNSTREAM PATHWAY	(M5947)HALLMARK IL2 STAT5 SIGNALING	0	0	0	0	1	1	0	0	0	1	0	0	0	0	0	0	1	0	0	0
TNFSF13	8741	symbol	H. sapiens	8741	H. sapiens	TNFSF13	tumor necrosis factor superfamily member 13	GO:0048298 positive regulation of isotype switching to IgA isotypes;GO:0048296 regulation of isotype switching to IgA isotypes;GO:0048290 isotype switching to IgA isotypes		CD markers			(M5883)NABA SECRETED FACTORS; (M5885)NABA MATRISOME ASSOCIATED; (M5889)NABA MATRISOME		0	0	0	0	1	1	0	0	0	0	0	0	0	0	0	0	1	0	0	0
TNN	63923	symbol	H. sapiens	63923	H. sapiens	TNN	tenascin N	GO:0007409 axonogenesis;GO:0007160 cell-matrix adhesion;GO:0061564 axon development					(M3008)NABA ECM GLYCOPROTEINS; (M5884)NABA CORE MATRISOME; (M5889)NABA MATRISOME		0	0	0	0	0	0	0	0	0	0	0	0	0	0	0	0	0	0	0	0
TNNT2	7139	symbol	H. sapiens	7139	H. sapiens	TNNT2	troponin T2, cardiac type	GO:0032972 regulation of muscle filament sliding speed;GO:0032971 regulation of muscle filament sliding;GO:0030049 muscle filament sliding			Nucleus;Nucleoli;Cytoskeleton (Microtubules)			(M5953)HALLMARK KRAS SIGNALING UP; (M5909)HALLMARK MYOGENESIS	0	0	0	0	0	0	0	0	0	0	0	0	0	0	0	0	0	0	0	0
TNS3	64759	symbol	H. sapiens	64759	H. sapiens	TNS3	tensin 3	GO:0048286 lung alveolus development;GO:0030324 lung development;GO:0030323 respiratory tube development			Focal Adhesions				0	0	0	0	0	0	0	0	0	0	0	0	0	0	0	0	0	0	0	0
TOLLIP	54472	symbol	H. sapiens	54472	H. sapiens	TOLLIP	toll interacting protein	GO:0033235 positive regulation of protein sumoylation;GO:0033233 regulation of protein sumoylation;GO:0036010 protein localization to endosome			Plasma membrane;Cytoplasm		(M110)PID IL1 PATHWAY		0	0	0	0	0	1	0	0	1	1	0	0	0	0	0	0	1	0	0	0
TOM1L2	146691	symbol	H. sapiens	146691	H. sapiens	TOM1L2	target of myb1 like 2 membrane trafficking protein	GO:0045839 negative regulation of mitotic nuclear division;GO:0051784 negative regulation of nuclear division;GO:0007088 regulation of mitotic nuclear division			Cytoskeleton (Intermediate filaments)				0	0	0	0	0	0	0	0	0	0	0	0	0	0	0	0	0	0	0	0
TOMM20	9804	symbol	H. sapiens	9804	H. sapiens	TOMM20	translocase of outer mitochondrial membrane 20	GO:0016031 tRNA import into mitochondrion;GO:0035927 RNA import into mitochondrion;GO:0070096 mitochondrial outer membrane translocase complex assembly			Mitochondria				0	0	0	0	0	0	0	0	0	0	0	0	0	0	0	0	0	0	0	0
TOR3A	64222	symbol	H. sapiens	64222	H. sapiens	TOR3A	torsin family 3 member A								0	0	0	0	0	0	0	0	0	0	0	0	0	0	0	0	0	0	0	0
TPMT	7172	symbol	H. sapiens	7172	H. sapiens	TPMT	thiopurine S-methyltransferase	GO:0032259 methylation;GO:0006139 nucleobase-containing compound metabolic process;GO:0046483 heterocycle metabolic process		Enzymes/ENZYME proteins/Transferases		Olsalazine (Thiopurine s-methyltransferase activity)			0	0	0	0	0	0	0	0	0	0	0	0	0	0	0	0	0	0	0	0
TPP1	1200	symbol	H. sapiens	1200	H. sapiens	TPP1	tripeptidyl peptidase 1	GO:0036498 IRE1-mediated unfolded protein response;GO:0045453 bone resorption;GO:0007040 lysosome organization		Enzymes/{ENZYME proteins/Hydrolases,Peptidases/Serine-type peptidases}					0	0	1	0	0	0	0	1	0	0	0	0	0	0	0	0	0	0	0	0
TPRN	286262	symbol	H. sapiens	286262	H. sapiens	TPRN	taperin	GO:0007605 sensory perception of sound;GO:0050954 sensory perception of mechanical stimulus;GO:0007600 sensory perception			Plasma membrane				0	0	0	0	0	0	0	0	0	0	0	0	0	0	0	0	0	0	0	0
TPSB2	64499	symbol	H. sapiens	64499	H. sapiens	TPSB2	tryptase beta 2 (gene/pseudogene)	GO:0006508 proteolysis;GO:0019538 protein metabolic process;GO:0043170 macromolecule metabolic process		Enzymes/{ENZYME proteins/Hydrolases,Peptidases/Serine-type peptidases}		Amido Phenyl Pyruvic Acid (Serine-type peptidase activity);4-PIPERIDIN-4-YLBUTANAL (Serine-type peptidase activity);[4-(3-AMINOMETHYL-PHENYL)-PIPERIDIN-1-YL]-(5-PHENETHYL- PYRIDIN-3-YL)-METHANONE (Serine-type peptidase activity);(5-(aminomethyl)-2H-spiro[benzofuran-3,4'-piperidine]-1'-yl)(5-(phenylethynyl)furan-2-yl)methanone (Serine-type peptidase activity)			0	0	0	0	0	0	0	0	0	0	0	0	0	0	0	0	0	0	0	0
TRAF1	7185	symbol	H. sapiens	7185	H. sapiens	TRAF1	TNF receptor associated factor 1	GO:0010803 regulation of tumor necrosis factor-mediated signaling pathway;GO:0033209 tumor necrosis factor-mediated signaling pathway;GO:0051092 positive regulation of NF-kappaB transcription factor activity			Nucleus but not nucleoli		(M45)PID CD40 PATHWAY; (M197)PID HIV NEF PATHWAY; (M128)PID TNF PATHWAY	(M5953)HALLMARK KRAS SIGNALING UP; (M5915)HALLMARK APICAL JUNCTION; (M5947)HALLMARK IL2 STAT5 SIGNALING	0	0	0	0	1	0	0	0	0	0	1	0	0	0	0	0	0	0	0	0
TRAF3IP2	10758	symbol	H. sapiens	10758	H. sapiens	TRAF3IP2	TRAF3 interacting protein 2	GO:0002230 positive regulation of defense response to virus by host;GO:0001783 B cell apoptotic process;GO:0050691 regulation of defense response to virus by host			Golgi apparatus				0	0	0	0	0	0	0	0	0	1	0	0	0	0	0	0	1	0	0	0
TRAK1	22906	symbol	H. sapiens	22906	H. sapiens	TRAK1	trafficking kinesin protein 1	GO:0008333 endosome to lysosome transport;GO:0006493 protein O-linked glycosylation;GO:0007041 lysosomal transport							0	0	0	0	0	0	0	0	0	0	0	0	0	0	0	0	0	0	0	1
TRAK2	66008	symbol	H. sapiens	66008	H. sapiens	TRAK2	trafficking kinesin protein 2	GO:0006493 protein O-linked glycosylation;GO:0006486 protein glycosylation;GO:0043413 macromolecule glycosylation			Nucleus but not nucleoli;Vesicles			(M5945)HALLMARK HEME METABOLISM	0	0	0	0	0	0	0	0	0	0	0	0	0	0	0	0	0	0	0	1
TRAM1L1	133022	symbol	H. sapiens	133022	H. sapiens	TRAM1L1	translocation associated membrane protein 1-like 1	GO:0006613 cotranslational protein targeting to membrane;GO:0006612 protein targeting to membrane;GO:0090150 establishment of protein localization to membrane			Mitochondria				0	0	0	0	0	0	0	0	0	0	0	0	0	0	0	0	0	0	0	0
TRIM16	10626	symbol	H. sapiens	10626	H. sapiens	TRIM16	tripartite motif containing 16	GO:0050718 positive regulation of interleukin-1 beta secretion;GO:0048386 positive regulation of retinoic acid receptor signaling pathway;GO:0050716 positive regulation of interleukin-1 secretion							0	0	0	0	0	0	0	0	0	0	0	0	0	0	0	1	0	0	0	0
TRIM25	7706	symbol	H. sapiens	7706	H. sapiens	TRIM25	tripartite motif containing 25	GO:1902187 negative regulation of viral release from host cell;GO:0046597 negative regulation of viral entry into host cell;GO:1902186 regulation of viral release from host cell		Enzymes/ENZYME proteins/{Ligase,Transferases}	Nucleus but not nucleoli			(M5911)HALLMARK INTERFERON ALPHA RESPONSE; (M5913)HALLMARK INTERFERON GAMMA RESPONSE	1	0	0	0	1	0	0	0	0	0	0	0	0	0	0	1	1	0	0	0
TRIM27	5987	symbol	H. sapiens	5987	H. sapiens	TRIM27	tripartite motif containing 27	GO:1902187 negative regulation of viral release from host cell;GO:0051127 positive regulation of actin nucleation;GO:1900041 negative regulation of interleukin-2 secretion			Nucleoli				0	0	0	0	0	0	0	0	0	0	0	0	0	0	0	1	1	0	0	0
TRIM59	286827	symbol	H. sapiens	286827	H. sapiens	TRIM59	tripartite motif containing 59	GO:0046597 negative regulation of viral entry into host cell;GO:0046596 regulation of viral entry into host cell;GO:0046718 viral entry into host cell					(M200)PID ERA GENOMIC PATHWAY		0	0	0	0	0	0	0	0	0	0	0	0	0	0	0	0	1	0	0	0
TRIM72	493829	symbol	H. sapiens	493829	H. sapiens	TRIM72	tripartite motif containing 72	GO:0046627 negative regulation of insulin receptor signaling pathway;GO:0043569 negative regulation of insulin-like growth factor receptor signaling pathway;GO:0010832 negative regulation of myotube differentiation		Transporters/Transporter channels and pores	Nucleus;Nucleoli				0	0	0	0	0	0	0	0	0	0	0	0	0	0	0	0	0	0	0	0
TRMT10A	93587	symbol	H. sapiens	93587	H. sapiens	TRMT10A	tRNA methyltransferase 10A	GO:0030488 tRNA methylation;GO:0006400 tRNA modification;GO:0001510 RNA methylation			Nucleoli;Nucleus but not nucleoli;Cytoplasm;Cytoskeleton (Actin filaments)				0	0	0	1	0	0	0	0	0	0	0	0	0	0	0	0	0	0	0	0
TRMT44	152992	symbol	H. sapiens	152992	H. sapiens	TRMT44	tRNA methyltransferase 44 homolog (S. cerevisiae)	GO:0030488 tRNA methylation;GO:0006400 tRNA modification;GO:0001510 RNA methylation		Enzymes/ENZYME proteins/Transferases	Nucleus but not nucleoli				0	0	0	1	0	0	0	0	0	0	0	0	0	0	0	0	0	0	0	0
TRMT5	57570	symbol	H. sapiens	57570	H. sapiens	TRMT5	tRNA methyltransferase 5	GO:0070901 mitochondrial tRNA methylation;GO:0070900 mitochondrial tRNA modification;GO:0090646 mitochondrial tRNA processing		Enzymes/ENZYME proteins/Transferases	Nucleus;Nucleoli				0	0	0	1	0	0	0	0	0	0	0	0	0	0	0	0	0	0	0	0
TRMT61A	115708	symbol	H. sapiens	115708	H. sapiens	TRMT61A	tRNA methyltransferase 61A	GO:0030488 tRNA methylation;GO:0006400 tRNA modification;GO:0001510 RNA methylation		Enzymes/ENZYME proteins/Transferases					0	0	0	1	0	0	0	0	0	0	0	0	0	0	0	0	0	0	0	0
TSNAX	7257	symbol	H. sapiens	7257	H. sapiens	TSNAX	translin associated factor X	GO:0031047 gene silencing by RNA;GO:0007283 spermatogenesis;GO:0048232 male gamete generation			Nucleus				0	0	0	0	0	0	0	0	0	0	0	0	0	0	0	0	0	0	0	0
TSPAN17	26262	symbol	H. sapiens	26262	H. sapiens	TSPAN17	tetraspanin 17	GO:0045747 positive regulation of Notch signaling pathway;GO:0090002 establishment of protein localization to plasma membrane;GO:0008593 regulation of Notch signaling pathway			Nucleus but not nucleoli				0	0	0	0	0	0	0	0	0	0	0	0	0	0	0	0	0	0	0	0
TSPAN18	90139	symbol	H. sapiens	90139	H. sapiens	TSPAN18	tetraspanin 18	GO:0007166 cell surface receptor signaling pathway;GO:0007165 signal transduction;GO:0044700 single organism signaling							0	0	0	0	0	0	0	0	0	0	0	0	0	0	0	0	0	0	0	0
TSPAN31	6302	symbol	H. sapiens	6302	H. sapiens	TSPAN31	tetraspanin 31	GO:0008284 positive regulation of cell proliferation;GO:0042127 regulation of cell proliferation;GO:0008283 cell proliferation			Nucleus but not nucleoli				0	0	0	0	0	0	0	0	0	0	0	0	0	0	0	0	0	0	0	0
TSPYL4	23270	symbol	H. sapiens	23270	H. sapiens	TSPYL4	TSPY like 4	GO:0006334 nucleosome assembly;GO:0031497 chromatin assembly;GO:0006323 DNA packaging							0	0	0	0	0	0	0	0	0	0	0	0	0	0	0	0	0	0	0	0
TSTD2	158427	symbol	H. sapiens	158427	H. sapiens	TSTD2	thiosulfate sulfurtransferase like domain containing 2	GO:0008150 biological_process			Nucleus but not nucleoli				0	0	0	0	0	0	0	0	0	0	0	0	0	0	0	0	0	0	0	0
TTC30A	92104	symbol	H. sapiens	92104	H. sapiens	TTC30A	tetratricopeptide repeat domain 30A	GO:0042073 intraciliary transport;GO:0098840 protein transport along microtubule;GO:0099118 microtubule-based protein transport							0	0	0	0	0	0	0	0	0	0	0	0	0	0	0	0	0	0	0	0
TTC30B	150737	symbol	H. sapiens	150737	H. sapiens	TTC30B	tetratricopeptide repeat domain 30B	GO:0042073 intraciliary transport;GO:0098840 protein transport along microtubule;GO:0099118 microtubule-based protein transport							0	0	0	0	0	0	0	0	0	0	0	0	0	0	0	0	0	0	0	0
TTC9C	283237	symbol	H. sapiens	283237	H. sapiens	TTC9C	tetratricopeptide repeat domain 9C	GO:0000413 protein peptidyl-prolyl isomerization;GO:0018208 peptidyl-proline modification;GO:0061077 chaperone-mediated protein folding							0	0	0	0	0	0	0	0	0	0	0	0	0	0	0	0	0	0	0	0
TTF2	8458	symbol	H. sapiens	8458	H. sapiens	TTF2	transcription termination factor 2	GO:0006369 termination of RNA polymerase II transcription;GO:0006353 DNA-templated transcription, termination;GO:0008380 RNA splicing			Cytoplasm				0	0	0	0	0	0	0	0	0	0	0	0	0	0	0	0	0	0	0	0
TTLL12	23170	symbol	H. sapiens	23170	H. sapiens	TTLL12	tubulin tyrosine ligase like 12	GO:0006464 cellular protein modification process;GO:0036211 protein modification process;GO:0043412 macromolecule modification			Cytoplasm				0	0	0	0	0	0	0	0	0	0	0	0	0	0	0	0	0	0	0	0
TTPA	7274	symbol	H. sapiens	7274	H. sapiens	TTPA	alpha tocopherol transfer protein	GO:0090212 negative regulation of establishment of blood-brain barrier;GO:0090210 regulation of establishment of blood-brain barrier;GO:0051452 intracellular pH reduction						(M5934)HALLMARK XENOBIOTIC METABOLISM	0	0	0	0	0	0	0	0	0	0	0	0	0	0	0	0	0	1	0	0
TUBE1	51175	symbol	H. sapiens	51175	H. sapiens	TUBE1	tubulin epsilon 1	GO:0007098 centrosome cycle;GO:0051297 centrosome organization;GO:0031023 microtubule organizing center organization				Vinblastine (Structural constituent of cytoskeleton)			0	0	0	0	0	0	0	0	0	0	0	0	0	0	0	0	0	0	0	0
TWISTNB	221830	symbol	H. sapiens	221830	H. sapiens	TWISTNB	TWIST neighbor	GO:0006363 termination of RNA polymerase I transcription;GO:0006362 transcription elongation from RNA polymerase I promoter;GO:0006361 transcription initiation from RNA polymerase I promoter		RNA polymerase related proteins	Nucleus;Nucleoli				0	0	0	0	0	0	0	0	0	0	1	0	0	0	0	0	0	0	0	0
TWSG1	57045	symbol	H. sapiens	57045	H. sapiens	TWSG1	twisted gastrulation BMP signaling modulator 1	GO:0030513 positive regulation of BMP signaling pathway;GO:0030514 negative regulation of BMP signaling pathway;GO:0045668 negative regulation of osteoblast differentiation			Centrosome			(M5947)HALLMARK IL2 STAT5 SIGNALING	0	0	0	0	0	0	0	0	0	0	0	0	0	0	0	0	0	0	0	0
TXNDC17	84817	symbol	H. sapiens	84817	H. sapiens	TXNDC17	thioredoxin domain containing 17	GO:0033209 tumor necrosis factor-mediated signaling pathway;GO:0098869 cellular oxidant detoxification;GO:1990748 cellular detoxification							0	0	0	0	1	0	0	0	0	0	0	1	0	0	0	0	0	0	0	0
TXNL4B	54957	symbol	H. sapiens	54957	H. sapiens	TXNL4B	thioredoxin like 4B	GO:0000245 spliceosomal complex assembly;GO:0000398 mRNA splicing, via spliceosome;GO:0000377 RNA splicing, via transesterification reactions with bulged adenosine as nucleophile			Nucleus but not nucleoli;Cytoplasm				0	0	0	1	0	0	0	0	0	0	0	0	0	0	0	0	0	0	0	0
TXNRD1	7296	symbol	H. sapiens	7296	H. sapiens	TXNRD1	thioredoxin reductase 1	GO:0015949 nucleobase-containing small molecule interconversion;GO:0001887 selenium compound metabolic process;GO:0001707 mesoderm formation		Enzymes/ENZYME proteins/Oxidoreductases	Nucleus	Arsenic trioxide (Thioredoxin-disulfide reductase activity);Nadph Dihydro-Nicotinamide-Adenine-Dinucleotidephosphate (Thioredoxin-disulfide reductase activity);Flavin adenine dinucleotide (Thioredoxin-disulfide reductase activity);Spermidine (Thioredoxin-disulfide reductase activity);Fotemustine (Thioredoxin-disulfide reductase activity);motexafin gadolinium (Thioredoxin-disulfide reductase activ…		(M5938)HALLMARK REACTIVE OXIGEN SPECIES PATHWAY; (M5924)HALLMARK MTORC1 SIGNALING	0	1	0	0	0	0	0	0	0	0	1	1	0	0	0	0	0	1	1	0
UAP1L1	91373	symbol	H. sapiens	91373	H. sapiens	UAP1L1	UDP-N-acetylglucosamine pyrophosphorylase 1 like 1	GO:0006048 UDP-N-acetylglucosamine biosynthetic process;GO:0006047 UDP-N-acetylglucosamine metabolic process;GO:0046349 amino sugar biosynthetic process			Cytoskeleton (Intermediate filaments)				0	0	0	0	0	0	0	0	0	0	0	0	0	0	0	0	0	0	0	1
[truncated: 53 more rows]

## Sheet: Enrichment
GroupID	Category	Term	Description	LogP	Log(q-value)	InTerm_InList	Genes	Symbols
[truncated: 200 more rows]

## Sheet: README
These tables represent the output of Metascape (http://www.metascape.org/) run with the default settings for the list of genes with strictly conserved 3' UTRs.
