# Supplementary material for: A massively parallel 3′ UTR reporter assay reveals relationships between nucleotide content, sequence conservation, and mRNA destabilization
Source: HighWire-hosted journal article supplement (doi:10.1101/gr.242552.118), 2019-05-31
Supplement: Supplemental_Table_5.xlsx [file Supplemental_Table_5.xlsx]

## Sheet: Supplemental_Table_5
gene	Strictly_Conserved	Rapidly_Evolving	Essential	NotEssential	3utr	gc	length
A1BG	FALSE	TRUE	FALSE	TRUE	TGCAGCCGCGGGCCCAGGGTGCTGTTGGTGTCCTCAGAAGTGCCGGGGATTCTGGACTGGCTCCCTCCCCTCCTGTTGCAGCACAAGGCCGGGGTCTCTGGGGGGCTGGAGAAGCCTCCCTCATTCCTCCCAGGAATTAATAAATGTGAAGAGAGGCTCTGTTTAAAATGTC	0.587209	172
A1CF	FALSE	FALSE	FALSE	TRUE	AGATGCTTTTTTAAATTTAAGAATAAGACACACAAAACTCTATTAAAAAAAAAAAAGAAATAAACCTCTAACTCGGTCCCCAATGATCATAAATAATATGTTTCCTAAAGAAATGCCTTTCCAGAGACTGTATAGCTTATACCAATTATAGAATCATGAAGTAAGAACGTTATTCTGAAATGAAATCAAATGTTAAAGAGCCTTTTGTTTAACAGAAAGCTGGAGAGCCACTGCCCCAAAAGTTGTTCTTCCAGTCTTCCTGAGTGTTTGGGGAGTATGTTTACAAATCCTGCCAGGGTGAAGAGAGATCTTGTAGCTGGCAAGATTTGGGAGGGATGGAGCAGACCTGGGCAGTCAGTAATAATCAAGGGAAGCCAAGTAAACTCCAGAGTCTTACCT…	0.341667	7320
A2M	FALSE	FALSE	FALSE	TRUE	ATGACCAGGACAATGAAGACTGCATCAATCGTCATAATGTCTATATTAATGGAATCACATATACTCCAGTATCAAGTACAAATGAAAAGGATATGTACAGCTTCCTAGAGGACATGGGCTTAAAGGCATTCACCAACTCAAAGATTCGTAAACCCAAAATGTGTCCACAGCTTCAACAGTATGAAATGCATGGACCTGAAGGTCTACGTGTAGGTTTTTATGAGTCAGATGTAATGGGAAGAGGCCATGCACGCCTGGTGCATGTTGAAGAGCCTCACACGGAGACCGTACGAAAGTACTTCCCTGAGACATGGATCTGGGATTTGGTGGTGGTAAACTCAGCAGGTGTGGCTGAGGTAGGAGTAACAGTC	0.442049	371
A2ML1	FALSE	FALSE	FALSE	TRUE	GGATAGGAGCTGGAAACTCAATTAGTCCTCTGTGACATTTACTGGAGGGTGGAACATTCTTCTGTCGCTTGAAGCAGAACTCATTCAATCAAATAATTTAATTTCTCTGACTAGTATATGGGTAACAAATGAATATGTCTGAACCTCAGCTATAATACTTTCTACTACCTTTGCAAGGAGATGGGATAGGAACAATCACTCAGAGGAGGCGTTGCATGGGCAGGGTCATAGGGGGAAGAAAGGTGGTTTAGCTGTTTTATTTAGCCATTCAGGGGGCTCTCCAGAGAGGAGACGGTGGTAGAGGGTGAACTAGAGAAGATAAGAATGTCTTCCTAGGCCGGATGCGGTGGCTCACGCCTGTAATCCCAGCACTTTGGGATTGCGAGGTGGGCGGATCAC…	0.452675	729
A4GALT	FALSE	FALSE	FALSE	TRUE	GGGGCCCGCCAGGTCACCTCCCCAACCTGCTCCTGATGGGGCACTGGGCCGCCCTTCCCGGGGAGGCAAGATTGAGGGCCCGGGAGAGGGAGGCCCGAGCTGCCACCGGGCTTAGGCAGGCTGTTGAGGAGCTGTGGGAGCAGGCCCAGTGGGAGGCTGTGGACACCCCGAGGACAGTGTCCTGTCTCGAGGCAGGGCTGACACATGGTGCCATAGCCAGCGGAGGGCGCTCAGTGAGTGCCCCGGGCCTTCTAGACAACAGGCAGGAAGGATGAACCTCAGGGCACCCCCAGGTGGTGCGGAAAGCCAGGCAGTTGGGACAGAGGTGCCCACGAGGGCAGAGGCCGGTGCTAAGGGGATGGGGAAGAAGGGACAAGATTCCCAGAGAGGAGAGGAGGC…	0.632391	778
A4GNT	FALSE	FALSE	FALSE	TRUE	AGCTAACACTCGTTTGCTGCTGCTGCAGTGTGGAAATGGACATTTCCTGGAGTGCCACATTTTCACTTGATCTCCACTGTCTCTTGGCGGGGTGGGCAGAGGGTTGCCTCTCAAATGTCAGTTAGGATTAGCTTTCTCTGTCTGTAATAGAAAAATCCCAAATGATACTGGCTATAAAACATACACCCATGGTCCATTTGACTGCTTGACCTCCAACCCACCATGTTTGCATTTCAGGCAGTAGGATGAAGAAAAGAGGAAAGGTGCACTTGCTTTATTTTGTGAAGACTTCCTGCAAGTACCGTATAACACTTTCTCTTACATTGCACTGACTGAGATGTAGCTGCAAGAGAGGCTGGGAAGTTTAAGGAGGAAGAAAAAATGGGTACTGGGATAGGC…	0.413919	546
AAAS	FALSE	FALSE	FALSE	TRUE	GAATAAATAAGTTTTCCTTTTGTTTTCCACTCA	0.272727	33
AACS	FALSE	FALSE	FALSE	TRUE	GTCAGACTGGCTGGCGTGTCACTCAGCCGCACCCGTGTGCACTGTAACTTTTGTGTGCTCAAGAAATTATACAGAAACCTACAGCTGTTGTAAAAGGATGCTCGCACCAAGTGTTCTGTAGGCTTGGGGAGGGATCGTTTCTCTGTTTTGTTAAATCTGGTGGGTACCTGGATCTTCCACACGAGTGGGATTCTGGCCTTCAGAGACCAGGAGGGAGTGTCTGGGCCGCAGGTGTGGCACTGTGGTGAGAGTGTGTGTCTTTGCACACACAGTGCAGCGGGAACGGTGGGGCTGGCTGGTGCTGAAGACAGACACACTCCTGAGCCAAGGTCTTGTCTTCAACCTCCCCGTCCCGTTGTCCCATTTTGCTCTGTGAAGGTGCAAATCCCTTTCTTCCCT…	0.507791	1091
AADAC	FALSE	FALSE	FALSE	TRUE	TAAAACATGTAGCTATAACATATTTTAAAAATAAAATCTGAAAACCTCAGAAAATTTGCATTAGAAATTGGTCTTTCTTAGAATGGTCTAGTTAAGTTCCACATGTAGCATAATTCTTAAATAGGCACTTTTCTGTTTTTTTTTTCTTACTGTGGGATTTCATTTCAATTTTCTACATTGTCTATCTGCTTTTTCTGAGATTTTCCTTCTTACACTGTTAATCTTATTTTAAAAAATATTACATTCTTGTATACTTTATTTTTGTGAGTTGGCTACTATTTACGATGCAAGAGAATAAATGTGAGCAAATATTGCC	0.272152	316
AADACL2	FALSE	FALSE	FALSE	TRUE	ATAGATGGACGGCAAACACGCTTGATGCTGTTGTTGTAGGCGTGGACTATAGGCTGGCTCCTCAACACCACTTTCCTGCTCAGTTTGAAGATGGCCTTGCTGCAGTCAAATTTTTTCTTTTGGAAAAAATTCTTACAAAATATGGAGTGGATCCCACCCGAATCTGCATTGCGGGAGACAGTTCTGGGGGCAATTTAGCAACAGCGGTCACTCAACAGGTGCAGAATGATGCTGAAATAAAACATAAAATCAAGATGCAAGTCTTACTTTACCCTGGCTTACAGATAACAGATTCTTATTTGCCATCTCACCGAGAAAATGAGCATGGTATAGTTTTGACCAGGGATGTAGCCATAAAACTCGTGAGCTTATATTTCACCAAGGATGAAGCACTTCCCT…	0.34297	4566
AADACL3	FALSE	FALSE	FALSE	TRUE	CCATCTTTCTTCTCTGCTGGTACTGCGGTGTGGATTCCACTGGCATCCAGCCTCCCACAGGGCTCTCTGTTGCTGATTTAGGTGGTGCATAGTGGGGCTAGGGAGGGGGTAGAGGTTGCTGTCACCTTTCTGGTCCAGGTTCTAGAACCACACAATGCATGCTCCTGATGTCCAGAGGACGTGGTAGAAAAGACAGGTTTGGAGGTGGGAGTGTGGCTGTCTCTATTCTCTGTTGGGAAAACCTGGGCTGACAATATTCAGTGGCCATTTGTGGGAGTGAATCAGCCGGTAAGAGCTGTTCTCAGCCTCCCTAAGGGGCAGTTCAGGCTCCCAGATTGATCCAGACTGTGTGTGACTTTCGTCCATTTGACTTGACTTTGGAATAGCACAAGGGCATCA…	0.487105	2404
AADACL4	FALSE	FALSE	FALSE	TRUE	TAGTAACCCTGGGGCCCCGAGGAGGAAGGGGCAAGTATGGACTCTACCAGAAACCGGGTGCTTTAGTGAGTTCTATTTTATTGACTAAAGAGGTGCTACATCAATGCTTGGGGCAGCTGGGAAGGGTGAGAAGTAAGCTAACAGTCTTGCTTAGTATTCAAGAAAATCCAAACTGTGTCTGTTTCCTTCCAGCACTAACAATGTCCATTGCTGGATCTAGCGACATTCTCTAACATTCCCATTTAGGTGAAATAAATATCAAAAGGAGAAAAAAATGCCTTTAAAAATTTCTCAAAGCCCCAACATATAAGATCTGTGCAGAATAAATGCCAACAACTGGTCATACCGTCA	0.418803	351
AADAT	FALSE	FALSE	FALSE	TRUE	AGAAATTAAACTAGGTTGGGCATGGTGGCTCACACCTATAATCCCAGCACTTTGGGAGGCAGAGGAGGGAGGATCACTTGAACCCAGGAATTCAAGGCTGCAGTAAGCTACGATCACACCACTGCACTCTGGCCTGCATGCACTCTGGCCTGCATGGCAGAACAAGACCCTGTCTCTAAAAAAAGAGAAAGAAATCAAACTAATCATGCTGCTCATGGATTTTTCCAATAAATTTCTTGTTTTGGCAGGAAGAAATGAACACTGGTATTAGACTTAAAGATTAAATTTCCTCAAACATGTCCTATCTGTAGTAGTTCAACTAGACACCTTTTAAAGTGCCTCTAAATTCATCAGATGGCCAAACTGTATTTATAATCCACTTAGGCATTTTGAAAAACT…	0.335694	706
AAED1	FALSE	FALSE	FALSE	TRUE	CTTAAAATGCACTCAGTCACTTTCAACTGGACCTTCTGGAATGTGACCTTCAATGCCTGGGTGTAATATCCTCGTGCAGTGTCTAACCTGCTGTCCCTTCCCAGCCTTTGAGGAGTTAGGGAAGCATAAAGGGGGCTTGAACCTGTTGAATTGCATGCTGGGAAGCATCAGTTGTCAAAATATGTTATATACTTCCATTTTATAACTTTTAACATTTTATACAAAAAAAATGAATATACAAAATATAACTTTAAAAGCTATAAAATCATAAATACTCTAAATTATTTTACATTATGGTATATTCAGTCAATGAAAGAGTTTTTTGGCAATATAAATTCTGACAGTATATAAGGGGACAGGAGAACAACACAAGACCATTATATTCAGTGAAGAAGGCAA…	0.399175	2182
AAGAB	FALSE	FALSE	FALSE	TRUE	ATTATTCATACTAGGGTTTGACCAACAAAGATGCTAGCTGTCTCTGAGATACCTCTCTACTCAGCCCAGTCATATTTTGCCAAAATTGCCCTTATCATGTTGGCTGCCTGACTTGTTTATAGGGTCCCCTTAATTTTAGTTTTTAGTAGGAGGTTAAGGAGAAATCTTTTTTTTCCTCAGTATATTGTAAGAGAGTGAGGAATACAGTGATAGTAATGAGTGAGGATTTCTTAAATATACTTTTTTTTTGTTCTAGGAATGAGGGTAGGATAAATCTCAGAGGTCTGTGTGATTTACTCAAGTTGAAGACAACCTCCAGGCCATTCCTGGTCAACCTTTTAAGTAGCATTTCCAGCATTCACACTTGATACTGCACATCAGGAGTTGTGTCACCTTTCC…	0.423378	1788
AAK1	FALSE	FALSE	FALSE	TRUE	CCGTGACCCAGTAGCAGATGCAGTTCTGTAACCTTCATACCGTAAAATACATTTTCATTACGGAGTTATGAAAAAAATGATTTTTTTAAAAAAATCTGCAAATAAGGGGCCCTCCAGCCCTTTTCTCCTACCCCTTGCCTTCTCCTGTAGAAATGATAAGGAAAGAAAATCACTTTGGCCCTCCAGATATTCCTTGGCCAGTTCCTCCTTGTTAGTTTGCTGTGTTTTCTCATTACCCTTCTTCAATAGCATTATCTTAAATCAAGCACTAGATGCCATGAGCTTCACCTCTGCTGGAATCAACTCCACCAAAAGCTTAACTGTAACTGAAACTAGTGAATTGACACTTTTGTCTCGTTCTTGCTAGGAATGGCCTCCCAGATCAATTCTCCCAACCCC…	0.378867	8082
AAMDC	FALSE	FALSE	FALSE	TRUE	GCAGAGGCTGCTTGATGCAGAAGATGAAGACAGAAGAAAGAATGAGCCTAGGCCGGGCACAGTGGCTCACGCCTGTAATTCCAGCACTTTGGGAGGCCGAGGCGGGAGGATCACTTGAGCTCAGGAGTTTGAGACCAGCCTGGCCACCATGGTGAAACCTCGACTCTACAAAAAAAAAAAAGCCAAAATTAGCCAGGTGTGGTGGCATATGCCTGTGGTCCCAGCTACTTGGGAGGCTGAAGTGGGAGAATCACTTGCAGTGAGCTGATATTATGCCACTGCACTCCAGCCTGGGTGACAGGGTGAGACCCTGTCTCAAAAAAAAAAAAAAAA	0.510511	333
AAMP	FALSE	FALSE	TRUE	FALSE	TGGCTGCAGCCCCTGCCTGTGTGTCTGGTGTTGAGGGGACGAAGGGACCCCTGCCCCTGTCTGCCAGCAGAGGCAGTAGGGCACAGAGGGAAGAGGAGGGTGGGGCCCTGGATGACTTTCCAGCCTCTTCAACTGACTTGCTCCCCTCTCCTTTTCTTCTCTTTAGAGACCCAGCCCAGGGCCCTCCCACCCTTGTCCAGACCTGGTGGGCCCTTCAGAGGGAGGGGTGGACCTGTTTCTCTTTCACTTTCATTTGCTGGTGTGAGCCATGGGGTGTGTATTTGTATGTGGGGAGTAGGTGTTTGAGGTTCCCGTTCTTTCCCTTCCCAAGTCTCTGGGGGTGGAAAGGAGGAAGAGATACTAGTTAAAGATTTTAAAAATGTAAATAAAATATACTTC…	0.536585	410
AANAT	FALSE	FALSE	FALSE	TRUE	CCCTATGTCCAGAGCTGTCCCTGGGCTGGTTCGAGGAGGGCTGCCTTGTGGCCTTCATCATCGGCTCGCTCTGGGACAAGGAGAGACTCATGCAGGAGTCACTGACGCTGCACAGGTCTGGGGGCCACATAGCCCACCTGCATGTGCTGGCCGTGCACCGCGCCTTCCGGCAGCAGGGCAGGGGCCCCATCCTGCTGTGGCGCTACCTGCACCACCTGGGCAGCCAGCCGGCCGTGCGCCGGGCCGCGCTCATGTGCGAGGACGCGCTGGTACCCTTCTATGAGAGGTTCAGCTTCCACGCCGTGGGCCCCTGCGCCATCACCGTGGGCTCCCTCACCTTCATGGAGCTCCACTGCTCCCTGCGGGGCCACCCCTTCCTGCGCAGGAACAGCGGCTGCT…	0.671296	432
AAR2	FALSE	FALSE	FALSE	TRUE	CTCGGGGAGCGCTCTCAGCTGCGAGGGGCCCCTTCCCACAGGGCTGCAGTCCTGGCCTCTCCATTTACTTCTTCCCATCCTGGGACCTGCCAGGGCAGCAATCTCTCCAGGTCCTGCAAAGATGGAGCCAGAATTCCCTTTTTCACTGATAAATATATTTCTTCATTGCCAAAGAGGCTGTACCCATCCTGAAGGCACATTTGTGGGTTCCCCATCAGCCAGGCCTTGGTGCTAACCTGGCTGAATTTCACACAGGCTCTTACACACACACGCTCCTAGGAGACATCTGCCTACACGGCAACCATATTTCCTCTGAATGAGAAGGAATTGAACCAAAAGTCCAAGAAAGAACTGATTGCTTGTTCCATAGGAGCTTAGGAAACAAGAAACCCTGGATTG…	0.520202	1188
AARD	FALSE	FALSE	FALSE	TRUE	AGAAATGCACACGCAAGGGCTGGGCGCGGTGGCTCACGCCTGTAATCCCAGCACTTTGGGAGGCCGAGGCGGGCGGATCAAGACGTCAGGAGATTGAGACCATCCTGGCTAACACTGTGAAACCCTGCCTCTACTAAAAATACAAAAAATTAGCCAGACGTGGTGGCAGGCACCTGTAGTCCCTGCTACTCAGGAGTCTGAGGCAGGAGAATGGCGTGAACCCAGGAGACAGAGCTTGCAGTGAGCCGAAATCCTGCCACTGCACTCCAGCCTGGGTGACAGAGCAAGACTCCATCTCAAAAAAAAAAAAAAAAAAAAAAGCACACGCGAAGCTCTGGATCCTAAAACTAACGCATACAACCCTGAAACAATTCTGATGAACACATTATGCTTTGCATA…	0.423292	1786
AARS	FALSE	FALSE	TRUE	FALSE	GTGGGGAAGGAGGAGGCTCCCACTGGATCCATCCGTCCAGCCAAGAGCTCTTCATCTGCTACAAGAACATTTGAATCTTGGGACCTTTAAAGAGCCCCTCCTAACCCAGCAGTAACTGGAACACACTTGGGAGCAGTCCTATGTCTCAGTGCCCCTTAAATTTCTGCCCTGAGCCCTCCACGTCAGTGCCATCGGTCTAGAACCACTAACCCCGCATTGCTGTTGATCGTCACGCTCGCATCTATAGATAACGGCTCTCCAGACCTGAGCTTTCCGCGTCAGCAAGTAGGAATCGTTTTTGCTGCAGAGAATAAAAGGACCACGTGCAATACTTAATGCCGCATGATCTCTATCCCTCTTCCCAATAGGGGCTGGCTCTTTTGACAGCCTTTGGCGTCT…	0.514085	426
AARS2	FALSE	TRUE	TRUE	FALSE	CCCAGGTCCGCCCAGGGACCCACATGGACTAAAGGCAATGCCAGGAGCCCTGAAGGAGCCAGCAGAACCTTCCCACATGCTGAAGCGAGGACTAGAGGCTGGAGGCCAAGCAGCTGAGCCAAAGAAGATCACCTGGGCCAGGGCCTACGTGACACAAGGAGACATGGGCTAGGGAAGGCAGAACTGGGCCCAAAGACACACACCCCCTTGGTGAAAGAGAAGACATGGACAATTATGGCTGTGACTGCACATTAGAAATTATTTCACTGGCCGGGTGTGGTGGTTCACACCTGTAATCCAAGCACTTTGGGAGGCCGAGGCAGGTAGATCATGAGGTCAGGAGATCAAAACCATCCTGGCTAACATGGTGAAACCCCATCTCTACTAAAAATACAAAAA…	0.513998	893
AARSD1	FALSE	FALSE	FALSE	TRUE	GACTACAGCCTGATGACCGTGGTACAATCAATGACATCTCTGTGCTGAGAGTGACTCGCCGTGGGGAACAGGCTGATCATTTCACCCAGACACCCCTGGATCCAGGAAGCCAGGTTCTGGTCCGGGTAGATTGGGAGCGGAGGTTTGACCACATGCAGCAGCATTCAGGGCAGCATCTCATCACGGCAGTTGCTGACCATCTATTTAAGCTGAAGACAACATCATGAGCAAGTAGCTGCCATTGAGCAGAGCGTCAATGAAAAAATCAGAGATCGGCTGCCTGTGAATGTCCGAGAACTGAGCCTGGATGATCCTGAGGTGGAGCAGGTGAGTGGCCGGGGTTTGCCTGATGATCATGCTGGGCCCATTCGGGTTGTTAACATCGAGGGCGTTGATTCC…	0.521561	487
AASDH	FALSE	FALSE	FALSE	TRUE	ACTATGATACATTTACAGTGGAACATAATGACCTAGTGCTCTTCAGACTTCACTGGAAAAATACTGAGGTGAACTTGATGCTAAATGATGGAAAAGAGAAATATGAAAAAGAAAAAATAAAAAGCATAAGTTCTGAGCATGTCAATGAAGAAAAAGCAGAAGAACACATGGATCTGAGGCTAAAGCATTGCTTAGCCTATGTTCTACATACATCAGGGACTACAGGGATACCGAAGATTGTCAGAGTGCCTCATAAGTGTATAGTACCAAATATCCAGCATTTTCGGGTACTTTTTGACATCACACAAGAAGATGTTTTGTTTCTGGCTTCACCTCTGACCTTCGATCCTTCTGTTGTGGAAATATTTCTTGCTCTATCAAGTGGTGCCTCTCTGCTTA…	0.400706	2548
AASDHPPT	FALSE	FALSE	TRUE	FALSE	TGATTCCCTGAGTAACAAAGGGAAATGAAAACTGTTTGTGATCTTCCGTATTCACTGAAAAATAAATGCTTGTTTAGTATCAAATTTTATTTCACGAAAGTTTTTTTAAAGAACAGAAACTTTTCCAATTAAAAAAAAAAAGCAGACTTCTGGTTCAAGATAGCTCACTGGAATACATGTTTACCTCTTTCTTTCCTAAATTGCATTGAATTGATAGGAAGGATGGCGGAATCTTAAAGTGATACATGCTAACTGTAGAAAAAAATAGAAAATGCACATAAGCAAAAGGAAACATTTAAATGCTATCTTTCAAAGATAACTACTCTTAAAACCTTGAGTATCTTTTCAGACCTTTTTCTTGGCAAATGAATCCATATTGACATATTTGATTTTTTTAAA…	0.321686	1803
AASS	FALSE	FALSE	FALSE	TRUE	AGAATCAAATTGAACAGTTAGGCAAGAAATATAATATTAATCCTGTTAGCATGGACATTTGTAAACAAGAAGAGAAGCTGGGCTTCTTGGTGGCAAAACAGGATCTTGTCATCAGCTTGTTGCCTTATGTATTGCACCCTCTTGTGGCCAAGGCCTGCATCACAAACAAAGTTAACATGGTCACTGCAAGCTACATCACACCAGCACTAAAAGAATTGGAAAAGAGTGTGGAAGATGCTGGCATCACAATCATTGGTGAATTGGGATTGGACCCTGGTCTGGATCACATGTTAGCAATGGAAACAATAGATAAAGCCAAGGAAGTGGGAGCCACGATTGAATCATATATTTCCTACTGTGGTGGGCTTCCAGCCCCTGAACATTCAAACAATCCATTGA…	0.413974	1331
AATF	FALSE	FALSE	TRUE	FALSE	CCACCAACCAGCTTCCTCAACCAGATGTTTTCCCATTGTTCAAGGACAAAGGTGGCCCAGAATTTTCCAGTGCCCTGAAAAATAGTCACAAGGCACTTAAAGCATTGTTGAGGTCATTGGTAGGTCTTCAGGAAGAGTTGCTTTTCCAGTACCCAGACACTAGATATCTAGTAGATGGGACAAAGCCCAATGCGGGAAGTGAGGAGATTTCTAGTGAAGATGATGAGCTGGTAGAAGAGAAGAAGCAGCAACGAAGAAGGGTCCCTGCAAAGAGGAAGCTGGAGATGGAGGACTATCCCAGCTTCATGGCAAAGCGCTTTGCCGACTTTACAGTCTACAGGAACCGCACACTTCAGAAATGGCACGATAAGAC	0.474531	373
AATK	FALSE	FALSE	FALSE	TRUE	GGCCGAGGCCACCTCAGGCCCAGAGAAGAAGTGCGGCGGGGACCGAGCCCCCGGGCCAGAGCTGGGCCTGCCGAGCACTGGGCAGCCGTCTGAGCAGGTCTGTCTCAGGCCTGGGGTTTCCGGGGAGGCACAAGGCTCTGGCCCCGGGGAGGTGCTGCCCCCACTGCTGCAGCTTGAAGGGTCCTCCCCAGAGCCCAGCACCTGCCCCTCGGGCCTGGTCCCAGAGCCTCCGGAGCCCCAAGGCCCAGCCAAGGTGCGGCCTGGGCCCAGCCCCAGCTGCTCCCAGTTTTTCCTGCTGACCCCGGTTCCGCTGAGATCAGAAGGCAACAGCTCTGAGTTCCAGGGGCCCCCAGGACTGTTGTCAGGGCCGGCCCCACAAAAGCGGATGGGGGGCCCAGG…	0.650586	2218
ABAT	FALSE	FALSE	FALSE	TRUE	AGAAGCCATTTCCACTACAGTGAGAAAGCCCGGATCCCAACAGTTGTCAAATTGATTAGTTTGCCTAATTCATGTTTTCACTTAAAAGTATCAGAGGTGAATGCACAGTGAAGGGTGATTTGTGGGGAGGGAGCATTTTTGGTGGTCTTGGGGGAGGGGAGGGGAGGGAAGGGCTGGTGTTGATTTTCCTCCCTGCAGAGCCAATGGTGCACATTGGTTTAAGCCCAGAGATCCTGCTTGAGCCCTGGACTCATCTTGGGAAGGGCCATGGGAGGTCCTGGCTAGAGTTCTGCCCAACCTTGACCAACCCCAGCAATTTTTCCAAAAGCCAGTCAAGGGCATTACATTTGTTCCTGGGACTGGCAGCTGGGCCTCCTGGGTGCCAGTCCATCTCAAGTG…	0.464547	3145
ABCA1	TRUE	FALSE	FALSE	TRUE	AGAATCCTGTTCATACGGGGTGGCTGAAAGTAAAGAGGAACTAGACTTTCCTTTGCACCATGTGAAGTGTTGTGGAGAAAAGAGCCAGAAGTTGATGTGGGAAGAAGTAAACTGGATACTGTACTGATACTATTCAATGCAATGCAATTCAATGCAATGAAAACAAAATTCCATTACAGGGGCAGTGCCTTTGTAGCCTATGTCTTGTATGGCTCTCAAGTGAAAGACTTGAATTTAGTTTTTTACCTATACCTATGTGAAACTCTATTATGGAACCCAATGGACATATGGGTTTGAACTCACACTTTTTTTTTTTTTTTTGTTCCTGTGTATTCTCATTGGGGTTGCAACAATAATTCATCAAGTAATCATGGCCAGCGATTATTGATCAAAATCAAA…	0.340779	3313
ABCA10	FALSE	FALSE	FALSE	TRUE	GGAGTGTCTCTGCCCGACCGCCACCCTGTCTGGGAGATGAGGAGCGTCTCTGCCCGGCCGCCCCGTCTGAGAAGCATATTTTTTGACATATATGAAGGACAGATCACTGCAATACTTGGGCATAATGGAGCTGGTAAATCAACACTGCTAAACATTCTTAGTGGATTGTCTGTTTCTACAGAAGGATCAGCCACTATTTATAATACTCAACTCTCTGAAATAACTGACATGGAAGAAATTAGAAAGAATATTGGATTTTGTCCACAGTTCAATTTTCAATTTGACTTCCTCACTGTGAGAGAAAACCTCAGGGTATTTGCTAAAATAAAAGGGATTCAGCCAAAGGAAGTGGAACAAGAGGTAAAAAGAATTATAATGGAATTAGACATGCAAAGCATT…	0.382279	4379
ABCA12	FALSE	FALSE	FALSE	TRUE	CACTTCCAGCAAACTCAATCTCAGCGTGTGACCAATGGCTTCATTTTGAAGAAAAGCCACAGAAGATACACTTCCGCAAGATATCTTCATTTTAAAGTAAAGTAATATACTGTATGGAAAGTTACAACTGTGTTAGACTAACAAGTAATTATAAAAGGAAATTTTTCCTTCTAAGGTCAGTGAGTGTTGTTGCTACTGAAATGAATTCCTGTATACTCAACACTGTGAGCATGCTAATGTATATGCTGGTGATTCTTATGCAAAGGTGAAGCCACCTCAAGATGAATATCTTAATTTATTACTTTCAATAAAAAGACAGTTTAAAAGGCATGGATTTTGGTAGTTGAAATATAAGAGTGGAGAAGAAAAGTCAGATGGTTTGTGGCAGGTGCCACCGGG…	0.406593	1092
ABCA13	FALSE	FALSE	FALSE	TRUE	AGCATGCTGCTGGGGCAGGATTCCCACAGACACTTCCTTGGAGAAGATGGTGTGTTCAGTCTTGTCTAGCACATCAGAGGATGAAGCTGAGAAATGGGGCCACGTTGGAGGCTGCCACCCTAAGTGGTCAGAAGCCAAAAACTATCTTGTCCATGCAGTCAGCTGGCTGCGAGTCTACCAACAGGTGTTTGTTCAGTGGCAACAGGGTAGCCTGCTTCAGAAGACACTCACAGGCATGGGCCATAGTCTGGAGGCTCTCAGGAATCAGTTTGAAGAAGAGAGCAAGCCCTGGAAGGTGGTGGAAGCTCTGCACACTGCACTGCTCCTGCTGAATGACAGCTTGTCAGCAGATGGCCCAAAAGATAATCATACATTTCCAAAGATGTTCTTTCTGGTTCC…	0.405808	2548
ABCA2	FALSE	FALSE	FALSE	TRUE	GGAGACCCGTGGCATGGAGGAGGAGCCCACCCACCTGCCTCTGGTTGTCTGCGTGGACAAACTCACCAAGGTCTACAAGGACGACAAGAAGCTGGCCCTGAACAAGCTGAGCCTGAACCTCTACGAGAACCAGGTGGTCTCCTTCTTGGGCCACAACGGGGCGGGCAAGACCACCACCATGTCCATCCTGACCGGCCTGTTCCCTCCAACGTCGGGTTCCGCCACCATCTACGGGCACGACATCCGCACGGAGATGGATGAGATCCGCAAGAACCTGGGCATGTGCCCGCAGCACAATGTGCTCTTTGACCGGCTCACGGTGGAGGAACACCTCTGGTTCTACTCACGGCTCAAGAGCATGGCTCAGGAGGAGATCCGCAGAGAGATGGACAAGATGAT…	0.634117	5018
ABCA3	FALSE	FALSE	FALSE	TRUE	GGGGTGGCGGCTGTCTCGCCATCAGGCAGGGACAGGACGGGCAAGCAGGGCCCATCTTACATCCTCTCTCTCCAAGTTTATCTCATCCTTTATTTTTAATCACTTTTTTCTATGATGGATATGAAAAATTCAAGGCAGTATGCACAGAATGGACGAGTGCAGCCCAGCCCTCATGCCCAGGATCAGCATGCGCATCTCCATGTCTGCATACTCTGGAGTTCACTTTCCCAGAGCTGGGGCAGGCCGGGCAGTCTGCGGGCAAGCTCCGGGGTCTCTGGGTGGAGAGCTGACCCAGGAAGGGCTGCAGCTGAGCTGGGGGTTGAATTTCTCCAGGCACTCCCTGGAGAGAGGACCCAGTGACTTGTCCAAGTTTACACACGACACTAATCTCCCCTGGGG…	0.581337	793
ABCA4	FALSE	TRUE	FALSE	TRUE	TCTTTCACACCGCTCGTTCCTGCAGCCAGAAAGGAACTCTGGGCAGCTGGAGGCGCAGGAGCCTGTGCCCATATGGTCATCCAAATGGACTGGCCAGCGTAAATGACCCCACTGCAGCAGAAAACAAACACACGAGGAGCATGCAGCGAATTCAGAAAGAGGTCTTTCAGAAGGAAACCGAAACTGACTTGCTCACCTGGAACACCTGATGGTGAAACCAAACAAATACAAAATCCTTCTCCAGACCCCAGAACTAGAAACCCCGGGCCATCCCACTAGCAGCTTTGGCCTCCATATTGCTCTCATTTCAAGCAGATCTGCTTTTCTGCATGTTTGTCTGTGTGTCTGCGTTGTGTGTGATTTTCATGGAAAAATAAAATGCAAATGCACTCATCACAA…	0.482587	402
ABCA5	FALSE	FALSE	FALSE	TRUE	ATTTGTATTGTTCGGTCTGCTTACTGGGACTTCTTTCTTTTTCACTTAATTTTAACTTTGGTTTAAAAAGTTTTTTATTGGAATGGTAACTGGAGAACCAAGAACGCACTTGAAATTTTTCTAAGCTCCTTAATTGAAATGCTGTGGTTGTGTGTTTTGCTTTTCTTTAAATAAAACGTATGTATAATTAAGTGAAGCTGCATGTTTGTATTGAAGTATATTGAACTATATAGTTTGTATGTCATCTTTTTCACCATTCAGAAACAGTGCTTCTGAATTTGTGATTTAAAGGAATTGTAATAGAATAGTTTTATTTTTAAGTTATCTTTAAGTTTATGCCATCTTCTTAAATAAGTACGTAATGTTCCAATCTAAATAAAAAACTAATTCATAACTAAT…	0.281773	3226
ABCA6	FALSE	FALSE	FALSE	TRUE	GAAAACAGGGAAAGCCCATTTCATTGCTGAACTTATTTCAAGGTCAATCGTATGTTCCTACTACAGGATGACTGCAAAAATTGTAGAGTCATCCAACATATATGTGTTGAGCATGCAGATGCATGTGTCAAAGGACACATGAGTAACCAAGACTGACAGGCCCCAGCCTCAGGTGAGATTCCAGGTTAGCAGCAAAGACAGACATTGAACAATTAATGACAAGTACAAGAAAAAGTGTTTCATGGGCACTTAGACCAGGGGTTCCTAATAGTGGGATTAGAGAAGTCCTACCTGGGGAAATGATGTTTAAAGGGAGACCAGAATGAATAGCAGGTGTGAGGTGCTAGAAGCATTGTGTTTCAGATAGAAGAAAGGTAATTGTGAAGACCCTGAGGTGAG…	0.418848	764
ABCA7	FALSE	FALSE	FALSE	TRUE	GGACGCCCCAGGGGACCCTGGACGTGCCCGGCTGCTCGAGGCGCTGCTGCAGGAGGCAGGACTGGAGGAGCCCCCAGTGCAGCATAGCTCCCACAGGTTCTCGGCACCAGAAGTTCCTGCTGAAGTGGCCAAGGTCTTGGCCAGTGGCAACTGGACCCCAGAGTCTCCATCCCCAGCCTGCCAGTGTAGCCGGCCCGGTGCCCGGCGCCTGCTGCCCGACTGCCCGGCTGCAGCTGGTGGTCCCCCTCCGCCCCAGGCAGTGACCGGCTCTGGGGAAGTGGTTCAGAACCTGACAGGCCGGAACCTGTCTGACTTCCTGGTCAAGACCTACCCGCGCCTGGTGCGCCAGGGCCTGAAGACTAAGAAGTGGGTGAATGAGGTCAG	0.669271	384
ABCA8	FALSE	FALSE	FALSE	TRUE	ACATTCTTAGTGGGTTGTCTGTTCCCACCAAAGGTTCAGTCACCATCTATAACAATAAGCTTTCAGAAATGGCTGACCTAGAAAATCTCAGCAAGCTGACCGGAGTTTGTCCACAATCCAATGTGCAATTTGACTTCCTCACTGTAAGAGAAAACCTCAGACTCTTTGCTAAAATAAAAGGGATTCTGCCACAAGAAGTGGATAAAGAGATACAAAGGGTTCTGCTGGAATTGGAAATGAAAAATATTCAGGATGTTCTTGCTCAAAACTTAAGTGGTGGACAGAAAAGAAAGCTAACCTTTGGGATTGCCATTTTAGGAGATCCTCAGATTTTCCTGTTGGATGAACCAACTGCTGGATTGGATCCCTTTTCAAGACACCAAGTATGGAACCTTCTGA…	0.396083	1583
ABCA9	FALSE	FALSE	FALSE	TRUE	AGCTCCAAATACCCTATATCTTTCTTTAATCCTGTGACTCTTTTAAAGATAATATTTTATAGCCTTAATATGCCTTATATCAGAGGTGGTACAAAATGCATTTGAAACTCATGCAATAATTATCCTCAGTAGTATTTCTTACAGTGAGACAACAGGCGATGTCAGTGAGGGCGATCATAGGGCATAAGCCTAAGCCATACCATGCAGCCTTTGTGCCAGCAACCAAATCCCATGTTTCCTACTGTGTTAAGTTTAAAAATGCATTTATTATAGAATTGTCTACATTTCTGAGGATGTCATGGAGAATGCTTAATTTTCTTTCTCTGAACTTCAAAATATTAAATATTTTCTTATTTATTTTTTTGATTAAAGTATAAATTAAGACACCCTATTGACTTC…	0.349685	1427
ABCB1	FALSE	FALSE	FALSE	TRUE	ACTCTGACTGTATGAGATGTTAAATACTTTTTAATATTTGTTTAGATATGACATTTATTCAAAGTTAAAAGCAAACACTTACAGAATTATGAAGAGGTATCTGTTTAACATTTCCTCAGTCAAGTTCAGAGTCTTCAGAGACTTCGTAATTAAAGGAACAGAGTGAGAGACATCATCAAGTGGAGAGAAATCATAGTTTAAACTGCATTATAAATTTTATAACAGAATTAAAGTAGATTTTAAAAGATAAAATGTGTAATTTTGTTTATATTTTCCCATTTGGACTGTAACTGACTGCCTTGCTAAAAGATTATAGAAGTAGCAAAAAGTATTGAAATGTTTGCATAAAGTGTCTATAATAAAACTAAACTTTCATGTGACTGGAGTCATCTTGTCCAA…	0.304918	610
ABCB10	FALSE	FALSE	FALSE	TRUE	GGAAGCAATTACTGGTAAACAATATGAGACTTTAATGCAAAACAGTGTTGCAGAAAAAAAACTCAGAGACTATGAAATACATAAACCATATATCAAGTTATTTGAAAAATACCTATTTTTTTCCAAAGTGTGTAAAAGATTGTTTTGAAACGTACCTGTTCTCAAGATCTTTTTATTCAGAGTTTTAATAATTGTAACTTTTTAAATGTCTATAGCACTGAAGTTATTTTCAGGTTTTGTATTTTCTTTTCTTGTGGAATATTTTAATTAATATAGCATGGCACCTCATTTTCTTTTGCCTGCTGTTAAAGATTGAAGCTATTGTCAAATGACAACTTTAAAAAGGCAATTATAAATAAAAAGCCTGATTATTTTAGGCCAGTTTACCAATCACTGTGT…	0.289919	1597
ABCB11	FALSE	FALSE	FALSE	TRUE	AAATTCGTGCTTGAGAAGAAAACTATGACAGAAAGGACATTATAGTGGATCACTGTCAGAAGCCATCAAATTCTTTTCCCTTCATGACTGGTGTCACCTTCCATCTAGCAATTTGACACCCTTGTTGGAGAAGGAGGAGGCCAGATGAGTGGTGGCCAGAAACAAAGGGTAGCTATCGCCAGAGCCCTCATCCGAAATCCCAAGATTCTGCTTTTGGACATGGCCACCTCAGCTCTGGACAATGAGAGTGAAGCCATGGTGCAAGAAGTGCTGAGTAAGATTCAGCATGGGCACACAATCATTTCAGTTGCTCATCGCTTGTCTACGGTCAGAGCTGCAGATACCATCATTGGTTTTGAACATGGCACTGCAGTGGAAAGAGGGACCCATGAAGAATTA…	0.457933	2603
ABCB4	FALSE	FALSE	FALSE	TRUE	TGACATCTCCAAAATCAGTGAAGGAATTGGTGACAAGGTTGGAATGTTCTTTCAAGCAGTAGCCACGTTTTTTGCAGGATTCATAGTGGGATTCATCAGAGGATGGAAGCTCACCCTTGTGATAATGGCCATCAGCCCTATTCTAGGACTCTCTGCAGCCGTTTGGGCAAAGATACTCTCGGCATTTAGTGACAAAGAACTAGCTGCTTATGCAAAAGCAGGCGCCGTGGCAGAAGAGGCTCTGGGGGCCATCAGGACTGTGATAGCTTTCGGGGGCCAGAACAAAGAGCTGGAAAGTCCACACAGACCACACTAACCCTCAGTTGGACCTCAGGATGTCAGTGTAATCTGTGCCGCTCCATTAGCCCCGGTATCAGAAACATTTAGAAAATGCCAAAG…	0.463702	1529
ABCB5	FALSE	FALSE	FALSE	TRUE	TGCTGTTGAGGTAGCACATATTTTGATGTTCGTGTAATGCAAAGAAGGAGTACTTAATAATTACTTGGCAAGCTTTGATCTCTTTTATTGCATATATCAATACCTAGAATCATGCTACTCAAGTACATACATGTTCTATTCACACACCATCTGACCTTCAGATTTTTAAAAGGAAGCAAAAATTTGCTTATTTCATGTAAGTGAAATAATGCTTATATCCTTCACTTTATAAAACTATTCTAGCACATTTGCTTGTAAAGCAGTTTTCTACAAGGTGAATTTATTTCCCATCAACTTCTGCTATAAAATCGGAAATATGTTTCCAGGGGGAATATTATCCAATTAACCATGTTGAAGGTTTTAGCAAAGGCAGTGTAAGATAGAGTGGGGCCTGTAGCA…	0.366787	1385
ABCB6	FALSE	FALSE	FALSE	TRUE	TATCCACAGGGTACAGGACACAGGTGGGCGAGCGGGGACTGAAGCTGAGCGGCGGGGAGAAGCAGCGCGTCGCCATTGCCCGCACCATCCTCAAGGCTCCGGGCATCATTCTGCTGGATGAGGCAACGTCAGCGCTGGATACATCTAATGAGAGGGCCATCCAGGCTTCTCTGGCCAAAGTCTGTGCCAACCGCACCACCATCGTAGTGGCACACAGGCTCTCAACTGTGGTCAATGCTGACCAGATCCTCGTCATCAAGGATGGCTGCATCGTGGAGAGGGGACGACACGAGGCTCTGTTGTCCCGAGGTGGGGTGTATGCTGACATGTGGCAGCTGCAGCAGGGACAGGAAGAAACCTCTGAAGACACTAAGCCTCAGACCATGGAACGGTGACAAA…	0.545781	557
ABCB7	FALSE	FALSE	TRUE	FALSE	GTCACATAAGACATTTTCTTTTTTTGTTGTTTTGGACTACATATTTGCACTGAAGCAGAATTGTTTTATTAAAAAAATCATACATTCCCATTTTCTATAATCCTTCTTTTAGATAAGATTTATTTAAAAGGGGATTTGAGTTTTACATCTTTCATAGTCTATTTAATGTGGCATCTGTATTTATCCCCAAATTATTTTCTTGTCACTGTCCTGGTTGTGCTCAATGCATACTTTTTGCTACCTGTTTGATATTACCACATTACCCTCTTGAGGCCTGACATTCATTTGATCTATAGCCAGATGAATCAGATTGGTTTCCCAATTTTTATAGTTTTTAAAACCTTTATGCTGACAATTTAGAGGGAAAGTGTCTGTTTCTTAACATGAAAGAAAAAGAGG…	0.372797	1816
ABCB8	FALSE	FALSE	FALSE	TRUE	GAAGGGCCCCCTGAGGTGTGGTCGCTGCCAAGCATCAGTGTTAGGGCTGGGGCTCAGCCTGGGGGAGCCTACTGGGGACTGAGCCCCCAGGAGGGCCAGCATGTGGAGAGTCGCTGCGGCTGCTCCTGCTCACAATAAAGCCGGGGCCGAGCAGCTGGCAGGGGAGGCCAATCCCTCCCTCCCCTCCCCAGTCCTGCCGGCTGCCTCCCTCCCACCAGAGTCTGCCAGAGTCATTGGGCTGCAATGGGCAGAGACAGAGTTCCACGAGACACCTCCACTCTATTCTCCCTTTGCCCAGACCCCTCCAGACCTCTCAAGAGACGTTCTGGCCAGTCTCCCTGCCCCACCCAGCAGCTTCAAATTGGCCAGGCCTACAGTAGCTCCAGGGAATTTTTAAAA…	0.579942	2433
ABCB9	FALSE	FALSE	FALSE	TRUE	TGGTGTCCAACATCTACGGCAAGTACTACAAGAGGCTCTCCAAAGAGGTCCAGAATGCCCTGGCCAGAGCGAGCAACACGGCGGAGGAGACCATCAGTGCCATGAAGACTGTCCGGAGCTTCGCCAATGAGGAGGAGGAGGCAGAGGTGTACCTGCGGAAGCTGCAGCAGGTGTACAAGCTGAACAGGAAGGAGGCAGCTGCCTACATGTACTACGTCTGGGGCAGCGGGCTCACACTGCTGGTGGTCCAGGTCAGCATCCTCTACTACGGGGGCCACCTTGTCATCTCAGGCCAGATGACCAGCGGCAACCTCATCGCCTTCATCATCTACGAGTTTGTCCTGGGAGATTGTATGGAGAATGTCTCCTTCAGCCTGTCCCCCGGCAAGGTGACGGCCC…	0.577241	1696
ABCC1	FALSE	FALSE	FALSE	TRUE	GCCCCAGAGCTGGCATATCTGGTCAGAACTGCAGGGCCTATATGCCAGCGCCCAGGGAGGAGTCAGTACCCCTGGTAAACCAAGCCTCCCACACTGAAACCAAAACATAAAAACCAAACCCAGACAACCAAAACATATTCAAAGCAGCAGCCACCGCCATCCGGTCCCCTGCCTGGAACTGGCTGTGAAGACCCAGGAGAGACAGAGATGCGAACCACCCAAAACACGCACACCCTGCCCCTGGTGCCCTGAGACAGACACACAGCCTCACGCCCCCAGGAATGCAAGTGGTTTCCTGGTGCTTCCCACGGAGGAGTTTTGGCAGCCAGACTTCTGGAGGAATTGGTTGTATAGAAGATCCTAGTGACCAAATTCAGCCTACTGCCTCGGATCTCTCCA…	0.477146	1794
ABCC10	FALSE	FALSE	FALSE	TRUE	GCCCAATCCCACACCCTGCAGAGTTCTCCCCTCTCTCTGATCCAGGCCGGGCCTATACAGAGGTGCTGGCTGCTTGTTTACATTCTCCTCTGGGGCTCTACCTCTCCACACTTCCCCAGAAGGGAAAAGGGCACCCTGGATTACTCTTTGGAAATCACTCCTTGGTGGGCAGCATCCTGAGGCTTCCCCAGAACCAGGCCTCTGCTCTGGCCCTCTTGCATCTGGAACGCCAGGTGGGTTTTTCTGGCATAGGAGCCCACTTGCATTTTCATAGTTTTATTTGATAAAATTCCATCTTACATTCTGTGTATTAAAAAAATAATATTTCTGGTGTGAGGC	0.501475	339
ABCC11	FALSE	FALSE	FALSE	TRUE	GGAGATGTGGAGACTTCATGGAGGCTGGCAGCTGAGCTCAGAGGTTCACACAGGTGCAGCTTCGAGGCCCACAGTCTGCGACCTTCTTGTTTGGAGATGAGAACTTCTCCTGGAAGCAGGGGTAAATGTAGGGGGGGTGGGGATTGCTGGATGGAAACCCTGGAATAGGCTACTTGATGGCTCTCAAGACCTTAGAACCCCAGAACCATCTAAGACATGGGATTCAGTGATCATGTGGTTCTCCTTTTAACTTACATGCTGAATAATTTTATAATAAGGTAAAAGCTTATAGTTTTCTGATCTGTGTTAGAAGTGTTGCAAATGCTGTACTGACTTTGTAAAATATAAAACTAAGGAAAACTCA	0.442308	364
ABCC12	FALSE	FALSE	FALSE	TRUE	CCCACCAGCTACAGTTCTTAGAGTCTTGTGATGAAGTTATTTTATTAGAAGATGGAGAGATTTGTGAAAAGGGAACCCACAAGGAGTTAATGGAGGAGAGAGGGCGCTATGCAAAACTGATTCACAACCTGCGAGGATTGCAGTTCAAGGATCCTGAACACCTTTACAATGCAGCAATGGTGGAAGCCTTCAAGGAGAGCCCTGCTGAGAGAGAGGAAGATGCTGTTTTGGCTCCAGGAAATGAGAAAGATGAAGGAAAAGAATCTGAAACAGGCTCAGAATTTGTAGACACAAAAGTTCCTGAGCACCAGCTCATCCAGACTGAATCCCCCCAGGAAGGAACCGTGACCTGGAAAACATATCACACGTACATTAAGGCTTCTGGAGGGTACCTCCTTT…	0.503934	2415
ABCC2	FALSE	TRUE	FALSE	TRUE	GTGTCTGTGTGAGCGCGCTGCATGTTTCAGGCAAGGGTACATCAGCATCATGGCGATTCTGTCCTTACATTTTTATAGCACTTCATACTTCTCAGTGCACTTCATATTATTAATGGTATTCACAATACTGATACTACCTTAGTGATGGATACATGGCGTGTAATGTACTGTTCTCTTTCCTTTGGGGTACTTTTGAAATTTTCCAGAATGAAACGTGGTTTTGAAAAAAATAATACCTTAGCATTTCTAGATTTTGCACCTTGGTACAAATTAGCATAAGCAGGCAATTTGTTGATTCATTCACTTGAAAATATTTATTGAGCACAACTGTGTGTCAGTGACCATTCTGGGCACTAAAAGATTGCTCATCTTTTGTGAGCTAGAAAATATGTAGTAAGC…	0.422667	750
ABCC3	FALSE	TRUE	FALSE	TRUE	GATCCTGAACGGCATCAAGGTGCTGAAGCTGTACGCCTGGGAGCCCAGCTTCCTGAAGCAGGTGGAGGGCATCAGGCAGGGTGAGCTCCAGCTGCTGCGCACGGCGGCCTACCTCCACACCACAACCACCTTCACCTGGATGTGCAGCCCCTTCCTGGTGACCCTGATCACCCTCTGGGTGTACGTGTACGTGGACCCAAACAATGTGCTGGACGCCGAGAAGGCCTTTGTGTCTGTGTCCTTGTTTAATATCTTAAGACTTCCCCTCAACATGCTGCCCCAGTTAATCAGCAACCTGACTCAGGCCAGTGTGTCTCTGAAACGGATCCAGCAATTCCTGAGCCAAGAGGAACTTGACCCCCAGAGTGTGGAAAGAAAGACCATCTCCCCAGGCTATGC…	0.56082	3757
ABCC4	FALSE	FALSE	FALSE	TRUE	GACCCACTTGGATAATCCAGGATGATGTCTTCACTCCAACATCCTCAGTTTAATTCCATGTGCAAATACCCTTTTCCCAAATAACATTCAATTCTTTACCAGGAAAGGTAATACTCACAGGTGGCTCAATCCCTTGTTTAAAATTGGCCATAAACGGAGATTAGAGGAAGATGATATGTATTCAGTGCTGCCAGAAGACCGCTCACAGCACCTTGGAGAGGAGTTGCAAGGGTTCTGGGATAAAGAAGTTTTAAGAGCTGAGAATGACGCACAGAAGCCTTCTTTAACAAGAGCAATCATAAAGTGTTACTGGAAATCTTATTTAGTTTTGGGAATTTTTACGTTAATTGAGGAAAGTGCCAAAGTAATCCAGCCCATATTTTTGGGAAAAATTATTAA…	0.414664	5742
ABCC5	TRUE	FALSE	FALSE	TRUE	CCTGATGTGTTTTGCTACGTGAGTGTACGCCCTAGGCTTGTCTCCCTGGTCTTGATCCAGTGTCTCATCTTTGCACCTCTCTCACAACTCCTATCAGAGTTTGTTTCTAATGGAAGAGGTTCACATGATAAAGAACAAACCAGCCAGTCCTCACATCAAGATAGAGATGAAAAATGCCACCTTGGCATGGGACTCCTCCCACTCCAGTATCCAGAACTCGCCCAAGCTGACCCCCAAAATGAAAAAAGACAAGAGGGCTTCCAGGGGCAAGAAAGAGAAGGTGAGGCAGCTGCAGCGCACTGAGCATCAGGCGGTGCTGGCAGAGCAGAAAGGCCACCTCCTCCTGGACAGTGACGAGCGGCCCAGTCCCGAAGAGGAAGAAGGCAAGCACATCCACCT…	0.505266	4368
ABCC6	FALSE	FALSE	FALSE	TRUE	AGGCCACAGTGCACCTGGCCTACCTGCGTGCCGTGGGCACCCCCCTCTGCCTCTACGCACTCTTCCTCTTCCTCTGCCAGCAAGTGGCCTCCTTCTGCCGGGGCTACTGGCTGAGCCTGTGGGCGGACGACCCTGCAGTAGGTGGGCAGCAGACGCAGGCAGCCCTGCGTGGCGGGATCTTCGGGCTCCTCGGCTGTCTCCAAGCCATTGGGCTGTTTGCCTCCATGGCTGCGGTGCTCCTAGGTGGGGCCCGGGCATCCAGGTTGCTCTTCCAGAGGCTCCTGTGGGATGTGGTGCGATCTCCCATCAGCTTCTTTGAGCGGACACCCATTGGTCACCTGCTAAACCGCTTCTCCAAGGAGACAGACACGGTTGACGTGGACATTCCAGACAAACTCC…	0.600524	2288
ABCC8	FALSE	FALSE	FALSE	TRUE	AAGCCTGAAGGTAGAAGGCTGAGGCTTTGGCTGGGAAATGCCCTGTCTGGAGTGAGAAGATGTCCTTGGGCCTCTGAAGTAGCTCTGCCTCCTTGAAAGCAAGAGCCTGTCATGCCTCTATGGAGGGCTGGCTTGTCCTTACCCATGGCCAGAGAACCAGTCAGTAACAAATGTCCTCTGTGTCTTCAGCCTTGAGGAAGGTGACACCCCTGTCTCATGGGACCCTGGCAGGTACTGGGAAGCTGGAAGGAAGGAGTAGCTGTTGGAATGAAGTAGCTGATAGAGAGGGTAGCTTGCAGGGGGAGACTCTAGCATGGGTTCAAAGATGGAATGGGGCATAACTCAGCAAAATTATGCTCTAAGGAGTATCTGACCAGGCAGTAGCTGGTTAAACAGGGA…	0.564706	4420
ABCC9	FALSE	FALSE	FALSE	TRUE	AGGAGTGTCTTAAAACAATACATGTATTTAAAATAATGCAGTCATAACCTAATTAATGGATCATCAGCTTGACCTCTGTAAAGTGGCATCTTAAAACTTTTACAGATTTTTGCACAAAAAGTGGACATTTATTTTTCCTGTTTTTAAAACAGTTTTTCAAGATATTATTGCTTAATATGTTCATTATTGATGTTTTTATAGTGATCCAGCCACTCTAGCTTTAAGAATAGCTAGGTTGTATTAAAACATGTAAGCTACTTTAAGTGATAAATCAATAGCTAAAGTTTTCTCCTAACTTTAAGTCTGGTAAATATCTCTCAGGAATGGAAGTGTCAATGAGTAGTCAGTATTACTATACTCTTGTTTGTAAGAATATATTTTCCTTATTGTTGGAGTCTC…	0.328026	3643
ABCD1	FALSE	TRUE	FALSE	TRUE	CACAACCGTCCCCGGCCCCTGCCCCGCCCCCAAGCTCGGATCACATGAAGGAGACAGCAGCACCCACCCATGCACGCACCCCGCCCCTGCATGCCTGGCCCCTCCTCCTAGAAAACCCTTCCCGCCCTCGGGAAAGTAGATGTGGAGGGTGGCGCCCTGCGTAACCCTCGCCCTGTCCCTCCCACTCCCTGGGGGCGCTGTTCCACAGTGACTGGGCCCTGTCCAGGGCAGTGAGTCCTCTACTTTGCTCCGTGGAGGAAGCTGGGGTACAAGGGGCCCAGTGCTGGCCACACAGCAGCGCAGCCGAGCCCCAGGAGCCCGTCAGGCCACAGCCCCTGGCACTGCAGGTGGCCTCCCTCCAGAGACTCGAGTCCCCATGATTCCCTCCTCGTCAGTCTC…	0.667965	1027
ABCD2	FALSE	TRUE	FALSE	TRUE	TTTGTTTTGACATATTTTAAAAGTTAATTATTAGATAAAGGCTCAAAGACATTCTGTTATACTGCATGAAGTATGTTAAGCTAAGCACAGAGAAAAAAAGGCAGCAAGACATGTTTTATAAGATTTTAGCATTAAGGAAGTATATGATCTGACTTTTCAGAAGAAAATAAACAAATGCATTATGTAAGGTCAGTCATTATGACTTATACTAATTCCTAGTGAAGGCCTAATGCACTTGTAAAACAGGATTTTCTAGGTGAATTCATGATGAATACCAGATTTACTATGTATATGTGGTGTGTCTGAAGTTCTTAACAAACATGGGCAATATTCTGGAAATGAAACAAGTTAAACTGAGCAGCATTTGGGTTGATACCAAGTGCATAAGATTCAAACTTT…	0.29621	3879
ABCD3	TRUE	FALSE	FALSE	TRUE	AGAAATCTGGAGAACTATACCTGCTTCAGTGAAATAATTACAGAATATACTTAGAAAGGCAAAGTACATTGTAAAATAAAGTTGAGCTTAGTTTTTTTTAAAAAAAAAAACAAAGCAACAAATTAACTAGATACAGAATAATGGAGAACAAGTTGTTAAAACATTTAATATTATATAGGATATTGCTAATTGTGTATATGTTGGTTTAATTAATAATATGTACTAAGAATGTCCTTATTCTTGTGGTTAAAAACCTGCCTAAATTAAATTGGGCTTCAATCACTGTAACCTGATTCATCCTGGGATGTAAACCATTCGAAGTCAGCTAATTGGACTTTTATGGCTCTATCTTTTCCTTCAGTGAAGAACCCTATTTAAAACTGGGTCATCATTTGTCCT…	0.318123	1534
ABCD4	FALSE	FALSE	FALSE	TRUE	TCAGTTCACCTGCAACCTGCTGTATGTGAGCTGGAGGAAGGACCTCACTGAGCACCTTCACCGCCTCTACTTCCGGGGCCGTGCGTACTACACCCTCAACGTGCTGCGGGATGACATCGATAACCCGGACCAGCGCATCAGCCAGGACGTGGAGCGATTCTGCCGGCAGCTCAGCAGCATGGCCAGCAAGCTCATCATCTCCCCGTTCACCCTCGTCTACTACACTTACCAGTGCTTCCAAAGCACAGGCTGGCTCGGGCCTGTGAGCATCTTCGGGTATTTCATCCTGGGGACCGTGGTGAACAAAACTTTGATGGGCCCCATTGTGATGAAGCTGGTGCATCAGGAGAAGCTGGAGGGAGATTTTAGGTTCAAGCACATGCAGATTCGGGTGAATGC…	0.551402	2140
ABCE1	FALSE	FALSE	TRUE	FALSE	ACTGACTCTGAGAATATTGATAAGCCATTTATTAAAAGGAGTATTTACTAGAATTTTTTGTCATATAAAACTTGAATCAGGATTTTATGCCCCACATACTCTGGAACTTGAAGTATAATATACTTAATATAACATAAAAAGCCAGTTGGGTTCTAAATTGTAGTTGAAACACAGAAAATGCCACTTTTCTGTTCCTGAAGAGGCTCTTTTGTGCATAATATTCTAAAATGAAGACATTTCAAGCTATACAAATTACTTCCAAGTTTTCATGATGTATGGGAAGATTTTCAGTAGGTGTATTATATTCACGGTACCAAATGCTGACCAGTGTTGCTCCATTTTTTAAATCTTGAAAAGGGTTTCTGTACTTACCTGGTTTGCCAAGTATGCCAGTGTAAT…	0.319427	1606
ABCF1	FALSE	FALSE	TRUE	FALSE	GCTTTCCTTCCCAGAAGTCTCCCGAGAGACATATTTGTGTGGCCTAGAAGTCCTCTGTGGTCTCCCCTCCTCTGAAGACTGCCTCTGGCCTGCAGCTGACCTGGCAACCATTCAGGCACATGAAGGTGGAGTGTGACCTTGATGTGACCGGGATCCCACTCTGATTGCATCCATTTCTCTGAAAGACTTGTTTGTTCTGCTTCTCTTCATATAACTGAGCTGGCCTTATCCTTGGCATCCCCCTAAACAAACAAGAGGTGACCACCTTATTGTGAGGTTCCATCCAGCCAAGTTTATGTGGCCTATTGTCTCAGGACTCTCATCACTCAGAAGCCTGCCTCTGATTTACCCTACAGCTTCAGGCCCAGCTGCCCCCCAGTCTTTGGGTGGTGCTGTTCT…	0.52381	1071
ABCF2	FALSE	FALSE	FALSE	TRUE	GCCCTCTACCTGGGTTCGGGTCAGGAGCTCCATCTGGGAACTAACAGCTGCTAACCTGACCAGCCGCTCAGGACAGGACCCTGGGGCTACACTCCTGCATTGCTGCAATACTGCTCCCCCAGCCTCTCCCCTGCCCCTCAACCTGCCTTAGCTGCACTCTCTTACCTACAGCTGGACAGTACCTGTCTGTTTCCTGTCCTCCTTCCAGTTACATCTGTCCATGTCTGGACTCGGCTGGCCGTTCCCTCCAGCCCCTTGCTGGTTATCTTACTCTGAGTGTGATGCAGTCAGAGGCACCTGCGGGTTAGCCCAGGGGCCCAAGCCCTGGATTTGGCCTGCGGAGGAGCTTAGGATCCTCGTTTTCTGGGTTTTGGTGATGTTGGAGGAGTACCCCCCAGC…	0.527494	1564
ABCF3	FALSE	FALSE	FALSE	TRUE	GGCCACCAGGCTGAGGACTCGCCCAGGACATGGACTGGTCTCTCAGACCCCTGGGCCACCATGTAGGCCACCACTCCAGGCCGTGGACTTCCCCCAACTTGGGGACAGCCTTATTCCCAAATGTCTCTATCCTTTTGACTGGAGCATCTTCTGCACAACCTTGGGAGCCCATCCAAGGGTTGGTGAGGACTGGTCTCCCGGGGGTGGGGGTCTGGGGGGTACCCTCTGGGGTTATAGATTCCCCCACTGCCCCAGCTCTGACTGGACCCCAAGTGGCTGCTATGTAAATTAAATCTCTCCCCGCGTCTC	0.595469	309
ABCG1	FALSE	FALSE	FALSE	TRUE	AACACCTGAATGCCAGGAAACAGGAAGATTAGACACTGTGGCCGAGGGCACGTCTAGAATCGAGGAGGCAAGCCTGTGCCCGACCGACGACACAGAGACTCTTCTGATCCAACCCCTAGAACCGCGTTGGGTTTGTGGGTGTCTCGTGCTCAGCCACTCTGCCCAGCTGGGTTGGATCTTCTCTCCATTCCCCTTTCTAGCTTTAACTAGGAAGATGTAGGCAGATTGGTGGTTTTTTTTTTTTTAACATACAGAATTTTAAATACCACAACTGGGGCAGAATTTAAAGCTGCAACACAGCTGGTGATGAGAGGCTTCCTCAGTCCAGTCGCTCCTTAGCACCAGGCACCGTGGGTCCTGGATGGGGAACTGCAAGCAGCCTCTCAGCTGATGGCTGCA…	0.451878	852
ABCG2	FALSE	FALSE	FALSE	TRUE	AGCAGGGCATCGATCTCTCACCCTGGGGCTTGTGGAAGAATCACGTGGCCTTGGCTTGTATGATTGTTATTTTCCTCACAATTGCCTACCTGAAATTGTTATTTCTTAAAAAATATTCTTAAATTTCCCCTTAATTCAGTATGATTTATCCTCACATAAAAAAGAAGCACTTTGATTGAAGTATTCAATCAAGTTTTTTTGTTGTTTTCTGTTCCCTTGCCATCACACTGTTGCACAGCAGCAATTGTTTTAAAGAGATACATTTTTAGAAATCACAACAAACTGAATTAAACATGAAAGAACCCAAGACATCATGTATCGCATATTAGTTAATCTCCTCAGACAGTAACCATGGGGAAGAAATCTGGTCTAATTTATTAATCTAAAAAAGGAGAATTG…	0.342256	2092
ABCG4	FALSE	FALSE	FALSE	TRUE	AGGCTTGCCCCAGCCTGTACCCCAGCCCCTGCAGCAGGAAGCCCCCAGTCCCAGCCCTTTGGGACTGTTTTAACCTTATAGACTTGGGCACTGGTTCCTGGCGGGGCTATCCTCTCCTCCCTTGGCTCCTCCACAGGCTGGCTGTCGGACTGCGCTCCCAGCCTGGGCTCTGGGAGTGGGGGCTCCAGCCCTCCCCACTATGCCCAGGAGTCTTCCCAAGTTGATGCGGTTTGTAGCTTCCTCCCTACTCTCTCCAACACCTGCATGCAAAGACTACTGGGAGGCTGCTGCCTCCTTCCTGCCCATGGCACCCTCCTCTGCTGTCTGCCTGGGAGCCCTAGGCTCTCTAGGGCCCCACTTACAACTGACCAAAGTGGCCCCCTCTGGGGGTCCCCACCA…	0.579832	1547
ABCG5	FALSE	FALSE	FALSE	TRUE	TGAAAGCCATGGCTGGGAAAATGGAAGTGAAGCTGCCGACTGTGCATGACTGCTCTGAACGTCTGAAATGAGAGTGCCATGTATTTCTTTCTTGACAGGACATCTCAAGTCTTTTAACCATTAAGACTCCATTTGTGCCTCTTGGATCCAAGCAGGCCTTGAATGCAATGGAAGTGGTTTATAGTCCCTTGCTCTTACAACTTGCAGGGACATGTGGTTATTTGGAAATTGTGACTGAGCGGACCCAAGAATGTAAATAATATTCATAAACCTATGGGAGACTCGTGTGACTATTTTTTTTCCTTGTTCTAGGCACAGAAAAAAATAGGTCAGCTTAAAAATATGTTTACATTGGATAAAGGATTAGGCAAAAATAAAATGTTTCAAGGATTCCTGACC…	0.420807	644
ABCG8	FALSE	FALSE	FALSE	TRUE	TTCACGCCAGACGTCTGCCCGCTGGTGGGGGACCTGAGCAGACCCTTCAACTGCACTCCCTCCTCAGGAGCCCCTTCCTGGGGACAGTGAGGACAATGACCCTACAGATGCTCAGCTACATCCGGCCCAGGGTGCTGCAGTGGCACAGACCAGCCACAGGATGGCAGTAGAATAAAGACAGTCGAAAGGGATTTCTGCTCACTGGCAGGAGACTGCGATGACTGGGAGAAAACCTGCACTCGGTGGCACCTACAACGTTGCTAATTTATTTCCTTTTGATATGCATTTATATAGGCAACTCGATATAGGATGGGAGCAAACTAGGAATGAATTGGGTAGCTAGACTGTGCAGGAATTGTTGGAACCTGGAGGGAACAATAACAGTAGCTAGCAGATTTG…	0.465905	5074
ABHD1	TRUE	FALSE	FALSE	TRUE	AGACAGTCGTGAACCACATAAAGCATCGTTATCCCCAAGCTCCACTGCTGGCCGTGGGCATCTCTTTTGGAGGGATACTGGTGCTGAATCACCTGGCACAGGCCAGGCAGGCTGCAGGGCTGGTGGCAGCACTGACTCTGTCTGCATGCTGGGATTCCTTTGAGACCACTCGCTCCCTGGAAACCCCACTCAACTCACTGCTCTTCAATCAGCCCCTCACTGCTGGGCTCTGCCAACTTGTGGAACGCCTATCCTATGGTAAGACCTGCAGGCCCGTACAATCCGCCAGTTTGATGAGCGCTACACATCTGTGGCCTTTGGATATCAAGACTGTGTTACCTACTACAAAGCAGCAAGCCCTAGAACCAAGATAGATGCCATCCGGATCCCTGTGCTCTA…	0.552301	717
ABHD10	FALSE	FALSE	FALSE	TRUE	TATCACATGTTTAGTTGGTATGTAAACTAATGTATCCAGAAGATTGGAAGAGGGATAAGAAATGAAAGATCCTGATACTTTAGGTTTTTCCCTTTCCTCTATTTTGTAAATATAAGATGAGTATTATTTAATGATGTATTTGCATAAGTAATGCAAATTGTGAAGAAGGACCAGCTGCTGTTTAGAAAATTTTCTCCTTCCTTCTGTCCTTGATTTTTTTTCATTAAAGTATTTCCTTTTTTTAATTCAAGAAAAGTTTACCTTTCTTATGCTTATGTTAGCTATGCCAGCTCTTAATTGCATCCTTTTCTAATTAGGATTATTAATAAAGCGTGAATATTTTGTTTTTTATTATAGACAGAAATTTGTAACATTACTTCTGATTTGAAAATGCAATTC…	0.321559	1642
ABHD11	FALSE	FALSE	FALSE	TRUE	CCACGGTGACAGCCCCCACAGCCCAGACATGAGCTACGAGATCATGAGCCAGGACCTGCAGGACCTTCTGCCCCAGCTGGGCCTGGTGCCCTGCGTCGTCGTTGGCCACAGCATGGGAGGAAAGACAGCCATGCTGCTGGCACTACAGAGGCCAGAGCTGGTGGAACGTCTCATTGCTGTAGATATCAGCCCAGTGGAAAGCACAGGTGTCTCCCACTTTGCAACCTATGTGGCAGCCATGAGGGCCATCAACATCGCAGATGAGCTGCCCCGCTCCCGTGCCCGAAAACTGGCGGATGAACAGCTCAGTTCTGTCATCCAGGACATGGCCGTGCGGCAGCACCTGCTCACTAACCTGGTAGAGGTAGACGGGCGCTTCGTGTGGAGGGTGAACTTGGA…	0.565336	1102
ABHD12	FALSE	FALSE	FALSE	TRUE	GCCTGGCCGTGGGAAGGAAGCATGAAGACCTCTGCCCTCCTCCCGTTTTCCTCCAGTCAGCAGCCCGGTATCCTGAAGCCCCGGGGGGCCGGCACCTGCAATGCTCAGGAGCCCAGCTCGCACCTGGAGAGCACCTCAGATCCCAGGCGGGGAGGCCCCTGCAGGCCTGCAGTGCCCGGAGGCCTGAGCATGGCTGTGTGGAAAGCGTGGGTGGCAGGCATGTGGCTCTCCTTGCCGCCCCTCAACCTGAGATCTTGTTGGGAGACTTAATGGCAGCAGGCAGCCATCACTGCCTGCTTGATGCTGCACTGAGCTGGACAGGGGGAGTCCGGGCAGGGGACTCTTGGGGCTCGGGACCATGCTGAGCTTTTTGGCACCACCCACAGAGAACGTGGGGTC…	0.608964	647
ABHD12B	FALSE	FALSE	FALSE	TRUE	ACCTGGGGTGATGCTAGGGATCTGGCACACAGTCCCCAGCTGCCGGGGGGAAGATGCCAAGGGGAAGGACTGTTGCTGGTATGAAGCAGCCCTTCGTGATGGGAACCCAATTATTGTTTATCTTCATGGCAGTGCAGAACACAGGGCAGCTTCGCACAGACTGAAGCTGGTAAAGGTGCTGAGTGATGGTGGCTTTCATGTCTTGTCTGTTGACTACAGAGGATTTGGGGACTCTACAGGTAAGCCCACAGAGGAGGGACTGACTACGGATGCCATTTGTGTCTATGAGTGGACCAAGGCAAGAAGTGGCATCACTCCCGTGTGTCTCTGGGGCCACTCTCTGGGTACAGGAGTTGCAACAAATGCTGCAAAAGTGCTAGAAGAAAAAGGATGCCCAGT…	0.440666	1382
ABHD13	FALSE	FALSE	FALSE	TRUE	TGTTTCCCTTTTTGATTATTGCATTGTATTTTAATTTGTGCAGAATGATAAAGAATGTTCCTTTTAGAAGTGTGTTATGTCTGTACCTGTCTGAAGAGTGACATTAAACTTTGAAAGGACTTCACTGCTCCTTTACGATATTCCAAATAGTTTTTTACATTGGAAAAACTAATTCTTGGGATTCTTTCATACATTTTCATCAAAACTTTCAGTGTGATTATGTATTCATATCTTCAGTTTAATATGTCAGTATAATAGATATTGTTCAAAAGTTTCTTGTTGCTAAAGTGGTGTAATCTGTTACACAGATGAATAGCTAGATGTGGAAAGAGATATGTAAACAAGAAACCTTTGGGTATTGTTTCTTAAGTAAATATTGGGACAATCATGGTAAGCAAA…	0.303505	4023
ABHD14A	FALSE	FALSE	FALSE	TRUE	AGCTACGCAATGCAGGCCATGCCTGTTACCTCCACAAGCCGCAAGACTTCCACCTTGTCCTGCTTGCCTTCCTTGACCATCTACCTTGAACTAACCCACTCCCAGCTCCCAGCCTGGCATGAGCTTGGACAGTCTGGACCGCCACCCTCCCTGAACCAGGGAGACAGCCTCTGGGATTGGAGGCCAGAGGCCAGGGTCAGACCCAGCCAGGACTCCTCATTTCATCTCACAGACACAATAAAAAAGCATATTTGTCCTGCCTGGGA	0.56015	266
ABHD14B	FALSE	FALSE	FALSE	TRUE	AGCCCAGCACTGCTGCAGGGGGTGGGCTGCCTGCCTGCTCTGAGCTCTCTCTTGCACGCTCTCTCTTCTCTCCCAGGCTCTGGCTCATGCACATGCAACAGGTGCGTCTGTCTATATGTCTGGGTTCTTGTCTTTTGTGGTCTGTTTGTCTTTTCTACCTCTTTCTCTTGCAGTGATAGACTGAGGGGGTAAAATCAAGAGAAAAAACTCTCAGGAATCAAGGAACATAATCCTGTGGAGGGTAATCCATTACATGAGCTTCTCCTGTTCTTCCACTTTCCTGCCTGGCTTTCACTCCTTCCCCTGCTCTGCCCAGCCTTTCCCTCCCACCCACTCCTCCTTCTGCAAATGCCCTGAAGGCCAGCCCTTACCCCAACACCCACTTCCCCACCTCCTTAG…	0.537118	916
ABHD15	FALSE	FALSE	FALSE	TRUE	AAGACCTGGCCTGAGAACCCCCAAGTCCTGCAAAGAAAAACAGAGCTGGGCAAGGGGGAGTCCTGGAAAGATGGGGCGGACTGAACAGAGGGAGCTCCAGCTCTGTGCTCCTCATTCAGTCCCTCTCTCTTAAATTGGTGCCTTGAAAGAGAAGGAACGTCCTGCGAGCCTGCACTCACTTCATCCTCAGCAGAACTCCTGCCTGGCCTCTGCTCAACATATCCCTACTCATCCGGTCAGCAGCGGCGCGTTCCAGTCACTGTCACCTGTCACTGACATCACAAGCCAAAGGATAGCACTTTTTCAATCCATGGACTCAGGAGAAAATGCCCTCTTACTGGCAGTGGCTAGAGGGATGAGACGTTTGTGTATGTCACTGGGCAGTGACCCCGATTCTCA…	0.471698	2014
ABHD16A	FALSE	FALSE	FALSE	TRUE	CAGCATCCTGGCACTGGCTTCAGTATTCTGGTCCATCTCTTATTACTCCTCTCCCTTCGCCTTCTTCTACTTGTACAGGAAAGGTTACTTGAGTTTGTCCAAAGTGGTGCCGTTTTCTCACTATGCTGGGACATTGCTGCTACTTCTGGCAGGTGTGGCCTGCCTCCGAGGCATTGGCCGCTGGACCAACCCCCAGTACCGGCAGTTCATCACCATCTTGGAAGCAACACATCGGAACCAGTCTTCAGAAAACAAGAGGCAGCTTGCCAACTACAACTTTGACTTCCGGAGCTGGCCAGTCGACTTCCACTGGGAAGAACCCAGCAGCCGGAAGGAGTCTCGAGGGGGCCCTTCCCGCCGGGGTGTGGCCCTGCTTCGCCCAGAGCCCCTGCACCGGGG…	0.562891	1757
ABHD16B	FALSE	TRUE	FALSE	TRUE	CCTATATGCCCCAGTGGGGGATCACGCACTTGAACTCC	0.578947	38
ABHD17A	FALSE	FALSE	FALSE	TRUE	GGGGGAGGCCAGAGCGTGCCCAGGGCCTCCACCGGGGATGTGTCCTGTTCGTTTGAGTGGTGACATCCAGGTGGCAGCTCGGGGCTCCTGCCTGTAGCAGGTGGCAGGGCTGGGCTGGCTCAGCACACTACTGACCATGGCTGCCAGGGAGCAGGCCAGGGAGGCCGAGGCAGAGCTGGAGCCACAGGCACCAGCCAGGCAGCATCCTTTGGGGCATGGGTACGGCATCAGCCCGGACAGCATCATCCTGTACGGGCAGAGCATCGGCACGGTGCCCACCGTGGACCTGGCCTCGCGCTACGAGTGTGCCGCGGTGGTGCTGCACTCGCCGCTCACCTCGGGCATGCGCGTCGCCTTCCCCGACACCAAGAAGACCTACTGCTTCGACGCCTTCCCTAA…	0.666667	621
ABHD17B	TRUE	FALSE	FALSE	TRUE	AATATTCTGTAAATTTGCTACTGGGTTTTCCTTTCTTGCTGAACTGCACTCTTTGGTAAATAACATAAAACCTGAAGGTTTTGTTTGCAAATCATGTCAGTTGCCTTCATAAATGTACAGGTAATGATTTGTTAACAGACTTAATGAAGGTTTTAATTACCAGAACTAAAAACTGGAAATAACAGTACCGTGCAGTCAGGCTGTGTAATTTATATTTTTTCTGTGAATTTTTTTTTAACATCAAGATGAGTACTGTATGAGATTTTAATTCTATAAAATCAAATGCTGTAAAAGTATTGCCAAATGCTTTTGCATACTAGAAACAAATTTATAAATATTTTTAAAACATCTCAATATATTAAATCTTATCCTGGAATACAACTGTAATATTTTGAAAAA…	0.329052	1635
ABHD17C	TRUE	FALSE	FALSE	TRUE	AGACAACAACTTGATCTTACCTCATTTACTGTGAACAGAAGAGTCCTCTGTTTTGCACATGCTTTAACTGGGTAGCTGTAAAGGCTTGATAACCATGAAGAAGTGCCCAACCTTTAGGGTGTTCTAATCAAAGAGCTGATGAAATCTCAGTCTTTTGTATCTAGAGGTGGTTCTGCTAATTCACACAACACGTTAAACTGAACAGTCGTGATTCCCAGCTTCATTACCTTGCAGGAATGGGAATGAGAGCTGAATGTAGGGACAATTTTCTAGTGCTGTATAAAGTAGCCTCGCATCTGTTTCTCAACCTTATCCATCATTTCTGACATTCATGCAGGACTTGCCCTGTTGCCACCAATGTTCTCGGTATTTCACATGCAGCTCTCTTTCTGCCACTGG…	0.36211	1251
ABHD2	FALSE	FALSE	FALSE	TRUE	GGCCTCCGGACTCTGGCACGCTCCAGCAGCCCTCCTCTGGAAGCTGCGTCCCCTCACCCCCTGTTTCAGGTCTCCCATCTCCCTCAGTGACCTGGATCTGACCTCACACCATCAGCAGGGGGCACCCACCATGCACACCTGTCTCGGAGTAGGCAGCTCTTCCTGGGAGCTCCAGGCTATTTTTGTGCTTAGTTACTGGTTTTCTCCATTGCATTGTTAGGCATGGTGACAAGTGACAGAGTTCTTGCCCTCTGTCCAGTTTCAGCATCTGGTTGCTTTTAAGCCAAGTACATCTAGTTTCCCTATTAAAAATGTGTCTGAATAGCGATTTTGCTTTGCCACCAAAAGGCTTTTCCCTGAGAACAGTGAAGGATGTATGTCATTTTGTGGTGGTTGTAT…	0.458844	6937
ABHD3	TRUE	FALSE	FALSE	TRUE	TCCATCTTAGTGAAGAATTAGGATACAGATGTGTGGTTTTTAACAACAGAGGAGTGGCGGGGGAGAATCTCTTGACGCCAAGGACTTATTGTTGTGCTAACACTGAAGACTTGGAGACAGTTATTCACCATGTACACAGCCTGTACCCTTCTGCTCCTTTCCTGGCAGCAGGGGTTTCAATGGGAGGGTAAGGTTTTCCCTTTCTAAAATAATCTCTGAGAGGGAAGCTATTTTATTGGCTGTCTCTTTGAGAGGACTATAAGCTAGCTGTATGGACACTTTTTAAATAAATGTCTGATTATGTTTATCATATTTTATTAAATGCGGTTGATTGAATGAACGAAGGAAGGAAAGAATTAATTCAGGTGAATTTTAATATTTTTCTTAACTACGGGTCTC…	0.42225	791
ABHD4	FALSE	FALSE	FALSE	TRUE	GCTGCTCTCTGAAGAGGAAGAGGAGAAAGCCAGAGAGTCACTCTTACCTCCCTGTCTGCTTACTCACCCACTCTGTCCTTTCCTCACCAACTAACATGTGCCAGCCAGGCAGAGTCTTGTGCTGTTCCCAGAACAGGACGACAGTGAAAAGAACACTCTTGACCCTACACTGAAGGCTGAAGGCAGAAGCCACAAGAGGCCTTGAGTGCCACCCCCAGGGAAGAACATAAAGGGTTGCACAATGCCACCCATCCACTCCTTGCCAAGTGTTACCCAGATGGTGGAGGATGTGAAGGGATTGCACCAAGCCACATTCACTCTCTCTGTGGCCTTTCTTCCTCTGGGCAAAGAAGGGCTTCCAGTGGCCTTTCCTCACTCTGTAGTGTTTGTGGGGATAGG…	0.514336	2267
ABHD5	FALSE	FALSE	FALSE	TRUE	ACACACTGAAGCTCTGATGGGAAAACCTGGTGACTGATATAGTTGTTCAGCAATAATTCATAGTCTGTGATGAAGAGTAGTGAATACAACACACAACCAGGCAGCCTTCTTGACTATACTTTGCACATGTTTTCTTTAGGAATTCACTCACACATTTAAACCAGTTAGTGCCTTCTAGAAGAATGGCTTTCCTTTCTCCTACACAAAATTGAAATATACAAGTCTCTAAATATAATACCTTTAAATAAAAGGTTATTTGTCCCTCTGATGTACTGAAAAACTGTAATTTTTCAGCTGAAAATTTTTTAATCTAACTTTGCTAGTTATTTTTATATTGCAATCTATATTACCAATTTAGGAAGTGATTTCTGAGTCTCTTACACTGTAAAGGTGCACTTT…	0.344145	4193
ABHD6	FALSE	FALSE	FALSE	TRUE	GGCCCCGACTGCAGCCTGCATTCTGCACACAGCATCTGCTCCCATCCCCCAAGTCTGACGCAGCCACCACTCTCAGGGATCCTGCCCCAAATGCGGTCGGAGCGCCAGTGACCCTGAGGAAGCCCGTCCCTTATCCCTGGTATCCACGGTTCCCCAGAGCTTTGGGGACCACGCGAAAACCTCCAAGATATTTTTCACAAAATAGAAACTCATATGGAACAAAATAAGAAACCCCAGCCATGAAATCTACCATGAAGTCTTCAAGTTCATGTCACTGAGAAGCTTGTGCAAAGCAGCCACCTTGGACCATAATTAAATCAAGGACATTTTCTTTGAGACATTCCTTATAGTTGGAGACTCAAGATATTTTTGTTGCATCAGGTGTATTCCCTTGCATGG…	0.448916	969
ABHD8	FALSE	FALSE	FALSE	TRUE	CCGCTGGGCCGGCGGGGCATCGCTTGGTGAGCACAGCCGCAGCAGGAGGAGGCCCGAGCCTGCGCCAGGTCTGCAGCGCAGACCACCTGGGCGGGCCGTTCGCTCCGGTGGGCGGGGCCAGGTCAGGGAGACGCCCCCAGGCTGCCTGGGCGGGGCGTGGCATCCGAGGGAGCCCAGCGGACATTCCGCTCTCCGCTTCCGTCCCGCGGGGCCCATCGGCGTTTTGGGGCCGCAGCCGGGACCCTCACGGAAGATGACCTTGTACAGAAGCTCTCCCTCACCTTCCCCCCAACGCCACGGCCAAGGCAGGCCCCCCACCCCGCTGTCTTCCGTGTCAGCCGTGCTTGATCCTGGGACCCACGAGCCCCACAGGGACCCTCGAGGCCCCATCCCGTTATC…	0.684906	530
ABI1	FALSE	FALSE	FALSE	TRUE	TTTTTTTTTTTCTTTTGAAGTAGATTCTTATTACTCAGTCATACTGTGGGACTATTATGGTTAACAGAACTGTCTTAATATGTTTTAAAATGTGCCCATATTTTCAGAACATGCTGTTTTATTGGTAAATTGAATGTCTACCTGTAAGCATAAATCTTTGAGGCAGTTTATGTATTGCTGAATAGCAATTTATACAAGAAGCTGTCCATAACTGATTATGCTTATGTACTTACTTACACATTTTTAACTTTATGACCAGCCTAAATATTCTGGGGGAAGTGGGGTATAATATTTAACGAATCATGATTCAGATTGTACCATTACATGTTTCAGTGCAGCATGGTTACTAACGCTATGTCAGACTAATATTAAAATCAGAAAATTTAAATGCTGGTGCTG…	0.306525	1977
ABI2	FALSE	FALSE	FALSE	TRUE	AGCTCAGCAGGGCTGTGCTTGCCTCACAGGAATAGTCAGGTCTTCCCAGATTATCTGAAGGCCCTGGGGATTCCACTCCAGTAAAGTAGAATGAAGGATACAAATGATAAAAATTACACTTTTTTTTTTGGTTTATTCCCCAGTATTAAAAACAAAGCAAGCTGAGTCTGAACAAATGGATCTTTCTGCCATCATTTGTACAATGCTGAGCTGTCTGGATTGAAATAAAATGACCATTTTTATGTATGTCAAAGGTATAACAGCATAACTGTGTAGCCAAAACAAAATCAGATTAAGACTGATTCAGAAAAATCTGGGATCTTTCTCAGGAATACTGTATACCCTTGGGATTTCTCCTCCTGCAGAATCTGTGGCATTGGATGTTCTTCATTGCCTGTG…	0.405675	20371
ABI3	FALSE	FALSE	FALSE	TRUE	CAGCCCAGGGCTCTCTGGGCAGCTGATGTCTGCACTGAGTGGGTTTCATGAGCCCCAAGCCAAAACCAGCTCCAGTCACAGCTGGACTGGGTCTGCCCACCTCTTGGGCTGTGAGCTGTGTTCTGTCCTTCCTCCCATCGGAGGGAGAAGGGGTCCTGGGGAGAGAGAATTTATCCAGAGGCCTGCTGCAGATGGGGAAGAGCTGGAAACCAAGAAGTTTGTCAACAGAGGACCCCTACTCCATGCAGGACAGGGTCTCCTGCTGCAAGTCCCAACTTTGAATAAAACAGATGATGTCCTGTGACTGCCCCACAGAGATAAGGGGCCAGGAGGGATTGAAAGGCATCCCAGTTCTAAGGCTGCTGCTAATTACAGCCCCCAACCTCCAACCCACCAGCT…	0.55098	510
ABI3BP	FALSE	FALSE	FALSE	TRUE	ATGCTGCACAAAGTTACCTTCTGTTTCATCATTGCAAACAAAAATCATTGAAAATACTATGCCGCATTCATTTAAAGCTATTTTGTTTACTATGTATAAAAGTCTACAATCTAATTAATAGCAATACTAGATGTTTATTATTAGAAAAGATTGCTGAGAGTATTTATCAGGTTTTACAAAGTCATTTTAAGAAAGCAAGATACTGATGTTAACAGAATAACATTTTTGGGGAAGCTGGCTCCCTATTCATGGTATTTTAAGAGATCATTTGTATATTATTTATCACACTGTTGTAATGATGTTTTGAGATACTTTTATAACAAAATTAACATCAAAAAGGTATATACTTTTTAAAAAAAATTTACTTTTATTGATGTGTACTCTTCCTATTGATGAGTT…	0.288275	1339
ABL1	FALSE	FALSE	FALSE	TRUE	CAGCAGTCAGGGGTCAGGTGTCAGGCCCGTCGGAGCTGCCTGCAGCACATGCGGGCTCGCCCATACCCGTGACAGTGGCTGACAAGGGACTAGTGAGTCAGCACCTTGGCCCAGGAGCTCTGCGCCAGGCAGAGCTGAGGGCCCTGTGGAGTCCAGCTCTACTACCTACGTTTGCACCGCCTGCCCTCCCGCACCTTCCTCCTCCCCGCTCCGTCTCTGTCCTCGAATTTTATCTGTGGAGTTCCTGCTCCGTGGACTGCAGTCGGCATGCCAGGACCCGCCAGCCCCGCTCCCACCTAGTGCCCCAGACTGAGCTCTCCAGGCCAGGTGGGAACGGCTGATGTGGACTGTCTTTTTCATTTTTTTCTCTCTGGAGCCCCTCCTCCCCCGGCTGGGCCT…	0.572791	1992
ABL2	FALSE	FALSE	FALSE	TRUE	CCACTGTTAGCCTGGTGGGAAAATGCACACATTTCTGAGGGGAGAGGGAAAAGGACTTGTTTTCCTGTGTTCTTGTTTTCAGAAAATGAAAGACTCATACTTGAGTGTGTTTATGTGAAGTACCTCAGATCCCTGAGTTCTCACGTTTACAGTTTCATCTCAAAAATAAGAAGCAAACCACATAAGTATAGGAGAGGTAAATTAAGTGGGGGCAAGGCAGTAGTGGACAGGGTTGGAAACTGCACTGGAAAATAGGGAACATGTGTATGTCATAAGGAAGGCAATGCAGCCCATCCCTACCTGGAATGCTGGGAAGTGCTAGGCAGGGCTGCTCTCAGCAAGACTGCAGCAGCTGCACCCAGACCTGGGGCTCTGGTAGGTACTAATGGTGATTATGCT…	0.417352	8391
ABLIM1	FALSE	FALSE	FALSE	TRUE	GTCCCACTCGTGAATGGCAATTAGAGAAAGGACTGACAGTGGCGGTGCCCCATAGGATGTCATATTGAGGCCCAAACTTGATTGGAGAATTTGCAAACTACCGTCGCTCAGCAACACCAAAAAGAGAAAGTCTGGTTAAAACACCATGAGTCAAATGTCGGGCCAGCCAACAGTAACACTTGCCAAGAAGCATGGCGTAGAAATTTCTATGTTCCGAAACACAGAGTAGTGTCCACATGTGAGCTTTTCACATTACCTTATGTATACAACAGGAGCTGCGTTGTTTTCTTCTTTTTCTTTTCCTTTATCTGTTGTCCAACAACAGTGCTGACTGTCCGGATAAGAGCTGGCAAGTGCCCTTAGGATGCCGCATGGGAAAAATCGGTTATCATAATTTCA…	0.431514	5147
ABLIM2	FALSE	FALSE	FALSE	TRUE	CGGCTGCCAGCCTGCCCCACTGGTGTGTGCCGGGCGCCGAGGCCAGGGGCCCCTGGCGAGAACCGCACACACCCCTCCCACACACCTTGCTCTGGCTTCTCTGTGTCCATGGGGTGGGCGGGAGGGGGTCCCCCAGCAGGTGCGGCCCCTGCACCTGCCGGCGACACTCCTGCCGGTAGTTTAGGGCCGAGACGGCTAGCTTCACGCCACCCTTCCCCGCTGTGGCTTGGTGTCAGGGAGAGGCTGTAGAGTGGCTGTGTCGGGCATCAGATGGAGCACACAGGTGGCTGCAGCCCAGCCCACCTTCCCAGCGTTCTCGAGGTGCCCTGGCCCCGGTGCTGGGCACGTGGGGGACAGAGGTGGCCGGGACGTGAGCTGTGAGGCTTGTTGATGATGGTT…	0.561383	1678
ABLIM3	FALSE	FALSE	FALSE	TRUE	AGAATGTGTGTGCCAAACGTGCTCCCAGTCCATGGCCAGCAGTAAGCCCATCAAGATTCGTGGACCAAGCCACTGTGCCGGGTGCAAGGAGGAGATCAAGCACGGCCAGTCACTCCTGGCTCTGGACAAGCAGTGGCACGTCAGCTGCTTCAAGTGCCAGACCTGCAGCGTCATCCTCACCGGGGAGTATATCAGCAAGGATGGTGTTCCATACTGTGAGTCCGACTACCATGCCCAGTTTGGCATTAAATGTGAGACTTGTGACCGATACATCAGTGGCAGAGTCTTGGAGGCAGGAGGGAAGCACTACCACCCAACCTGTGCCAGGTGTGTACGCTGCCACCAGATGTTCACCGAAGGAGAGGAAATGTACCTCACAGGTTCCGAGGTTTGGCACCC…	0.516139	3377
ABR	FALSE	FALSE	FALSE	TRUE	CCCGAGGCAGGGTGGCTGCGGGCGGGTGGTGGAACCAGCCCCTCCAGCCTGGGGTCCAACTCAGACTTGAAAGACTGCAATAGAAAACTCCCAAACCCAGCACTCCAGACTCGAGGGAAGCCAGCTTCCAAGAACTGGAATGCGTACGTCTTTTGTGCCACCTTGTACAAAGCCGGCTGCCCAGCCCCAGCCTCACCACCGCATCCCACCTCCTGCCCTCCATACCTCTAGTTGTGTCTGATGCTCCGTGCTGTTCGGGAATTGTTTTATGTACACTTGTCAGGCAGAAAAGGTAGTGACCGGCCCGGCGTGGGCACACAGACAGCCCGCTTTGTTCTTTCATTTCCTCCAGCACTTTCTTTCCGCCTGAGTCCAGCCCAAGGCCTTTTATTTTGCGCT…	0.571819	2562
ABRA	FALSE	FALSE	FALSE	TRUE	ACCTTCAAAAACAAAAGCCAAATTTGGCCCACTATGGTCTTAATGCTAAATGCTCATGTAGGTAAAATGAAAATGCAAACTCTCTGTAATAAGTTAGTAAATATTAAACAATTTTTACATAAACGACTTTCTGGCATTCTATTTCTATCTAGAATGAGGAATTTTGGAGATTTTGAGAAGGCACAAAGCATTTCAGAAAGCACATAGAATGTTAATGTATAATAATAGTATTAATAGTTGAAATTCCACAGGGTGTTTTTGTTTTTGTTTTGAGACAGATTCTCTTTATGTCACCAAAGCTGGTCTTTTAACTCCTGGCCTCAAGTGATCCTCTCACCTCAGCCTCCCAAGTAGCTGGGATTATAGGCATGAGCAACAGCACCCAGCCACTTGTATATT…	0.316602	1554
ABRACL	FALSE	FALSE	FALSE	TRUE	TGTGGTTTACATATCTTTATGTACTGCCATTTTTTGTTTCTGGTAAACTGGAATATAAAGTGAAAGAACAAACATTTGAACATACTTAATGTATTTTTATAGAACTTTGTAAACGAAAGGAGATTCATGTTTTAGAAGTCTGTCCTTTTTTATATCTTGAAAGAAAATCTATGTATGATGCTATAAAATAAATCCTATTATTTTTCTCAGGAATCTGGTTAGGAATTGCAGGCAATGAGATTTTTTGCGGGGCAGGGATGGGAATGTTTGTTCATAAATAATTAGACATTTTCTATAGATATTTGACATTCTGCGAAAGCAACAAGCAAACTGAAGACCAACTCCTATGAGAAATATTATGATGTTTATGTAATAAAGACATGTAACTGTCTTAAATTT	0.295739	399
ABT1	FALSE	TRUE	TRUE	FALSE	GGGCCTGGGTGGCCCCTTCCATTTCCTGGCCCTGCTCTGCTTCCTGTCTACCTCATACTAGAATGATCGTGACTACCCGGGCAGACATTTTACTGTGTTTCTCAGACCAAGTGTCTACTGATGGCCCAAACATGGAGTTTTGTGGGCTTCCACTGTCCCCACTCCGAACTCCTGTATGTGCCTGGCTGAGTCACCTAATTCATACTGTCATACTAGCATAATTATGACTATTGCATATGCTTGTTTTGTTTGACTCTTGGCTGCCTACGTCTGTAGGGTCCCCTGAAAATCCCACTTCCTGCCCCCAGAAAGGGCCTTTATTTCCAACTAGGAGGATAATGCCTAGTCCAGGCAATCTTTCTCTGTTTAGCAGTCACAGGTGAGGGTGGTATTAGCATC…	0.403525	2099
ABTB1	FALSE	FALSE	FALSE	TRUE	GCGCTGCCTCTATGGGGCACTGAGTGACCCCATCCGCCGGGCTCTACGCGATTACAAGCAGGTCACGGCTTCCTGCAGGAGGCGGGATTACTATGACGACTTCTTGCAGCGGCTTCTAGAGCAGGGCATCCACAGTGACGTGGTCTTTGTAGTACACGGGAAGCCATTCCGGGTGCATCGCTGCGTCCTGGGTGCACGTAGTGCCTACTTTGCCAACATGCTGGACACCAAATGGAAGGGCAAGAGTGTCGTGGTTCTCAGGCACCCACTGATCAACCCCGTGGCCTTTGGGGCCCTGCTGCAGTACCTGTACACAGGCCGCCTGGACATTGGCGTAGAGCATGTGAGTGACTGTGAGCGCCTGGCCAAGCAATGCCAGCTGTGGGACCTGCTCAGCGA…	0.620442	1673
ACAA1	FALSE	FALSE	FALSE	TRUE	GTGACATCCCGGAGACTGTGCCTTTGTCCACTGTCAATAGACAGTGTTCGTCGGGGCTACAGGCAGTGGCCAGCATAGCAGGTGGCATCAGAAATGGGTCTTATGACATTGGCATGGCCTGTGGGGTGGAGTCCATGTCCCTGGCTGACAGAGGGAACCCTGGAAATATTACTTCGCGCTTGATGGAGAAGGAGAAGGCCAGAGATTGCCTGATTCCTATGGGGATAACCTCTGAGAATGTGGCTGAGCGGTTTGGCATTTCACGGGAGAAGCAGGATACCTTTGCCCTGGCTTCCCAGCAGAAGGCAGCAAGAGCCCAGAGCAAGGGCTGTTTCCAAGCTGAGATTGTGCCTGTGACCACCACGGTCCATGATGACAAGGGCACCAAGAGGAGCATCA…	0.552366	1289
ACAA2	FALSE	FALSE	FALSE	TRUE	AGAGACCAGTGAGCTCACTGTGACCCATCCTTACTCTACTTGGCCAGGCCACAGTAAAACAAGTGACCTTCAGAGCAGCTGCCACAACTGGCCATGCCCTGCCATTGAAACAGTGATTAAGTTTGATCAAGCCATGGTGACACAAAAATGCATTGATCATGAATAGGAGCCCATGCTAGAAGTACATTCTCTCAGATTTGAACCAGTGAAATATGATGTATTTCTGAGCTAAAACTCAACTATAGAAGACATTAAAAGAAATCGTATTCTTGCCAAGTAACCACCACTTCTGCCTTAGATAATATGATTATAAGGAAATCAAATAAATGTTGCCTTAACTTCAGTTAATATTTTCCTGTCATTTATATTTTTAAAAATTTTAAATTGTGATAAGATACA…	0.397619	1680
ACACA	FALSE	FALSE	TRUE	FALSE	GAAGAGCTTCCTGCCTGTCCCTGCCCTGTCTCTGGAGAAAAGGGCTAGAGCTGCCTTTTACAACTGTAACCACTGTAATGAGAAGGCACAGGAGACCCAGCACTGGAGTCAAATGGCATTTTACTTCCTCTCGTTTCAGGTTATGCATGACATCCTGGGATGTAAGATCACAGAATCCCCCTCCAGCCCACCAGTCACACCTACCCCATTCAGTATTTATTACCCTGGCCAGGCCTAGTCCTCCACTCCCTGCACAGGACTGAGAAGGCAATGAAAGGTACAAACATGTACCATGAGGTCTTACTAACCAAAGTAGGGCTGCCCCTCCTGTCCTGACAGCCCCTTGGCCTCCCAGCATGGGGAAGCGTGAGGAGTTGCCCAGCAGTGAGCAGCCCCCCT…	0.496134	2328
ACAD10	FALSE	FALSE	FALSE	TRUE	AGCCTTGGGGCTGCAGTGGCTCAATGTCCTGGCTGGTCCAGCTGTGCCCAGATCTGTCACTGATGTGCCTCGAAAGATCCGGTGTTTGTGGCTCCTGCACCCTGCTCAGCAGCTCTGTCCCGGGACAGTCAGGGTGGACTCAATCTTTCTGGTTCTCCACAGAAGACGTCTCTGCAAGAAGCCTGGAGTCTGTTTCAGGCCAGGAGGAGGGGATTTGCTGAGGGCCAAGGGGGTTCTGGGACAGAGTCTGGAAAGCTGGTCTTCAGGCTCTCAGTCCCAGGCTGGGCAGGCACGGTCACTTCACTTCAGCCTTTCAGTCCCTCTCTCTCTGCCTGTGGGAATCTGGACACATTTTGGGAGGCCTCCCAAGGCTGTGGGACGTGCTTGCTCTGGCAGCTG…	0.5625	624
ACAD11	FALSE	TRUE	FALSE	TRUE	CAGAACCTGATGTAGCTTCAAGTGATGCCACGAATATTGAATGCAGCATCCAACGAGATGAAGATAGCTATGTAATTAACGGCAAAAAATGGTGGAGCAGTGGAGCTGGGAATCCCAAGTGCAAAATTGCAATTGTTTTGGGAAGAACTCAAAATACTTCTCTCTCCAGACACAAACAGCACAGCATGATTCTTGTTCCCATGAACACACCTGGAGTAAAAATAATAAGGCCTTTGTCAGTTTTTGGCTACACAGATAATTTTCATGGAGGACATTTTGAGATCCATTTTAATCAAGTGCGAGTTCCTGCCACAAATCTAATACTAGGTGAAGGTAGGGGATTTGAAATTTCCCAAGGCCGCCTTGGACCTGGCAGAATCCACCACTGTATGAGAACAG…	0.452759	1323
ACAD8	FALSE	FALSE	FALSE	TRUE	TACCTCTGTCATTTTTGAAGCCTTGGCTACAGGCTGCACCAGCACCACAGCCTATATAAGCATCCACAACATGTGTGCCTGGATGATTGATAGCTTCGGAAATGAGGAACAGAGGCACAAATTTTGCCCACCGCTCTGTACCATGGAGAAGTTTGCTTCCTACTGCCTCACTGAACCAGGAAGTGGGAGTGATGCTGCCTCTCTTCTGACCTCCGCTAAGAAACAGGGAGATCATTACATCCTCAATGGCTCCAAGGCCTTCATCAGTGGTGCTGGTGAGTCAGACATCTATGTGGTCATGTGCCGAACAGGAGGACCAGGCCCCAAGGGCATCTCATGCATAGTTGTTGAGAAGGGGACCCCTGGCCTCAGCTTTGGCAAGAAGGAGAAAAAGGTGGG…	0.548928	1073
ACAD9	FALSE	FALSE	TRUE	FALSE	CACTCCGGATTCCTGAGTTCCAGGAAAACCTTCCCAGAGAAAGGAAAGAAGTTTTCCCATTTCCAGAAGTTAGCCAAGATGAACTTAATGAAATCAATCAGTTCTTGGGACCCGTGGAAAAATTCTTCACTGAAGAGGTGGACTCCCGAAAAATTGACCAGGAAGGGAAAATCCCAGATGAAACTTTGGAGAAATTGAAGAGCCTAGGGCTTTTTGGGCTGCAAGTCCCAGAAGAATATGGTGGCCTGGGCTTCTCCAACACCATGTACTCAAGACTAGGGGAGATCATCAGCATGGATGGGTCCATCACTGTGACCCTGGCAGCGCACCAGGCTATTGGCCTCAAGGGGATCATCTTGGCTGGCACTGAGGAGCAGAAAGCCAAATACTTGCCTAAAC…	0.531731	2080
ACADL	FALSE	FALSE	FALSE	TRUE	ACATCTGCCCACATCCTGGAGTCCTATTACAGCTAATCTCGTTTTAAATCTGCTCAAGATAAAATGTAACTTGGAAAGCGAGGAAACACTAAACATGTTTTTACCTGCTCTCTCTATAGAGAAGGAAATAAAATATAAATATAAGATTAACACAGTGGAAGGACAAATCTTTGAAGCCAAAATTCTAGTTTTCCAATATAAGGTTTAACTTACAGTTTTTTATGTAGCCAAAGGTAAACGGTTTTCTGAATCTTGCCTAGGTGTTTCATTTATCTCTAAAATTCTAAAAAGCATAAATCATTCAAATCTTCAAACCAAGGCAGAAATAATTTTATGTCGCTATAGTATAAAAACATTAATAAGATAGCACATTGACTTTTAAAGGGAAAAGTAAATATA…	0.318982	1022
ACADM	FALSE	FALSE	FALSE	TRUE	TTAGAAGAGCCTGGGAACTTGGTTTAATGAACACACACATTCCAGAGAACTGTGGCTTATTGTGTAACAGAACCTGGAGCAGGCTCTGATGTAGCTGGTATAAAGACCAAAGCAGAAAAGAAAGGAGATGAGTATATTATTAATGGTCAGAAGATGTGGATAACCAACGGAGGAAAAGCTAATTGGTATTTTTTATTGGCACGTTCTGATCCAGATCCTAAAGCTCCTGCTAATAAAGCCTTTACTGGATTCATTGTGGAAGCAGATACCCCAGGAATTCAGATTGGGAGAAAGGAATTAAACATGGGCCAGCGATGTTCAGATACTAGAGGAATTGTCTTCGAAGATGTGAAAGTGCCTAAAGAAAATGTTTTAATTGGTGACGGAGCTGGTTTCAAA…	0.361177	1257
ACADS	FALSE	TRUE	FALSE	TRUE	GCCCGCGGCGGACTGCCCCAGGACTGCGGGAAGGCGCGGGAGCCAGGGGCCTCCACCCCAACCCCGGCTCAGAGACTGGGCGGCCCGGCGGGGGCTCCCTGGGGACCCCAGATGGGCTCAGTGCTGCCACCCAGATCAGATCACATGGGAATGAGGCCCTCCGACCATTGGCAGCTCCGCCTCTGGGCCTTTCCGCCTCCTCACCACTGTGCCTCAAGTTCCTCATCTAAGTGGCCCTGGCCTCCTGGGGGCGGGGTTGTGGGGGGGCTGAGCGACACTCAGGGACACCTCAGTTGTCCTCCCGCGGGCCCTGGTGCCCTGGCATGAAGGCCCAGTGCGACAGGCCCTTGGTGGGGTCTGTCTTTTCCTTGAGGTCAGAGGTCAGGAGCAGGGCTGGGG…	0.6625	560
ACADSB	FALSE	FALSE	FALSE	TRUE	CGTCTATAGGAGTGGGACCCCTCCCTGGTGTCACTGCTGTAAAATTTTAAACGGTTGTGTCTTGTTGGGAGTAAGTGCCTTGCGTGGGAATAAACTTCCACAGCATTCGAATATTTTAATGAAGCCCTTAGTCAGGGTCCTGGTGTTGGCCTTTTTGGTTTTCTCTTTTCAGGCTGTTTAACTTAGGCACAGGAGATCCACTTTTAAACTTGGGAAATAAGCACCTGTATTTTTTTCCAAAACTGTTTTTAAAGCTGTATACGCATACATATATATATTTTTACTCTGTCTTACTCTGTCACCCAGGCTAGAGTGCAGTGGCGCGATCTCAGCTCACTGCAGCCTTGACCTCCTGGGTTCCAGTGATTCTCATGCCTCATCCTCCCAAGTAGCTGGAAC…	0.376375	4546
ACADVL	FALSE	FALSE	FALSE	TRUE	ACCCCCACTCCCCACAGCTCGCGGCTCACGGCGCTCCTGGGGCAGCCCCGGCCCGGCCCTGCCCGGCGGCCCTATGCCGGGGGTGCCGCTCAGCTGGCTCTGGACAAGTCAGATTCCCACCCCTCTGACGCTCTGACCAGGAAAAAACCGGCCAAGGCGGAATCTAAGTCCTTTGCTGTGGGAATGTTCAAAGGCCAGCTCACCACAGATCAGGTGTTCCCATACCCGTCCGTGCTCAACGAAGAGCAGACACAGTTTCTTAAAGAGCTGGTGGAGCCTGTGTCCCGTTTCTTCGAGGAAGTGAACGATCCCGCCAAGAATGACGCTCTGGAGATGGTGGAGGAGACCACTTGGCAGGGCCTCAAGGAGCTGGGGGCCTTTGGTCTGCAAGTGCCCAGT…	0.571975	2091
ACAN	FALSE	FALSE	FALSE	TRUE	AACCAGCACAACGCAGGCTTTGACCCCAAGGCAAGGTCATCCTTCTAAAGTTCCCCAGAGACAAGTAGAGATAAATAAGAACTTGAGCTGGTATTTATGTCTACTAGAAATGAAGCAGACCTGAATTTGAGTTATGGCTCTGCTACTTAATAGCTGTGTGAAAATGGAGATATAATGGTTCCTACTTCAGAGAGAGCTGCAAGAATTAATTAAGTGCACGTGGTGCCCTTGGCATAGTGCCTGGGACACAGTAAATGCTCAATAAATGTTAGCTTTATTTCATATACATATCTATATGTAAAGCTGTAATATATAGCTTTATTTTGTACAACCTGTAATTTGTACACTCTTGTCAAATTCTCTCCTGCTTGCAAATATTTTTGTGATGAGTTTAGTCAA…	0.444242	1650
ACAP1	FALSE	FALSE	FALSE	TRUE	CCCGAGGCCCACGGGGCCCGCGCCTGCCTCCCTTCCCCGCCACCGGGCCCTCTGCCATTAAAGCCTCCGTGCTTCGCTCTTCC	0.73494	83
ACAP2	FALSE	TRUE	FALSE	TRUE	ATTTTTTTAAAAATGGGAAAATATGAAATCTGGTGACCCCCTAATGTATACAGCTAAAAAATCACAATTTTTTTACTGCTTTAATTCTACTTAATTTTGGTAGATATTGAATGGCTTGGAAAAGAGGTACCCATTCATATATTTATAAATTAAAACATAGTTATCTAGTAGTAGGAGAGGAACCTAGTTTAGGACCTCTTTTATTAAAAAAGCCTATTTAAAGGGCTATTTCTGTAGACAGAAGTTCAGTCTAGATTTAGGCCATCTCTAGGTTACAAGATGATAGGAGGTTAGACAAAAGTGATTCTTTTGCCAATGGGTGGTGGCATTGATTTTTTTCCTCCATGCATCTTGCCCAGGATCACTCAGTCAAGCATGTCTTCATCAAGTGGAAGCCAA…	0.332317	4592
ACAP3	FALSE	FALSE	FALSE	TRUE	GGCCGGGCAGGCCGGGCAGCTGCCACCCCGCCCGGCCCGACGCCCCGCATGCCCCGAAGTCCCTGGCGCCCACCCGGCCGCGGCCCTGCGTGTGACCCGCGGGTCGATACCTGGCAGCCCCAGTGCTGGGGCGCCGCGGCCCTGCTCGCCCAGGAGGAGAGCGAGGGCCCCACACTGAGTCTCTTGAAGCCTCACGTTTCCCTGGGGGGGTGCTGCATCGTCGGGTGTCCCTCACCCCACCTGGGGAACCTCTGTCTTCAGGTCACCCCTTTTCAGGGGCCTGGGTTGCTCATGTCACAAGCCACTTTTAAGGCCCGTGTCACCTGTGTCCCTGTGTCCTCAGGGCCTGTGTTACTTCGTGCCCCACTTCTGCCCAGAACACTGACCTGTTAGCTGGCT…	0.662458	1188
ACAT1	FALSE	FALSE	FALSE	TRUE	AGATTTGATTGTAAAAGACGGGCTAACTGATGTCTACAATAAAATTCATATGGGCAGCTGTGCTGAGAATACAGCAAAGAAGCTGAATATTGCACGAAATGAACAGGACGCTTATGCTATTAATTCTTATACCAGAAGTAAAGCAGCATGGGAAGCTGGGAAATTTGGAAATGAAGTTATTCCTGTCACAGTTACAGTAAAAGGTCAACCAGATGTAGTGGTGAAAGAAGATGAAGAATATAAACGTGTTGATTTTAGCAAAGTTCCAAAGCTGAAGACAGTTTTCCAGAAAGAAAATGGCACAGTAACAGCTGCCAATGCCAGTACACTGAATGATGGAGCAGCTGCTCTGGTTCTCATGACGGCAGATGCAGCGAAGAGGCTCAATGTTACACCACT…	0.402432	1809
ACAT2	FALSE	FALSE	FALSE	TRUE	ATTGCTTAAACTTTGAACAACCTCAATTTCTTTTTAAACTAATAAAGTACTAGGTTGCAATATGTGAAATCAGAGGACCAAAGTACAGATGGAAACCATTTCCTACATCACAAAAACCCAAGTTTACAGCTTGTACTTTACTTTAATGTGTAATACTCAACTCAAGGTACAAGACAATTGCATTTAACATTGTTATAAATAAAAGGAACATCAGATCAATCATTAA	0.300885	226
ACBD3	TRUE	FALSE	FALSE	TRUE	AAATGTTGTTACAAAGTCTGGAGTCTAGGGTTGGGCAGAAGATGACATTTAATTTGGAAATTTCTTTTTACTTTTGTGGAGCATTAGAGTCACAGTTTACCTTATTGATATTGGTCTGATGGTTTGTGAACTCTTGCTGGGAATCAAAATTTCCTTGAGACTCTTTAGCATTCATACTTTGGGGTTAAAGGAGATTCCTCAGACTCATCCAGCCCTTGGGTGCTGACCAGCAGAGTCACTAGTGGATGCTGAAGTTACATGAGCTACATGTTAAATATTTAAAGTCTCCAAAATAAAACACCCCAACGTTGACCTTACCCGGCTGATGGTTAGCCCCTTGCTGCCTGCTCCATGTGTCTTATGAGAGCCCGTAGTTACAGTGTCCTCTAATTTGAAATC…	0.329363	1931
ACBD4	FALSE	FALSE	FALSE	TRUE	CTGTCAGTGGAGGGGTCTCTGCAGCCAACTGAGACTATCTTGCTGTGCCCTGAGCCTTCCTAGGGTTTAGAAGAACAGCATTCAAAATTCCCCGTCCTGTCAGTGTTTGCCTTCGCACCTCCTCCCCTAAAGCAGCGCGGGGGGCAAATAAGACCCCACCCCTCCCTGCAGCTTCACAGGGACGCTTCCTTCCCTCCCCGCAACCACCCCAGGCTCCCCTGGGAGGCTGCAGTTGTGGTACACGTCCCCGGTGCTGGGTTGGCCGTGACTCGGGGGCGGGGCGATCGGGTCTCAGCCCCTGCCTTCCCCAGTCTCTGGGTCACCCGAATTTTCCCACCCCTGCTTCTCCCCGAGGAGGTTGAGCTCTTGAGCAAGTTGGGACTTGGGCCGGGGCCTGGA…	0.611475	610
ACBD5	FALSE	FALSE	FALSE	TRUE	GGAAAATGGTGTTTTCCTCAAGAAGACTACTGGAACTGGATGACCTCAGAATGAACTGGATTGTGGTGTTCACAAGAAAATCTTAGTTTGTGATGATTACATTGCTTTTTGTTGTCCAGTAGTTTAGTTTGTGTACATATATACACATATATATTTTGCACTACACAAACGATAACATTTTAAGGACTAATATTGCTGATACTTGAATAATCAATCTCTACTAGGTTATAAGTAGTATACACAGATTTACCCTGCCCTTGAACTTGAAGGACATTAAATTATTAATGATCATTTGGTAACATGTTTACCTGATTATCTTCCATAGAGTAACATAAGCTGCTTTTCAAAGGTACCATTGTGATAATGAGATCAAATTTATAAGTTATTATTTTTAATTTT…	0.344765	2216
ACBD6	TRUE	FALSE	FALSE	TRUE	CCTTCTGGACTTGTCGTGGGCCAGAGGGGAGCCCACTGCCCTGAAGGGACAATGAAGGCCAAACAGCTCTACATTATGCCTCTGCCTGTGAGTTTCTGGATATTGTAGAGCTGCTGCTCCAGTCTGGTGCTGACCCCACTCTCCGAGACCAGGATGGCTGCCTGCCAGAGGAGGTGACAGGCTGCAAAACAGTTTCTTTGGTGCTGCAGCGGCACACAACTGGCAAGGCTTAATCAAAAGACTGGAAAACTGCAGTCTGTAATAGCATAAGGCTTCCATTATGAAAGAAAACTACAAAAATAATACTTCTTTTCCACCCGTCTTTGCTGAGTAGAATCCTGGGCCCAAGGGGAAAGGACAGGAAAGCAATGGAACACCGACTGCGGAGCTTCCATTTGT…	0.504336	3805
ACBD7	FALSE	FALSE	FALSE	TRUE	AATACAGCATATGAGGAATTTTTCCTTTTGAAGACTTCCAAATGCTATCATGACCTAACATTTAGAGGGAGAGGCATACTGTTAACTTGATGTATCATGTATATTTTTGCTATTAGCATGAGCTGTAGTACTTAGAAGTATACTGAAACTACATAGTTAACTCAATTGTACTTGCTTAAACCAGGTGTCTTTAAAAGTTCTTTTTAAGAAAATGTGGCACATATACACCATGGAATACTATGGAGCCATAAAAAGGGATGAGTTCATGTCCTTTGCAGGGACATGGATGAAGCTGGAAACCATCATTCTCAGCAAACTATCACAAGATCAGAAAACCAAGCATGTTCTCACTCATAAGTGGGAGTTGAACAATGAGAACACATGGACACAGGGAAGGGA…	0.427011	1007
ACCS	FALSE	FALSE	FALSE	TRUE	GCTGGTCATTGTCTCGTGGCCAGAGGGCCCAGCAGCCACTGTGGACCTGGGGCGTTCTGGGGCTGCAGAAGACTGACTGTGGATGTGCCATTTGCCAGGAAGGTATCTAACTTGGCTTTGTGCCTGAAGAACTGTTTCTTGTCTTTCGCTGTAGCAGTGGGAAACTCCTTAAGCTGTGGTTCAGCCTGGGCCCTCCCTCTCTCCTATTAAACAAAACTAGGAGAGTCCATATGTCTCCATTGTGAGTTATTTAGAATGGAGGAGTCGTGACTGCTTCTAACCAGAGCCTCAGCCCCCCTGAGGATGTGAAAAGAAAACAAACAACTTGTACCTTCTTTCTGATATCACCGTCATTCCTCTTTCTTTGTCACCAAGGAAACGAGTCAAAGGAACAGCACA…	0.483412	422
ACCSL	FALSE	FALSE	FALSE	TRUE	TCTTGGATTCCTTCCATCTCCAGGGTTTCATTAACCTTGGCACCAGTGAGAACAAGCTCTGCATGGATCTGATGACTGAAAGATTGCAAGAAAGTGACATGAACTGCATTGAGGACACCTTGCTTCAGTACCCTGATTGGAGAGGGCAGCCATTCCTGCGGGAAGAAGTGGCCCGGTTCCTGACCTACTACTGCAGGGCACCTACCCGACTTGACCCAGAAAATGTGGTGGTTCTAAATGGCTGCTGCTCTGTCTTCTGTGCCCTGGCCATGGTTCTGTGTGATCCAGGCGAGGCCTTCCTGGTCCCTGCTCCCTTCTATGGTGGCTTTGCCTTTAGCTCCCGCCTGTATGCAAAGGTTGAGTTGATTCCTGTCCACCTGGAGAGTGAGGTCACTGTTA…	0.505573	1256
ACD	FALSE	FALSE	FALSE	TRUE	GAGGCCCCGCGCGGCTCTGGAGGGAGGAGAAGGAGTTCGGCTTCCGCGGGACAGAGGGCCGGCTGCTGCTGCTGCAGGACTGCGGGGTTCATGTCCAGGTCGCTGAGGGCGGCGCGCCCGCAGAGTTCTATCTCCAGGTGGACCGCTTCAGCCTGCTGCCCACGGAGCAGCCCCGGCTACGGGTGCCTGGTTGCAACCAAGACTTAGATGTTCAGAAAAAGCTCTATGACTGCCTTGAGGAGCACCTTTCAGAGTCCACCTCGTCCAATGCAGGCCTATCACTGTCCCAGCTTCTGGATGAAATGCGGGAGGACCAGGAGCATCAGGGGGCACTCGTGTGCCTGGCTGAAAGCTGCCTGACACTGGAGGGCCCTTGCACAGCACCCCCTGTCACCCACT…	0.63101	832
ACE	FALSE	FALSE	FALSE	TRUE	GGGCTGGAGCTCAAGGCATTCAAACCCCTACCAGATCTGACGAATGTGATGGCCACGTCCCGGAAATATGAAGACCTGTTATGGGCATGGGAGGGCTGGCGAGACAAGGCGGGGAGAGCCATCCTCCAGTTTTACCCGAAATACGTGGAACTCATCAACCAGGCTGCCCGGCTCAATGGCTATGTAGATGCAGGGGACTCGTGGAGGTCTATGTACGAGACACCATCCCTGGAGCAAGACCTGGAGCGGCTCTTCCAGGAGCTGCAGCCACTCTACCTCAACCTGCATGCCTACGTGCGCCGGGCCCTGCACCGTCACTACGGGGCCCAGCACATCAACCTGGAGGGGCCCATTCCTGCTCACCTGCTGGGGAACATGTGGGCGCAGACCTGGTCCAAC…	0.616719	1902
ACER1	FALSE	FALSE	FALSE	TRUE	GACCTGCCAGCCTCTTGACTATCCAACCACCCAACAACTTGCCTGTGTCTTGAGAAGATAGCCCCGGTCAGGACTTGCACCTGCGGGACACTCGTGGTTCCTTCCTCTGTTTCCCCTTCCGTGTCCTCCTTGTCCTGCGCTGCCCTGCCTTGAGGCAGATGATGGACTTTGTGACATCTCTGAGCAGCAGCCTGGTGACTGTGGGGGGCTGTCTCGTGCATCTCCCCTCCATGACCCCCCCCATCCTCTTTCATTTCCTCCTCTGTGTCCACAGCCTCCCAGTGACCATTGTCACATGAGCTGGTGGGACTGTGTCACCAGGTACTGGGGTGACTGAAGGATGTGGCATCTAAATATTAGCTTCTAGGCTGGGAACGGTGGCTCACGCCTATAATCCCA…	0.555944	572
ACER2	FALSE	FALSE	FALSE	TRUE	TGGCAAGATGGTGGCTGGCTTCTCTGCTTATCGCCCCTCATGCAGTGGGCTTCCTTTGCTAGGAAGACAGCCAAGGGAGTTCGAATAGTTGGGGTGTGGGCTATCTTTTCAAAAATCTATTTGCTGGGGCTCTTAATTTCTTTAGTGTTCTTTGTATGTAGGGATTTAAACTTTGTCATATGGTACAAATATTCCCTGCCCCCCTGCAGTTTCCCATTTGTCTTTCAGTATGTTAATATTTTTGTGCCATACTGGTTTTAAACTTTCATGTTGTCACATCTGTTAATCTTTTCTTTAGGATTTCTGGATTTTGTGTAATTTTTAAAAAGGTCCCCTCCTCCTCCCTAATGTGTCTGTGGACCACCTGGATTCCACTGTACAAGGGGAAAAGTGTCTATT…	0.449422	1384
ACER3	FALSE	FALSE	FALSE	TRUE	TGAATCATTCCACCAAGAAAACAAACAAGCACCTACCATAGACCTGGCAGAATAAATAAGGAAATCCTTAAAGATCTACAAGTTCAAATATGTCATGACCATCACAGCAGAGGAGTGACTTTCTGACTAATGCTGCCACCCACACAGAGAATAAGGAGTAGGGCCTGCTGGGTGTTTAGCTCATGGCTTTATCTTATTTGTCCCCCTCCTCCTTTCACGCTCCAGTTTATAAAGAAACAGAGATGATGTGTGTGTATGCCTCAAATGCAGAAACAGTTGGGCTTTTCTTAACAGGTTAACAGTTTGTGCTGGTTATAAGAAATTAACCTTCTTTTCTTTTTGCCAAGGGTTGCATGTGAATTATACCTTTCTTAATATTTGATTAAATAATGCAGTCAG…	0.375734	6470
ACHE	FALSE	FALSE	FALSE	TRUE	GCGAGGACTGCCTGTACCTCAACGTGTGGACACCATACCCCCGGCCTACATCCCCCACCCCTGTCCTCGTCTGGATCTATGGGGGTGGCTTCTACAGTGGGGCCTCCTCCTTGGACGTGTACGATGGCCGCTTCTTGGTACAGGCCGAGAGGACTGTGCTGGTGTCCATGAACTACCGGGTGGGAGCCTTTGGCTTCCTGGCCCTGCCGGGGAGCCGAGAGGCCCCGGGCAATGTGGGTCTCCTGGATCAGAGGCTGGCCCTGCAGTGGGTGCAGGAGAACGTGGCAGCCTTCGGGGGTGACCCGACATCAGTGACGCTGTTTGGGGAGAGCGCGGGAGCCGCCTCGGTGGGCATGCACCTGCTGTCCCCGCCCAGCCGGGGCCTGTTCCACAGGGCCG…	0.655411	1303
ACIN1	FALSE	FALSE	TRUE	FALSE	TGCCGCCTCTTCCTCTGGACCCACCCGCTGCTACTGAGCTGCCCAATCAGAGCCAAGTCTGCTATCCAGGTGTCTTGGCCAGAGGGGGGCATGTATATGGGCTCCTGTGATGGGCCCCCTTTTGCCTCCCTGTCTTGCTTACATCAGGGGGCCAAGAAGAACACTGTTCTGGAGAGACTTGTATTGAGCAAGCAAAAAACATTTGGAAAGGGGTGGACTTGCATCATCTCCCTACTTGGGACACCCCAAGAAGAGCTTGTGCCAGTGCTGGGGCGCCTGCCCACATGCCCTTGCCCTTTTGAGGACTGTGGGTTGCCTTGTTTGCTACAGACTGTTGGGATCCCCATCTAGGGCACCAAGACCTCCTAAAGTTTGTGATCGCAGTGCCATGCTGTAAAA…	0.55656	3430
ACLY	FALSE	FALSE	FALSE	TRUE	CAGAGCCAGGAACCCTACTGCAGTAAACTGAAGACAAGATCTCTTCCCCCAAGAAAAAGTGTACAGACAGCTGGCAGTGGAGCCTGCTTTATTTAGCAGGGGCCTGGAATGTAAACAGCCACTGGGGTACAGGCACCGAAGACCAACATCCACAGGCTAACACCCCTTCAGTCCACACAAAGAAGCTTCATATTTTTTTTATAAGCATAGAAATAAAAACCAAGCCAATATTTGTGACTTTGCTCTGCTACCTGCTGTATTTATTATATGGAAGCATCTAAGTACTGTCAGGATGGGGTCTTCCTCATTGTAGGGCGTTAGGATGTTGCTTTCTTTTTCCATTAGTTAAACATTTTTTTCTCCTTTGGAGGAAGGGAATGAAACATTTATGGCCTCAAG…	0.392461	902
ACMSD	FALSE	FALSE	FALSE	TRUE	CTGAATTTACTACAAAGGCAAACTTTCAAAAGGATATCTCATTTTTGTTTCTAAATATGTATCAACAGGTATCAACAAAATCCTATTTTGAACTATTTTACTCAGAAATGAATGTCCCAAATATCCTAAATTATTCATAATAAAAATGATTTGTAAGTGTTTTCATTCTGAAAA	0.252874	174
ACO1	FALSE	FALSE	FALSE	TRUE	GAGACGTGCACTTGGTGCTGCGCCCAGGGAGGAAGCCGCACCACCAGCCAGCGCAGGCCCTGGTGGAGAGGCCTCCCTGGCTGCCTCTGGGAGGGGTGCTGCCTTGTAGATGGAGCAAGTGAGCACTGAGGGTCTGGTGCCAATCCTGTAGGCACAAAACCAGAAGTTTCTACATTCTCTATTTTTGTTAATCATCTTCTCTTTTTCCAGAATTTGGAAGCTAGAATGGTGGGAATGTCAGTAGTGCCAGAAAGAGAGAACCAAGCTTGTCTTTAAAGTTACTGATCACAGGACGTTGCTTTTTCACTGTTTCCTATTAATCTTCAGCTGAACACAAGCAAACCTTCTCAGGAGGTGTCTCCTACCCTCTTATTGTTCCTCTTACGCTCTGCTCAATGA…	0.439244	4658
ACO2	FALSE	FALSE	TRUE	FALSE	GGGCAGTGCCTCCCCGCCCCGCCGCTGGCGTCAAGTTCAGCTCCACGTGTGCCATCAGTGGATCCGATCCGTCCAGCCATGGCTTCCTATTCCAAGATGGTGTGACCAGACATGCTTCCTGCTCCCCGCTTAGCCCACGGAGTGACTGTGGTTGTGGTGGGGGGGTTCTTAAAATAACTTTTTAGCCCCCGTCTTCCTATTTTGAGTTTGGTTCAGATCTTAAGCAGCTCCATGCAACTGTATTTATTTTTGATGACAAGACTCCCATCTAAAGTTTTTCTCCTGCCTGATCATTTCATTGGTGGCTGAAGGATTCTAGAGAACCTTTTGTTCTTGCAAGGAAAACAAGAATCCAAAACCAGTGACTGTTCTGTGA	0.492021	376
ACOT1	FALSE	FALSE	FALSE	TRUE	ATTTTATTTGATCATGTGGCCTCTCTGTTGCTAATCTCTCCTGGAAACATCTGCCACATTTAGTGTGTGTATGTGTATTCATTCTTTCTCATAACTTCTTAAAGTTTCTTCCCCTCATTATTAAAATGAATTTACCAGT	0.338129	139
ACOT11	FALSE	FALSE	FALSE	TRUE	AACCTTATCATGAGCCAGATGCCAAGGAAGAGACTCTGGGAGGATCCAGAGGACCCCCTGGTTGCAGCCACGTAGAGACTGACGCTGAGGAGGACTCCAACTATCATGAGCAACACCCGTCGAACACAGCCACCCCGCTAAGAACAGATCAAGAAGCTGTCACAGATGGCGGAAGAAAACCTGAGGAAAGCGGGACAACCAGTCACAATGAATAATTTAATGGTAGCTATGATAGCAGTTATCACCACTGCCGTGAGTATTCCTTCAATAAGGGCTGGTAATAATGCCTGGATGCAATCATTCTATGACACAGTTACACATGCTTTCTGATCTCAGTATTTACCATAATAAATCGGCTCCTATAATTGAGGCATACCACCCTCAAAAACCTATTTGTAA…	0.45037	4463
ACOT12	FALSE	FALSE	FALSE	TRUE	AGGTCAACTTTCAATTACTGGTAATTTAATTTCCCACTTTTAATTCCAAGCACCCTTAGCCCTGACATCTGTCAAGCTTTGGGGCCACAAAATAATTTAATATAACCCTAAGCAAAATGCAGTGACGGAGTTAAAAAACAAAATGCATCTTAAGTCAAATACCAGTGATTTGGATTAGCATTAAAAGAGCTTTAGAATTCTGTTGTAAGTCATCTGTGGCTCTGCCTCTTCCAGGGGCACAGATAGTGGAAAATTGCCTGTATGCAGTACTATGTGTTCTATAAAATGGCATGAATTTAGTTTAAATTATCGTAAACATTTTTAGGTTACAGAGGTGAAACATGCATTCTGTGTGAAATTCCAAAAAAAAAATTATAAAATCTAAAATG	0.339332	389
ACOT13	FALSE	FALSE	FALSE	TRUE	GAGAACAGCAGAATGACCTAAAGAAACCCAACAATGAATATCAAGTATAGATTTGACTCAAACAATTGTAATTTTTGAAATAAACTAGCAAAACCAGAAGCAGCTAGAAATATTCTTGGAGGAAAAGGACCTGGATATCAAGTAGGGTAAAGGTGGGGGTGTCTTTTTTCACTTTAAGCATCTTGTTTTCTAATCATGTGTGATAATTGGGTGAAAAATTCTTAGCTCAAAGTGTTTTAAAAACAGGTAAAGCAAAGAAACTAGCAGGACCACTCTCAGTTAAGATTAAAACTAAAGTCCAGTGTTAAGCTAAAGGAGAAATAGAAATTAATGGTTCTAATTCTGTTTGGGCTGCTAGGAACAACAGAAATTTTTCATGGTTCTAGAAGCTGGAAAGTC…	0.40087	3450
ACOT2	FALSE	TRUE	FALSE	TRUE	TGGCTCTGGCTTATTATAACTATGAAGACCTCCCCAAGACCATGGAGACGCTCCATCTGGAGTACTTTGAAGAAGCCATGAACTACTTGCTCAGTCATCCCGAGGTAAAAGGTCCAGGAGTTGGGCTGCTTGGAATTTCCAAAGGGGGTGAGCTCTGCCTTTCCATGGCCTCTTTCCTGAAGGGCATCACGGCTGCTGTCGTCATCAACGGCTCTGTGGCCAATGTTGGGGGAACCTTACACTACAAGGGCGAGACCCTGCCCCCTGTGGGCGTCAACAGAAATCGCATCAAGGTGACCAAAGATGGCTATGCAGACATTGTGGATGTCCTGAACAGCCCTTTGGAAGGACCTGACCAGAAGAGCTTCATTCCTGTGGAAAGGGCAGAGAGCACCTTCC…	0.496471	850
ACOT4	FALSE	FALSE	FALSE	TRUE	TGCATTTGTCTGTTGTTGACATGAGAGATTCAAGATCAGATTCTAGTGTTCAGTAACCCTATGTGAATCAGATGTCTCCTGGATAACATTAAAGCCATGTCTTTGTCATTAATGGTGTATTTTACGTAACTTTGTTGAATAAGCTTTGTCGTTAGTTTTACTAATGTAACTTGCTTGTTGTAGAAGATTAAGAGGCATATGACACATATAAGTGAAAAACATTCCCACCAGTTAACATTTGTGTTTCCTTCTAGATTTTTTTAGTTAATGTTTTGAGTCACAGGTGAGCTTTAAAGCTGGTGACTTTTTCCATCACTATGAAAGAATGGTCACTTAATGTTTGCTGTTCAACCATCAGTAGCAGGGTAGAATTTTCTTTGGCCAGAAACATACAGAGGG…	0.42399	842
ACOT6	FALSE	FALSE	FALSE	TRUE	CATTGTAGCCACAGACCAGATACCATTAATAAAAATCCTATTCATACAA	0.326531	49
ACOT7	FALSE	FALSE	FALSE	TRUE	CTGGGGCCTGACCCATGGCCTGCCCTCCTCCCGGGGTGCGTCTTGTGACTGCGGGCGCTTTGCATGGGACTCTGTACCTTACAGCTCACGTAATGCCTGCTGGCGCTGACCACACAGCTCCTTCCTCCTCTCCCAGCACTGGCACGAAGTGCTCCCTGCTGCGTCATCACCATCTCGGGACGCATGACCTTCACGAGCAATAAGTCCATGGAGATCGAGGTGTTGGTGGACGCCGACCCTGTTGTGGACAGCTCTCAGAAGCGCTACCGGGCCGCCAGTGCCTTCTTCACCTACGTGTCGCTGAGCCAGGAAGGCAGGTCGCTGCCTGTGCCCCAGCTGGTGCCCGAGACCGAGGACGAGAAGAAGCGCTTTGAGGAAGGCAAAGGGCGGTACCTGCAG…	0.583007	765
ACOT8	FALSE	FALSE	FALSE	TRUE	GGCCGGGACACCTGCTCTGCTCTAAATTTCTAGAATGTGCTGGAAATGTGATTCACCTTCTCCCAGGGACCCAGTTCTAGTCCCAAAACCAGTTCAGATTCTTTGTATTACAATAGGCAAATCATATCTTCCATCTGAACCTCAGTTTCCTCATCTAAACAAAGAGGGTTACATTACAGCAGTGGTATCCAAACCCGCAGTCCATCAGACTGCCATTTGGGGATGCCTTTTCAAAATAGATTCTGATTCCACCCTCAAGATTCTCACTCAGTAGGTCTTGGATAAGGTCCAGGAAACTGTATTTTTAAGTTCTCTAAGTGATTCTGATTAACCTGATTGGGATCGGGGCATTCAGTGGTCCCTAAGGGCCTGCTTGGACCTTCCTTGCAGGGGAGAGAA…	0.43436	617
ACOT9	TRUE	FALSE	FALSE	TRUE	GAACACCACATTTGTTGAAAACTAGCACTCTACCCACAGTGACGTGGTATCTGATGAAGACCTGATCGAGTGTATTGATTTTAGTATTGCTTCGTGTCCTCCACACAGGAGGAGGATGTATTCAGCCTTTAGGATGATCAGAAAAGCAGAAAGAGAGAGTGGCCGGATGGGGCTGAGGGGAGAAAGAATTATTAAACAATAAATACTTTCAAGACAATTTTAATTGTGAACCTACCATGTTGCCTCCCATCTTCTGAAAAAACAAAAAAATTGAGAGGCTGGGCGTGGTGGCTCATGCCTATAATCCCAGCACTTTGGGAGGCTGAGGCGGGCGGATCATGAAGTCAGGAGATCAAGACCATCCTGGCCAACATGGTGAAACCCTGTCTCTACTAAAAA…	0.466179	1641
ACOX1	TRUE	FALSE	FALSE	TRUE	AGTGTCACAAGGACAAGTTTAATCTGCTTCAGAAAGCGCCTGTGTGCAACTCAAATTTTGTGGAATCTTTTTCGAATTCAAATAGCTATAGAGCAAATGATAAATTGACCCCTTTTTATAAATGGAGGGAAAAAATGAACAGATTTCAGAGATTAAATGAAAAAAAGCAGATGTTTTAAGTGCAATTAACACTGAAAGAGACCTGTTAAACCATTCAGAAAAAGCTTAAGAAATGCGATATGACTTCCTTTTGTAATGCTGCTGATCCCAGTAGACTATGACTTTTGATAATTAGCAGAATTTAACTACTGAGTAGTTGATTATTTTCACATTTTAATTGCTAATCACTGGCTATATAAGTGTTTTTAAGCAAAGGTATTTTTGAAGTGGTGTAGAACC…	0.414806	5241
ACOX2	FALSE	TRUE	FALSE	TRUE	ACCATGTGCGGGTCCCCAGGGAGAACATGCTGAGTCGCTTTGCACAGTGACCCAGAGGCAAAGGTCCTGGACTACCAGACACAACAGCAGAAACTCTTTCCTCAGCTGGCCATCAGTTATGCCTTCCATTTCCTGGCAGTCAGCCTCTTGGAGTTCTTCCAGCACTCCTACACTGCCATTCTGAACCAAGACTTCAGCTTCCTGCCTGAGCTCCACGCACTGAGCACGGGCATGAAGGCCATGATGTCAGAATTCTGCACCCAGGGAGCTGAGATGTGCCGCAGGGCCTGTGGCGGACATGGCTACTCAAAGCTGAGTGGCCTGCCATCACTGGTCACCAAATTGTCGGCCTCCTGTACCTACGAGGGTGAGAACACAGTGCTCTACCTGCAGGTGGCC…	0.576147	545
ACOX3	FALSE	FALSE	FALSE	TRUE	TGGGACTGGCACACATTCAGCCAAGTCTAATGAAACGAAGGGAACTAATCAGACGTGGACCTCAACTTCTGATTCCAGAACACGCCGGAGATTGCTGCTGCTTTCTGAGCCCGCACCTGTGCGCCTAAACTGCTGATTGGCCTCAACTGCCCAGGCGGACGGGAGGGAGGCACCCGGCCGGCTGGACTAATCTGGGATCGCGGTGATTTGCAGCGTGGAAAAGAAATGCAGATGATCATGTCTACCTGATGCGCCGTGGGTTTTTTGATAATTAGAATTTCGCACATTCAGTTTTCAGGGTTCAGCTCCTTTCTCTAAAGTAAACAGCCCATTGTCAGGGATCTTCTGGTCAGACAACCTGTGATTCATCTAGATTTTTTACCGAGCTCCACTTCATTG…	0.452135	679
ACOXL	FALSE	FALSE	FALSE	TRUE	GCCCCTCTTGTGGACCAGGCTAATTTCCTGAAAACTGGTTTTTGCTAACGTTTCTTACGCTTGCTCGTGAAATCAGCCACTTAACTGTTCTGGGTTTTCCCGTGGCAGATCCCTATAGGCTTCTCACTGCACTATCCCAAACTTTTTATCTGAGAATGTTGTGTGGCAAGATGTCTGCAGAGTGCCGCTTAGGAGATGCTGGCCTGGCGTCCACGGGTCTGCTGTGTATGTCTCTCCAGGCAGATGGCCTGTCTCTGCCTGGCAAGGACGATCTGGGGTGGAAAAACTCTGATCTGAAAGTGAAATCATTGACTCCGTTACCATGTTCTGAATTCCCAGATCTCCCTGATATGGAAAGTGAAAATTGGCTTCTATTACACAATGCATCAAAATTCTTTT…	0.44557	1185
ACP1	FALSE	FALSE	FALSE	TRUE	GGCAGGTTCGTGCCCTGCTGCGGCCAGCCTGACTAGACCCCACCCTGAGGTCCTGCATTTCTCAGTCGGTGTGTAATCACGTTCCAGGGCCCAAAGCCCAGCTCTTTGTTCAGTTGACTTACTGTTTCTTACCTTAAAAAGTAATTGTAGATGGAAATCAGTTGTGTTTGGCAGGAGAATCAATAAAAATCTTTGATTCAGACAGCTTATGGGGTATTTTAAGCATTCTTAGACTAGTTGAACATCTCACTTTGCCCCAGTTACAAAAATAGTAGAACAAGCAACATAAAACAATGAAGGAAAACCTCACTTGAAGGCCCAGGTCAACATCTAAGCCTGTTGAGACTTAGATAATCGAGTCTACCTCTTCAGTAGGTTTGTGTGGATGGCCTGGAGGGC…	0.393258	979
ACP2	FALSE	FALSE	FALSE	TRUE	GACCCTGATCCATTTTTCATAGCAATTTCTGGACATGGTGGCCAACGAGACAGGGCTTACAGACCTGACACTGGAGACCGTCTGGAATGTCTATGACACACTCTTCTGTGAGCAAACGCACGGGCTGCGCCTGCCGCCCTGGGCCTCACCCCAAACCATGCAGCGTCTCAGCCGGCTAAAGGACTTCAGCTTCCGCTTCCTCTTCGGAATCTACCAGCAGGCGGAGAAGGCCCGGCTTCAGGGGGGAGTCCTGCTGGCTCAGATAAGGAAGAACCTGACCCTAATGGCGACCACCTCCCAGCTCCCCAAGCTGCTGGTTTACTCTGCGCACGACACTACCCTGGTTGCCCTGCAAATGGCACTGGATGTCTACAATGGTGAACAAGCCCCCTACGCCTC…	0.595287	976
ACP5	FALSE	FALSE	FALSE	TRUE	ACTCCCATGACTGCCCAGCTCTGAGGCCCGATCTCCACTGTTGGGTGGGTGGGCCCTGCCGGGACCCTGCTCACAGGCAGGCTTTTCCTCCAACCTGTGGCGCTGCAGCAGGGCAGGAAGGGGAAACACAGCTGATGAACTGTGGTGCCACATGACCCTTGTGGCACAGATGCCCACGTATGTGAAACACACATGGACATGTGTCCCAGCCACAGTGTTATGCTCTGTGGCTGGCTCACCTTTGCTGAGTTCCGGGGTGCAATGGGGGAGGGAGGGAGGGAAAGCTTCCTCCTAAATCAAGCATCTTTCTGTTACTGATGTTCAATAAAAGAATAGTTGCCAAGGCTGAA	0.557143	350
ACP6	FALSE	FALSE	FALSE	TRUE	CTGATTTATAAAAGCAGGATGTGTTGATTTTAAAATAAAGTGCCTTTATACAATGCCTCCTGCTTTGTGTGTTTGGGAAGAGGAGAGAGCAAGGGGTAATGTACTTTAATATAATGTAAGGATATTTCCTTTCTGTGGGTTTACTAAGATTTCTTCCTGAACGGAAAAGGGGTATAATATTGAGACCAAAAGGATATTTCTCTATTTTGTGAGTTGGTTTCTAAGGTTAGAAGCATCTTTGTGTGACACGGGCTGGGGACATCATGACCCTGTAGAATTGTGTCGGTTTTGGACTTTAGTTCTTTTCTCCTATATTAATTTCACATGTATTGAGCTACCTACTAAGTAGTGATCATTATAAAGGTGAAAACACTCTGCCCTCAAGTTGTTGCAGTCCAG…	0.422513	5188
ACPP	FALSE	FALSE	FALSE	TRUE	TGTGCACAGAGATCTCTGTAGAAGGAGTAGCTGCCCTTTCTCAGGGCAGATGATGCTTTGAGAACATACTTTGGCCATTACCCCCAGCTTTGAGGAAAATGGGCTTTGGATGATTATTTTATGTTTTAGGGACCCCCAACCTCAGGCAATTCCTACCTCTTCACCTGACCCTGCCCCCACTTGCCATAAAACTTAGCTAAGTTTTGTTTTGTTTTTCAGCGTTAATGTAAAGGGGCAGCAGTGCCAAAATATAATCAGAGATAAAGCTTAGGTCAAAGTTCATAGAGTTCCCATGAACTATATGACTGGCCACACAGGATCTTTTGTATTTAAGGATTCTGAGATTTTGCTTGAGCAGGATTAGATAAGGCTGTTCTTTAAATGTCTGAAATGGAACAG…	0.407684	1874
ACR	FALSE	FALSE	FALSE	TRUE	TCTGACCTGGTTCTCAACAGACCCAGTGAGCCCTTCACTCCTGAGAAAAAGGAAAGATGAAATAAATAAATAAACATATATATATAGATATACACACACACATATCTGTATGTATACATGCATATAC	0.338583	127
ACRBP	FALSE	FALSE	FALSE	TRUE	CACTCTCAAGGAGATAGAAGCTTCAGCTGAAGTCTCACCCACCACGATGACCTCCCCCATCTCACCCCACTTCACAGTGACAGAACGCCAGACCTTCCAGCCCTGGCCTGAGAGGCTCAGCAACAACGTGGAAGAGCTCCTACAATCCTCCTTGTCCCTGGGAGGCCAGGAGCAAGCGCCAGAGCACAAGCAGGAGCAAGGAGTGGAGCACAGGCAGGAGCCGACACAAGAACACAAGCAGGAAGAGGGGCAGAAACAGGAAGAGCAAGAAGAGGAACAGGAAGAGGAGGGAAAGCAGGAAGAAGGACAGGGGACTAAGGAGGGACGGGAGGCTGTGTCTCAGCTGCAGACAGACTCAGAGCCCAAGTTTCACTCTGAATCTCTATCTTCTAACCCTTC…	0.553047	443
ACRV1	FALSE	FALSE	FALSE	TRUE	AAGCCTGGGCCCTTGCTTGTTTTGACTCAGGCAGTAAAAAGCCTCCATCACTCTATTTGGCTCATTTTATATTTAGTTCCTTCCCCAGTCAACAACTGACCACATCTGCCTCTGCCTGAGCATTAGGATGCTCAAACATCCTATCTTTCTTCTTCTATTCATGCTTTTATCCATTCTTCTCTGTCCTGTCTTCCCTGCTCCAACTCTTTCTCTCAATATTCCTGATTTTTTTTTCAATAAATTTCACATGGTTAAAGCACACAGGCTCAAGACAGACCTTTTTTTCCCCCATTAATCTAGTTGCAGGGTCAACATGAGCTTCCTTCCACACCGACACTAAACTGGGTGCATTGTTTAAGCATTCCATATTTATGAAAGTAAAGGAGTCTCCAAGGGCAG…	0.380952	1071
ACSBG1	FALSE	FALSE	FALSE	TRUE	TCAGGGCCTATGCCTGCAGTTTCTATAGAATAGAGGGCAGGCGTTCCGAGCCTCTTCCTGAGCCCCAGGTCTCTTCAGTCTGGGCACAGGCATTTCTGCCAAGTCTGTTAGATCTCCAGGTCAGGGCACAGCACTGGCTCTACATTTACCAGGTCTTACGCCAACAATAGCTGACAATTCCAAGAAGCTTCACGTGTGGGTAGTTTTAATTCAGTTTAAGTATTGCTTTTTGTTCAGGTGACAAATGAGATCAGCTCTCCTTCCAGAACGAAAGGGCTGATAATTTTTGGCCTTAGTTCCAGGTAGATTAAAAAGCTGCTAGCTCACATACAGGACAGCCAGCAGTAGGCTGTGGAGCGGGTAGGAGAGAGATGGCTGATACTGCTCACGTGCGCTGCA…	0.408702	3976
ACSF2	FALSE	FALSE	FALSE	TRUE	ACCCAGCCTACCAGGCTATGGAACTGGAGTATGTCCTCAAGAAGGTGGGCTGCAAGGCCCTTGTGTTCCCCAAGCAATTCAAGACCCAGCAATACTACAACGTCCTGAAGCAGATCTGTCCAGAAGTGGAGAATGCCCAGCCAGGGGCCTTGAAGAGTCAGAGGCTCCCAGATCTGACCACAGTCATCTCGGTGGATGCCCCTTTGCCGGGGACCCTGCTCCTGGATGAAGTGGTGGCGGCTGGCAGCACACGGCAGCATCTGGACCAGCTCCAATACAACCAGCAGTTCCTGTCCTGCCATGACCCCATCAACATCCAGTTCACCTCGGGGACAACAGGCAGCCCCAAGGGGGCCACCCTCTCCCACTACAACATTGTCAACAACTCCAACATTTTAG…	0.546906	1503
ACSF3	FALSE	FALSE	FALSE	TRUE	CCCGGCAGACTGGGACTGCGGGTCTGGTGGGGAGCAGCAGACGTCCCCTTCACACCGAGAACCACGGGGGCCCGTCCAAGACCTGGCCTCCCTTAAACCTGAACCCCCCAAATCAGGTCACGTAGAATCAAGAACTGTTTGGGATGAAATCACCATGTGGGGTCCCCAGCCTCGGGCCAGTTGTTGCAGCTCAAGGAGACCGTCCCTGGTGTCACCTCTGCCTGGTCACCGCCGACCTCATCTGTGCAGCGCGGTGCAGCCAGCCCCTGGCCCCACGTGCTGAGGCACCTCCCGCCCCACAGTGCCCTGCAGTTGCCAGGCTCTCCAGGGCAGGTCCCAGAGGTTTCCCACAAAAAACAAAGACTCCACTGGAGGAAACAAGCCCCTGTCCCACGCCGT…	0.594265	1639
ACSL1	TRUE	FALSE	FALSE	TRUE	ATGTTCCCTGTGGCCCTGGGGGCTCCATGGTCAAATATGTGAGTGTCACATCCTGTATTTTATGATAATGGCCCTTGTTTAGGCTCTCGGAAACCAGACCAACCCTATGAATGGCTTTCATATAAACAGGTTGCAGAATTGTCGGAGTGCATAGGCTCAGCACTGATCCAGAAGGGCTTCAAGACTGCCCCAGATCAGTTCATTGGCATCTTTGCTCAAAATAGACCTGAGTGGGTGATTATTGAACAAGGATGCTTTGCTTATTCGATGGTGATCGTTCCACTTTATGATACCCTTGGAAATGAAGCCATCACGTACATAGTCAACAAAGCTGAACTCTCTCTGGTTTTTGTTGACAAGCCAGAGAAGGCCAAACTCTTATTAGAGGGTGTAGAAAAT…	0.475639	2073
ACSL3	FALSE	FALSE	FALSE	TRUE	TTATTCTCTTCTGGCATCAGTTTGCTACAGTGAGCTCAGATCAAATAGGAAAATACTTGAAATGCATGTCTCAAGCTGCAAGGCAAACTCCATTCCTCATATTAAACTATTACTTCTCATGACGTCACCATTTTTAACTGACAGGATTAGTAAAACATTAAGACAGCAAACTTGTGTCTGTCTCTTCTTTCATTTTCCCCGCCACCAACTTACTTTACCACCTATGACTGTACTTGTCAGTATGAGAATTTTTCTGAATCATATTGGGGAAGCAGTGATTTTAAAACCTCAAGTTTTTAAACATGATTTATATGTTCTGTATAATGTTCAGTTTGTAACTTTTTAAAAGTTTGGATGTATAGAGGGATAAATAGGAAATATAAGAATTGGTTATTTGGG…	0.318593	2985
ACSL4	FALSE	FALSE	FALSE	TRUE	AATGTTGTTGTCTTATTGACAGTTGTGCAGGAGGTAGCCTGGTGGTTTTCAACCTCTAGAATTTTAAGCCTTTGTTGAACTGTTAGAATGTAAGGTATATCATTCTAAAGATAGAGTAAAAAGAAAACAAAACCAAAAGTTATTAAAATTGTTGTCCGGTTTACTTTAACTTAGTTTTGCATAGTTCTAGTGCAGCTGAAATTGAAAAGTTATTTCCCTTTAGCTGTGTTATTATAGAGCAGAAATTCTGTTTTTAAAAATTAGCCTAAGATATACTTGTTTTTGTAAAGAAAAATATTTAATGTTGAACAAAATAAATTGGAGTTGGAGTAGAATGTAGTTTGAGGAAATTTGCAGCTTCCAATGCCTCTTGTCTTCCTATTTCAGAAGTTTAAATAT…	0.307578	2692
ACSL5	FALSE	FALSE	FALSE	TRUE	GATAAGGTACTTAAGTACCTGCCGGCCCACTGTGCACTGCTTGTGAGAAAATGGATTAAAAACTATTCTTACATTTGTTTTGCCTTTCCTCCTATTTTTTTTTAACCTGTTAAACTCTAAAGCCATAGCTTTTGTTTTATATTGAGACATATAATGTGTAAACTTAGTTCCCAAATAAATCAATCCTGTCTTTCCCATCTTCGATGTTGCTAATATTAAGGCTTCAGGGCTACTTTTATCAACATGCCTGTCTTCAAGATCCCAGTTTATGTTCTGTGTCCTTCCTCATGATTTCCAACCTTAATACTATTAGTAACCACAAGTTCAAGGGTCAAAGGGACCCTCTGTGCCTTCTTCTTTGTTTTGTGATAAACATAACTTGCCAACAGTCTCTATGCT…	0.373777	1022
ACSL6	FALSE	FALSE	FALSE	TRUE	AGTTCAAGGAAAGTTCTTCTCAGTGTAATGAACTGTCTAGCAATATTATAGTTATTCTTGAAAGTAATGAGTCAAAATGACACAGCTGAAAATGAATAAGCATCTGATTTTATGACTGAGCCTTTTCCTGTCCCAAGAGGTCTTTAACAATATTTTCTCTATCATCAATGAGTATATTTTATTTTTATTATAAAAATGATATTGTGGTGGACTGCTAAAAATATCACAAATGGCAATGTAAAAATCAAGACATTTTCTCAAGAACTGTGTACCACTAAAAGTAATATATTGTCAATGTTCACAGAACTATTAAACATAAAGGAAAAACATAAGTGATATATTCTACTTAATTATTTGTGAATCAGTAACCAGATGCAGCAAATATCTAGGCAATGTGGA…	0.339592	4261
ACSM1	FALSE	FALSE	FALSE	TRUE	AAGAATGCCATTCACTCCCAAGTGGTGAGAGACAAGCAGCCAGTGGTAGGAAGATCAGCATCCCCAGAACACACCTGTGTTAAGTCAAAGACCTTGGACCCAATGGTCATCTTCTTCACCAGTGGGACCACAGGCTTCCCCAAGATGGCAAAACACTCCCATGGGTTGGCCTTACAACCCTCCTTCCCAGGAAGTTAGTAGGAAATTACGGAGCCTGAAGACATCTGATGTCTCCTGGTGCCTGTCGGACTCAGGATGGATTGTGGCTACCATTTGGACCCTGGTAGAACCATGGACAGCGGGTTGTACAGTCTTTATCCACCATCTGCCACAGTTTGACACCAAGGTCATCATACAGACATTGTTGAAATACCCCATTAACCACTTTTGGGGGGTATC…	0.507345	885
ACSM2A	FALSE	FALSE	FALSE	TRUE	GACATCTAAGAGACATTCATTTGGATTCCCCTCTTCTTTCTCTTTCTTTTCCCTTTGGGCCCTTGGCCTTCCTATGATTATATGAGATTCTTTATGGAAGAACATGAATATAAGTTTTGTCTTGCCTTGGTTATTAGCACAAAACTTTACCATGTTAGATGTTGAAAGAAGAAAGGGAAGGAATGAGAGAGAGTGAAAAGGAGAGGGTAACAGAAAAAAAGGAAAGAAAAGTAAGTCAGGGAAATATTAAAACTGCAAGGGAAAGCAATTGAAAAAGAAATAAAGTAGGGAAAGAAGGAGAGAGGAAGCAAGGGAAGGAGGAAGAAAGGAAAGAGGAGATGAAAGGGGGAGAAAAGATAGAAGAAAAATAATTGAAGGGAGAATCAGAAAAATAAAGAG…	0.375126	989
ACSM2B	FALSE	FALSE	FALSE	TRUE	GGCGTCTAGGAGACATTCATTTGGATTCCCCTCTTCTTTCTCTTTCTTTTCCCTTTGGGCCCTTGGCCTTACTATGATGATATGAGATTCTTTATGAAAGAACATGAATGTAAGTTTTGTCTTGCCCTGGTTATTAGCACAAAACATTACTATGTTAGATATTGAAATAAGAAAGGGAAGGAATGAGAGAGAGTGAAAAGGAGAGGGTAACAGAAAAAGAGGAAAGAAAAGTAAGTCAGGGAAATGTTAAAAACTGCAAGAGAAAGCAATTGAAAAAGAAATAAAGTAGGGAGGGAAGGCGAGAGGAAGCAAGGGAAGGAGGAAGAAAGGAAAGAGGAGATGAAAGGGGGAGAAAAGATAGAAGAAAAATAATTGAAGGGAGAATCAGAAAAATAAAGA…	0.375969	1032
ACSM3	FALSE	FALSE	FALSE	TRUE	AGTTGTTTCATTAATTACCATATCTATAAAACAAACATAGTATCTGTCAATCTCTAGAAACCACAAGATGATGGAGAGGTCATAAAAACTGTGGTAGTATGCTTAGAAACTGTTGATTTAAAATATCTTGTGGTTATGATATCAGAGGCTAAATTTTGAAATAAAATATTTGGCAAATTCCTCCACATTAGTGTCAATGTTCCTATCATTTCTTAATATAAAAATAATACCATCAATTGCTGATTAATTTTTAAATGTATAGTATAGAAGCAGTTTCTGAACCAGATCTCTGCTACATAGGTTTTCAAACTTTAGTTGACTAATTCTTCTGATATGTTGATATACAAATCAGAACCAATGTTCAAGCCTGAAATAAAACTAAAGAACTTATAAAAGTTT…	0.264368	609
ACSM4	FALSE	FALSE	FALSE	TRUE	TTTGATAACAAAGCTGAAGGGTTAAGCAGTAATATGGTTGCTTTCTTTTAGTATTTGTTCCGATAATTCAGCGACTACTCTCTTAAAATGTTTAAGATCTTTCCTGCTTGAAAACTCAACTGTTGATTTTTTGGTTTTTACTTAGCTAAAAAGTTTAAAAGTAAATAAAAGCCTCAAAAACGTATGGATGAAAATTGTTATAATGACCAAACTGACAAAGGTAATGATGATGATTTGTAGTGTTTAAAATAGCAGGAATAAAATGATTGCTTAGAACAAGAAAGTGCACATTGAATCTGTATTTCATTTACCTTGTGCCTGATTGATTCAAAATAAACATATATCCTAAGA	0.296296	351
ACSM5	FALSE	FALSE	FALSE	TRUE	GGTGCACCCCAGGAAGGCCCCGTAGACCTCCGAAGACTCCACAAGAAACTAATGGATCACTGGTCAGTCCCCATGGGGAGCATCATCTCTTCGACCCTAAAGATGTCAAAGGTGTGCAGCTTCCAAACGGCATCCCCAGGATCACTGGGCAATGCTGGAAAGAGCAAAAGAATATCATTGGCCCTGATCACATAGATGCTGCGCCGCCTAGCAAATGCTTGGTGGTTCGACTTCTCCCTCTGTCTGGGGGCAGGCTCAGCATCTGCCCACTGGTCTCACTAAGAGCTTTCAGATTTCCCTCCATAGGACAGGTTACCATAGACTTGGGGCACTTGTGGGTACTCATTTTCTGCCAGTGGGAATGTAAAGGCTTCATCCTTTGTATGTAACCATTTGGCA…	0.394939	909
ACSS1	FALSE	FALSE	FALSE	TRUE	GCTGGCACCTTGTGGGGCTCTTGGGATGGGCGGGCACCCAAGCCCTGGCTTGTCCTTCCCAGAAGGTACCCCTGAGGTTGGCGTCTTCCTACGTCCCAGAAGCAGCCCCCACCCCACACATGACCCACACCGCCCTCACGTGAAGCTGGGCTGAGAGCCCTTTCTCCCATCCATTGGAGGTCCCAGGAGTGTCACCCATGGAGAGGCTATGCGACATGGCTAGGGCTGGTTCTGCCATCTGAGTTTGGTTTCCTGGAATGAAAAGGCATTGCCATCTCCATTCCTCTGCCCTCTTGAGCCAGCACAGGAAGGTGAGGCCCTGGGATAGCGCGCCTGCTCAGATAACACAGAGCTAGTTAGCTAGTAGCAACCGTGTTTTCTCCAGATCTGTCTAGATAC…	0.505875	1532
ACSS2	FALSE	FALSE	FALSE	TRUE	TGTGACTAAAGGGAAAATCTTCATTGAGTGGATGAAAGGAGCAACTACCAACATCTGCTACAATGTACTGGATCGAAATGTCCATGAGAAAAAGCTTGGAGATAAAGTTGCTTTTTACTGGGAGGGCAATGAGCCAGGGGAGACCACTCAGATCACATACCATCAGCTTCTGGTCCAAGTGTGTCAGTTCAGCAATGTTCTCCGAAAACAGGGCATTCAGAAGGGGGACCGAGTGGCCATCTACATGCCTATGATCCCAGAGCTTGTGGTGGCCATGCTGGCATGTGCCCGCATTGGGGCTTTGCACTCCATTGTGTTTGCAGGCTTCTCTTCAGAGTCTCTATGTGAACGGATCTTGGATTCCAGCTGCAGTCTTCTCATCACTACAGATGCCTTCTA…	0.522692	2600
ACSS3	FALSE	FALSE	FALSE	TRUE	TGAGTTTGTCTTATTCCTATTTTGAGTTGATTTAATTTCTTAATTGAAATTAAATTATTTGAGTTGTTTCTCAGAAATAAATATTTCAGTAGAAATTACTTGCAAAATGAAATGTGAATTGTAAAACTTGGCCTAAACAAATCTAATGAAAACATGTGAAAGACCTGTGCCTTTTTTTTGGTTTGACCCTGTTAGCATTGTTATTAGTTATCTATAACATGGCTTATTGAATGTCATCTACTGCTTTAGGAAAAACGTATCTAGTGTATTATTTTTAAAATTGTACCTCCCAAGAAGAACACTTTAATTGAAAGCAACACTAATATAGAGCCACTTCCTGAAACCAAGAATCTGTAGTTTTGATCCAAAATCTAAAACTTAAAGTCAGAAAATAATTAA…	0.323253	6283
ACTA1	FALSE	FALSE	FALSE	TRUE	ACACACTCCACCTCCAGCACGCGACTTCTCAGGACGACGAATCTTCTCAATGGGGGGGCGGCTGAGCTCCAGCCACCCCGCAGTCACTTTCTTTGTAACAACTTCCGTTGCTGCCATCGTAAACTGACACAGTGTTTATAACGTGTACATACATTAACTTATTACCTCATTTTGTTATTTTTCGAAACAAAGCCCTGTGGAAGAAAATGGAAAACTTGAAGAAGCATTAAAGTCATTCTGTTAAGCTGCGTAAA	0.440945	254
ACTA2	FALSE	FALSE	FALSE	TRUE	AACACTTTCCTGCTCCTCTCTGTCTCTAGCACACAACTGTGAATGTCCTGTGGAATTATGCCTTCAGTTCTTTTCCAAATCATTCCTAGCCAAAGCTCTGACTCGTTACCTATGTGTTTTTTAATAAATCTGAAATAGGCTACTGGTAA	0.395973	149
ACTB	TRUE	FALSE	TRUE	FALSE	CCTGAGTCTCCTTTGGAACTCTGCAGATCATGTTTGAGACCTTCAACACCCCAGCCATGTACGTTGCTATCCAGGCTGTGCTATCCCTGTACGCCTCTGGCCGTACCACTGGCATCGTGATGGACTCCGGTGACGGGGTCACCCACACTGTGCCCATCTACGAGGGGTATGCCCTCCCCCATGCCATCCTGCGTCTGGACCTGGCTGGCCGGGACCTGACTGACTACCTCATGAAGATCCTCACCGAGCGCGGCTACAGCTTCACCACCACGGCCGAGCGGGAAATCGTGCGTGACATTAAGGAGAAGCTGTGCTACGTCGCCCTGGACTTCGAGCAAGAGATGGCCACGGCTGCTTCCAGCTCCTCCCTGGAGAAGAGCTACGAGCTGCCTGACGGCC…	0.517715	1383
ACTBL2	FALSE	FALSE	FALSE	TRUE	ATGGGCTTCCATATTAGTGGGCTTACATTTTCCCTTTTCCTAGGTCACAGTGATGGTACTGCTTTTATCCGCTTTCAGTAGAATCGAGGTAAATACGTCACTCTTCCTAGTGTAAACCAGCAAACCCATCTCTCCATCCAAGTAACCTGGGCTCTTACCCAGATAACCACATCCGGTTCTCCATCAAGTGAAGGTGAATTCTAATACCATATTCCTTTTTCTTTGCCTATACTGTTCAAAGATAGGTAGGCCAGCTTAAATACATATAAGTGACAAGGAGTAAAATCACGAGAAATGTCATTTCAGAATGGATAACTATAATTATCAAGCTTTAAAACTTAGTTCTCGCTAAAATATTTAACAAGAACAGGCTGTATAAACTTGTTTAAAAAAAAAAGG…	0.303652	1561
ACTC1	TRUE	FALSE	FALSE	TRUE	GATGCCTTCTCTCTCCATCTACCTTCCAGTCAGGATGACGGTATTATGCTTCTTGGAGTCTTCCAAACCACCTTCCCTCATCTTTCATCAATCATTGTACAGTTTGTTTACACACGTGCAATTTGTTTGTGCTTCTAATATTTATTGCTTTATAAATAAACCAGACCAGGACTTGCAACCTATAAAAGCCTCTCGTTTGTTTTTGGGGTAGGCGTGGGGTGGGGCAGGTGTTTGCTTTGACACCCTGAGCATTGTCAAAGTTCAGTACCACAAGGTTCATCCAGATGAATTAATATGACAGTTAGCTGGGAGTTATAATGCTAACTTTTGATTTCATATTTTGAGACAGAATCATGAATATATTTCATACCTGAAAAGCAGATTAAGGTTTAGTTCCAT…	0.38601	2316
ACTG1	TRUE	FALSE	FALSE	TRUE	ACGGACTCAGCAGATGCGTAGCATTTGCTGCATGGGTTAATTGAGAATAGAAATTTGCCCCTGGCAAATGCACACACCTCATGCTAGCCTCACGAAACTGGAATAAGCCTTCGAAAAGAAATTGTCCTTGAAGCTTGTATCTGATATCAGCACTGGATTGTAGAACTTGTTGCTGATTTTGACCTTGTATTGAAGTTAACTGTTCCCCTTGGTATTTGTTTAATACCCTGTACATATCTTTGAGTTCAACCTTTAGTACGTGTGGCTTGGTCACTTCGTGGCTAAGGTAAGAACGTGCTTGTGGAAGACAAGTCTGTGGCTTGGTGAGTCTGTGTGGCCAGCAGCCTCTGATCTGTGCAGGGTATTAACGTGTCAGGGCTGAGTGTTCTGGGATTTCTC…	0.435327	719
ACTG2	FALSE	FALSE	FALSE	TRUE	GTGATACAATGTGCCTTGCATCACTCAGTGCACAAAGGCAGGGGAGAGACTGTAGGAGAGTGAAGAGGAGGGAAGGTCAAATGGAAATAATGAACACATAGAAAATACTGGTTCCAGGTCTGAGTCCTACCTGGGGCCCTGTTGAGAAGGAGTATACCCTTTAAATGTCAATCAGAAATTTCCAGGGCTGACCATTCTCCTCTCCAGATCCATCCCATCCTGTGTAACATGGTGCCACACTCTCCCAGCATGGGAATGTCAATGAGAATTTTCCAGCCATTGGGAGTCTGCCAGGCTCATATGGCTTTTGTCTCCACTAGATCTGGCACCACTCCTTCTACAATGAGCTGCGTGTAGCACCTGAAGAGCACCCCACCCTGCTCACAGAGGCTCCCCTAA…	0.516204	1296
ACTL10	FALSE	FALSE	FALSE	TRUE	GTCAGGCTGGACTGGGGGGGGTGGCACTGCGTTGGGGGACAGCTCTCTATCTAAAGAGTCAAGTGTTTGGAGCTGGCAGGGTCCTCCTGGAGGTTGGAGCTGACTGGATGGGTCACCCCCATACCCTTTCTGGGCCAGGAGAAGGTATTTGGGACCCATGGGACCCTCATTTTGAACTGCAGTTTGAATCTCCCCAACCACTGCCAGTTCAGAGAATGCCAGTCCAGCTGCCTACCCACAGGGCCCTACTTTATGGCAATAAAGGTGATGCCCCACTTGTGTCCATGCCA	0.562069	290
ACTL6A	TRUE	FALSE	TRUE	FALSE	ACAGGATAACCTTCAGGGAAAAGGCAGTTTTGGTGCACCATTGTGTGTCTACTGTGTTAAAGGAATTTTAGTGCCAGATTTGCTAATGGTCGTTCTACTGGGCTGATTTTGGACAGTGGAGCCACTCATACCACTGCAATTCCAGTCCACGATGGCTATGTCCTTCAACAAGGCATTGTGAAATCCCCTCTTGCTGGAGACTTTATTACTATGCAGTGCAGAGAACTCTTCCAAGAAATGAATATTGAATTGGTTCCTCCATATATGATTGCATCAAAAGAAGCTGTTCGTGAAGGATCTCCAGCAAACTGGAAAAGAAAAGAGAAGTTGCCTCAGGTTACGAGGTCTTGGCACAATTATATGTGTAATTGTGTTATCCAGGATTTTCAAGCTTCGGTA…	0.415313	431
ACTL6B	FALSE	TRUE	FALSE	TRUE	TGGCACTCCTCCCCACACACCTGCTCCCAAGCTCAGATGGAAGTCCCTTAACCCCCATGCCACATTGCCCCCCTCCTCCTTTCCCTCTTGTCCTCATTAATGGTGATGTTTCTGGGTTGAAAGAAGTAAAAATGTTTTAAGAAAAAAAA	0.469799	149
ACTL7A	FALSE	TRUE	FALSE	TRUE	ACAGCGACGAGGATGGACACTGCACTGGCAGTGCCTACCCTCGACAGGGTGAGCGCACTCCTACACACAGGGGGTGGAGCCGGCGCTTATTCCTGTAGCATTAAACACCCCTCATATGCCCCTCCACAG	0.596899	129
ACTL7B	FALSE	FALSE	FALSE	TRUE	GCCTCGGCATTTCCACAGACAAGGCCTCCAGCACAGATGGCCACAGGCCTCTCTATACACATTTACAGAATTTCACATAAAGGTTTACTCTGAA	0.468085	94
ACTL8	FALSE	FALSE	FALSE	TRUE	CCCTACTGGCTCACTCCTGAGAATGGGCTCCTGTTAGATGGGCACGGGCGGATTAATTTTAGCAAAATGTTCTGGGTGGGGGTAGAATGAGGTGGGGTGGGGTGAGCTGGCTTTGGAATTCTAGGGGCATGAGGGTATTTTTTAGGTTCTAAGGTTTTATCTTGTTGCAAGAGTGGGACCTACCCAAGGGGGAAGACAAGATGTCATCCTTGGAAACCCTGCAGGGGACAGTTTTTCCAGGGTGGCCTATCATTGGGGTATGAGTGGCTGACTGCCATCTCCATGCCTGAGAGCCACTGATTTTTCATTGGCATTTCCCCTGGTTTGTCTCATTCTTCTTGGTTGAGTAGGTTTTAACTGGGGTAGCACTCCTGCTAGGAGTCCCAATTATTTTTGACT…	0.498162	544
ACTL9	FALSE	FALSE	FALSE	TRUE	CCAGGGCAGAGCTGGGGAGGGCGTGGGGGCAGTAAAGCCTCTGCTACAGCCGGC	0.703704	54
ACTN1	TRUE	FALSE	FALSE	TRUE	TCCACCCCGCCCGGCCGCCCTCGTCTTGTGCGCCGTGCCCTGCCTTGCACCTCCGCCGTCGCCCATCTCCTGCCTGGGTTCGGTTTCAGCTCCCAGCCTCCACCCGGGTGAGCTGGGGCCCACGTGGCATCGATCCTCCCTGCCCGCGAAGTGACAGTTTACAAAATTATTTTCTGCAAAAAAGAAAAAAAAGTTACGTTAAAAACCAAAAAACTACATATTTTATTATAGAAAAAGTATTTTTTCTCCACCAGACAAATGGAAAAAAAGAGGAAAGATTAACTATTTGCACCGAAATGTCTTGTTTTGTTGCGACATAGGAAAATAACCAAGCACAAAGTTATATTCCATCCTTTTTACTGATTTTTTTTTCTTCTATCTGTTCCATCTGCTGTATTC…	0.405028	716
ACTN2	FALSE	FALSE	FALSE	TRUE	TGCTGAGCTTCTGTAATCACTCATCCCATCAGAATGCAATAAAAGCGGAAGTCACAGTTTGTTTCCTGGAAACTTTGACAAGCTTTATTAAGTTGAGAGAGAGAGAGGGGAAAAAAAAAAGCCTTTCGTAGTTCAGTAATTGCCAGCAATATAACACGGCTAAAATGAAGTTTTTACAGTATATGACATAGTGCGCTTCATAAATAGGTTTATTTCTGAGTTTTTAGCAAAATGTAATGAAATATCAGGTTGATTTCTTTGATTAAACAGAACAAATTACTTGAGTAATAGGAAATTAGGAGGATCTAGGGACAGAAGGAAAGTGAAAAATGTGAAAATACAAAATACCCAAGATTTAAGACCGGGGGGAAAAAACCACAAATTGGTAAATAAAGGTTT…	0.360835	2012
ACTN4	TRUE	FALSE	FALSE	TRUE	GGCCCCAGAGACCTGACCCAACACCCCCGACGGCCTCCAGGAGGGGCCTGGGCAGCCCCACAGTCCCATTCCTCCACTCTGTATCTATGCAAAGCACTCTCTGCAGTCCTCCGGGGTGGGTGGGTGGGCAGGGAGGGGCTGGGGCAGGCTCTCTCCTCTCTCTCTTTGTGGGTTGGCCAGGAGGTTCCCCCGACCAGGTTGGGGAGACTTGGGGCCAGCGCTTCTGGTCTGGTAAATATGTATGATGTGTTGTGCTTTTTTAACCAAGGAGGGGCCAGTGGATTCCCACAGCACAACCGGTCCCTTCCATGCCCTGGGATGCCTCACCACACCCAGGTCTCTTCCTTTGCTCTGAGGTCCCTTCAAGGCCTCCCCAATCCAGGCCAAAGCCCCATGTGC…	0.559275	2151
ACTR10	FALSE	FALSE	TRUE	FALSE	AAGTTTGATTAAAAATCAACCTTGCTTCATATCAAATATTTAACCAATTATAAGCAAATTGTACAAAGTATGTAGGATGTTTTGTTATAGAGGACTATAGTGGAAGTGAAAGCATTCTGTGTTTACTCTTTGCATTAATATATAATTCTTTTGACTTTGTTTCTCTTGTGTAGTGGTAAAATGGTAGCTGGTGCTTATTGAGATTTGCTGTATTTATATCAATAAAGTATAGTAAAGCAGTTTGATTTTGGAAGTTTGTTATGTGGCTTTTTTTTTTTTTTTTTTTTTGAGACGGAGTCTCGCTCTGTCACTTAGGCTGGAGTGCAGTGGCACAATCTCTACTCATTGCAAGCTCCGCCTCCCGGGTTTACGCCATTCTGTCTCAGCCTCCTGAGTAGC…	0.347465	1085
ACTR1A	TRUE	FALSE	TRUE	FALSE	GAAGATGTGGGTCTCCAAAAAGGAATATGAGGAAGACGGTGCCCGATCCATCCACAGAAAAACCTTCTAATGTCGGGACATCATCTTCACCTCTCTCTGAAGTTAACTCCACTTTAAAACTCGCTTTCTTGAGTCGGAGTGTTTGCGAGGAACTGCCTGTGTGTGAGTGCGTGTGTGGATATGAGTGTGTGTGCACATGCGAGTGCCGTGTGGCCCTGGGACCCTGGGCCCAGAAAGGACGATGAACTACCTGCAGTGGTGATGGCCTGAGGCCTGGGGTTGACCACTAACTGGCTCCTGACAGGGAAGAGCGCTGGCAGAGGCTGTGCTCCCTCCTCAGGTGGCCTCTGGCTGGCTGTGGGGGACTCCGTTTACTACCACAGGGAGACAGAGGGAGGT…	0.560142	1696
ACTR1B	FALSE	FALSE	FALSE	TRUE	TGCCCAAGGAGGGCGGGGCATGTTGGGAGAGGGGGAGGGAGGGGAGACAGAGCCTTTAACCCTTTTTGGTCTTGGCTCGTATACTAGGCTTAGGGTCCCCTGCATGCCCTGAACCCCTGGGTGGGTGGCACAGCAGTGCCCCCCTGCAGCCTTCCCCTCTACACAGGACATGCACACACAAGTAACATTGAGCTGCATGGACAGGAGCCTTGAGCTGGCGTGTGGGAATTGAGCGCCATGTCAGGCTGTTGTGGGTATCCCCCTGGCAGGGCCAGCTAGGCCTGTGGTTCCCTGCTCCGACTCTCAGGGCTGCCTCCCTGAGCTCCAGGGCCAGAATGCCTGGATGCCTGGGTAGCCAGTTTGGGGAGTGGGCTGCAAGGGGCAGCCAGCAGCTCCCAC…	0.56648	895
ACTR2	TRUE	FALSE	TRUE	FALSE	ACTCCAAAGCTTGTTCCCGTCATACCCGTAATGCTTTCTTTTTTCCTTTATTGCCAATCTTTGAACTCATTCAACTCCAGGACATGGAAGAGGCCTCTCTCTGCCCTTTGACTGGAAAGGTCAAGTTTTATTCTGGTGTCTTGGGGAAGCTTTGTTAAATTTTTGTTAATGTGGGTAAATCTGAGTTTAATTCAACTGCTTCCCTACATAGACTAGAGGGCTAAGGATTCTGTCTGCTGCTTTGTTTCTTCTAAGTAGGCATTTAGATCATTCCTATAGGCTTCCTATTTTCACTTTACTGCTCTAATGCTGCTAGTCGTAGTCTTTAGCACACTAGGTGGTATGCCTTTATTAGCATAAAACAAAAAAAACTTTAACAGGAGCTTTTACATATTACTG…	0.341008	2519
ACTR3	FALSE	FALSE	TRUE	FALSE	AATTGGCTTCATAGTTATTGGGGTTAGGGAGGTGGGGAAGAGATAATCTTTCTGATTACCTGTTTTGTCTGGATGGCTGGTTTTGAGGTTTTAAACCTGACTTGAAATAGTAACACCAAACATGATTATACAGGAATATTTTAATAAGTGTATCACCATGCAGATGTAGAAGAGAGCGAAAGTGATTGTGTTTTTCTTTAGATTGAATATTTGAATCTTATGTGTAACAAAAAGAAGTGGGTTTTAGTTCTTTCTGTGCCCTGATATTTTGTATATTAATGAATTATCCAAGATTCGATGGGATTTATCAGTGTGTAGATAGCTCTATAATGCTTGAATTGTACACTTCTAAGTGTGCAGTGCAAGAGCTTGTTTATATTTCATACTTTTTATACTTTG…	0.321922	5141
ACTR3B	FALSE	FALSE	FALSE	TRUE	TGTCTGCCTGAACGCGTCGTTCGATGGTGTCACGTTGGGGAACAAGTGTCCTTCAGAACCCAGAGAAGGCCGCCGTTCTGTAAATAGCGACGTCGGTGTTGCTGCCCAGCAGCGTGCTTGCATTGCCGGTGCATGAGGCGCGGCGCGGGCCCTTCAGTAAAAGCCATTTATCCGTGTGCCGACCGCTGTCTGCCAGCCTCCTCCTTCTCCCGCCCTCCTCACCCTCGCTCTCCCTCCTCCTCCTCCTCCGAGCTGCTAGCTGACAAATACAATTCTGAAGGAATCCAAATGTGACTTTGAAAATTGTTAGAGAAAACAACATTAGAAAATGGCGCAAAATCGTTAGGTCCCAGGAGAGAATGTGGGGGCGCAAACCCTTTTCCTCCCAGCCTATTTTTG…	0.415758	825
ACTR3C	FALSE	FALSE	FALSE	TRUE	GATGATATATTGAGCCCATGCGTAGCCTTTTATTTGAGGTATTCTCATGATTTTCATTTTTAATTCTAGGCTCTACTTTTGCTGAAATTTTCTATTTTTTTCATTTGTTTCAAGAGAACCCATAATTGCTTATTGAAGCATTTTTATGACAATTATTCTAAAATTCTTTGCAGGTAATCCCAGCACCTGAGTCATCTTTATGTTGGAGTCTCAATCGACTCTTCATTCATTTGTGATTTTTCTGGTTCTTGCTATGATAAGTGGTTTTTTATTGTATTCTGGACATTTTGATAAGATTGTGAATCCTATTTACTTTTTTTTTTTTTGAGACGGAGTCTAGCTCTATCTCCAGGCTGGAGTGCAGTGGTGCGATCTCAGCTCACTGCAACCTCTGCCTCC…	0.417357	5070
ACTR5	FALSE	FALSE	FALSE	TRUE	CAGAGGCCCTCCAGAGAGACTGCCCTGCACGCCATGCCTTGGGCCACGTTGGCAGTGTGACAGGACTGTGATTGTGCTAGATGTACCTGCCCAAGTCTGCTGGTCACATTTGGCAGCAAAATGGATTTCTCCTGGGGAGAACAAAGTTAAGGGACACTGAGACCTGCCCTTCAGAATTCGGTTCACTTGGGGGCTTCTGTGGTAGAGACTAACTGGCCTTCTGATGTCTTTGTTCAACTGTGGCCAGCTGTGGCATCAGCTTCCTGGAGCAGTAAATGAAGACAGAGTGGAGGACACAAATGTACAAAATGCACAAGACTGATTTCTTACCACATTTTAGTCTTTCTTGTTTTAAAAAAAATTCTTTAAAATTTATCTTGTCCGTGTAGATACTTTATT…	0.458807	704
ACTR6	FALSE	FALSE	TRUE	FALSE	AGTTGATTTTTTAGATACTAATATTATTATCACTGAACCATACTTTAACTTCACTTCAATTCAAGAATCAATGAATGAAATTCTATTTGAAGAATACCAGTTTCAAGCAGTATTAAGAGTAAATGCTGGGGCTCTCAGTGCACATAGGTATTTCCGAGATAATCCTTCCGAATTATGCTGTATCATTGTTGATAGTGGATATTCCTTTACACATATAGTTCCTTATTGTAGAAGTAAAAAGAAAAAAGAAGCAATTATTCGGATAAATGTGGGAGGAAAACTCTTAACCAATCATCTAAAGGAGATCATATCTTACAGGCAGCTACATGTTATGGATGAAACACATGTGATTAATCAAGTGAAAGAAGATGTATGCTATGTGTCTCAGGATTTTTATAG…	0.336332	1445
ACTR8	FALSE	FALSE	TRUE	FALSE	ATGGGGAGGAAATGTCACTGCCGAAGACCAAAAACAAGCTTCTTGGTATAAAAGACTCTTACAGAATATGTGTATTGTAATTTATTGATCTGGATGCTTAAGTGTCATGGACAGTAAATGAATTTGAACTTTATGTTGAGGACATGACATTGGTTTGAAAATATAAACTGCTTTTGAGCAGTTTAGTCAGGGCATTTGAGAATAAATAGGAACTTTCTCTTCAGTTGTAAACTCTCTTGCCCTCTCTCAGGGTCTCATAAACTCCCCAGTGATGTAAACGTTGCTATTGAAGGTTCTCATGTGGTGAAGCCCTTCATTTAAGTTGGCTTGAATCTCATCAGCAGGCAGCCTCATGCAACCATGAGGGATAGTATGTGACGAGGGAGAACTGTCCACTCA…	0.393224	1653
ACTRT1	FALSE	FALSE	FALSE	TRUE	AGATCCTTGAGCAGAGGAGACATCTTGAAGTGTCAGATTACAGGAGTACCAGTGGGAGATGGCATTTTCTTCTGGGCTTCAGCATGATGTTCAATAAAAGTTTTGCCATTTCAA	0.421053	114
ACTRT2	FALSE	TRUE	FALSE	TRUE	AGGCCGCTTCTCGTTGGGTACCGTGGGGGGTGAACCCTAGCCCCAGCTTTGGGAGGATGTTCAATAAAGGACCAATGCCGGAA	0.578313	83
ACTRT3	FALSE	FALSE	FALSE	TRUE	AATACAGATAAAATGGTTGGAAGAAAATGTTTTGAGTATATGTGACAGAAAACTTTGGATATTATATGTTTCTGGGAGAAGAGAAAATACTTCACCTATTGGGATGCCAATATTTCTGTTGTATTTCTATAATGGGTTTGGGGGATAATAATGGTGAAGCTCAAGAACAGATGTCTATTGAGTAGAACCAAGTTAAAATAATGTTTCCCATAGTGTTTCTTCTATAACTTGACGTTGGTGAGCTTATATTTCCCTTGGAAGAGAGCATTTGTGGTACAATATGCTATGTGCCAAATGAGTGATAAGATTTAAGCTTATTGAAGTTTAGGGAAAGAAGGTTGCTGTGGTGAGGAACGAGACTCCATAGCAGAGGTATGCCATCATGGAAGGGGTGGCATT…	0.363992	511
ACVR1	TRUE	FALSE	FALSE	TRUE	CATTTTCATAGTGTCAAGAAGGAAGATTTGACGTTGTTGTCATTGTCCAGCTGGGACCTAATGCTGGCCTGACTGGTTGTCAGAATGGAATCCATCTGTCTCCCTCCCCAAATGGCTGCTTTGACAAGGCAGACGTCGTACCCAGCCATGTGTTGGGGAGACATCAAAACCACCCTAACCTCGCTCGATGACTGTGAACTGGGCATTTCACGAACTGTTCACACTGCAGAGACTAATGTTGGACAGACACTGTTGCAAAGGTAGGGACTGGAGGAACACAGAGAAATCCTAAAAGAGATCTGGGCATTAAGTCAGTGGCTTTGCATAGCTTTCACAAGTCTCCTAGACACTCCCCACGGGAAACTCAAGGAGGTGGTGAATTTTTAATCAGCAATATTG…	0.370745	1087
ACVR1B	FALSE	FALSE	FALSE	TRUE	CTGCTCCCTCTCTCCACACGGAGCTCCTGGCAGCGAGAACTACGCACAGCTGCCGCGTTGAGCGTACGATGGAGGCCTACCTCTCGTTTCTGCCCAGCCCTCTGTGGCCAGGAGCCCTGGCCCGCAAGAGGGACAGAGCCCGGGAGAGACTCGCTCACTCCCATGTTGGGTTTGAGACAGACACCTTTTCTATTTACCTCCTAATGGCATGGAGACTCTGAGAGCGAATTGTGTGGAGAACTCAGTGCCACACCTCGAACTGGTTGTAGTGGGAAGTCCCGCGAAACCCGGTGCATCTGGCACGTGGCCAGGAGCCATGACAGGGGCGCTTGGGAGGGGCCGGAGGAACCGAGGTGTTGCCAGTGCTAAGCTGCCCTGAGGGTTTCCTTCGGGGACCAG…	0.514151	2968
ACVR1C	FALSE	FALSE	FALSE	TRUE	TGATGATAATTATGTTAAAAAGAAATCTCTCATAGCTTTCTTTTCCATTTTCCCCTTTATGTGAATGTTTTTGCCATTTTTTTTTTGTTCTACCTCAAAGATAAGACAGTACAGTATTTAAGTGCCCATAAGGCAGCATGAAAAGATAACTCTAAAGTTAAGCATGGGCAGGAGTTGACTTCATCCAATCTCTATGTTATGTTTAATTTTATTTTGAAAGCAACACCTCAACTCATCTTTTTATTTAATAAGGAAGAAATATATTACAAAAGTATAAAATAAGCTCTATAAAAATGTTATAGTCATTAAGTTTTTATTTTACTTGAACCAAGAGCACATGAATGAACAGGAAAAGATGTAAAAACATTTTTTTCTGAGATGAAAACATATTAATTAAAC…	0.318557	7151
ACVR2A	TRUE	FALSE	TRUE	FALSE	TGGTTGCGCCATCTGTGCACACTAAGAAATGGGACTCTGAACTGGAGCTGCTAAGCTAAAGAAACTGCTTACAGTTTATTTTCTGTGTAAAATGAGTAGGATGTCTCTTGGAAATGTTAAGAAAGAAGACCCTTTGTTGAAAAATGTTGCTCTGGGAGACTTACTGCATTGCCGACAGCACAGATGTGAAGGACATGAGACTAAGAGAAACCTTGCAAACTCTATAAAGAAACTTTTGAAAAAGTGTACATGAAGAATGTAGCCCTCTCCAAATCAAGGATCTTTTGGACCTGGCTAATGGAGTGTTTGAAAACTGACATCAGATTTCTTAATGTCTGTCAGAAGACACTAATTCCTTAAATGAACTACTGCTATTTTTTTTAAATCAAAAACTTTTCA…	0.336149	3552
ACVR2B	FALSE	FALSE	FALSE	TRUE	GCCCAGGACATGAGTGTCTGTCCAGACTCAGTGGATCTGAAGAAAAAAGGAAAAAAAGTTGTGTTTTGTTTTGGAAATCCCATAAAACCAACAAACACATAAAATGCAGCTGCTATTTTACCTTGACTTTTTATTATTATTATTATAATTATTATAATTATTATTATTAATATTATTTTTTGGATTGGATCAGTTTTTACCAGCATATTGCTCTACTGTATCACAAACAGCGGACACGTCAGCAGGCGTTGAGGTGCTGAGCTGTGGATGCAGAACCAGCGCCATGCTGAAGAGCCTCAGCCACCTCCTGTCCTTTGGGATTCGTTTTTCCCGCTTTCTCTTTGTTTGTCGTCTCAGAATCTGTGACACAAAGAAACCCATCTCCTGTCTTAGGAAACC…	0.419062	9810
ACVRL1	FALSE	FALSE	FALSE	TRUE	CCCAGGAGCACCTGATTCCTTTCTGCCTGCAGGGGGCTGGGGGGGTGGGGGGCAGTGGATGGTGCCCTATCTGGGTAGAGGTAGTGTGAGTGTGGTGTGTGCTGGGGATGGGCAGCTGCGCCTGCCTGCTCGGCCCCCAGCCCACCCAGCCAAAAATACAGCTGGGCTGAAACCTGATCCCCTGCTGTCTGGCCTGCTCAAAGCGGCAGGCTCCCTGACGCCTGGCTCTCTCCCCACCCCTATGGCCAGCATGGTGCACCCCCTACCACTCCCGGGACAGGATGCAAAAGAGGCTCCAGAGTCAGAGTGCCAAGCCAGGGAATCCCAGTCCCAGACTCAGAGCCCGGGCCTGCACTTTGCCCCCTGCCCTTGATCAACCCCACTGCCCCACCAGAGCTG…	0.551095	2466
ACY1	FALSE	FALSE	FALSE	TRUE	GGCCTTCAAGGATTCTGAGGGCTACATCTATGCCAGGGGTGCCCAGGACATGAAGTGCGTCAGCATCCAGTACCTGGAAGCTGTGAGGAGGCTGAAGGTGGAGGGCCACCGGTTCCCCAGAACCATCCACATGACCTTTGTGCCTGATGAGGAGGTTGGGGGTCACCAAGGCATGGAGCTGTTCGTGCAGCGGCCTGAGTTCCACGCCCTGAGGGCAGGCTTTGCCCTGGATGAGGGCATAGCCAATCCCACTGATGCCTTCACTGTCTTTTATAGTGAGCGGAGTCCCTGGTGTAAGTATGAGCTTGGAGGGAGGGCTCACTCTACAGGCGGGAGGCTAGGCCAGAAAGGGCACGGTCCTATGCAGGGTTGCACAGCAAAGTTGAGGCCTGAGAAGGC…	0.592328	1538
ACY3	FALSE	FALSE	FALSE	TRUE	CCCAAGACACACCTCCCCAACCTCAGTCTTCCCATCTGAACGATGGGTCCTGAGGCACAGCTCTGAGCACAGAGGTCCCTTCTGCCACCTACCATGCACCATGTTCCTTGCCAGGCCTCCCCAACCCCTGGCCTCAATTTCCCTTTCTATAAAATGGAAGATGTCCAGA	0.550296	169
ACYP1	FALSE	FALSE	FALSE	TRUE	CCTAGGTTGTGGGCATAGGAACAAGGGACGTGTTCTTGACAAATGTGAACTAGAAGCCGCTGGCTATTTGGTAGCTGCATGGCAAAGAGGTAGTTTGTAGAGCAATGAGTATGAAAATGCTGTGCAATCGGTAAAACATGGTGTAAATGGAAGATCACCCTGCTGTTATTATTAGTCAGTGGTGCCTGAGCATCTAGATACACATATTAATGAGCTTCTCTCTTCCAAGGGAAATAGAGGGCTTCCCCAGTGCTCGCCGTTGTGGCATCATCAAACCAAGTCAGGTTTCTTATAGAAAGGCTAACATTGATTGAAGAGCTGGCATTTAGATGACCTGATGTCATGTATATAACATATATAAATGCTTCCTCTGCAGCTGCTGCACTTTCTTCAGACCTC…	0.436451	417
ACYP2	FALSE	FALSE	FALSE	TRUE	ACTCACTGCAGCCTTGACCTTCTGGGCTCAAGTGATCTTCCCACGTCAACCTCCTGAGTGCACATGCTGGCTAATTTGTGTGTGTGTGTGTGTGTGTGTGTGTGTATATTTTGTTGTTGTTGTTGTTGTTGTTGTTGTTGTTGCTTTGTAGAGATAGTGTCTCACTATGTTGCTCAGGCTGGTATAGGACTCTTGGCTTCAAATGACTTTCCTGCCTCAGCCTCCCAAAGTGCTGGGATTACAAAAATAAACTTTATTTTTGAGAACAGTTTTATATTTACAGAAAAATTGTGAAGATAGTACAGAGACTTTCCATATACTCCCCACACAGTTTTCCTCCTATTAACATTTTACATTAATATGATACGTATGTTAACAATTAATGGACCAATATGGATA…	0.356077	1407
ADA	TRUE	FALSE	FALSE	TRUE	AGAGCGGCATTCACCGTACTGTCCACGCCGGGGAGGTGGGCTCGGCCGAAGTAGTAAAAGAGGCTGTGGACATACTCAAGACAGAGCGGCTGGGACACGGCTACCACACCCTGGAAGACCAGGCCCTTTATAACAGGCTGCGGCAGGAAAACATGCACTTCGAGATCTGCCCCTGGTCCAGCTACCTCACTGGTGCCTGGAAGCCGGACACGGAGCATGCAGTCATTCGGCTCAAAAATGACCAGGCTAACTACTCGCTCAACACAGATGACCCGCTCATCTTCAAGTCCACCCTGGACACTGATTACCAGATGACCAAACGGGACATGGGCTTTACTGAAGAGGAGTTTAAAAGGCTGAACATCAATGCGGCCAAATCTAGTTTCCTCCCAGAAGATG…	0.544	500
ADAD1	FALSE	FALSE	FALSE	TRUE	AATAGGCAATCCATTATCACATTAAAAATCTTGTTTTGTTTGGTGTGTTTTGACTAGTAAAAA	0.269841	63
ADAD2	FALSE	FALSE	FALSE	TRUE	AGCCAGCCTCGGCGGGACCGAGGTCCCGGAGCCAAGCTGTACCCCTGCTGGGGGAGTGCCCTATCTGAGGAGCGTTGTGGGGAGAACATGGGTTGTGCGGGGTGAAACTGGGGCTGGAGGGAAGGAGGAGCCTGCTGTGGTTGGGAGGCGGCTGCTGCACGTTTGGGCTTGAATAAAGAAGTATTTCTGGTT	0.614583	192
ADAL	FALSE	FALSE	FALSE	TRUE	GCTATAATGAGGTGAACTACTTCTGAGTATGTGTTTCAATCAAGTTCCTGCCATATCCCACTTAGTAAAACAGTCCACCACTCCTTTGAAGCATAGCAACCAAGTTCCTTGGGCTCTATCACCAGCACCTTACACATGGCAGGTACTCAGTAAATACGTGTCTTCAACTGACTCACAAGCTCTCAGGTGCTTACTGGGTGGGACTTGACTGTTGTTGCTAATTAAATCCCCATTCCACCAGTGATTATTGTGACTCAGCAGTCCTTCCCTATTAGTGATCATAAAATTTCAGGGAAATCGAAGTTTCTCATCAGGAAATGTTTTGGAATTACTAGTATAAAGTTAGGAAAGTGGGGAAATTAGGTTACTGCCGAGACCTTTAAGCCTTCTAAACAGCTT…	0.416092	2610
ADAM10	TRUE	FALSE	FALSE	TRUE	CTGCAGCTTTTGCCTTGGTTCTTCCTAGTGCCTACAATGGGAAAACTTCACTCCAAAGAGAAACCTATTAAGTCATCATCTCCAAACTAAACCCTCACAAGTAACAGTTGAAGAAAAAATGGCAAGAGATCATATCCTCAGACCAGGTGGAATTACTTAAATTTTAAAGCCTGAAAATTCCAATTTGGGGGTGGGAGGTGGAAAAGGAACCCAATTTTCTTATGAACAGATATTTTTAACTTAATGGCACAAAGTCTTAGAATATTATTATGTGCCCCGTGTTCCCTGTTCTTCGTTGCTGCATTTTCTTCACTTGCAGGCAAACTTGGCTCTCAATAAACTTTTACCACAAATTGAAATAAATATATTTTTTTCAACTGCCAATCAAGGCTAGGAGGC…	0.358352	8740
ADAM11	FALSE	FALSE	FALSE	TRUE	TTGTGATCAACGACCACCAGCTGTTCGAGCAGATGCGACAGTCGGTGGTCCTCACCAGCAACTTTGCCAAGTCCGTGGTGAACCTGGCCGATGTGATATACAAGGAGCAGCTCAACACTCGCATCGTCCTGGTTGCCATGGAAACATGGGCAGATGGGGACAAGATCCAGGTGCAGGATGACCTCCTGGAGACCCTGGCCCGGCTCATGGTCTACCGACGGGAGGGTCTGCCTGAGCCCAGTGATGCCACCCACCTCTTCTCGGGCAGGACCTTCCAGAGCACGAGCAGCGGGGCAGCCTACGTGGGGGGCATATGCTCCCTGTCCCACGGCGGGGGTGTGAACGAGTACGGCAACATGGGGGCGATGGCCGTGACCCTTGCCCAGACGCTGGGACAGA…	0.604952	3473
ADAM12	FALSE	FALSE	FALSE	TRUE	GAAGCCGACACCTTTTTTCAACAGTGAAGACAGAAGTTTGCACTATCTTTCAGCTCCAGTTGGAGTTTTTTGTACCAACTTTTAGGATTTTTTTTAATGTTTAAAACATCATTACTATAAGAACTTTGAGCTACTGCCGTCAGTGCTGTGCTGTGCTATGGTGCTCTGTCTACTTGCTCAGGTACTTGTAAATTATTAATTTATGCAGAATGTTGATTACAGTGCAGTGCGCTGTAGTAGGCATTTTTACCATCACTGAGTTTTCCATGGCAGGAAGGCTTGTTGTGCTTTTAGTATTTTAGTGAACTTGAAATATCCTGCTTGATGGGATTCTGGACAGGATGTGTTTGCTTTCTGATCAAGGCCTTATTGGAAAGCAGTCCCCCAACTACCCCCAGC…	0.417517	4898
ADAM15	FALSE	FALSE	FALSE	TRUE	GGCTGTGGTGCTGGTAGCCATGACGGTGGTGGCCGTGGCGAGATGCCCCCTCAGTGCATGAGGGCACATATCCCGGTGGTGCCTTTAATGGTGACAGTCTCAGGGGCCAGCCAAGCCCCCACCCCCAAGGAAGCCACTGCCTGCCGACCCCCAGGGCCGGTGCCCATCGGGTGACCTGCCCGGCCCAGGGGCTGGAATCCCGCCCCTAGTGGTACCCTCCAGACCAGCGCCACCGCCTCCGACAGTGTCCTCGCTCTACCTCTGACCTCTCCGGAGGTTCCGCTGCCTCCAAGCCGGACTTAGGGCTTCAAGAGGCGGGCGTGCCCTCTGGAGTCCCCTACCATGACTGAAGGCGCCAGAGACTGGCGGTGTCTTAAGACTCCGGGCACCGCCACGCGC…	0.658349	521
ADAM17	FALSE	FALSE	FALSE	TRUE	TTTAGTTCTCAGCTCTTCTGACTTAAGTGTGCAAAATATTTTTATAGATTTGACCTACAAATCAATCACAGCTTGTATTTTGTGAAGACTGGGAAGTGACTTAGCAGATGCTGGTCATGTGTTTGAACTTCCTGCAGGTAAACAGTTCTTGTGTGGTTTGGCCCTTCTCCTTTTGAAAAGGTAAGGTGAAGGTGAATCTAGCTTATTTTGAGGCTTTCAGGTTTTAGTTTTTAAAATATCTTTTGACCTGTGGTGCAAAAGCAGAAAATACAGCTGGATTGGGTTATGAATATTTACGTTTTTGTAAATTAATCTTTTATATTGATAACAGCACTGACTAGGGAAATGATCAGTTTTTTTTTATACACTGTAATGAACCGCTGAATATGAGGCATTTGG…	0.35068	1691
ADAM18	FALSE	FALSE	FALSE	TRUE	AAAATCTTTCAAAACTATTACCCCAATATCTGGAAATATACATTATAGTGGAAAAAGCTTTGTATGATTATATGGGATCTGAAATGATGGCTGTAACACAAAAAATTGTCCAGGTTATTGGGCTTGTCAACACTATGTTTACCCAGTTCAAATTGACTGTTATACTGTCTTCCTTGGAATTGTGGTCAAATGAAAACCAGATTTCCACCAGTGGGGATGCTGATGATATATTACAAAGATTTTTGGCATGGAAACGGGACTATCTCATCCTACGGCCCCATGACATAGCATACTTACTTGTTTACAGGAAACATCCTAAATATGTGGGAGCAACATTTCCTGGCACTGTATGCAATAAAAGCTATGATGCAGGTATTGCTATGTATCCAGATGCAATAG…	0.377113	1538
ADAM19	FALSE	FALSE	FALSE	TRUE	ACCTGTCCAAGGGGCTTCTCCCTTTCCTTGAGCTCTCTGGACACTGCAGAGGACCCATGGCCATGGAACCCTGAAGAAGCATGTCTGGCCGCCTCTGAGCTCCTCCCACCCTCCTCCAGGAACCTCCACATCTCCAAAAATCTCCCTGTTGACTCAGTGCCTCCTCGGCTTCCTTGGAAGCCCAGAGGGACTATGATCTGATGGCCTCTAGGTGTTGTTTTGTGCAATATACAGCCCCAGGTAGGGAGGGGAGAGTATGAGGAGGGTGACTGGCAGCTTCTCCTCCAGACTCCTAGCCCCGAGGTGCTGATGGAGATGCTCAAGGCCAGCAAGCCCCTCAGGCCAGCACTTCGCTTGCAGAAGCCATCCATTCACTCCTGGGGTGCAGGGCACGCAAGA…	0.503155	3645
ADAM2	FALSE	FALSE	FALSE	TRUE	TCTGGACAACAGAGATGCCATGATATCACTTCTTCTAGAGTAATTATCTGTGATGGATGGACACAAAAAAATGGAAAGAAAAGAATGTACATTACCTGGTTTCCTGGGATTCAAACCTGCATATTGTGATTTTAATTTGACCAGAAAATATGATATATATGTATAATTTCACAGATAATTTACTTATTTAAAAATGCATGATAATGAGTTTTACATTACAAATTTCTGTTTTTTTAAAGTTATCTTACGCTATTTCTGTTGGTTAGTAGACACTAATTCTGTCAGTAGGGGCATGGTATAAGGAAATATCATAATGTAATGAGGTGGTACTATGATTAAAAGCCACTGTTACATTTCAAA	0.302778	360
ADAM20	FALSE	FALSE	FALSE	TRUE	GAGAAATGGGAAAAAGAAGGAGACTAAACTTTATACTTCATTTTTAATATCCAATTTTTTAATAGAAAAATATGAAGCCATGTCTCACTGTTTAAATAAAACTTCATGGACATTTCATGTCAGGATTGCAAGCATTAGCTATCACAGCAAAGGATTCCTAGCCTATTCTTACTTACTCTACAGTGTCTTAAGCAATATTAAAGGTTCCTTTTCCCAGAA	0.319635	219
ADAM22	FALSE	FALSE	FALSE	TRUE	GATCAACTGTTTACATGTGATACATCGAAAACTGTTTACTTCAACTTTTATAGAAACCCAGGCTCATGGAATCACTGCAAATCTATCTGCTCTTCAGACAATACGAAGACCCTCTGAGATGCTACAGAGGAGAGGAAGCGGAGTTTCACATCTGGTTACCATTTTCTTTTTGTCATTGGCTTAGGATTTAACTAACCATGAAAAGAACTACTGAAATATTACACTATAACATGGAACAATAAAGGTACTGGTATGTTAATGGATAATCCGCATGACAGATAATATGTAGAAATATTCATAAAGTTAACTCACATGACCCAAATGTAGCAAGTTTCCTAAGGTACAATAGTGGATTCAGAACTTGACGTTCTGAGGCACATCCTCACTGTAAACAGTAAT…	0.374336	6398
ADAM23	TRUE	FALSE	FALSE	TRUE	ATCAGCTGCGCTGGATGGACACCGCCTTGCACTGTTGGATTCTGGGTATGACATACTCGCAGCAGTGTTACTGGAACTATTAAGTTTGTAAACAAAACCTTTGGGTGGTAATGACTACGGAGCTAAAGTTGGGGTGACAAGGATGGGGTAAAAGAAAACTGTCTCTTTTGGAAATAATGTCAAAGAACACCTTTCACCACCTGTCAGTAAACGGGGGAGGGGGCAAAAGACCATGCTATAAAAAGAACTGTTCCAGAATCTTTTTTTTCCCTAATGGACGAAGGAACAACACACACACAAAAATTAAATGCAATAAAGGAATCATTAAAAAAAATAGTAAATGATTTTTTTTCCCTCAGCCTGCTGGCACTTAATATCTTCTAAATGATTTGGCATGAT…	0.374822	3503
ADAM28	FALSE	FALSE	FALSE	TRUE	AGCAACAGCTAAGCAAGAACTAATGGCTAAATTATCAACTTGGAAAACTGGAAAATCTGGATGGCAGAGAAATATACTATCTATCTCACCAGTATTTGCTCTCGACTCAAGAAGGTTAACATTTTCTGATTCATGTTAGACTTTGAAGAGACTAAAGAAAATTTTCAAGAGGAACATATGCCTGAGAACCTTTGCATGAATTTAAAATTTCAATTATCCATTCTTATAAGAAGGAAGATGATTGTAAAGAAATATCTCCGAAGTTAAAATCTGTAATAGGAATTGATTCATTCTCTAATGAAAACAAAACATAAAAACATCACACTAATCTTGGAGGAATAAGAAAAATTGTACATCCATTAAATGTACAATTGATTGCAACATCTTGATTGTTTTAAC…	0.350238	4614
ADAM29	FALSE	FALSE	FALSE	TRUE	AGCCAACCTCAGTTGATGCCTTCCCAGAGTCAACCTCCTGTGACGCCCTCCCAGAGCCAACCTCGGGTGACACCCTCCCAGAGTCAACCTCATGTGACACCTTACCGGAGTAAAAGTGGTAAACAAAAGCAATCAGTACCAATTCCAAAAACTGTATCCAGAAAAGGTACATTAAAAAAATAATTCCTAGTA	0.458333	192
ADAM30	FALSE	FALSE	FALSE	TRUE	CCGGGCAATCCATACTCATTCAGTAACACAGGCTCATTTATTTAACCAGCTAATCATTTATCCAAAGGCTTTCCATTCTTCTCCCAATATTTTTTTACTTTAATTTTTCCCACAAGTTTTGATCAGCAAATAAACAGCATTCTTGTTTTGGAAACAAACCAGTGCATTCTACTTCTCGAGTGTTCACTTGCCCCTCAGTTTGTGACCAAGTTGTGGGTATTCTGAGAATCATGCTCTAATGGCTTTTCCATACACTAAAGCTCTGAAAGTAGTGAGTTTCCTAGAATTACCATGCTATTCAAGGTATAGTCTTGTTTCTCAGAATCCCAGGGAACAAAGCAATTGTCTGCCTCTCCCTCTGCCTCCCTCAACTTGATCCATGTGAACATCCGCACCTGC…	0.408353	431
ADAM32	FALSE	FALSE	FALSE	TRUE	TGATTCCTTCAGAAGGCAACGGATAACATCGAGAGTCTCGCTAAGAAATGAAAATTCTGTCTTTCCTTCCGTGGTCACAGCTGAAAGAAACAATAAATTGAGTGTGGATCAA	0.401786	112
ADAM33	FALSE	FALSE	FALSE	TRUE	GGGGCGGTTGGAGCCAGCCCCTACCACACCCTCCCTCTTGCCCCTCTTGCTCCAGCCCTGGCTGAGATTTGGGGCTGGCCCCTTCCTCCCTAGGATCATTGCCACTACCAAGGGCGAGTAAGGGGCTTCCCCGACTCCTGGGTAGTCCTCTGCACCTGCTCTGGGATGAGGTGAGCTCTGGGAGAGGAGGCTGGGCCTGGGATGGGGAAAGAGCTCCCTCACACCCGCTCCTACCCCTCTGCACCCTAGTGGCCTGATCACCCTCAGCAGGAATGCCAGCTATTATCTGCGTCCCTGGCCACCCCGGGGCTCCAAGGACTTCTCAACCCACGAGATCTTTCGGATGGAGCAGCTGCTCACCTGGAAAGGAACCTGTGGCCACAGGGATCCTGGGAACAA…	0.59854	1507
ADAM7	FALSE	TRUE	FALSE	TRUE	GCTTGAAGTTGGATATCCAAAATGGCCGTGCAAGCTTAGGCTGGGGATTCTGGATGCAACGTCTTTACAACCTTACCTAGATATCTGCTACTCACATTTTTGGTAGTGTTTCAAACGTTCTTTATCCAGACAGACAATGTTTAAGAGAAACAACTTATTTCTGTTAATATTTACCGGTAGAATTCACACCCTCTATCATAAACATATGCTGCAGAAAAAAAATGTCTTGTGGTCTTTCAAATGCTCTTTAGCACAATATAAAAATTCGTAACCTTGCTGTAGTATTTTCCTACAAAATGTTACTCTGCTTTCTTTTAAGAATCCAAACTTTAAGGATGATAACTTACAGTCTAAGAAGAAAACATTGCATATAAAAAGTTACTTTTTTGGAAACATAAA…	0.365064	1019
ADAM8	FALSE	FALSE	FALSE	TRUE	GGGTGCTGTTGGCCCAAAGGTTGCCCTGAAGCCCCCCATCCAGAGGAAGCAAGGAGCCGGAGCTCCCACAGCACCCTAGGGGGGCACCTGCGCCTGTGTGGAAATTTGGAGAAGTTGCGGCAGAGAAGCCATGCGTTCCAGCATTCCACGGTCCAGCTAGTGCCGCTCAGCCCTAGACCCTGACTTTGCAGGCTCAGCTGCTGTTCTAACCTCAGGAATGCATCTACCTGAGAGGCTCCTGCTGTCCACGCCCTCAGCCAATTCCTTCTCCCCGCCTTGGCCACGTGTAGCCCCAGCTGTCTGCAGGCACCAGGCTGGGATGAGCTGTGTGCTTGCGGGTGCGTGTGTGTGTACGTGTCTCCAGGTGGCCGCTGGTCTCCCGCTGTGTTCAGGAGGCCA…	0.57546	815
ADAM9	TRUE	FALSE	FALSE	TRUE	AAATGAGTTCTGTATAGGCACTCAGGACTGTTACATTGCACAGCCCCACAGGGTACCTTTAACATTATAACATATGGGTTATCTTGGGAAAAGTGGGTGCATTTCTATAGACTAAGCTGTACCTTACAGCTCTCCAGGTACTCAGTAGTTAAGGTTTTTTTTTTAAAGACTAGGAAAATAAATCTTCTATTTAATGGTAATCCTTACTGATGAGAAAATTTGATATGTTTTGAAAATAGGAGTTTCTGATTTTTTTGTTGAAAGTTAATATCTCTAAAAGTGCACTTATTAAAACATTTAATTTGTCAGTGATATTTAGTAAAGAAAAACACTCATTTGATGTTATGTGTTCTAATGTTCTAAATTTTTTCTGAAAATAATTGTTTCCTAAAAGAGGTG…	0.325182	1922
ADAMDEC1	FALSE	FALSE	FALSE	TRUE	ATATTTGTGAAATGAATATTTCAGTTTTCACATAAAAGAAATATCAGAGAAGCAATAGCCATAAAGCAAACACCTGAATTAACGCTCCATGAAATAGTTTGTCCTAAAAAACTTCACATTTTACACAAAAGAGAGATCAAGAACAACCAGACAGAAAAGCATGGCAAAGAGGAAAGGTATGAACCTGAAGTTCAATATCAGATGATCTTAAATGGAGAAGAAATCATTCTCTCCCTACAAAAAACCAAGCACCTCCTGGGGCCAGACTACACTGAAACATTGTACTCACCCAGAGGAGAGGAAATTACCACGAAACCTGAGAACATGGAACACTGTTACTATAAAGGAAACATCCTAAATGAAAAGAATTCTGTTGCCAGCATCAGTACTTGTGACGGG…	0.403118	1796
ADAMTS1	TRUE	FALSE	FALSE	TRUE	GTGGTTTAAGTGGTGTTAGCTTTGAGGGCAAGGCAAAGTGAGGAAGGGCTGGTGCAGGGAAAGCAAGAAGGCTGGAGGGATCCAGCGTATCTTGCCAGTAACCAGTGAGGTGTATCAGTAAGGTGGGATTATGGGGGTAGATAGAAAAGGAGTTGAATCATCAGAGTAAACTGCCAGTTGCAAATTTGATAGGATAGTTAGTGAGGATTATTAACCTCTGAGCAGTGATATAGCATAATAAAGCCCCGGGCATTATTATTATTATTTCTTTTGTTACATCTATTACAAGTTTAGAAAAAACAAAGCAATTGTCAAAAAAAGTTAGAACTATTACAACCCCTGTTTCCTGGTACTTATCAAATACTTAGTATCATGGGGGTTGGGAAATGAAAAGTAGGA…	0.35917	1832
ADAMTS12	FALSE	FALSE	FALSE	TRUE	GCCCAAAAGGAAGCCAGCTTCCACCAGACTGCAGCAGCCTGCTGACCATGACATGCTTTAGCCCTGGGAGCTGCTTCGTTGAGGTTTTGCTTCATATATTTCAGATTCAGCTTTGGGTCATGATGAAACAAAATCCATTGTGTTCCTCTAGCCACCGAATGTCCCTCACAGGAGGCCTAGGCTGCCGTACTTGCTGCTCCCTGATAGGAAGGTGAAATAGCTAGGAGAATCAGGCAGCACCTGGTATCGGCTCCTGGGAAAGGTGCCAGGTTAGACAGATTTGTGAAATACTGTATTTTTGTTCTCCCTTAAAGATAAAAACAAAGAGACCAGCTATTTCCCTGACTACCTCAAGAGTATCAGGCAACACTTACCCAGGGGACAAATAATCTTCTTAAT…	0.420476	3653
ADAMTS13	FALSE	FALSE	FALSE	TRUE	GCCGGGCCTGAGCCGGGCCTTGTCGCAGCGCAGGACGGGCGCGCTGCGTGTGGGACCCGCCGCGGCCTCAACCCGGGTCCGCGGGGCACCCGCCGGATGCGCAGCCTGGCCTCTACTACAGCGCCAACGAGCAGTGCCGCGTGGCCTTCGGCCCCAAGGCTGTCGCCTGCACCTTCGCCAGGGAGCACCTGGTGAGTCTGCCGGCGGTGGCCTGGGATTGGCTGTGAGGTCCCTCCGCATCACCCAGCTCACGTCCCCCAAAACGTGCATGGATATGTGCCAGGCCCTCTCCTGCCACACAGACCCGCTGGACCAAAGCAGCTGCAGCCGCCTCCTCGTTCCTCTCCTGGATGGGACAGAATGTGGCGTGGAGAAGTGGTGCTCCAAGGGTCGCTGCCG…	0.653455	1867
ADAMTS14	FALSE	FALSE	FALSE	TRUE	GCTGTGCCCTGCCATCCCACTGGCACGTTTACACTCTGTGTACTGCCCCGTGACTCCCAGCTCAGAGGACACACATAGCAGGGCAGGCGCAAGCACAGACTTCATTTTAAATCATTCGCCTTCTTCTCGTTTGGGGCTGTGATGCTCTTTACCCCACAAAGCGGGGTGGGAGGAAGACAAAGATCAGGGAAAGCCCTAATCGGAGATACCTCAGCAAGCTGCCCCCGGCGGGACTGACCCTCTCAGGGCCCCTGTTGGTCTCCCCTGCCAAGACCAGGGTCAACTATTGCTCCCTCCTCACAGACCCTGGGCCTGGGCAGGTCTGAATCCCGGCTGGTCTGTAGCTAGAAGCTGTCAGGGCTGCCTGCCTTCCCGGAACTGTGAGGACCCCTGTGGAGG…	0.589421	1588
ADAMTS15	FALSE	FALSE	FALSE	TRUE	GTGGGGTCATCGCTTTCTCCCCCTCACTCTCCACCCCACTGATATGCCAGCGTTCTGCCAGCTGGAGTAGCGGGCAGAGGACGGTGGCCAGGGGCTCACGCCACGATGTCACCCACATCCGGGGACAAGGACCATGGGCTGGGGCGAGAGGTTCCCTCCTCCTCCCTGGACTGGGCAGAGGGAAGCCCAGGAACTCCCGCACAGTCTACCTCAGGCCCCGCTCCTCGGGCCGGTTGCGGGGAGAGGCTTTGAGGTGCAGGGCAGAAGGTGCTGAGGCCCAGTTTCCAAGGAACTTGGAGGATGGGCACCTTCCAGGCAGAACTTCAGGGACCCCGGCCCCCAGAACGGAGGCCACAGGCTGCTGGAAGAGCCATGTCCCAGCAGCTTGGCACCCTCAGG…	0.556028	2820
ADAMTS16	FALSE	FALSE	FALSE	TRUE	GTTGGGACCGCTCTCCGTAGCAGAGAAAGTGCCTGCGTGGCACAGAAATTTCCCACAAATGAGCTGTGCAATCTACGTCGGAATACATCCAAGGAAGAGCAAAGCCAAAAGAAGAAAACCGTGTTAGGCTCTTTGACCAGGAGTGTATGTATGTGTTTCACTGTGAGCCTGGGTGCAGACCTGTGTCCCCATGCACACAGTGTCTCCTGTCAGGCTGAAATGTGGCACCCTGGCAGACAGAGCTGTGGCTCGTGAGGCAGAAGGCAGGCACCACAACGGGAGAGGCAGCACTCACCCCTGCCTGTTGCAGCTAAATCAAGTCAAAAAGACAGGCGAGGCTGAACTTGCTAAATGTCTGGTGCCTTAGAAAAAGAAGGAAAGGCCATGAAATAAGGAAAA…	0.490566	1166
ADAMTS17	FALSE	FALSE	FALSE	TRUE	CACGCAGTCCCAAGGGTCGCTCAAAGCTCAGACTCAGGTCTGAAACCCACCCACCCGCAAGCCTACCAGCCTTGTGGCCACGCCCCCACCCGGCTGCCACAAGAATCCAACTACATAGAACATGAGCGTGGACTTGGCGTTTGCCATTAGTGCTTCCGTACTTAATATATTGTTAACAGCCACTGGCTGGCTTTCTACAGTGAGGAGAAAGTAGGCATGAGTCACAAAGTAACTTCAATTTCTAGGATTTCAGGTACCTCGAAGGGAAGCACCTCTGGCAGACAACCGTCAAGAGAGAGACATCATTTAGTGTTCTTGTCTTGACTCGCTTTTGACATTTGAATTTCCAGTGCTTGGTATATCATGGAGGAAACATCCCCAAAACGAGACATGCTAGAA…	0.514753	2813
ADAMTS18	FALSE	FALSE	FALSE	TRUE	TCTTGGTGTCCTCCCCAGCACCTTAGGGCCAGGGGCTTACCTTTCAACCTCTAGAGAGACCAGCTGCCTTTGAGACCAGGAGCTGAGCACCGAGAACCATCTGTGAGCTGCCGCTGTGATGAAGGAGCCTGCTCTGAGGAACAGACAGGTTGCCAGTAGGCTTCTAGCTCAATTCCCTGAAGCACGTGGTACTCTGAAGCACTTGAAAATGGGAAGCGATGACAAATCTGACTTTAAAAAAAATCTTTGATTTGCACTGTTATATGCAAGAAGTGGTGAATCACACTGAGATACGTCGATTTGGGGAGAGACCCCCTTTTGAACTTCAAAGGGTTCAAGGGCAAAGACATCTGTTTTAAAAAGGTCCTTTATGACTTCAGGTCAAAGACTGAGACTCAG…	0.364333	1828
ADAMTS19	FALSE	FALSE	FALSE	TRUE	CCTCTAGCAGGCTGGCTGGATCACAGCTCTTGGCAATTACATTATTTATAAACACACACACTAGCATGTTTTTCAGACCAAATATTATCAGATTACATATAATTTAATCAAATTAATTTATTTTTTTGCCTGCCAAACATCCAATGTGGTGCTTGTTTTGGTTACACAAACATTTTGATTTATACTATATGGCTTCATAAATAATTTTATATGAATGAATTAGTTGGATCCAGTAATATAATAAAAAGAAAAAGGAAAAAAATAGATCATTATACTTAAAACAAGTTTTCGTTGTTTGTTAGGGCTATCTCTAAGGTGCTACTCTCTCCCCACCAATAACATTGAATTATCCAGAATGTATACTGACTTAGCATAATAGTTTAGGTGTATATGAAGAGA…	0.323549	1465
ADAMTS2	FALSE	FALSE	FALSE	TRUE	TAAAATGGAAAGATAGCATCCCTAGCATTTTTTTCTTGCTTATAGAGATATTCCATGGGATAGCAAATCCTGTGTCATGGAGATGAAGTCAAAATTCCTGATTCCAAAAGGTTTTGAGAAAACAAAGAGGGGGAATGACGTAAGAAAGATAGGCATGAGCATGTGGTAACTAGGTTAGCACGTGTGCTTCCCAGCCCAGGAGCGACCAAATACTGTGGTGGCGTCAGGTGTGCAGTGGAGAGGAATATAGAGGCTGTATGGCCTCCCTCAGTGAGGGCAGGGCAAGAGGGATCACTCTGAGAGAACAAAAATAGGCCCCAAGTTGCTAAGCAGTGATTGGGAACCTTCCTTTCCTTGGCGGAGATGCATGACATTCCCTACCGATCCCCAGACACAGCC…	0.498011	3016
ADAMTS20	FALSE	FALSE	FALSE	TRUE	AAAGATATTTTTATTAGCTATCTTAGATTGGAAATCCACTTTCTGCTTACTGTGTCTCTGTTCCATCTTCTTTCATTTTATTGGTTTTAGTTTGCAAGCCTAGTTCTTAAGAAGACTGTGGATTACTTTCTTGGAATTTTTTCCCAATTAGGAGAGCAGAATCCTAACTGCTAATGAGATTGAATTGTAATGGCATTTGTTTCTGAGCATAGACGTTTTATTTTCCCTACCCATTCATGACTTCAATTCACCAAGCATTAAACATTTACTTAGGTCTCATGCTTTATATTAGATATTGAAGCAATTAAAATTAAGTGTTTGTGAGTCAGATTCTCTGTTTTAGAGGTCAGCAAACTATGGTCCAGGTACCAAATCTGGCCTGTTGCCTATTTTTAAAAT…	0.309714	875
ADAMTS3	FALSE	FALSE	FALSE	TRUE	GAAAGTGAACCAAAAAGGCTAGAAACCAGAGGAAAACCTGGACAACCTCTCTCTTCCCATGGTGCATATGCTTGTTTAAAGTGGAAATCTCTATAGATCGTCAGCTCATTTTATCTGTAATTGGAAGAACAGAAAGTGCTGGCTCACTTTCTAGTTGCTTTCATCCTCCTTTTGTTCTGCATTGACTCATTTACCAGAATTCATTGGAAGAAATCACCAAAGATTATTACAAAAGAAAAATATGTTGCTAAGATTGTGTTGGTCGCTCTCTGAAGCAGAAAAGGGACTGGAACCAATTGTGCATATCAGCTGACTTTTTGTTTGTTTTAGAAAAGTTACAGTAAAAATTAAAAAGAGATACCAATGGTTTACACTTTAACAAGAAATTTTGGATATGGA…	0.327642	2167
ADAMTS4	FALSE	FALSE	FALSE	TRUE	CCTCACTATCCCGGCTGCCCTTTCTGGGCACCGGGGCCTCGGACTTAGCTGGGAGAAAGAGAGAGCTTCTGTTGCTGCCTCATGCTAAGACTCAGTGGGGAGGGGCTGTGGGCGTGAGACCTGCCCCTCCTCTCTGCCCTAATGCGCAGGCTGGCCCTGCCCTGGTTTCCTGCCCTGGGAGGCAGTGATGGGTTAGTGGATGGAAGGGGCTGACAGACAGCCCTCCATCTAAACTGCCCCCTCTGCCCTGCGGGTCACAGGAGGGAGGGGGAAGGCAGGGAGGGCCTGGGCCCCAGTTGTATTTATTTAGTATTTATTCACTTTTATTTAGCACCAGGGAAGGGGACAAGGACTAGGGTCCTGGGGAACCTGACCCCTGACCCCTCATAGCCCTCACCC…	0.470425	6830
ADAMTS5	FALSE	FALSE	FALSE	TRUE	CCTGTGGTTATGATCTTATGCACAAAGATAACTGGAGGATTCAGCACTGATGCAGTCGTGGTGAACAGGAGGTCTACCTAACGCACAGAAAGTCATGCTTCAGTGACATTGTCAACAGGAGTCCAATTATGGGCAGAATCTGCTCTCTGTGACCAAAAGAGGATGTGCACTGCTTCACGTGACAGTGGTGACCTTGCAATATAGAAAAACTTGGGAGTTATTGAACATCCCCTGGGCTTACAAGAAACACTGATGAATGTAAAATCAGGGGACATTTGAAGATGGCAGAACTGTCTCCCCCTTGTCACCTACCTCTGATAGAATGTCTTTAATGGTATCATAATCATTTTCACCCATAATACACAGTAGCTTCTTCTTACTGTTTGTAAATACATTCTC…	0.330565	6141
ADAMTS6	FALSE	FALSE	FALSE	TRUE	GAAACGTTGTGAATATTATAGTGGCCCGCTTAATTGTTCTCACAGAAGATCAGCCAAACTTGGAGATAAACCACCATGCAGACAAGTCCCTCGATAGCTTCTGTAAATGGCAGAAATCCATTCTCTCCCACCAAAGTGATGGAAACACCATTCCAGAAAATGGGATTGCCCACCACGATAATGCAGTTCTTATTACTAGATATGATATCTGCACTTATAAAAATAAGCCCTGTGGAACACTGGGCTTGGCCTCTGTGGCTGGAATGTGTGAGCCTGAAAGGAGCTGCAGCATTAATGAAGACATTGGCCTGGGTTCAGCTTTTACCATTGCACATGAGATTGGTCACAATTTTGGTATGAACCATGATGGAATTGGAAATTCTTGTGGGACGAAAGGTC…	0.433339	5723
ADAMTS7	FALSE	FALSE	FALSE	TRUE	CTGCGCCAGGATGCACAGACCGACCGACAGACCTCAGTGCCCACCACGGGCTGTGGCGGAGCTCCCGCCCCCTGCGCCCTAATGGTGCTAACCCCCTCTCACTACCCAGCAGCAGGCTGGGGACCTCCTCCCCCTCAAAAAAGGTATTTTTTTATTCTAACAGTTTGTGTAACATTTATTATGATTTTACATAAATGAGCATCTACCATTCCAAAGCA	0.522936	218
ADAMTS8	FALSE	FALSE	FALSE	TRUE	TTCAGGGGGGCAGGGGCCAGTCTTGTGCTCCTGGACATGCGGTACTGAGGTGCAGACAAGGGTCTCCACTGTGGTGACTGGGTCCCTTGGCCATATCAAGGCAGCACGGCCCACCCAGGCCTCCCATTGCCGCAACCCCTCCAGTACTGCACAAATTCCTAAGGGGGAAGAGGAGAGGGTATGGGGCGGCAGACCCTATCATCAACTGTCCAGTGGACTGGACCTTGCTCGGGTTCAAGTAGAGGGCATAGGTTAAAAGGTAAAAGTGCACTTATTGACTCAGACAGGACACTCAGCGTCAGTCTGTTTGCAAAGGACTAGCAAACTTAAATGAAAAAAAAAATTCTATCTGGTTTCCCCGATAAATAATCTACCTCACAGGGGAAAAAATTAGTACAA…	0.508689	633
ADAMTS9	FALSE	FALSE	FALSE	TRUE	CTAAGGTGCTTTGAAGAGGAAGCCATTATGGATGGATGAAGGATAGTAATGCAATACCTCCACCTTAATTTGGGTGCATGTGTATGTGTGTGTGTGTTTGTGTGTGACTTGTATGCTTGTGTGTGTAAATGTGTGTACATATACATATATACATATCTACACATACATATATACACATATATGTGTGTATGTAGATATGTAGACTATCCTAATGATGTAAAGTTTAATATTTATGTTTGAAATTATTTATTGTGATGTAATATTTTTGTACGTAAAATGATTCTATTATGACTGCCTTTGCATGTAGTAATATGACAAAGTGATCCTTCATTATCACGGTACACTATTGTTTACTTTTCATCTGTAAATGTTTTATTGTTACTTTTTTAAAATGAATTT…	0.369314	1473
ADAMTSL1	FALSE	FALSE	FALSE	TRUE	AGATAGGGTGTGGGGAAAAACTCTACCCTGGCCACACGAAGGACTCACGCAACCACCTCGGACAGAACCTAAGCTTTCTTCATTTTATTTATTTATTTCCCCCTCCCCACTCCACACACACCCTTCCAACCTCCTCCACCTCCACCTTCAAGCATAAGGACGTCCGCGTGTTTTCTCTTTCAGTTAGCTGGAGGACAGGATGTTGGGAAAGGAAAGGACAGATGTCTAAAGGAGGTTGCAGAGCAGGCCAGGCAGACAGTGGGGGCTCCCTTGAAGAGCTTCCTCCCTCCCAAACCTGGGTCTCAAAGACCTAGAAAGAGGCAGGCACAGCCCCTGCGGACAGCAGGGAGCCAGAAGGTTTGTAGCCTATTGGTGCAAACATTGGACAAATTCCTGTGT…	0.477519	2402
ADAMTSL2	FALSE	FALSE	FALSE	TRUE	GCCCGGCAGCTGCAGCCCCTTCCAGATGAAGACCAAGCGCCCCTCCTGGGGCTGCTGCAGCTTCTGGGGCCTCCACAGACCCCCCTCCTGCGGGGCACGCTGGCCTAAGAGACGTGGCACTGAGCCTCGGCTGTCGAGAGGGGACTTCCCACGGCCCGTGGACCTTTGTGCTCCTGGGGCAGAGCCTCCGGCACCCAGTGGCCTCCCCCAGACAGAGCCACCCCTGCCGTGGGAACCTGTCCGTGTTCCTGCGTGGATCCTGTGTTTGTGGCTCCCACTCCCCAGCCCCCCAGCAGCCCCCAGCCGAGGGGCCCAGGGCCCACAGCCAGCGGTGGAGGTGTCTTGCTCCGGGCCCGTAGCCCACGCCCTCTCTGGGTGGCAGGGCCTTCTGAAGGAAAC…	0.676336	655
ADAMTSL3	FALSE	FALSE	FALSE	TRUE	ACCTTTGGAGGGGTCATGATGCTGCTGTGAAGATAAAAGTAGAATATAAAAGCTCTTTTCCCCATGTCGCTGATTCAAAAACATGTATTTCTTAAAAGACTAGATTCTATGGATCAAACAGAGGTTGATGCAAAAACACCACTGTTAAGGTGTAAAGTGAAATTTTCCAATGGTAGTTTTATATTCCAATTTTTTAAAATGATGTATTCAAGGATGAACAAAATACTATAGCATGCATGCCACTGCACTTGGGACCTCATCATGTCAGTTGAATCGAGAAATCACCAAGATTATGAGTGCATCCTCACGTGCTGCCTCTTTCCTGTGATATGTAGACTAGCACAGAGTGGTACATCCTAAAAACTTGGGAAACACAGCAACCCATGACTTCCTCTTCTC…	0.365914	2036
ADAMTSL4	FALSE	FALSE	FALSE	TRUE	AAGGGGTCCGGGGCACCTTCACGGTTTTCTGTGCCACCATCGGTCACCCATTGATCGGCCCACTCTGAACCCCCTGGCTCTCCAGCCTGTCCCAGTCTCAGCAGGGATGTCCTCCAGGTGACAGAGGGTGGCAAGGTGACTGACACAAAGTGACTTTCAGGGCTGTGGTCAGGCCCATGTGGTGGTGTGATGGGTGTGTGCACATATGCCTCAGGTGTGCTTTTGGGACTGCATGGATATGTGTGTGCTCAAACGTGTATCACTTTTCAAAAAGAGGTTACACAGACTGAGAAGGACAAGACCTGTTTCCTTGAGACTTTCCTAGGTGGAAAGGAAAGCAAGTCTGCAGTTCCTTGCTAATCTGAGCTACTTAGAGTGTGGTCTCCCCACCAACTCCAG…	0.529015	741
ADAMTSL5	FALSE	FALSE	FALSE	TRUE	GCCCCTGCAGGAGCCCCGGCCACACACAGCAAGAAAGATACATCTGACCAGCCTCAACGTCAACGTATTTCCCCTCTCACCCTGGCTTCCAGGCAGCTCTGAAATACGTCCCACCTGTGCAGCTATGTGACTCCCTCCCACACACGCTTAAGACACCTCTGCATGCAGTCAAAGCCACTGTCACAAGCCGGCAGGCACTGGTGAGGAGGCACTAAGGAGACTCTGACTTTTATTTCGCCTCTCTCCTTGGCTGCCAGGAAGCTCATAGCTATTTATACTCAGAAAGTTTAACGCTGCTTTCTTTCTCTTTGCGCGCGTCACACTTGCTTGGAGACACTGTCATGAACGAGCATGACACCCTGCTGCCCTGGGTACCCAGAAGATCATCTGTTTACTTCC…	0.505517	997
ADAP1	FALSE	FALSE	FALSE	TRUE	CGAGTGCGGCTGGAGGACCACGGACATTGGACTCACTGTGGCTGGACGGAGGGGACCCGTGGATGGGGGGGCTCTGGCGTCCTGAGGCCACCTGGCCCCACCTGCTCCTCAGGGCAGCCCGGCGCGGCCAGGTAGGGCCCGAGCTTCAGCTTCCAGGATGCTTCTCTGGAACCTCAAGGCAGGCAGCCCAGGCCCTGGGCCTGATCTCTAACCCCGTCATGCTGCTGCTGACCACACCCAGCCAACCTGCCCCTCCCTGACCCGGGGCCCCCTTTCCTCCAGGGCCCAGTCTGGCTCCCGAGCTCAGACACAGCCCCCAGGAGCCGCCCACCACGGCTGTGGGAACTTCCAGGCCTCAGCGCAGAGCCCTGCTTGGGGCCAGCACGGTGGGCAGCTGCC…	0.683333	1020
ADAP2	FALSE	TRUE	FALSE	TRUE	CCGAGAAGGATTCCTGTGGAAGCGAGGAAGGGACAACTCACAGTTTCTGAGAAGGAAGTTTGTACTTCTGGCAAGAGAAGGCCTCCTGAAGTACTTCACAAAGGAACAGGGTAAAAGCCCCAAAGCTGTCATCAGCATTAAGGACTTGAATGCCACCTTCCAGACAGAGAAGATAGGGCACCCCCATGGGCTGCAGATCACCTACAGGAGAGATGGCCACACCAGGAACCTGTTTGTGTATCATGAAAGTGGGAAGGAGATAGTGGACTGGTTCAATGCCCTCCGTGCAGCCCGTCTGCAGTACCTAAAAATGGCCTTTCCTGAACTCCCAGAGTCTGAGCTCGTGCCATTCCTCACCAGGAACTACCTCAAACAAGGCTTCATGGAAAAGACTGGGCC…	0.511455	1615
ADAR	FALSE	FALSE	TRUE	FALSE	TATGCTCCAGTGACAGATGGATTAGGGTGTGTCATACTAGGGTGTGAGAGAGGTAGGTCGTAGCATTCCTCATCACATGGTCAGGGGATTTTTTTTTCTCCTTTTTTTTTCTTTTTAAGCCATAATTGGTGATACTGAAAACTTTGGGTTCCCATTTATCCTGCTTTCTTTGGGATTGCTAGGCAAGGTCTGGCCAGGCCCCCCTTTTTTCCCCCAAGTGAAGAGGCAGAAACCTAAGAAGTTATCTTTTCTTTCTACCCAAAGCATACATAGTCACTGAGCACCTGCGGTCCATTTCCTCTTAAAAGTTTTGTTTTGATTTGTTTCCATTTCCTTTCCCTTTGTGTTTGCTACACTGACCTCTTGCGGTCTTGATTAGGTTTCAGTCAACTCTGGATC…	0.467201	2744
ADARB1	FALSE	FALSE	FALSE	TRUE	CCCGGGCAGACATGATGGGGGGTGCAGGGGGCTGTGGGCATCCAGCGTCATCCTCCAGAACCTCACATCTGAACTGGGGGCAGGTGCATACCTTGGGGAGGGAGTAGGGGGACACGGGGGACCACCAGGTGTCCACGGTTGTCCCCAGCATCTCACATCAGACCTGGGGCAGGTGCGCAGTGTGGGGAGGGGATGGGGTGCGTCAGGGCCCAGCATCGCCGCCTGGCATCTCTCTGCCGCAGCATTTCCCCTTCTGAACCGTCCAGTGACTGCTTTCAATCTCGGTTTACGTTTAGAAATTGAGTTCTACTGAGTAGGGCTTCCTTAAGTTTAGGAAAATAGAAATTACTTTGTGTGAAATTCTTGAATAAATAATTTATTCAGAGCTAGGAATGTGGT…	0.508824	4363
ADARB2	FALSE	FALSE	FALSE	TRUE	GCTGCGGGCTCCTGGCTGCTGGAGCTGAGCGGGACGCTGGAGGGATGGGACCGTGTCTGGGGGGCGACGTGGCGGGTCGGCCGGTTCCCTGCATTCGTTTTACTTTGGTGTCCCAGAAACACGCGAGTGTGCAATGTTTGGACGAGCAACAACACAAATTCAGAACGTGCCTCTTTCCAGATCGCTGGCCCCAGAACCCTGTCCCCCACACCCAGGGGCACATGCACTGTTGAGTTAGCGCCGACTCTTCCTGTGGAGTCTGAGGGAGGGGCTCCATTCAGGCAAAGGGGTTTTAGCTGCAGCCTTGGAAGGAGGCACCGACACGACACCAGGCAGGAGTGAGCCTCAGGCCCCGTCCCTGCACCCCACCCCTGCGTGCGCCTCTTGGTGATGCTGGGG…	0.502809	5875
ADAT1	FALSE	TRUE	FALSE	TRUE	TAGCCATGCTGAGGTCATAGCCAGAAGGAGTTTCCAAAGGTACCTTCTCCACCAACTCCAGTTGGCAGCCACCCTGAAAGAGGATAGCATCTTTGTCCCAGGAACTCAAAAAGGAGTGTGGAAACTTAGACGAGACCTCATTTTTGTGTTTTTCTCCAGCCATACACCCTGTGGGGATGCCTCCATCATTCCGATGCTTGAGTTTGAAGATCAGCCTTGCTGTCCTGTCTTCAGAAATTGGGCCCACAACTCATCAGTAGAAGCCAGTAGTAACCTGGAAGCTCCTGGAAATGAAAGAAAATGTGAAGACCCTGACAGTCCTGTAACCAAAAAGATGAGGCTTGAGCCTGGGACTGCAGCCAGGGAGGTCACCAACGGAGCAGCTCACCATCAGAGTTT…	0.485871	2371
ADAT2	FALSE	TRUE	TRUE	FALSE	ACATGTTCTGATGAAAGAACCAAGTGACCCAAAGTGACCTGGACAAGATTCATAGACTGAAAGCTGTTGACATCGTTGAATCATATGTTTATATATTGTTTTTAATCTGCAGGAAAATGGTGTCTCTCATCATTTGCTCTGTTAAGGGAACAAATTAGCACTTTTTAGAAGTCTGACAATTGTAAACAGTTATTAGCTTTTCCAGAAGCTGATTCCCATTTTAAGATGGGGGAAAATTAAGGTTTGAGGTTTTAGAAATTAGCAAGTAGTGCATACCCTTCTAGCCACAAGTGCCCAGTCCAGGCAAGTGCTGACTTCTTAGAGAATGTGTGGCCAGACCCAGGGACCTGGAGTGTGTTTGGACTGCAGTTTGCCACCCTGAGAACACCTTCTCCAGGA…	0.38146	5631
ADCK1	FALSE	FALSE	FALSE	TRUE	GTGGAATTGCTCTCCCTGCCCCATTCTGGTGTCTTTCCACTCCTCAGCCCCTCATCTTGCCTCCACCCAGCTGCTCCATTTTTGCCACATCGTGGCCCGCAGCCCCAGAGTCACTGTCCATGTCACCATCCTTCTCCTCCTTTGGAATCCTCTCCGCACACTGTGGCCCTTGTCTCAGGGCCCACAAGCTGAACTGTGGCATAGCTCTCTCTTCTTCTCCAAGAAGACTCAGCAGCCTACATTCCCATTCCTGGTATGTGCCATTGGGTTGGATGTCCCCACTACTTCCGTTAACCCTTCCCATTGTCAAGATGTGCCACGGGTGCCACTGGGGGCACACTGAACTTGTAGGGAGTGTGATTTTGTTGGAGGTGCACATGGTCTCTGAATTTGACAGAG…	0.527531	563
ADCK2	FALSE	FALSE	FALSE	TRUE	TGGGGCAGTGGCCTCTGTGGGCCCTTGTCAAGAGCTGGAGGCCACTCCCAAGAGCCTCTCCTATGGCAGCTGGGACGTTTTAAAATTGGGACACCAATTTCAAATGTAACCCTCCAGTGGTGGAAGGCACACCATGGCTTCCTCTGCTTGGTTTGAGGGTCTGTTCAAAAGCTTTGGGCCAATTAGGGAGTAAAAGGAGGGAAGGGGCCTATCCATTCCATTGTGGAAGCTGGGCCAGGTGCCAGGGACACTCTCCTTCAGGGAAAATGTTATGTGGAGGAGGACGAATAAATTTATTTTGTTTTCCTGTTTTTCTCA	0.503145	318
ADCK5	FALSE	FALSE	FALSE	TRUE	TGCCCTGGTGGCAGGGGCCATCAGCAACGGGGGCCTCTACGTGAAGCTGGGCCAGGGGCTGTGCTCCTTCAACCACCTGCTTCCCCCCGAGTATACCCGGACCCTGCGCGTGCTAGAGGACAGGGCCCTCAAGCGGGGCTTCCAGGAGGTGGATGAGTTGTTCCTTGAGGACTTCCAGGCCCTCCCCCACGAGCTCTTCCAGGAGTTTGACTACCAGCCAATTGCTGCCGCCAGCCTGGCACAGGTGCACAGAGCCAAGCTGCACGATGGCACCAGCGTGGCTGTGAAGGTGCAGTACATCGACCTGCGGGACCGCTTTGATGGGGACATCCACACCCTGGAGCTCCTGCTGCGGCTCGTTGAGGTCATGCACCCCAGCTTTGGCTTCAGCTGGGTCCT…	0.657215	1587
ADCY1	FALSE	FALSE	FALSE	TRUE	TGGAGCCCACGTGGGCCTCTGGGGTGCACATGGGGTGGGAATGCTCCGGGGGTGACACAGGCCACGGTGGCTCCAGCCAGGACCAGCCAGACCAGCAGAGCAGGGAGCCACTTGCCAGGGTGGAGGAGGAGCATTGTCCAGGCATGGCCTGTGGCCCGAGGGCCAACCACCGAGCAGGCACAGCACAGCAGTGACTCGGTGAGGGGAGGACACCCGACTGTGCACACTTCCAGGCCTCCCTGGAGAGGTGTCCACTCCATCCTTCCCTCCGTGGCGTAGGGAGCACTGTTTCTTTCCAGCAAGCCTGTTCAGGTTTGGCCAGGTCGGCATCAATGTAAGGACCTTCAGAGCATCCCAGGGTTACAGCAAGAGCCACTGAGGTGTGGCTGGCAGAGCAAC…	0.528232	9121
ADCY10	FALSE	FALSE	FALSE	TRUE	TCTTACCTTGGTGTGCACACGTGCTAAGATTTGCCTAATGATGTTGGGAGGTGAAGCTGAAGTGATGAGAGTTGTGCAGGGACTTACTTCCTCATCCACCTCCCAAAATGACCCTGGCAAAGGAAGTGGGGGTGATTCATAATTCATTTAAAAACTGAAGACCAACTTCTCACAGATGTGGGGATGCTGTTCAAGGCATACATGTATTTGAATGAAGGACAGAAGTTGCTAAAAACTCTCAAGAAGGACAAATCTTGGAGCCAGACATTTGAGTCTGCCACCTTTTACAGCCTCAAAGGTGAGGTCTGTTTCAATATGGGCCAGATAGTGCTTGCCAAGAAAATGCTGAGGAAGGCACTGAAGCTCCTCAACCGAATCTTTCCTTACAACTTAATCTCC…	0.449195	1801
ADCY2	TRUE	FALSE	FALSE	TRUE	AGAGTCACCTTCATTTTGGCAAGAAGACTGTATTTTCAGGAAGGTATCACACACTTTCTGACTGCAACTTCTGTCCCTTGTTTTTGATGTGCGTGCTGTCTGTCCTATGGAGCCTCTGCAGACTCGTTCTCGTGACCCAGTGGCATACCGTTTGGTGTCTGATGTGTGCCCAGATCGTTCTGCCACTTGCACTGTGCTTGCTCCTAAGCAAAAGGGAAAAGGAGCGCGCGTGATAGAAGAAAAGCACTGGGAGAACTAACAGAGGAGAAAGGTGAAACACACACACATTCTTAAGGCAATAAAACTAGGGGGTGTATATTATCTTCTGGTGCATGTTCTTTTCTGGAAAATATGGTAGCTCGCCAACCGCATCTGCTCATCTGATATTCAAACACACAG…	0.457944	3210
ADCY3	FALSE	FALSE	FALSE	TRUE	ATGGCCTCGAGCCTGCAACAGTCCAAACCGGAAGGGAGAATTTATTTTTTGAAACTGAAGGAAGTCCCGACCTTCCTGGATTGAAGTGCACACTCATGGACTTTAGGTTTAGAAACCTCCTCAGCCTTCATTTGTTCGTGGATGTGTGAGCTCTGAGGGTGGCCCTGCTATTCCTGTGTGTGCCTGTAGTGTCCCCAGCATAGGGGTCTTAGGCATAGGGCTGAACAGTCCTTCCAGAGCCCTCGTTCCAATCCCTGCCGTCCTTGCCCCTGAGGGGCCCTGACCACTGTGAGCAGGAGGGTGGCAGAGCTGGGACAAAGCTGCCTTTGCCGCTGGGCTTTCCGGGACTGTGGAGGGAGCACAGGCGGGGAAGCTCCACTTCAGACAGGGCTTGGTGGG…	0.48886	763
ADCY4	FALSE	FALSE	FALSE	TRUE	TGTCACACTGGCTAACCACATGGAGGCAGGCGGTGTACCAGGGCGAGTGCACATCACAGGGGCTACCCTGGCCCTGCTGGCAGGGGCTTATGCTGTGGAGGACGCAGGCATGGAGCATCGGGACCCCTACCTTCGGGAGCTAGGGGAGCCTACCTATCTGGTCATCGATCCACGGGCAGAGGAGGAGGATGAGAAGGGCACTGCAGGAGGCTTGCTGTCCTCGCTTGAGGGCCTCAAGATGCGTCCATCACTGCTGATGACCCGTTACCTGGAGTCCTGGGGCGCAGCCAAGCCTTTTGCCCACCTGAGCCACGGAGACAGCCCTGTGTCCACCTCCACCCCTCTCCCGGAGAAGACCCTGGCTTCCTTCAGCACCCAGTGGAGCCTGGATCGGAGCCG…	0.567731	2975
ADCY5	FALSE	FALSE	FALSE	TRUE	CAGCTGTTGGCCAATGGTGCCAGGCAGCCTGGCCTCCAGAGGCATGGAAGCAGCTTCTCTGTGTGCCGGGGGTGGCGGGGAAGCCATGCTCCAGCCCGCAGGGCTGCGCTGCTGAGATTTTCCACTTGGACTCCAGAGCAGCTTCTGCCTTTGCTGGTGGGCAGCGGCCTCTGTCCCAGGCCCCGGGGTGCCAGCGTCCTGCGAGCACCCAGCTGACCAAAGATGTTTCCCTCTGTAGAAGACTCTGCTAGACTGGGTCTGAAGCTTGAGTTTTCTAACAGGTGCTGCTGCACAGGTGGAAAGGAGCCGTGGGAATGTGTGTGTGGCACGGCCCAGACAAGGGCAGGGCTGAGGGGCCTCCGACTCAGCTGGGGGTAGACGGGCTCGAATGTGGCCTGG…	0.521194	2312
ADCY6	TRUE	FALSE	FALSE	TRUE	CAGGGCCCAGCCACAAATTCAGCTGAAGGGACCAAGGTGGGCATTGAGTGGACTCTGTGCTCACTGGGTGGAGCTGTGGCAGGGGGCACTGAGCCTCCAGACCCTGCTAACCACAAAAGGGAACATCCCAGCAGGCTGTGCTTGGATCATGCTCGTCTGCCCTCAAGCTGGAAAACAAGGGGCTACCTACCGAGAGGATTATGCAAGTGACTTTCTTTCTTACTTGGGGTAGGGCTGTTCCCTCTCCAATCTTCCAGCCTTTGGGAGCAGGGGAGGGGTCAGTAGCAGAAGCAGAGGGAGGCCTCTTGCCTGAGGGATTAAAATGGCAGCTTGCCATGCCTACCCTTCCCTGTCTGTCTGGGCAGCAGGTTCAGGGCTGAGCCCTTCTTTTCCCTCTTT…	0.537819	2393
ADCY8	TRUE	FALSE	FALSE	TRUE	AAGCATTTTCTTTCTGTTTTTTTTTTTTGTATTTCTTTTATATATAAAATAAATATACTAATAAAAAGGTTTAATTTTTTTTAGAACAA	0.134831	89
ADCY9	FALSE	FALSE	FALSE	TRUE	GGCGGCGCCCACCCGCTGCCCGAGGTGCTCTGTTTGTCGAAACACAGTAATATTTGTATTTGGCTGTTGTGCTTTCCAAGCGCCACAGTTGCCCTCCCCGGACGTGGTGTTATGTGGTCATTTCAGCCCTAACTTCTGTGTGGATCACAGTTATTCAGGGTTCATTTTCATCCATTCTTCCCTTTCGCTCCCTTCCCTGGAAACCCCGCTGCCTCTGGGTCATCCGTTCAGCACGTGGTGGAGAACAAGTGCCTTCAGGGCTGGCCTCGGCCTCGAGTCTCGGGACAGAGGCCGCCAGTGGAGATCATGGCTTTGGGTATTATTTGACTTTTAGAACAAAAGCTGTGGTTAAGATCTCATTTTTATTGCTTTTTCCCACGTCCCACGAGACACTATTTT…	0.520487	3124
ADCYAP1	FALSE	FALSE	FALSE	TRUE	CGATGGGTTACCAGCTACCCTGTGTATACAGCCCTGACGCAATGAAAAGTCGTTTTCCAAACTGACTCAACAGTCATCGCTCGTGTGTTCTATCCAAACATGTATTTATGTAATGAAGTAAAGCCATTAAATGAATATTTTGATAATAATATTGTTTTTCTTTCTACAAAGCACTAGAGAATGCACAGATATACTTTGTGGACCAATTATTGATATATATTATAAATATATATAAAGAATATATATATATATATATATATATATATATATAAAGTATAGAGAGAAGTTCATACAAAGCGTGCACAAGGATTGAAAATTCGCCCGAGCTGTTTATGTTTTTATAAAAATAAATAGAAAAGTAGACAATCATTGTTTTGAATATTACTCCTATTTTTGTAA…	0.372881	2537
ADCYAP1R1	FALSE	FALSE	FALSE	TRUE	GCCATGCTCCCCTCCTCCTCCTCTCCTCCATCCACAGGCTGGGACCGCAGGCAGGTGCCAGCCCACGCATGTTTGCGCCTCTTCCCTCCCCTTGGGCAGGCCCTGGGCTGGAAGCTTGGCTCCTGAGGGGGGAGAAGGAGGCAGGGCACAGACTGGAATTGTCCCCTCCTTGTTTTGGTACTGGTCCCACCCACTGTGGTCCCCTGGGCCCTGACCCCAGACATGTAAATACTCCTCAAATTTGGAAAAGTTGTCCCATCCCTTCCCCCTTTGCCCCAGTGTCCCTGCTCACTTCCAGTCAGGTCTCAGCTCCACCCCACTGTTTCTTGGTCAGCCTCAGTGATGGCCTGACCCCAGCTGTGAGGCCTTGTGAGCTAAGGCTGAAGAGACCTTGCCTGT…	0.519082	4795
ADD1	FALSE	FALSE	FALSE	TRUE	ACTCTGGCCGGGGCGACGAAGCTTCCGAGGAAGGGCAGAATGGAAGCAGTCCCAAGTCGAAGACTAAGTGGACTAAAGAGGATGGACATAGAACTTCCACCTCTGCTGTCCCTAACCTGTTTGTTCCATTGAACACTAACCCAAAAGAGGTCCAGGAGATGAGGAACAAGATCCGAGAGCAGAATTTACAGGACATTAAGACGGCTGGCCCTCAGTCCCAGGTTTTGTGTGGTGTAGTGATGGACAGGAGCCTCGTCCAGGGAGAGCTGGTGACGGCCTCCAAGGCCATCATTGAAAAGGAGTACCAGCCCCACGTCATTGTGAGCACCACGGGCCCCAACCCCTTCACCACACTCACAGACCGTGAGCTGGAGGAGTACCGCAGGGAGGTGGAGAGGA…	0.552708	2419
ADD2	FALSE	FALSE	FALSE	TRUE	TTCATGACACCCTTGGGCTCCCTCCTGCCTCCTCTCTCTCCTCCCCTTCCCTTCTCCCATCTCTGTCCCTGCAAGCACAGGGCTAAGGAGGGATAGAGTAGGACCCTGGACCACATTCGGAAGGGGAACTTAGAGATCACCCGACCAACCCTTCGTTTTACAGTTGCCCAAGAGAAATCAGGTGACTTGCCCAAGGTCACACAGCTAGTTAGCGGCAGAGCCTGCACTCGAATTCAGGTCTCCTGACTTCCAGTCCAGTGCTCCTTCTACTACACAACACTGCCTAGTTGTGGGCTGCCTTTGTTTGGATGCTGTCCACCAATCTGAGCCTAGGGCAAGAAGGCCAGAAATGGGCCGTGAGCTCTCACAGGCTCAGACTAAATCAGAGGTCAAGGCTTC…	0.458365	6641
ADD3	FALSE	FALSE	FALSE	TRUE	ATAAAGTCTTTTTATAATTATTATTATAACAATGTGACATTGCACATCTAAATACCACATTTAAGTTGATCATTAATATGCAATGGTAGATCAGATTGGGGGATGTAGCAAACTGGACTTTAAGAACTGGAAAGAGGTTTTACAAAAGAAAAACTTTCAGATTCATCTCTCATTTTATATGTCCAGAAATGGCTTTGAATTTTAAGCAATTACTAGTTTTAATTAGCTCTGCCCTCATGAAGTATTATTATAATTCACCATAAACAGCTATCTGTCTGAATTACTTCAGGCCTTCTCCATAATATCTGTTAGAAAGAAATTGCCAGTGAGCAAGTGAGAATTTTTATTTCTCAATACCTGCTTCACTTGATAATCATATTATAATTTTTTATCATGATT…	0.309194	1947
ADGB	FALSE	FALSE	FALSE	TRUE	GTTTAAGCTGTCAGATGAGGCCAGCTCTGAAAGCAAAATAGCAGTGTTAGATTCTAAATTAAAAGAACCAGGGAAAGAAGGGAAGGAGGGAAAAGAAATAAAGGATGGAAAGGAAGTAAAAGACGTGAAGGAATTCAAACCTGAAAGTTCTTTGACAACACTAAAGGCTCCTGAGAAAAGCGACAAAGTTCCAAAGGAGAAAGCAGATGCAAGAGACATTGGAAAGAAGAGAAGCAAAGATGGAGAAAAAGAAAAATTCAAATTCTCACTTCATGGTTCAAGACCCTCATCAGAAGTGCAGTACTCTGTGCAGTCCCTATCAGATTGTTCTTCTGCAATACAGACCTCTCATATGGTCGTATATGCGACATTTACACCTCTTTATTTGTTTGAAAACAA…	0.392105	6080
ADH1A	FALSE	FALSE	FALSE	TRUE	GACAATACAGATGTTTTCCCTTGTGGCAGTCTTCAGCCTCCTCTACCCTACATGATCTGGAGCAACAGCTGGGAAATATCATTAATTCTGCTCATCACAGATTTTATCAATAAATTACATTTGGGGGCTTTCCAAAGAAATGGAAATTGATGTAAAATTATTTTTCAAGCAAATGTTTAAAATCCAAATGAGAACTAAATAAAGTGTTGAACATCAGCTGGGGAATTGAAGCCAATAAACCTTCCTTCTTAACCATT	0.354086	257
ADH1B	FALSE	FALSE	FALSE	TRUE	GGCAATAGAGATGCCTTCCCCTGTAGCAGTCTTCAGCCTCCTCTACCCTACAAGATCTGGAGCAACAGCTAGGAAATATCATTAATTCAGCTCTTCAGAGATGTTATCAATAAATTACACATGGGGGCTTTCCAAAGAAATGGAAATTGATGGGAAATTATTTTTCAGGAAAATTTAAAATTCAAGTGAGAAGTAAATAAAGTGTTGAACATCAGCTGGGGAATTGAAGCCAACAAACCTTCCTTCTTAACCATTCTACTGTGTCACCTTTGCCATTGAGGAAAAATATTCCTGTGACTTCTTGCATTTTTGGTATCTTCATAATCTTTAGTCATCGAATCCCAGTGGAGGGGACCCTTTTACTTGCCCTGAACATACACATGCTGGGCCATTGTGATT…	0.367524	2876
ADH4	FALSE	FALSE	FALSE	TRUE	ATGCAAAGCAGCCATCGCCTGGGAAGCAGGCAAGCCCCTTTGCATTGAAGAGGTTGAAGTAGCTCCCCCCAAGGCTCATGAAGTTCGCATTCAGATCATTGCTACCTCTCTGTGCCATACTGATGCCACTGTTATCGATTCTAAATTTGAGGGCCTAGCTTTCCCAGTGATCGTTGGCCATGAGGCTGCAGGTATTGTGGAAAGTATTGGGCCAGGAGTGACCAACGTCAAACCAGGTGACAAAGTAATTCCACTTTATGCACCTCTATGTAGAAAATGCAAGTTTTGTCTGAGTCCACTCACAAATTTGTGTGGGAAAATCAGTAATCTCAAAAGTCCTGCTAGTGATCAACAACTAATGGAAGACAAAACCAGCAGGTTTACCTGCAAAGGAAAACC…	0.449634	1092
ADH5	FALSE	FALSE	FALSE	TRUE	TTCAAAAGAGAAAAATAATGTCCATCCTGTCGTGATGTGATAGGAGCAGCTTAACAGGCAGGGAGAAGCGCCTCCAACCTCACAGCCTCGTAGAGCTTCACAGCTACTCCAGAAAATAGGGTTATGTGTGTCATTCATGAATCTCTATAATCAAGGACAAGGATAATTCAGTCATGAACCTGTTTTCTGGATGCTCCTCCACATAAATAATTGCTAGTTTATTAAGGAATATTTTAACATAATAAAAGTAATTTCTACATTTGTGTGGAAATTGTCTTGTTTTATGCTGTCATCATTGTCACGGTTTGTCTGCCCATTATCTTCATTCTGCAAGGGAAAGGGAAAGGAAGCAGGGCAGTGGTGGGTGTCTGAAACCTCAGAAACATAACGTTGAACTTT…	0.361362	1439
ADH6	FALSE	FALSE	FALSE	TRUE	ATCTAGATCCACTAATTACTCATACTCTGAATCTTGATAAAATCAATGAAGCAGTTGAATTAATGAAAACTGGAAAATGGTAAACTGCCCACATAAATTTTATGTCTGTGTGTTTGAGACCAAGAGAAAGGGTGTATTGGCTTGGGAGTAGAAGAAGGGTCGTCCCTGCTGCAGAAGCTGTATACTGATAATTGAAGAGGCTTTCAGGAATTTGTAAAGCATCTCCTTCCCCTCTGCATTTTGTTTTATTTCTAGCTAATAAAATACATAATCCTGAAAGTATTTAAGTGTTCACCTACCGTTACTTTTGCCATTAGCATTGTATTTCCAATATGGATTTTTTTTTTACATGACATATTAATGGAAGTCAGCTTATAAAATTGTAGCTCAAGTTTAAAA…	0.397718	2366
ADH7	FALSE	FALSE	FALSE	TRUE	GATCCAAAGTGGCAGGAGGTCTGTGTTGTCATGGTGAACTGGAGTTTCTCTTGTGAGAGTTCCCTCATCTGAAATCATGTATCTGTCTCACAAATACAAGCATAAGTAGAAGATTTGTTGAAGACATAGAACCCTTATAAAGAATTATTAACCTTTATAAACATTTAAAGTCTTGTGAGCACCTGGGAATTAGTATAATAACAATGTTAATATTTTTGATTTACATTTTGTAAGGCTATAATTGTATCTTTTAAGAAAACATACACTTGGATTTCTATGTTGAAATGGAGATTTTTAAGAGTTTTAACCAGCTGCTGCAGATATATAACTCAAAACAGATATAGCGTATAAAGATATAGTAAATGCATCTCCTAGAGTAATATTCACTTAACACATTGA…	0.284104	887
ADHFE1	FALSE	FALSE	FALSE	TRUE	ATATGGAGCAGCAGTTACAAAGGAAGTAGGAATGGACCTAAAAAACATGGGTGCTAAAAATGTGTGCTTGATGACAGACAAGAACCTCTCCAAGCTCCCTCCTGTGCAAGTAGCTATGGATTCCCTAGTGAAGAATGGCATCCCCTTTACGGTTTATGATAATGTGAGAGTGGAACCAACGGATTCAAGCTTCATGGAAGCTATTGAGTTTGCCCAAAAGGGAGCTTTTGATGCCTATGTTGCTGTCGGTGGTGGCTCTACCATGGACACCTGTAAGGCTGCTAATCTGTATGCATCCAGCCCTCATTCTGATTTCCTAGATTATGTCAGTGCCCCCATTGGCAAGGGAAAGCCTGTGTCTGTGCCTCTTAAGCCTCTGATTGCAGTGCCAACTACCTC…	0.470186	2046
ADI1	FALSE	TRUE	FALSE	TRUE	CAGTGCTGCCTGGGAACTAACACGTGCCTCGTAAAGGTCCCCAATGTAATGACTGAGCAGAAAATCAATCACTTTCTCTTTGCTTTTAGAGGATAGCCTTGAGGCTAGATTATCTTTCCTTTGTAAGATTATTTGATCAGAATATTTTGTAATGAAAGGATCTAGAAAGCAACTTGGAAGTGTAAAGAGTCACCTTCATTTTCTGTAACTCAATCAAGACTGGTGGGTCCATGGCCCTGTGTTAGTTCATGCATTCAGTTGAGTCCCAAATGAAAGTTTCATCTCCCGAAATGCAGTTCCTTAGATGCCCATCTGGACGTGATGCCGCGCCTGCCGTGTAAGAAGGTGCAATCCTAGATAACACAGCTAGCCAGATAGAAGACACTTTTTTCTCCAAAA…	0.398876	1602
ADIPOQ	FALSE	TRUE	FALSE	TRUE	TCACCACTAACTCAGAGCCTCCTCCAGGCCAAACAGCCCCAAAGTCAATTAAAGGCTTTCAGTACGGTTAGGAAGTTGATTATTATTTAGTTGGAGGCCTTTAGATATTATTCATTCATTTACTCATTCATTTATTCATTCATTCATCGAGTAACTTTAAAAAAATCATATGCTATGTTCCCAGTCCTGGGGAGCTTCACAAACATGACCAGATAACTGACTAGAAAGAAGTAGTTGACAGTGCTATTTTGTGCCCACTGTCTCTCCTGATGCTCATATCAATCCTATAAGGCACAGGGAACAAGCATTCTCCTGTTTTTACAGATTGTATCCTGAGGCTGAGAGAGTTAAGTGAATGTCTAAGGTCACACAGTATTAAGTGACAGTGCTAGAAATCAA…	0.41926	3759
ADIPOR1	TRUE	FALSE	FALSE	TRUE	GCCTTCCCACCTGCGGGGTGGAGGAGGAACTTCCCAAGTGCTTTTAAAAATAACTTCTTTGCTGAAGTGAGAGGAAGAGTCTGAGTTGTCTGTTTCTAGAAGAAACCTCTTAGAGAATTCAGTACCAACCAAGCTTCAGCCCACTTTCACACCCACTGGGCAATAAACTTTCCATTTCCATTCTCCTAGCTGGGGATGGGGCATGGTCAAACTTAGCCATCCCCTCCTCAGCAAGGCATCTACCGGCCCCTCACAGAGACAGTACTTTGAAACTCATGTTGAGATTTTACCCTCTCCTCCAACCATTTTGGGAAAATTATGGACTGGGACTCTTCAGAAATTCTGTCTTTTCTTCTGGAAGAAAATGTCCCTCCCTTACCCCCATCCTTAACTTTGTAT…	0.408	750
ADIPOR2	TRUE	FALSE	FALSE	TRUE	TACCTACCAGTCTCCAGGGACTATGACCCTAAACCAGGGCCTGCGGCACTTGCGGGCCTCCCTGCTGGCTACTGATGCCAGTACCAGAGGAGCCCCAAAACTTTGACAGCCTCGTGGGCTTTGTGACGGCCCAGTGGCTCTGCGTGGTACATGACTGAGAAGAGAAAAACAAAAATAAATCATACCTCAAAGGATGGAGTGCATCAATTGGGAGAAAAGGAGACATAGCCCAAACCCTGGCTTATTCTTGGGATCTACTGATTGCGGGCTCTGCAAGACCCTTGGCAAACTGGCTTCTGATCCATATCATATTTATTTGTAGAAGATGGCGAAACAGTTTAGCTGGTGGTTCTTTCTTCTCCCTTTCTCTCTCTCTATGACAATAATACAAACCAATTT…	0.453952	2606
ADIRF	FALSE	FALSE	FALSE	TRUE	CAGCAGGGAGACTTGGGTCGGCCTCCTGAAATGACAGCAGGGAGACTTGGGTGACCCCCCTTCCAGGCGCCATCTAGCACAGCCTGGCCCTGATCTCCGGGCAGCCACCACCTCCTCGGTCTGCCCCCTCATTAAAATTCACGTTCCCACCCTGTGTCCACTTCATGATTCCTCGCAAGCTGGGCCCAGTCCTCTCATCCCAAGAGCAGAGCCACCGTAGCCGGAGTCCTAGCCTCCCAAATTCGGAAATCCAATCCAACGGTCTCAGGAATGTTTTCCATCCCGCCACGCGCCTCCCGAAGCTCCCAGACCGGAGGCTCAGCCCCCATCTCGGTAAAATACCTGTTTTCTGACAAGACTAGGACTCTTACATAGACTGCCATGAACTACAAGAAGTAT…	0.560386	414
ADK	FALSE	FALSE	FALSE	TRUE	TGGAAGAGCTGAAAACACAAGCCCAGGAGTGCAGACACTGCCCTAATTGCTTCCTGAGAATTCCCATATTAATAAAGAAGAAAATTATCTGCCATTTTTTCCTACTATAATAATGCTGAATCTTAATTTAGAGGGTACAAGGGTATGGTAATGCTTGTAGAATCTTTATTATCTCAACAATCTAAAAAATGATGTTTATTTCCATAGTTTGATAGTGCCACTTAAATGCCAATTAAACAAGAATATAACATTTCAATAGAAATTTTTATTTCATTTTCAATTACTTTGTAAATTCGTGTGTATTTAGTACACTGATTTGTTTTTTTACATTTCTGCTTTGAATGCAGATGCAATTTAATATAATAGATTTTTTAATGAATTAATCTTAACATAGTAATC…	0.285548	858
ADM	TRUE	FALSE	FALSE	TRUE	GATTTAGGCGCCCATGGTACAAGGAATAGTCGCGCAAGCATCCCGCTGGTGCCTCCCGGGACGAAGGACTTCCCGAGCGGTGTGGGGACCGGGCTCTGACAGCCCTGCGGAGACCCTGAGTCCGGGAGGCACCGTCCGGCGGCGAGCTCTGGCTTTGCAAGGGCCCCTCCTTCTGGGGGCTTCGCTTCCTTAGCCTTGCTCAGGTGCAAGTGCCCCAGGGGGCGGGGTGCAGAAGAATCCGAGTGTTTGCCAGGCTTAAGGAGAGGAGAAACTGAGAAATGAATGCTGAGACCCCCGGAGCAGGGGTCTGAGCCACAGCCGTGCTCGCCCACAAACTGATTTCTCACGGCGTGTCACCCCACCAGGGCGCAAGCCTCACTATTACTTGAACTTTCCAAA…	0.494709	756
ADM2	FALSE	TRUE	FALSE	TRUE	GGTGGGGCCGGGCCACACCCCTGCCCATCCCAGCCAGGGTGCTGTGCCCCCGTCCAGAGCTGCAGCTGAGCCCCATCTGAAGCCCAGTCCCTCGGAGCTGCAGACAGCAGGTCCTGCAGCAACAATACCTGCACGGCTTTGCACACGTAAACCTAGGCTGGTCTACACGCAGTGCTGGTACGTCAAGGAGCCTAAACACCCTGAAATTGTGACCCCCTGGGGGACAGCTGCCAGACACAGCTGGCGGCAGCACCAGATGCTAAGCGCTTCAGAGAGGAGGTGTCTGCCCAGAGATGTGGAGCAGAAGCTGGGCCCTGAACACACGGGGCCATGTCTGGACGAGCAGGGGAGAGAGGCTGAACTGGCCAGAAGTGGCCCCTCCGCTGCTGGTCCAGTCAG…	0.606446	3537
ADM5	FALSE	FALSE	FALSE	TRUE	GTTGGACCTAGAAGCACACGGGACCAGGCTGGGCGAAGAACACTGACGCCCAGAGCCGAATAAACAAGAGTTCCGTGTTTCA	0.54878	82
ADNP	FALSE	FALSE	FALSE	TRUE	GTGCCAGGTTCCCTGGCGTTGGTGACATGCTGCAGCCTGGAACTCTGATATCCAGTGTGACTGCAAAGCTGTCTTCTCACTGGTACTGCCTTGTGAGTACTGGTTGGACTGTGGGGCATGTGGCCGCTGCAGTTCCAGTGGTTATTTCTAAGTCTATGACAGGACAGGCTGTTCTTGCTTCAGAACCTTCTCTGACAGACACGGTAACTAAATGTGAAAAACCAATAAGCTGGTGACTCATGAATACACACGAGGAAAAGCAGAGGTTTATTTTATCTGCCTTTTCAACATTTCTTTCCCTCTGTGAAATGATTGGTCAGATGTCTTTGAGAAGTGTTAAACTAATTCACATGGTAGTGTAGGGCCAACATACAAGCTACCAGTCTAATGTGTATAGTA…	0.388509	2489
ADNP2	FALSE	FALSE	FALSE	TRUE	AACTTGCAAAAAAAAAAAAAAGTAACTCTAAAGTAGTAGGTAGATTTTTTTCAGTTGAAATTTCACAGTGTTGTCCTCACTGTGTTGGTGAATCAACCTCAGTGGTCACTGTGCTGCTCTGCAGAGTTACTTCAGGTGCTGGAGAGACCCCTGTTACCAGGAAGCCAGTAGTTATTTCACATCTATTGTTTCCTGCAGTTTGATTTGTAACAGAACAGTTGTTTTCAGGTTTTTTTCTCTGTCATGTAAATGAAATCTTTTGATATTTCATGCACGCCTTGTTTTCCCACTAGTGTCAGTATCGTATGATAAGAAACTGAAATCTATAAATAATTTGCTTTTTCATTAAGGACATTTCAGCCTTTTTCAGAATACTTGATTTAACTGCGAGTGGAAGCA…	0.360571	1542
ADO	FALSE	FALSE	FALSE	TRUE	AGCCACTGGCGCCCAGGAGCGGTGGGCCGAAGACGTGCCCTACCCTACCACAAGGGCTGTGTCTCTACCCCCTAGCCTGGGCGTTGGATCTACTGGAATGAGCAGCAGCCGCTTCCTCGGCAGCCTTGGGAAGCACGGGCGACTGGACAGCAGCCGCCGGGCACGGTTATGGGGGCGGGGTGGGCGGGGAGGCTAGATTGTTTCCTGGTACTGTCACTGCCACTGGGGCTTTGATTTGGAGGAATGGGGCAGGGGACTATCTGAAGCGCTTCCATCCTAAAGCCATAATGAAAATATCTTCCTCTCTTCCCCATTCTATACAAAATACTAAGTGGTTTTCTTGCTCCCACTCCCTACCCCTTAGTTAAATAGGGTTTATTTTCCACTCATGCCCTTATG…	0.382612	2611
ADORA1	FALSE	TRUE	FALSE	TRUE	ATCCTGAAGACTCAGCCCTCGAGCAAAAGACATGCACCTCCCCACTCACCGGGCCCTGGAAGAGGAGGGTGCTCCTCTTAGAGGCCCCTGGAGGCCAGGCGTGCCTCAGAGGGGCCTTTCGAGGCAGCTGGGAGGCAGATCCTCACACTCTGCCCTCCTCTCCCCCAGGTACAAGATGGTGGTGACCCCCCGGAGGGCGGCGGTGGCCATAGCCGGCTGCTGGATCCTCTCCTTCGTGGTGGGACTGACCCCTATGTTTGGCTGGAACAATCTGAGTGCGGTGGAGCGGGCCTGGGCAGCCAACGGCAGCATGGGGGAGCCCGTGATCAAGTGCGAGTTCGAGAAGGTCATCAGCATGGAGTACATGGTCTACTTCAACTTCTTTGTGTGGGTGCTGCC…	0.602293	1657
ADORA2A	FALSE	FALSE	FALSE	TRUE	TGATTCATGGAGTTTGCCCCTTCCTAAGGGAAGGAGATCTTTATCTTTCTGGTTGGCTTGACCAGTCACGTTGGGAGAAGAGAGAGAGTGCCAGGAGACCCTGAGGGCAGCCGGTTCCTACTTTGGACTGAGAGAAGGGAGCCCCAGGCTGGAGCAGCATGAGGCCCAGCAAGAAGGGCTTGGGTTCTGAGGAAGCAGATGTTTCATGCTGTGAGGCCTTGCACCAGGTGGGGGCCACAGCACCAGCAGCATCTTTGCTGGGCAGGGCCCAGCCCTCCACTGCAGAAGCATCTGGAAGCACCACCTTGTCTCCACAGAGCAGCTTGGGCACAGCAGACTGGCCTGGCCCTGAGACTGGGGAGTGGCTCCAACAGCCTCCTGCCACCCACACACCACTCT…	0.555683	871
ADORA2B	FALSE	FALSE	FALSE	TRUE	TCTAGGCTCTCGCCTCTTCCAGGAGAAGATACAAATCCACAAGAAACAAAGAGGACACGGCTGGTTTTCATTGTGAAAGATAGCTACACCTCACAAGGAAATGGACTGCCTCTCTTGAGCACTTCCCTGGAGCTACCACGTATCTAGCTAATATGTATGTGTCAGTAGTAGGCTCCAAGGATTGACAAATATATTTATGATCTATTCAGCTGCTTTTACTGTGTGGATTATGCCAACAGCTTGAATGGATTCTAACAGACTCTTTTGTTTTTAAAAGTCTGCCTTGTTTATGGTGGAAAATTACTGAAACTATTTTACTGTGAAACAGTGTGAACTATTATAATGCAAATACTTTTTAACTTAGAGGCAATGGAAAAATAAAAGTTGACTGTACTAAAA…	0.371287	404
ADORA3	FALSE	FALSE	FALSE	TRUE	CAATTACTGCTGTGGACTCACTGACTCTCTTCATTCACACAGATACAAGAGGGTCACCACTCACAGAAGAATATGGCTGGCCCTGGGCCTTTGCTGGCTGGTGTCATTCCTGGTGGGATTGACCCCCATGTTTGGCTGGAACATGAAACTGACCTCAGAGTACCACAGAAATGTCACCTTCCTTTCATGCCAATTTGTTTCCGTCATGAGAATGGACTACATGGTATACTTCAGCTTCCTCACCTGGATTTTCATCCCCCTGGTTGTCATGTGCGCCATCTATCTTGACATCTTTTACATCATTCGGAACAAACTCAGTCTGAACTTATCTAACTCCAAAGAGACAGGTGCATTTTATGGACGGGAGTTCAAGACGGCTAAGTCCTTGTTTCTGGTTCT…	0.453956	771
ADPGK	FALSE	FALSE	FALSE	TRUE	GTGCCAACGGGGCCTGGGTCTCTGAGCCTCCGAGGTCGGCCTTGGAGGTCGGGCGGAGCCGCGCAGAAACAGGGCTTCTCAGAGGTCCCCGGGAGGCGCTGCTGTCCGCGCTGGCCCCTTGGCGAGAAGTGTCGGACGTCTGAGTGGAACCCGGTTCGTCACCGCTGCTCTTTCCACTCGGCTGGCCTCTGCGCCTTTCTCTCATCCCGAGTCAATGCATGTGTTGATGTGGTGCTCTCAGGGGTGAAGCTCTTGCAGGCACTTGGCCTTAGTCCTGGGAATGGGAAAGATCACAGCATTCTGCATTCAAGGAATGATCTGGAAGAAGCCTTCATTCACTTCATGGGGAAGGGAGCAGCTGCTGAGCGCTTCTTCAGTGATAAGGAAACTTTTCACGAC…	0.487905	2439
ADPRH	FALSE	FALSE	FALSE	TRUE	GGAGACGTGATGTTCACTTCTGATGGATTCTTCTTTTGTGTATTTCCTTTTCTGCTATTTCTTTTCAGTTTTTCCAAAGTCAAGAGTCTTAACCTTGTACTCAGGGAATTTTGAGATAACAAGTCCCTTGGGCACCTTAAGCTCAGTTTTTTCAGGCTCATCCTGTTCTTCCAGAATCTATCCCTTTTCTTACACTGAAGAGTCCTTTAGCTCAATTGATAGGGTCAGCGTCTCGCAAGCAAAAAATCTCATGACCTCATATTTGAGTCTTCATTTTCATCATCTACTTGTTCTAAAAGTTTTTTCTGTTTGTCTCAAGTTGGGTTCCCACAAAGTGGACTTTGAGACAAAGATCTGAATGCAAGCAGTTTATATGGGAGATGATTCCAGGAAATACCG…	0.441703	2067
ADPRHL1	FALSE	FALSE	FALSE	TRUE	GGCCCCGAGTACACACCGTGGCTCGCCCAGCACTGTGACATCCGCCCATTGAGGGACTTCAGGCATTTTCCTGCCTCCAAATGCGTCTTGGAGCATCCCCTACAGAGACGCCTGTTTCCATAATTTTCTTTCCCTTCTTCACAAGCTGACCTTGGGAGGATTGAGCTACATGTGGGTCGGGTTCCTGTCACCCCACAGAGCCACGAGGCCATGGGGGTGGGAGGTGCGGGCCTGTGGCCTCACCAGGCCCTCGGGATTCTTTGTGTCTTCACTCGGGGGCGCCGGCTCACCCCTCTCTCACACAGCCTGCAGCGTGGAGCTCACACCTCCCGCAGTGGCACGGTGTGTGCGTCCCCTTCGATCTGCAGGATGCTGGCACTTTGGGACACCTCCCCAGCT…	0.564225	3768
ADPRHL2	FALSE	FALSE	FALSE	TRUE	TGAGGGCTACAGCTGTTGGGGCTCTGCCAGGTCCCCTGGGACCAACTACAGCTCCAATCAGAAACCCTGCGCTTCCTTGAGTGTGGCTTCCCACTTTTCCTGCATTGTGGAGCTGACTGAGTACACCGGTGAGGCTGGGGTCTCTGCAGGGGAGGTCACTGGAACAGCGAGCAAGGGACTGGTGCCTCGCTGGTGCTGGGTCTCTGGTTTGCTGCAGAGCCGTAGGACACTCCTGGCTCCTCAGTAGGACAGACAGACGCAGGCGGGTTTATTTTGGAGGGGTACTTGTGGCATTTTCCTGTATTGTCTTGGACATGGGATGTGGGGAGGTGGAAATGATGAGCAGTAGCATCATTTCTCCCTGTTGGGTTTTAGCCAGTTTGCCAGCAAGCGCATCCT…	0.547619	546
ADPRM	FALSE	FALSE	FALSE	TRUE	GCTGAGAATCTAATAGATTGTCTTTAAATTCTTCAGCTACCTTTTATTCAGCAGGAAGATGGACAATTAAGGACTTTCTGAGCCCCAGTTTGTCCAGTTTAATGGAGGATTCAGCCAAGAACAGCTAAACTGGTTGAATGAAGTGCTAACATTCTCTGACACAAACCAAGAAAAGGTGGTGATTGTGAGCCATCTTCCCATTTACCCGGACGCCTCTGACAATGTGTGCCTGGCCTGGAACTACAGAGATGCCCTGGCAGTCATTTGGTCTCATGAGTGTGTGGTGTGTTTCTTTGCTGGTCACACCCATGATGGTGGCTACTCTGAGGATCCTTTTGGTGTATACCACGTCAACCTAGAAGGAGTTATTGAAACAGCTCCAGACAGCCAAGCCTTTGG…	0.414966	588
ADRA1A	FALSE	FALSE	FALSE	TRUE	AACCAGGGCAGGGATGAGTGTGCTATCCACAGCTGAGAAGTGAAACACCCATGTTTAATAGGGACTGACCCAGGAAAATCAGACGAAGTCTCGCTCTGTCACCAGGCTGGAGTGCAGTGGCATGATCTTGGCTCACTGCAACCTCCGCCTCCCGGGTTCAAGAGATTCTCCTGCCTCAGCCTCCCAAGCAGCTGGGACTACAGGGATGTGCCACCAGGCCGACGCCACCAGGCCCAGCTAATTTTTGTATTTTTAGTAGAGACGGGGTTTCACCATGTTGGCCAGGATGATCTCGATCTCTTGACCTCATGATCTGCCTGCCTCAGCCTCCCAAAGTGCTGGGATTACAGGCGTGAGCCACCGTGCCCGGCCCAACTATTTTTTTTTTTTATCTTTTTT…	0.515419	681
ADRA1B	TRUE	FALSE	FALSE	TRUE	GGCCCCCGTGCGCAGCTTTCTTTCCCTGGGGAGGAAAACATCGTGGGGGGGA	0.653846	52
ADRA1D	FALSE	FALSE	FALSE	TRUE	GGACCCCAGAGCTAGGCCGCGGAGTGTGCTGGGCTTGGGGGTAAGGGGGACCAGAGAGGCGGGCTGGTGTTCTAAGAGCCCCCGTGCAAATCGGAGACCCGGAAACTGATCAGGGCAGCTGCTCTGTGACATCCCTGAGGAACTGGGCAGAGCTTGAGGCTGGAGCCCTTGAAAGGTGAAAAGTAGTGGGGCCCCCTGCTGGACTCAGGTGCCCAGAACTCTTTTCTTAGAAGGGAGAGGCTGCGGGCTCCGTGGGGCCTTTTGCTCCCAATCCCTATTTGAGAAACACTGCCCCATCCTCCATGCCCTGAACCCTGAGTAGACAGCCCCAAGCATGGCCAGGAAGGCCTGCCCCTCCTCTTCTGGGAAATAGGCACAGAAGCTTTGGCCGGCTACCCC…	0.536996	892
ADRA2A	TRUE	FALSE	FALSE	TRUE	GGTTTCCGCTGGCGCCCGCGTAGACTCACGCTGACTGCAGGCAGCGGGGGGCATCGAGGGGTGCTTAGCCCCAGGGCACTCAGAAACCCGGGCGCTGCCTGCTCTGCGTTTCCTCGTCTGGGGTGGCTCTGCAGCCTCCTGCGGGCGGGCGTCTGCTGCTCCTACAAGGGAAGCTTCTTGCTGCCAGGCCCACACATCCCCAGTTGTTGGTTTGGCCACTCTTGACCTGGAGCCATCTTCCTAGTGGGCCACCCCTAATCACTATTGCTTCCTAAAGGTATTTTCACCCTCTTCGCCTGGTACAGCCCTCACAGCTCTTCAGAGCAAGCACTGGACTACAAGGGCATGGCTCACAAAAGGTTAATGGATGGGGGTTACCTAGCCCTGGCTAATTCCCCT…	0.466623	1513
ADRA2B	FALSE	FALSE	FALSE	TRUE	GCCCGCCTGCGCTGCCCCTGTGGGGTTGGTGCGGTGGCGCCGGGGTCACCCTGCTTCTTGCCCTGCTGTGTGTGGCTGCCTCCCCTGGGCTTTCTGCTCCCTGCCCAGATCCTGTAGGCCTCATCTTAGGAACCCCTTGGGAGGGGTGGGCAGGGGGGCTGCTAGCAAGGGTCCCAGTGAAGCTTCCCCTTGCCGGCTTAGCTGTGGGGGACCCCTTCTCCACCCTCTCCCTGAGCACAGGCCGATGGAGGTGGTTCAAATCCTCTGGAACATAGCCAAGACCAGGAGAAGAGAGAGCACTTTCTTCCCAGAGCCCCATGCTCTCCAGACCAATGTCTGGGCTTCCCTTTCTTGAGGACCTTGTGTTCCTGGCAGGTCACTTGCTTGTGGTGTTTTCGT…	0.563996	1922
ADRA2C	FALSE	FALSE	FALSE	TRUE	CTCGCACCCGTCTGGGAATCCTGGACAGCTCCGCGCTCGGGGCTGGGCAGAAGGGGCGGCCCGGACGGGGGAGCTTTCCCAGAGACCCGGGGATGGATTGGCCTCCAGGGCGCAGGGGAGGGTGCGGCAGGGCAGGAGCTTGGCAGAGAGATAGCCGGGCTCCAGGGAGTGGGGAGGAGAGAGGGGGAGACCCCTTTGCCTTCCCCCCTCAGCAAGGGGCTGCTTCTGGGGCTCCCTGCCTGGATCCAGCTCTGGGAGCCCTGCCGAGGTGTGGCTGTGAGGTCAGGGTTTTAGAGAGCAGTGGCAGAGGTAGCCCCCTAAATGGGCAAGCAAGGAGCCCCCCAAAGACACTACCACTCCCCATCCCCGTCTGACCAAGGGCTGACTTCTCCAGGACCT…	0.59887	531
ADRB1	FALSE	FALSE	FALSE	TRUE	GGCCCGGCGCGGGGCGCGGACTCCGGGCACGGCTTCCCAGGGGAACGAGGAGATCTGTGTTTACTTAAGACCGATAGCAGGTGAACTCGAAGCCCACAATCCTCGTCTGAATCATCCGAGGCAAAGAGAAAAGCCACGGACCGTTGCACAAAAAGGAAAGTTTGGGAAGGGATGGGAGAGTGGCTTGCTGATGTTCCTTGTTGTTTTTTTTTTCTTTTCTTTTCTTTCTTCTTCTTTTTTTTTTTTTTTTTTTTTTCTGTTTGTGGTCCGGCCTTCTTTTGTGTGTGCGTGTGATGCATCTTTAGATTTTTTTCCCCCACCAGGTGGTTTTTGACACTCTCTGAGAGGACCGGAGTGGAAGATGGGTGGGTTAGGGGAAGGGAGAAGCATTAGGAGGGG…	0.408346	1342
ADRB2	TRUE	FALSE	FALSE	TRUE	AGCAGTTTTTCTACTTTTAAAGACCCCCCCCCCCAACAGAACACTAAACAGACTATTTAACTTGAGGGTAATAAACTTAGAATAAAATTGTAAAATTGTATAGAGATATGCAGAAGGAAGGGCATCCTTCTGCCTTTTTTATTTTTTTAAGCTGTAAAAAGAGAGAAAACTTATTTGAGTGATTATTTGTTATTTGTACAGTTCAGTTCCTCTTTGCATGGAATTTGTAAGTTTATGTCTAAAGAGCTTTAGTCCTAGAGGACCTGAGTCTGCTATATTTTCATGACTTTTCCATGTATCTACCTCACTATTCAAGTATTAGGGGTAATATATTGCTGCTGGTAATTTGTATCTGAAGGAGATTTTCCTTCCTACACCCTTGGACTTGAGGATTTTGAG…	0.387622	614
ADRB3	FALSE	FALSE	FALSE	TRUE	GCCTGAAGGACAAGAAGCAACAACTCTGTTGATCAGAACCTGTGGAAAACCTCTGGCCTCTGTTCAGAATGAGTCCCATGGGATTCCCCGGCTGTGACACTCTACCCTCCAGAACCTGACGACTGGGCCATGTGACCCAAGGAGGGATCCTTACCAAGTGGGTTTTCACCATCCTCTTGCTCTCTGTCTGAGAGATGTTTTCTAAACCCCAGCCTTGAACTTCACTCCTCCCTCAGTGGTAGTGTCCAGGTGCCGTGGAGCAGCAGGCTGGCTTTGGTAGGGGCACCCATCACCCGGCTTGCCTGTGCAGTCAGTGAGTGCTTAGGGCAAAGAGAGCTCCCCTGGTTCCATTCCTTCTGCCACCCAAACCCTGATGAGACCTTAGTGTTCTCCAGGCTC…	0.499593	1227
ADRM1	FALSE	FALSE	FALSE	TRUE	GCCACGCGCCGTCCTCCGAGGAACTGGGCGCTTGCAGTGCGTTGCACACCCTCACCTCCCACCCACTGATTATTAATAAAGTCTTTTCTTTTACCTGCCAA	0.544554	101
ADSL	FALSE	FALSE	TRUE	FALSE	AGTTGGAAGAGAATTAAACGAAAATCATTGTTAATTGCTGAGGCATGAAAATTGTGTTACTATAATGCCTTATTTTACCTCGAGAATTGTTACCTTAAATTAGTACAGCACTTTCTTCTTCCCATGGTGCTTTCCTGTTTCTCAGTCTCACATTTCTCAACAAGGCAAAAACAAAGAGCGTTGAAGTTGACTCTGCTCTTGCATAGTAAATGTAGTTCATACTTGATCTCTGTTCTTTCAAGGCATATTTTCCAGCTGCCTCAAGTTTAGTCCTTTTCACGTGTTCATTTGCTTGTAAAGTAGCAAGAAATTTCTGGTCCTGTCTTCTAAAAGTGAATTTGATCTAGGTCTAGCAAAATAACCTGGACTCAGTGATTGAGTCAATGGTCAGATACCTTT…	0.42355	2845
ADSS	TRUE	FALSE	TRUE	FALSE	TGATTGCCAGTAATGCAAGAAACACTCCTTGAGAGGGAGGGGAAAAGACTTTCTTAAATATTTCATTTATGACCTGCAAATTCAAGAATAAAGACACTGAAGTAAGTTTGAAGCCCTACAGTTGTTTCCAGTCTTTTCAGATGGATGCCTACTGTGGAGATTAACTTTGGCATATTCCAGTGTCAGCTTTCTTTAGCTGGAATTGCCAAATCATTTGTTGCTCCTGCTGCTCTCATGGTGCCACGTTTTTTTTTTCAATGTTTAGTAATAGTATAATCCATGTTGTTTGATATCAAAAGTAGAATTACTTTTAATGTAGTTTTTCTTCATTATTGTCATTGCGTGTTCTTAAGTTTTACCCCTATTAGATGGTAAGAACAATTAATGCAGTTTTGCACA…	0.314103	1092
ADSSL1	FALSE	FALSE	FALSE	TRUE	TGAGTTTTCCTCCAGATTCAAGAACCTGGCCCACCAGCACCAGTCGATGTTCCCCACCCTGGAAATAGACATTGAAGGCCAACTCAAAAGGCTCAAGGGCTTTGCTGAGCGGATCAGACCCATGGTCCGAGATGGTGTTTACTTTATGTATGAGGCACTCCACGGCCCCCCCAAGAAGATCCTGGTGGAGGGTGCCAACGCCGCCCTCCTCGACATTGACTTCGGGACCTACCCCTTTGTGACTTCATCCAACTGCACCGTGGGCGGTGTGTGCACGGGCCTGGGCATCCCCCCGCAGAACATAGGTGACGTGTATGGCGTGGTGAAAGCCTATACCACACGTGTGGGCATCGGGGCCTTCCCCACCGAGCAGATCAACGAGATTGGAGGCCTGCTGCA…	0.52973	1110
ADTRP	FALSE	FALSE	FALSE	TRUE	TTGCACACCATTTTCCAAGAACCAAGAAAGAAGAAAACACAAGAGATTTTTCTCATCTTTTTTTTTTTTTTCTGGTGGAGGGAGGTGGTGGAGGAACATAGCAAAGTAGGAGGGACAGAGAGTGATACTTAAATTTAATAAGAGGTTCGTGAAGGTAGCTTAACTTGAGAACTCTTGGTTTTTTGAAAGGTTGACTGCACATGCCAAAAACAACTCCTGCTATCTCAGAATTAATTATCTTTGACCTTCGTGGAGGATGGTCTCTGGTTAAAATCTGGCCAAAGAAACTCACATAAACTTGGTGTTAGAGAACATCTAGAGAGAGAGAGAGGAACTTAGAGTCATTTAAACTCTTCAGTTTACAGAGAAGGATGCTGAGGACCTAGATGAGAAGTTACC…	0.371069	954
AEBP1	FALSE	FALSE	FALSE	TRUE	TGTGCAGAGCTCACTGCCTCCCGCCTGTTCCGGAGCCTCTCTGGGGATTCTGGCTTGTCTTACAGGGCCCTAGGAGCCCCAGCTGTCCCCCAGACCCTCGGGGGAGCCCGAGTTCCGCTACACTGCTGGGATCCATGGCAACGAGGTGCTGGGCCGAGAGCTGTTGCTGCTGCTCATGCAGTACCTGTGCCGAGAGTACCGCGATGGGAACCCACGTGTGCGCAGCCTGGTGCAGGACACACGCATCCACCTGGTGCCCTCACTGAACCCTGATGGCTACGAGGTGGCAGCGCAGATGATTTCCCGGATCTCAACTCTGTGCTCTGGGGAGCTGAGGAGAGGAAATGGGTCCCCTACCGGGTCCCCAACAATAACTTGCCCATCCCTGAACGCTACCTT…	0.612069	1972
AEBP2	FALSE	FALSE	TRUE	FALSE	ACGACGTTTGCAATCAACTAAAAATTCGTCTATCGAATTAGGGCTGAAAATTACTGTTAAAGAGTGTTGCAGTATGTCTGGTGGCTCCCTTTTCAGGACTAGGGCTTTCTCATGGAGTACAGTATGTTAATATTTACCTATATAACTAATCTGTTAACGGTTTTTGAAAAACCTTTCAAATTATTTGAATAATCTTCATATTTTCATTTAACCTATATGACTCTAATTTTTTTTCTGAGGAAATCATTTGGTTTTTGAGTTGTTTTTTCTTAATGTAAGAAAAATTGTATTTTTTTTACAAGTATCTTCAAACTGAATCTTTTATGCACCAAAGTTGGTCTTGAAAAGGAAAATAAAATCACTTTCTTGCTTGGTAAGCAAGAAGCCATATCGATTTTT…	0.300369	3519
AEN	FALSE	FALSE	FALSE	TRUE	GAAGGGGGCGGGGCTCCCTGGCTGGGCTTCCGGTGTGGCCGGTAGGAAGTGGGGGCCAGGAGAGCAGCGGGCACTCCTTCCTGGGCAGGGTGGGGCAGGATGCAGTGAGCCAGCCCCAGGGCCAGAGGAGTAGGGGTCATCTGTTACCTTGACACCCTCTGCACACAGCATAGCCCTCTCTCTCTCCAGGGCTGTTGGTTCTTTCTTCTGACTCCTGTGGTTTTGCTAATGGCACTTTACAGACTCCATGGAGATGTCAGGTGGACCATCTTCTAGGGCCCAGCAGGAGTAGGGAATGTGCCAACAGACTGCCCAGGTTGCCGTGGCCTTCCCCACCCCCCAGATCTCCTGAGTCATCATGCTGTGCTAATGAAAGGGATCATATCATCCTCTCTGGGG…	0.521127	1988
AES	FALSE	FALSE	FALSE	TRUE	CAGGGGGCCGGGACAGGGAGGTTGGGAGGGGGGACAGAGGGGAGACAGAGGCACGGAGAGAAAGGAATGTTTAGCACAAGACACAGCGGAGCTCGGGATTGGCTAAACTCCCATAGTATTTATGGTGGCCGCCGGCGGGGGCCCCAGCCCAGCTTGCAGGCCACCTCTAGCTTTCTTCCTACCCCATTCCCGGCTTCCCTCCTCCTCCCCTGCAGCCTGGTTAGGTGGATACCTGCCCTGACATGTGAGGCAAGCTAAGGCCTGGAGGGTCAGATGGGAGACCAGGTCCCAAGGGAGCAAGACCTCGCGAAGCGCAGCAGCCCCGGCCCTTCCCCCGTTTTGAACATGTGTAACCGACAGTCTGCCTGGGCCACAGCCCTCTCACCCTGGTACTGCATG…	0.548955	909
AFAP1L1	FALSE	FALSE	FALSE	TRUE	GAAGAGGATGAGGATTTCATTCCAAAGGAAATACCAGCTTGTCCACCTGAGGAAGAAATGCTTTTTTCACAAGGAGACACCAAGAGAAGACTAGGAAGTAGCCCTCGTTCTCCAGGGCACCCAAAATACCAGCCTTTATTGTCTGCATGATTTTAGGGGATATGGGGAGGGAACAAGTAGAAGGGAAGAGGGAAATGGAGAGCATCCTTATGACTTTACAAAGGGTGGAAATGAGGATGGAGGGATACAGAAGTCTGCACAGCTGTAAAGGTTTTATAGATGTCTTTGCCTTCCCTTCTGAGGAAGGGAAGAAGTAATGAAAGCACATGTGAATAACCCCTTCCATCCCATTCACAGCATCGCACTCCCAGTCCTTAAGGCAAAGGGAGGCAGTGCTGA…	0.433973	1772
AFAP1L2	FALSE	FALSE	FALSE	TRUE	AAAACAAGCTTCATCTAAAGACTCTCATGTCAATGTGGACCTTGGTGACAATCCTGCTTTGTTAAAGCAAAAACTATGCGAAAGGGTGAGTCTGTTTAGAAGAAAAAGCAAAGACTGAGGTACTGTGAATGGAGAGCTTCAGCTAAGAGGAGGCTCTGTCCCTTTTCAGAGCCAAAGGAAATAATACAACAAAAAGGAGGCTTCTTTGGAGACCTAAGTCTATTGGATGTAAACAAGACGTTGTATTTAGGGATGTTCTGTGTTTCTTTCTTTTTTGAAGTTGTCATCAATTGCTTTACTAAGATTTTTAAATAGTGAAAACCTCCTGTTTAGACTTTGGTGGAAGATGAATCAAGGAAGCAGGGCCCTGTCTTATGGGTCACGTGTCTTTGGTGAGTG…	0.363711	1218
AFF1	FALSE	FALSE	FALSE	TRUE	TGGAGCCCCAGGTTGATTCAATGCCTTGGGAACTATTTTTGCACATTGGAAGCCTCAAAAACAGTCCAGACATTTGTTTCATCAGGACACCAAACTCTAAAAAAGAAGCACCACGAGATGGCCAGGACATTTGTCCACTTAAACTCTCAACAACAGTGTGATCATTGGTTGGACACTGTGGTTATGCAGAAGCAGAGATGAGGAGGCTGGCCCCAGAGATGATCTTGCCCTTCCTAACTAAAGGACAGAAGTGCAATTTAGCTTAAATGGGTGTATGAATGGTCTAGAAACATTTCTATTTTTTTTTTAAACCAGCAGGATACAAGTTGCAAATGAAATGAGGAGAAACAGTTTCAACTCTGAAAGTGAATTTCACGTCATCTCAGTAGCCACGCTAGT…	0.383523	5353
AFF2	FALSE	FALSE	FALSE	TRUE	TGGGTGTTCTCAGATCTCTAGCATCACGACCCATCACTCTACCTCTACCAGCGCACTGATGGTCACTGGTGGAACTCCACTCACTGGGGAACGTTCTCTTTGGTTATGTTTGTTTTTATGCTTCTTTTGTTATCTGTAAAAAACAGAAGTCATTGTAAGTTGACACTACAACTTAAGGGCAGTGTACGTTTTATTACTTAGTCATTTTTTTTCTTTTAGCATTTGATATGCATTTCTCAGATTCCACCATCTTTTTGTGCTTTATGGAATGACAGTCCCTACAATATTGTTTTAAGCCCACACTACCCAAAACAAAGAATGGGAAGCACTTGTGATAAAGACAGGCTCCTGAGAAATGCAACAAGTGGTCTTACATATACATGAGAACTTAGACACAAG…	0.392348	9331
AFF4	TRUE	FALSE	TRUE	FALSE	ACTGAACACATTCTCGTTGCCTCTGATTTTCTCCACAACACTGTGTCACATCACGAAGGAAAACTGCCATAACATACCACCTAGTCGACACTAAGAATGAGGAATAGTTTTCTCCTCGTTGGTTCATGTGTTGTTGTTTTTGATAATCCAAAGCGATCATGTCAGTTGGCCCTTTAATATTTCCAATGTGAAAGATTATTTAAATGCTTTTAAATCTGCAGCACATTGATAAGATGGTTTCCGTGAGCTATGATAAGATTGAAATTCCAGTTGCAATTCATAACTAATGAATTGAAATTTTATTTATTTTAATTTTTTTAAGTTCCCAGATTGGGGCTAGTTTAAGACTTAGTTATTTCTGCCTATAAATTTACTCTGTTGAATATTTAGCATAAATTT…	0.357218	5680
AFG3L2	FALSE	FALSE	TRUE	FALSE	AGGCCCAGAGGGAGGCCATCTCAGTCTGTCCACTGTGGTTTCAGCTGGTGCATTATTTCAGCTGTGGCTTTCAGAAGAATGGGAATGCTGCGCTGATTTTAGCCAGCCACTGGCCCAGCTGAAATGATGGGGAAAGGAGTCCTTAGTCCTTTCAGCCTCAGAGGTCACAGTGGGTGGCAGGTGACTTTCCGGAGGCCTTGAGGGAAATGCACACTGTCCCATAGCCTCATTGGGCTCCCAGACGTGCTGGAAAGGTTGAGCCCAGAGTGGCCGAGGCTGGACCCTGTGGCACCAAGTGGGGTCGGCTGACCGTGTGGCAGGGATCGTTGCACTGGACTCTTGGCGTGTGGGAAGGGATGCTTTCTCTTTGTCGCCCACTCTTCATTCCTGTTTCTCCTC…	0.47182	621
AFM	FALSE	FALSE	FALSE	TRUE	AGCCAGCTGCTGGAGATATGTAAAGAAAAAAGCACCAAAGGGAAGGCTTCCTATCTGTGTGGTGATGAATCGCATTTCCTGAGAACAAAATAAAAGGATTTTTCTGTAACTGTCACCTGAAATAATACATTGCAGCAAGCAATAAACACAACATTTTGTAAAGTTA	0.36747	166
AFMID	FALSE	TRUE	FALSE	TRUE	TTCTGACGATACTTGGAGCCTGGTCCACGTGCATCCCACCTTGGGAAGCCTCTCCAAAGAGCTTTCGGAGCTGACACTGACAGCTTCAGTTTCCCCCAGCACCCAGGAGAGCCTTGCTGTGTCTGTCTGCCCGGCAAGAGTCCATTCTCACTGCTGGGACACTCATGAAAATCTCCACGTCCTCCCTCTTCCCAGCCTGGATGGAGCTCCAGGGCTGGGGAACGTCCGCAAGTCAATGCTCAGAGATGCCCGGAGCTGCCTCTTAGACTCGTCTGGCCCATCTACCTGCTGACAGAGCATGACAAAGATGACGCTCAAAAGTAATGCCATTACTTCTTTTTTTTTTTTTTTTTTTTTTTTTTTTGAGATGGAGTCTTACTCTGTCACCCAGGCTGGAGT…	0.48822	764
AFP	FALSE	FALSE	FALSE	TRUE	ATTACTTCAGGGGAAGAGAAGACAAAACGAGTCTTTCATTCGGTGTGAACTTTTCTCTTTAATTTTAACTGATTTAACACTTTTTGTGAATTAATGAAATGATAAAGACTTTTATGTGAGATTTCCTTATCACAGAAATAAAATATCTCCAAATGTTTCCTTTTCCAAGTTTGCTTATTTATGAAAAGTTATCGATAATTTCTTTAGTTTTGTATACCATTGTCTGAAGCAGATTCTGTTAAAATAGCATTAAGTGTTGGTTATTATAGGAGATTAAAGCTATCCAAGGATGGATTTACAGCACTAGATCACTTGGTGAACTGAAAAATGTTCCCAAGTTAAACACTATTTGATGCTACCAGGGCATTTTGTTTATTAAATGACCATCACTGAAGTATT…	0.288809	554
AFTPH	FALSE	FALSE	FALSE	TRUE	TGTTCCCAGCCACGTTAACACCTTCCACAAGCTCTCAAGAAAAAGCAGACGGATAACTGATGTGAATTGGACAGTTTCTATTGCTTTTCCTTTTTTCCATCCCTTCCCTACCATCAAAAGCATACCTGCTCTAATTAAAAAAAAAAAAAAAAAAAATTCAAGTTCAGCTGATTTGTTGGTAAGCCGCACTAGAAAGGTATACATAGTAATGTATATTTATTTACATACTGAAGTCCTAAATTTATATTAGAAAAATGTAAATAATCGGGGGTAAACATTTTTGAAGATTTATTCTTTTTGTGTTGCTGGGGTGTATACATTTATGTCTTTGTGAAATACACTGGTGGTGTCCTTCTTACAAAACTTTTGAAATAAAAAAAAAACTCAAATCTTCACTGT…	0.320626	1023
AGA	FALSE	FALSE	FALSE	TRUE	TCCATCTTTACTGTCAACATCTGTATTTAAAGAAGAAAGAAACAAAGGCTGAAAAGGCTGCTCACTCTCATCATCTAGTGTTCCTCATGTGTTCTAAAGTCTTTTTGTAAAATAAACACAAAAATAAATTTATGTTGAATTGGCACTTTCTATATCTGAAATTGTATTATCTATTTTTATTTAACCTTTCTTATATTATCTGAAGATGAATATGTATGTGGCTGTATTTTGTATATATTTAAGTTTTAAGTGACACTTGGATTTCTGATCAGTGTTGCAAAAAATTGCTACTTTGAGATTTATTTCCACAGTGATATATTAAACCCAAAAGGAATCATCATATTTGGATGCTTAAAATAGAGTATACAAGTTTTTTAGACCCAAAGAAAAAAACAGCAG…	0.317697	938
AGAP1	FALSE	FALSE	FALSE	TRUE	GGAACAGCCGTGCCCGCCTGCTCGCCGCACCTGGGACGCGGCAGCCTCGCCGCATTCTCGCTCAGAAGTCGCAGCACGTGAGTCCCGTCGCATCCCCTCCCTCTTCCTGGTGGCCACCTCCCTCCCGCCCACCCACTCTCACCCCAAACAAAATCACAAAACCTGGACATCCCTCAAGGGGCGAAGAGGCGGCCGGGAGACTGCAGAAGTGGCTCCTTTTCATAAACTCCCCTAAACCACACACAGGAGAGAGCGACGGGCCTCGGCCCTTTGATGATAGCACATGGCGCAGGACCCTTGTCCTGGTGGCACAAGGGATGGGGACGCGAGGGGGAGGGGAGGCGAGGAACAAGGAGAAGGGGCAACTTTCCTTAACTGGCAGTTGAGCACATAGTACAT…	0.503647	7678
AGAP2	FALSE	FALSE	FALSE	TRUE	TTGCCCAGCGGGAGAGACACCCCCATCCCCACGCGGGCCGGGCACGACCACACCGGGCGGACCGCTGGACAGACGCACCCACTCACCTCTCCGATCCGCACCCCGCCCCACGGGAGCACTTCCTACCCCCACGAGGGCACAGCCCCCACGCCTTCCAGAAGACACAAACTCACCTCCCTCTCCCCAACGAGGCATGGAGACCCCAGCTCAACACGCCCCCTCTCCATTGTTTCCACACTCGGATTGCTCTGGGTCTACCCGCTCGGGGTTCGCGGAAGGGGAGGTCCCCAGCGGTACGGGCTCCTAGGCGCTTGGACATGCCCGCTTGTGCCCCCTAGGGGCGGAAAGAAGACCCGGTCCTGCCCGAGCTCAACAATCCCAGGGCGGGAGCCCATACCC…	0.587603	2791
AGAP3	FALSE	FALSE	FALSE	TRUE	AAGACCAGTTGGTGACACACAGCACCTCTGGACATGCCCCCTGTGCGGGGCCGGAGGCGGGCCGGGCCCTGGGACTGCTCTCAGATGAGAAGCGGCCGCCGAGCTCCCCACTCCAGAGACCCACGGGAACCTTTGTAACTAACCCCACCCCCAGGGAAGGCTAGGAGCGCCGGAGCCCGCGCTGGGGGCTGCCGGGGACCAGGCCCGGCCGGACGCTGCAGGCTCGCTGCATGGAGAAGAAGGCAGCTCGGCCCCACGCCCGGCGCTGGCCAGCGCGACGAGGCCCAGAGGGGCGGGGGAGTCCAAGCCCGCCCGGCCCGGCTGCTCCTGGGGGGCGCTTTCCTGCCCCTCCCCTCCTCTGCTCCTTCCTGCATGGACCTCTGCCGTTCCTGCTCCTGC…	0.688602	851
AGAP4	FALSE	FALSE	FALSE	TRUE	TATCTGTTTTATTTGACTGCAGTCTCCTTGGTGCAAAAACAAAATGGGAAAAATAAGGATAACTCAGAATTTCAAAAGGAAATCACAAATTCAGCTAATAATAGCATTTTCAGTACTTTTCGTAAACTAAGTAAATACACAAAATGTTGATTTTTCTGACCATAAGACGTATTTTATGTCCTTTTGCCAAGGTGGATTTGTTAGTCTCAGGCCCTCCTGGCCACATTGCCCAAGTCACACAGGCTTCTGTATTATGTATTTAGATAAAATGTGTGAAAATATATTTGAAATAAAGTTCATAAATATGCATTGATTTTTGTA	0.317757	321
AGAP6	FALSE	FALSE	FALSE	TRUE	TATCTGTTTTATTTGACTGCAGTCTCCTTGGTGCAAAAACAAAATGGGAAAAATAAGGATAACTCAGAATTTCAAAAGGAAATCACAAATTCAGCTAATATTAGCATTTTCAGTACTTTTCGTAAACTAAGTAAATACACAAAATGTTGATTTTTCTGACCATAAGACGTATTTTATGTCCTTCTGCCAAGGTGGATTTGTTAGTCTCAGGCCCTCCTGGCCACATTGCCCAAGTCACACAGGCTTCTGTATTATGTATTTAGATAAAATGTGTGAAAACATATTTGAAATAAAGTTCATAAATATGCATTGA	0.329073	313
AGAP9	FALSE	FALSE	FALSE	TRUE	CCTACGCCCGGCAGGCCTCCAGCCAGGAGTGCATCAACGTGCTTCTGCAGTACGGCTGCCCCGACGAGTGCGTGTAGTATCTGTTTTATTTGACTGCAGTCTCCTTGGTGCAAAAACAAAATGGGAAAAATAAGGATAACTCAGAATTTCAAAAGGAAATCACAAATTCAGCTAGTAATAGCATTTTCAGTACTTTTCGTAAACTAAGTAAATACACAAAATGTTGATTTTTCTGACCATAAGACATATTTTATGTCCTTTTGCCAAGGTGGATGTGTTAGTCTCAGGCCCTCCTGGC	0.426174	298
AGBL3	FALSE	FALSE	FALSE	TRUE	CACAAAAGCAGTATAATAAAAGGTAATGAATAATAACTGGAAAATTCAATGCCACAGGAATATAGTTGGAAGAAAGAATGTACTAATTTTATAAGCTCCCACTTATAGTAGCCGAGGCTCTGACAGTTCAGAATCCATTGACTCTCTGACTTACCTTCTCAAGTTAACTTCTCAGAAAAAACATTTGAAAACAAAGAAGGAAAGGAATTCTACCATAGCAAGCCACCAAAATGCCAGAGGACAAGAGGTTTATGATAGAGGGCATTTGCTGCAAAGACACACACAATCAAATTCTGATGTGAAAGATACAAGGCCAAATGAACCAGATGATTATATGGTTGATTATTTCAGAAGACAATTACCTAATCAAGGTTTGGATCTGCACCACAACTTAAAAAG…	0.335624	873
AGBL4	FALSE	FALSE	FALSE	TRUE	GGGCTGAGACTCTCAGGTGAGGATGGAGGTGCTTCTTCTTCTGGTGGCGTCTTTGGATTGTCCAGTTTGCCTCAGCCCTTAGTATGATACTCCTACCCCAATTGCCATGCTCCAAATCTTTCCCAGGCCAGCCGGACCCATGGCCTGCCCATATCTTACTCTGCTTCCATCTCTCTCCCCTCTCTTCTCTCATGATGCAGTGAGTCTCCTGCCATCTAAGCTATGCAAGTCCACAGGCTGGATGACCATCCCCAGGGTTGCTGAGGAAGAGCTTGATGATCTTGACTCCTTCTAACCCTGAACATACAAAAACATATGTTCTCTTTTCATCTTTTGTCTAACCTATCCTCTCCCACTTTCTCTTCCCTCTACTCACTATTTCCCCTTCTACTTACTTTT…	0.460678	3039
AGBL5	FALSE	FALSE	FALSE	TRUE	AAGGCTCTTCAGGCCCCACATCCCCTACCCCCCGGACCAGGGAGAGCAGTGAGCTGGAGCTGGGATCCTGCTCTGCTACACCAGGGCTGCCTCAGGCCAGGCCCCCACGGCCCCGCTCTGCCCCTGCCTTTTCTCCTATATCCTGTAGTCTATCTGACTCCCCATCCTGGAATTGTTACAGCAGGGGTCCCTTGGGCCAACCTGAGGTTTGTTTTGTCCCTAAATCTCCCCCACTGACTGTTTCTCCCCGGGTCTGATAATGCCTTTATGTTCAAGCCCAGGATATAGCCCCAAGATGGGGTAACAGTGGGAAATATGCTAGTTCCCCTCCAGGCCGCTGATTCCATGTGACAGCCGTTAAGTCCTTGGAATGCCAGCCACGCTGTCCAAGGCATTACA…	0.525974	616
AGER	FALSE	FALSE	FALSE	TRUE	CTGGGGGGATGGTCAACAAGAAAGGAATGGAAGGCCCCAGAAAACCAGGAGGAAGAGGAGGAGCGTGCAGAACTGAATCAGTCGGAGGAACCTGAGGCAGGCGAGAGTAGTACTGGAGGGCCTTGAGGGGCCCACAGACAGATCCCATCCATCAGCTCCCTTTTCTTTTTCCCTTGAACTGTTCTGGCCTCAGACCAACTCTCTCCTGTATAATCTCTCTCCTGTATAACCCCACCTTGCCAAGCTTTCTTCTACAACCAGAGCCCCCCACAATGATGATTAAACACCTGACACATCTTGC	0.521595	301
AGFG1	FALSE	FALSE	FALSE	TRUE	CCTTATATAGACAATTTACTGGAACGAACTTTTATGTGGTCACATTACATCTCTCCACCTCTTGCACTGTTGTCTTGTTTCACTGATCTTAGCTTTAAACACAAGAGAAGTCTTTAAAAAGCCTGCATTGTGTATTAAACACCAGGTAATATGTGCAAAACCGAGGGCTCCAGTAACACCTTCTAACCTGTGAATTGGCAGAAAAGGGTAGCGGTATCATGTATATTAAAATTGGCTAATATTAAGTTATTGCAGATACCACATTCATTATGCTGCAGTACTGTACATATTTTTCTTAGAAATTAGCTATTTGTGCATATCAGTATTTGTAACTTTAACACATTGTTATGTGAGAAATGTTACTGGGGAAATAGATCAGCCACTTTTAAGGTGCTGTCA…	0.331746	6719
AGFG2	FALSE	FALSE	FALSE	TRUE	CACTGTGTTTTTGGGGGGCCTCTTCCCTGCCTTCTGGGGCCCCTCTGCTCCCTAGAGCTCTGGTGACCACTTGCCTGTGGGCATTTCTATGGGCCTTGGGGATGGTGGAGGTGCTAATGCTTTGCTTGGGGCCTACAGGTGAAAGGTGGCTGCCCTCAGATTCCACAAAGCCTCTCTCCCCTCCCTCGTCCCACCCCCACCCAGGCAGGAAGCCCAGGAGGAGTGCGGGCAGGGCCTGACCTGGAGGAGTGATGGTTGAGGGGGAGGGATTTTTTTCAAATGATCAGTCCCCTGTGGAACAGCTCTTCCCTGGGCCTAGCTCGCCAGCGCTGTGCTCCTCATGGACGGGAGCGCAGTGGGGAAGGTAGGGGAAAGATGAGGCACAGTGTTGATGGGGCA…	0.565985	3228
AGGF1	FALSE	TRUE	FALSE	TRUE	AGGCTAATCATAGAAAAAAAACCTCTAGTTTTTTTAAAAATAGAATTTGGAAACTTATTTTTTCTCCCCAAAAGAATCAGCAGCACAGGGGAACTATGTCACAGTTTACCTCTTCCTGATTCAGAAATGTGTATGGTTTGCAGCTTTTAAAAACCATTTTTTTAAAACTAATAAATAGTGACTGAACCAATTTATGCAGTAAATAGACTAAAGTTCACAGGGCACGGATGAGTTTATCAAACTTCGTTATTTTATCTTGTCATTTACAACATCCATATAAGCAACTAGCCATATAAGCAAAATTCATAGAACTACTAATGACTTAAGTGTACATCTGTTCTTGTCTCCATATATTCATGTAAGATGCACAACAAAAGAAACATCAGAAGTTTATAAAAA…	0.332997	1982
AGK	FALSE	FALSE	FALSE	TRUE	GCAGCAGAAGACAAGCACTCTGAGACCACACTTTAGGCCACCGGTGGGACCAAAAGGGAACAGGTGCCTCAGCCATCCCAACAGTGTCGTCAGAGGGTCCCCAGGGCATTTTCATGGCAAGTACCCCTCTGCCCCCACTCCAGCAGTGCTTCCCAAAGTGTGCTCTGTCACCTGCTTTGCAATCGGCTTCCATTAGCGCATGTTTTATTTTGGTGTGACGGTTGGCCCTCCTAAACACGGACTTTCCTCAGGCTGGTTCAAGACGGAAAAGGACTTTCTTCTGTTTTCTTCCAAAGTGCAACCACAGTGGAGAGCCCACGGTGGGCTTAGCCTGCCTAGGCCCTTCCATTTCTCTTCTTTGACCGTGCTAGGAATTCCAGGAAAGTGCATTCCTGCCCT…	0.394828	2320
AGL	FALSE	FALSE	FALSE	TRUE	GCATTAATTTATTTATTGGGTATGAGCTACAGTTCCGATTAGGCCCAACTTTACAGGGAAAAGCAGTTACCGTGTATACAAATTACCCATTTCCTGGAGAAACATTTAATAGAGAAAAATTCCGTTCTCTGGATTGGGAAAATCCAACAGAAAGAGAAGATGATTCTGATAAATACTGTAAACTTAATCTGCAACAATCTGGTTCATTTCAGTATTATTTCCTTCAAGGAAATGAGAAAAGTGGTGGAGGTTACATAGTTGTGGACCCCATTTTACGTGTTGGTGCTGATAATCATGTGCTACCCTTGGACTGTGTTACTCTTCAGACATTTTTAGCTAAGTGTTTGGGACCTTTTGATGAATGGGAAAGCAGACTTAGGGTTGCAAAAGAATCAGGCT…	0.36153	6904
AGMAT	FALSE	FALSE	FALSE	TRUE	GTCTTGTGCTCTTCAAGACAAAACAGATTGCGTCGCTGACAAGTTCTCAAGAAGAACTTATGAGTAAGCAGTCTGAGAACTAAAGAGTTTATGCCAAGAAAACTTTCTGCTGAAAGTGTCATTGCTGGCTGTGAAGTCGGGATAATCAGTAGAATTCTCACCCAAACAGCAACATTTCTAAGGAACTTGGATTAATTGGGGGAAAAAAAAAGGAGTACTTGTACTGCTTTGATTTTTTTTCCTTTGATGAAAGATGGAGGATAAAGGGGAAGTGAGGAGAATTTCTTTCAAGATTATCTAAACATTAGAAACATGACATTTAAAAAAACTATGAAATAATACTGTATAAGCATTCCATATTTCTATATCTTCCTTTTAAACATTTTTTTTTTTGAGATA…	0.448382	1298
AGMO	FALSE	FALSE	FALSE	TRUE	CCTGAATTTGTACATAATTCTCTTCTTTTAATGAGTTGTCCACACGCATATTATGACTGCATATTAAAATGTAATTATTTTATGTAATGCTTATATGAACTATTTCTTCAATGAAAAGTAAAATTACTTATTTACTATTGTTTGCCTTTCACATTTGTTATTTTCTATTAAAAATTAAAGTCAGTTTTGGTTACTTCCCCCCTTTACTACAATTAAAAAAAGATTTCAAATATAATGATGTTATATTAACTGATAGCCTTATATGACAAGTATAAAAAGAAGGGATGAAACTTAAAAACAGTAAAAACAAGAAGGAATATTGCCTTTACATCAATTTGAAAACAATGTTTCCTTTGATGTTTGCTAAAATTATGCATAGATACATGTTTGTAGTCATAA…	0.366081	967
AGO1	FALSE	FALSE	FALSE	TRUE	AGGCAGAACGCTGTTACCTCACTGGATAGAAGAAAGCTTTCCAAGCCCCAGGAGCTGTGCCACCCAAATCCAGAGGAAGCAAGGAGGAGGGAGGTGGGGTAGGGAGGAGTGTAGGATGCCTTGTTTCCTTCTATAGAGGTGGTGTAAGAGTGGGGAACAGGGCCAGCAAGACAGACCACCAGCCAGAAATCTCTGATATCAACCTCATGTCCCCCACCCCTCACCCCATCTTGTCACATCTGGCCCTGACCCCACTGGACCAAAAGGGGCAGCACTGGTGCCCACCATACACACAGGTGTCTCATGTGACTCACAGTGCTAAAGACTCATGCTTGACAGCTTGGTAAGGTCAACTCTGTAGCCCTGCAGACAAAAGCTGGTTAGGTTTGGGTTTGATAC…	0.438696	10921
AGO2	FALSE	FALSE	FALSE	TRUE	CATGTTTTAGTGTTTAGCGATTGTGTACCGAGTGGGATTCACGAGACCAGCTACACTCAGACCAACAGATGGCCAGCCCTTCCGTGACAGCCAGCATCGAACATGAGACGTCATTGATTTTATTAGATTCTCCGTTTTCCAGAATGCCTTCCGTCCCAGATTTCAAACTTGGATTTTGAACTGCAGACCTGTATGAGAACCCAATGTCATAGGAAATATGGTTTGCTAAAATCTATAAGCTGCTTATTAAAACAGAGTCCCGTGTGTCCTAAAAATCTCCTAAAACCAGTCTATGAACTCAGGGCTTTAAAACATTTTTAATTTATTTGGTCATTCAATTTACTTGTTTTTAATACATGATTCTCTATGAAATTGATGGGCTCAAACTAGCTGTGAATC…	0.440276	11888
AGO3	FALSE	FALSE	FALSE	TRUE	ATAGTCCAAGTATATTCTCTGAGAGGAAGTACTGAAAGATGAATTGACATACAACGTATGTTTCCAGTGAAGTCAATTGAGTAAGGACACCTCCAGCCATACAGAAACCAACACTGTGTGGGGGCCAAGGTCTGATCCTTATGTTAATACAAGGAAGATTGTTTACTTCATCAAGGAACACAGCATCATTATGCAATATGAAACCAGCCAACTGCTTTTTGTGCGGTCTCCTATAGGAAGTATCGCAATTGTTTTGTTTTCATTTCTTGTAGTCTAACCCTTTTAATGCCTTTACCTCAAGTTGCTTGGCAGCACAACTATCTTTGCAAAAAAAAGTAAAGAAAAAGTAAATGATGGTTTAAAAAATACACACCTTCATGAATAATCAAAGTGATTTTT…	0.371829	16755
AGO4	TRUE	FALSE	FALSE	TRUE	GAGTCTCAGAAAAAGAACTCAACCAATTTGGCACCCCATGCAGCCTCAAAATGTTTCAAATGCCTACCGCCTCTAGATCGAGCCACGTTGACTTCAGGTGGTCTTCTACCAGCAGCTCGGAATAGTTGCACTGAATCTATACTTTGCAGCACTGTCTGATGCGTCAACAAAATTGAGCCATTTTTTTAAAGTAATAGATACTAATAGATTATCTTTTCTGATGCACTGGACTGAATTTTTACCTCAATGTGCAAAGGCTGATCAGCCTGAACTTTCTAAAGGACTTTACAAGAAGGGTTTCTATGGAATATTTTGCTAGCTGTGGTGTTCACCGCATCCCTCTAGTCTTAGAAGAGAAGATTATTCCTTTTTTCTGTAGTCATTGAGTGGGGTATATGC…	0.4	4285
AGPAT1	FALSE	FALSE	FALSE	TRUE	ACCCTGGCTCTGAGCTCTCCTCCCATCTGTCCCCATCTTCCTCCCCACACCTACCCACCCAGTGGGCCCTGAAGCAGGGCCAAACCCTCTTCCTTGTCTCCCCTCTCCCCACTTATTCTCCTCTTTGGAATCTTCAACTTCTGAAGTGAATGTGGATACAGCGCCACTCCTGCCCCCTCTTGGCCCCATCCATGGACTCTTGCCTCGGTGCAGTCTCCACTCTTGACCCCCACCTCCTACTGTCTTGTCTGTGGGACAGTTGCCTCCCCCTCATCTCCAGTGACTCAGCCTACACAAGGGAGGGGAACATTCCATCCCCAGTGGAGTCTCTTCCTATGTGGTCTTCTCTACCCCTCTACCCCACATTGGCCAGTGGACTCATCCATTCTTTGGAACAAA…	0.542293	1064
AGPAT2	FALSE	FALSE	FALSE	TRUE	CCCAGACCACGGCAGGGCATGACCTGGGGAGGGCAGGTGGAAGCCGATGGCTGGAGGATGGGCAGAGGGGACTCCTCCCGGCTTCCAAATACCACTCTGTCCGGCTCCCCCAGCTCTCACTCAGCCCGGGAAGCAGGAAGCCCCTTCTGTCACTGGCCTCAGACACAGGCCCCTGGTGTCCCCTGCAGGGGGCTCAGCTGGACCCTCCCCGGGCTCGAGGGCAGGGACTCGCGCCCACGGCACCTCTGGGAGCTGGGATGATAAAGATGAGGCTTGCGGCTGTGGCCCGCTGGTGGGCTGAGCCACAAGGCCCCCGATGGCCCAGGAGCAGATGGGAGGACCCCGAGGCCAGACGCACACTGTCCGAGCCCTCTGCTCAGCCGCCTGGGACCCACCAGG…	0.665025	609
AGPAT3	FALSE	FALSE	FALSE	TRUE	TTAATGGCTGTGACTGAACACACGCGGCCCTGACGGTGGTATCCAGTTAACTCAAAACCAACACACAGAGTGCAGGAAAAGACAATTAGAAACTATTTTTCTTATTAACTGGTGACTAATATTAACAAAACTTGAGCCAAGAGTAAAGAATTCAGAAGGCCTGTCAGGTGAAGTCTTCAGCCTCCCACAGCGCAGGGTCCCAGCATCTCCACGCGCGCCCGTGGGAGGTGGGTCCGGCCGGAGAGGCCTCCCGCGGACGCCGTCTCTCCAGAACTCCGCTTCCAAGAGGGAGCCTTTGGCTGCTTTCTCTCCTTAAACTTAGATCAAATTTTTTGGTTTTTAATCAGTTATCTTGGGAACTTAACCTGGCCCCTCACCTCTTCTGCACCCCCCGCCCCC…	0.537403	4144
AGPAT4	FALSE	FALSE	FALSE	TRUE	GGGCACACGGTTCACGGAGAAGAAGCATGAGATCAGCATGCAGGTGGCCCGGGCCAAGGGGCTGCCTCGCCTCAAGCATCACCTGTTGCCACGAACCAAGGGCTTCGCCATCACCGTGAGGAGCTTGAGAAATGTAGTTTCAGCTGTATATGACTGTACACTCAATTTCAGAAATAATGAAAATCCAACACTGCTGGGAGTCCTAAACGGAAAGAAATACCATGCAGATTTGTATGTTAGGAGGATCCCACTGGAAGACATCCCTGAAGACGATGACGAGTGCTCGGCCTGGCTGCACAAGCTCTACCAGGAGAAGGATGCCTTTCAGGAGGAGTACTACAGGACGGGCACCTTCCCAGAGACGCCCATGGTGCCCCCCCGGCGGCCCTGGACCCTCGT…	0.473853	7171
AGPAT5	FALSE	FALSE	TRUE	FALSE	ACAAGTAGCTGTCTCCAGACAGTGGGATGTGCTACATTGTCTATTTTTGGCGGCTGCACATGACATCAAATTGTTTCCTGAATTTATTAAGGAGTGTAAATAAAGCCTTGTTGATTGAAGATTGGATAATAGAATTTGTGACGAAAGCTGATATGCAATGGTCTTGGGCAAACATACCTGGTTGTACAACTTTAGCATCGGGGCTGCTGGAAGGGTAAAAGCTAAATGGAGTTTCTCCTGCTCTGTCCATTTCCTATGAACTAATGACAACTTGAGAAGGCTGGGAGGATTGTGTATTTTGCAAGTCAGATGGCTGCATTTTTGAGCATTAATTTGCAGCGTATTTCACTTTTTCTGTTATTTTCAATTTATTACAACTTGACAGCTCCAAGCTCTTAT…	0.359087	2278
AGPS	TRUE	FALSE	FALSE	TRUE	ATCCATTAGTACCATTACAAAAAAATGTCAATTTTTTTTTTAAGTTTTCAACTGTGGTTATACTAGTAATCAAATATATCATGGACTATATTTTGGATACATTTGTTTCTTTGGTTTAAAATAAGTTTGTTTTCATTCTGTAGTTTGTTTTGTTTCTACATCTATGGATTGACAGATAGTATTCCTAAATCTCTCTCATTGTAGGTACATCATTTTACATTCAGCGGTTGTCATTTCAAATTTTAGTCAGGCAGCACAAAGCTGTCAATTATTCCAGAGGAAGCTGCTGCCAGCTGTTTTGTATTGTTGCTTCCTCTTGGGGAACAAAGACAGATTTGGTATCATTGATTGCTCAGCTAGCCTCTTTTTAAAAGAACGTTTCTGGGAATCAGATGTCTA…	0.335756	5641
AGR2	FALSE	FALSE	FALSE	TRUE	AGAAAAAAAATCTCCAAGCCCTTCTGTCTGTCAGGCCTTGAGACTTGAAACCAGAAGAAGTGTGAGAAGACTGGCTAGTGTGGAAGCATAGTGAACACACTGATTAGGTTATGGTTTAATGTTACAACAACTATTTTTTAAGAAAAACAAGTTTTAGAAATTTGGTTTCAAGTGTACATGTGTGAAAACAATATTGTATACTACCATAGTGAGCCATGATTTTCTAAAAAAAAAAATAAATGTTTTGGGGGTGTTCTGTTTTCTCCAACTTGGTCTTTCACAGTGGTTCGTTTACCAAATAGGATTAAACACACACAAAATGCTCAAGGAAGGGACAAGACAAAACCAAAACTAGTTCAAATGATGAAGACCAAAGACCAAGTTATCATCTCACCACAC…	0.385597	1097
AGR3	FALSE	FALSE	FALSE	TRUE	GAGATGATGGAAAAAAGCCTTCACTTCAAAGAAGTCAAATTTCATGAAGAAAACCTCTGGCACATTGACAAATACTAAATGTGCAAGTATATAGATTTTGTAATATTACTATTTAGTTTTTTTAATGTGTTTGCAATAGTCTTATTAAAATAAATGTTTTTTAAATCTGAGACTGAC	0.271186	177
AGRN	FALSE	FALSE	FALSE	TRUE	GCTGGCACCAGAGCCCCGCGCCCGCTGTAATTATTTTCTATTTTTGTAAACTTGTTGCTTTTTGATATGATTTTCTTGCCTGAGTGTTGGCCGGAGGGACTGCTGGCCCGGCCTCCCTTCCGTCCAGGCAGCCGTGCTGCAGACAGACCTAGTGCCGAGGGATGGACAGGCGAGGTGGCAGCGTGGAGGGCTCGGCGTGGATGGCAGCCTCAGGACACACACCCCTGCCTCAAGGTGCTGAGCCCCCGCCTTGCACTGCGCCTGCCCCACGGTGTCCCCGCCGGGAAGCAGCCCCGGCTCCTGAATCACCCTCGCTCCGTCAGGCGGGACTCGTGTCCCAGAGAGGAAGGGGCTGCTGAGGTCTGATGGGGCCCTTCCTCCGGGTGACCCCACAGGGCC…	0.617414	1137
AGRP	FALSE	FALSE	FALSE	TRUE	CTGGCCAACGTCAGGGTCGGGGCTAGGGTAGGGGCAAGGAAACTCGAATAAAGGATGGGACCAAC	0.584615	65
AGT	FALSE	TRUE	FALSE	TRUE	GGCCAGGGCCCCAGAACACAGTGCCTGGCAAGGCCTCTGCCCCTGGCCTTTGAGGCAAAGGCCAGCAGCAGATAACAACCCCGGACAAATCAGCGATGTGTCACCCCCAGTCTCCCACCTTTTCTTCTAATGAGTCGACTTTGAGCTGGAAAGCAGCCGTTTCTCCTTGGTCTAAGTGTGCTGCATGGAGTGAGCAGTAGAAGCCTGCAGCGGCACAAATGCACCTCCCAGTTTGCTGGGTTTATTTTAGAGAATGGGGGTGGGGAGGCAAGAACCAGTGTTTAGCGCGGGACTACTGTTCCAAAAAGAATTCCAACCGACCAGCTTGTTTGTGAAACAAAAAAGTGTTCCCTTTTCAAGTTGAGAACAAAAATTGGGTTTTAAAATTAAAGTATACAT…	0.453074	618
AGTPBP1	FALSE	FALSE	FALSE	TRUE	GCCCGCTGCCATCTCTTGTTAACTGCAAAGAATAAATGAAATATCTTGGTTTTTATTTCCCAGGAAGCTTGAGAGAAATGAGTTTATACAGAGCTGACTCAAAAAGACAAAAAGTAACTTGGGCCAGTTTGGTTTCAAGATAATAAATGTGTTATTAATTAATGATAAAATTGGCGCTTGTTTTATTTTCGATATTCAATGCACTTTATGTAGCATTGAATGATCAAATATTGGATTTACCTTTAAAAAAAAAACCTGAGTATCATTGCATGAATTTTTATCTCCCTATGGTTATATCCTGCATCAAGTGGATAATTTTGAAGTGTGTTCAGAATATAAAATTGAAATTTTAGAGTTGTTGAAAATCCTGACTTGTTGAAAACTAATATATATGTACAT…	0.308772	570
AGTR1	FALSE	FALSE	FALSE	TRUE	CATGTTCGAAACCTGTCCATAAAGTAATTTTGTGAAAGAAGGAGCAAGAGAACATTCCTCTGCAGCACTTCACTACCAAATGAGCATTAGCTACTTTTCAGAATTGAAGGAGAAAATGCATTATGTGGACTGAACCGACTTTTCTAAAGCTCTGAACAAAAGCTTTTCTTTCCTTTTGCAACAAGACAAAGCAAAGCCACATTTTGCATTAGACAGATGACGGCTGCTCGAAGAACAATGTCAGAAACTCGATGAATGTGTTGATTTGAGAAATTTTACTGACAGAAATGCAATCTCCCTAGCCTGCTTTTGTCCTGTTATTTTTTATTTCCACATAAAGGTATTTAGAATATATTAAATCGTTAGAGGAGCAACAGGAGATGAGAGTTCCAGATTGTT…	0.343785	893
AGTR2	TRUE	FALSE	FALSE	TRUE	ACGTGAGAGCAAAATGCATGTAATCAACATGGCTACTTGCTTTGAGGCTCACCAGAATTATTTTTAAGTGGTTTTAATAAAATAATAAAATTTCCCCTAATCTTTTCTGAATCTTCTGAAACCAAATGTAACTATGTTTTATCGTCCAGTGACTTTCAGGAATTGCCCATTGTTTTTCTGATATGTTTGTACAAGATTGTCATTAGTGAGACATATTTACAACCTAGAAGTAACTGGTGATATATCTCAAATTGTAATTAATAATAGATTGTGAATAATGATTTGGGGATTCAGATTTCTCTTTGAAACATGCTTGTGTTTCTTAGTGGGGTTTTATATCCATTTTTATCAGGATTTCCTCTTGAACCAGAACCAGTCTTTCAACTCATTGCATCATTT…	0.324375	1600
AGTRAP	FALSE	FALSE	FALSE	TRUE	TCTGTTGAGCTTCTGGAGACATTTCTCTGCCAAACCAAGACTGGAAACCATTGAGCTCACCTGTGCACTTTGCAAACTTCGAAGTGCAGCGCACAGGGCAACAGCTGGGCTGCATTGTATTCTCAGGCTCCTATGCCTGGGCCAACTTCACCATCCTGGCCTTGGGCGTGTGGGCTGTGGCTCAGCGGGACTCCATCGACGCCATAAGCATGTTTCTGGGTGGCTTGCTGGCCACCATCTTCCTGGACATCGTGCACATCAGCATCTTCTACCCGCGGGTCAGCCTCACGGACACGGGCCGCTTTGGCGTGGGCATGGCCATCCTCAGCTTGCTGCTCAAGCCGCTCTCCTGCTGCTTCGTCTACCACATGTACCGGGAGCGCGGGGGTGAGCTCCTGG…	0.598784	658
AGXT	FALSE	FALSE	FALSE	TRUE	CCTGCCCACTGGCACACAGCTGGCACTGGCACACACCTGTCCCATGCCCACCCTGAGGGATCAGGAGCAAACAGACCCTGCAAGGTCCTCCAGGCCTGGGGACAGGAAAGCCACTGACCCAGCCCGGGAGGCAGAACCAGGCAGCCTCCCTGGCCCCAGGCAGCCCTTTTCCCTCCAGTGGCACCTCCTGGAAACAGTCCACTTGGGCGCAAAACCCAGTGCCTTCCAAATGAGCTGCAGTCCCCAGGCCATGAGCCTCCCGGGAATGTTTAATAAAGGGCCTGGCCAACTCTCCTCAC	0.625418	299
AGXT2	FALSE	FALSE	FALSE	TRUE	CATTGTCAGAAATAAATAAAACCACAAGTCTCAAGAATTTGCCACGTATGTTCAAGGGTGAATTTGAAGAATTTCAGAACCACTGGTATCCAGAGAAAGCCTGCAGCTCTCCACAGGAGCTGTAAAAGTCATGGTTGACTGCCTACCAACCATATTTGTTAGCAGAGCCCCTCTTATCTTGAGAACTCCATTCTTCAGGGAAAGGATCTCCCTAGCTCAGAGAATAAATCCTAATTAGTTTATGTTAGGTATGGTAATTTGATTCCCCTTTGCAGTGATTGGTTTATGCATGAATATGTGATGTATTTTTGTCCAGTGAATCTTGAAGAAAAATCTTTTGGTGGAGGTGCCTTCAGGGAAAGTTTTCTTCACCCTCACTCTTCAGTTCAAGAAGAGATG…	0.419094	618
AHCTF1	TRUE	FALSE	TRUE	FALSE	TTTCTTGGGAAGATTTTAATGTACACCTATTTGTAAAGTCATCAGAATAGTGTGGATTATTAAATATCTAGTTTGGAAGAAAATAATTTATATAAATTATTGTAAATTTTTATGTAAACAGAAGGTCTTCAATAAGTAAAGTAACTCCATATGGAGTGATTGTTTCAGTCCAGGCAATTTTTCTATTTTATATTAAGACTTCATACATTTATATATGTAAATATGGCTTATTAATGGAATGTTAAATAAAATGTATACTTCACAGTCGTTTGTGTCTTGGATTTTTGAAAGGGAGGGGATATCTGTTTAAATAGTTTTATATGCTCATTGGTCTCATTTTCTCTATAATTAAAATACTAGACCAGTCTTAAAATGGGGATGATTGAAGTATTGATATTT…	0.309719	1708
AHCY	FALSE	FALSE	TRUE	FALSE	GAGCCAGGTCTGCGTTTCACCCTCCAGCTGCTGTCCTTGCCCAGGCCCCACCTCTCCTCCCTAAGAGCTAATGGCACCAACTTTGTGATTGGTTTGTCAGTGTCCCCCATCGACTCTCTGGGGCTGATCACTTAGTTTTTGGCCTCTGCTGCAGCCGTCATACTGTTCCAAATGTGGCAGCGGGAACAGAGTACCCTCTTCAAGCCCCGGTCATGATGGAGGTCCCAGCCACAGGGAACCATGAGCTCAGTGGTCTTGGAACAGCTCACTAAGTCAGTCCTTCCTTAGCCTGGAAGTCAGTAGTGGAGTCACAAAGCCCATGTGTTTTGCCATCTAGGCCTTCACCTGGTCTGTGGACTTATACCTGTGTGCTTGGTTTACAGGTCCAGTGGTTCTTCA…	0.486945	766
AHCYL1	TRUE	FALSE	FALSE	TRUE	TGGACCATACTACCAAGGACCAGTCCACCTGAACCACACACTCTAAAGAAATATTTTTTAAGATAACTTTTATTTTCTTCTTACTCCTTTCCTCTTGATTTTTTTCCTATAATTTCATTCTTGTTTTTTCATCTCATTATCCAAGTTCTGCAGACCACACAGGAACTTGCTTCATGGCTCTTTAGATGAAATAGAAGTTCAGGGTTCCTCACTCTAGTCACTAAAGAAGGATTTTACTCTCCCAGCCCAGAAAGGTGATTCTTTCTTTACCATTTCTGGGGACTTTAGTCTTAATTAGGTACCTTATTAACAGGAAATGCTAAGGTACCTTCTCTGTGGAACAATCTGCAATGTCTAAATCGCCTTAAAAGAGCCCATTTCTTAGCTGCTGAAATCAGT…	0.399321	2061
AHCYL2	TRUE	FALSE	FALSE	TRUE	GTTCCTGTAACTCAAACCAGAATTTTTAAGGAATAGAACTCCAAGCCTTTTCTCCACTACTATACAAGAAAGAATTCAGCAAGCTGCTTCTCCAATCAAAGCTGCCTGCCGTGCTCACCCTGTGTGTTAGGTTATTTATTTATTAAAATCAAGAATCCTGTGCCTGTAGTGTTGGCCCAGAGTGTGGTTACTGCCCTGAGGGCCATGAAAGCCACAGAGGATGGGCTGAGGAAGGAAAGAAATGGGGTTACTGCTCCCAGTGCATCATTTGCATCATTCCCCATTGACTGAATCCTCAGCAGTGGCCGTTTTTCCTCTTGTCCAGGCTCACGAGTTAGTCCAGGGATTCCATACTCCCTATTCCCTGGAGTTTTCTGGAATAAATTTTCAGCACCTGCT…	0.417877	3166
AHI1	FALSE	FALSE	FALSE	TRUE	AGAATTGAAGAAAAGTTAAGAGCTGCCGAAATGCACAGAGGTGAAAATGACAAACCAAATGGAATTTCTCTTCAGAGTTCAGAATTTTCAGATACTAAGGAGGAAGAAAGGATCCACTACTTCTTGTTCTTATGAATGACTCTAGAAAAATCAGAATCAAGTTGTGGGTGGAAAAATCAACGTGGCCTTTGAGTTCAGTTGTTATAAACCATTGTGACTATTGTTGGTCAAAGTATTGGTACTTATATTGTTAGTAATTGCATCATAATTACATTACCAGTGTTGGAAAACTAATGAAGAAAACACTGTAATTGCTACTCAGCAAATGTGAATAAAAGGTGTTTGCGTTATTAGGATGTCTGTTAAGTAATCATTTAATATTATTATATTGGTAATGGT…	0.352579	2113
AHNAK	FALSE	FALSE	FALSE	TRUE	CAGGCCTTTGTATGTGTGTACATATATATATATATAACAAAACATCAGCCTTGGGTGGTGTGTTCCTATATAAACTCCAAAGGGAAACACACCGACTGCCTCAGCAATCATGCAAAGACCTTGCCTGGCCCGGTGGCAAGCGCTGAAAAACCGACCGCCTGTAGGCTCCTGGAACTATACAGATAGGTAAAGAGTTCCAAGTTCGTCCAGCCCATGTGCAAAGTCAACAGTATTTGCCTTAAGATTTCATATATATATATTTTTTTGCATTGACTGCTGAGAGCTCCTGTTTACTAAGCAAGCTTTTGTGTTTATTATCCTCATTTTTACTGAACATTGTTAGTTTTGGGGTAATGGAAACCCACTTTTTCATTGTAATGACTTTGGGGGCTTTTGTTA…	0.426698	839
AHNAK2	FALSE	FALSE	FALSE	TRUE	GAGGTATGGCTCATCAGTACAAGAGAGATGCAAAAAACTAAGTTGGAAAGTAAAGGCTACACACACATATGGAGCACCCCATCCCACAGCACATTACATCCACCTCACTTCACAGAACGGAGAACAGAGCAGAAATGACCAGAACACCTTTGTCACCATCACACAGCCCTCCTAAAATGGAACCAAAGCTTCCCAGCTCCCTCAAAGCTTTGGATGCAAAGAAGGCACCCTGACTTCCACAAGACACCAGAATTCACACGGTACTCAGAGGCACTGCTGGGGAAGTTTGTTGGTCTTTATTAGATAAATTTCCAGAGACCTGTCCATAATACCCAACAGAACATGACTGTTTCTTTGAGGAAAGGGTTATAATGTCTGTGGTGTACAAGTCGTTTTTGG…	0.482716	810
AHR	FALSE	FALSE	FALSE	TRUE	TTCCAAGCCCAATTTTGACCCTGGTTTTTGGATTAAATTAGTTTGTGAAGGATTATGGAAAAATAAAACTGTCACTGTTGGACGTCAGCAAGTTCACATGGAGGCATTGATGCATGCTATTCACAATTATTCCAAACCAAATTTTAATTTTTGCTTTTAGAAAAGGGAGTTTAAAAATGGTATCAAAATTACATATACTACAGTCAAGATAGAAAGGGTGCTGCCACGGAGTGGTGAGGTACCGTCTACATTTCACATTATTCTGGGCACCACAAAATATACAAAACTTTATCAGGGAAACTAAGATTCTTTTAAATTAGAAAATATTCTCTATTTGAATTATTTCTGTCACAGTAAAAATAAAATACTTTGAGTTTTGAGCTACTGGATTCTTATTAG…	0.329229	3086
AHRR	FALSE	FALSE	FALSE	TRUE	CGCAGTGACCACCATCCAAGCTCAGATCTGTGTGTCTACGCTCAGATGCGTCGGTGGCTGGGCTGCCCTGCTCCTGGTCAGGCCGGAGCCCGTCCTAAGACACACGCTTTGCAGAGCTGTGCATGCGCAGTCTGCTAGTGTGTGTGTGCAGCATACGCAGGAGCCTATCCTGAATTTTGTAAAATATCCCAACAGTTCTTAAATGAAAACTGGCCTTAAGTCTATTCAAGCATGACAGCATTTCTCTTTGAGGAATTAAAATCTTTAGGAAAGTGATCATGGCTGGACAGCTTCATGCCCCAGAGGCAGCGAGCACCCGTCCCATGGCTGCCAAGTCCACAGTCGGGGATGAAGCAGTCGGGTGATGCTCCCAAGTCCGCAGTCGGGGATGAAGCGGTC…	0.5337	3457
AHSA1	TRUE	FALSE	FALSE	TRUE	AGTGCAGTGGCATAATCACAGCAAACTGCAGCCTTAACCTCCCAGACCCAAACGATCCTCCTGCTTCAGCTTCCCAATGCTGGGATTACAGGTGTGAGCCACCACGCCCAGCCAGGTTGCCCCAGTCTTAAACTCAGATGGAAACCTAGATATGAAACCTCCGTCCCCTCTGCCTTTCCCAGGACACTTTGCCACCATCACCTTGACCTTCATCGACAAGAACGGAGAGACTGAGCTGTGCATGGAAGGTCGAGGCATCCCTGCTCCTGAGGAAGAGCGGACGCGACAGGGCTGGCAGCGGTACTACTTTGAGGGCATTAAACAGACCTTTGGCTATGGCGCACGCTTATTTTAGGGCCAGCGGCAGGGGACTCCAGCCTGCTGGACACTTCAGTCCAG…	0.531142	578
AHSG	FALSE	FALSE	FALSE	TRUE	GCTAGACATGGCAGAGATGAGGAGGTTTGGCACAGAAAACATAGCCACCATTTTGTCCAAGCCTGGGCATGGGTGGGGGGCCTTGTCTGCTGGCCACGCAAGTGTCACATGCGATCTACATTAATATCAAGTCTTGACTCCCTACTTCCCGTCATTCCTCACAGGACAGAAGCAGAGTGGGTGGTGGTTATGTTTGACAGAAGGCATTAGGTTGACAACTTGTCATGATTTTGACGGTAAGCCACCATGATTGTGTTCTCTGCCTCTGGTTGACCTTACAAAAACCATTGGAACTGTGACTTTGAAAGGTGCTCTTGCTAAGCTTATATGTGCCTGTTAATGAAAGTGCCTGAAAGACCTTCCTTAATAAAGAAGGTTCTAAGCTGAA	0.46134	388
AHSP	FALSE	FALSE	FALSE	TRUE	CTCAGGGACCCAGCCCCTCCTCTCTGAGAAACTCTGACCTTCATGTCCTTAGGCTGTGCTCCTGCCACTCTACCCTGACACCTCAATAAAGACCAGTGCTGGTTTTGTTGGA	0.535714	112
AICDA	FALSE	TRUE	FALSE	TRUE	TAGCAACTTCCAGGAATGTCACACACGATGAAATATCTCTGCTGAAGACAGTGGATAAAAAACAGTCCTTCAAGTCTTCTCTGTTTTTATTCTTCAACTCTCACTTTCTTAGAGTTTACAGAAAAAATATTTATATACGACTCTTTAAAAAGATCTATGTCTTGAAAATAGAGAAGGAACACAGGTCTGGCCAGGGACGTGCTGCAATTGGTGCAGTTTTGAATGCAACATTGTCCCCTACTGGGAATAACAGAACTGCAGGACCTGGGAGCATCCTAAAGTGTCAACGTTTTTCTATGACTTTTAGGTAGGATGAGAGCAGAAGGTAGATCCTAAAAAGCATGGTGAGAGGATCAAATGTTTTTATATCAACATCCTTTATTATTTGATTCATTTGAG…	0.386686	2118
AIDA	TRUE	FALSE	FALSE	TRUE	TCCTGACATGATGAACCTGGAACTTCTGTGAATTTTACCACTCAGTAGAAACCATCATAGCTCTGTGTAGCATATTCACCCTTCAACAGGCAGGAAGCAAGCCGTACCCAGACCAGTAGGCCGGACGGAGTCCAATGCAAAGCTGTACCACAGAATTCAGAGTCCAGCACATCACACTGACGTATAGGACTCCTTGGGATACAGGTTTATTGTAGATTTTGAAACATGTTTTTACTTTTCTATTAATTGTGCAATTAATAGTCTATTTTCTAATTTACCACTACTCCTACCCTGCTTCCTGGAACAATACTGTTGTGGGTAGGATGTGCTCATCTTCAGACTTAATACAGCAATAAGAATGTGCTAGAGTTTACACATCTGTTCACTTTTGCTCCAATA…	0.372872	1880
AIF1	FALSE	FALSE	FALSE	TRUE	TTTGAAGGGAAAAGGGATGATGGGATTGAAGGGGCTTCTAATGACCCAGATATGGAAACAGAAGACAAAATTGTAAGCCAGAGTCAACAAATTAAATAAATTACCCCCTCCTCCAGATCAA	0.396694	121
AIF1L	FALSE	FALSE	FALSE	TRUE	CCAGAAGTACAGTGATGAAGAGAACCTTCCAGAAAAGCTCACAGCCTTCAAAGAGAAGTACATGGAGTTTGACCTGAACAATGAAGGCGAGATTGACCTGATGTCTTTAAAGAGGATGATGGAGAAGCTTGGTGTCCCCAAGACCCACCTGGAGATGAAGAAGATGATCTCAGAGGTGACAGGAGGGGTCAGTGACACTATATCCTACCGAGACTTTGTGAACATGATGCTGGGGAAACGGTCGGCTGTCCTCAAGTTAGTCATGATGTTTGAAGGAAAAGCCAACGAGAGCAGCCCCAAGCCAGTTGGCCCCCCTCCAGAGAGAGACATTGCTAGCCTGCCCTGAGGACCCCGCCTGGACTCCCCAGCCTTCCCACCCCATACCTCCCTCCCGATCTT…	0.516567	3169
AIFM1	FALSE	FALSE	TRUE	FALSE	AAAAAGATACAATGAAAGAATTTCAGGGTTAGGGCTGACACCAGAACAGAAACAGAAAAAGGCCGCGTTATCTGCTTCAGAAGGAGAGGAAGTTCCTCAAGACAAGGCGCCAAGTCATGTTCCTTTCCTGCTAATTGGTGGAGGCACAGCTGCTTTTGCTGCAGCCAGATCCATCCGGGCTCGGGATCCTGGGGCCAGGGTACTGATTGTATCTGAAGATCCTGAGCTGCCGTACATGCGACCTCCTCTTTCAAAAGAACTGTGGTTTTCAGATGACCCAAATGTCACAAAGACACTGCGATTCAAACAGTGGAATGGAAAAGAGAGAAGCATATATTTCCAGCCACCTTCTTTCTATGTCTCTGCTCAGGACCTGCCTCATATTGAGAATGGTGGTGT…	0.473282	1965
AIFM2	FALSE	FALSE	FALSE	TRUE	TGGAGAGGCCAGGCGGGAGAACTACCGCAGCAGGTGGGCGTACGGACTGCTTGGCGCATGGCACCCGCCTGGCAAGTGCTAGAACTAATGCTATTCTTCTGGAATAAGATGCCAATGATGTGGTGGCTAGAAATGCAACTTGTATAAAACAAAAATGGGAGAGAGAGAGGTATTAAACAAATACCCCCCTTAGAGGATACTTTCTGGGTTTGGAAGGTGTGCTTGCTGTGGTACTGGGTGAGCGGCTCATGTGTGCTGGCTGCATGGTGCTGGGGAGGCCACAGCCAGCCCTTCCTCTGCACCTGCCTCCTCTGGGATGTGCATGTGTGTGTACGTGCTTGTGGTCATGACGCGTGCCATTTAGAGCTCTCAGAGCAGGGCAGATTGCTGGGCTCTGGT…	0.524633	1908
AIFM3	FALSE	FALSE	FALSE	TRUE	GCTCACATGCAGTAGACTTGGGCAGGCAAAGGGGGCACCAAGGGCACAGGCCAAGCCTTGGGGGCAGGTGCCAATCTCCAGTCCCAGGATCCCCCAGGGCAGAACCTGAGCCCTCCCAGTGCTTGCCTTCAGCCACCTGGCTCCCCTCCTGGGAGGCCTCTGCTGGATCCAGAAGATGCTCAACCCTCAAGGCCTCTGCTGCCACTGACAGCTGGCACTGGAGGCAGGACAAGCCCTGCCTCTTCTCCCTCTATTGGGACTGGTCCCCTGAAGAACCCTGCAACACGTTAAACATTACCGTAAAATTAAAACGCACAAATTTGCAGATC	0.583587	329
AIG1	FALSE	FALSE	FALSE	TRUE	CAACTAGATTCCACCACTTTGGGCTTTTACACAGAACTACAGTATGATCAGCTTGGTTGAAGTTTGGCACTCGACACTCTGCTCAATTGAAGACATATGCACAAAATCACTTACCACATTTTTTAACCTGTTTTTCACACTGGGTAGGCCTGTAATATTTGCATAAAAATATGAAAAGCAACCTTCTGCAGGGAGAGAAGGCAATTAAAAGATGTTGCGACCTTTCTTTCTGCAGCATTTCAAAGCTTAAAGTTTTCTTGGCACGCTTTTCAAACGCCCATCTGACTTTGAAGCAGGCTGCCTCTCCACAGAAAGCTTGCTCCAGCAATGACTAAAGGATTGACCTGGTGCCATGCATGCTGCTCTGCACAAGAAGGACATTTGGAAATGACCTTGAAG…	0.389825	3204
AIM2	FALSE	FALSE	FALSE	TRUE	AGAAGTAAAAAGGACCAATTCAAGCCAACTGGTCTAAGCAGCATTTAATTGAAGAATATGTGATACAGCCTCTTCAATCAGATTGTAAGTTACCTGAAAGCTGCAGTTCACAGGCTCCTCTCTCCACCAAATTAGGATAGAATAATTGCTGGATAAACAAATTCAGAATATCAACAGATGATCACAATAAACATCTGTTTCTCATTCA	0.360577	208
AIMP1	FALSE	FALSE	FALSE	TRUE	AATGCTTCCACTACCAAAAGACATTAGAGAAAACCTTAAAAGTAATAAAGAGAAATATATTTGTCACTTATACCTAAAATATGAGTGGCTCATTTTTGCATTACTCTCTTCTAGACTTGACTAGTCATTTACTTGGTATATATTGTTTTCATTGATTGGGGAAACACTAGATTTTTACCTCGGTTTTTGATCATTTATAATGGAGAGAGGAAGTTGCCTATGTTTTGTAATAATTTATTTTTTAGCAGGAATATTGATTAGCAGCTTTTTTTTCTTTATACACATAGATAACTAACTAGATTAATGTTTAGTTTCTTATTTGTAGGCACAGGATGCATGAAATTTCAAGCTCTGGGATTTTTTGTATATTGTGTATCTGTATCAAAAATATCCTCTCCT…	0.317471	1534
AIMP2	FALSE	FALSE	FALSE	TRUE	CTGGGATTACAGGTGCCCCCCACCAAGCCCAGCTAATTTTTGTGTTTCAGTAGAAATGGAGTTTCATCATGTTGTCCTCTCGAACTCCTGACCTCAAGTGATCCACCCGCCTCGCCCTTCCAAAGTGCTGAGATTACAGGTATCAGCCACTGTGCCTAGCCAGCACTCAATAATTTAATTGGCATACTGAACTCTGTTCCACCCGGAAGTCAGTGGACTTCACATTTCTCTGACGTTTGATCTTAAATAAGAGCAGCAGACTAGGAGAGGTGAGAAAGTGCTGATTAAGCCCGAAGGTAAATAGGAGTTAAGCAAACAAGAGAAGAAGGAAGAGTGATGCAGATGGAGGGAACAGCACATGTGAAGATCTGTGGTCAGAGCCAGGGTGGTGGTTTAGGA…	0.47482	556
AIP	FALSE	FALSE	FALSE	TRUE	CAGGAGCACTTGGCCCTGCCTTACCTGCCAAGCCCACTGCTGCAGCTGCCAGCCCCCCTGCCCGTGCTGCGTCATGCTTCTGTGTATATAAAGGCCTTTATTTATCTCTC	0.572727	110
AIPL1	FALSE	FALSE	FALSE	TRUE	TGAGGAGCGGACAGTCATTGACGACAGTCGGCAGGTGGGCCAGCCCATGCACATCATCATCGGAAACATGTTCAAGCTCGAGGTCTGGGAGATCCTGCTTACCTCCATGCGGGTGCACGAGGTGGCCGAGTTCTGGTGCGACACCATCCACACGGGGGTCTACCCCATCCTATCCCGGAGCCTGAGGCAGATGGCCCAGGGCAAGGACCCCACAGAGTGGCACGTGCACACGTGCGGGCTGGCCAACATGTTCGCCTACCACACGCTGGGCTACGAGGACCTGGACGAGCTGCAGAAGGAGCCTCAGCCTCTGGTCTTTGTGATCGAGCTGCTGCAGGTTGATGCCCCGAGTGATTACCAGAGGGAGACCTGGAACCTGAGCAATCATGAGAAGATGAA…	0.536364	2750
AIRE	FALSE	FALSE	FALSE	TRUE	CCCCAGATGGCCGGGACATGCAGCTCTGATGAGAGAGTGCTGAGAAGGACACCTCCTTCCTCAGTCCTGGAAGCCGGCCGGCTGGGATCAAGAAGGGGACAGCGCCACCTCTTGTCAGTGCTCGGCTGTAAACAGCTCTGTGTTTCTGGGGACACCAGCCATCATGTGCCTGGAAATTAAACCCTGCCCCACTTCTCTACTCTGGAAGTCCCCGGGAGCCTCTCCTTGCCTGGTGACCTACTAAAAATATAAAAATTAGCTGGGTGTGGTGGTGGGTGCCTGTAATCCCAGCTACATGGGAGCCTGAGGCATGAGAATCACTTGAACTCGGGAGGTGGAGGTTGCAGTGAGCTGAGATTGCGCCACTGCACTCCAGTCTGGTCGGCAAGAGTGAGACTC…	0.51626	492
AJAP1	FALSE	FALSE	FALSE	TRUE	CTGGCCGAAGTCTTTTTTACCTCCTGGGGGCAGGGCAGACGCCGTGTGTCTGTTTCACGGATTCCGTTGGTGAACCTGTAAAAACAAAACAAACAAAACAAAACAAAAAAGACAAAACCTAAAACTGAGCTATCTAAGGGGGAGGGTCCCCGCACCTACCACTTCTGTTTGCCGGTGGGAAACTCACAGAGCAGGACGCTCTAGGCCAAATCTATTTTTGTAAAAATGCTCATGCCTATGGGTGACTGCCTTCTCCCAGAGTTTTCTTTGGAGAACAGAAAGAAGAAAGGAAAGAAAGGAACCAGAGGCAGAGAGACGAGGATACCCAGCGAAAGGGACGGGAGGAAGCATCCGAAACCTAGGATTCGTCCTACGATTCTGAACCTGTGCCAATAATAC…	0.459847	10049
AJUBA	FALSE	FALSE	FALSE	TRUE	GCTGCAATCACTGCTGCTGCTGTCACCCTGCAGACAAACTGCTGTGGCCAGTGGGCCCCTCTGAGGCCAGCCAAGGCAAAGAATGCACTCTGCAGGCCTGGCAGAAGAGTCCTCTGGGGAGGACCCCAAGGGCCGGAGACCCAAAGATCATGATATTCCAAATGGATTGTGGAAGAGAAACCTTATATTTACCAGGGTGGGGGCGACTGGCCTTTTTCCCATGTGTGCAGTCTGAGCTTAGGCACACACAGGAGGGTTCCAGGACTTTCTGAACATCTGATTCTGTATCTTCAGTATATATATTTTGTTTGTTTTAGAGATGGGATCTCACCATGTTGCCCAGGCTAGTCTTGAACTCCTGGGCTCGAATGATCCTCCCACCTTGGCCTCCCAAAGTGC…	0.419568	2269
AK1	FALSE	FALSE	FALSE	TRUE	CAACGCTGGAGCCGCTTCCCCAGCTCAGAGCCCCGCCCCACCCCGTCCTGATTCGAGGTCCTCCTGGCCTGAGCGCAGCGCCTCCACCCTGCCCTGCTGAGCACAGACGGAGGAAGCCGCTTATCCTGTTTTCATGGACAGCTGAGCACTAAAGGAATTTCTAAGGACATTTGGTTTTACTGCTTTTTCTCTGCTTCCAGTTGGAGTTGATTCATGTGCTTGTGCCTACCTGGCCGCAAGTCCCCAGCCCCTCAACCCTCCGTTCCTCCTCAGCCTCCCTTTGCCAGCCACCCCTCCTCTAGCTCTGGTGGGAGGCCCGGGGCCCTTCCTCGCACAGGGCATGCCTGGCCTGAGGACCCGGCGCTGAGTGGCGGGGCCCCTGCTCCGAGGGGCTCATGT…	0.568717	1528
AK2	FALSE	FALSE	TRUE	FALSE	CATCACCGGGGAACCCTTGATCCGTCGATCAGATGATAATGAAAAGGCCTTGAAAATCCGCCTGCAAGCCTACCACACTCAAACCACCCCACTCATAGAGTACTACAGGAAACGGGGGATCCACTCCGCCATCGATGCATCCCAGACCCCCGATGTCGTGTTCGCAAGCATCCTAGCAGCCTTCTCCAAAGCCACATCCTAGTATCAGAAGGCCAGGCGAGACTGCAACACTGCTCATCACCCCGCGGCGTGATCCCTGCTCTTAGGTGCTGGGCAGAGGGGAAGGGTGGTCAGGGTGAGGATGGTGAGGGAGGGCTGGTGAGGGGCTCAGAGGAATACTTGGAACAACAGCAGTGTTATTGTAGTGTGGCAGTTTCTTTTATACATAGGTGAGAGTTT…	0.448399	3091
AK3	FALSE	TRUE	FALSE	TRUE	GGAGAAATGTGTGTAACTATTAATAGTAAGATGGGCAAACCTCCTAGTCCTTGCATTTAGAAGCTGCTTTTCCTAAGACTTCTAGTATGTATGAATTCTTTGAAAATTATATTACTTTTATTTCTACTGATTTTATTTTGGATACTAAGGATGTGCCAAATGATTCGGATACTAAGATGCATCGTTTGAAATCATCTAGTGTGTTGTATGCAGTTATCCTCAAAAACATCAGCGATGTCTGAACCTTTAAAACATCTGTTAGAGCAAAATTAAAAGAGCATTTGGTAGTAATCTAACTTTTTGTTCAGTTAATAAGTGGTTGATAAAGTTTCCATATTTTTCTGGAAAAGTTAAAAAAAGTTACATGTCATTTGGAGAAAATACGTAATCAGAAATTTG…	0.368452	3417
AK4	FALSE	FALSE	FALSE	TRUE	CCCTGCCCAATGGAAGAACCAGGAAGATGTGGTCATTCATTCAATAGTGTGTGTAGTATTGGTGCTGTGTCCAAATTAGAAGCTAGCTGAGGTAGCTTGCAGCATCTTTTCTAGTTGAAATGGTGAACTGATAGGAAAACAAATGAGTAGAAAGAGTTCATGAAGAGGCCCTCCTCTGCCTTTCAAAAGGCTGGTCACCTACACATGTTTAAGGTGTCTCTGCACATGTCTCAAGCCCATCACAAGAAAGCAAGTACAGTGTGGATTTCAAATGGTGTGTAACTTCAGCTCCAGCTGGTTTTTGACAGCTGTTGCTGTGGTAATATTTTTGACATGTGATGGTGATAGTCTCTGGTTCTCCCCATCCCCACAAAGGCTGTTGAACCACAGCACCAGGAA…	0.398291	5968
AK5	FALSE	FALSE	FALSE	TRUE	AGGCAAAAATGCATGTTTGTTAGAATGGAAACAGAAAAACATTAAAAAGTTCATTCCTTAACACAATGTTTCAAGTTAAACCTTTTGTGTCACCGCCCCCACCAACCACCACCTCCTAAATCCTGACAGCACTGTTTGCTTCCCAGCTAGACCTGTGTGAGAGGTGTCTGGAAATCATGCATGGTGTATTTGGGACTATATCAACCTATTCTCCACACTTCAGACAACTGTCTGCACTCACGGCACACACACTTTGTATCATGCAGGCCACACTCAGAGCTAGTCAGTACATGAACAGTGGTGCGGTGCCAGTCTGTGTCCGTTGTGATCACAGGCCTTGCTAGACCCTGATCATCTGGTTCTCCTCTCATTAAGCATCCCTAACCCCCAGTCACACCT…	0.39107	1299
AK7	FALSE	TRUE	FALSE	TRUE	AACTTGAAAGATCTGGTATTATCTACCTTTACAGAACCACAGATCACTTATTATACTTTGAAAAATTGCTTTGAAAAATGCTTTTCCAGTTCTTAGAAAATTCTTTTTTTGTAGACAAATATTCTATAAACTAGAATCTCTATTAAAAGCTATATGACATGACTATGTCATTAAAACTATATTTGAAATGTAAATTGATAAAGACATTTGTGCATAGCTCATGAGACAAATACTGATTTAATATTTTATTCTTTAGTCAGATCTAAATATACCGCTTCTGTACACTAATGTTTATAGGTATTTATAGCATGAAGAAAATCAGACTATATATTGTAGACTATGTATTATTCTAACATGTAGGCTAATTTACATGACTTGTTATCGCCCCAATAACAATGT…	0.323801	1084
AK8	FALSE	FALSE	FALSE	TRUE	TGGGTTCAGAGCCAGGAGCGCTGCCCCAGGGAAAGAGTTAATCCCCTGCCCCCAGCCCCCCAGCCTCGGCACAGCTCCCCTAAAAAGCCAATAAAGCCTGCTGGATACAG	0.609091	110
AK9	FALSE	FALSE	FALSE	TRUE	GATTACAGGCATGAGCCATCACACCCAGCCTTTGCCTTCTGGCTTAAGACACTCTTGTAACAGCTTTTCAAGGCTGACCCTCTTGTAACCTGATTTCCATCTGTATAAAAATGTCCAGCCAAACAAGGAGAAGAGAAAAAGAGGAATATCAGAAAATACAACTTGCTACAAGTGCAACCACATGTCACCCTGGTGTGAATATGCTGGACTTCCGTACAGAGGACTGCTGATATTGTACAGTGCAACTGCAACTGCAACTGCAGGCACAAAGCATTGCAGAAGCGGGGCCAAAGTAATTGTTGCTTTGTCAAAACAAAATATTCACAACCAAAAGTAGATAAGAAAAAACCATTGGACTGAGAAAATTATGGCACCATGTAAGAATAAGAACCCTCCTCT…	0.373086	1241
AKAP1	FALSE	FALSE	FALSE	TRUE	CCCCAGCGTAGACAGTTCAGACCGCTAACTTACAGGTTCTGACAGGAACAGCATGGATTCCGTGGATAGCTGTTGCAGTCTCAAGAAGACTGAGAGCTTCCAAAATGCCCAGGCAGGCTCCAACCCTAAGAAGGTCGACCTCATCATCTGGGAGATCGAGGTGCCAAAGCACTTAGTCGGTCGGCTAATTGGCAAGCAGGGGCGCTATGTGAGTTTTCTGAAGCAAACATCTGGTGCCAAGATCTACATTTCAACCCTGCCTTACACCCAGAGCGTCCAGATCTGCCACATAGAAGGCTCTCAACATCATGTAGACAAAGCGCTGAACTTGATTGGGAAGAAGTTCAAAGAGCTGAACCTCACCAATATCTACGCTCCCCCATTGCCTTCACTGGCACT…	0.47056	2055
AKAP10	FALSE	FALSE	FALSE	TRUE	CTCAAAACTTGAGATAAAGGAAATCTGCTTGTGAAAAATAAGAGAACTTTTTTCCCTTGGTTGGATTCTTCAACACAGCCAATGAAAACAGCACTATATTTCTGATCTGTCACTGTTGTTTCCAGGAGAGAATGGGAGACAATCCTAGACTTCCACCATAATGCAGTTACCTGTAGGCATAATTGATGCACATGATGTTCACACAGTGAGAGTCTTAAAGATACAAAATGGTATTGTTTACATTACTAGAAAATTATTAGTTTTCCAATGGCAATAACCCATTTATGAGAGTGTTTTAGCCTACTGGAATAGACAGGGACCACATCCTCTGGGAAGCAGATAAGCATAGAACTGATACTTGATGCACACTCGTAGTGGTAACTCATCCCTAATCAGCAT…	0.38026	1925
AKAP11	FALSE	FALSE	FALSE	TRUE	AGCAAACCCCAAACCAGTATATTTTAGTATTTGTTTGGGGAGGGGAACAAGCCAATAAAGATGTTTAGGATAAAATTTGAATAGTGAATATTAACATCGTAAGTCAGTTGGGAGGCAAGTAAATATAGCTTTCTGAGCGCTTTGTGTTATCACTCGGTGTATATAGTTCATACTTTTGTAATCTGTCAAAATACTACCTTCATTTATTCTTCTATACACATGTGTAGTGTGTCAAGACCCTAAGAACATGTATTTGAAGGAAGGTCTAACCAGGGGGTTTTCAGGGGCATTGTCTGACCACATTCTTTTTGTATCCAAATAGTGCTGCTAGAAACTGCACTGAAGTGGCTGAGGATAGGTTCCAGTGATAGAGTTATAATTTTGCTCCTTTGCAAACAA…	0.330775	4039
AKAP12	FALSE	FALSE	FALSE	TRUE	AACATCATGCAGTTAAACTCATTGTCTGTTTGGAAGACCAGAATGTGAAGACAAGTAGTAGAAGAAAATGAATGCTGCTGCTGAGACTGAAGACCAGTATTTCAGAACTTTGAGAATTGGAGAGCAGGCACATCAACTGATCTCATTTCTAGAGAGCCCCTGACAATCCTGAGGCTTCATCAGGAGCTAGAGCCATTTAACATTTCCTCTTTCCAAGACCAACCTACAATTTTCCCTTGATAACCATATAAATTCTGATTTAAGGTCCTAAATTCTTAACCTGGAACTGGAGTTGGCAATACCTAGTTCTGCTTCTGAAACTGGAGTATCATTCTTTACATATTTATATGTATGTTTTAAGTAGTCCTCCTGTATCTATTGTATATTTTTTTCTTAATG…	0.351741	2843
AKAP13	FALSE	FALSE	FALSE	TRUE	CCCTCTTCCTCTCTGCTGAGGCAGCTGCCTCCTGATCCTGGCCAGCCCACCTCTCCTGCTGTCCCCGCGTGCACAAGTCTCTTACACTGGACGCCCACTGCTCCTCAGCGTCCAGTCCTCCTGGGCGGCCCCAGGTCCTGGACAATAAGCAACAGATGATATTGAGTGTCGGGTGGGGAAGGAGGCCCAGACTCTGCTTCGGCCATGATTTGTGACTGCCCAGGACTCTCAGGTTGGGCTGGCCCTACTCAGGATTACACTGAAAGTAATGGCCTCGTAAGTACAGGTGATGGTTTTGGACACGTCAGGAATTCCTAAAGGCTGAAAGAGTGTATCCAAGTAAGGTCTGAACCTCCGAATGCCTTTTATTTGGGGGAACACAAAACCAAACAGCAGATG…	0.488784	4681
AKAP14	FALSE	FALSE	FALSE	TRUE	TACTTACAGGATGTCTTAGGATTGTTTTTCTCATCAGGATACATTAAAAATACAATACAGCACGTCAAACCACAGAATATTTATTGAGTAATAAACTTGTGGCACACAA	0.321101	109
AKAP17A	FALSE	FALSE	FALSE	TRUE	TAAGTCCCCGGGAAGGAGCATGACAAGAGGCTGAGACATGTGGCAGCCCAGTCCTTACCTCATGGCTGTGAAGCTACGGGAACAGGAGCAGAAGGAGGAGAAGCTGAGGCTCCAGCAGCAGGAGGAGCGGCGGCGGCTGCAGGAGGCCGAGCTGCGGCGCGTGGAGGAGGAGAAGGAGCGCGCGCTGGGCCTGCAGCGGAAAGAGCGGGAGCTGCGCGAGCGGCTGCTGAGCATCCTGCTGAGCAAGAAGCCGGACGACAGCCACACACACGACGAGCTGGGCGTGGCACACGCCGACCTGCTGCAGCCCGTCCTGGACATCCTGCAGACCGTGTCGTCCGGCTGTGTGAGCGCCACCACGCTGCACCCCCTCGGGGGCCAGCCCCCGGCCGGTGCCCC…	0.591195	1908
AKAP2	FALSE	FALSE	FALSE	TRUE	ACTTCCTTCAACCCAGGAAGCGTCTTTGGTGCTTGGGAGACCAAGAAACCAAGAAATTAACAACTGAAAGCATTTTAATGGACTATTTATTAAAGTGCAAACAAACTCAGCAATCCTTATGTAGACCAGAAGCTGCAATATACAATGATGAAAATGAAACGAAAAGGAAGTCCCCCCATCAGACTCTGGACACCCAGGAATCAAAAGAGAAAGGACTTTTTTGGTGACTCAATCCCAGTGTCTGGTTTGGGGCCAATCTACAATGGATCCAAAAGGACAAAACATGTTACAAGCAAATCAACATAGTTGCTGCAGGCGGAACTGAGACCAGCCTCTCTGGGCGATGAAGGACAATGGTGGTAGGGCCACTTAGAGAGCAGTAGGGCCCAGGCTGGTGCA…	0.393026	4015
AKAP4	FALSE	FALSE	FALSE	TRUE	GCTGATCCTTGACTCCTCTTCATCTTAGCCCCCCTAGCAGCATTCCATCCCAGCCAGAGCACCCCCACCATCAGGCCAGTCAACTGCACAATACACAACTGTATTTCCCAATACACTTGAGCAGTTGCCTGTGAATGTAAGAGGTGTCAACAAACTGGGAAATAAAATAAAAAAAAATAATAATAAATGTGT	0.432292	192
AKAP5	FALSE	FALSE	FALSE	TRUE	CTTACTCTCCAGAGTCACGGCAGAAAAAACAAGCTTAATGAAGAATTCTTTTATACATTTGTGGCATTTCTTACTCAGTAACAAATGAGAGATTTATCATCTCTAGAACTTAAAAGGTACAATTCCAGCGCAGAAGTGCTAAAGATTAAGTCAAGTTTATAAAACTCTACCACTGAAATGCAGTCACTTCTGGATTGGAGGAAGTCAGCACAGATTGCAGTGTAAAATGACATAACATACAGGGAGTTGCTAAAATGGCATATGGAGATTGGAGTGCTTTGGGGGAGGAAGGTGTATTTATTGAGCACTTATGGTATGCCATAAGCTTTTTAATGACCTCTGATATAACAAAGTCTGGTTTCCTTTTGATAATTCAGCTCTGTGTATAGGCTAACATCA…	0.351917	4825
AKAP6	FALSE	FALSE	FALSE	TRUE	AATGTACCCCCTCCCCAAGCATGAAAATCATCTCACTGAAAGATACGCCTGGCTGCAACTCAGGGGTGGCCTCATCCTCCCGCCCTGGGCTGGCCTCTGGTTCCATCACGTTTGTCACTGCCGTTTATTACATTGACTTCTCCCAAGATGAATCTTCCTTCCAAATGTGTTTTCTCCACACAAGCCTTGTGATCTGAATGTGTGCGCTGGTTCTCTTTAGGTGATCGTCTTTGAAGTTCAGCAAAGCTGCTTGTTCTCCCATGGATTCCTGTCCCAAGCTACCTCTACCAACCCTCTCTCTCCAGCTAGACTTTTCTCTTTGCCTCCTCCCTTCCCTTCCACTCTTTAAAGTTCTGCAGTTCACCAACTGGTAGTCCATTAAATTCTCCTGTCTAGAAT…	0.359446	7876
AKAP7	FALSE	FALSE	FALSE	TRUE	GCCCGGAACGCAGGCCCCCATGTCTCTGTGCAAAGCCTCCCTGCTTCCCTCTGCTGAGTCTAGGGACTGACTTGCAGCGTGCTGTTTAAGTTAAGTTTCTCTGGTGCAATCTGTGAAGATTGCCTAATACTTTTCATGATCGATGTGTTCGCATTGCTGAAACACAACAGAAGAAAAATGGAGTGCTGGGACTGGCAGAGGAAATTAATTGATGAAAGAAGAATGGCCCAAGTTTCATTCGCCCTCAGCCACGCACAAGGGAAAGGGAACTTTGGGTTATGCCTCCTGGACGCAAATTAAAGGCCGAGAAAGAGGCCTTGCCATCAATGGAATACTGCCATTTATATTGCTTAGCAGGGCATTTGACTACTTTATCTGAGGCCAGAACTCTCACACACA…	0.353787	1809
AKAP8	FALSE	TRUE	FALSE	TRUE	CTTTGCTATTAAACAGCAGTCATAGTTTCAGGCAGTGACCTCTTGCCAAAAATCCCACACGCCCTTTTGAGAGGCTTCTGAGCAGCGCACGCCGGTCGCCATCTTCGTGGGACAGTCTCGGGACTGGCATCAGGGGAGAGAAGGAGGACGAGGACGAGGATGTGAAGAAGAGAAGGGAAAAGCAAAGGAGAAGAGACAGGACGCGGGACCGTGCAGCCGACAGAATTCAGTTTGCCTGTTCTGTATGCAAGTTCCGTAGCTTTGATGACGAAGAGATCCAGAAGCATCTGCAAAGCAAATTTCACAAAGAGACCCTGCGGTTCATAAGCACCAAGCTGCCCGACAAGACCGTGGAGTTCCTCCAGGAATACATTGTAAACAGAAATAAGAAAATTGAGA…	0.471215	2536
AKAP8L	FALSE	FALSE	TRUE	FALSE	ATATGGTGCCGCATTTGGAGACAGACATGATGCAAGGAGGCGTGTACGGCTCAGGTGGAGAAAGGTATGACTCTTATGAGTCCTGCGACTCGAGGGCCGTCCTGAGTGAGCGCGACCTGTACCGGTCAGGCTATGACTACAGCGAGCTTGACCCTGAGATGGAAATGGCCTATGAGGGCCAATACGATGCCTACCGCGACCAGTTCCGCATGCGTGGCAACGACACCTTCGGTCCCAGGGCACAGGGCTGGGCCCGGGATGCCCGGAGCGGCCGGCCAATGGCCTCAGGCTATGGGCGCATGTGGGAAGACCCCATGGGGGCCCGGGGCCAGTGCATGTCTGGTGCCTCTCGGCTGCCCTCCCTCTTCTCCCAGAACATCATCCCCGAGTACGGCATGT…	0.615551	1852
AKAP9	FALSE	FALSE	FALSE	TRUE	AGGATTGTCTAATTGGTTTAAACAGCTACGTTGACTTTAAAATAAACTGCCATTCCCCTGATAAGGTTAAGCCCATTGGATTCATTCTTTTTCTTTATTTTAGAGCTGTATGTTAAGAAAACAGTCTTTCCAATCATAAAACAGAAAATACTCTTTAGAGGAAAATCCACAATGCATGTAACTAATTATTTTTTAATCCTTTTTTAAAAAAATTGTGAGCCATAACATACAGAAAATTACAAATTGCAAATATGCAGTATGACGCATTTTTAAATGAGTATCTATGGAAACATCACCCATGTGAATATAGCCAGTATCCCAACAGCCCCTTCTCCCAAGCACATGCTCCTCTGAGTAACTTAGAGGTAATCATTGTTCTGATTTTTCTTTAGTTTTACT…	0.368143	948
AKIP1	FALSE	FALSE	FALSE	TRUE	TATTTTTAAGTTGAGATGTTCTTACACTTAAGAAGGGCACACAAGATTTTGGTTCAGTGTAAAATTAGGTTTTCTTGGTATTCTTCCTTCACTCTAAGCTTCAGGGATACTCTTTGTGCCTGAACTCATAGTTGTGGTTGGAAAGAATGTGAAGTATTCACCTCTCAGTTCCTACAGCTCAGCTGGGCTGGCACTGGGTCCTGCTGGAATTCCACCATCTGTTCAAGCAGCAGGAGGGGCACGATCCTCCTGCTAACAAAGTGAAAACCATTGCTGAAATTCCGAAACATACACATTTGGTGAGATCAGGTTCCAAAACATTTGAAGGCATTTGTTCTTATTTTCCACAAATGTTTCTCTGTAAAAACATATAATGAGTTTTTCATTTTTAGGATAAAG…	0.393568	653
AKIRIN1	TRUE	FALSE	FALSE	TRUE	AGCTTTGTCACATATCTGGGTACCAGGTTTGACCTCAAGAGATGGCTGCTGTACACTTTTTGCAACTGGTTTGATGTCACATTTCAGCTCCAACTTTGCATCCTGAGAACACTTAAACGTTTCTGCAGGTCCATTTTATACAACTTGAAAGACCGTAAAACTTTCTGGTTGCCACAAGCATATCTTTCTTTTCTGCTCATCCAATAAACAGCTGTGCCCTACTGTGATAGATTTTCCAAACAAAAATACCTGGAGCAGCAGTTTAGCAAAATATGCCTTCAGTGGCATTCAACAAATGGAGTTTCCCCAAGCACAGTTCTGTAAGAAGTGCGTGTGAGAGTGTGTGTATATGTGTGTATGTGTATTTTAAGTTATTATTTGTATTGTGCAAAAATTTTT…	0.4002	2004
AKIRIN2	TRUE	FALSE	TRUE	FALSE	ATCACGTATCCTGCATTTGTGGGCTGCCTTGTTCCTTGTTGAGTTGTTGCAAGAGGTCCCAATTATGACATGCAGCAATGCCAATACCCCTTCTGTGAATACAGGTTATTTCAAGCTTTCGTCAGTGGCAACCACTCTTAGGCAGCAGCAACTGGTTTTGGAAATTTCCCTGATGTCAGTACCACCTGGATGTGGACCTTTGCTACCTGTATTAATACCAGTGGCCTCATTTTGCTGTATCATTACAATTTGGCTTCTTATATTAATGTTTGAAAAGGATTAAAGCTGGTATTCTAGAACATGCCCTTCACTGGTTGTGTAAATAAAACTGTAGAATGACACTTCAGATGAAGTTAGTGTGATTTTAATTGTGCACTACAACCGAGCTGTAACCAGTTA…	0.407619	525
AKNAD1	FALSE	FALSE	FALSE	TRUE	CTTCACCGCTGCAGGTCCTGGAGAAACTGCAGGGACACCTTGAACTGCTGGAGCAGAACTTTCTGGCCACCAAGGACAAGCATCTGACTTTGCAGCAGCAAGTCCACAAGCACGAATCAACAATCGTTGGTGACTTTGATCCAGAAAGAAAAGTGGAAGGTGAAATCTTCAAATTGGAGATGCTGCTTGAAGATGTTAAAGAGAAAATGGATGAAAGCAAATATACTTCAGCTCCTTCCCTTCCTGTGAGTTCTCCAGTTACCCTGGATGACTTGGCCTCCACCTTCTCTTCACTCTCAAATGAGGTAATACAGCAATGTACAGTCTAATTTTGTGCCAGGAAAAATGGTGTTTTTGCATTTATAGACTCCTAATTCATGGATTCACTGAATTCCATTT…	0.391689	1131
AKR1A1	FALSE	FALSE	FALSE	TRUE	GCCTTGCCAGAGCCTCATCTGGGGAATCAGGGGGTTGAGCAGGATGGTGTTAGTAACTTATTGTAAGTCACAGCAGCAGAGCAGGATAGGAACACTCATTTGCATGCCAAGCTGAGGAGCTTGACATGGGATCTTAGCCTCTTCTGCTACAGCAGCTTAGCTGTAGCTACAGGAGTTTAACTCTGGAAAAAGGAAGGCAGTCTCACATGGTGTGTACCCCAGGGTATGCACCTGTAACCCTCCTGCTCCCTTTATTCATTTAGAAAAGGTGCTGACTTTTCTGTTGAGCACCTGGGGTTACAGTAATAAGTAAGTCTCAGCAGAAGATGTGAGAAGAGCTCACCATTAGTGCCGTGCCCTGTGCTGGAAGAAGGGTGGATAACTCCCTGAGGATGAGTT…	0.494681	564
AKR1B1	FALSE	FALSE	FALSE	TRUE	CAGTCCTGTTAGCCAAGAGGAGGAAGTGACTGAGCCTGTTACACCCTCACAGGAAGTATGGTTAGGGGTCCTCAAGTACAGAGTGGAAAGGGCACAGATCGGGGTTTTAGAAGACTCTGGCATGGGCTCTTAGATTAATAGTGCCTGCCCCCACTACTGCAAGGGTGACTGCCACGAGGGCCAGCGCTTGTTCATTCATGTGGAACCTCATCTGTACAAATGTAAGAGCTCTTAGCCGTGCAGGGAATGTTCTTTCTCCTGAGTGGTAGTGTGCATTTCTAGCCAGTGGAGGGCCTCATGTGGTCTCATGATATGCCTGAGACACTGAAGCGTGTGGCACAGTGGCTAGCGCAGGACTCTGGAGTCAGATCTGGACCTGAATGCGTCGCCTACCTGTTG…	0.505882	1020
AKR1B10	FALSE	FALSE	FALSE	TRUE	GGTTGAATCTCCTGGTGAGATTATACAGGAGATTCTCTTTCTTCGCTGAAGTGTGACTACCTCCACTCATGTCCCATTTTAGCCAAGCTTATTTAAGATCACAGTGAACTTAGTCCTGTTATAGACGAGAATCGAGGTGCTGTTTTAGACATTTATTTCTGTATGTTCAACTAGGATCAGAATATCACAGAAAAGCATGGCTTGAATAAGGAAATGACAATTTTTTCCACTTATCTGATCAGAACAAATGTTTATTAAGCATCAGAAACTCTGCCAACACTGAGGATGTAAAGATCAATAAAAAAAATAATAATCATAA	0.351097	319
AKR1B15	FALSE	FALSE	FALSE	TRUE	GGTTGAATCTCCTGGTGAGATTACACAGGGGATTCTCTTTCTTCGCTGAAGTGTGACTGTCTCCACTCAAGAACTATTTTAGCCAAGCTTATCTGAGATCACAGTGAACTTTGTCCTGTTGTAGACCAGAATGGAGGTGCTGTTTTAGACATGTATTTCTGTATGTTCAACTAGGATAAGAATATCACAGAAAAGCATGGCCTGAATAAGCAAATGACAATTTTTTCCACTTATCTGATCTGATCAAATGTCTGTTAAGCACCAGAAACTCTGCCAACACTGAGGATGTAAAGATAAATAATAAAAAATAATGACTTTAACCAACA	0.374233	326
AKR1C1	FALSE	FALSE	FALSE	TRUE	CATGGAGGGCATTGCATGAGGTCTGCCAGAAGGCCCTGCGTGTGGATGGTGACACAGAGGATGGCTCTATGCTGGTGACTGGACACATCGCCTCTGGTTAAATCTCTCCTGCTTGGTGATTTCAGCAAGCTACAGCAAAGCCCATTGGCCAGAAAGGAAAGACAATAATTTTGTTTTTTCATTTTGAAAAAATTAAATGCTCTCTCCTAAAGATTCTTCACCTACTTTGGTCTCCATAACTTCTATGTTTTCTTTCCTTCTGACACACTAGTGCCCCTAAATTGTGATTTGCCTATACGTTTAGGGCCGGGGTTGGAAGATGTTAACAACCATTTAAGATTCATTTCTGCAGTGGGAGTGGGTGGAGTTTCACCCTCTGGGAAAGGGGCAGGTGACAGG…	0.412922	5541
AKR1C2	FALSE	FALSE	FALSE	TRUE	CATGGAGGGCATTGCATGAGGTCTGCCAGAAGGCCCTGCGTGTGGATGGTGACACAGAGGATGGCTCTATGCTGGTGACTGGACACATCGCCTCTGGTTAAATCTCTCCTGCTTGGCGACTTCAGTAAGCTACAGCTAAGCCCATCGGCCGGAAAAGAAAGACAATAATTTTGTTTTTCATTTTGAAAAAATTAAATGCTCTCTCCTAAAGATTCTTCACCTACTTTGGTCTCCATAACTTCTATGTTTTCTCTCCTTCTGACACACTAGTGCCCCCAAATTGTGATTTGCCTATACGTTTAGGGCCGGGGTTGGAAGATGTTAACAACCATTTAAGATTCATTTCTGCAGTGGGAGTGGGTGGAGTTTCACCCTCTGGGAAAGGGGCAGGTGACAGGT…	0.369414	2596
AKR1C3	FALSE	FALSE	FALSE	TRUE	CATGGAGGGCTTTGCCTGATGTCTACCAGAAGCCCTGTGTGTGGATGGTGACGCAGAGGACGTCTCTATGCCGGTGACTGGACATATCACCTCTACTTAAATCCGTCCTGTTTAGCGACTTCAGTCAACTACAGCTGAGTCCATAGGCCAGAAAGACAATAAATTTTTATCATTTTGAAATAA	0.453552	183
AKR1D1	FALSE	FALSE	FALSE	TRUE	CTGCAGGGAGTTCCTGAACAGATTTTTCACTCCCACGAGTGCCAAGACGGTGCAATGGGTAGTCCCCTAGATGTGAAAATGAAGAGAGAGGGTTTTACCATCCTGAGAAGAAATAATGATGGAAACATGTTTAATGTTTGTGCAGTGTAAATGACTTTGACTCAGTCACATTGAAGTAAAAATATTAAAATCTGTTGAAATAACTCTTAGGAAATTATCAACTAATTTTTTCAGATCAGTATCTTCTAGATTCCAGACAGAAAAAAATTACACTTCAGAAAAGACATCAAAGGCAACATATGACAACAAGTAATTTATGAATCTGGGTAGTAGCGTTGGTAATCTGAGTTCTTTAAGGGTTAACAGGACAACGAAGTGCATGTGGCAGTGTGCTGGCAG…	0.391994	1324
AKR1E2	FALSE	FALSE	FALSE	TRUE	ATATGGCTCCTTCTTTTTAAAACAGAGGGAAGAATATACAGATTGAATGATTGGTGTCTGAATAGAACTAAAAATCACAAAGACTATCCTTTCCACATAGAATACTGAGGACGCTTCCCCTTCCTTGTTTCTGCTCAGCCCAGATGCACAGACACTATTGGCAATGTTGACCCTCCTCTGTCATCACAGCGCCAGGGCAGCTGTGCCTGGGACAGGAGCCACACAGTCAGAGGGGGATGTAAGAGCCACCTTCTCTGACAAATCTGGAGAATTGAGTGTGTTCTAAGTGAAGGCAATGGGGTTTCTCCAAGACAGCCTGTGTGGCCTCTACTCTGAACAAATACACTGATGAGTCATCAGTGAAATTTGCCTTCACATTTTAAGAAAACTTTATCTTAT…	0.4625	640
AKR7A2	FALSE	FALSE	FALSE	TRUE	CTGGCAAGTACAAGTATGAGGACAAGGACGGGAAACAGCCTGTGGGCCGCTTCTTTGGGAATAGCTGGGCTGAGACCTACAGGAATCGCTTCTGGAAGGAGCACCACTTCGAGGCCATTGCGTTGGTGGAGAAGGCCCTGCAGGCCGCATATGGCGCCAGCGCCCCCAGTGTGACCTCGGCTGCCCTCCGGTGGATGTACCACCACTCACAGCTGCAGGGTGCCCACGGGGACGCGGTCATCCTGGGCATGTCCAGCCTGGAGCAGCTGGAGCAGAACTTGGCAGCAACAGAGGAAGGGCCCCTGGAGCCGGCTGTCGTG	0.628125	320
AKR7A3	FALSE	FALSE	FALSE	TRUE	GCCCATCGTTTCTCAGGCTGCCCAAGGCTCTTCTGTAACATCTTTTGTTACTCACATTTTCTTTAATTTAGAACTGCCTCAGTAAATTCTTAGGGATGGAAGTATTTGGACAAAAACCTAATAGAAGAGTCACCACCAAATGAAGAATAAAACTCCCAGGGTGCTGTGTGTTA	0.398844	173
AKR7L	FALSE	FALSE	FALSE	TRUE	TCAAGCCTGGCATTTGTTTGCCCACGAATGTCCCAACTACTTCATCTAAGCTCATTGTGGCTCAGGCTGCCCAAGGCTTTTCTGTCAACTCTTTTGCTCTCTCCCGCTTTGTCTAATTTAGAACTGCCTCACTAAATTCTTAGGGATGGAAGTATTTGGAAAAAAACCTAACAGTAGAGTCACCACCTAAGGAAGAATAAAATCTCCCAGGGTGCTGTGTGTTAGTCTGTTTGCGTTGCTATAAAAGAATACCTGAGACTGGGTCATGTATAAAGAAAAGAGGTTTCTTTGGCTCACAGTTCTGCAGTCTGTACAAGAGGGTGTGGTGCCGGCATCTGCTCTTGGTGAGGGCCTCAGGAAGCTTAGAATCATGGCAGAAGGGGAAACGGAGCCAGCGTG…	0.42575	1367
AKT1	FALSE	FALSE	FALSE	TRUE	GGCGGCGGTGGACTGCGCTGGACGATAGCTTGGAGGGATGGAGAGGCGGCCTCGTGCCATGATCTGTATTTAATGGTTTTTATTTCTCGGGTGCATTTGAGAGAAGCCACGCTGTCCTCTCGAGCCCAGATGGAAAGACGTTTTTGTGCTGTGGGCAGCACCCTCCCCCGCAGCGGGGTAGGGAAGAAAACTATCCTGCGGGTTTTAATTTATTTCATCCAGTTTGTTCTCCGGGTGTGGCCTCAGCCCTCAGAACAATCCGATTCACGTAGGGAAATGTTAAGGACTTCTGCAGCTATGCGCAATGTGGCATTGGGGGGCCGGGCAGGTCCTGCCCATGTGTCCCCTCACTCTGTCAGCCAGCCGCCCTGGGCTGTCTGTCACCAGCTATCTGTCATC…	0.550403	992
AKT1S1	FALSE	FALSE	FALSE	TRUE	AGTCCAGGGAGGGAGCGCCCCGGGCCGCGTCCGCCCCGTCCCACACTACGCCCCCGCCCCACTCCCGGGGCCTGCTAATCTGAGGCCGATCCGGGACCGGCCTCCTTGCGTCTCCCATTCCCAAGATTGTCCCGCCTCTGCCAATCCCCGCCGTCCTTCCAGCCCACGACCTGCCGCGCCGAGGAGCGGCATCTGTCCCGTTTCCCGATTGGGTCTGTCGTCTCTCTCCGCCTAGCGACAGATTCCTTCTATTAAGGGATTGGCTCGCTGAGTTCTAAGCTCTAAATGGGTCAACTCCTTTGTTTTCCGCCTAGCGACAAGGGATTTGCTCGCACGGCATTGGCTCCATCCCCTAGTCGCTGGACAGCTCTTTTTTTGATTGGCTCAAATCCTGTAAAG…	0.608597	884
AKT2	FALSE	FALSE	FALSE	TRUE	GCAGTCTGCCCACGCAGAGGACGCACGCTCGCTGCCATCACCGCTGGGTGGTTTTTTCCCCCTAACTTTTTACTTAGCCTTTTTGGTTTGTGTCCCCACCCCCACCTCCTCACCCCCTTTCCAGTTCTTCTTCAGGCCCCTCCCAGACGCACCCCAGCGGCCCCTGCAGCCCCTGCCTCCAGCCTCCAGCCTCACCTTTGTGCCCAGACTCGCATTTGGAAGACTCCACCTCCCGCCCAGGCCTGGGCTGTTGGGCGGTTGGAGATTCAGGTTTTAATCCACACAAGCCCCAGTGAGGGGTGAAGCATGGCGCCTGGGGCCTGCCTGAGTTTCTGGCCTGGGTGTCGTGCTGGTGTCTGCCTCCGCGCTGCTGCATCTGGACGAAGGCTGCCTTCTGGT…	0.568495	3555
AKT3	FALSE	FALSE	TRUE	FALSE	GTCTCTTTCATTCTGCTACTTCACTGTCATCTTCAATTTATTACTGAAAATGATTCCTGGACATCACCAGTCCTAGCTCTTACACATAGCAGGGGCACCTTCCGACATCCCAGACCAGCCAAGGGTCCTCACCCCTCGCCACCTTTCACCCTCATGAAAACACACATACACGCAAATACACTCCAGTTTTTGTTTTTGCATGAAATTGTATCTCAGTCTAAGGTCTCATGCTGTTGCTGCTACTGTCTTACTATTATAGCAACTTTAAGAAGTAATTTTCCAACCTTTGGAAGTCATGAGCCCACCATTGTTCATTTGTGCACCAATTATCATCTTTTGATCTTTTAGTTTTTCCCTCAGTGAAGGCTAAATGAGATACACTGATTCTAGGTACATTTT…	0.396817	5529
AKTIP	TRUE	FALSE	FALSE	TRUE	GAGATGGTGAATCTGGTGCACCATGCACTTTCCTGCTAGACTCTGGCCTAGTTCAAGCTGACCAATGGCAGAGGACTGCCTGAAGAGTAAAACTGTGTGAACAATGACTGACTGCCAGTGTTTTCCATGTATGCATAGGTTCTAACAGCAGGGTTTGGAAACCTGTCTCTAAGTAATGCATTACTTCTGTCAGAAGTGTCTTAGGGTGGTTATCTAGTTCAGTACTCCAAATTATTGGGGACCTTGAGGCTTAAGTAAGTATTTTTCTGAATATAATGCTAAAGGTAAGTTGCATTCATTTAAACTAATAGAGCAGACAGAATTCAGCACTACTTAATAGTTTATAAATCAGTGGTTTCAGTTGTATATATGTTAGGAAATGGAGAGGTATAGAGAGAG…	0.323615	1372
ALAD	FALSE	FALSE	FALSE	TRUE	TGGAGACAGTGCCAGGCCCAAGAACTAGAACTTTAAAACGTTCCCGGGGCCTCAGACAAGTGAAAACCAAAGTAAATGCTGCTTTTAGAACTGTGCCCTCATGCCCTCTTCCTGCTCACATGCTAGCGGGGCCCAGCAGCCCTGGGTGGTTTTGCCAGCATGCTAACTCTTGTAACTCGCAGCTGCATCCTATGAGCTCTCCCAAGCTTCCCCGCCCCTCCCCTGGGTCAGCCGTGAGGCCCACCTTTGCCACCCTCAGCTCTTTCCTCTGGTGTGGCTTCAGCTTGAAAGCAACCTGGAGTCGGGGGCACAGCCTTTGGGGCCTGGCTGGGAGAGGGTCTTGGAGCATTAGGGGAAGAAGAGAGCAGTGGGATCTTGGGGCCTGAGAAGCCTTGGAAC…	0.473525	1983
ALAS1	FALSE	FALSE	FALSE	TRUE	GCATGACCTCAATTATTTCACTTAACCCCAGGCCATTATCATATCCAGATGGTCTTCAGAGTTGTCTTTATATGTGAATTAAGTTATATTAAATTTTAATCTATAGTAAAAACATAGTCCTGGAAATAAATTCTTGCTTAAATGGTG	0.306122	147
ALAS2	FALSE	FALSE	FALSE	TRUE	GTGAGTGGGAACGTTCCTACTTCGGGAACATGGGGCCCCAGTATGTCACCACCTATGCCTGAGAAGCCAGCTGCCTAGGATTCACACCCCACCTGCGCTTCACTTGGGTCCAGGCCTACTCCTGTCTTC	0.581395	129
ALB	FALSE	FALSE	FALSE	TRUE	CTCGCCTGAGCCAGAGATTTCCCAAAGCTGAGTTTGCAGAAGTTTCCAAGTTAGTGACAGATCTTACCAAAGTCCACACGGAATGCTGCCATGGAGATCTGCTTGAATGTGCTGATGACAGGGCGGACCTTGCCAAGTATATCTGTGAAAATCAAGATTCGATCTCCAGTAAACTGAAGGAATGCTGTGAAAAACCTCTGTTGGAAAAATCCCACTGCATTGCCGAAGTGGAAAATGATGAGATGCCTGCTGACTTGCCTTCATTAGCTGCTGATTTTGTTGAAAGTAAGGATGTTTGCAAAAACTATGCTGAGGCAAAGGATGTCTTCCTGGGCATGTTTTTGTATGAATATGCAAGAAGGCATCCTGATTACTCTGTCGTGCTGCTGCTGAGACTTG…	0.424146	1259
ALCAM	FALSE	FALSE	FALSE	TRUE	GAGAGAAACTGTCCTAGTTGTCCAGAGATAAAAATCATATAGACCAATTGAAGCATGAACGTGGATTGTATTTAAGACATAAACAAAGACATTGACAGCAATTCATGGTTCAAGTATTAAGCAGTTCATTCTACCAAGCTGTCACAGGTTTTCAGAGAATTATCTCAAGTAAAACAAATGAAATTTAATTACAAACAATAAGAACAAGTTTTGGCAGCCATGATAATAGGTCATATGTTGTGTTTGGTTCAATTTTTTTTCCGTAAATGTCTGCACTGAGGATTTCTTTTTGGTTTGCCTTTTATGTAAATTTTTTACGTAGCTATTTTTATACACTGTAAGCTTTGTTCTGGGAGTTGCTGTTAATCTGATGTATAATGTAATGTTTTTATTTCAATT…	0.327889	2449
ALDH16A1	FALSE	FALSE	FALSE	TRUE	GATGATGTGGAGGATTTGCCCTGCCCTGGCTGTGGGCTGCACCGTGGTGGCCCTCGTGCCCCCGGCCTCCCCGGCGCCCCTCCTCCTGGCCCAGCTGGCGGGGGAGCTGGGCCCCTTCCCGGGAATCCTGAATGTCCTCAGTGGCCCTGCGTCCCTGGTGCCCATCCTGGCCTCCCAGCCTGGAATCCGGAAGGTGGCCTTCTGCGGAGCCCCGGAGGAAGGGCGTGCCCTTCGACGGAGCCTGGCGGGAGAGTGTGCGGAGCTGGGCCTGGCGCTGGGGACGGAGTCGCTGCTGCTGCTGACGGACACGGCGGACGTAGACTCGGCCGTGGAGGGTGTCGTGGACGCCGCCTGGTCCGACCGCGGCCCGGGTGGCCTCAGGCTCCTCATCCAGGAGTC…	0.684449	1987
ALDH18A1	FALSE	FALSE	FALSE	TRUE	AAAGAGCCAGGAAAACCCGGGAATTTTCCAAAAGGTCTTCACGTTAAACTTGTCTTATCTCAGGAGAGAGCCCGCTCTTGTCTCCCAGTTCCTGGTAGGGTCTGCCTGTTGGAAAGTGTACCTGGATGCTTCTGGGCTCCGTTTGGCAATAGCAGTCTTGGCTGATGTGCACAGTCTGGCTCCCAGCTCACCCTTTTTTTTTAAAGTAAGAAAATAGTTGCTACCGATAGGGACTTTGCCAAGTCCAATTATCTTCTAGGATTGAAAGGTGCATTTTCCCCATAAAAAAGGCGAGGAAAACCCATGGCTGCTTTGTGTCACCTCAGTGACTTACAGTCCCCCTTGGCATTTAGTTGGTACTAGAGCCAGTCATCCTTAACAAATCTTTTCACATTTTAT…	0.417767	833
ALDH1A1	FALSE	FALSE	FALSE	TRUE	AGAAAATACAAGAGTGGAGAGAAGCTCTTCAATAGCTAAGCATCTCCTTACAGTCACTAATATAGTAGATTTTAAAGACAAAATTTTTCTTTTCTTGATTTTTTTAAACATAAGCTAAATCATATTAGTATTAATACTACCCATAGAAAACTTGACATGTAGCTTCTTCTGAAAGAATTATTTGCCTTCTGAAATGTGACCCCCAAGTCCTATCCTAAATAAAAAAAGACAAATTCGGATGTATGATCTCTCTAGCTTTGTCATAGTTATGTGATTTTCCTTTGTAGCTACTTTTGCAGGATAATAATTTTATAGAAAAGGAACAGTTGCATTTAGCTTCTTTCCCTTAGTGACTCTTGAAGTACTTAACATACACGTTAACTGCAGAGTAAATTGCTC…	0.31685	546
ALDH1A2	TRUE	FALSE	FALSE	TRUE	AAATTGGACTTGCTGGCAGAATCCTTTTTGGGAGAAGATGAAGAATCAGTGTGAGACTGTTTGGTTAAAATCCCCAATAAAACTGAAACTGATCTTTATAAACAACGAGTGGCAGAACTCAGAGAGTGGGAGAGTGTTCCCTGTCTATAATCCAGCCACAGGAGAACAGGTGTGTGAAGTTCAAGAAGCAGACAAGGCAGATATAGACAAAGCAGTGCAGGCAGCCCGCCTGGCTTTCTCTCTTGGTTCAGTGTGGAGAAGGATGGATGCTTCAGAAAGGGGACGTCTGTTGGATAAGCTTGCAGACTTGGTGGAACGGGACAGGGCAGTTCTTGCAACCATGGAATCCCTAAATGGTGGCAAACCATTCCTGCAAGCTTTTTATGTGGATTTGCAGGG…	0.465268	2908
ALDH1A3	FALSE	FALSE	FALSE	TRUE	AGGAAAGGCGGGGCTCCTTCCTCAAACATCGGACGGCGGAATGTGGCAGATGAAATGTGCTGGAGGAAAAAAATGACATTTCTGACCTTCCCGGGACACATTCTTCTGGAGGCTTTACATCTACTGGAGTTGAATGATTGCTGTTTTCCTCTCACTCTCCTGTTTATTCACCAGACTGGGGATGCCTATAGGTTGTCTGTGAAATCGCAGTCCTGCCTGGGGAGGGAGCTGTTGGCCATTTCTGTGTTTCCCTTTAAACCAGATCCTGGAGACAGTGAGATACTCAGGGCGTTGTTAACAGGGAGTGGTATTTGAAGTGTCCAGCAGTTGCTTGAAATGCTTTGCCGAATCTGACTCCAGTAAGAATGTGGGAAAACCCCCTGTGTGTTCTGCAAGCAG…	0.398813	1853
ALDH1B1	FALSE	FALSE	FALSE	TRUE	GAGCAGCTGTCAGGGAGGCCCAGTCACAGTCCAGCAATTCCACAACCACCTTGACGAATGCTTGCCAAGCTGTTTTAAAGCCAAGAACACCCTTTCTTTGTTCCAAATTAACTCTTAGAAGAAACCCCACAAATAAAGCAATTCAATCAAGGCTGTTCTATTTAAATCAGAGATGGGGACCAGGCTCAGAGTTCTACCTATCTAACCCCCAACCACAGCCCCCTTGGTGGCCCATGAGTTGCTTCCATGAAATCTTAGGAGTCTCTGGAGGACAGATTAAAAACCAGTGATCTGTAATTTGTAGCTCTTCCTGCTGATCCAAGGACTTTCCCATGGGTGCGCTTGATGGTTTAGTGGATCGACTCAACTCAGAACACAAGCTTGGAAAGTGTTAGGGGT…	0.426784	1359
ALDH1L1	FALSE	FALSE	FALSE	TRUE	CAGAGGAGGAGACCGGAGAGGAGAGCCAGTCCAGTCAGGGCCCAAACATCACACCAGAGGCTCTAACAGAGAACTGAATACAAAGAAGTGTTCCTTGGGTATTGAAGAGTGGAAGGCAGAGAGCCCAAAGTTATTGGGGACAGCGACTGCAGGAAGCAGCTGCCACTGTCTGGAAGCTGAGAAGGATGGAGTGCCGGTATTCAAGTACTCCCGGTGGCGTGCAAAAGGACAGGCTTTGCCTGATGTGGTGGCAAAATACCAGGCTTTGGGGGCCGAGCTCAACGTCCTGCCCTTCTGCAGCCAATTCATCCCCATGGAGATAATCAGTGCCCCCCGGCATGGCTCCATCATCTATCACCCGTCACTGCTCCCTAGGCACCGAGGGGCCTCGGCCATCAA…	0.579401	1971
ALDH1L2	FALSE	FALSE	FALSE	TRUE	AGCAACACCATCATCAGGAAAGCCTTGACAGACAGCCCTTTACAACTCTGGACACACTTAAGAAGATTGGGTGTGTTGAGGCAGGAGGTGTCAGCCACAAACCAAAAAATACACAGATGGACCATGAAGAGGGCCAGGCCATGTTAAAGCATTTACACATGTGCCTGAGTATTTTCTAATACACCTTCCAGTGATTTGGAGTTGTTGCATTTTGACTATGTTGTATATCATACGTATTTCTAAAATACCAAGCTGTTTCTCCCCTACCTAGACAAATCTATTCATGGTTCCCATCTTGAAGATGTCAGTACCATGCAGTTATAATACACAAGGTGCATTTATTGGAAACTTTGTATAATATGTACAGGTTTTTAACCTCTGAACTATACATAGGGGGTT…	0.387786	4634
ALDH2	FALSE	FALSE	FALSE	TRUE	GAATCATGCAAGCTTCCTCCCTCAGCCATTGATGGAAAGTTCAGCAAGATCAGCAACAAAACCAAGAAAAATGATCCTTGCGTGCTGAATATCTGAAAAGAGAAATTTTTCCTACAAAATCTCTTGGGTCAAGAAAGTTCTAGAATTTGAATTGATAAACATGGTGGGTTGGCTGAGGGTAAGAGTATATGAGGAACCTTTTAAACGACAACAATACTGCTAGCTTTCAGGATGATTTTTAAAAAATAGATTCAAATGTGTTATCCTCTCTCTGAAACGCTTCCTATAACTCGAGTTTATAGGGGAAGAAAAAGCTATTGTTTACAATTATATCACCATTAAGGCAACTGCTACACCCTGCTTTGTATTCTGGGCTAAGATTCATTAAAAACTAGCTGC…	0.453105	7954
ALDH3A1	FALSE	FALSE	FALSE	TRUE	GGCCTCTGATGAATGATGAAGGCCTGAAGGTCAGATACCCCCCGAGCCCGGCCAAGATGACCCAGCACTGAGGAGGGGTTGCTCCGCCTGGCCTGGCCATACTGTGTCCCATCGGAGTGCGGACCACCCTCACTGGCTCTCCTGGCCCTGGGAGAATCGCTCCTGCAGCCCCAGCCCAGCCCCACTCCTCTGCTGACCTGCTGACCTGTGCACACCCCACTCCCACATGGGCCCAGGCCTCACCATTCCAAGTCTCCACCCCTTTCTAGACCAATAAAGAGACGAATACAATTTTCTAACTCAGCAAA	0.597403	308
ALDH3A2	FALSE	TRUE	FALSE	TRUE	GACGTAGAACCAGAAGATAGAGGTTGAAGGATCTCTATATTGTTATTAATGGTGGTGTTGAGGAAACCACGGAGCTCCTGAAGCAGCGATTTGACCACATTTTCTATACGGGAAACACTGCGGTTGGCAAAATTGTCATGGAAGCTGCTGCCAAGCATCTGACCCCTGTGACTCTTGAACTGGGAGGGAAAAGTCCATGTTATATTGATAAAGATTGTGACCTGGACATTGTTTGCAGACGCATAACCTGGGGAAAATACATGAATTGTGGCCAAACCTGCATTGCACCCGACTATATTCTCTGTGAAGCATCCCTCCAAAATCAAATTGTATGGAAGATTAAGGAAACAGTGAAGGAATTTTATGGAGAAAATATAAAAGAGTCTCCTGATTATGAAA…	0.419737	3040
ALDH4A1	FALSE	TRUE	FALSE	TRUE	GCCCCTCTCGGGCTCCACCGTCCAGCTGTCTGTCCGTCCAGGTGGCCGACCTCACTGCACAGACCCCACTCCAGCCCCTCCACCCCTTCTTCATGCACAGCTGCCTTTCTATAATCCGGGCTTGACTCCCTTCTTACCACTGTATTCTGGCCTCTCCCATGCCTCAGGCTCTGGTTTGAGATCGTGCTGGGGAGGAACATGGCCACTACCCCTTATCCCATCGGCCATGTGGGAGGTATGACCCTGGTGCCTGGCAGGTTCTCCCTCTGCCCTCCACTGGGCCCAGTGGCTCAGGGACCTGGGGAAAGGAGATGGAGCAGCTCTTGGGATCCTTTGGGGAAAAGGAGGCCATTCTGGGCCCCTTGGCAAACCTCACCACTCACAGAGGCTCCTGGCCTT…	0.595895	1413
ALDH5A1	FALSE	TRUE	FALSE	TRUE	GATTCTTTGGTTCTTTAAAAAAATTTAAAAGGAGACTTATCTACATATATAGGTACATGCCATCCATTATTTTAAATAAACTAATAGGTTTTCAGAATTATGAATTTTTCAGAACTCATCCAGTCCTTGTAATCTTAAACAGATGCAAATCCTACCCCTGCCCTTAATGTAACTAGGGACCAATATGTGCCACGTGCCTGTGGCTGCAGACTCCCAGAGAACCAGCACTGGGTTTACAGAATGAGGCCCTGGCTCCCCACCACAGCCCCAGCTGCCTCAGAGCAGGCACAGCACAAGGCAGGCCCAGCCCCATGGGCCGTCACAAAGGCTTGATCACTGCCTGGGCAGTGGCACAACCATCCCCCATGTCGCTACAGAACATGGGCCCAGAGCACCTTG…	0.428612	3495
ALDH6A1	FALSE	FALSE	FALSE	TRUE	AAACAAGTTTGTTTAAGACTGACTCCATCCTGAGTAATCTCCCTTTATTTTTGACCAGCTTCATTTGTCAGCTTTGCTCAGATCAGATCGATGGGATTGGAATACATTGTAACTAAAATCTTCCTCAGGACTATTAACCCCCGCAAAGTTTCTATAGGGAACTGCCTAGTGTAACAATGAAACCAGATTTCTCACTTGCTCTTCATACTTCTATTTTGAGGTAACTGTTGTAACTATGAAATGCTTATCTGAAAGTAGTGCTTAAACCTGATTTCTAAAAATTATCCCATTTTCTGATGATTTGAAGGGGAGAAAAGCCAGTGTATGTAAAGAAAATGTTCCAGCCAGGCGCGGTGGCTCACGCCTGTAATTCCATCATTTTGGGAGGCCACAGTGGGC…	0.397679	3792
ALDH7A1	FALSE	FALSE	FALSE	TRUE	AGGTGTTTTAGATGAACATCCCTTAATTTGAGGTGTTCCAGCAGCTGTTTTTGGAGAAGACAAAGAAAATTAAAGTTTTCCCTGAATAAATGCATTATTATGACTGTGACAGTGACTAATCCCCCTATGACCCCAAAGCCCTGATTAAATCAAGAGATTCCTTTTTTAAAAATCAAAATAAAATTGTTACAACATAGCCATAGTTACTAAAAGATGAGTTAGGTGGATTTTTATTATGTCAACTAGTTGTACATGGCTTTTTAAAAGTTAATGATTATTTTGTAATTAGAAAAAAATAGTACGTACCAGGGTAGGAATTTGGGAAAATACAGAACCGAGGAGAAAACAGAAGTCTTTGCAGTAGATACAGGGTGTCTCCTGACCAAGTGAAGGATTCAG…	0.426056	3124
ALDH8A1	FALSE	FALSE	FALSE	TRUE	CTGGTCTGATCAGCCCCTGGAATTTGCCACTCTACTTGCTGACCTGGAAGATAGCTCCAGCGATGGCTGCAGGGAACACTGTGATAGCCAAGCCCAGTGAGCTGACTTCAGTGACTGCGTGGATGTTGTGCAAACTCCTGGATAAAGCAGGTGTTCCACCAGGTGTGGTCAATATTGTGTTTGGAACCGGGCCCAGGGTGGGTGAGGCCCTGGTGTCCCACCCAGAGGTGCCCCTGATCTCCTTCACCGGGAGCCAGCCCACCGCTGAGCGGATCACCCAGCTGAGCGCTCCCCACTGCAAAAAGCTCTCCCTGGAGCTGGGGGGCAAGAATCCTGCCATCATCTTTGAGGACGCCAACCTGGATGAGTGCATTCCGGCAACCGTCAGGTCCAGCTTTG…	0.523767	1115
ALDH9A1	FALSE	TRUE	FALSE	TRUE	AAACCTGCAGTGAAACCTATTGACATGGCCACGCTGTGGAATGATGTGAATTGGCCCTGTTTACAGAGGCAGTACAACTGAATGTTATTTTACATCCAGAATTTTGGCGTTCAGTATAAGAGAATGGTTCATGTTACTCTTTCTCTCTCCATCAGCTTCCTCACTGAAAATGTGCATTAAGTGCCTTGTAGATACTAATCAAGAAAGCTGTGATTCTCCTCAAAGCGTATTTTTGTGAAATCTTTTAAGAGCCAGTAACATACTTCTAGAGAACAGGAAAAGAGACTAGGATAATACATCTTCCACACATTTGGCCCACTGATAATGTTAATTCTCTGGCGTATTTCAAAGAACTTGTTCCTGGCTGATCCAAGTGCAGTGGTATTTACAACTAATTGA…	0.378897	834
ALDOA	FALSE	FALSE	TRUE	FALSE	GCCAACAGCCTTGCCTGTCAAGGAAAGTACACTCCGAGCGGTCAGGCTGGGGCTGCTGCCAGCGAGTCCCTCTTCGTCTCTAACCACGCCTATTAAGCGGAGGTGTTCCCAGGCTGCCCCCAACACTCCAGGCCCTGCCCCCTCCCACTCTTGAAGAGGAGGCCGCCTCCTCGGGGCTCCAGGCTGGCTTGCCCGCGCTCTTTCTTCCCTCGTGACAGTGGTGTGTGGTGTCGTCT	0.635593	236
ALDOB	FALSE	FALSE	FALSE	TRUE	GGTCCAATGCCCGCCAGCCTAGCTCCAGTGCTTCTAGTAGGAGGGCTGAAAGGGAGCAACTTTTCCTCCAATCCTGGAAATTCGACACAATTAGATTTGAACTGCTGGAAATACAACACATGTTAAATCTTAAGTACAAGGGGGAAAAAATAAATCAGTTATTGAAACATAAAAATGAATACCAAGGACCTGATCAAATTTCACACAGCAGTTTCCTTGCAACACTTTCAGCTCCCCATGCTCCAGAATACCCACCCAAGAAAATAATAGGCTTTAAAACAATATCGGCTCCTCATCCAAAGAACAACTGCTGATTGAAACACCTCATTAGCTGAGTGTAGAGAAGTGCATCTTATGAAACAGTCTTAGCAGTGGTAGGTTGGGAAGGAGATAGCTGCA…	0.362307	1231
ALDOC	TRUE	FALSE	FALSE	TRUE	GTATCCACTCCATACCACAGCCCTTGGCCCAGCCATCTGCACCCACTTTTGCTTGTAGTCATGGCCAGGGCCAAATAGCTATGCAGAGCAGAGATGCCTTCACCTGGCACCAACTTGTCTTCCTTTCTCTCTTCCCTTCCCCTCTCTCATTGCTGCACCTGGGACCATAGGATGGGAGGATAGGGAGCCCCTCATGACTGAGGGCAGAAGAAATTGCTAGAAGTCAGAACAGGATGGCTGGGTCTCCCCCTACCTCTTCCAGCTCCCACAATTTTCCCATGATGAGGTAGCTTCTCCCTGGGCTCTCCTTCTTGCCTGCCCTGTCTCCTGGGATCAGAGGGTAGTACAGAAGCCCTGACTCATGCCTTGAGTACATACCATACAGCAAATAAATGGTAG…	0.523114	411
ALG1	FALSE	TRUE	TRUE	FALSE	TCCTCGGTTCTAACCGCCCCGGGGAGTCGAGGCGGAAGTGCTCCTTTAGTCGCCGCCTTTGGGCAGCTCTCCGAGATTAGACGAGCGGTTCTGCCCCAGCCTTTCCTGGACTCCAAACCCCATGATGAGCTCTTGCAGAACAACAGAATTCAGATTGTGGGGTTGACAGAACTTCAGAGTCTTGCAGTTGGGCCCCGAGTTTTCCAGTACGGAGTCAAAGTTGTACTTCAGGCTATGTACTTGCTGTGGAAGTTGATGTGGAGGGAGCCAGGTGCCTATATCTTTCTCCAGAACCCCCCAGGTCTGCCTAGCATTGCTGTCTGCTGGTTCGTGGGCTGCCTTTGTGGAAGCAAGCTCGTCATTGACTGGCACAACTATGGCTACTCCATCATGGGTCTG…	0.56455	1433
ALG10	FALSE	FALSE	FALSE	TRUE	TATCAGTGATATTTCGAACTGTGAAAATGGACTTAATAATTAGACCATTTCTACAAAGAACAACTGAATAGGTGGAAAACATGGAATTTCTTTTAGGTGCAGTGGTGGTCTTCAAATTACATTAGTTTTTTTTATATATATTTTAAACATATGTAAGAAATTAAGTGGCAAAGAACTGAGAAAGCTTAAGACCTGCTTCAAAAGCCTGAAAAATGGAAAAATAAAATTGTTTTCAGATATCTCATATCACTCTCATAATGTTGGCCCCTTAAAAAGCTTGGGAATGTTTTGTATGTACAAGTTTATTAAAACTGGGTATGCTTCATATTACTGGAATGAATTTATTCTCTTCAGAGAGAAATATTAGGTTAGTGCAAAAGTAATTGTGGTTTTTGCCAT…	0.334535	1387
ALG10B	FALSE	FALSE	FALSE	TRUE	TATCAGTGATATTTTGAACTGTAAAAATGGACTTAATAATTAGACCATTTCTACAAAGAACAACTGAATAGGTGGAAAACATGGAATTTCTTTTAGGTGCAGTGGTGGTCCTCAAATTACATTAGTTTTTTTAATATATATTTTAAACATATGTAAGAAATTAAGTGGCAAAGAACTGGGAAAGCTTAAGACCTGCTTCAAAAGCCTGAATAATGGGAAAATAAAATTGTTTTCAGATATCTCATATCGCTCTCGTAATGTTGGCCCCTCACAAAGCTTGGGAATGTTTTGTATGTATAAGTTTATTAAAACTGGGTATGCTTCATATTACTAGAACTAATTTATTCTCTTCAGAGAGAACTATTAGGTTAGTGCAAAAGTAATTGTGGTTTTTGCCAT…	0.314504	8515
ALG11	FALSE	FALSE	TRUE	FALSE	ATTAGTACCAGTAGAGTGGGGTGCTGCTGAAGAGATACCCAAAAATGTGGAAGCGACTTTGGAACTGGGCAACAGGCAGAGGCTGGAACAGTTTGGAGGGCTCAGAAGAAGCCAGGAAAATGTGGGAAAGTTTGGAACATCCTAGAGACTTGTTGAATGGCTTTGAACAAAATGCGGATAGTGATATGGACAACGAAATCCAGGCTGAGGTGGTCTCAGATGGAGATGAAGAACTTGTTGGGAACTGGAGAAAGGTGACTCCTCTTATGTTTTAGCAAAGGTACTAGAGGCATTTTGCCCCTGCCCTAGAGATTTGTGGAACTTTGAACTTGAAAGAGATGATTTAGGGTATCTGGTGTAAGAAATTTCTAAGCAGCAAAGAATTCAAGAAGTGACTTG…	0.489373	1882
ALG12	FALSE	TRUE	FALSE	TRUE	GGGGGACCAGGCAGCCCTCAGCAGCCACAGGCCTTCCAGGAGCTGTTATCACTACCAGTTTCTGGCACAATTCCAGCACAATTATGACAATTCAGAGAAGCAAGTCAAAGGACTGGGCACCTGCCTCTGACAGACACCAGACCAGGTCCAGGGCCTCCTCCACAGCCTCAGCTGGGGCTCTCAGCACCAAAGAACGAGGGGCCCAGGTCTTGTTGGCACCCCGGGAGCCACTGCCCAGGGTGATGGTGGCCAGCTCAGGGCTTCCTGCGGGTGACTGTCGCCCAGACCAGGTGCCATTCATGACTAATCAGGAGCAGCGGGCTCACCCAGGCACCTGTCTGCCAGGAGGCCACGTGTGTCCTGCCCACCCAGGGGGAGCTGTATTTTGGCAGCACCCCA…	0.534774	3609
ALG13	FALSE	FALSE	TRUE	FALSE	TCACGCAGGTGCAGGAAGCTGTTTGGAGACTCTGGAAAAAGGAAAGCCACTCGTAGTGGTTATAAACGAAAAGTTGATGAACAATCATCAGCTGGAACTGGCAAAGCAGCTACACAAAGAGGGTCATCTCTTCTATTGTACCTGCAGGGTCCTGACTTGTCCTGGGCAAGCCAAGTCCATTGCTTCTGCTCCTGGGAAGTGCCAAGATTCTGCAGCGCTGACTTCAACTGCCTTTTCAGGCCTAGACTTTGGGCTGCTTTCCGGATACCTGCATAAGCAAGCCCTTGTTACTGCTACCCATCCTACCTGCACCCTGCTTTTTCCCTCTTGCCACGCTTTTTTTCCTCTCCCTCTTACCCCCACCCTGTACAAAATGCATAAAGGATGGAAAAACTACTG…	0.423592	3586
ALG14	FALSE	FALSE	TRUE	FALSE	CAAATGGCAACTGACTTCTTTAGAATTTTGCAGTTAACAGTAGTATGTACTCAAATTGGGGGGAAAAAAACCCTACATGTTTCTTGTAAAGGCGTCTGACAGTCCTGAGAATTATTGATGGTAAGGAATAAAAAATGTACAGATGACTCAGTGAAGAAACTGAGGCTTCTCTTATGAAACAAACATTGATAAACGTAACTACTAAATGTTTATGCCTCTGTAAACCAAATTTCTTTTCTAGATAAAAATATGTATTACTACCTGCAAATTTTCTTCTGGCTGTTTTAGTAGTATTTTTTTTACAGAACTAAATATAGAGTTTGTATGATTAGTAATATTTCCTGTCCTACAGCTTTTTTTTTTTTTTTTTTTTTTTGTAAAGTATTCTGCATTGTAAAA…	0.41435	8669
ALG1L	FALSE	FALSE	FALSE	TRUE	GCAGCGCCTCCCAGTGGCCAGAAGCTGAAATGACGGCAGTGGTGCCGCCTGGTGAATGAATTGGTTCTGTGACCCGG	0.61039	77
ALG2	FALSE	FALSE	TRUE	FALSE	AAACGCCAAGCTGAATATATCATGCCCCTATTAAAACTTGTACATGGCTCCCCATTGGTTTTTGGAGAAAAGTTCAAGCTTTTTACCTTGGTGTCTGCCTGTATCCCAGTGTTCAGGCTGGCTAGACGGCGGAAGAAGATCCTATTTTACTGTCACTTCCCAGATCTGCTTCTCACCAAGAGAGATTCTTTTCTTAAACGACTATACAGGGCCCCAATTGACTGGATAGAGGAATACACCACAGGCATGGCAGACTGCATCTTAGTCAACAGCCAGTTCACAGCTGCTGTTTTTAAGGAAACATTCAAGTCCCTGTCTCACATAGACCCTGATGTCCTCTATCCATCTCTAAATGTCACCAGCTTTGACTCAGTTGTTCCTGAAAAGCTGGATGACCTA…	0.393043	2501
ALG3	FALSE	FALSE	FALSE	TRUE	TCTATCACCAGACCTGCAAGGTACCTCCCTTCGTCTTTTTCTTCATGTGCTGCGCCTCTTACCGTGTCCACTCCATCTTTGTGCTGCGGCTCTTCAATGACCCAGTGGCCATGGTGCTGCTCTTCCTCAGTATCAACCTCCTGCTGGCCCAGCGCTGGGGCTGGGGTTGCTGCTTTTTCAGCCTGGCAGTCTCTGTGAAGATGAATGTGCTGCTCTTCGCCCCTGGGTTACTGTTTCTTCTCCTCACACAGTTTGGCTTCCGTGGGGCCCTCCCCAAGCTGGGAATCTGTGCTGGCCTTCAGGTGGTGCTGGGGCTGCCCTTCCTGCTGGAGAACCCCAGCGGCTACCTGTCCCGCTCCTTTGACCTTGGCCGCCAGTTTCTGTTCCACTGGACAGTGA…	0.574141	1106
ALG5	FALSE	FALSE	FALSE	TRUE	GTTGTTTGCAGTCTTCAGTTGTGTTCTTATGCTTCAGTGTCACATTTCATTTCATTTGAAACTAAAATTTTAAGTAAAGCTGAAATAAACTTCTTGTCATTGTCTGCCTTTTGATAATTTTAAAGAAATAACTTTCCATAAGTAAAAAATTATATATCTCTTTGGAT	0.269461	167
ALG6	FALSE	TRUE	FALSE	TRUE	CTGTATTCCTAAACAAATTGTTTCCTAAACAAATGTGAAAATGTGAACAGTGCTGAAAGGTTTTGTGAACTTTTTGCTATGTATAAATGAAATTACCATTTTGAGAACCATGGAACCACAGGAAAGGAAATGGTGAAAAGTCATTGTTGTCTACACAAAATAAATGTATATGGAGACCAAAGACCAATGGAGGCTTGTCTAAGTACTGCTTGGCCAAAACATGTGGTTTTATTATTCACAGCTATTCAAGTGGGGAAAAAAGAGAAACATGTCCTTAATCCCATTGTTTACTCAGGAAATGCACTTTTTAAATGTCTTTAAAAAACTGAGAAATATTTCTTGATATTTGCTTTGTCTAAACCTACTTCCTTCATCAGACCATATAGTGAGCTTCATGGG…	0.311933	1542
ALG8	TRUE	FALSE	TRUE	FALSE	GTGCTGTAAATGCATTGATGGAAAAAAAGTGGGTAAAGAACTTACAGAAAAGCCAAAATTTATTCTGTCGGTATTACTTCTGTGGAACTTCGGGTTATTAATTGTGGACCATATTCATTTTCAGTACAATGGCTTTTTATTTGGATTAATGCTACTCTCCATTGCACGATTATTTCAGAAAAGGCATATGGAAGGAGCATTTCTCTTTGCTGTTCTCCTACATTTCAAGCATATCTACCTCTATGTAGCACCAGCTTATGGTGTATATCTGCTGCGATCCTACTGTTTCACTGCAAATAAACCAGATGGGTCTATTCGATGGAAGAGTTTCAGCTTTGTTCGTGTTATTTCCCTGGGACTGGTTGTTTTCTTAGTTTCTGCTCTTTCATTGGGTCCTTT…	0.417836	1211
ALG9	FALSE	FALSE	FALSE	TRUE	AAATCCTGGTACTGGATGGCTGTGATAAGCTGTTCTCCACACTCTGGCCTGGCATCTGAGAACTAGCAAGCCTCTCTTAGGCCATATGGGCTTCTCCACCAAAGCTGTTTGGCAGCTCCTAGCAGACCTTCTTATTGAAATCCTCATGCTGAAAATGAACACAGCCTAGTTGCCAACCCACATGTCCTTTTCACCTCCAGCAAGACTAAGCTTCTTTAAAGCACTTCACAGGACTAGGACCCTGTCCTGGAGCTATCTCAGGAAAAAGGTGACCATTTGAGGAACTGTGACCTAATTTTATTATAATGATGCCTCTAATTTTCATTTCCTTTACAACCAACTGTAACTATAAGGTTGTATTGCTTTTTTGTTCAGTTTTAGCATGCTATTTTTTGAATT…	0.410409	3862
ALK	FALSE	FALSE	FALSE	TRUE	GCACATAGCGGTGTACCGCCGGAAGCACCAGGAGCTGCAAGCCATGCAGATGGAGCTGCAGAGCCCTGAGTACAAGCTGAGCAAGCTCCGCACCTCGACCATCATGACCGACTACAACCCCAACTACTGCTTTGCTGGCAAGACCTCCTCCATCAGTGACCTGAAGGAGGTGCCGCGGAAAAACATCACCCTCATTCGGGGTCTGGGCCATGGCGCCTTTGGGGAGGTGTATGAAGGCCAGGTGTCCGGAATGCCCAACGACCCAAGCCCCCTGCAAGTGGCTGTGAAGACGCTGCCTGAAGTGTGCTCTGAACAGGACGAACTGGATTTCCTCATGGAAGCCCTGATCATCAGCAAATTCAACCACCAGAACATTGTTCGCTGCATTGGGGTGAGCCT…	0.528143	2132
ALKBH1	FALSE	FALSE	FALSE	TRUE	GACTTGGAGATCCCATCCTTTTTACTCAGGCACCTGCTTACCGTAAATGATCATGTTATTGTGTATTGCCGTGGACTTCAGCACCCAGACAAGCCAAAAACAGAGACAGGGAAGAACTCATTGTTGATCACACTGTTGCCTTGGAACCCACGCAGAAGTAAACTCAGCCACTTTGCTCAGAGAAGTGTTTGACATGGTCTGTTCCTAGTTACATGTTGGCTGTAATGTATGTTGAGAAGTCAGTCCAAGGAGGTATGTTCTTCCACAACAGCCTTCTCAGCCTCTGCTATTTCCTTTGAGGAAGGTAGAAGTGAGTTTCCATGTTTGCAGAGTATTTAAATACCTCAGATTTTATTAATGAGAAATACAGTACCCCTCCCTCCACTCCATCTGGTAATT…	0.383523	1408
ALKBH2	FALSE	FALSE	FALSE	TRUE	CACCCTGTTTAGTGGACTCAATGTTACAAGTCTTCTGTCTCCTCCAAAAGGAAGTGTTTAGGGTTCCACCCTATTTGGTTCATTGGTACAAATCATTTCTTAGTACACTGGGGCTCTAAGAGTGGAATAGCGCCAGCACTCGGTCTTCCTGGATCCTGGAGCTCATCCCGGAGTAGGAAGTGAGAGGTGATTAACTCCTGAACAAACAGCTGAATGAGATAATTTCTTCTTCTCTTTTTCTTTCTTTTTTTTTTTTGAGACAGGGTTTTTCTATGTTGCCCAGGCTTGGTCTCAAACTGCTAGGCTCAAGCGATCCTCCCACCTCAGCCTCCCAAAGTGCTGGGATTACAGGCGTGAACGACTATGCCTGACCCTAGACGATTTC	0.45974	385
ALKBH3	FALSE	FALSE	FALSE	TRUE	GAATATTCAGTTTTTGGCACCCTGTGCTGCGCACACTAAAGAACCGCATTGAAGAGAACACTGGCCACACCTTCAACTCCTTACTCTGCAATCTTTATCGCAATGAGAAGGACAGCGTGGACTGGCACAGTGATGATGAACCCTCACTAGGGAGGTGCCCCATTATTGCTTCACTAAGTTTTGGTGCCACACGCACATTTGAGATGAGAAAGAAGCCACCACCAAGAATGGAGACTACACATATGTGGAAAGAGTGAAGATACCCTTGGATCATGGGACCTTGTTAATCATGGAAGGAGCGACACAAGCTGACTGGCAGCATCGAGTGCCCAAAGAATACCACTCTAGAGAACCGAGAGTGAACCTGACCTTTCGGACAGTCTATCCAGACCCTCGAGG…	0.479042	668
ALKBH4	FALSE	FALSE	FALSE	TRUE	TGCTGATCGAGGACTTTGTGACCCGGGAGGAAGAAGCCGAGTTGGTGCGGCTCATGGACCGTGACCCCTGGAAGCTCTCCCAGTCTGGACGGAGGAAGCAGGACTATGGCCCCAAAGTCAACTTTCGGAAACAGAAGCTAAAGACCGAGGGCTTCTGCGGCCTCCCCAGCTTCAGCCGGGAGGTGGTGCGGAGGATGGGCCTCTACCCGGGGCTGGAGGGCTTCCGGCCCGTCGAGCAGTGCAACCTGGACTACTGCCCCGAGCGGGGCTCTGCCATTGACCCCCACCTGGACGACGCCTGGCTGTGGGGGGAGCGGCTGGTCAGCCTCAACCTCCTGTCCCCCACCGTGCTGTCCATGTGTCGGGAGGCGCCCGGGAGCCTGCTCCTCTGCTCGGCCC…	0.608487	1249
ALKBH5	TRUE	FALSE	FALSE	TRUE	GTCTACCCGCCGCCCTCCTGGGAACTCTGGCTCATCCTTACGTAGTTGCCCCTCCTTTTGTTTTGAGGGTTTTGTTTTTGTTCATTGGGGGGTTTTTGTTTTTTGTTTTTTGTTTTTTTTGATTCTATATATTTTTCCTTGGTTTTGTTGCCTGTTAGGGCTGAAGAATAGAATTGGCCAGGACCTAGGTTCTCATATTCTTGGTATTCCTCCTGGATGGAAAGGCTGTTGGCATCAATAGGGGACAGAGGCTGATGCTGGAGTGGCCAGTAGAGGTGGTGGAGCAGAGCAGCCATCTTTTAAGTGGGGCTGTATCAGGCTGGGTTTATTTAAAAGCAACAAAATGTTTTGGTTAAGAAAATTATTTTGCTTTCAGTGTAAATCTTCGCAGTGTTCTAA…	0.483954	1558
ALKBH6	FALSE	FALSE	FALSE	TRUE	CTTCATCTCCAAAGAAGAGGAGGAGTATTTGCTTCGACAGGTTTTTAATGCCCCAAAGCCAAAGTGGACCCAGCTCTCTGGGAGAAAGTTACAGAACTGGGCCCCACGAGGACGGACCACTGTACTACCCGACTGTCAGCACCATCAGCCTGGGCTCCCACACCGTGCTGGACTTCTACGAGCCGCGGCGGCCAGAGGACGATGACCCTACAGAACAGCCTCGGCCTCCGCCCCGGCCCACCACCTCGCTACTGCTGGAACCGCGCAGCCTGCTGGTGCTCCGCGGCCCCGCCTACACGCGTCTTCTCCACGGCATCGCCGCCGCCCGCGTAGACGCGCTGGACGCCGCCTCCTCGCCGCCCAATGCGGCAGCCTGCCCGTCGGCGCGGCCGGGAGCCT…	0.640553	651
ALKBH7	FALSE	FALSE	FALSE	TRUE	CCCCCAGCTTTCTACAGACACCAGATTTGTGAATAAAGTTGGGGAATGGACAGCCTAACTGGGACATTGCAGTGGCTGCTTGCTGGGGCCGGGATTTGCAGGGGAACCCAGGATGGCACTGGCCCATAGGGAGCTCCAGGTGTGGCTGGCTGGACACATGGTCAAAGTCACAAGGCCGGGAGAGTGGTGTCCTTTATTGCACTCACTGCTGGTCGCCCCAGCCCACTCCCCTCCTCGTTGTCTCTGCATCCAGGTCTCCAATAAATAAGTCAGCCGAG	0.568345	278
ALKBH8	FALSE	FALSE	TRUE	FALSE	TTATTTACCTGAACACATCATATATAAAGAAGAAATGCTCACTTAAAAAAAAAGAGAGAATAAATTAATTACCCTTTTAATTAAAGAGAAAACTTGTGGGAAAGTACCAAAGGAAAGCTGAGAAAAATTTGGAAGTAGGGATTCATTAGGAGACATTCAAATGTCTCCTGTTGGCTGACATCACAGATGTGGTGTTGGCTCCTCCTACTTCCCTAGGAGAGGTGGTTTCTAAAAGTGATTGAAGCAGTTTGTGCAGTGTTTGTAATTCTTGGGTAAGAGCCCAGGATTTTGAAGATAATAGTTTTTTAGTAAAGTGCTACTAAATGTAGTAAATCATGTAGGATTTTAGGGATGTAATTATATGTTAATACAGAAAATAGTCCTGGTCAATAGAAAATT…	0.333851	1932
ALLC	FALSE	FALSE	FALSE	TRUE	CACACACAAAGCCCCGGTGTCGGACACACAGCAGTAATTTCCCAGTCATAGTCTTCTTTTCAAATGTTTTGAACACCTGGTGATTTAATAAAGTGGTCGTCTCACAAA	0.425926	108
ALMS1	FALSE	FALSE	TRUE	FALSE	AAAATTGTCATCTGATGCAGTCACTCAGATAACAACAGAAAGTCCAGAAAAGACCCTATTTTCATCTGAGATTTTTATTAATGCTGAAGATCGTGGACATGAAATTATAGAGCCTGGTAACCAGAAGCTACGCAAAGCTCCTGTCAAGTTTGCCTCATCATCTTCAGTCCAACAGGTTACTTTTTCTCGCGGCACAGATGGCCAGCCTTTATTATTGCCATATAAGCCTTCTGGTAGTACCAAGATGTATTATGTTCCACAATTAAGACAAATTCCTCCATCTCCGGATTCCAAATCAGATACCACCGTTGAAAGCTCCCATTCAGGATCCAATGATGCCATTGCTCCAGACTTCCCAGCTCAGGTGCTAGGCACAAGAGATGATGACCTCTCAGCCAC…	0.425542	2122
ALOX12	FALSE	FALSE	FALSE	TRUE	GCCCTAGAGTGACTCTACCTGCAAGATTTCACATCAGCTTTAGGACTGACATTTCTATCTTGAATTTCATGCTTTCCTAAAGTCTCTGCTGCTAAGGCTCTATTTCCTCCCCCAGTTAAACCCCCTACATTAGTATCCCACTAGCCCAGGGGAGCAGTAAACTTTCTCTGCAAAGACTAGATCCTTTTTTACGCTTTGCAGACCGCATAGTCACTGTCTCAACTACTCAGCTCTCCTGCTGCAGCATGAAGGCAGCCACAGACAACATGGAAATGAGTGTGACTATGTTCCAATAAAACTTTATGGACACTGA	0.447284	313
ALOX12B	FALSE	FALSE	FALSE	TRUE	GAGCGCGCTTCCCGTCTCTCCTCTCCCCATTCTGTGCCCTACTATTTTCAACAAAACAAAACAAACAAGCAAAAAACACAAAAACCTCAGAGACCAAAACACCAAACAAACAAAAAAACAAAAAACCTTCCTTTC	0.4	135
ALOX15B	FALSE	FALSE	FALSE	TRUE	ATCCCAGGGGAACACAGGCCCAGATGACATCCCTTTGACCACATCGCTCTAGGATAACTGGCACCCAGAGAAAAGGACTCCTCAGAAAAAACAGGCCCCCATGTGCCTCTCCTGGGACAACCAGACTCTGTAACTCACCCCCACCACCATACACACACACAAAAACAGAAACAAAATCAAAACAGAGAAAGCAGAAAATCTACCAAGAACAGAGTCTCAGGACAGAACCACTGAGTCTTTTGGAGGCTCCAAGCCTCAAAGTGCCCGCAGAGCCCACCTTGAGGGTTTTGCTAGTTGGTTTTGTTTTGCGTTTTACAGCCGTGGGGGGAAGCACATAATCCCGCCCCAGGGCCCACTAGCATCCACTGATTGGACCTTATGGTCACCCAACTCAAGGAC…	0.502636	569
ALOX5	FALSE	TRUE	FALSE	TRUE	TATCCAGTTTGATAGTGAAAAAGGAGTGGACTTTGTTCTGAATTACTCCAAAGCGATGGAGAACCTGTTCATCAACCGCTTCATGCACATGTTCCAGTCTTCTTGGAATGACTTCGCCGACTTTGAGAAAATCTTTGTCAAGATCAGCAACACTATTTCTGAGCGGGTCATGAATCACTGGCAGGAAGACCTGATGTTTGGCTACCAGTTCCTGAATGGCTGCAACCCTGTGTTGATCCGGCGCTGCACAGAGCTGCCCGAGAAGCTCCCGGTGACCACGGAGATGGTAGAGTGCAGCCTGGAGCGGCAGCTCAGCTTGGAGCAGGAGGTCCAGCAAGGGAACATTTTCATCGTGGACTTTGAGCTGCTGGATGGCATCGATGCCAACAAAACAGACCC…	0.567213	1525
ALOX5AP	FALSE	FALSE	FALSE	TRUE	CTCTCTGCTGAATATGGGGTTGGTGTTCTCATCTAATCAATACCTACAAGTCATCATAATTCAGCTCTTGAGAGCATTCTGCTCTTCTTTAGATGGCTGTAAATCTATTGGCCATCTGGGCTTCACAGCTTGAGTTAACCTTGCTTTTCCGGGAACAAAATGATGTCATGTCAGCTCCGCCCCTTGAACATGACCGTGGCCCCAAATTTGCTATTCCCATGCATTTTGTTTGTTTCTTCACTTATCCTGTTCTCTGAAGATGTTTTGTGACCAGGTTTGTGTTTTCTTAAAATAAAATGCAGAGACATGTTTTAAGCTGA	0.409375	320
ALOXE3	FALSE	FALSE	FALSE	TRUE	CCACCCCCAAATACCACCCAAGAAGAAAGAAAGGTCCAAGCATGAGGAGGACCAGTTCCTCAGGTCCTCCAGACCCTTCCATCCTCCCTGTTCTCAGTTCACCTGAACCTTCTCTTCTGCACATGGAGACTTTTGCAGCCAAGATGGCTCTGACATCATACAAACTGGGCCCTGAGCTGTGAGAGACCAGCACAGCAGCGTCCAGGTTAAAAGCCGCTGACCAAAGTCCAATGCACAATAGCCCCTCCGAAAGGAAGGAACCGCTTCACTTCTTGCCCCACTTGGGGCAGCCTCTTGTTCCAGCCTCTTGGAATGCCCAGCTTGGGTTTCTGAGCTTTTCTCCCTCATCCTCCCCAATCCCCAAACTCCTTCTCCTACCATGCCTTTCTACGTTCTCTT…	0.519945	727
ALPI	FALSE	TRUE	FALSE	TRUE	GGAGGAGAACCCGGCCTTCTGGAACCGCCAGGCAGCTGAGGCCCTGGATGCTGCCAAGAAGCTGCAGCCCATCCAGAAGGTCGCCAAGAACCTCATCCTCTTCCTGGGCGATGGGTTGGGGGTGCCCACGGTGACAGCCACCAGGATCCTAAAGGGGCAGAAGAATGGCAAACTGGGGCCTGAGACGCCCCTGGCCATGGACCGCTTCCCATACCTGGCTCTGTCCAAGACATACAATGTGGACAGACAGGTGCCAGACAGCGCAGCCACAGCCACGGCCTACCTGTGCGGGGTCAAGGCCAACTTCCAGACCATCGGCTTGAGTGCAGCCGCCCGCTTTAACCAGTGCAACACGACACGCGGCAATGAGGTCATCTCCGTGATGAACCGGGCCAAGCA…	0.631197	1654
ALPK2	FALSE	FALSE	FALSE	TRUE	CGTCCCTGGGTAACCTAATGGCCACTGGCTAGCAGCACACAATCTCGCCAGGGAAAATCTGAGGCCACACAGGAGAGAATATACAGCCTGCAGAGAGTGCGTGGCAATCCTTACTCCCAGCCGACTGTGCGCCAAGATGCTTCTAAACCCATCACCTGCTGTCTTCACTCAAATGATTTCAGAACAGGATTTGCGACCAGGTTTATGGGGAGATTGAATCAACGATTGGTCTCAAAGACAGTCCATTCTTTATATACATGTTTAGCATTTTTACCAACCTCACATCATGTGTATATTTGTGTATTTGCACATGGTTGTGCTGTCGAGGACCTGGTGCTGAGAAGAGTCTGTTCACAGCCAAAATTCTTCCCACTGTCATTCCTAACCTGGGATTTCTAG…	0.442708	576
ALPK3	FALSE	FALSE	FALSE	TRUE	CCTCCGCAGAGGCTGGGGGCCTCCACCCAGCAGCAGACCAACCAGGAAGCAGCTTGAACTGGATGGAGACTTTCCAAATATGGAACTAACTGGAGAAGGTGCACGAAGGAGACACCACTTGGGGACCTCTCTGAGCAGGCTCTCGTGAATCAGCTCGTCATCAGATGGCTTTGGTGCATGGCACATAGCCCACTGGCCTCTTCTGGTGCCACTGTCACCCAGGGCTCCCGGGCCTCAAGCAGTCCCCACCTCCAAGTGCCTGGCAACCTAGGCCCTCCTTGAAGTTTACACTTTGCCACTGCTGGAGGCTCCCCTGAGTCCTCTGCATGAGTTCTGCACCCCAAGCCCTTGCCCCAGCCCAGTCCAGCAGCAGATGTTACAATCTGAGTGAGGACATGC…	0.511341	5026
ALPL	FALSE	FALSE	FALSE	TRUE	GGGCCCAGGGCCCGGGCACCCACAAGCCCGTGACAGATGCCAACTTCCCACACGGCAGCCCCCCCCTCAAGGGGCAGGGAGGTGGGGGCCTCCTCAGCCTCTGCAACTGCAAGAAAGGGGACCCAAGAAACCAAAGTCTGCCGCCCACCTCGCTCCCCTCTGGAATCTTCCCCAAGGGCCAAACCCACTTCTGGCCTCCAGCCTTTGCTCCCTCCCCGCTGCCCTTTGGCCAACAGGGTAGATTTCTCTTGGGCAGGCAGAGAGTACAGACTGCAGACATTCTCAAAGCCTCTTATTTTTCTAGCGAACGTATTTCTCCAGACCCAGAGGCCCTGAAGCCTCCGTGGAACATTCTGGATCTGACCCTCCCAGTCTCATCTCCTGACCCTCCCACTCCCA…	0.573298	764
ALPP	FALSE	FALSE	FALSE	TRUE	GTGTCCCGTCCCTGGGGCTCCTGCTTCCCCATCCCGGAGTTCTCCTGCTCCCCACCTCCTGTCGTCCTGCCTGGCCTCCAGCCCGAGTCGTCATCCCCGGAGTCCCTATACAGAGGTCCTGCCATGGAACCTTCCCCTCCCCGTGCGCTCTGGGGACTGAGCCCATGACACCAAACCTGCCCCTTGGCTGCTCTCGGACTCCCTACCCCAACCCCAGGGACTGCAGGTTGTGCCCTGTGGCTGCCTGCACCCCAGGAAAGGAGGGGGCTCAGGCCATCCAGCCACCACCTACAGCCCAGTGGGTACCAGGCAGGCTCCCTTCCTGGGGAAAAGAAGCACCCAGACCCCGCGCCCCGCTGATCTTTGCTTCAGTCCTTGAATCACCTGTGGGACTTGAGG…	0.584095	1094
ALPPL2	FALSE	FALSE	FALSE	TRUE	GTGTCCCGTCCCTGGGGCTCCTGCTTCCCCATCCCGGAGTTCCCCTGCTCCCCACCTCCAGTCGTCCTGCCGGACCTCCACCTGGAGCTGTCACCCCCGGAGTCGCCACACAGACGTCCTGCCATGGAACCTTCCCCTCCCGGTGCACCCTGGGGACCGAGCCCTTGACACCACGCCCTTTGCTTTATCTTGCTCTTGAAATTTTGGCCCCAACTCCAGGGACTGGGGATTTGTGCCTGGCAGCTGCCTGCATTTCAGGAAAAGAGGAGGCTCAGACCATCCAGCCCCCGCCCATATCCTGAGGTGGATCAGGCAGGCTCTCTCCCCGGGGACATGAGGCACCCATACCTAGGACCCCCTGCGCCTTTTTTAGCTTCAGTCATGGCAGCACCTGAGGGA…	0.60095	842
ALS2	FALSE	FALSE	FALSE	TRUE	ATGTTTGGGAGAATTCACCAATGAAGTCTTCTGGGCCTAAGCATTACTTTGGAACACTGACTATGCCAAATGGAGACTACATTGAAGGTTATTTTAGTGGAGAATGGGGATCTGGGATAAAAATCACTGGAACCTACTTCAAACCTAGTCTATATGAGAGTGATAAAGACAGACCTAAAGTTTTCAGGAAGCTAGGAAACCTGGCAGTGCCAGCTGATGAGAAGTGGAAAGCGGTGTTTGACGAATGTTGGCGCCAACTGGGCTGTGAGGGCCCAGGCCAAGGGGAAGTTTGGAAAGCATGGGACAATATTGCTGTGGCCTTGACCACCAGTCGGCGCCAGCACAGAGACAGTCCAGAAATACTGAGTCGTTCACAGACTCAGACACTAGAGAGTTTGG…	0.460969	1486
ALS2CL	FALSE	FALSE	FALSE	TRUE	AATGGCCGGATGGGCGGAATCACGTGGGGAATTTCTGCCAGGGCCTGGAGCATGGCTTCGGCATCCGCCTGCTGCCCCAGGCCTCTGAGGACAAGTTCGACTGTTACAAGTGTCACTGGCGAGAAGGCAGCATGTGTGGCTACGGCATCTGTGAGTACAGCACCGACGAGGTGTACAAGGGCTACTTCCAGGAGGGCCTGCGGCACGGATTTGGGGTCCTTGAGAGTGGTCCGCAGGCCCCCCAGCCCTTCAGGTACACGGGCCACTGGGAGAGGGGCCAGAGGAGCGGCTATGGCATTGAGGAGGATGGTGACAGAGGTGAGCGCTACATTGGCATGTGGCAGGCTGGTCAGCGCCACGGCCCAGGGGTCATGGTCACCCAGGCAGGTGTCTGCTACC…	0.580011	3562
ALS2CR12	FALSE	FALSE	FALSE	TRUE	GAATGAAGAAATTTGTGAAGGATGTTCTGGGAGATTGGCCTCTATTACTGTTTCTAAGGATGATTCTGACACTGTGCAAGATGGTAGCAAGAAAGGACAAGAATCATAAACAAAAAGTTGCTCTGCATTGTTGAAGATGGTTGGCACACCATTTCTGTAGGCCCAGGAAACTCCTGGGAGGGTTTTCTTGAGAAAATGCATATAATGAGTTTAGTTCTTGGGTTGCTCTGACTCTCTGAATGTCTGAAAATGTTTGAATTCGCATCTGAATTTCACAGCTTATCACGGACTCTTCACTGAAAAATGATGCTCTCCATACTGGGAGCTGAGCTTTCTCTGAGTTTTGTACTATTTTTCTTCTACCTTGACGTATTTCGTTAGAAAGAAACTGATTTGAAG…	0.397059	408
ALX1	TRUE	FALSE	FALSE	TRUE	CATACAGTACTCTTTTATTTTTCTTTTAATAGCAAAGTTAAACATTCTTATTTCTCATATTTAAAGGATACCACAATAAGCTGCTGTGTGTGGAATTGCTAAAGGTCAAGATATTCAGTGAGACCAGCTTAAATGAATAGTTGTTATTTAACATTAAAATCTAAGAATGAACCTCTGAAAAGACTAAATAGGTTTACCATGTGCCAGTCTCCACAAACCCTGTTTTAGTAGTAAGGTTTTCTTTTTCTATTGTACAAGTCAATGAAATATGATCACGCAACTTATTAAAGAATAAATGTGTTAAACAAA	0.297735	309
ALX3	FALSE	FALSE	FALSE	TRUE	TCGGTTGCATGGACCTGCAGAATGAGCTGCCCACCTCTTTTTCCATTCCCAGTCGCTCCCAGCCCACCTCTGCCTCCAAGCCCCAGATGGTTCTGGAGGCTGCGAGAGCAGCTGGCACTGTCAGCCCCCAGCAGGGAACACGTTACAGGGTCTTTTCTCTTAGAACAAGGTGGGGCTGCCTAGGAGAAGGGGCTTCGAAGCAGCCAGGACTCTTCCTACCACAAACTGAGTCCCCTCACCTGAACTCTGGGCTGGAGGCAGGGAGACACTGCCCTGCTTCCTCCAGACTTTGTCCAAGTCCATTGTCATCTCTCCAGCTAAGACAGCTTACTTGGCTCATCGTTCAGGGAACCCAGGAAAATGGGAGGAGAACGCCGCGTGGACTGAAGCTCTTCATGA…	0.554804	739
ALX4	FALSE	TRUE	FALSE	TRUE	CAGGGCACCCCTGCCCCGTCCCCACCTCGGGACACCATGGGCCACGCCCATGTTTTCCAGGCCCCCAGCCTCCCACTCGACTTTCCTCTTAGGAACCTGGCCTGGGCCAGGGGCCTGACCCTCAGCACTTTCAGCCGCCCCAAGTCTGAGGCCCCGTGGACTGCTGGGAGGGAGGGGGCAGCAGGCCCCTGGCCCCTCCCTGGCACTGAGGCCCTGACCCCTGCTCCCGGCCACAGGCAGTGGAGAAAGCCAGGTGGCCACGTTTTTCAGCTTCGCATCCATGATAAGCTGAAAGCGCTTTCTTGCTCCCGCCCACTCCTCTGCTCTGCCTAGTTGACCATGAGTCAATGCTAGATTTCCATGCAGACCCAGCAGCCTCACCAGCCCAGTCTTGTCCAT…	0.55805	4410
ALYREF	TRUE	FALSE	TRUE	FALSE	ACAGACCAGCAAATCCGCGTGCGGAACAGGACCCAGGCGTCTCCTCTTGCTCCCTGGTTGGGGGGCGGTGGCTGGGGCTGTGCGGCCAATGATGGATTTGTTTCTTTTATGTTTTAAAATAGGATTTAAAAACTCATGTAAAGGTTTTTTTTTTTTCTTTTTTTTTTTTTTTAATTCTGAAACAGACCTGTTTTGTACCGAGTTATTTTTGGGATAAATTTTACTGGTTGCTGTTGTGGAGAAGGTGGCGTTTCCACCTTTTCCATAATAAAATAGAAATGTGTGTA	0.400697	287
AMACR	FALSE	FALSE	FALSE	TRUE	CTTCCAGGCCCACGGCTCAAGTGAATTTGAATACTGCATTTACAGTGTAGAGTAACACATAACATTGTATGCATGGAAACATGGAGGAACAGTATTACAGTGTCCTACCACTCTAATCAAGAAAAGAATTACAGACTCTGATTCTACAGTGATGATTGAATTCTAAAAATGGTTATCATTAGGGCTTTTGATTTATAAAACTTTGGGTACTTATACTAAATTATGGTAGTTATTCTGCCTTCCAGTTTGCTTGATATATTTGTTGATATTAAGATTCTTGACTTATATTTTGAATGGGTTCTAGTGAAAAAGGAATGATATATTCTTGAAGACATCGATATACATTTATTTACACTCTTGATTCTACAATGTAGAAAATGAGGAAATGCCACAAATTGT…	0.398971	2915
AMBN	FALSE	FALSE	FALSE	TRUE	CAGCTCTAAGATATTAGCTACTTTCTGTATGCACAAGCTTCCCAGCTTTGTCCCCACAGTGTACCTTTTTGCTAAAACACTTATTACCCTTCTGCAGCAAAGGCATTAAAAGCGCTAAGCATATATTAATAAATGCAAGTGGCTAGAAATAGTGTAGGTCCCCTTCTTGCTTTCAATATCTTGTTGAAATAAAATGTGTCAATTGTCTCTGTGATTTAGAAACACTATTAATAACATCAGAGCAAGGTTCTAAGGGTCTCAGCATTTGATCATCACTTTTTCTTAGCTGTCTTAAGCATTATAGAATTTCTCTTACCAGCATGACACTATTATATTCAGGAAACATGGCACTGCTTTTTTCTCTAAGCAAAGGCAAATATCCTCATAATTCTAAGCTAA…	0.324373	558
AMBP	FALSE	FALSE	FALSE	TRUE	GTGAATGTGTCCCTGGGGAGCAGGAACCAGAGCCCATCTTAATCCCGAGAGTCCGGAGGGCTGTGCTACCCCAAGAAGAGGAAGGATCAGGGGGTGGGCAACTGGTAACTGAAGTCACCAAGAAAGAAGATTCCTGCCAGCTGGGCTACTCGGCCGGTCCCTGCATGGGAATGACCAGCAGGTATTTCTATAATGGTACATCCATGGCCTGTGAGACTTTC	0.547511	221
AMBRA1	FALSE	FALSE	FALSE	TRUE	AGACAAACGTTGCACTGGTGCCTCCCCTCGAACCGCCAAGCAGAAACCGGACCTCACAGCTGACTGGGAACTGGACATGTGGAAGAGCTGCTGGCTGCATCAGGGAACAGGAGGAGGAAGAGGGTCAGGGTGGAGAGGAAGATCAGTCAGTGGGCACAAGACAGTCAAATGGGCAAGGCCTGCCTCGGGGAACTAGAACCTTCCAGGATCTGGAGCCCGGGAGAGCCACACTGTGGGCTTAATGTGAATAGAGGAACAAGTGGGTATCTCTGCCAGGCACCCCACTTTCTCCTAGTAACATGGGCTCAGGGGACTCAGCCCTGGACAGAGAGCCTCCAGAGAGTGAACAGTCTTCCAGATCTGGGCCAATCATCCTGGACAGAGGCCCGCGAGGCAGCT…	0.548263	1036
AMD1	TRUE	FALSE	TRUE	FALSE	CTGTTGGTACTTATATACTCTGGATTTCCCAGAGAGTCGGGTAATCAGTCAGCCAGATCAAACCTTGGAAATTCTGATGAGTGAGCTTGACCCAGCAGTTATGGACCAGTTCTACATGAAAGATGGTGTTACTGCAAAGGATGTCACTCGTGAGAGTGGAATTCGTGACCTGATACCAGGTTCTGTCATTGATGCCACAATGTTCAATCCTTGTGGGTATTCGATGAATGGAATGAAATCGGATGGAACTTATTGGACTATTCACATCACTCCAGAACCAGAATTTTCTTATGTTAGCTTTGAAACAAACTTAAGTCAGACCTCCTATGATGACCTGATCAGGAAAGTTGTAGAAGTCTTCAAGCCAGGAAAATTTGTGACCACCTTGTTTGTTAATCA…	0.3605	2638
AMDHD1	FALSE	FALSE	FALSE	TRUE	GCGCGCCCGGCGGGAGCTGGACATCGGCATCTCGGCTACCTACTGCGGGGCTCATTCAGTGCCTAAAGGAAAAACTGCTACTGAAGCTGCTGATGACATCATCAATAACCACCTCCCAAAGCTGAAGGAACTTGGCAGAAATGGGGAAATACACGTGGACAATATAGACGTATTTTGTGAGAAAGGTGTCTTTGATCTCGATTCCACCAGAAGGATTCTTCAACGTGGAAAAGATATAGGGTTACAGATTAACTTCCATGGGGATGAACTCCACCCGATGAAGGCTGCTGAGCTTGGGGCTGAACTGGGAGCGCAGGCAATCAGCCACCTGGAAGAAGTGAGTGATGAAGGCATCGTTGCCATGGCAACGGCCAGGTGCTCTGCCATCCTTCTGCCCAC…	0.401726	1506
AMDHD2	FALSE	FALSE	FALSE	TRUE	CAAGGACCTCGGCTGAGAGGACACCTGGCCGCAGCGGGATGCCATCAGGGCCGGGTGGTTGGGGAGCTGGTCTCCAGGGAGTGAGTCGGGAGCCCTGCTGGATTGATGCCCAGGGCCTGTGCGGCCGCCCTGGAGGCGGTGGCTGGGATAAACGTGCACCCAGCAGGACTCGCCTTGGCTCCGGGTTTTGCTTGTGCTCACATGTGGCACCATCCTTGGTTGCCCTCCTGGAGAAGGCATTCACGGCCTGGGGTGGGATGGCTGGGCTGTAGTTTAGCCTGGGCCTTGGGCCCCAGTGGGGGACAGGGCCTGTCTGCATGAAGTGGACCGGAGACCTGCAGACCCCAGGAAAGTGTCACTATGGGAGGGAGGGGCAGGCAGTCAGTGGCTGGTGCCATG…	0.622916	1859
AMELX	FALSE	FALSE	FALSE	TRUE	AAGATCAGAAGATGAGAGGGGAATGAATACTTCAGATGCTTTCAGGAGTGACACAAGAACACAATGATTTTTGCTTATAATCACTTTACTTAGCAAATTCTGTAACTAAAAAAGTACCATTAGCAGACAATAAAATGCATTAAAAATCA	0.315436	149
AMER1	FALSE	FALSE	FALSE	TRUE	TTATTATCAATTCTGGAGTAGGGACACGGGGCCTGAGCATGTGAATGGGGATCAGGGGTTGGGCAGAAGGGTGGGGGGGTGGGGGTTGTTGTTTAACTTGAAAACCCTTTGGGCCAAGGAAAACTCCTGTGAGTTTTCACCTTGGTTTTCCCACTTGCCTCTTCTGCCATCTATGGCCACGTTCAACTCAAGTGCATCTGCCCAGGGAGGCTGCTGCTGCTACTGCACTCCAGTTTTTGCTTTCGAGGTTTCTTCTTGTGACCCACGCTGGGTTTGGGATGCTGTAATTTTGTGCCTATTCCAGTTGCCAAGTTAGTGATTATATATATATATATATATATATATATATATATATATATATATACACACACACACACACACACACACACACACATACAT…	0.474171	4762
AMER3	FALSE	FALSE	FALSE	TRUE	GACAGGCTCACATGCACCAGGAACTGCATGTGTCTTCATGACCACTTTCAGGAGAGCCTAGGACTCAAATCTCTATCTTTTGTCCCTGATGTGGGGACTGTGTTGGGGGTGGGGGGTGGCAGGACTCAGGCATGCAGAGGGTAGCATGTTCATGTGGAGGCATCCTTGCCTGAACCCACCAGCTCAGGCAGCCCACCGCCAAAGACAGCGCGAAGCTGCAACCACCTAGCTGCTCCTCATGCAGGGGCTGGAGAGAGGGGCTAGGGCTTGAAACTGAGGGGGAGAAAGAGCTGCACATTGTAAATGGGAAGCAGAGAGCCAATGAGTCTGCCTGGGATGTGTGTGAATCCCAAAAGACGCAATCCCAAATGCCATAGTCCCAAGTGTTGAGAATCCAAA…	0.505178	3476
AMFR	FALSE	FALSE	FALSE	TRUE	CGCTCCCTTGCCTTCCTCAGCTGCCTCCTGCGCCCTGTGCCCGACTGACTGGAGGAGGCCTGTCCCAATTCTGCCCGCTCCATGGAAAAGCGGGCTTGACTGCATTGCCGCTGTATAAAGCATGTGGTCTTATAGTGTTTGGACAGCTGATAAATTTAATCCTTCTTTGTAATACTTTCTATGTGACATTTCTCTTCCCCTTAGAAACACTGCAAATTTTAACTGTAGGTATGATCTCTTCTGGTGTTGACTGGACTGCTTGGGGTGGGGGACGATCAGGAGGAAGTGAGCAGTCGCCTGCCTGCAGCAGGCAGCTTCTACTCCTGCCTCATGCGTACGTCCCACAAATGCAGGTGTCCTGAGCACCACACCCAGTGGGAAGAGTGTGGGGGAGGCGCA…	0.444063	1457
AMH	FALSE	FALSE	FALSE	TRUE	CCCCTGCGCCGCGCGGACTCCTGCCCCGAGGGTCCGGACGCGCCCCAGCTCGCGCCCCTTCCCATATTTATTCGGACCCCAAGCATCGCCCCAATAAAGACCAGCAAGCAACCGGC	0.681034	116
AMHR2	FALSE	FALSE	FALSE	TRUE	GGGAGCTCCTAGAAGACTGTTGGGATGCAGACCCAGAAGCACGGCTGACAGCTGAGTGTGTACAGCAGCGCCTGGCTGCCTTGGCCCATCCTCAAGAGAGCCACCCCTTTCCAGAGAGCTGTCCACGTGGCTGCCCACCTCTCTGCCCAGAAGACTGTACTTCAATTCCTGCCCCTACCATCCTCCCCTGTAGGCCTCAGCGGAGTGCCTGCCACTTCAGCGTTCAGCAAGGCCCTTGTTCCAGGAATCCTCAGCCTGCCTGTACCCTTTCTCCTGTGTAA	0.590747	281
AMIGO1	TRUE	FALSE	FALSE	TRUE	GCAGGATGGGTTGGTGGGGAGATTCTGCCCCAGGAGAGGTAATGCACCCCTGAAGGATATGAGGGGATGGAAGAGAGGGCTGGCTGCCCAAGGGAATGGATTCCTCCTGACCTCAAGGGAATTGGTCCCAGGTACAACAGAGAGCAAGACCCCAAACAGGGCGTGGCTGCCACGATTTTCAAATGGGGGTATATTAATCCTCAGGCAAATGCTACACCCGTACCCAAAGCCCTGCCAATTCTCAGTGTGGTAGAGGAAGAGAAGCATGTCTGAGTTGGATGGGAATGAGGAAGGAGTGAGGGGAAGAACAGATTCCCTAAACTTTCATGAGGTCATCCCTAGCTCCTTAAGAGAAAAACATTTAGAAAAAAAAATTTTTTCTATCTCTGCCCACCCACA…	0.477273	3256
AMIGO2	FALSE	FALSE	FALSE	TRUE	TTTGTGCCTATATTTGTATGATGTCATAATTTAATCTGTTCATATTTAACTTTGTGTGTGGTCTGCAAAATAAACAGCAGGACAGAAATTGTGTTGTTTTGTTCTTTGAAATACAACCAAATTCTCTTAAAATGATTGGTAGGAAATGAGGTAAAGTACTTCAGTTCCTCAATGTGCCATAGAAAGATGGGGTTGTTTTCCAAAGTTTAAGTTCTAGATCACAATATCTTAGCTTTTAGCACTATTGGTAATTTCAGAGTAGGCCCAAAGGTGATATGACTCCCATTGTCCCTTTATTTAGGATATTGAAAGAAAAAATAAACTTTATGTATTAGTGTCCTTTAAAAATAGACTTTGCTAACTTACTAGTACCAGAGTTATTTTAAAGAAAAACACTAG…	0.346844	1727
AMMECR1	FALSE	FALSE	FALSE	TRUE	CACTGAGCCGCACAACCAGTCACTGGGCCTCTCTGCAGACCTCTTCCCAGGAGACCCTACACCTTCTTGGTCTAGCTATCTCTTTTACTGTACCATTTTATGATGATAGTTTCCGTTGCCATGGTGAAGCTTCGACATCGTCAACTAAGATCATCATGGTAACGGGTAGAAAAATGGCATTTGTTAAGATCCTGTTTTATTATTTTAGATCGTTGATTTTTTTTTTGCAGCATATATAATTTTGGGTTTTTTTTTCCTTATAATATTATGTAGAATTTTGCTTTGCTGTCTCAGTCAGGTTTCTGTTTTTCTGTCCTCCTTGCCTTTCTTCCCGTTTTGCTTCCTGTTTTCCTTCTTCCTTCCCGTTTTCCTTCTTCCTTCCCTGCCTCCCTTCCTTTG…	0.354176	4334
AMMECR1L	FALSE	FALSE	FALSE	TRUE	CACACGGCTGCATGACCAGTCCCACCCCCCCGTGGCCACCAATGGCTATGACATCATTGGAGCAGATGCCTCCTCTTCCTGGTCCAGTTACTTCTATTACTGCACCATTTTATGATGCTAGCTTCCGTTGCCAAGTCTGCCTCCCGCTGACTGAGGGAGGGTAGGGTTACCTTGAACGAAACAGAACTTGAGGGGCCCAAGCCTTATCTCAGCCTTTCCTCAATATGGGGTTCCGTTGGATTGGGGCTCCTCCATGACTAGTGGGAATTACTGTGGGTTCAGAAGACCCTTGTCTGGTATTTGCCACATGGGGTATTGGCCACACGCTGGAAGCTGAAATTGATGATCCCTGAAGGTTGAACCCACACACACCCCTGCAGCCTCCCCAGATGAAGTAGG…	0.454099	3464
AMN	FALSE	TRUE	FALSE	TRUE	GCGGCCGCCTGACCGTCGACCTTGGGGCTCTCCACCCGCTCTGGCCCCAGTCGAACTGGGGGCTAGCCACCTCCTCGTCCAGCCCCCAAACCTCCCCTTCCTTTCCCCCTCCTCCGGGGGCCAAGGACAGGGTGGCCTTACTCAGTAAAGGTGTTTCCTGCACCTGCTGTCAGCCTGGCTATGCCGCCACCGGCCCCGCCCATGAGGACTAGGAGCCCAGCCTTGCGCCGCATTCGCACTGGGGGACATGGGAGGGGTCTAGCTGGCCACTGCTGGAGGCAGCGCTGGTCGTCACCTGGGCGGCCAGAGGCTGGGATCTGCGAAGTTGAACCCAGAACTAGGAGTGGGGCTTCCCCCGCCTTCCGGTGAGGGGAGGGTGAGGAGCTGGAGGGAGGGGCG…	0.671875	512
AMN1	FALSE	FALSE	FALSE	TRUE	TGCTTTTTTGAAGATGATCAATGCTAGGAAAGCTTATCAAAACTACTTTCCCAGGAAACCATCTATAGAGATTTGCATTCTACTTAATGTTAACACTATTTTTAATTATTTTATTGTCTTAAGTTATAACTCTCAGAGAATTAGCTAAGTCTTGGTATATACATGGTTTGTGCTTTACTCTTAAACATCTTTAAAGTGCTATTATTCTATATCTGTTGGATGAGTCATTATTTTTGAAATGATAATCCTAGCATGAACTCTGATCTATGGTGTTGGATTCTGTTTCTTAAATAACTTTAAAATTAACTGTTTTCCCTTGAGATTTCCTTCTCCTATGTAGGTATTTGAGCTATTGTTCTAAGTTTACCTGTAAGTATAAACCTTGGGAGAATCTAAGTA…	0.324764	1167
AMOT	FALSE	FALSE	FALSE	TRUE	ACGGCCAAATCAAGAGCTGCAGATTATCAGCAAAAATGCTTTTAATCATTTTCCCCCTTTTATTGGTTCTTGTTTTGAGGGTGAGGACAAGGGTTGTGGGGAGGGGATGTTTTTTAACAGGACTTTTTATTGGAACAATGTACTACTTGAGTAATACCATGTGAACACCAGTCTATTTTGGTATGCTTAGGGAGTACCTCTAAAGACAGATTAATCAGAATGTGCTCTAAAGCTTATTGTTTGAATTTATACGAATACTGGGACTGTTAACAGGTGGCTATACATCGACGTTTTCAATGTGCTTAAATTTGTTTAAATTTTCCATATTCTAGATCATTTTTTATTGAAGAGCACAGTATGTGTGGAAGACAGTGTATAACACGTAGTTTGGAAGTGGGA…	0.395915	4064
AMOTL1	FALSE	FALSE	FALSE	TRUE	CTGCCATCCCTGTGGAATTTCAGTACAGAACACTGACAAACAAGGAAAGCGGCAGAGAAAGAAGAAAGACCTAGAAGGTTGTAGATGGGAAATCAGGAATGATTTGAACTGATAAAGATTTCAGACTCATAAGAACACATTTTATAAATGTTAAACACAAAAACTACATGACTGAAGATAGAAGAGAATGCGATGGATTTTATTACACATGGTGGAAGAGAGAAGAGGCGTGTAGGTTTGCAAACAAAGTTAAGAAATAGGAAACTGAATTTTTCATTGTACAGAAAATGTATCTCTTGGGGAGGGCCTGTGTACCCCCATTCTCTGATTATAAACAGATAAACCCAAATGTGGATCATCCTTGGAATACCCCCATTCTCCTTGCCTCTTAGCATGTTT…	0.446794	5958
AMOTL2	FALSE	FALSE	FALSE	TRUE	AGGAGGTGGTGCTTCAGGACTCTGAGCCATTCTCTCCCCTCCTCTGCCCTGTGCCACTCTCAGCCATTTCAGCAGCCCCGTCAACCGCTGCTCCGTCCCTTTCCCCAGCCAGACACTCATTCCCATTGACCATCTGGTCCCAGGAGCTCAGGAGGAGGACCCCAGGGGAGAGGAGAGCTGTGAGAGCACCGGCACCCCCAGAAGACTCTGCTTCTTAGCCCACATTCCTCCGGGCCTTATGGAGAATGAGGATTCAGCCTTGACTTCTTGCCCAAGGCCTGCTACTGGGGTAGCAACTGACAGCTCAGAAAGGAGCTGAGCTCCCTCTGCCCTGCCAGTTGTCAGTCAGGCAGGGAGGGAGTGGCTGTGTTGGTTTGGGGAACTAATTTCCACGGACGG…	0.474058	1831
AMPD1	FALSE	FALSE	FALSE	TRUE	AGTTCCTCTCCTCCAAGTTCCAGGTCCATCAGATGCTTAACGAGATGGACGAGTTAAAGGAGCTGAAAAACAACCCCCACCGAGATTTTTATAACTGCAGGAAGGTGGACACCCATATCCATGCAGCCGCTTGCATGAACCAGAAACATCTGCTGCGTTTTATTAAGAAATCTTACCAAATTGATGCTGACAGAGTGGTCTATAGCACCAAAGAGAAGAATCTGACCCTAAAGGAACTTTTTGCTAAATTAAAAATGCATCCTTATGACCTGACTGTTGATTCTCTGGATGTTCATGCTGGACGCCAGACCTTCCAGCGTTTTGATAAGTTCAATGACAAATATAATCCTGTAGGAGCAAGTGAGCTACGGGACCTCTACTTGAAGACAGACAATTACA…	0.447458	1475
AMPD2	FALSE	FALSE	FALSE	TRUE	GCCTGGTCCATGAAGTGCCCACCACATCGCAGCACTTTTACCACGTTTTGTCCTCAGACCCCGCCCATGCTGTGTGGTCTCTGCATGTCTCCATTCTTCTCTGTCTCTGTCTTGCATGTCTCCTACCATGTCACTGTCCCTGGGCCACCCAGTGAAAGCAAAGCCTGGGAATCTGCTCATTGTTGTTTGGGCTCAGGTATTGAGCCTGATGGCCCAGGTATTGAGGGCCTCCCCTGCTGGTGGCCCTGTCCTGGGATCCTCAGAAGCCTGACTGTCCTATGGGCTTCTCCAGTGTCCACAGGGGCTTGGGATGGTTGTGGGGGGCTGGCCCCTCTAGCCTTTCCGGTCCTTCCTGGGCAAATCTAAGCCTTGGCCAGGGCCGAAGTTTAGGCCCCTGTC…	0.579533	899
AMPD3	FALSE	FALSE	FALSE	TRUE	GTCCAGCATTTGACATGCATTTTAACTTTTTGGTTCAATTTCAAGTCTGCTGTGGCTAATAGTGGTCAAGATTCCGAACTAGGACTTTCCTCTGTGAAGAGGATGCCTCTGAAGAAATTTTAAACTGGTGATTTTGGTTGCACTGCTCACTTTAAGAGTTAACATGCTCACTTGTTAGTATTTCTGAGTAACAAGATGGTGACTTCTCCTTGGGGATCTGGGAGCTGAGCACTTGTCTATACTTGTTCCTAATTTTCCAAGTATTTCTCTTGAAACTGCCAGTGCCTGAACTGTTGGGGCCAGGATTTTCCCTGGTCAGATGCCAAGTAACATGTGGTTTTCTGCCATACTTTTCTCCATTGGCCCAGGTAGGCTAATTGGTAGTTGTTCATTTCAGCC…	0.385251	1695
AMPH	TRUE	FALSE	FALSE	TRUE	GGCAACAAGTACTGCAAGAAGGAGCTCAGTTACGGGGTTTTTAAACCTTCATGAAAACCTGAAGAGTTCACTTTTGTTATTATGCTCTTAATGATTTACAGACTGATGCCAGACAAACCTTGGGAAGATGTATCAATGGAGCATGTGTGCAAAAAAATGTAAGAGGAAAAAAAGTAAATTAAGGAAAAAATCCTCACTCATTCCCATGTTGTCAATAACAGGTTTGTTTGTGCTTTGTCCAAGCTGTGGAGACTCTTGTACTTGATCCCCTCCCACCAATTCTAAAGTAGCTTTCTCCAGATCAGACTTTAATTTCTCTGCATCAGGTGTATCGTATTGAGTGGCTGCCCTGCAGAAGATGTGATGAATTATCCTGTAGTACAAGATTATCTTATTCCC…	0.408438	1114
AMT	FALSE	TRUE	FALSE	TRUE	ACTGGATTCCAAGGACAGCCTTCTCAGAAGAGCTAGAGACCAAGATACTTGGTAGTGACCGGGTGAAGCTGATGGAGAGTCTAGTGGTTGGAGACATTGCAGAGCTAAGACCAAACCAGGGGACACTGTCGCTGTTTACCAACGAGGCTGGAGGCATCTTAGATGACTTGATTGTAACCAATACTTCTGAGGGCCACCTGTATGTGGTGTCCAACGCTGGCTGCTGGGAGAAAGATTTGGCCCTCATGCAGGTATACCCCCTCTGTGTTCTAGACACCTTGTCTTCCTTGTTCATAGAGCAGTATCCTTGTTGTCCAAGACAGGGTTGGCACAGACAAGGGACCTGGAAAATGGCTCTTTCAGTGAATGAACAGCTATGAGACTCAAGAGCAGGCCCTC…	0.547319	1902
AMTN	FALSE	FALSE	FALSE	TRUE	GCTGTTTCAAATTTTTTCAACTAAGCTGCCTCGAATTTGGTGATACATGTGAATCTTTATCATTGATTATATTATGGAATAGATTGAGACACATTGGATAGTCTTAGAAGAAATTAATTCTTAATTTACCTGAAAATATTCTTGAAATTTCAGAAAATATGTTCTATGTAGAGAATCCCAACTTTTAAAAACAATAATTCAATGGATAAATCTGTCTTTGAAATATAACATTATGCTGCCTGGATGATATGCATATTAAAACATATTTGGAAAACTG	0.274368	277
AMY1A	FALSE	FALSE	FALSE	TRUE	AATTTAAAATTAAATGCAAATCCGCAAAGCAATA	0.235294	34
AMY1C	FALSE	FALSE	FALSE	TRUE	AATTTAAAATTAAATGCAAATCCGCAAAGCAA	0.25	32
AMY2A	FALSE	FALSE	FALSE	TRUE	AATTTAAAATTAAATGCATGTCCTCAAAACAATA	0.205882	34
AMY2B	FALSE	FALSE	FALSE	TRUE	TTTCCGCAATGTAGTGGATGGCCAGCCTTTTACAAACTGGTATGATAATGGGAGCAACCAAGTGGCTTTTGGGAGAGGAAACAGAGGATTCATTGTTTTCAACAATGATGACTGGACATTTTCTTTAACTTTGCAAACTGGTCTTCCTGCTGGCACATACTGTGATGTCATTTCTGGAGATAAAATTAATGGCAATTGCACAGGCATTAAAATCTACGTTTCTGACGATGGCAAAGCTCATTTTTCTATTAGTAACTCTGCTGAGGATCCATTTATTGCAATTCATGCTGAATCTAAATTATAAAATTTAAAATTAAATGCATATCCTCAAAAC	0.365269	334
AMZ1	FALSE	FALSE	FALSE	TRUE	TACAGCAGGGGCTGCCCTACGTCTCCTTCCCTAAGGATGCTGGCCAGCACTGTCCAGTAGCTGAGGCCACTACTGACCTGCCAGGGATAAAGAGGAAGGGTCTGCCTGGGTGGTGGCTCAGGCCTGTCATCCCATCACTTTGAGAGGCCAGGAGTTTGAGACCAGACTGGGCAACATGGTGAGACTCTGCCTCTACAAAAGAAAAATTAAAAAATTAGCTGGATGAAGTGGTTCATGCCTGTGTTCCCAGCTATTCAGGAGGCTGAGGTGGGAGGATTGCTTGAGCCTAGGAGGTCGAGGCTGCAGTGGGATGTGATCATACCACTGTACTGCAGTCTGGGCCACACAGAAAGACTGTCTCCAGAAAAAAAAAAGTTCTTTGGAGAAGCCACAGACCAC…	0.528075	3651
AMZ2	FALSE	FALSE	FALSE	TRUE	AGATGCCTTCTGTGTTGTGGGAATAACAATGATTGATCTTTACCCAAGAGACTCGTGGAATTTTGTCTTTGGACAGGCCTCTTTGACAGATGGTGTGGGGATATTCAGCTTTGCCAGGTATGGCAGTGATTTTTATAGCATGCACTATAAAGGCAAAGTGAAGAAGCTCAAGAAAACATCTTCAAGTGACTATTCAATTTTCGACAACTATTATATTCCAGAAATAACTAGTGTTTTACTACTTCGATCCTGTAAGACTTTAACCCATGAGATCGGACACATATTTGGACTGCGACACTGCCAGTGGCTTGCATGCCTCATGCAAGGCTCCAACCACTTGGAAGAAGCTGACCGGCGCCCTCTAAACCTTTGCCCTATCTGTTTGCACAAGTTGCAGTG…	0.407503	773
ANAPC1	FALSE	TRUE	TRUE	FALSE	CCGTGTCTGGCGGTGAACCTACCCTGAAACGTGACTTCTGCACAACAAACGTGACCAAACATCAAAGCTAAAGCAATGTTTATAAAGTTTTATGGTATAACTAGGGGGAAATGAGCTGCACAAACCTCAATGTATTTTAAATCTGTTGCTGTCATCATTAACGGTATATGACATATAAAAGCAAGTTAAAATTTACTTTTGTAAATAAAGTTTTTGGTTTGTTTCCAAAACTCTTGATGATTGCTTTAGTTTTGGACTTAGAGAATAGAGCAGGGGTTGCTGGAGTGAATATTGATTTTTAAAGTCTTTGAACTGTGGTGGTATAGGTGAAGTGACTATGCCCAAAAATGCCAAGTTTTAAAAGAAGCTATGTCATAAAGTTTTACTTTCTGTGGCAAA…	0.402056	1654
ANAPC10	TRUE	FALSE	TRUE	FALSE	TTGTGAACTTCTAGGCTCAAGCCATCTGCCTGCCTTGGCCTCCTAGGATTACAGATGGCTACCTTCTTGCTGTATCTTCACATGGTGGAAAGAGTGAGTGAGCACTGGTCTGTTTCTCTTCTTACAAGGACACTAATCTCATCATGAAGACTCTACTCTCACGACATCTTCTAAACCTAATTACCTCCCAAAGGCCCCACCTCCTAATACCATCACATAAGTGGGTTTCAACATGTGAATTTGGGGGAGGCATAAACTTTCAGTTCATAACAGCTTCTTTGCATGCTTGCTCATTTTTAAATTAGATTCCACACAGTAAATTTTATATTGTTGAGTACCTGATTTCATTTGATTCCTTTAAAGAGTGTTGTAGTTTGTTTTGCGAAGCCCTTTTGGTTC…	0.38216	1065
ANAPC11	FALSE	FALSE	TRUE	FALSE	GGCCCGACCTGGCTCTCGCTGGAGGGGCATCCTGAGACTCCTTCCTCATGCTGGCGCCGATGGCTGCTGGGGACAGCGCCCCTGAGCTGCAACAAGGTGGAAACAAGGGCTGGAGCTGCGTTTGTTTTGCCATCACTATGTTGACACTTTTATCCAATAAGTGAAAACTCATTAAACTACTCAAATCTTGCTGGAGGCCTCTGGGTGCCTGTGTTCTCGGCATATAGATGTGGTCTCGGTGTGTTTTGATATGAAAACTCTCATGAATAAACATCTCCGTGAAACGCCAAGGCCCTCGTCAAACCCTGAGTCATGACTGGGAGGAGAAGGAGCAGGATCAGACGGTAGAGCCTGGGGCATGCTCTTCAGGCATGCTCTTGCCTGCTGGATTGCCGGCGG…	0.570194	926
ANAPC13	FALSE	FALSE	TRUE	FALSE	CGCTTGGCTCCTTTCTTGTGGATGGATTTTCTCAAAGTACACAGATAAAGCATGGTTTGTTTCAGTCTCCAAATTCAAACCTTTGAGTAATAAATCAGCACTCAAAAATGTACACCCATTTAGTTTGTGGTAGCAAAGTGCAATGCGAAATTGAATGAGAAACTGAGATTTCTCAGTAATGGTGAATATTTCGCTCTTTAAACCTAAAACTCTTCATTGAGTAGCTTATATTTGAACATGATTGGTTAAACATTTGCCTCTACCTCTGATTTTGCTTTGCTGTCAAAGTTTAACACCTTCCAACTACTTATGTGTGTCCTGTAACACAGGTGATTGAACGTATGAGAGGGAAAGGCAAAGAAAAAGGAAGCCAGACACTAGGAGAATTATTAACTTCTC…	0.36086	884
ANAPC15	FALSE	FALSE	TRUE	FALSE	AATTTGTAGTTTCATTCCCCTTTTATTGCTCATCAAATGTATTTCTGATCTTGGAATTGGATGAACTTTTATTTATTTATTTTTGAGACCAAGTCTTGCTGTGTTGCCCAGGCTGGAGTGCAGTAGCATGATCACGGCTCACTGCAGCCTTGACCACCCAGGCTCAGGCAATCCTCCCACCTCAGCATTTCCAGTAGCTGGAACCACAGTTACTCACCACCACACCCGGCTAATTTTTAAATTTTTTGTAGAAACGGGGGTCTTGCTTTGTTACCCAGGCTAGTCTCGAACTCCTGGGCTCAAGTGATCCTCCTGCTTTGGCCTCCCAAAGTGCTGGGATTACAGGCATGAGCCACCATGCCCAGCCAGTGAATTTCTTTTCTTTTCTTTTTCTTTTTT…	0.471737	973
ANAPC16	FALSE	FALSE	FALSE	TRUE	TACTGCCTGGATGGTCACCTCTGGTGCGCAGCAAGTGCAAAGCCAGTGGGGGACTTTCTCACAGCTTACATAGCCATCCAGAGATCCACAGCTACGTCACTGAATTGTTAATGCACATTTGTACTTGGTTTCTCTGTATCTATTCACAGGCAACAAATACTTATATGTGTGATCTTTCAGGGAATGTTTTGTTTATTTGTTTTTAAAAGTATTGGGAATCAGATTAAGACAATCAGTTTCAGAGAACCAGGAGGTTTGGGGTTAAGAGATACTCAAAAATTTTCACAAGCCAAGTAGGGCATATATCAGATTTGGCCAACTGAATGGCGTCTGTCCTGTCATCCATATGGTGCCTGGAAATATTTACCAGTCAAGGTCAAGGTCAGCATCTGTGGTTAA…	0.417638	2744
ANAPC2	FALSE	FALSE	FALSE	TRUE	CACATCGCCCGCCCGCCCGCCCGCCCGCCAGGCGCTGCCCTGCAGGTGCTCTCGTCCTCCCGTGCCAGCCCCCGCCCGCCCGTGTCCCAGAATGCACTGCTGAGGAGCATGCCCACCCCCACCCCCGCAGTGTGCAGATTAAAGCAAGTCAGATCATC	0.702532	158
ANAPC4	FALSE	FALSE	TRUE	FALSE	AAAAACCTGAGAGCTTACACTCTTTTTCTGTGGAGGCTCCAGTTTCCTGTATGCATTGGATGGAAGTGACAGTAGAAAGCAGTGTTCTCACATCATTTTATAATGCTGAGGATGAATCAAATCTTCTCTTACCTAAACTACCTACACTGCCAAAAAACTATAGCAACACCTCAAAAATATTTAGTGAAGAAAATTCTGATGAAATTATTAAGCTCTTGGGAGACGTCAGGCTTAATATTCTCGTCCTTGGAGGAAGCTCTGGATTTATTGAGCTTTA	0.375451	277
ANAPC5	FALSE	FALSE	TRUE	FALSE	AACAGTGCTGAACTTGGCTTTTGCGCAGCTCATTCTTGGAATCCCAGAACAGGCCTTAAGTCTTCTCCACATGGCCATCGAGCCCATCTTGGCTGACGGGGCTATCCTGGACAAAGGTCGTGCCATGTTCTTAGTGGCCAAGTGCCAGGTGGCTTCAGCAGCTTCCTACGATCAGCCGAAGAAAGCAGAAGCTCTGGAGGCTGCCATCGAGAACCTCAATGAAGCCAAGAACTATTTTGCAAAGGTTGACTGCAAAGAGCGCATCAGGGACGTCGTTTACTTCCAGGCCAGACTCTACCATACCCTGGGGAAGACCCAGGAGAGGAACCGGTGTGCGATGCTCTTCCGGCAGCTGCATCAGGAGCTGCCCTCTCATGGGGTACCCTTGATAAACCATCT…	0.511407	526
ANAPC7	FALSE	TRUE	FALSE	TRUE	GGGGGCGGCAGCTCCATGGCCGCAGTGGCCTGCCCTGCTCTGAGCACTTCCGTGGACTGAAGGAACCGTAGGAGCCTGCTCTCAGAAGGACAATGATTCAGCATGTGATTGCAGCAGGGGTCTCTGCCCCCTCGCTCCCAATTCCTAGTCGTGACTTCATTTCTAAAACAGAGCCTGACCAACCTTCCATGTATCTCCATCCTCCCCTGCTCCAGCCAGGGAGGACTGAGGGAGTGCCCCGAGACCCACGCACATGTTGGGGCTTCTGGGCCAAGAGTACTTTTTATATAACTAATTTCTAAATCCAAAAGCTCAAGGAATAGACAGTGTTCTGTGACATGGATTGGTTTGAAGGAGTTACCCACCATCCCAGCACGATAATGTCATCTCCCAAGTTGG…	0.481511	1244
ANG	FALSE	FALSE	FALSE	TRUE	CCAGCGGGCCCCTGGTCAAGTGCTGGCTCTGCTGTCCTTGCCTTCCATTTCCCCTCTGCACCCAGAACAGTGGTGGCAACATTCATTGCCAAGGGCCCAAAGAAAGAGCTACCTGGACCTTTTGTTTTCTGTTTGACAACATGTTTAATAAATAAAAATGTCTTGATATCAGTAAGAA	0.466292	178
ANGEL1	FALSE	FALSE	FALSE	TRUE	CAGGGCTCCCAGGGGAAGAGAGCTTCTCTTCCAGAAGAGCTCACTGGATCAGAGACTGTGGAAAAATCCCATGCATCTAGAAACTTAGATCCAAGAAACTTACATCCCCTCCCTTCCCCCTCCTCGTTCCCTTTTTCCCACGGTTAGACTTTCTCCAGGCCTGGCTGCGTTCTCTGCCTGTGGTCCTTGCCCCACCCCAGCCTCTTCCTAATCCTGTGCCACACACTCAGTGGCCCTGGGAGAGGCAGAAGGGGGGCTCCCCCTTCCTTCCATGTATCCAGCGCTCCCCCTTGATTTTTAATTACCAGGGTTATGGGAGTTCTTGATTTCATTGGTTATTTGCTTTCAGGCCGTTTCTTGATGTACCTTCTGACCTGACCTTTTCCCTGCCTTCAGGAC…	0.504918	3050
ANGEL2	FALSE	FALSE	FALSE	TRUE	CTCTCTTTGATCACATACTAATTTTCTTTCCAATTTGTATTGTTTTTCAAAGAATGTAAAGTTCTTAAGTGTATGCATGTTGTTTATTTTTGCACTGTGGAGATTCTGAAGCGGTTATGTTAGATGCTTTGAAACTCCATATCAGAAGAAATAACTTTATAACAATTTTTTTTAATAATGAAAAATATTTTCGTGACAAGTGAGCTCTAAATTCTCTTTATTGTAAAAGAGATGTAAAGGTTTTATATTCTAAATCCTAGTAAAATTGACAGTGATTTTTAAATATAATGCATCTTCCTTTGTCTGCTTAGTAAAAAATTTCATTTCATAATTTTGGCAAGCTCTGTAGTGGATCCAAAGTATCTTTGAGTTCTTGCAAACTACAAGTTGTTTCCTTTC…	0.356768	2859
ANGPT1	TRUE	FALSE	FALSE	TRUE	AAGCGCAATGTCAGAAGCGATTATGAAAGCAACAAAGAAATCCGGAGAAGCTGCCAGGTGAGAAACTGTTTGAAAACTTCAGAAGCAAACAATATTGTCTCCCTTCCAGCAATAAGTGGTAGTTATGTGAAGTCACCAAGGTTCTTGACCGTGAATCTGGAGCCGTTTGAGTTCACAAGAGTCTCTACTTGGGGTGACAGTGCTCACGTGGCTCGACTATAGAAAACTCCACTGACTGTCGGGCTTTAAAAAGGGAAGAAACTGCTGAGCTTGCTGTGCTTCAAACTACTACTGGACCTTATTTTGGAACTATGGTAGCCAGATGATAAATATGGTTAATTTCATGTAAAACAGAAAAAAAGAGTGAAAAAGAGAATATACATGAAGAATAGAAACAAG…	0.309313	2373
ANGPT2	FALSE	FALSE	FALSE	TRUE	ACATCCCAGTCCACCTGAGGAACTGTCTCGAACTATTTTCAAAGACTTAAGCCCAGTGCACTGAAAGTCACGGCTGCGCACTGTGTCCTCTTCCACCACAGAGGGCGTGTGCTCGGTGCTGACGGGACCCACATGCTCCAGATTAGAGCCTGTAAACTTTATCACTTAAACTTGCATCACTTAACGGACCAAAGCAAGACCCTAAACATCCATAATTGTGATTAGACAGAACACCTATGCAAAGATGAACCCGAGGCTGAGAATCAGACTGACAGTTTACAGACGCTGCTGTCACAACCAAGAATGTTATGTGCAAGTTTATCAGTAAATAACTGGAAAACAGAACACTTATGTTATACAATACAGATCATCTTGGAACTGCATTCTTCTGAGCACTGT…	0.350145	3450
ANGPT4	FALSE	FALSE	FALSE	TRUE	CGAGCAGCTGTGCCAGAGGCTGGACCACACAGGAGAAGCTCGGACTTGGCACTCCTGGACAACCTGGACCCAGATGCAAGACACTGTGCCACCGCCTTCCCTGACACCCTGGGCTTCCTGAGCCAGCCCTCCTTGACCCAGAAGTCCAGAAGGGTCATCTGCCCCCCAACTCCCCTCCGTCTGTGACATGGAGGGTGTTCGGGGCCCATCCCTCTGATGTAGTCCTCGCCCCTCTTCTCTCCCTCCCCCTTCAGGGGCTCCCTGCCTGAGGGTCACAGTACCTTGAATGGGCTGAGAACAGACCAAACTTGATTCCCATGACCAATGGTGGGGTTGCAGGCAGGTGGGAATGTATTTGCACATCGGAAGCTGCCCAGATGGCCCAGGTTCTCTCCCTTG…	0.513558	3061
ANGPTL1	TRUE	FALSE	FALSE	TRUE	AGAGAGACACTCGCCAATTTAAATGACACAGAACTTTGTACTTTTCAGCTCTTAAAAATGTAAATGTTACATGTATATTACTTGGCACAATTTATTTCTACACAGAAAGTTTTTAAAATGAATTTTACCGTAACTATAAAAGGGAACCTATAAATGTAGTTTCATCTGTCGTCAATTACTGCAGAAAATTATGTGTATCCACAACCTAGTTATTTTAAAAATTATGTTGACTAAATACAAAGTTTGTTTTCTAAAATGTAAATATTTGCCACAATGTAAAGCAAATCTTAGCTATATTTTAAATCATAAATAACATGTTCAAGATACTTAACAATTTATTTAAAATCTAAGATTGCTCTAACGTCTAGTGAAAAAAATATTTTTAAAATTTCAGCCAAA…	0.294944	1424
ANGPTL2	FALSE	FALSE	FALSE	TRUE	GCCAGCTCCCCCTCCTGACCTCTCGTGGCCATTGCCAGGAGCCCACCCTGGTCACGCTGGCCACAGCACAAAGAACAACTCCTCACCAGTTCATCCTGAGGCTGGGAGGACCGGGATGCTGGATTCTGTTTTCCGAAGTCACTGCAGCGGATGATGGAACTGAATCGATACGGTGTTTTCTGTCCCTCCTACTTTCCTTCACACCAGACAGCCCCTCATGTCTCCAGGACAGGACAGGACTACAGACAACTCTTTCTTTAAATAAATTAAGTCTCTACAATAAAAACACAACTGCAAAGTACCTTCATAATATACATGTGTATGAGCCTCCCTTGTGCACGTATGTGTATACCACATATATATGCATTTAGATATACATCACATGTGATATATCTAGAT…	0.466708	1607
ANGPTL3	FALSE	FALSE	FALSE	TRUE	ACTGAGGCAAATTTAAAAGGCAATAATTTAAACATTAACCTCATTCCAAGTTAATGTGGTCTAATAATCTGGTATTAAATCCTTAAGAGAAAGCTTGAGAAATAGATTTTTTTTATCTTAAAGTCACTGTCTATTTAAGATTAAACATACAATCACATAACCTTAAAGAATACCGTTTACATTTCTCAATCAAAATTCTTATAATACTATTTGTTTTAAATTTTGTGATGTGGGAATCAATTTTAGATGGTCACAATCTAGATTATAATCAATAGGTGAACTTATTAAATAACTTTTCTAAATAAAAAATTTAGAGACTTTTATTTTAAAAGGCATCATATGAGCTAATATCACAACTTTCCCAGTTTAAAAAACTAGTACTCTTGTTAAAACTCTAAA…	0.260805	1342
ANGPTL4	FALSE	FALSE	FALSE	TRUE	ACCATGAGGTGGCCAAGCCTGCCCGAAGAAAGAGGCTGCCCGAGATGGCCCAGCCAGTTGACCCGGCTCACAATGTCAGCCGCCTGCACCGGCTGCCCAGGGATTGCCAGGAGCTGTTCCAGGTTGGGGAGAGGCAGAGTGGACTATTTGAAATCCAGCCTCAGGGGTCTCCGCCATTTTTGGTGAACTGCAAGATGACCTCAGATGGAGGCTGGACAGTAATTCAGAGGCGCCACGATGGCTCAGTGGACTTCAACCGGCCCTGGGAAGCCTACAAGGCGGGGTTTGGGGATCCCCACGGCGAGTTCTGGCTGGGTCTGGAGAAGGTGCATAGCATCACGGGGGACCGCAACAGCCGCCTGGCCGTGCAGCTGCGGGACTGGGATGGCAACGCCGAGT…	0.626072	1166
ANGPTL5	FALSE	FALSE	FALSE	TRUE	TCTCATTTAACATTGTAATGCAAGTTCTACAATGATAATATATTAAAGATTTTTAAAAGTTTATCTTTTCACTTAGTGTTTCAAACATATTAGGCAAAATTTAACTGTAGATGGCATTTAGATGTTATGAGTTTAATTAGAAAACTTCAATTTTGTAGTATTCTATAAAAGAAAACATGGCTTATTGTATGTTTTTACTTCTGACTATATTAACAATATACAATGAAATTTGTTTCAAGTGAACTACAACTTGTCTTCCTAAAATTTATAGTGATTTTAAAGGATTTTGCCTTTTCTTTGAAGCATTTTTAAACCATAATATGTTGTAAGGAAAATTGAAGGGAATATTTTACTTATTTTTATACTTTATATGATTATATAATCTACAGATAATTTCTA…	0.241322	605
ANGPTL6	FALSE	FALSE	FALSE	TRUE	CTCTGTGTTCCTCTGTCCCCTAGGCCCTAGAGGACATTGGTCAGCAGGAGCCCAAGTTGTTCTGGCCACACCTTCTTTGTGGCTCAGTGCCAATGTGTCCCACAGAACTTCCCACTGTGGATCTGTGACCCTGGGCGCTGAAAATGGGACCCAGGAATCCCCCCCGTCAATATCTTGGCCTCAGATGGCTCCCCAAGGTCATTCATATCTCGGTTTGAGCTCATATCTTATAATAACACAAAGTAGCCACA	0.521912	251
ANGPTL7	FALSE	FALSE	FALSE	TRUE	AAGGAGGCTGCCGTGGAGCACGGATACAGAAACTGAGACACGTGGAGACTGGATGAGGGCAGATGAGGACAGGAAGAGAGTGTTAGAAAGGGTAGGACTGAGAAACAGCCTATAATCTCCAAAGAAAGAATAAGTCTCCAAGGAGCACAAAAAAATCATATGTACCAAGGATGTTACAGTAAACAGGATGAACTATTTAAACCCACTGGGTCCTGCCACATCCTTCTCAAGGTGGTAGACTGAGTGGGGTCTCTCTGCCCAAGATCCCTGACATAGCAGTAGCTTGTCTTTTCCACATGATTTGTCTGTGAAAGAAAATAATTTTGAGATCGTTTTATCTATTTTCTCTACGGCTTAGGCTATGTGAGGGCAAAACACAAATCCCTTTGCTAAAAAGAA…	0.400835	958
ANK1	FALSE	FALSE	FALSE	TRUE	CCCCGAGCCGCTCTCCTTGGAGTAGCCTCTCGGGAGGATCACACCTCGACACCCAACCCCTGAACCCCACACACTCTGCCATGCACACAGGAGGAGAGCTGGACCTGAGGGCCACCGCAGCGGTGCACACATTCCTCTGGGCTGACGGCATGACCTCTGTAAGGGACTCCTGCTAGTCCCCTCTTGGCATGAATGACTGACTGTAGACGCATGACCTCCAGGCTTCAATCCTGCCTCTTGCAATGACAGCTGATCTGTCGGAACCAGGACACAAAAGCAGCAAGAAGCGGGGAGAGAGAGGGATAGAAAACAAGCGCAGGAGAGCCTGCGAACGCAAAAGTGAATGAGGGCTTTTTGTGGCTGGGGATGGGTTTTGGTTTTGGGGTTTTTTTTTTAAAT…	0.576218	2565
ANK2	FALSE	FALSE	FALSE	TRUE	TGAAACATTTGAGAACTTACCAAAGGACTGCCCCTCTCAAGACTCATCCATTACTACTCAAACAGATAGATTTTCCATGGATGTTCCCGTGTCTGACCTAGCTGAGAATGATGAAATCTATGATCCACAAATCACTAGCCCTTATGAAAATGTCCCTTCCCAATCTTTTTTCTCTAGTGAAGAAAGCAAAACCCAAACAGATGCAAATCACACCACAAGTTTTCACTCTTCTGAAGTGTATTCTGTTACCATCACATCCCCTGTTGAAGACGTTGTAGTGGCAAGCTCCTCTAGTGGAACTGTTTTAAGCAAAGAATCTAATTTTGAGGGCCAGGACATAAAAATGGAATCCCAACAGGAAAGTACCTTGTGGGAAATGCAATCAGACAGTGTCTCTTC…	0.431094	5493
ANK3	FALSE	FALSE	FALSE	TRUE	CAGCGAACGGTCAGTCAAGGATCATAAGTTTTTACTGCCAGTATTGAGAAATTCGTGGAAGAAATGTCAGCAGGAAGTAAAAATTCACCGAGAAGTGTGTGTGTGTTCGCTGCTTCCACACATTAATGGCATGATTTTTTTTATGCAAAAAGAAAAGAAAAGAAAACCACCCACATTTTAATTTAGCATGAGCCAATTTACAGAGCATGGAAATCACTTTCATTTCCGGATTGGCGCGTGTGCAATTAGCAATGCAGTGTATATACAAGAAGCCATGCTGTTAACAGTTTATCTCAAGTAATTTGGTGTCATTTACAAAAGGAAGAAATTCCTGCCATCAGAAGGGACAGAAGGAGATGGAATGATCAAATCACAGAGAAACACTAAAATTACTAAATC…	0.356257	3548
ANKDD1A	FALSE	FALSE	FALSE	TRUE	CCGGAGGGGCCAGACCTTCAGGCACGTGGGACCTCAGCGTGTGGAGCCACCTGAACAGAAGATGACCATCATTTAAGGGCTTTTTAAAAAATCACTGTTAACAGACCTCCAGGTGATTCTACTGAAATGCACAGTCATGCAGAGCCCAGGAGGCAAATGTTTGTACACTGATCTTTTTCATGAGGATGGGTCCAAGGGCCTGTAATCCCGTCCAACAGGCTGGAGTACAATGGCGAGATCTCAGCTCACGGCAACCTCCGCCTCCCGGGTTCAAATGATTCTTGTGCCTCAGCCTCCCGAGTAGCTGGGATTACAGGTGCATGCCATCACAGCTGGCTAATTTTTGTATTTTTAGTAGAGATGGGGTTTGGCCATGATGGCCAGGCTGGAAAATTGAAA…	0.373547	1807
ANKEF1	FALSE	FALSE	FALSE	TRUE	GTCATAGCAGTTATTTCTTGGGGTAAATGCTTTGAGGCCCAGGGACCAATCTTTGGAGAAAGTAGATATTTCCATCAAAGCCAAAGCAATCCATACACCAAGAACTTGTTACCAAGAATTTCTTTTTGCTTTAACAACTATAAATATTCTTAGCTGTCTAGAGAAAAGATGTATGTTATTTTGAAATGAATGGTATGTCATTCTGGATAAATCCCCAAGCCCCTTTATGAATGTAGTGAAATACATGGCATGTGGGTTATAAACGTTGCTGTCAAAAGATTTACCAGGTCTACACCATTATGCTTATTATTTTTTTAATTATCCTTTTTATTTATTAAATAGAGACAGAGTCTCACTATATTGCCCCAGCTGGTCTCGAACTCTTGAGCTCAGGCAGTC…	0.365872	2643
ANKFN1	FALSE	FALSE	FALSE	TRUE	GGAGGCCCATCCCGGCTGTCCACCCCTCCATGGCTGCTACCTGCGTTTTACATCACCCTTACCCCCATCCTGCCCCACTGTGTACCCACTCATTTTCAAGCGTTTTGAATGTTATAAATACAAAGGTTACAAGTTCAAGGTCCTCTTTTTTTGGAACAGAGTGGTGGGTGGAGGCCAGAGTTGCCAGTGCCATTCCCACTTCAGCCTAGAAAGGGCATGGGGGAGTTGTGTCAACATGGAATACGACATACAGTGACTCAAACATGCCACCCTGTTGGTGGCACCTATGACTGAAGCTGGCCATCCCAAAGAGAGACCCTCTGTTCTGCAGCTGGTTCTGTAATCTGACCCCTAGTTTAGGGCTCTTTCATGAATTTGTGATTGATGAAG	0.5	390
ANKFY1	FALSE	FALSE	FALSE	TRUE	TGAGCCCCCCGGAGGGTCCAGGCCACGTCCTTGGTCACCTCCCCAGCAGCTGCTCTGCTCACCAGCCTGACCCCACCCAGAGCAGGAGCTGGCGGGTGTCTTCCTGCGGCAATAGACTGGAACGATTAAGGACCATGGTGTGATAGATCCCATTTCAAATGATTCCATATGATTGTCAGTGTGTGTGTCAGACTGTGATCGATTTCACTAGATGTCTCACTCATCAGACCAGGCCATTGGGCCTAAGTGGTAAATGTGATTAGGAATTAGACCTCTCCCCATTCTGCTAGCAACATACAGGGACACTTGGAAAACCATTTCCCCTTCCAGTAGCTTGGTGTCCATCCCAGAGCATTCATGAAGTCTTCCCGCCTGGGCTGACTGATGAGGCAGAGCCTC…	0.453771	3872
ANKH	FALSE	FALSE	FALSE	TRUE	GGCACGGGACGCCATGGGCACTGCAGGGACAGTCAGTCAGGATGACACTTCGGCATCATCTCTTCCCTCTCCCATCGTATTTTGTTCCCTTTTTTTTGTTTTGTTTTGGTAATGAAAGAGGCCTTGATTTAAAGGTTTCGTGTCAATTCTCTAGCATACTGGGTATGCTCACACTGACGGGGGGACCTAGTGAATGGTCTTTACTGTTGCTATGTAAAAACAAACGAAACAACTGACTTCATACCCCTGCCTCACGAAAACCCAAAAGACACAGCTGCCTCACGGTTGACGTTGTGTCCTCCTCCCCTGGACAATCTCCTCTTGGAACCAAAGGACTGCAGCTGTGCCATCGCGCCTCGGTCACCCTGCACAGCAGGCCACAGACTCTCCTGTCCCCCT…	0.42942	6397
ANKHD1	TRUE	FALSE	TRUE	FALSE	GTTAGAAGGTCTTTACTCTTTAGCCTTGTTTAAGAAACCTATGACCTTGGAAGAACCATGGGGATTTTTTTTTAATGTGCCTAAGAAATTTTCTCTGAGGCTTTAGCAATGGAAATTTGATTGCCCATTGTATAAGAACAAATTGATTTCCTATCCACCTGATTATGTTCTCTGGTTAGTTTAGCCATTTTGAACTTAAGATCATATGACCTTAGTGCTTTTGGCTAAACATACAGAATACTACTTGTATGCAGAAGAGAATTAGTTGATTACATGTTTCAACCTTTTAGGGTGATAAATACATGTATAATTGTTTACATACTTAAAAGGAAAAAGTTGAGTAAATTTCTTGTCATATAGTGGCTCTACGTAATGTAGCCTGTATTAATGTGAAATATT…	0.315068	438
ANKIB1	TRUE	FALSE	FALSE	TRUE	ACTGCACACATCTGGGCTCTAAATGAATTACAGGTACAGATGGTATGCTAGGTGGAGTATGCTTGATAGAGACTTTGATTCACTTAATTCCAACTCAGTGATAAACCACTGACATTAGGGTTGAATACAGAGAAGTTCCCTTGAATGGTAGCTTCATTTTTTATTTTAACCTTACAGGGAATTTCCTTTGTACTTAATTGAATAGCTTTTCCCCTTTTTGCTGACAAAAAGAAGAGCAAGAGAAAGAGAAACAAAAATGAAATAAATAAGTTGTATTCCACACTCTAAGAAAATGCAGTCCTCTATTTAGCCTAGGCTTGACAATACTTAAATTGAACATTTAAACTAAAGGCTTACTCCCTAATCTTTGGGTGGCTTTCCTTTAAAAAAAAAAAAAAA…	0.330595	2435
ANKK1	FALSE	FALSE	FALSE	TRUE	GAAGATAAGTAATTTGGCCAAGACCATCCAGATAATTTCAGACTTCGGCCTGTCCAAGTGGATGGAACAGTCCACCCGGATGCAGTACATCGAGAGGTCGGCTCTGCGGGGCATGCTCAGCTACATCCCCCCTGAGATGTTCCTGGAGAGTAACAAGGCCCCAGGACCTAAATATGATGTGTACAGCTTTGCAATTGTCATCTGGGAGCTACTCACTCAGAAGAAACCATACTCAGGGTTCAACATGATGATGATTATTATCCGAGTGGCGGCAGGCATGCGGCCCTCCCTACAGCCTGTCTCTGACCAATGGCCAAGCGAGGCCCAGCAGATGGTGGACCTGA	0.523256	344
ANKLE1	FALSE	FALSE	FALSE	TRUE	TTTGGTGCTAGAGGACGGCGCAGCGGCTGTGCACTTGGCGGCCGGAGCCCGGCACCCGCGCGGCCTGCGTTGCCTCGGGGCCCTACTGCGCCAAGGCGGGGACCCCAACGCTCGATCTGTCGAGGCACTGACGCCGCTGCATGTGGCCGCCGCGTGGGGCTGCCGCCGCGGCCTGGAGCTGCTGCTGAGCCAAGGAGCGGACCCGGCGCTGCGCGACCAGGACGGACTCCGGCCGCTGGACCTGGCCCTGCAGCAGGGACACCTGGAGTGCGCGCGAGTCCTGCAGGATCTCGACACGCGGACCAGGACCCGGACCCGGATCGGGGCAGAGACTCAGGAGCCCGAGCCTGCACCTGGCACCCCAGGCCTCTCTGGACCTACCGATGAGACGCTGGACTC…	0.587043	2763
ANKLE2	FALSE	FALSE	TRUE	FALSE	GCTTGGCGCTGGGCTCTCGGTTTGTTCTTCATTTTTAAAGAAGGAAGGGTCATATGTTTATTGCTAAACTGTCAAAAAGGAATATATTCTGATTAAATTATTACTCCTCACTTTGAGGGTGTGAGAATTTTAGAAGATTTAAATGTTCTATATAACACTTAGATTTCTGATATTTTGGAAGAAGTTAGAAGTTAATGAAAGCAAACTCAGTTACCAATTTTCTGGAAAATATCCATGTGGTAATGGTAGACTTTTTAGGTGGCAATTTCTAGGTCTGAAATATAGCAGAGGAAAGGGCGCTGAGGCAGTTGCAGGCAGGCAGCCCTGTACTTACCCTGTACTCACCTCATCCGACAGACGCTGTGGATGAGGAGGGGCTTGGCGGAGGCGTGAGCACCG…	0.427257	1739
ANKMY1	FALSE	FALSE	FALSE	TRUE	ACAAGTGCTCAGATGAGGGTCTCACGGCACTCAGCATGTGTTTCCTCCTCCACTACCCCGCCCAGTCCTTCAAGCCCAATGTTGCTGAACGGACCATACCTGAGCCCCAGGAACCTCCAAAATTCCCAGTTGTTCCAATCCTTTCATCATCATTTATGGACACAAACCTGGAGTCTCTGTACTATGAGGTGAACGTGCCTTCCCAGGGTAGCTATGAGCTGAGGCCACCGCCAGCACCACTGCTCCTGCCACGCGTCTCAGGCAGCCACGAGGGCGGCCACTTCCAGGACACCGGGCAGTGTGGGGGGTCCATAGACCACAGGAGCAGCTCTCTGAAGGGGGACTCCCCGTTGGTGAAGGGCAGCCTTGGCCATGTGGAAAGCGGGCTTGAGGACGTGT…	0.605353	2055
ANKMY2	FALSE	FALSE	FALSE	TRUE	AATCATGTGAGAAAGTGTATGAATGCAAGGATGAATGAAGAATTGGGGCCAATAATACAATATATGTATAAGGGCCTACCACAGTGCTTGGCATACAGTAATATATTGTGATCAAACCTGCCAGAAAACACACTGGTTTACTCATAAGAAAATCTGTAAGAATCTGAAGGACATTTACGAAAAGCAACAGTTGGAGGCTGCCAAAGAAAAGAGACAAGAGGAAAACCACGGCAAACTTGATGTCAATTCTAACTGTGTTAATGAAGAGCAACCAGAGGCTGAAGTAGGTATCTCTCAAAAGGATTCCAATCCTGAAGATTCCGGGGAAGGAAAGAAAGAATCTCTTGAAAGCGAAGCTGAGTTGGAAGGCTTACAGGATGCTCCTGCAGGGCCACAGGT…	0.389648	1391
ANKRA2	TRUE	FALSE	FALSE	TRUE	ACACAGTCATCAGAAAATGTCTGCCCTTTTGTTTACTTCTTGGTCCTTATAAATGATAGTTTTGTTTACTTATAAATTTTTACCTCAGTTGCAATATTTACTGGTTTTTAGTAGGTTTTAATAAATATTTCTCTGAGTAATTCACTGGTTTATAATAAATGTAATACTCTTTTTATAACTATGTTTTACTGTATATTTAAAATTATAAATTAATGTTTTCGTGGCATGTAAATTTTTATGGTACAGATAGTTATCATCAGTCTTTGTATCAAGTGCTGTAATTTGACATTTTCAGAAATTATTCTACCCTAGTCATCTTCACTCGTGTATTAAGTCATTCACTTTATATAGGGTTTGCTATAAATCCCTAGAAAAAAATTGTTCTTATTGTTGAATAAA…	0.25974	462
ANKRD1	FALSE	FALSE	FALSE	TRUE	GGCAAACGACAGACTCTTAATCAGTAAATGTTCACTGGCATTTTGAAGGCATGGCCCAAGAGAAGAGACACTAGCCATAAAATCTAGTTTCTATTTATCAACGTGTTGTGAAGATGTACCTAATGAAGTTTTGAGAAAGCACAGGGTTATAGGTGTTTAAATTTCCTTTAGTGAAACTCTTATTTATTTTTATGTATTCCTGTTTATTTATTTACTGCCACGCTACTGATATTCAGACCTTCATGATCATCCATCTGGTGAGCAGAGCTTCATTTGTATATAACACTTTCAGAGCCTTCCCACCCATAGGTAGTTCTTAAACCAGGTGAAAGAGCAAAGTTCAAGTGCCTACTTATGTGTCATTCGCTCATGTAAGAGTTTTTAAGAGAGGGCTGATTA…	0.364935	770
ANKRD10	FALSE	FALSE	FALSE	TRUE	AGACGCTGACCTGGCTCTCGGAAACGCAGGAGTCCTTCCTGGTAGCCAGCTCAGAATACCCATGTAGCAGCAACTTGAACGAATGTCACAACTTGTACGTTTTTTATATACTTCAACTTTCTGAAAAAGTAAACTTCGACAAGTTCCCAGCAACTGCTTGTTTGTGCATGAGTAGGGCTTACTAAGTGCATAGATGTTTCTACAGTGAGGTGTCCTTTTTATAAGGTGCACTTTTGGAGTTTTTCTGATGCCAATCTCAACATTGTCTTTTTAATACTGTCACCAGATATTGCCATTTTTCTTTTTGTTAAAAGATTATATGATCAAGATAAATTGGGGTGGTAAATCAGGTGCCTGGTAATTTATCTCTTTGCACATGGGCATCATTTTAAAAAGCTT…	0.361896	1097
ANKRD11	FALSE	FALSE	FALSE	TRUE	GATGGAGGTTCCTAGAAGCAAGAAGAAAGAGAAGCAGGGCCCTGAGCGGAAGAGGATTAAGAAGGAGCCTGTCACCCGGAAGGCCGGGCTGCTGTTTGGCATGGGGCTGTCTGGAATCCGAGCCGGCTACCCCCTCTCCGAGCGCCAGCAGGTGGCCCTTCTCATGCAGATGACGGCCGAGGAGTCTGCCAACAGCCCAGTGGACACAACACCAAAGCACCCCTCCCAGTCTACAGTGTGTCAGAAGGGAACGCCCAACTCTGCCTCAAAAACCAAAGATAAAGTGAACAAGAGAAACGAGCGTGGAGAGACCCGCCTGCACCGAGCCGCCATCCGCGGGGACGCCCGGCGCATCAAAGAGCTCATCAGCGAGGGGGCAGACGTCAACGTCAAGGACTT…	0.581156	8151
ANKRD12	FALSE	FALSE	FALSE	TRUE	CAGTCAGTACTTCCTGATGGTATTGTCCTAAACTGGTGATGCTCAAGCATTATACTGTGGAATACTGCCTTTTGACAAAAATACTCATGCCTTTACAATTGTTAGTAAAGTTCGATTATAGTTGGTTATGTAGTAAACACTGTCATTTTATAAAAAATGAGAATTATTTTGGATCTTAGATCCAAACACAGTTTCTAATAGAAAACTATTATTTATATTGGGAAAGGTAACTATTGCATTAGAGCATGTTGGCAGACTGGTAGGTATTTAAAAAGTTGAGAATCTGCTAACAGCGCTGGAAGTTGTTAGCGCTCTAAGTAATAAGATAACCACTAGTATTCAAATCTCTTTCAGGTTTTATTAAAAAATATATATCAATAAACTAAAAGGTTCAATTCC…	0.335872	4859
ANKRD13A	TRUE	FALSE	FALSE	TRUE	ACCTTTCAGCCTGTGAGCCTCTGCACAAAGCAGAGGCTGTGGGCTGTCACAGATGCTGTGTCAACCAGGGCCCTAGGGCTAAGGGCCTGCACCTTGCGTGCATGCAGCAGGCAACAACTGCCCCTTCTTTATGCAGAGGTGCAGAACCAGGGACTCCTGGGCCCATCCAGGCTGCTCCCTGGGGTGGAGAAGGGACCAGGGATTGCAGGCCCCATCTCCAGGCTAAGGGGAGGAGAGCATCATCACTTTCCATTAGCTGTATTGGCTTGCAGGTCACATTTTTACTACCAGCTTTAGACAAAACCCCAATCCCCGCAGGTTTGTAGATAAATTTTTATCAAGGAGTGATAACAAGACAAGTTATTGCAGAGTCAGGGTGCTTTTATATATAAGAGCAGC…	0.435038	2209
ANKRD13B	FALSE	FALSE	FALSE	TRUE	CGCCCCCTGCCGGGACCCTCGCCAGCGCCACGCGCGCCACGCCCAGGGCCAGGAGCCAGACAAACCCCGGCCTGCGCGCCTGCAGAGCGGCGGCTGGAGACTGGAGCCACCGCCTCGCGGGTGCAGCAGCACAGCAGGCACGGTTCGGGGAGGGATTCGGCATGGCCGCGGGGTACCTTCCCAGGCCAGGGCCCTGGAGGCAACTGGCACGGCCTGGTCCCCCTGCTTTGCTGTATTCTGATTCCCCAACCCGCTCCCCTGGGCTCAGATCTGTCCTGTCCTAGGGCGGAGCCAGGCGGTCCTGAGGGGGAGATGAATCCTTAGAGGAGCGCTGTCCCTATCCCTTGCTCCTTCTGGCCGGTCCGCATTTCTGTTCACTAACCCCACTCCAGGACACTG…	0.631043	1179
ANKRD13C	FALSE	FALSE	FALSE	TRUE	CTGACGTGGAAAAGGATGCCGTCTAACCAAGGAAAGAAAATACAGAGACCCTAGAAGTGGATCCAAATAGAAGGGACAAATGCTTTCAGTGAAGAAAAGGGAATTACACATTGAATCGACACATCAGTAATACGATACAGTGAAATGGGCCTCTAATAAGAATTTCAGCGAGTTTTCTGATGTGCCATTTTTTGTCTTTTTAAAAATATACATATTATAAATGTAATAGTTTGACACATTAATGACCCTAAGACCTGCGTATGTGAAGCAGCTATGAGTGCTGTGATTTGTTTTTAAAAATTTTTACACTTCTTGTTGAAATATATATGCATATAAATATATCTATATCTATATCTATATCTAAAACACTCCTGGACCATTAACGTAAATTAAATGTCT…	0.308126	2129
ANKRD13D	FALSE	FALSE	FALSE	TRUE	GGTCTGAGAGCTGGCTGGGGACTTGCCTCGGGACAAGGGCTCTTGCAGACCCCTCTCTGGGCCTGTCATAGTTAGGGACCCACTCCCTCGGCTGGCTTCTCTCTGGACTCCACTCCTGGAGGGCAGGAGTCATGTCTGCCTTATCCATGGTCCTCAGCCCTTAGCAAGGGGCTTGGCACAGAAAACCGGTAGTTTGTCTTTGATGAATGGATGGTGCCACCCATGTATGGTTTTCTATTGAATTTCATGAGTACCTGCTGGGGCCAGCGTGGCACAGTGGGAAGGGCCCCCAGCGACGTGGCCTGGGAGTGGAGCGTCTGCCTTGGTGGAACAGAACAGTTACGCTCTTGCCTCGTGAGGAGCCTTGAGCAGGTTCAAGGCAACACTGTGGCTGAGTGA…	0.581213	511
ANKRD16	FALSE	FALSE	FALSE	TRUE	GGATGTTTCCAAGAGGAGGCAATAAAGTGCATGAGTTGCTGGGAGCCTGAGCACCTTTCGTTTTTCGGCTCAGAGAAAGCCAAGTGCAACTTGCTTCAGTCATCCTGAACCTGAGTTCAACCAACCGCAGCCACCTACGTTTGACCCCAGCGAGATCAAAGTTGTATATCTGAGGTGTACCAGTGGTGAAGTCAGTGCCACATCTGCACTGGCCCCCAAGGTCAGCTCCCTGGGTCTGTCTCCAAAAATGGTTGCTGATGACATCACCAACCATTGACTGGAAGAGTCTGAGGATGATAGTGAAACTGACCAGCCACAGCAGACAGGCCCAGATTGAGGTGGTGCCTTCTGCCTCTGCCCTGATCGTCACAACCCTCAGGAACCACCGACAGAAAGAAA…	0.475632	1108
ANKRD17	FALSE	FALSE	TRUE	FALSE	TGAGGATCAGCTTGTTAGCCTGCAGATTCCTTTTCATTTGGAGGAAATCACAAGTGGCCGAAAAAAAAAATTATGCTCCCAAATCATTCTACTGATGTGCTTGACTGAAGTGTGTAGGCTTTTTGCAGAAGATCTTACTAACTGACCTATTTTCTGTGAACATTTGTGACTGCCCATTCCCCATCATCATCCGTTTTACCTTAGTTAGCATTTTTCTTATCATTTTTCTTTTTTTCTTTCCCTCTTCCCCTTTGGACATAACTTTCTGTTGAAGCTGTTCTTTGGCTGGTTGGTTTTAGTACTGTAAACTGCTTCTGAGCAAACACGGAAATTTAGCAAAATTATGTAAACTTGATCCTGAAGTTTTAGAATGGCAAATAAATGTACAATTGTTTACAT…	0.303327	2855
ANKRD18A	FALSE	FALSE	FALSE	TRUE	ATTTAGGTTTATTTTAGTAATAAAGTGTAAATAGCAAATGGCATTCCTTTTCATTGTTGGGTTAGTAGATACTATATTCAGTATCTTTTTCTTACACACATCTAATGAAAGATGTGAAAACGAAAACTTTCACAGTGAAGAGTATACTTATGCATCATTAATTCATCATGTTCCATAGCTTAAAAAATTCCCAAGAAGTGGATCCATCTCTTTTTTACCAGCTCTACAATTTGTTCACTTTTGCCATCCTCATGGAACTGTCAGCCAGCACACTGAAACGATTCTCCAAAAACAAAGGCATCAGTTGGCTTACATCTGTTCTCAGGAAAAGTTCCAAAAATTTCACCATGAAATAAAAACACTCACATCAATGTAACTCTTGTCAGGTTACTCAGCCTT…	0.356471	1700
ANKRD18B	FALSE	FALSE	FALSE	TRUE	ATTTAGGTTTATTTTAGTAATAAAGTGTAAATAGCAAATGGCATTCCTTTTCATTGTTGGGTTAGTAGATACTACATTCAGTATCTTTTTCTTACACACATCTAATGAAAGATGTGAAAACAAAAACTTTCACAGTGAAGAGTATACTTATGCATCATTAATTCATCATGTTCCATAGCTTAAAAAATTCCCAAGAAGTGGATCCATCTCTTTTTTACTGATTCTGCAATTTCTTCACTTTTGCCGTCCTCATGGAACTGTCAGCCAGCACACTGAAACGATTCTCCAAAAACAAAAGCATCAATTGGCTTACATCTGTTCTCAGGAAAAGTTCCAGAAATTTCACCATGAAATAAAAACACCCATGTCAATGTAATTCTTGTCAGGTTACTCAGCCTT…	0.349291	1692
ANKRD20A1	FALSE	FALSE	FALSE	TRUE	GAAAAAATCCTTCGCATTTCTGGTATAAGAATTTAAACTAAAAGAGGAATGAAACAGTTTTCTATCCACAATATTTGTGAGGATGTTTTATACTGCTGCTTAAAGTTGCTGATTACTTTTCAAAGTACTCATTTGAAAATGAACTGCTCTACACTTGGCCTGTACCAGTGGCCATGTGCAAGTGGTCACTCTCCTGGTTAACAGAAAATGCCAGATTGATGTCTGTGACAAAGAAAACAGAACGCCTTTGATACAGGCTGTCCATTGCCAGGAAGAGGCTTGTGCCGTTATTCTGCTGGAACATGGCGCCAATCCAAACCTTAAGGATATCTACGGCAACACTGCTCTCCATTATGCCGTGTATAGTGAGAGCACCTCACTGGCAGAAAAACTGCTTTC…	0.377069	846
ANKRD20A2	FALSE	FALSE	FALSE	TRUE	ACATTTGGTTCTGGATACATGTTGAACTTAGTTGAATATAAAAATCTAGATTAAAAGTGTGTTTACCATACTGTATAATTCCATTTACATGAAGCATCCAGAAAAGATAAATGTATAGGGACAAAAAGTAGATTCATGTTTGCAAGGGGCTGGGGCTGGAAGCTGGTAGTGACTGCTAATGGGCATGAGGAATCTTACAGTGATGGAAATGCTCTAAAGTTGGATTGTAGAGATGGCTGCACAACTCAGTAAATGTACTAAAAATCTTTTAACTTAAAACAGATACATTCTATAGTATGTAAATTATATTTCAACAAAGCTGTTTTAATAAAAAAAGGAAAAATGTGTTTACTATATCGGCTTAGAAACATGCCTCATTTCTAGGAAATAAAAGATAGA…	0.292341	927
ANKRD20A3	FALSE	FALSE	FALSE	TRUE	ACATTTGGTTCTGGATACATGTTGAACTTAGTTGAATATAAAAATCTAGATTAAAAGTGTGTTTACCATACTGTATAATTCCATTTACATGAAGCATCCAGAAAAGATAAATGTATAGGGACAAAAAGTAGATTCATGTTTGCAAGGGGCTGGGGCTGGAAGCTGGTAGTGACTGCTAATGGGCATGAGGAATCTTACAGTGATGGAAATGCTCTAAAGTTGGATTGTAGAGATGGCTGCACAACTCAGTAAATGTACTAAAAATCTTTTAACTTAAAACAGATACATTCTATAGTATGTAAATTATATTTCAACAAAGCTGTTTTAATAAAAAAAGGAAAAATGTGTTTACTATATCGGCTTAGAAACATGCCTCATTTCTAGGAAATAAAAGATAGA…	0.325362	1380
ANKRD20A4	FALSE	FALSE	FALSE	TRUE	ACATTTGGTTCTGGATACATGTTGAACTTAGTTGAATATAAAAATCTAGATTAAAAGTGTGTTTACCATACTGTATAATTCCATTTACATGAAGCATCCAGAAAAGATAAATGTATAGGGACAAAAAGTAGATTCATGTTTGCAAGGGGCTGGGGCTGGAAGCTGGTAGTGACTGCTAATGGGCATGAGGAATCTTACAGTGATGGAAATGCTCTAAAGTTGGATTGTAGAGATGGCTGCACAACTCAGTAAATGTACTAAAAATCTTTTAACTTTAAGTTAAAACAGATACATTCTATAGTATGTAAATTATATTTCAACAAAGCTGTTTTAATAAAAAAAGGAAAAATGTGTTTACTATATCGGCTTAGAAACATGCCTCATTTCTAGGAAATAAAA…	0.325145	1384
ANKRD22	FALSE	FALSE	FALSE	TRUE	TCCTTGTGACCACACCGATGGAGATACAGAAAAAGTTAACGACTGGATTCTATCTTCATTTTAGACTTTTGGTCTGTGGGCCATTTAACCTGGATGCCACCATTTTATGGGGATAATGATGCTTACCATGGTTAATGTTTTGGAAGAGCTTTTTATTTATAGCATTGTTTACTCAGTCAAGTTCACCATGGCCGTAATCCTTCTAAGGGAAACACTAAAGTTGTTGTAGTCTCCACTTCAGTCAGAAACTGATGTTTCAGCTAGGCACAGTGGTACATGCCTGTAATCCCAGCTACTTGGGAGGCTGAGGTGGGAGGATCACTTGAACTCAGGAGTTTGAGAGCAGCCAGGGCAACACAGCGAGACCCTGTCTCAAAAAAAAAAAAAAAAAAAAAAGCC…	0.400494	809
ANKRD23	FALSE	FALSE	FALSE	TRUE	CCGCAGCACCGCCCCCCGCCGCGCCTTTCGCACTGCCACCATTCCATCCTGTGCCCCGCCCCCGCGTCTGCACCTCTGTGGTTCCTGCCCTCAGCCCTGGTTCCTCCCTCTCTGGCCTGTGCCGCCTCAGCAGCCCTGGCAGAACTGAAGAGCGGCACCGGGCCCAGCAGGCAAAGAGAGAGGCCTCCCTGGCTTCGAGTGTCAGGGGAGCCGCGTTCCCTCCCAGGGCTGGAGCAGAGGACCACAAGGCAGCAGAAAGCGCGGGTCCAGATGAGGGCCAGGAAGGGGAGGAGAGTGAGGGCCAAGAACGAGCCTTAAGGGAGCAGTCCCAAGCTGGAGCCACCCAGGGCTGGGTCTGGGAGTCCTCAGTGTCCACTTGTCCCAGGTTAGGGGGCTTGC…	0.599878	1637
ANKRD24	FALSE	FALSE	FALSE	TRUE	GAAAGGCCAGGCCCAGTGGCTACACTGACCACACCCACGCAGGGACCTCACCCCCCTGCAGGCCCCTTGCAGACCGGCTTCACTTGGCTTCACTTGGCCCTATCCAGGCCCATGCACTTGGAGACCAGCCTGGTTCCCTGCCCGACCACCCCCAGCTGGCTCCATCACCCCACCTGGTCTCTGCACGCACACACTGGTCAGTCTGGACCCGGGCCGTGACTGCCCCTCCCCCACCACCGGAGACTGTGATTCCCTGTGTCCTCCACATCCAGACGCCAGCCCAGGAATAAAGGCATTCTGTGCACAGGG	0.644013	309
ANKRD26	FALSE	FALSE	FALSE	TRUE	AAGATAAGATTTTATTACTGGGCTGTTTATGTGACATTTTGTTTCTCATTAAATATTAATATATGACATGTAAAAATATTAAAGGAACGTATTTTTGTATCATATATGTCAGATCAAAATTTATATAGTATTTTAAACAATGTTACTTGGCTTCTTTAACTTTTAAGTGGATTTTGCCAATGAAAACCAGGAATATTGAGTTTTACATACTCAAACTGCCCAAATGTGAGCTGTTTAAACAGCCAAACCACTAAGTTGTCATTAATACTTTAGTGCAGTTAATTGATGGCTTATTTGTATTTTGTAATTTTTATCACTATATGTAGTGGTAGATGTCTAATTGGACTTAGACATCATTTTGTTGTGCAGGAACTGTGGTCATTGTTCATGTTTGGATGT…	0.313433	1474
ANKRD27	FALSE	FALSE	FALSE	TRUE	TAGGGTGCTGGGGTTGGTATGTGGGCAGACGGATTCTTAAATTGCCTCCCAGGAATGGGGCCTCAGCTGTTTGAGGGCTGTGAGTCTTAAAAATCACTCAGTGAAGAGAACACCAAGCCCTCAATTGGTGGTAAAAATTGGTGGGTTATCATTGGGATTTACATTGTTAATATCCTACTTCATTAGTCCCCATCCTCTCCAAAGACATGTGGGTGCAAAGGGAAGCCAGAAGTAGGGAATTTGGATTTCTTGACCTTGATAGTCAAGAAGTGATGTCACGGGATCCCTGGACTGTCGCTTTTCCAGCCGGAAACCTCTGTGGCTGGTGGCTCCTTTGCCTGAGTTTTGTTCGGGCCTGCTGGGCTCATTTCACGCTCTTGGCCTGGCAGGCTGCGCTCG…	0.557942	2002
ANKRD28	FALSE	FALSE	FALSE	TRUE	GAGGCTGAGGAGGAGGGAGTTCTCACAGTAAAGCTTCAAACTGTGCTTTTTCAGGAAAAAGGCACTTTGATATTCACGTAGAAATTCAACCTAAGAGGAAAGATCCCACAGTGAGCCAATGTTAAGAGATCTGATGGCATTAGGAGGAAGAGTTTTAAAGGCAAGTTTTACAAAAGGAACTTCTAGAATCTTGAAATAGACCTGACTGAGGAAAACACATTGATGTCAGAATTCTTTGTGGAATTGTTTAATTTGGTTTTGCAGTGCCAGGAACAATTGGGGACACTGTGCACTCTAACCTGCTTACACAAGCAACACTATTGTAACAGAAGAAATAAAGACACTAGATTTAAATTTTATCAATAAAATTACAACTAAATTTAAAGGCAATAAAAGTTT…	0.346407	3034
ANKRD29	FALSE	FALSE	FALSE	TRUE	CTTAGCTCCATATTTGACAGAAAGATAGAAAGCTTAACCACATTGTCCAAAAAGAAATTGCATTTCAAGCAGTGTTGGAAATTCTTTTATGAAAAAAAAAGATGCCCAGAATGCCCATCCTGTGGGTCCCTGACAAAGAAGAGCTACGCTCTGTGCACGAAGTCAAGAACCAAACAGCTCAGGGACCCTCTTGCCCCTTCACCATGGACTTCTCATGGTGTCCTGTAACTCATCTCCCGGGGGGCCTGGCATGTTCACAGATTCCACAGAAACTCATTTTCAACAATGCTAACTTGGACCTGTCAGTTAAACTCTAAGGTGGACAGGGTTCTCAGTACTAAGCAAGGAGACAGAATGCTTTGTTCCTTTAAAAGACTGAAAAGCTGACCTTCAATGGAT…	0.34087	2300
ANKRD30B	FALSE	FALSE	FALSE	TRUE	AGCCTTAGAATTAAAGGACAGAGAAACATTCAAAGCAGAGTCTCCTGATAAAGATGGTCTTCTGAAGCCTACCTGTGGAAGGAAAGTTTCTCTTCCAAATAAAGCCTTAGAATTAAAGGACAGAGAAACACTCAAAGCAGAGTCTCCTGATAATGATGGTCTTCTGAAGCCTACCTGTGGAAGGAAAGTTTCTCTTCCAAATAAAGCTTTAGAATTGAAGGACAGAGAAACATTCAAAGCAGCTCAGATGTTCCCATCAGAATCCAAACAAAAGGATGATGAAGAAAATTCTTGGGATTTTGAGAGTTTCCTTGAGACTCTCTTACAGAATGATGTGTGTTTACCCAAGGCTACACATCAAAAAGAATTCGATACCTTAAGTGGAAAATTAGAAGAGTC…	0.412399	1484
ANKRD33	FALSE	FALSE	FALSE	TRUE	TGAGTCTCCTGCTCAACTACTATGTGGGCCTGGACCTGGAACGCCGGGACCAGCGGGGGCTCACGGCGTTAATGAAGGCTGCCATGCGGAACCGCTGTGAGTGCGTGGCCACCCTCCTCATGGCAGGTGCTGACCTGACAGCAGTGGACCCTGTTCGGGGCAAGACGGCCCTGGAATGGGCAGTGCTGACCGACAGCTTCGACACCGTGTGGAGGATTCGGCAGCTGCTGAGGCGGCCCCAAGTGGAGCAGCTTAGCCAGCACTACAAGCCCGAGTGGCCGGCCTTGTCCGGGCTCGTGGCCCAGGCCCAGGCCCAGGCCCAGGTTGCCCCTTCACTCCTAGAACGGCTGCAGGCTACCTTGAGCCTCCCCTTTGCCCCGTCTCCTCAGGAGGGGGGTG…	0.628407	697
ANKRD33B	FALSE	FALSE	FALSE	TRUE	GGGCCCGTGTGCCTGGCGCTGGGGCCGGGGCTGGGGCCGGGGCGGGGCCGCAGGGCTGGGCGCGGAGAAGGAGGCGGCCCCGTTGCGCATCGCACCACTTCCGCTCCATGGACCACGGGGCTGCGCGCATTTCCAGGCTGTTTGTCCAGGCTGCTTCCAAGAGAGGGCTGAGGGAGCCACATGGATTCGCTTGTCGCCAGCCCTCCTAGCAATCAGTACACCTAGCGGGCACGTTGCCTAAAAGGCTCCCTTTAGAGAACCTCAATTAAGATTTTTTTTAAAGATCAATTTATCAAAGGGCGTTTTCTCCGTAATTTTGTATTTTTAATCATTATTTATCAAATTTGCAACGTTTTACAAGTGATAGGGCCCCTTATATCCAAGGCAGTTTTAATACAC…	0.492925	7703
ANKRD34A	FALSE	FALSE	FALSE	TRUE	GAGGAGTGAGAGGAGCCAAGGAGGGTGGGGATTAGGACCTTAATGGGATAGGTGGGAGAACCAGCTCACACACACACCACGAACAAAGGGATCTCTTGCATGTGCTCATGGGTGCACAGTGCACCCACACATGGTTAAACATGTGTCCATAAGCACAGTACTCTTATTAGCAAGAAAGAATAAGTACTCTATTTACTGGGTATATACACACATGTATTCATGCCCTGGTCATTTCACATGCATATGGGATTACTTGTGTACCTACAGGCACAGCATATCAATAAACACACAGGGCTAGGGTCCCAAACTCTCTTGCATTTGTTCAGAAGCAGTAGGGAACCCTTACTTATGGGCAGTCTCCGATGTCTTTGCCCTCCTGCAGAAGCAATCCCTTGCTTT…	0.475212	827
ANKRD34B	FALSE	FALSE	FALSE	TRUE	GAGATGGGTATAAAACACATCTTCTTCAAATGTTTATATCAGAGAAACAAAGAACTAGAGAAGAAATCTTAAATGTTCATTCTTTTAAATCTCGTGATTGGTTAGTCCATAATGGCTAGATGGATTAAAATGTAATGTGATTTGTACTAGGCGTCATGAGCATAAAAAATAATACATAGTTTCTGTTAAGGGAATTCTCTCAAACAAAAGGAAAGCGATTTTTCTCAATGCTTCTAATATTTAACAATCTCCATGTAGTCCAAATTTGTCATTAAAAAAAAATCAAAGAAAGAAGGCCACGTATGTTGGGGTAATTTTTAAAAATTTTCAGATTGGCTAAATATTTTATTAGGAAACAGTTTTCAAGTCAATAATTTTTTTAACATTTCATGTTAATAA…	0.275	1720
ANKRD35	FALSE	FALSE	FALSE	TRUE	GGCAGCCTCACTGTGTGCCCTCAGGGATACGAGATTCTCTGTTGGAATAAGAAACCCTGGTTGACAGAGGCTTCATCAGGCTGTGGTGGGCGGGGGTGTTGGCCACTAGGCAATGGTATGGGCAGGGCTTCACCTGACATTATGGACCTCAGACCTGAGAACCTGGACCCTGGAATCAGCATGGATGAGACCAGAGGAGGTATGGATGGAAACAAGCTCTATGGAAAATAAAGCATGAGGCAGGACGGG	0.538153	249
ANKRD37	FALSE	FALSE	FALSE	TRUE	TGTCACGTGGGTTATGAAGAAGTCTGAAGAACGCCTTCATTTCATGCAAATCTATAAGCTCCTGCTTTTGGCTTTACCATATGTTGTGTCTAATCTCCTTCTGAGAAGGACGAAAAACTTTCTTCCAAGTGAAGATCCATTTAAGAACACATGTATTTACATGCCTATAATATGCTGGTTGTGTATGCTTTGTCTTTTAAGTTATTAAAGGAACGTCTAAAAAA	0.357143	224
ANKRD39	FALSE	FALSE	FALSE	TRUE	GCCGCCACCCTATCTCCAGCTGCCTTTAAAGGGTAAGTGGAGAAAGAGTTGAAGGGAAAGTGTTGGGATTTGGACATGGAGTTCCTGACCCTGGAGCCTGGCCTAGTGACTGGAGGAGGGGCCCCCAAGAGGCTGTGGCCCGGGAGAAGCTGAAATTGGAAGAAGAGAAGAAGAAGAAACTTGAAAGATTTAACAGTACCAGATTTAATCTGGATAACCTGGCTGACTTGGAAAACTTGGTTCAAAGACGGAAAAAGCGACTGAGACACAGAGTCCCCCCCAGGAAACCTGAGCCCCTGGTTAAGCCGCAGTCCCAGGCCCAGGTGGAGCCTGTGGGCCTGGAGATGTTCCTGAAGGCAGCTGCTGAGAACCAGGAGTACCTGATTGACAAGTACTTGA…	0.5513	4386
ANKRD40	TRUE	FALSE	FALSE	TRUE	TGCAGCAGGGACTTTTATCACTGAGTATTATGACAGTGTGCATCACCTCTGGGCCAAGGACAAGCCATTGATCTAAATGCCTCAGATGCCCGGGAGGGCCTCTGGTGCCACTGCATAGTATATACTAACATCATTCTGCCAAGGTAGGAAGCCCCTGACCCCCAAGCAGTGGTGCCACTCTTCCAAGCCTCTTGGTGCACAGTAAACCTATTGCTTGAAGCTTTGAACAGCTGAGAAGTGGTCTGGAGAGGCAGAAGCTGAAGGTTCTATATCCAGTGTGTTTTATGTCCAGAATGTAAGAGAGTTGTCTAAGCAGCAGCTGAGAGAGAGCGGAGCCTATTTCTAGCCACTCCTGTTGACAGTGCACCTGAAGGGCTGGGATGCGTTTTTCTTGGTGTT…	0.424296	2807
ANKRD42	FALSE	FALSE	FALSE	TRUE	ATCCCTGTGGAGCCTCTGATTCCTTGGCTTGGCATGCTGGACTTACATAATTTGGCACCTACCTACCTGCATGGCCTCATCTTTCTATATCTTTACACTACTGTCCAGGATCATTTTGTTTTTTTCTGAAGGTCGTCTTTCAGTGTTCATTTAGTGAAGTCTTTTGGTATGAACTCTTTCAATTTTTGTGTATCTGAAAATTTATTTTGTTCTCATTCTTTTTACTTTGTATTTTGTAAGTTTTTTTTTTTAAAGTAAAATTTAAATTGAAGTCTCAAAAAACAAAAAGCCCCTCTCTCGGCGCTGCCTACGGAGGTGGCAGCCATCTCCTCCTCAGCATCATGGCCACCCTCAGACCCCTTGTGAAGCCCAGGATCATCAAAAAGAGAACTAAGAAGT…	0.363421	2537
ANKRD45	FALSE	FALSE	FALSE	TRUE	ACATACGTTCTGTAAAAGGCCACATTTTCTTTTAGTATCTGAAAGGCAAACCTATTCATGCCATTTGAAATCGAGAAAACAGATGTGGGTTTCTTTAAGTATTTAAGTACAACATTACATCGCCCTTGTTTTGTTTGACCTGTTCAGCATGCTTATGTCCGGACTCTGGCCTCGCCTCTGCTCCTCCAAGCACAGCCCCATGTGAGTTTCACGTGCTCCTTCAGGAAAGCACTTGGGTATAAATCATTCGTGAAGACCATGTGGAGGCTTTAAGAACTACTCAGAGAATCTAATAATTTTCTGTGTAATTGAGGCATTCCATATAAAAGGACATATTTGGCTATTTCCAGAGAAAAAATTTGTTCTCCCTGCCTAAAAAGGAAATCTTATGGAATGACA…	0.383562	584
ANKRD46	FALSE	FALSE	FALSE	TRUE	AGGAGCTCATGGAAGATGAGGCAATTAATTGCCTGTTTCCTGGCTTCCAATGTTTGTTCTCAGTTTCTCAGAATTTTTCTTAGCGCAAAGCAGTGAGGGCAGTACATGTTCTTTTTGCATTTTTAATTATTGTAATCCTTTTAGATAATGATGTGTTCATTTGAACTAACTACATACTATGATCAAGTATATTGCATCCTAACGCTACCTCTGACTCAACCTGACTTTGTAGGAAAGCCTACACGTAGCCTTGTTTGATAAAAACACGGAAGTGACTAGAGAATGGAAGATAAAGGAAGAAGCTAGGAAGTCCTTGCTATCAAAACCTTATCCTAATATAGGACCAATTGAAGTATTCAAAAAGAAAAACAGTATCTTATATGATTAGTTTTTGTTGGT…	0.318564	1783
ANKRD49	TRUE	FALSE	FALSE	TRUE	GACAATGTACATGAAAGCACATATTAAGCTGCAAAGTGTCATGCTAGGTATTATTTGGGGGTTTAAGGATAATTATCTATAAAGATAGCAAGCAATCATCTATATTTTAAAATCATTTATATAAAGTCATTAGGATCATTTAGGAAAGAGAGGATGGAAACTAACATTTATTAAAAACTAACTATACCAGGTACCTTATTACATTATTTTATTTAATCATCATGTATCCCTATAAGTAATATTCTTCTCTTTTATAGAGTAAGAAATTGAGATTCAGGAATATTAATTTGCCCAGGATCATCGAAGTGGAATGAACATCAAAAGCCTATTCCCTCTGCTTGGCCACTTCCACCTCATTTTACTAAGTTTCCCCATGTCTGTGTTAGTAAACTAATAACT…	0.348364	2506
ANKRD50	FALSE	FALSE	FALSE	TRUE	AAGTTTCCTATTCTGTGAAACAGAAGACATTGTGATGGAGTGGTTCTTCAGCTACTGGATGGAAACATATGCCTGTTGATTTGCTGAAAAAACAAAAAAAATGAAGAATGTGATCTCTGCAGTACAGTTACCTTAATTACTGTAATGTGCCTAAATAGTAAGGCTGCCTTCTCAATGTAACCCTCTGTGCTTAAAAAATTTCATTTTGTGTGCTTTGTATTCACTACACAGGAATAAGCACTTTTTAAAAATGCAGATACATACTGCAGTTCCCTGATAAAAGCTGAAAAGAAAATTTGAGTATTTTAAGTTAAGATGTGATAAAAAATGTGCATGTGCCATAATCAAATATATATGAAAAGGCAGTGTTCCTTGTATTTATTTTTTTTTCTTTTTGTG…	0.326601	3466
ANKRD52	TRUE	FALSE	FALSE	TRUE	CCCCCTCCAGTGTCCCTCCCCCGCCGGTGGCTTGATATCTAATTCTATTTATTTAGAAAAAGTCTAAACATTTAGGGCACTTTAAAGGAGAACACGACTGGGTGGAGGGGGCGGAGGGGAAGGAAGCCCTGGGGAGCAGCTGCTCACCCCTTTGCCACACCATCTTGGCCTGGCAGGGGTCTGGGACTGACAGGGAGCACCCCAGGCCCTTGGTACCCCCAGGGCGACCCCTTCTGCCAAGTGTCCCAAAATGATTGCTAAATGCCTGGCTCCCCCACTCTTTGACTCCATCTCTTGGTTCCCTCTTTCTGCTGCCAGCTCCCCCGACTCTTCCCTGGGGACTCCTCTCTGTGTCCCCCTTCTCCCCTGCCCCTACTGCCAGGCAGATCCCCTCTTCTT…	0.557826	5335
ANKRD53	FALSE	FALSE	FALSE	TRUE	AGAGCACAAAATTCTCAGAGAAGCTGCTATCAGAAAGTGGCTCCACGGCAAGCTGCACCCAGGCCACTCTCTGGTCTCCAATACCAAGCAAGCCCGGGCCACCGCCCTCTCCAAGACCCCAGAGCAACGGGAATCGCAGCGTTCCAGGAGCTTCCACCCCTCTGTGGATGCACGCCTGCAATGCATTCCACAGCCCACGGAGATGCCCAAGCCCATCTACAGGAAGCCCACGGTCAAGCGGCCCACAATGTGGAATGTTAGCAACAACCCCGCCAGACCCCCCACCACCCAGATCAGCCACTCGCAGGGCATCCGCCTGGGCGTGCATCCAGACCCCACTCCGGAGCACGACTTCAGCAGCTTCCTGGAGGTGAGGCCTGATGGGCACGGCGGTGCGCG…	0.604284	887
ANKRD54	FALSE	FALSE	FALSE	TRUE	CAAGAGAGGCTCCCTGCCTTCCTGCCACTGCCCCACCCTGCCCCACTGCTGTCTCAGTACCAAGAAAAAGCCCAACATCTGGGACTTGGAGCTGCACTTGTCTGGTGAGGACCTTGCCCTCACCCGCAGATGCCGTGGGGCAGAGATGCTCTCTCTCCACGGCCTCAGAGCCACTCCCAGCCACAGTTTCCAGCATCTCTGTGGACAGGGACCACAGCTCCCAGCTTCTTCCAGTTCTCGCAGCACCAGACCAGCCTCTGCAGCTGCACTTCAGCTCCGCAGACCTGCGCTATCTCAGCAGACCTCACTTGCCCCATGGCCTTCATGGCGCGCTCCAGGCCTCAGACCCTTCTCTGTGTTCCGTCCTGGCCATGGGCTTGTTGCAGTCAGCAGGTGTGG…	0.546875	1088
ANKRD55	FALSE	FALSE	FALSE	TRUE	CTGTGGGCCACTCGCTGCAGAAATGTAGATGAATATGTATTTTCAACTCTCAAAGGACAAGATTACTCCAGTTTGTAAGAACGAAGACCAATTTAGTAAGCTGCATTCTATAAGCCATCAGTTTTATAACTCGAAATTCTTTATTCCAAATAAAGATACTCCCTAAATAAGCACTTAGAATATTTGGGTGTGCATATTAAGTCTGTGAATTTCTGTGACTTCCACATGCCAAAATTAAAAGACAAAATATGTTATCAGTAGGAAAACTGAGCTATGTTTGGTTTGCTTTGTGGCATGTGCACTGTTTTTTTGTTATTGTTCTTTGGTTGTTTTTTTGCTGAATGATTTTATGTTTTGGGAAAAAAAGTACGCTTTGCTGAATAAAAGCAAAAAACAAAA…	0.322772	505
ANKRD6	FALSE	FALSE	FALSE	TRUE	CACCAATAAAGAGGAAATATGAAAGGATTCTTGAAGATTTCCAGTTTTGCAACTGCATAATAGCTATGCCCAAGGAGTCAACTATTGTATATATTGCAGATTTGCCTTTTTAAAAAAATCACTAATTCTACAATGTGCCAGATACATGTTTCCTATGCCCAGGAAGTTATGAAGACTTCAACAATTAAACTGAAACCAGGGGAAGCTTGCTTAGTTTTGGGTTTCATTATAAACTCTTAGCCTCAGTCCAGGTTAATCTGAAGTTTGAAAGCTCAGATTAAGCAAGCCATGCCAAGAAACTGGACGATGTGTAAGCCTAGACTCTAAAATTCAAGATGTGTGAAATAATATAAGTCAAAAGCAAGAAAAACGTAATCCCGTCTGAACTCAAGTAGTCAT…	0.35053	2830
ANKRD7	FALSE	FALSE	FALSE	TRUE	ACACCTTATTCTTGGCACTACATGTGACTAAAGGAAGATATGGAACCCATTTCTACAATTTCTTTGCCGCTTCCTTGAATTGGAAAAATGTACTTTGAAAGAACCGTTAAGTGAACTATTATAATATTTTTGCTGACTACCCAGTTGAAGAAAAGTTTGTTAATTGGATGGGATTTTTTTTTTTTCACGTTAGAAGACATGAAGAAATTTTAAAAGATAAACATCTATATTGTGAACCATCAGCTGAAAAGATAAATTTGTGTTCAATATATAGGCAGAAAAAAATTTGTGTCAAAATGTTGAATGGAATAATAATGAGGAAACTGTGTTAGGCATGTATTAAAACATTTAAATAAAATAAAAATACATTTCAGCTAC	0.291005	378
ANKRD9	FALSE	FALSE	FALSE	TRUE	GCCCGGAGCACCCTAGGCGCTGGATTTTGGGACAAAACTATTTTTCAGAGCGTTGTACCGGCACTTTATATATATTGATCTCTGTACGGCACAATCTCTGCCTCATCTGTCGCATGCACTGGGGGCTGGGCTTGGATGGTCAGGTGAGTTCCAAGTGGCAGGTTTTCTGGGTGCAGCTGGGCTCGGGCCTTCAGCTCGCTGTCCAGCCCCTGAAGGGAGTGAGGACTAACCTCCCACCTTGATCTAGAGCCTCGGACAGGTGTGCGTCCCAGATGGGTGACAGCTGAGTGCCGCAGGAGCTCGGTAGGTGCAGGGGTGGGGACTGGCATGTCCAAGCAGCAGGACAGCGTATAAAAAGGCCTGGAAGCCAAGAGAACGAGCTCTGCAGCGTAGGGTTCT…	0.542697	5176
ANKS1A	FALSE	FALSE	FALSE	TRUE	GCCACTGAGGAACCACACTGTGCTGCGGAAACATAGACGTGGGGGCATAGGCTCCCACTGCCACCACCGCCATCGCCTCACCTGCAGCTCTGAAGACCCAGGCCTCACCTCCGCCTGCAGGACCTCCTCTTGGCCACTTGGCCTGGGCCTGCCACCACCACGTCCTGCAGAACGAGCCCTGCCTTGGCTGTGGAGAAGCACTCCAGGCCGCTAGCAGATGGGACTGGCATTCCAGAGGGTCAAGAAGTGACTTGTTCAGAACACATTGTTTTTAACAGAAAAAAAATCTTTTTATAAAATGAACTTTTAACACTTGGCTCAAACCTCTAGGTCATACTGCCAATCTTTAGACAAATGGCCATGGGGCAGAGGACAGGGGAGCTGAGGTTGGTTCAGAGG…	0.511412	2804
ANKS1B	FALSE	FALSE	FALSE	TRUE	TACTCGCCGTCCTCCTGTCCTCGCGGTGCCTTGCTCGCCAAGCGGTCCCGGAGCAGGCTTTCCTTCGCGCCTCCGCGTCCACCCAGCCCAGGAGGAAGACTGCTCTGAGCGTGCGGCCTTGTTACGGGCGAAAGGCCACTGGCCATTCCTGGGGAAGTTCTTTCTGCACCAGTGATGGAAAACGCAAGACTTTCCAGTCGCAACCCCTGAGAGGCGTGAGTTGAGATGGGTTTTCCCTGATGCTCCCGACTCCCCTCCCCACCACCTCCCAAGGTATTTCTGATGACTCCGCCCCAGTACTTGCTTTGCTTCATTTGGGGAAAATAATACCTTTTCTTTAAAAAAAAAAAAAAAAAAAAAAAAGTAAAGGGGATCTCTAATACTGCCTAAAAGTATGCT…	0.349575	1765
ANKS3	FALSE	FALSE	FALSE	TRUE	AAATGAAAGACATCCAGGGCTGGACAGCCCTCTTCCACTGTACCAGCGCCGGGCACCAGCACATGGTCAGGTTCCTCTTGGACAGTGGAGCCAATGCCAACGTGAGGGAGCCGATATGTGGATTTACTCCCTTGATGGAAGCAGCTGCTGCTGGCCATGAGATAATCGTGCAGTATTTTCTGAATCACGGAGTCAAGGTGGACGCGAGAGACCACAGTGGAGCCACAGCCCGGATGCTGGCCAAGCAGTACGGACACATGAAGATCGTGGCCTTGATGGACACTTACTCGCCCTCTCTGCCCAAGAGCCTCTATCGGAGCCCAGAAAAGTACGAAGATCTGAGCTCTTCTGACGAGTCCTGCCCTGCTCCTCAGAGACAGAGGCCTTGCCGGAAGAAGG…	0.623613	1982
ANKS4B	FALSE	FALSE	FALSE	TRUE	TGGAGAGTTTTGGCCTGGAGCATTGGGGTGATGCTGTGGCCCGCTGGCAGCACTCCAGGCGGCACCCCCTCTTTACCCAATGCCAGACCACTGGGAATGGATTCTAGGGCATCGGAAATGCCTACCTGAGAGAGAGACCCAAACTTTACTCTGGGAGGTAGGCTATGCCCATCCAAATAAATCTCCATGAGAAACTTGAGGAGACTTCATAACAAGAATCTGGCATTTCTCTTCAGTTATCTTATATGTACATATAATTGTTTTTGTGGTTGTTTTGTTTTGTTTTGTTTTGTTTTTTGGAGATGAAGGTCTCAGTCTCTTACCCAGGCTAGGGTGCAGTGGTATGATCATAGTTCACTGTATTCTCAACCTCCTGGGCTCAAATGATCTCCTCCCACC…	0.440331	3025
ANKS6	FALSE	FALSE	FALSE	TRUE	TCCTCCTTCCCGCAGCCACCAGCGTGAGCTCTCTGAATCCCGGGACCCCTTCACGTGGCCACAGCCCCAGCCCTGCCCCCGTCACACTGCTGTGCCTTAGTCATGTTGTTCCCTTTGCTCGGGATGCCCACTTCACGTCGACGGCATTCATTGGTAGTACTTCTTGCTGCAACAAACTTCAACACACAGAGACAGATTCCCATGTAACAGTCCAGTGGGGGTGCTTCTGCTTGGCAGGTTGGTTCACACAGTGATGCAGGGACTCAGCTCCTTTCATCCTGTGCTCTGCCCTCCCCGGGAGCCTCAGAGTTTGCTTCTGGCTGGCGGCAAGGGAAAGGGACGATGGAGAAGGCACGGCTGCTTCTTACCTGCCTTGCTCTTAACTGACACACATCACTC…	0.507778	4500
ANKZF1	FALSE	FALSE	FALSE	TRUE	GCTTGACTGGCATCGGTTTAACCTAAAGCAACGTCTCAAGGACAAGCCTCTCCTGTCTGCCCTGGACTTTGAAAAGCAGAGCTCCACAGGAGATCTTTCCAGCATCTCGGGATCAGAAGACTCAGACTCAGCCAGTGAGGAGGACTTGCAGACACTGGATCGGGAGAGGGCTACATTTGAGAAGTTGAGCCGACCCCCAGGCTTTTACCCTCATCGAGTTCTTTTCCAGAATGCCCAGGGCCAGTTTCTTTATGCCTACCGCTGTGTCCTAGGCCCTCATCAGGATCCCCCAGAAGAGGCAGAACTGCTGCTACAGAACCT	0.53271	321
ANLN	FALSE	FALSE	TRUE	FALSE	ACCGGGAAATTTCCATGCTATCTAGAGGTTTTTGATGTCATCTTAAGAAACACACTTAAGAGCATCAGATTTACTGATTGCATTTTATGCTTTAAGTACGAAAGGGTTTGTGCCAATATTCACTACGTATTATGCAGTATTTATATCTTTTGTATGTAAAACTTTAACTGATTTCTGTCATTCATCAATGAGTAGAAGTAAATACATTATAGTTGATTTTGCTAAATCTTAATTTAAAAGCCTCATTTTCCTAGAAATCTAATTATTCAGTTATTCATGACAATATTTTTTTAAAAGTAAGAAATTCTGAGTTGTCTTCTTGGAGCTGTAGGTCTTGAAGCAGCAACGTCTTTCAGGGGTTGGAGACAGAAACCCATTCTCCAATCTCAGTAGTTTTTT…	0.308144	1191
ANO1	TRUE	FALSE	FALSE	TRUE	CTATGCCAGCGGGGCTGGGCAGGCCAGCCGGGCATCCTGACCGATGGGCACCCTCTCCCAGGGCAGGCGGCTTCCCGCTCCCACCAGGGCCCGGTGGGTCCTGGGTTTTCTGCAAACATGGAGGACCACTTTCTGATAGGACATTTTCCTTTCTTCTTTCTGTTTTCTTTCCCTTGTTTTTGCACAAAGCCATTATGCAGGGAATATTTTTTAATCTGTAGTATTCAAGATGAATCAAAATGATGGCTGGTAATACGGCAATAAGGTAGCAAAGGCAGGTGCTTTGCAGAAAGAATGCTTGGAAACTTGAGTCTCCCTAGAGGTGAAAAGTGAGCAGAGGCCCGTAGAAACCCTCCTCTGAATCCTCCTAATTCCTTAAGATAGATGCAAAATGGTAAG…	0.422572	1524
ANO10	FALSE	FALSE	FALSE	TRUE	GTGCCCAGCGTGCCCAGCTGCCCTGTTGGCAGAGGCCTGTGTCTGTGCCACACCTGCCACGGTGGCAGGGGGGGTACCCGGGGCAGCATCGTGGCTCCTGAACCCAGACCCAATGCTTAGCCAAACGAAGTGGCTCCCATGTGGCAAGCACCCTTCTCAGTTTCGCAGTGGCTTGGCTCGGGATCCTTGGCAGTTCCCCCAGCCCCACCCTGTCTGCTCCTTCCCAGTTCCTTCCCGGGCCCCACACGCTGCTCCAGCTGCCAACTTTGCTGCAGAGCCACTGCCGCCCTTGAGCCTCTCACCATGAGTGAGCCACCAGCTCTCCACGTTCCCCTCATAGCAGTGTCACTCCCAACCCCACCATGGCCCAGGGACCCGTGGACAGGTTGGGGATGGGGT…	0.599244	1058
ANO3	FALSE	FALSE	FALSE	TRUE	TTGACACCTGTTACCCATTAGGGGTGATAACATTAATGGGAAGAAATGATGGCAACTTTGAATGCTAGGTGAAATCTAGGAGGAAGGCATACTTGGCAAACCACATGTATAATATGCTACTTGGAAATGTATCACAGCCATCTCTGGGATTTGAAATATCCAGACTTGTAGGGAAGAAAACAATGACTTGACGACCTTAAAAAGGGTTAGATTGACATTGCAGGAAGCCAGGATGTAATTCTCAGAACCAGTCTCAGGGAGATATATGCTTGGAGAACTCTGCCTTCCATCAACTGCAGTGTAATGGGAAAGAGGGTGGTGAGGTTTTGAAAGACAGATTTCCATGTAAATGTGCACAAGCCAGGCATGGCTTAAAATATCATGCAGTCTTCACTCACA…	0.346695	2844
ANO4	FALSE	FALSE	FALSE	TRUE	CCATAAAATAGTCCCTTTCCAGGCCAAGGACCTGAATTCTGTTTACTTCTTCTGGCTGTGCAAAAGCACACTCAAGTGAATGACTAAAAATGCAACCACAGTGCATGTTGCAGATACCGGCGGCCGCAGGAGGGGCAGCATCCAGTAGAGGACTGGCGTTGGAGTCACACTGCTGTGAAATCACGTTGCAGTCCAGCGCACAATTGCTATCTATCCATAGACCATTCTTGACCAAGCAAGCATGCACATTATGGGCAGTTACATTCTCAAGTTTTTAAAATCAAGGGGAACTTGTATACTGGGCCTGTTTTTCAGCCTGTTTGCTACCTTTTTTGCATTCTATCCCATGTGAATTTTACAGACACTGGGCTAAAAAGGGTATTCAGACACATGGACACA…	0.37707	785
ANO5	FALSE	FALSE	FALSE	TRUE	TCAGTATAGTGAGGAAGCAGCAGGTGATCTGCCTTACTTCACTTTATCCTCTGGTTTTAGGGCCAGACGCCAGAAGCCATGTGTCAATTTTACCCTTTCTTTTTTTTTTTTTTCTTTTTTTTTTTAAACTCAAAGTTTTTATACACTTTTATAGAGGCCAACTTTGTGATGTTGGAAATGTACTACTTCTCTGCTTCATTGACTGGGCCCTCTCCAGATGTTGTTTTCTGAGGTGCTGTAAATGACTGTTGAAAGTGCAGGTAGAATCAGAATACTGGGAAATTATGGAGTCTTGCAGTTTAGTAAGAAACACTGGCCTTGGGCTGTCCCATCACTTTCCAGTGCATCTATTTATTTTTGTGGTCTTCTCTTGGGTTATTTGATACCTCCTTCCCCATT…	0.328508	3592
ANO6	FALSE	FALSE	FALSE	TRUE	GAGCTTTATGTTCTGAGAAGCACTTTAAGGAATTTAGCTTTGTCAAAATATATTAGGAATCACTAATGAGAATGTGTAAGTTAAATCACTTTGGCAAATATGAGTCTCAACTATTGCCATTTCCTCATGTATTATTTTTCAGTTTCAGCTAGCGATGCAGAAACTGGAAAATGTAAAACTTAGATCATGAAGGGCATAAAACTTATCACCCGGAAAACCTCAATGTTACCTTTTTCTGATAAATTGGAATTTTACAGAAAAAGTCCCTCAGTGTGCTTAAAAACCACCCCTTCTAAAGTAGAATGGATTCTTTTTTTTCTGTTTGATTATTTTCATTTCTGTCTATTCTCAGGCGCATGATCTCCTTTATTTTTAAGCCATGTTTCATTTCTTCACTTG…	0.387829	3040
ANO7	FALSE	FALSE	FALSE	TRUE	CGCCTGGAAGGACATCTGGTGGTCCTTAGGGGAGTGGCCCCTCCTGAGCCCTGCGAGCAGCGTCCTTTTCCTCTTCCCTCAGGCAGCGGCTGTGTGAACCGCTGGCTGCTGTTGTGCCTCATCTCTGGGCACATTGCCTGCTTCCCCCCAGCGCCGGCTTCTCTCCTCAGAGCGCCTGTCACTCCATCCCCGGCAGGGAGGGACCGTCAGCTCACAAGGCCCTCTTTGTTTCCTGCTCCCAGACATAAGCCCAAGGGGCCCCTGCACCCAAGGGACCCTGTCCCTCGGTGGCCTCCCCAGGCCCCTGGACACGACAGTTCTCCTCAGGCAGGTGGGCTTTGTGGTCCTCGCCGCCCCTGGCCACATCGCCCTCTCCTCTTACACCTGGTGACCTTCGAA…	0.566639	1223
ANO8	FALSE	FALSE	FALSE	TRUE	GGTGGGCGAGGAGCGCTGCGCGTGCCAGGCTGTATTTTGTGGCTGAGCGCTGGGGGCCTCGCGTCGAGGCGCGTCCAAAGCAGCGGAGTTAGGAACCGGATTCGGCGTGTGTCTGGGCACGGTGCTCCGGCGGGGCGCCCAGGGAGGGTGAGTCCCCCGATCCCGGCGCCCCGCTTGCCCCCCACGCGCCTCTCTCCTTCCCCTTCCTGCCCCCAGATGCTGGCCACGCTGCTGATCACCCGCCAGTTCCTCCAGAACGTGCGCGAGGTCCTGCAGCCGCACCTGTACCGGCGCCTGGGCCGCGGCGAGCTGGGCCTGCGGGCCGTCTGGGAGCTGGCCCGAGCCCTGCTTGGCCTCCTGAGCCTCCGGCGCCCTGCGCCCCGCCGCCTCGAACCCCAG…	0.685918	2805
ANO9	FALSE	FALSE	FALSE	TRUE	GGCCAGAGCCCGTCCAGAGGCCACCAGGAGCTGAGACAGTGCCACCACCAGCACCTCCCACAAGCCCACCGCTGTGCGTGTTGAGGGGTGCTGTGAGAAGGCTGTGCC	0.666667	108
ANP32A	TRUE	FALSE	FALSE	TRUE	ATTTAAGTGGCAACAAAATTAAAGACCTCAGCACAATAGAGCCACTGAAAAAGTTAGAAAACCTCAAGAGCTTAGACCTTTTCAATTGCGAGGTAACCAACCTGAACGACTACCGAGAAAATGTGTTCAAGCTCCTCCCGCAACTCACATATCTCGACGGCTATGACCGGGACGACAAGGAGGCCCCTGACTCGGATGCTGAGGGCTACGTGGAGGGCCTGGATGATGAGGAGGAGGATGAGGATGAGGAGGAGTATGATGAAGATGCTCAGGTAGTGGAAGACGAGGAGGACGAGGATGAGGAGGAGGAAGGTGAAGAGGAGGACGTGAGTGGAGAGGAGGAGGAGGATGAAGAAGGTTATAACGATGGAGAGGTAGATGACGAGGAAGATGAAGAAG…	0.440998	1644
ANP32B	TRUE	FALSE	FALSE	TRUE	GACCCCAGATGACCTGCAGAAACAGAACTGTTCAGTATTGGTTGGACTGCTCATGGATTTTGTAGCTGTTTAAAAAAAAAAAAAAGGTAGCTGTGATACAAACCCCAGGACACCCACCCACCCAAAGAGCCAAAGAATAGTTCCTGTGACATTCCGCCTTCCTTCCATGTAGTCCCTCTTGGTAATCTACCACCAAGCTTGTGGACTTCACCCCAACAAAATTGTAAGCGTTGTTAGGTTTTTGTGTAAGATTCTTGCTGTAGCGTGGATAGCTGTGATTGGTGAGTCAACCGTCTGTGGCTACCAGTTACACTGAGATTGTAACAGCATTTTTACTTTCTGTACAACAAAAAAGCTTTGTAAATAAAATCTTAACATTTTGGGTCTGTTTTTTCATGC…	0.369141	512
ANP32D	FALSE	FALSE	FALSE	TRUE	GAAAAGATGTTCAAGCTCCTCCTGCAACTCACATATCTCAACGGCTGTGACCCGGATGACAAGGAGGCCCCTAACTCGGATGGTGAGGGCTTTGTGGAGTGCCTGGATGACAAGGAGGAGGATGAGGATGAGGAGGAGTATGATGAAGATGCTCAGGTAATGGAAGATGAGGAGGACGAGGATGAGGAGGAGGAACGTGAAGAGGAGGACGTGAGTGGAGACGAGGAGGAGAAGGATGAAGGTTATAACAATGGAGAGGTAGATGATGAGGAAGATGAAGAAGAGCTTGGTGAAGAAGAAAGGGGTCAGAAGCGAAAATAAGAAACTGAAGATGAGGGAGAAGACGATGCCTAAGTGGAATAATCTATTTTGAAAAATTCCTTTTGTGATTTTACTGTT…	0.469858	564
ANP32E	TRUE	FALSE	FALSE	TRUE	ATCATTCTAAGACCAGATTCTCTAATGTTTCTGGGTGTGCAATAGAGTGATCACATCTTTGTTTCTTCATGTACGATAGCTATCCCTACAGAAGATAATGTGTAACTTTTTATAGGAAAAGTGTGGTTTTACTATTTTTGCCTTATCATTCCAAATAAGAACTAGTCTGTTAATGATCATATTGTATGTAGAGAAAAATTTTCATTGACTCCCATTGTGGAATTCCCTAGCAATTTATTTAGACTTAATTTTTTAAATTCAAGCTTACTGTATTAGTCATTTTTAGCCCATAATTAAAACATGATCACTTTTACACAGGTGTAGTATGGTGCATTTCATTCCTTATTTATAAATTAACTGAAATTACAGTTTGCTATAATATAAAATGACAATAGTCTC…	0.314864	2274
ANPEP	FALSE	FALSE	FALSE	TRUE	ACCTGTGGGACCACCTGCAGGAGGCTGTGAACAACCGGTCCATCCAACTCCCCACCACCGTGCGGGACATCATGAACCGCTGGACCCTGCAGATGGGCTTCCCGGTCATCACGGTGGATACCAGCACGGGGACCCTTTCCCAGGAGCACTTCCTCCTTGACCCCGATTCCAATGTTACCCGCCCCTCAGAATTCAACTACGTGTGGATTGTGCCCATCACATCCATCAGAGATGGCAGACAGCAGCAGGACTACTGGCTGATAGATGTAAGAGCCCAGAACGATCTCTTCAGCACATCAGGCAATGAGTGGGTCCTGCTGAACCTCAATGTGACGGGCTATTACCGGGTGAACTACGACGAAGAGAACTGGAGGAAGATTCAGACTCAGCTGCAGAGAG…	0.55408	527
ANTXR1	FALSE	FALSE	FALSE	TRUE	AGCCCAAAGTTCCTGCTCTGGGCTCTCTCAGAAACTTCAGGAGATGTTAGAACAAGTCTTTCCAGTTAGAGAAGAGGAGTGGTGATAAAGCCCACTGACCTTCACACATTCTAAAAATTGGTTGGCAATGCCAGTATACCAACAATCATGATCAGCTGAAAGAAACAGATATTTTAAATTGCCAGAAAACAAATGATGAGGCAACTACAGTCAGATTTATAGCCAGCCATCTATCACCTCTAGAAGGTTCCAGAGACAGTGAAACTGCAAGATGCTCTCAACAGGATTATGTCTCATGGAGACCAGTAAGAAAATCATTTATCTGAAGGTGAAATGCAGAGTTGGATAAGAAATACATTGCTGGGTTTCTAAAATGCTGCCTTCCTGCCTCTACTCCAC…	0.402655	3842
ANTXR2	FALSE	FALSE	FALSE	TRUE	AAGGGAAGCAGGAAGACCAAGAAGGTACGAAGATGGCACATTTTCACATAGCTGATTTTCAACCAAATGAAAAAAATCAAGTGCATTTCAGAAGCTTTTGGAAGAGCAGCTTAATTCCTCTCAGTCGGGAAATGTTTTCTCTGCCTTCTGCTTTGCTTGCACCAAACATTTCTAAACACTTGTTCTGCCATCTACATGGGAGGTGATGAAACTCAGTGGTAACTCATGATTTATGACATTGAAAATAAAGAGGAACATTGACCTGCAGACTATGGTTTGTACAAGAAAGTTTGTTTGAATGTGTAGAAGAGGAAAAAGCAACAACAGCAACAACACGAAGATGATACCAAAACAAGGACCACAAAACAACTAGCCATGATGGGAGACAGGAGTTTTTTA…	0.360032	6280
ANXA1	FALSE	FALSE	FALSE	TRUE	ACATTCCCTTGATGGTCTCAAGCTATGATCAGAAGACTTTAATTATATATTTTCATCCTATAAGCTTAAATAGGAAAGTTTCTTCAACAGGATTACAGTGTAGCTACCTACATGCTGAAAAATATAGCCTTTAAATCATTTTTATATTATAACTCTGTATAATAGAGATAAGTCCATTTTTTAAAAATGTTTTCCCCAAACCATAAAACCCTATACAAGTTGTTCTAGTAACAATACATGAGAAAGATGTCTATGTAGCTGAAAATAAAATGACGTCACAAGACAA	0.297203	286
ANXA10	FALSE	FALSE	FALSE	TRUE	AATGAAGAGGACTTGGAGTACTGTGCACTCCTCTTTCTAGACACTTCCAAATAGAGATTTTCTCACAAATTTGTACTGTTCATGGCACTATTAACAAAACTATACAATCATATTTTCTCTTCTATCTTTGAAATTATTCTAAGCCAAAGAAAACTATGAATGAAAGTATATGATACTGAATTTGCCTACTATCCTGAATTTGCCTACTATCTAATCAGCAATTAAATAAATTGTGCATGATGGAATAATAGAAAAA	0.304688	256
ANXA11	FALSE	FALSE	FALSE	TRUE	ACAGTGACTGGTGGCTCACTTCTGCCCACCTGCCGGCAACACCAGTGCCAGGAAAAGGCCAAAAGAATGTCTGTTTCTAACAAATCCACAAATAGCCCCGAGATTCACCGTCCTAGAGCTTAGGCCTGTCTTCCACCCCTCCTGACCCGTATAGTGTGCCACAGGACCTGGGTCGGTCTAGAACTCTCTCAGGATGCCTTTTCTACCCCATCCCTCACAGCCTCTTGCTGCTAAAATAGATGTTTCATTTTTCTGACTCATGCAATCATTCCCCTTTGCCTGTGGCTAAGACTTGGCTTCATTTCGTCATGTAATTGTATATTTTTATTTGGAGGCATATTTTCTTTTCTTACAGTCATTGCCAGACAGAGGCATACAAGTCTGTTTGCTGCATACACA…	0.494359	4964
ANXA13	FALSE	TRUE	FALSE	TRUE	GCCAAGCCAGGGCAATAGGAACACAGGGTGGAACCGCCTTTGTCAAGAGCACATTCCAAATCAAACTTGCAAATGAGACTCCCGCACGAAAACCCTTAAGAGTCCCGGATTACTTTCTTGGCAGCTTAAGTGGCGCAGCCAGGCCAAGCTGTGTAAGTTAAGGGCAGTAACGTTAAGATGCGTGGGCAGGGCACCTTGAACTCTGGCTTAGCAAGCATCTAGGCTGCCTCTTCACTTTCTTTTAGCATGGTAACTGGATGTTTTCTAAACACTAATGAAATCAGCAGTTGATGAAAAAACTATGCATTTGTAATGGCACATTTAGAAGGATATGCATCACACAAGTAAGGTACAGGAAAGACAAAATTAAACAATTTATTAATTTTCCTTCTGTGTGTT…	0.419283	446
ANXA2	FALSE	FALSE	FALSE	TRUE	TAGGTACAAGAGTTACAGCCCTTATGACATGTTGGAAAGCATCAGGAAAGAGGTTAAAGGAGACCTGGAAAATGCTTTCCTGAACCTGGTTCAGTGCATTCAGAACAAGCCCCTGTATTTTGCTGATCGGCTGTATGACTCCATGAAGGGCAAGGGGACGCGAGATAAGGTCCTGATCAGAATCATGGTCTCCCGCAGTGAAGTGGACATGTTGAAAATTAGGTCTGAATTCAAGAGAAAGTACGGCAAGTCCCTGTACTATTATATCCAGCAAGACACTAAGGGCGACTACCAGAAAGCGCTGCTGTACCTGTGTGGTGGAGATGACTGAAGCCCGACACGGCCTGAGCGTCCAGAAATGGTGCTCACCATGCTTCCAGCTAACAGGTCTAGAAAACC…	0.469551	624
ANXA2R	FALSE	FALSE	FALSE	TRUE	ATAGCAGCAGAAGGCTTTTTGGATTCTCCTCCTTGAAAAGATTCTCAGTTACCAAACGTCTCCACCTAGAAAATAAAAATACATTAAGATGTGCTTTCATTGCTGGTTGTCAGTTTTTAAATTCTCTTTTTCCCTTATGTTTCTTTCTTGTTTCGCGTCGCTTATTACTTTCAGTTTCCTTGTATTTTAAATATTTGTATTTATTTCATTAAATATTTCATTCGTATCTGTTTTCACTTTGAGAAATCTATTTTACGATTGTAGAATTCTTAGAGTTTTTGGCAAATTTAAAATTTGTTTTTTTCCATTGTATTTTAAAATCTTATTCCTACTATTTTTCTAATTATTGCTTTTTAAATGTATTGTTTGTTTACATTTAATTTT	0.265625	384
ANXA3	FALSE	FALSE	FALSE	TRUE	ACCAAGAAGATAATCTCCAAAGGTCCACGATGGGCTTTCCCAACAGCTCCACCTTACTTCTTCTCATACTATTTAAGAGAACAAGCAAATATAAACAGCAACTTGTGTTCCTAACAGGAATTTTCATTGTTCTATAACAACAACAACAAAAGCGATTATTATTTTAGAGCATCTCATTTATAATGTAGCAGCTCATAAATGAAATTGAAAATGGTATTAAAGATCTGCAACTACTATCCAACTTATATTTCTGCTTTCAAAGTTAAGAATCTTTATAGTTCTACTCCATTAAATATAAAGCAAGAT	0.316993	306
ANXA4	FALSE	FALSE	FALSE	TRUE	AATAAAAATCCCAGAAGGACAGGAGGATTCTCAACACTTTGAATTTTTTTAACTTCATTTTTCTACACTGCTATTATCATTATCTCAGAATGCTTATTTCCAATTAAAACGCCTACAGCTGCCTCCTAGAATATAGACTGTCTGTATTATTATTCACCTATAATTAGTCATTATGATGCTTTAAAGCTGTACTTGCATTTCAAAGCTTATAAGATATAAATGGAGATTTTAAAGTAGAAATAAATATGTATTCCATGTTTTTAAAAGATTACTTTCTACTTTGTGTTTCACAGACATTGAATATATTAAATTATTCCATATTTTCTTTTCAGTGAAAAATTTTTTAAATGGAAGACTGTTCTAAAATCACTTTTTTCCCTAATCCAATTTTTAGAGTGG…	0.343849	1585
ANXA5	FALSE	FALSE	FALSE	TRUE	TTACAGTTTGATTAAAAAGCCTGAAGTTGGACTGGGCTGAATCTAGCTAACAGAGACCCTGATGCTGGAATTGATGAAGCTCAAGTTGAACAAGATGCTCAGGCTTTATTTCAGGCTGGAGAACTTAAATGGGGGACAGATGAAGAAAAGTTTATCACCATCTTTGGAACACGAAGTGTGTCTCATTTGAGAAAGGTGTTTGACAAGTACATGACTATATCAGGATTTCAAATTGAGGAAACCATTGACCGCGAGACTTCTGGCAATTTAGAGCAACTACTCCTTGCTGTTGTGAAATCTATTCGAAGTATACCTGCCTACCTTGCAGAGACCCTCTATTATGCTATGAAGGGAGCTGGGACAGATGATCATACCCTCATCAGAGTCATGGTTTCCAGG…	0.396923	975
ANXA6	FALSE	FALSE	FALSE	TRUE	GGCCACAGCTTTGGCGGGCACTTCTGCCAAGAAATGGTTATCAGCACCAGCCGCCATGGCCAAGCCTGATTGTTCCAGCTCCAGAGACTAAGGAAGGGGCAGGGGTGGGGGGAGGGGTTGGGTTGGGCTCTTATCTTCAGTGGAGCTTAGGAAACGCTCCCACTCCCACGGGCCATCGAGGGCCCAGCACGGCTGAGCGGCTGAAAAACCGTAGCCATAGATCCTGTCCACCTCCACTCCCCTCTGACCCTCAGGCTTTCCCAGCTTCCTCCCCTTGCTACAGCCTCTGCCCTGGTTTGGGCTATGTCAGATCCAAAAACATCCTGAACCTCTGTCTGTAAAA	0.580175	343
ANXA7	FALSE	FALSE	FALSE	TRUE	GAGGGATTTTTTTTTTTTTAATGAAAAAAAATTTCTATTCATAGCTTATCCTTCAGAGCAATGACCTGCATGCAGCAATATCAAACATCAGCTAACCGAAAGAGCTTTCTGTCAAGGACCGTATCAGGGTAATGTGCTTGGTTTGCACATGTTGTTATTGCCTTAATTCTAATTTTATTTTGTTCTCTACATACAATCAATGTAAAGCCATATCACAATGATACAGTAATATTGCAATGTTTGTAAACCTTCATTCTTACTAGTTTCATTCTAATCAAGATGTCAAATTGAATAAAAATCACAGCAATCTCTGATTCTGTGTAATAATATTGAATAATTTTTTAGAAGGTTACTGAAAGCTCTGCCTTCCGGAATCCCTCTAAGTCTGCTTGATAGAGT…	0.31992	994
ANXA8	FALSE	FALSE	FALSE	TRUE	CCAGGTCTTCACTTGTGAAACAGGAGTCGGCCACCTCAGCCCTGCGCCTGGCCTGGTGGAACATGGGTCACCGCCCCAACCTGGGGCAGCCGCCCCATCCCAACGCAGTTGCTGCCGCTCTCCATGCCTCCCTGTGCCCAGCTAACCGGGGGACTTGTCCCCTGGGAAAACCTGGGTACCCAGGCTGCCTTTGGTTTCAGCCCCTACTCCTCTTCCCGGGCTGCCTTTGCTCCCCGGACGGCCCCTTTCCCCGGGCTGTGTTCACATCGGCTGGGAAGGGTCCCTTGCAGACAGATCTTGGACGAGGTCGCGTCCCCCCTCGTGACCAGCAAACTCCTAAAAGCCGCCCTTGCCCCAGAGCCCCTGTAGCCTCCAACCGGCAGTCAGGAGGCAGCGCCG…	0.473504	1755
ANXA8L1	FALSE	FALSE	FALSE	TRUE	GGCACAGAAGAACAAGAGCAAAGACCATGAAGCCAGAGTCTCCAGGACTCCTCACTCAACCTCGGCCATGGACGCAGGTTGGGTGTGAGGGGGGTCCCAGCCTTTCGGTCTTCTATTTCCCTATTTCCAGTGCTTTCCAGCCGGGTTTCTGACCCAGAGGGTGGAACCGGCCTGGACTCCTCTTCCCAACTTCCTCCAGGTCATTTCCCAGTGTGAGCACAATGCCAACCTTAGTGTTTCTCCAGCCAGACAGATGCCTCAGCATGAAGGGCTTGGGGACTTGTGGATCATTCCTTCCTCCCTGCAGGAGCTTCCCAAGCTGGTCACAGAGTCTCCTGGGCACAGGTTATACAGACCCCAGCCCCATTCCCATCTACTGAAACAGGGTCTCCACAAGAG…	0.509368	854
ANXA9	FALSE	FALSE	FALSE	TRUE	GACTTCCCTGCCCCACCCCACATGACATCCGAGGATCTGAGATTTCCGTGTTTGGCTGAACCTGGGAGACCAGCTGGGCCTCCAAGTAGGATAACCCCTCACTGAGCACCACATTCTCTAGCTTCTTGTTGAGGCTGGAACTGTTTCTTTAAAATCCCTTAATTTTCCCATCTCAAAATTATATCTGTACCTGGGTCATCCAGCTCCTTCTTGGGTGTGGGGAAATGAGTTTTCTTTGATAGTTTCTGCCTCACTCATCCCTCCTGTACCCTGGCCAGAACATCTCACTGATACTCGAATTCTTTTGGCAAA	0.477564	312
AOAH	FALSE	FALSE	FALSE	TRUE	GCCTCTCAGGAGCATGCACCCCTGGGGAGCACAGGGAGGCAGAGGCTTGGGTAAACTCATTCCACAAACCCTATGGGGGCTGCCACGTCACAGGCCCAAAGGACTCTTCTTCAGCAGCATCTTTGCAAAATGTCTTTCTCTCAATGAAGAGCATATCTGGACGACTGTGCAATGCTGTGTGCTCCCGGGATCAGTAACCCTTCCGCTGTTCCTGAAATAACCTTTCATAAAGTGCTTTGGGTGCCATTCCAAACAAGAGAGTATCTGTGCCCTTTACAGCTAATTGTTCTAAAAGGAGTTTCT	0.49505	303
AOC2	FALSE	FALSE	FALSE	TRUE	TCCTGAGGGTGTGGCGGGCGGCGTGGTTAGGCACATGTACTTTTCCCTGTTTCTACTTTCTATTCTCCGTGTTTTTATCACACCTGCTCCCCAGATTCCCACCCCCTCAATGTTCCTCTCACACGAAACCCCCATCAGTCCCTTTGGTTAATTCTTACTTCCTGTTCATCTCTAAAGTGTTAAATTATAAAAATGATTTTTAAATATTCAAAGAAAAATATCACAAATCCTACTACTCAGAAATAGGTGGTCACATTACATCAGACATCTCTTTATGCATGTGCATTCAAAAGGAAGAGTAGATAGAATTTTGTAAAACAGATGTTGTATGTAATTTATAATAAAAAGTATTAGAGGAA	0.370474	359
AOC3	FALSE	FALSE	FALSE	TRUE	CAGCTGGTTTTCTGCATATCCCACATGCAGAGGACATTCCTAACACAGTGACTGTGGGGAACGGCGTGGGCTTCTTCCTCCGACCCTATAACTTCTTTGACGAAGACCCCTCCTTCTACTCTGCCGACTCCATCTACTTCCGAGGGGACCAGGATGCTGGGGCCTGCGAGGTCAACCCCCTAGCTTGCCTGCCCCAGGCTGCTGCCTGTGCCCCCGACCTCCCTGCCTTCTCCCACGGGGGCTTCTCTCACAACTAGGCGGTCCTGGGATGGGGCATGTGGCCAAGGGCTCCAGGGCCAGGGTGTGAGGGATGGGGAGCAGCTGGGCACTGGGCCGGCAGCCTGGTTCCCTCTTTCCTGTGCCAGGACTCTCTTTCTTCCACTACCCTCCCTCGCATCC…	0.526975	1835
AOX1	FALSE	FALSE	FALSE	TRUE	ATCAAATGCAAACTTCTGGAGAAAACAGAGTGCCTCTTCCCAGATGGCAATCTGTCCTATCTCTGTGCTGGAAGATGCTAGATCTGAAAGACAGAGTTTCCACAGTTCAGAAATCATCCCACAGTGTTGCTTTTCTATGGAGCTGATTTAAAGTATTCCATTTAGATTTGATAGATATGCTTAAGCAATCTATAAATCATTTTCAATGTTATAAACACTAATTGGTTTCCTCTAGGGTGATATCCGTCATTACTCTGTCTCTTCAATCCATCCAGCTAAATGGAATAGGTGATGACTTGCATGTGACTCCTACTTGGCTTCTATCCACCAACAGAAATTATACCATATAGTGAAAGGCAATTTTCTAAATAATTTCATTACTAATATGAACTGTGAAGT…	0.327206	816
AP1AR	FALSE	FALSE	FALSE	TRUE	GGTAAAATTGTGTGACCTTGTTTATCAGTTATGACCAAATGTTAAAAACCAACTAGAATGTATAAGTGATTGTGCTTAGCCTTTTTGTAAGGGAGATGTGTAAGAAACCATGTTGTAAATGCTTATTTTATTACAAAGGAGTAGGGATGATAGGATCTGAATTGATACAGAATTAAGTGCAATTTCATCATCTGCCTTCTGCTTTTCAAGACCAATTTAATGGTCCTGTCATGTTACTGATTAAATTTACTTTGTCTTGTCTTTATAGCATTTCTGTTTACTATGGTAGATTTCCACTTTCAATTTTTAAAATTAATTTTACTTTGAATGATTTATGAAGCCTATTTCATTGTCTAACTATGAAAATATTAAGACTTTTTTGTTAATTCTCAGCCGATG…	0.288767	1638
AP1G1	TRUE	FALSE	FALSE	TRUE	GGGTTTGGCACCATTCTCATTCTTTATCCCACTCAATCAAAGGAACTCTGGGAAGGAGGTTGTGATTGCTGGCAAGTCCCCCCCAACTGTACCACGGGCATGAGGAGCTGAAGAGAACTGCTGAGGAGGATTTTCCTAAAGTTACTGCTGACCTTGAAGCATTGTTAAAGACTAATGTCCTCTCCTCCACTGTTGAGGCTGGCTGCTTCTGGAGGCTACTTTGCACTCTTCCTCTTCTCCTTTTTCCGCACTTCTCCACCCCTCCCACATTTACAGCCAGAATCAACATTCCCTGGGCCCCTGAGGAAATAAGCAGCTGGTCTGGAGGAGAGGACTGCAATCCATGGCGAAAAAACACTCACTTTGTCTCTGCAGCAAAGAGTTGCCCCTTCTTTCTAC…	0.399704	4058
AP1G2	FALSE	FALSE	FALSE	TRUE	CCTGAGCCAGGGGATTCAGCCAGTACAAGGCCTGGCCTTGTGCACTTTGAGCACCATGGGCTCTGCTGAGATGTGCCGAGACCTGGCCCCAGAGGTGGAGAAACTGCTCCTGCAGCCCAGTCCCTACGTGCGCAAGAAGGCTATTCTGACTGCAGTGCACATGATCCGGAAGGTCCCTGAACTCTCCAGTGTCTTCCTCCCACCCTGTGCCCAACTGCTTCATGAGCGTCACCATGGCATCCTGCTGGGCACCATCACGCTGATCACGGAGCTCTGCGAACGAAGCCCTGCAGCCCTCAGGCACTTCCGAAAGGTGGTACCCCAGCTGGTACACATCCTCCGGACTCTGGTGACAATGGGATACTCCACAGAACACAGCATATCTGGAGTCAGCGACCC…	0.588115	488
AP1M1	FALSE	TRUE	FALSE	TRUE	GGGGCTGTCGCAGCCAACACCCCGGCCTCGGGGCTCCTGGTGGCAGCACCAGGGGACACACCTGCCAAACCCACCAGATGGAGGGGCCCTCCCTGGTCTCTGGCCACCCTCCCAGCCTCTGCCCAGGGACCCCTGCCTTCCCCAGGCCATCTGCTCTGCCGTCGACACTCGTCTCAGAAGCCCCTTTCCCAGAAGAGGCTGGTCTTCAAGAAGTCTCGTTTCTTTGCCCCTGAAGTCAGTTTCAGGGGAAGGATGTGAAATTTTTCCGTGTAGAGGTTACAGCCTTTTATGCTGTTGAGCTCCCAGGTACCAAAAAGCTTGGCCAACGCTTGCCAGCCAGCCAGCTGCAGGTGGCATCTGCCACGAAGGAAGCGCCAGCCTCGCCAGGCCAGCAGGGGC…	0.473501	11472
AP1M2	FALSE	FALSE	FALSE	TRUE	AAGGGAGAAGAGATGGGGGCTTGAACACGGGGCTTCCTTACAGCCCCGGATGCAGATTTTAGAGGGAGGGCAGGTGCGGGCTGTGTGTGTCTGTGTGAGGGCAGGTCCTGGACTTGGCAGTTTCTTGCTCCCAGCACCCGCCCCTTCCTCACCTCTTCCTTATTCCATAGGCTGGGAGAGAAACTCTCTCTGCTTCCCTCGCCCTTGGAGCTTTCCCCATCCCCCTGATTTTATATGAAGAAATAGAAGAGGGGCTTGAAGTCCTCCTCGCGAGTGCCTTCTTGCAATTACCTGCCTTAGCGGGTGTTGCGGGTCCCTCCTTCACAGCCGCTGAGCCCAGAGGTCCCGCTGGCCCCTCCTCTGAATTTTAGGATGTCATTAAAAAGATGAATCTA	0.551899	395
AP1S1	TRUE	FALSE	FALSE	TRUE	CCCCTGCTGGGCCGGGGTGTGGCGATGGGGTCCTGGCAGCGTGGCGGGAACGGCTGCTTCTCCTCTGCCCAGGGCCCTGTTCTTGGTGGGACTCGGCTGCCCCTCCTCTGCTGCCTCACCTTTCGGAGTGAGCTGTGGGCTCAGGCCCTTCAAACATTCCCTCCCTCCACCCCCTACCTCCACTTTCCCCTTTTCCCACTGAAGGTTTTAGAAGCTAGGAGGCAGGAAAATGTGACCCAGATGGGGGTGCTATTTGGCTTTTATTCCCTGCCTTTGCAGAACTGATGTCACCCCAGATGTCCTTCCCTCCCTAATAACTGTAAATATATAAATATGTCAGGTTAAAGGGAAAAGGTGTTCAGGGCACTTCTTGTCCTCTCTGTCCCATAACCTACCTCC…	0.558368	711
AP1S2	FALSE	FALSE	FALSE	TRUE	AATACGTGCTGGAGTACTGACATGCATCAAAATGTAGTAGGATATATAAATTCAGTTTGTAATGACAATTTTGTCAAGTTTGTTATTTATATTTTAGCATTACCTGAAAAGTCTAATTACATTAAATCCCAAGGGATAGTCCCAATTACTTCATTAAACTGGTATTTTCATAGGGAATTTTGCTTGGATAATGATCCATTATTGGGGCTTATAATTTATTTTTTACACAGAATATGGAAATAGCTTCAGAGGTTCATTGACAATAAAGCATTCATTAAATACTGTGAATCACTAATGCCATTGATACAGAAGAATTTCCCTATGAAAATGAGAGCTTCTGTGAGAAAATGAAGTAGTTGGGAGTTTAATTTCTTATTAATATGATTTTAACTTGCTGCT…	0.300484	2892
AP1S3	FALSE	TRUE	FALSE	TRUE	AGAAGTTTCCTTGAGGTCTGTGAGCTGGATATTATCTTTAATTTTGAAAAGGCTTATTTCATCCTGGACGAGTTTATAATAGGTGGGGAAATTCAGGAAACATCCAAGAAAATTGCTGTCAAAGCCATTGAAGACTCTGATATGTTACAGGAGACAATGGAAGAATACATGAACAAGCCTACATTTTAACTGGAAATCTACTTGAAGACTCCAGCACTACATGTTATGAAGCTGTAAATAAGCAACGCCTCCCATCCGGTTTTTTGATGGAGCCTCAGGCACCATGCCAAAAATAATTTAAAGGGATTCTTTGTTAACTAACAAAGTTAAAGTTGTTTAACATATTTATAATTACTATGTGTCTGTATTATTAAAAAAAATTATGTGTCTGTGTTATAC…	0.371279	1915
AP2A1	FALSE	FALSE	FALSE	TRUE	CTTCAAGACGTGCGTCTCTCTGGCTGTGTCGCGCCTGAGCCGGATCGTCTCCTCTGCCTCCACCGACCTCCAGGACTACACCTACTACTTCGTCCCAGCACCCTGGCTCTCGGTGAAGCTCCTGCGGCTGCTGCAGTGCTACCCGCCTCCAGAGGATGCGGCTGTGAAGGGGCGGCTGGTGGAATGTCTGGAGACTGTGCTCAACAAGGCCCAGGAGCCCCCCAAATCCAAGAAGGTGCAGCATTCCAACGCCAAGAACGCCATCCTCTTCGAGACCATCAGCCTCATCATCCACTATGACAGTGAGCCCAACCTCCTGGTTCGGGCCTGCAACCAGCTGGGCCAGTTCCTGCAGCACCGGGAGACCAACCTGCGCTACCTGGCCCTGGAGAGCATGTG…	0.63587	2024
AP2A2	FALSE	FALSE	FALSE	TRUE	TCCTGAGGATGGAAGACCAGGCTCGTGTGTCTTGTGTTGTCTTCGTCTGTGCCGTTTGTCTTCGTGGCCATCCTGCAGATGAGCACCGTGTCCAGTGCCACAGCACAAGGCGCCTCCCCGCCCCGCCGCCCCACACCTCTCCCCTTTGGGCTGGACGGGAACACACGTGTGTGGCTCAGGAGGAAAAGCTCAGCCTGGACTGTGGCAGCCACGGCAGAAGGTGGATCTTGGGATCAATTTTTATAAAAATCGAGACAGTTCTGTGGTTAAATCTACAAATTAAAGGGAAATTAGAAGTTGGCGTGAACGTGGCGTTTGTGGGAGTGTCACTGAGATGGCCCGTGCTGCCGCCCACCCCGCCTCGGAGCCTCTGGGAGCAGCAGTGCCACTGTGCATGGC…	0.611111	1620
AP2B1	FALSE	FALSE	FALSE	TRUE	AGCACATTTGGTTTTTAAATTGCTGTCCTGTGACCATCTATCTAAGGAGTTGGCAAACGTTTTTGTAAAGGACAAAATATTCTCTCTTTCCAGACGTAGTGAACTGTATGCAGACTGACAATCTGGAACTAAAGAAGCTTGTGTATCTCTACTTGATGAACTACGCCAAGAGTCAGCCAGACATGGCCATCATGGCTGTAAACAGCTTTGTGAAGGACTGTGAAGATCCTAATCCTTTGATTCGAGCCTTGGCAGTCAGAACCATGGGGTGCATCCGGGTAGACAAAATTACAGAATATCTCTGTGAGCCGCTCCGCAAGTGCTTGAAGGATGAGGATCCCTATGTTCGGAAAACAGCAGCAGTCTGCGTGGCAAAACTCCATGATATCAATGCCCAAA…	0.458917	3140
AP2M1	TRUE	FALSE	FALSE	TRUE	CTGCCACTAGGCAGCTAGCCCACCTCCCCAGCCACCCTCCTCCACAGGTCCAGGTGCCGCTCCCTCCCCCACCACACATCAGTGTCTCCTCCCTCCTGCTTTGCTGCCTTCCCTTTGCACCAGCCCGAGTCTAGGTCTGGGCCAAGCACATTACAAGTGGGACCGGTGGAGCAGCCCCTGGGCTCCCTGGGCAGGGGAGTTCTGAGGCTCCTGCTCTCCCATCCACCTGTCTGTCCTGGCCTAATGCCAGGCTCTGAGTTCTGTGACCAAAGCCAGGTGGGTTCCCTTTCCTTCCCACCCCTGTGGCCACAGCTCTGGAGTGGGAGGGTTGGTTGCCCCTCACCTCAGAGCTCCCCCAAAGGCCAGTAATGGATCCCCGGCCTCAGTCCCTACTCTGCT…	0.597895	475
AP2S1	FALSE	FALSE	TRUE	FALSE	GGGCAGGCGAGCCCCACCCCGGCCCCGGCCCCTCCTGGACTCGCCTGCTCGCTTCCCCTTCCCAGGCCCGTGGCCAACCCAGCAGTCCTTCCCTCAGCTGCCTAGGAGGAAGGGACCCAGCTGGGTCTGGGCCACAAGGGAGGAGACTGCACCCCACTGCCTCTGGGCCCTGGCTGTGGGCAGAGGCCACCGTGTGTGTCCCGAGTAACCGTGCCGTTGTCGTGTGATGCCATAAGCGTCTGTGCGTGGAGTCCCCAATAAACCTGTGGTCCTGCCTGGCCTTGCCGTCTTTGAGCCCTTGCCTGTCTCCC	0.672026	311
AP3B1	TRUE	FALSE	FALSE	TRUE	CCTGCTTACATCTGGACTTTAGAATCTGGCACACAACAAAAGTGCCTGGCATCCACTACTGCTGCCTTTCATTTATAATAATAGCCCTTCCATCTGGCAGTGGGGGTAGAATACACTCTTGACATTCTTGTCTCCTGCTTTAGAATGCTAGTGTGTATCTATCATGTATGCAATACTTTCCCCCTTTTTGCTTTGCTAACCAAAGAGCATATATTTTACTGTCAGTTGTCTCAACTCTTGAATCCATGTGGCGTTTTCTCTGTCCTGCTGCTTCTTTTGGCCTCCTCGTTTTCCTTCTCTTTTTCGACAATGGTAGACATGAATGAGATATTTAAAGTTCATTGGAAATCTTCTTCCCTACAGCAGTAAGCAAAAATTAGCAAAGAGATAGTCTAAATG…	0.328145	2377
AP3B2	FALSE	FALSE	FALSE	TRUE	CAATGGAGAACCCCTCAACCCTCACCCCCCTTTGTGTAAAGGTGTGAATTGTGGTCCACAGCCAGGTAGATTTCAACCTTTAGCAGTGGCCTGAATCCCCCACACCATTCTCACCTTTTGTTTCATTTTGCCCAAGGCCTCTAGTTGGATTTACATATGTTAGGTGCATGTATAAGTCTCCCCCCTAAGGGCTTTTCTGGTTAGTCTAAGACATCTTGAGGGTAAAGACAGCCATTTCAAGGCCATTCTCTCCATATTGGATTTTTCAGCTCTGATTACAACCATTAACTCCTCTATTTTTGCATACCTTTATTTATTTATTTATTTATGAGACAGGTTCTCACTGTGTTGCCCAGGCTGGAGTGCAGTGGTGCAATCATGGCTCACTGGAGCCTCGAC…	0.405147	3342
AP3D1	FALSE	TRUE	FALSE	TRUE	GAGCTGCCTGCGAGCCCCGCACCACCCCGCGGAGCACGTACCCAGGGACCGCAGCCCTGACGTGTCTCGCCTCTCCTCAGTCGTGTGTACTGTACCCAAGCCTGAGTGTTAATTTAACTCTATGTTGTCCGCCGTGTAGACATCCGAGGTCATTTGTTGCGTTGAATTATCTGACCATCCTTTTTTACTGTGACTCTTCCCATTCTCTTTGGCAAGAAGTCCCCTTCTCGCCCCCAAACCAGCAAGGGACTCCCCCACCTGGGTCTGTGCCCTGCCCCGCGCTGGGGGCCGAGTCCTTGAATGTGGCTTCAGGGGCTCCTGTCCTGGGCCAGGGCCTGATGGGCACCACGTGAGGGGCACTTGGTGGACAGGGCGGGGCTGACGTGGCCTCCTCTGGGG…	0.574684	1185
AP3M1	TRUE	FALSE	FALSE	TRUE	GAAGAGGCCAAAATTCCTCAGGACCAGTTTGTTTTCCAAGTGTCATTACGATGTATCACTATTAGGTACCAAGTGAGTGGGAATACATATTCTAGTTAAAGCATTTGTGTCTAGCTACACACCGCTAACAAAGTTACTTAGTTATCAATGTAGGATTCTTAAGGAGCTTTAAGCTAAGGAAACCTTTTAGTGACTTAGCTTATTTTGTATCTTTTCACTTAGGAAGATTTTGGAGGTGATTTTTTTCCATAGGAGGATACCATCTGGCGGCTGCACATTGTAACAGTAAAGGCAGAAAGCTGTAGTGATAACCTCTCTCCTAAAAGAGTTAACTGGTCTCATCCAGCAGAAGCTATCTTAAATCTGTGATGTGTCAGGTGCAGCCAAATATCACACCTT…	0.401969	3555
AP3M2	FALSE	FALSE	FALSE	TRUE	AGGGAGCATTTGCTGAGGGAATAGTCTTGCACATTTTTTCATTTCTTACTTGTCTAAAAGTAAAAAAAAATATCAGCCTGTCTCCTAGGTCAGTCCCCTCCTGGACCCACCCGCTCCCTTTTTTCCTTAGCCTTCAGTGCCATGGAACTAATCAAGGGAGGAAAAGGTCACCAGGGAGAACTGGACAGAACTGAAACACAGCAACACCAGTTCTCAAGGACAAGGTGTGTGATGGGGGTAGGAAGCTTGGTGCTTATGTAACCATTTTAAACGTGGTTTCTATAGGAAAGACCAACATTTGTTTAGCTTGCTTGGCTTTAATTATCTAAAGCCAATGAAAGACTTCTTTGTTGATTTTTTAAGATAGAAAGATTAAAAAGAAAGAAAGATGGGAAGAAA…	0.426484	2122
AP3S1	FALSE	FALSE	FALSE	TRUE	AAATGTAAAAAGGCCACTCCCAGGTAAAATCCAGGGGGAAGAGTCATCTAAGTTTACCATGCAGTTGTTTACCAAAAATAGAGGAGGAGAGTCTTAACTTTTGCTCTTGGATTTAAGTCAAGGTACTGTATAGAAGTTGTGTAAAATCAGTATGAAAGTTCAATGTTGCTGTTCTTGCTCAGTGATTTTAAAGAAATTGAGTAGTTCCTATGTGATTTTTTTTTTTCTTTTCTAAACTGCATTCCTGTGCCCACCTACGGCATGCCTCTATGTATTGGCTACTACAGTGTTTTAAAAAGTGTTTCAGATATTTCTCTAATTATGTACAACCTAAAATGTTGGTGTTTTGTATGGATCACAAGTGCAGCATTCCTTAATTCCTTCTGCTATATGTCACAC…	0.335025	591
AP3S2	FALSE	TRUE	FALSE	TRUE	GGATCAAGTATTGGCCTGAAATAGAGTCCTTAAGACAAGCAAAGACAAGCAAGGCAAGCACGTCTGGAAACAGAACCCATTTTGAGCCTTAGAAGAGTCAAGCCTCAGGACCTGGAAACTTTGTGTCTGGGGAAGACTGTTTGGCATGGAATAGGGAAGGGATTCCTATTGACACTGCTCGGGTGCACCCAGTTCTCACATGTGCAGTCATGCCGTTCTCTGATGCATACGGCCACTGCAGATGTGAGGGGCCCTGCCTTCCTCAGTAGGGAGTCAACATGCCCAAGTCATTTGCACCTTTACCTCTCACATGGATGCTCCCAAGGGTTAGGGACTGCATTGAGCAGGCCCACCTGCTTCCCAGAACCTCCTCACTAGGGCTGAGCACCTTCTCTGAGT…	0.5	4916
AP4B1	FALSE	FALSE	FALSE	TRUE	CAGAGTCTTGTTGCTTGTCTAGAGTAAGATGAATAACTATTACACTTTCTTAGTCTTTCCTATTAGAGCTGCCAGTAAGTCCAGATAATATCAGATACAAAGGAGAGTGGAAAATCTAGAAATCAGGATTCTTAAGTTTTTGGCCAAAGAACATTGATTCATTCCTTTCATTCCTATTGGCAATTGACCCCATTTTTCAGTGATGATGTTGTAGAGGTTAATGTTGGTAAGGAGATGCGTTGAGGATGGGATTTGGATTATTTCCTAATCAATTTTAGGAATTGTGTTAGTAATTAAAGATGGCTGATGTGTGGAAA	0.353312	317
AP4E1	FALSE	FALSE	FALSE	TRUE	CAGAAGCCCTGCTAAATTTTACTCCATCAAGATCAATGGTTTACATAGATAAACTTATTTACCAAAGTAAAAAGAACTCATGGTACTTCTAATGAAAATGGGGATTATTACAAGTGTGGTTTATATGTTTTCTTTGTGATTCCTGGTCAAGAAAGATCCCCAAAACTGTATCCCTAACCTTTAACTCAGGATTGTACAGTATGTTTAGGTCCCTCAAAAAGTGACCTAAGCTAATGTTATAAACTGCTAATGATTTATATATCACTTAGTGTGTAGAGGGACTGAAAATATTTATTTTGTTATAAATAATTTTATAGCACGTTTACTCTAGTGCTAGCTAATTTGTAATAAAGCCAAGTCTCAGTTTTCTGCATTAAATGGAAGGGAGACATGAAATTG…	0.372452	3238
AP4M1	FALSE	FALSE	FALSE	TRUE	CGGAAGAGTTTTGTGTGGGGAAGTCAGAGCTGAGAGGTTATGGGCCAGGAATCCGGGTCGATGAAGTCTCGTTTCACAGCTCTGTGAATCTGGACGAATTTGAGTCTCATCGAATCCTCCGCTTGCAACCACCTCAGGGCGAGCTGACTGTGATGCGGTACCAACTCTCCGATGACCTCCCCTCACCGCTCCCCTTCCGGCTCTTCCCCTCTGTGCAGTGGGACCGAGGCTCAGGCCGGCTCCAGGTTTATCTAAAGTTGCGATGTGACCTGCTCTCAAAGAGCCAAGCCCTCAATGTCAGGCTGCACCTCCCCCTGCCTCGAGGGGTGGTCAGCCTGTCTCAGGAGCTGAGCAGCCCAGAGCAGAAGGCTGAGCTGGCAGAGGGAGCCCTTCGCTGGG…	0.593706	2828
AP4S1	FALSE	FALSE	FALSE	TRUE	AAGGAAGTCTCTTCGAGACAATATGGATTTATCAGAAATGCGAGTACCGTGGAATACATCTCAACATGTTAACCCAGAAGAATCTGGAAGACCACAATTACAAAATGGGGTATCCTTCCAAAGACATTATAAATAGGCATTTTCCACAGTTCCTAAAAAGAAAACACAACTGTACTTTAAAATATGTACAAAGAAAAAAATTTCTTTAAACTGAGAGAGAAGTTTTATTTTCTAATTGTAAACATATCTGTCGCACTTTAAATTCTGTTGAGCACCTAAGGAACCCTTCTTGGTCTATGCTTCTTTTGCAAATTGAATTCAGGAATAGCAGGATGGTAGTGGGAAGAAAGTATGGCAGTTTTCCGTCAGCCAATAAAGTTTTAAAATTTAAACACAAGG…	0.448316	3415
AP5M1	FALSE	FALSE	FALSE	TRUE	TAGTCTCATGTTTAAATGGGATTATATAATGATAACAGTTTAAAGAAAATCATAATCTTATATTTTTAATGTGGATGCATATAACCTGTGAGTGAAAAATCACTGAATGATTTAATTGTAAAAGTAGTCTTATGTGGTGTTTGTAGTCTGATAGAGCTTGAAAGGACATTTTAAAAGCTAATGTCTCCAATTTTGTTAACCTTCGATTTTATGCCAGTATAATTCAGAACATAGAAAAGTAATGATTCACTTGGGCTCATTTTAGACTGGTCCTGGGTCACCCTGCCACACTTGTTTCCTAGTGTTTCTGTGGCAGACATTGCTAATCAATTACAGCCCTTTTCTGTACTGAGCCTTGGATAAAGGGTCAGGCTCCTTTTTAGTTCAGAGATTCAGGCA…	0.335362	9858
AP5S1	FALSE	TRUE	FALSE	TRUE	TTCCTCGTTGGGATGGTGCTTCTGAGGGCAGGCAGAGGGTAGACACACAGCCAGATGAAGCTTGGCATCTCCCTCCTACCCAGCAGCTCTGATGTGCTGCTATACCAGGACAAGTGGGTGACACAAGCCTGCAGAAAGGGGGCTGGGCAGAGGGTGGAGGAGGTCCTGCCTGTCCTCAGGTTAGTGGAACCACAGAACTTCCTGAGCCTAGAGCTGCTGTGTTACTTAGACCGCTGCCGTGCGGCAGCCACGCTTGTCCTTGAACCCACCTTCCTCCATCCCTGCCAGCCGATAGTGCTAGGGTGAGGAGCTGCCTGGAGCTCACCCCGCTCTTCTTCCAAACCCACAGTCAAGGCCAGGCGCGGTGGCTCACGCCTGTAATCCCAGCACTTTGCGGGG…	0.507489	4540
AP5Z1	FALSE	FALSE	FALSE	TRUE	AGGGACAGTGGCCAGGGACTTCGGTGCAGATTAAGAGCCTGGGCAGCCAGCTTGCTACTGAGGCCAGGCTGATAGGAGCTCAGGAGGGCGCGGGAGTCCTGGGAGAGGAGGCAAGGCCCACGGTGGGCTTGGCACCCTCACAGACACGCGGGGCTGGCCCCCCTGCTCACCCTCTGGGCTTTGTCTCCGAGCCTTTTGCTCCCAGGCAACACTGAGCTGAGCTGAGGGGTGCCATGGAGCGGCTCTGATTGGAGGCTTGAGGCCCTGTGGCTGGGTCGGGTGGAGGCTGCTGGGTCTGTTTCCTAGTCTTTTGTTTTTGGACAGTTGATGGGCAAGAAGAGCTGCAGTAAAAGTAAATCTCCTTTAATAAGCGTCTGTATGAA	0.592689	383
APAF1	FALSE	FALSE	FALSE	TRUE	GAAAATACACGTGTCCCCTGACTTCAAAACATATGTGACTGTGGATAATCTTGGTATTTTATATATTTTACAGACTTTAGAATAAAATAGTTAAGCATTAATGTAGTTGAACTTTTTAAATTTTTGAATTGGAAAAAAATTCTAATGAAACCCTGATATCAACTTTTTATAAAGCTCTTAATTGTTGTGCAGTATTGCATTCATTACAAAAGTGTTTGTGGTTGGATGAATAATATTAATGTAGCTTTTTCCCAAATGAACATACCTTTAATCTTGTTTTTCATGATCATCATTAACAGTTTGTCCTTAGGATGCAAATGAAAATGTGAATACATACCTTGTTGTACTGTTGGTAAAATTCTGTCTTGATGCATTCAAAATGGTTGACATAATTAATGA…	0.375212	2945
APBA1	FALSE	FALSE	FALSE	TRUE	CCGCGGCCACACGCGGTGGCATGCATGGAGGACTCTCCTCTTCGTGGTTGTGTTTCTCGTGCTGCATCCCTGTGTCCACTGAGACTTTCCCCTCTCGCGCCCAGCATTTGGTTTTACACAGGAAGAGAAGAATCCACAAGGACCTCTTTACTCTCTCCGATTTGCTTTTTTTTTTTTTTTTTTTTCAATACCAGGGAAGTTTCGTATGCACTCCCTTGAGGATGGAGAGCAGCCAGCACCCACCTGGTACTGACCCAGGACCATCCTGGAGGGCTTTCTGGGTGTGTCCAGGGGGTGGGCTGTCACTGCTTGAGGGAGAATCCTCCCTTCCCAGGAGGTGCAGACTTCTTAAAAGGAGCTCGCGGGGCAGCAAAGCAGCTGATTCAGCAGTGCCTAAAA…	0.495918	3797
APBA3	FALSE	TRUE	FALSE	TRUE	CCACCTCATCCCTTGCCTGCCACTGTGCCTTCGCCTCCATGGCCCCGGAGCCCCATCCTGGGCCTGCCCTGGCTGGCCAGGACCCCAGCGGTTCTTGGTCCTGTATGATTTCCTAATATAAAAACAGTAAAAGCTTATGCATTTGG	0.568493	146
APBB1	FALSE	FALSE	FALSE	TRUE	AGAAGCCCCCACCTTCCCTCCACCTGCTTGTGTTGGGCCCCAGGGAACTAAAGGGTGTGGGTCAGGGAGGGGTCTAGAGGCTATTCCTAGGCCTCAGGCCTCCCAAATATGCCCCTCCCCAGTAGCTACGGTTCCCTGCCTAGGAGCTGGGGAGGGAGAGATCTAATCCCTTCAAGGAAGTGATAACACTGGAGTGGTAACAAGAGGAGCAGGAAGCAAGGCCAGCCCTGGTTCTCCATCCCCATGTGTTTCAGGTGGAACAGGAGGAACTGGTCCAGGCCAGGCCTCATCCTCCTGGACCCAGCAGGGGCAGAAGGAGGAAGGGACTGGTCCAGGCATGGGTCCCTTCCCCCTGCTCCATGGGCACCTCTGCTGTATTGATATCACTAATAAAGTCTG…	0.578049	410
APBB1IP	FALSE	FALSE	FALSE	TRUE	AGTGATCATTACATTCCTAAGTTGGTACATCCAAAGATCTGAGATACTAAAAAACAAAGATACAGAGCACGCTCATTGCAAAGCTAGAACCCTCCGTAAGCAAGCCACATGGGTGTGTATCAAGAATGTATTAGGGCCATATTCAGGATTTACTGTAGTTTGCTTAAAAAATATTTGTATGCAAAAACTATTTGATAAAACTCAATCTTTTGGGGGAAATGTTTTATTAACATCATATTGAAATGTGGAACTGATTATATATTTCCATGTCCCTGTTCTTAGCTCAGTACATAGAGAATAGAAGGCATTCATTATACATTTTCTGAGTAGAGTGAAATTGAATTTTGTTGAACTTGGCAGCCCTGTTCAGTAGGACAGGTACATCCAAGTATCACTTGT…	0.344284	761
APBB2	FALSE	FALSE	FALSE	TRUE	CTGCACATGCAAAAGGACTCGGCTATTTACCTGAAGATTGACTAGCTACACTAAAGAAAATGAACTCCGCCATCCGACCTTCCATCCAGTTGCTGATGCTTTGTCTTCAGAGAATTTACCCTTAACCAAGCAGTGTTAGACAAGCATGTTCTCTCGTCTTGCCACCATCATGTGATATGAAAAGAAGCATGAATAATTTTTTTTGCTGTAAGTTACATCATGCGCAGTGGAAGGTCTTTTTCTTATTGTAAATATTGTGAACATTACTTAACTTCACACACACACAGAGAAGAGTGTGGCCCCACCCCTCCTAGTGAACTAACGCTGCGTCCTTGGAATGAATGATGCGTGAGTTAGTTTCACTGTCTTCTTGGCTGGACCTGTCACAAGCAACCTTTA…	0.380379	6065
APBB3	FALSE	FALSE	FALSE	TRUE	GGATGCCTACATCCCCCAAGCAAGAGCTACTTCTCCCTCCCGGCTGCAGGCTGTGATCCCCACTGATGCTGATCCCCAGTACTTGAACCCCTGGACACAGATCCTCTGATGTGGACCCAGGACTGCTTCCCCTGCCTGGTCCAGCCCTGGTTGGGGAGGGTGGGCCCAGCTCAGCAGGGACAGTTTGGGGAGAGTCCGAGAGGCTGGGCTGATTCCCTTCTGTGCTCCCACATGCTTCCGGAACAGTGACAGGTGAGTGAAAACCAGGTATCCTGAGCCCCATCCCTGATGTCCCTACTCCATCCCTGCTATATCCCTAGCCTGACTTTCCAGCCTCCTGCAGGCTCCTGCCTCTAACCAGCTTCTACCCCAGCCCCATCTCTGCCCCTGCTAGGGACT…	0.584158	1414
APC	FALSE	FALSE	TRUE	FALSE	TGGGAAGGAGCCAGTAGAGAAGAGAGTTGAAGATCCCTAAGATCAAAGAGAAATGGAGAGAGAAAGGATCCAGAGCACATCTAAAGGGATGGACCTTAGATAGGAGGAGGGGAACTCTGATGTCACAGCAAAAGGTGGCGATGGATATATACGCAGGGTTCAACTACACGAATGGACCATGAAACAGCCAGTGTTTTGAGTTCTAGTAGCACACACTCTGCACCTCGAAGGCTGACAAGTCATCTGGGAACCAAGGTGGAAATGGTGTATTCATTGTTGTCAATGCTTGGTACTCATGATAAGGATGATATGTCGCGAACTTTGCTAGCTATGTCTAGCTCCCAAGACAGCTGTATATCCATGCGACAGTCTGGATGTCTTCCTCTCCTCATCCAGCTT…	0.411846	6483
APC2	FALSE	FALSE	FALSE	TRUE	TGGCCTAGGCCGGCCTTCTGGAACGTTCTCTCCCGGCCCTGCGGCGCGGTCTGGCTGCCCCATGGGCCTGCGCTGTAGACGTCCCCCATAGGTCGCCCCAGGGCCTCTGCCCACCCGAGCCCCACCACTCTCAGAACCCCCGCCCAGCGCACGGCGACCTCGCGCCTCACCGGAAGACCTTGCCTCTGTGCCGCGGAGGTCCAGGAGGAAACGGGGCGGCCGCTAGGCCTCAAGTCCCGACCGTGGAGCGCTGGCAAGGGCGTCCTGGCCCAGCCCTGAGCGCGCGGCCCTTCCCCTGTCGGAAGCCGTTGCTTGACCCCGGGCGAGGGAGGCGGTAGCCTCCGGGTCCGGGTCTGGGTCTGGGTCCGCTGCTTCGCAGGGACAGCGCTGGGGAGGTGA…	0.658199	3031
APCDD1	FALSE	FALSE	FALSE	TRUE	AAGTTTTAGAAAGTTCTATTTTTCCAAACCAGGATTCCTTACTATTGACAGATTTGCTTTACCAAAAGAAAAGACATTTATTCTTTTGATGCACTTGAATGCCAGAGAACTGTCCTTCTTTTTCTCCTCTCCCTCCCTCCCAGCCCCTGAGTCATGAACAGCAAGGAGTGTTTGAAGTTTCTGCTTTGAACTCCGTCCAGCCTGATCCCTGGCCTGAGCAACTTCACAACAGTAATTGCACTTTAAGACAGCCTAGAGTTCTGGACGAGCGTGTTTGGTAGCAGGGATGAAAGCTAGGGCCTCTTATTTTTTTCTCTTAATTATTATTATATTTCTGAGTTAAACTTAGAAGAAACAACTATCAAGCTACAACTTTTCCTGCCATTTTCCTGTGGTTGC…	0.446073	1910
APCDD1L	FALSE	FALSE	FALSE	TRUE	CATTGGACTTGACATCAGGATGGCGGCTCTGGACACCCATTCAACCCTTCAGACTCCCTCCTGGCAGCTGTAGGGAAGGAACCATTCTCCTCTGCTCTGTCATGGATGGATGCACAGCCCCACTGCTTCCAAACTCTGCCTGTGTCCCATGTGGCTCAGGACATGAGCTTAACCCCTGCAAAGCCTATACCACATCCCACAGCCCGGGTCCCCAGTCAAGCACTTGGATGCGGCAGTGATGTTCATCGCTACGTGAGTTTCTAAAGATCACTCCCAATTTTTCTACTTTCCTCATCCTTGGCAGCTCGCCAACAGGTGCAGTCAGGGGGCCACACGGAACACCCCCATCCCATGTTCCCCCCAGTTCTTCCCATCCTGACCCTTGGGATTCCAAGATGG…	0.51569	1689
APCS	FALSE	FALSE	FALSE	TRUE	GGTCTTGACTCAACGAGAGCACTTGAAAATGAAATGACTGTCTAAGAGATCTGGTCAAAGCAACTGGATACTAGATCTTACATCTGCAGCTCTTTCTTCTTTGAATTTCCTATCTGTATGTCTGCCTAATTAAAAAAATATATATTGTATTATGCTA	0.343949	157
APEH	FALSE	FALSE	FALSE	TRUE	GCAGAGAGTCTCCTTCAGGCACCATGAAAGCTGTGCTGCGCAAGGCTGGAGGCACGGGCCCTGGGGAAGAGAAGCAGTTCCTGGAGGTCTGGGAGAAGAACCGGAAGCTCAAGAGCTTCAACCTGTCAGCGCTGGAGAAACATGGGCCTGTTTATGAGGATGACTGCTTTGGCTGCCTGTCCTGGTCGCACTCGGAGACACACTTGTTGTATGTGGCAGAGAAGAAGCGCCCCAAGGCCGAGTCCTTCTTTCAGACCAAAGCCTTGGACGTCAGTGCCAGCGATGATGAGATAGCCAGGCTGAAGAAGCCAGACCAAGCCATCAAGGCATTTTGGGCCCCTGGAGATGCTGGTGTGGTGTTTGTGGGCTGGTGGCATGAGCCCTTCCGGTTGGGCATCC…	0.57377	793
APEX1	FALSE	FALSE	TRUE	FALSE	AGGGCCTGGCTTCCCGAAAGCCCCTTGTGCTGTGTGGAGACCTCAATGTGGCACATGAAGAAATTGACCTTCGCAACCCCAAGGGGAACAAAAAGAATGCTGGCTTCACGCCACAAGAGCGCCAAGGCTTCGGGGAATTACTGCAGGCTGTGCCACTGGCTGACAGCTTTAGGCACCTCTACCCCAACACACCCTATGCCTACACCTTTTGGACTTATATGATGAATGCTCGATCCAAGAATGTTGGTTGGCGCCTTGATTACTTTTTGTTGTCCCACTCTCTGTTACCTGCATTGTGTGACAGCAAGATCCGTTCCAAGGCCCTCGGCAGTGATCACTGTCCTATCACCCTATACCTAGCACTGTGACACCACCCCTAAATCACTTTGAGCCTGGGAA…	0.446571	627
APEX2	FALSE	FALSE	TRUE	FALSE	ACCAATGGAGGCCTGGGGACATCTGGCATGGTCACCCCTGCACATGATCTGAGGCCAGCTCCCCTTCCCTGAGCTGCCTCCTGCTTCTCCCTCAAAGTCTCCTACCCTTCTCTTCCTCTTTTAAGCCCTCTCTTCCTCGCTTTCCTTCCTACCTAGCTCCTTGTTGGTGAGCTTCTTGTGCCTTAATCCTGTGACCCAGCCCCTTACACCACTTTCCACCTTCCTGTCCGAAGTACACGGACACTAGCTGCCCCAGGAAGTTGTGTGATTTTAAATCACTTCTGTCTTTGCTGGAAAGTGTATTTGTGCATAAATAAAGTCTGTGTATTTGTTTCAGGGTTGCACTTTGGACATTGTGGAGGTACTCCATAAAGTTGAGTCAGAGAAGCTATCTCAATA…	0.493218	1622
APH1A	TRUE	FALSE	FALSE	TRUE	CTACCTGGACTGATCGCCTGACAGATCCCACCTGCCTGTCCACTGCCCATGACTGAGCCCAGCCCCAGCCCGGGTCCATTGCCCACATTCTCTGTCTCCTTCTCGTCGGTCTACCCCACTACCTCCAGGGTTTTGCTTTGTCCTTTTGTGACCGTTAGTCTCTAAGCTTTACCAGGAGCAGCCTGGGTTCAGCCAGTCAGTGACTGGTGGGTTTGAATCTGCACTTATCCCCACCACCTGGGGACCCCCTTGTTGTGTCCAGGACTCCCCCTGTGTCAGTGCTCTGCTCTCACCCTGCCCAAGACTCACCTCCCTTCCCCTCTGCAGGCCGACGGCAGGAGGACAGTCGGGTGATGGTGTATTCTGCCCTGCGCATCCCACCCGAGGACTGAGGGAACC…	0.527778	1116
APH1B	FALSE	FALSE	FALSE	TRUE	CCTCAGGGAACCAGCACTTCCCAAACCGCAGACTACATCTTTAGAGGAAGCACAACTGTGCCTTTTTCTGAAAATCCCTTTTTCTGGTGGAATTGAGAAAGAAATAAAACTATGCAGATATGCGTTCCATTCACTTGGCTTTCACACAACTGCTCTCCGAAAGGGGTGCTCAGTGGTGTGCGTCCTGGCTGCACGAGAATCACCTGGGACAGTGTAAAGCCGACTGATTCTGGGCTCCACCTTCCAGAGCTAATTGGCCTGGGCACGTGGTGAGTTTTAAAAGCTTCCCAGGTGATTCTGATGTGCAGCCATGTTGAGACCCACTGGTTTGGTATCCAAATAGGAGCTTCCTGAGAACACCTTAAGTGGATGAGAATCTGGTCTTTAGCTGTCTCCTAA…	0.405082	3345
API5	TRUE	FALSE	TRUE	FALSE	AGGTGGCCGAGGTTGGGGCACACGAGGAAATCGTAGTCGGGGAAGACTCTACTGAATAAGACATCAGCATTCTTCAGCATTGTCATGAGCTTAATATACTTAAATTCTACTACTCATTGGATTGCCGGGGATGTCCCTTTAAACAGACTGCTGCCTTCAGCTAAAAACTTAATGTTCTTTATACCTTTGTATGTATGACCTACTTTTGTAACAGACCATGGTTGTGTCCAAGGTAAAACCACAGTGATATTTTTGGATGCTTTGTCTGCAATCTTGACTTGTTTTTGCAGTATCATTATTCAGACTTCAAATTGTGAATCTTTTAAACATCTTGATAATTTGTTGTTGAGAGCTGTTCATTCTAAAATGTAATGAAATTCAGTCTAGTTCTGCTGATAA…	0.346191	2074
APIP	FALSE	FALSE	FALSE	TRUE	GCCAAAAGAAAGTCTAATTATATACAGAGATAAAGCTAAACGTCCCTCCCACAACACGGAATTATGGGAGCTACAAGATGAGATTTGAGTGGGGACACAGAGCCAAACCATATCATCCAGCGTCCAGGAAGATTCAGGTCACTCAGACTTGAAGGATGGGGTCAGTAAAACTCTGTGGAAACAAAAAGGTGTAGCAGAAAGACCACTAGATGGGTGTCAGGAAACTTTGACTCTAACCCCAGCAAGGCCACTCGCATTTTCTCTGTGATTTTGTATCTCAAGTATTTTAACCATCTCTTGAAATGTTCTTGGGCCTCAGCCTAGGCACTATGCCTATAGAAACTAATGGATAAAGCAACCCTGCTTCTTTAAAGGCCTGGAGGCAAGTGCAATCACGTT…	0.423751	3823
APLF	FALSE	FALSE	FALSE	TRUE	AGTAAATAATGAAAACCTCCATTTGCCTCATCCTTCGACCTCATTGCGTTACTAATTTTTTGGAAATGCCACAATCATTTTCTGCAATCACATTAAGTAACACAGAGATGAATAATATTAAGACTAATGCACAGAGAAACAAACTTCCAATAGAGGAACTTGGTAAAGTTTCTAAACATAAAATTGCCACTAAAAGAACACCACATAAAGAAGATGAGGCAATGAGCTGTTCTGAAAATTGTTCGAGTGCCCAGGGCGACTCACTTCAGGATGAGTCTCAAGGGTCTCATTCTGAGTCCAGCTCTAATCCCTCCAATCCTGAAACTTTGCATGCAAAGGCAACTGATTCAGTTCTACAAGGTTCTGAAGGAAACAAGGTCAAGAGGACATCCTGCATGT…	0.33606	2934
APLNR	FALSE	TRUE	FALSE	TRUE	GGCTGGGAGCAGAGAGAAGCCTGGCGCCCTCGGCCCTCCCCGGCCTTTGCCCTTGCTTTCTGAAAATCAGGTAGTGTGGCTACTCCTTGTCCTATGCACATCCTTTAACTGTCCCCTGATTCTGCCCCGCCCTGTCCTCCTCTACTGCTTTATTCTTTCTCAGAGGTTTGTGGTTTAGGGGAAAGAGACTGGGCTCTACAGACCTGACCCTGCACAAGCCATTTAATCTCACTCAGCCTCAGTTTCTCCATTGGTATGAAATGGGGGAAAGTCATATTGATCCTAAAATGTTGAAGCCTGAGTCTGGACGCAGTAAAAGCTTGTTTCCCTCTGCTGCTTTCTTAGATCTGCAATCGTCTTTCCTCCCTTCTTTCCTTGTAGTTTTTCCCCCACCACTCT…	0.522697	2269
APLP1	FALSE	FALSE	FALSE	TRUE	GTGAGGCCCTGCTGGTGCCTGAAGGCTGCCGGTTCTTGCACCAGGAGCGCATGGACCAATGTGAGAGTTCAACCCGGAGGCATCAGGAGGCACAGGAGGCCTGCAGCTCCCAGGGCCTCATCCTGCACGGCTCGGGCATGCTCTTACCCTGTGGCTCGGATCGGTTCCGTGGTGTGGAGTATGTGTGCTGTCCCCCTCCAGGGACCCCCGACCCATCTGGGACAGCAGTTGGTGACCCCTCCACCCGGTCCTGGCCCCCGGGGAGCAGAGTAGAGGGGGCTGAGGACGAGGAAGAGGAGGAATCCTTCCCACAGCCAGTAGATGATTACTTCGTGGAGCCTCCGCAGGCTGAAGAGGAAGAGGAAACGGTCCCACCCCCAAGCTCCCATACACTTGCAG…	0.594957	1864
APLP2	FALSE	FALSE	FALSE	TRUE	GTGATGTCCTGCTAGTTCCAGAAAAGTGCCAGTTTTTCCACAAAGAGCGGATGGAGGTGTGTGAGAATCACCAGCACTGGCACACGGTAGTCAAAGAGGCATGTCTGACTCAGGGAATGACCTTATATAGCTACGGCATGCTGCTCCCATGTGGGGTAGACCAGTTCCATGGCACTGAATATGTGTGCTGCCCTCAGACAAAGATTATTGGATCTGTGTCAAAAGAAGAGGAAGAGGAAGATGAAGAGGAAGAGGAAGAGGAAGATGAAGAGGAAGACTATGATGTTTATAAAAGTGAATTTCCTACTGAAGCAGATCTGGAAGACTTCACAGAAGCAGCTGTGGATGAGGATGATGAGGATGAGGAAGAAGGGGAGGAAGTGGTGGAGGACCGAGATT…	0.517978	1780
APMAP	FALSE	FALSE	FALSE	TRUE	CCCTCCCAGATAGCTGCCCCTGCCACGCAGGCCAGGAGTCTTCACACTCAGGCACCAGGCCTGGTCCAGGAGGAGCTGTGGACACAGTCGTGGTTCAAGTGTCCACATGCACCTGTTAGTCCCTGAGAGGTGGTGGGAATGGCTGCTTCATTCCTCGAGGATGCCCGGGCCCCACCTGGGCTTGTCTTTCTGTTTAGAGGGAAGTGTAACATATCTGCCATGAGGAACATAAATTCATGTAAAGCCATTTTCTCTTAAACAAAACAAAACTTTCTAAGTACAGTCATTCTCTAGGATTTGGGAAGCTCCTTGCACTTGGAACAGGGCTCAGGTGGGTGGAGCAGTAAGGCACTACCCAGAGAGCTTGCTGCTGCGGCCCTGTCCTGCGGCCTCAAAGTT…	0.492117	888
APOA1	FALSE	FALSE	FALSE	TRUE	GGCGCCCGCCGCCGCCCCCCTTCCCGGTGCTCAGAATAAACGTTTCCAAAGTGGGAA	0.649123	57
APOA2	FALSE	FALSE	FALSE	TRUE	AAAGAGTGTGTGTGTGTGTGTGTGTGTGTGTGTGTGTGTGTGTGGGCAGGAGCTTTGGTTCGGAGACAGGCAAAGGAGCCATGTGTGGAGAGCCTGGTTTCTCAGTACTTCCAGACCGTGACTGACTATGGCAAGGACCTGATGGAGAAGGTCAAGAGCCCAGAGCTTCAGGCCGAGGCCAAGTCTTACTTTGAAAAGTCAAAGGAGCAGCTGACACCCCTGATCAAGAAGGCTGGAACGGAACTGGTTAACTTCTTGAGCTATTTCGTGGAACTTGGAACACAGCCTGCCACCCAGTGAAGTGTCCAGACCATTGTCTTCCAACCCCAGCTGGCCTCTAGAACACCCACTGGCCAGTCCTAGAGCTCCTGTCCCTACCCACTCTTTGCTACAATAAAT…	0.519417	412
APOA4	FALSE	FALSE	FALSE	TRUE	GCTGCCCCTGGTGCACTGGCCCCACCCTCGTGGACACCTGCCCTGCCCTGCCACCTGTCTGTCTGTCTGTCCCAAAGAAGTTCTGGTATGAACTTGAGGACACATGTCCAGTGGGAGGTGAGACCACCTCTCAATATTCAATAAAGCTGCTGAGAATCTAGCCTCAA	0.550898	167
APOB	FALSE	FALSE	FALSE	TRUE	ATTTCACTGAAGATGACTCTTGGATCACATGGAAATGTTAACATTTAGAAATTAAGCTATTCATAATGTTAGCTGTATTTTTAAGAGCATTAATTTATTCATCTGGAAAACAATGTTCGGTATACCTTCCTCTACCTTTGCTGAAGGTCCTTTTATTTTTATTTTTATTTTTTTAATTTTTTGAGATGGAGTCTTGCTCCCAGGCTGGAGTGCAGTGATACAATCTCGGCTCACTGCAACTCTGCCTTCCGGGTTCAAGCAATTCTCCTGCCTCAGCCTCCCAAGTAGCTGGGACTGTGGACGTGCACCAGCATGCCCGGCTAATTTGTGTATCTTTAGTAGAGACAAGCCTGTTGACAACCATGTCAGGCTGGTTTCGAACTCCTGACCTCAAGTGAT…	0.379808	624
APOBEC1	FALSE	FALSE	FALSE	TRUE	GCCGGAAGATCTGGCGAAGCTCAGGCAAAAACACCACCAATCACGTGGAAGTTAATTTTATAAAAAAATTTACGTCAGAAAGAGATTTTCACCCATCCATGAGCTGCTCCATCACCTGGTTCTTGTCCTGGAGTCCCTGCTGGGAATGCTCCCAGGCTATTAGAGAGTTTCTGAGTCGGCACCCTGGTGTGACTCTAGTGATCTACGTAGCTCGGCTTTTTTGGCACATGGATCAACAAAATCGGCAAGGTCTCAGGGACCTTGTTAACAGTGGAGTAACTATTCAGATTATGAGAGCATCAGAGTATTATCACTGCTGGAGGAATTTTGTCAACTACCCACCTGGGGATGAAGCTCACTGGCCACAATACCCACCTCTGTGGATGATGTTGTACGCAC…	0.436718	719
APOBEC2	FALSE	FALSE	FALSE	TRUE	GGCAACTGGGCTTTGCCTCACGTATTCCTGCTGCCACCAAGAGACAGCAATGACATGTACAGCCATCTGGGACATGCCTGTCTTCCTAATACCATTTGGAGCTGGACAACATTTGACACCAACCAATCATACTGGACAAGGCCCTTAGAGGACTTGAAATATACTTCTCATGCTGTAGTTTATTTAGGCTGTGACTCTCTCTCTAATGCTGCTCTCGGGAAGGACGAAAGTGACCTGCAAGGAGAGAAATGCAACCATACATGGGCTCCAGTCAACTATGGGACTGAAGGTCCTAATTGCTCACCCAAGGGGGCTGCTTAACACAAACAGCCTCAGACCCGAGGTTTAGATTTCTGAAATATGCATTTTATGTTAAGTTGGGTATTTTTTTAAAAAAAG…	0.439815	432
APOBEC3B	FALSE	FALSE	FALSE	TRUE	GACTGCGCATCTTCGCTGCCCGCATCTATGATTACGACCCCCTATATAAGGAGGCGCTGCAAATGCTGCGGGATGCTGGGGCCCAAGTCTCCATCATGACCTACGATGAGTTTGAGTACTGCTGGGACACCTTTGTGTACCGCCAGGGATGTCCCTTCCAGCCCTGGGATGGACTAGAGGAGCACAGCCAAGCCCTGAGTGGGAGGCTGCGGGCCATTCTCCAGAATCAGGGAAACTGAAGGATGGGCCTCAGTCTCTAAGGAAGGCAGAGACCTGGGTTGAGCAGCAGAATAAAAGATCTTCTTCCAAGAAATGCAAACAGACCGTTCACCACCATCTCCAGCTGCTCACAGACACCAGCAAAGCAATGTGCTCCTGATCAAGTAGATTTTTTAAAAA…	0.452252	555
APOBEC3C	FALSE	FALSE	FALSE	TRUE	GGGGTCTCCCTGGGCCTCATGGTCTGTCTCCTCTAGCCTCCTGCTCATGCTGCACGGGCCTCCCCTCCACCCTGGACCCGCTCTGTTTCTGCCTGGTCATCCTGAGCCCCTCCTGGCCTCAGGGCCATTCCACAGTGCTCCCCTGCCTCACCGCTTCCTCCTCGCTCTTCCAGACTCTTCCTGCAGAGGCTCCTTTCTGCCTCCATGGCTATCCATCCACCCCCACAGACCCCGTTCCTCCAGCCTGCGTGCCCCTAACCTGGCTTTTCCCATCTCCCCAGCATAACCAAATCTTACTAAACTCATCCTAGGCTGGGCATGGTGACTCACGCCTGTAATCCCCCAGCAATTTGGGAGGCAAAGGTGGGAGAATCGCGTGAGCCCAGGAGTTCCAGACCA…	0.495165	1965
APOBEC3D	FALSE	FALSE	FALSE	TRUE	GGGGTCTCCCTGGGCCTCATGGTCTGTCTCTTCTAGCCTCCTGCTCATGCTGCACGGGCCTCCCCTCCATCCTGCACCAGCTGTGCTTTTGCCTGGTCATCCTGAGCCCCTCCTGGCCTCAGGGCCATTCCATAGTGCCCCCCTGCCTCACCACCTCCTCCCCGCTCTCCCAGGCTCTTCTTGTAGAGGCTCTCCATCCACCTCCCCAGTCCTGTTCCCCCAGCCTGGGTGCCCCTAACTTGACTCTTCCCATCTCCCCAGCATAACCAAATCTTTTTTTTTTTTTTTTTTTTTTGAGACGGAGTTTCACTCTGTCGCCCAGACTAGAGTGCAATGGCTGGATCTCAGCTCACTGCAAACTCTGCTTACTGGGTTCAAGTGATTCTCCTGTCTCAGCTT…	0.508333	960
APOBEC3F	FALSE	FALSE	FALSE	TRUE	GGGGTCTCCCCGGGCCTCATGGTCTGTCTCCTCTAGCCTCCTGCTCATGTTGTGCAGGCCTCCCCTCCATCCTGGACCAGCTGTGCTTTTGCCTGGTCATCCTGAGCCCCTCCTGGCCTCAGGGCCATTCCATAGTGCTCCCCTGCCTCACCACCTCCTCTCCGCTCTCCCAGGCTCTTCCTGCAGAGGCCTCTTTCTGCCTCCATGGCTATCCATCCACCCACCAAGACCCTGTTCCCTGAGCCTGCATGCCCCTAACCTGCCTTTTCCCATCTCCCCAGCATAACCTAATATTTTTTTTTTTTTTTTGAGACGGAATTTCGCTCTGTCACCCAGACTGGAGTGCAATGGCTTGATCTTGGCTCACTGCAAACTCTGCCTACCAGGTTCAAGCGATTC…	0.507819	1215
APOBEC3G	FALSE	FALSE	FALSE	TRUE	AGGATGGGCCTCAGTCTCTAAGGAAGGCAGAGACCTGGGTTGAGCCTCAGAATAAAAGATCTTCTTCCAAGAAATGCAAACAGGCTGTTCACCACCATCTCCAGCTGATCACAGACACCAGCAAAGCAATGCACTCCTGACCAAGTAGATTCTTTTAAAAATTAGAGTGCATTACTTTGAATCAAAAATTTATTTATATTTCAAGAATAAAGTACTAAGATTGTGCTCAATACACAGAAAAGTTTCAAACCTACTAATCCAGCGACAATTTGAATCGGTTTTGTAGGTAGAGGAATAAAATGAAATACTAAATCTTTCTGTA	0.369565	322
APOBEC3H	FALSE	FALSE	FALSE	TRUE	AGTGTGGATGTTTTAGAGAATGACTTAAGAAGTTTGCAGCTTGGACCCGTATCCCACTCATTATCAAGAAGCAACTCAAGATGACTTTCCCTGGGGCATGTCAGTTGCCTCATAGCCTGCTGGTCCTGTAAGCAAGCACTAAGCTCCACAGTGCCAGTTCCTTGCCCCAACCTGGCCCCATCCAAGTACAGAAGACCTTCCTTTCCTCCTTTTTCCATATTGCTTTCTGTTCTAAGTGGGTGAATAATTTTATAATTGAAAAAATAAAGATAAAGTCTGTAAATCCAGCCGGGTACGGTGGCTCACGCCTGTAATCCTAGCACTTTGGGAGGCTGAGATGCTCGGCCAATAAATTTCTATTGTTTATGAA	0.443243	370
APOBEC4	FALSE	FALSE	FALSE	TRUE	AATCTACATTCCTACAGCATGAAACCAATTACCAAGGGACTTATTAGATAGGCAATAAAAATCTGGAAACTTTCTCTCTCAGGGCTGAGCCAAGATGGAGATAAACTGATGCACTAAAAGCAAACCTTGAATTATTTACCATATCAACTATTATAAAGTTACACTATTTTAAACATAATCCAAAATGTTTCCATAAGCAACTTGATCTCTCTCCTTTATTTTGAAAGTGGCAGTATCAAAATGGAACCATTAGCAGCTTGCTAATATTTTGATGCAGAAAAGGAATCTCATTATTCTATTTTACTCACATCATCTTTCCACTACAAAAGCCCATGGACAAAATAGCTACCTAAATTTGTTTCGGTAAAAAATTTACTGTAAAATTGAAAAACAGCCTGA…	0.363422	1274
APOC3	FALSE	FALSE	FALSE	TRUE	GACCTCAATACCCCAAGTCCACCTGCCTATCCATCCTGCGAGCTCCTTGGGTCCTGCAATCTCCAGGGCTGCCCCTGTAGGTTGCTTAAAAGGGACAGTATTCTCAGTGCTCTCCTACCCCACCTCATGCCTGGCCCCCCTCCAGGCATGCTGGCCTCCCAATAAAGCTGGACAAGAAGCTGCTATGA	0.569149	188
APOC4	FALSE	FALSE	FALSE	TRUE	AATGTTCATAAAAGCCAGGTGTGGTTGTGGCGGGTGCCTGTAGTCCCAGCTACTCAGGAGGCTGAGGTAGGATGATGGCTTGAGCCCAGGAGTTCGAGACCAGCCTGGGCAACACAGCGAGATCTCTTGGGGGTAAAACAAAAAGAAAAAAAAAAGTTCATACTTCTCCAATAAATAAAGTCTCACCTGTG	0.47644	191
APOD	FALSE	FALSE	FALSE	TRUE	TGGAAAACGGAAAGATCAAAGTGTTAAACCAGGAGTTGAGAGCTGATGGAACTGTGAATCAAATCGAAGGTGAAGCCACCCCAGTTAACCTCACAGAGCCTGCCAAGCTGGAAGTTAAGTTTTCCTGGTTTATGCCATCGGCACCGTACTGGATCCTGGCCACCGACTATGAGAACTATGCCCTCGTGTATTCCTGTACCTGCATCATCCAACTTTTTCACGTGGATTTTGCTTGGATCTTGGCAAGAAACCCTAATCTCCCTCCAGAAACAGTGGACTCTCTAAAAAATATCCTGACTTCTAATAACATTGATGTCAAGAAAATGACGGTCACAGACCAGGTGAACTGCCCCAAGCTCTCGTAACCAGGTTCTACAGGGAGGCTGCACCCACTCCATG…	0.476562	512
APOE	FALSE	FALSE	FALSE	TRUE	ACGCCGAAGCCTGCAGCCATGCGACCCCACGCCACCCCGTGCCTCCTGCCTCCGCGCAGCCTGCAGCGGGAGACCCTGTCCCCGCCCCAGCCGTCCTCCTGGGGTGGACCCTAGTTTAATAAAGATTCACCAAGTTTCACGCA	0.657343	143
APOF	FALSE	FALSE	FALSE	TRUE	AAGAATGTGGTAACCACAGAATTAATAACTGTACTACCCTGACAAGCTATATACATGTCTTCAAAATTTTAATCTGATTTATCCAGGAGGAAGGCTGTACAGTAAAACGTAAGAACGTAAATGTTTGGGTGTTGAAGTCACAGGGTTTGGTTTCGAATCTAGGCTCCACTTGTTAGAGCCTCGGTGATCACTGAATAGTAACTTCTTTCTTGAACTAAGATCAGTTTTGAAGTTTCTAAAGGAGATAGAATGATTTTAACCTCAATGAGTTGCCCTGTAAATTTAAAATGATACAATGAATCTAAAATGCTTATCACAGTACTTTCAATAAATAGCTATTAGCCAGGTGCGGTGGCTCACGCCTGTAATCCCAGCACTGTGAGAGGCTGAGGCGGGATG…	0.429878	656
APOH	FALSE	FALSE	FALSE	TRUE	GGTGGTTTTCAGATTCCACACAAAATGTCACACTTGTTTCTTGTTCATCCAAGGAACCTAATTGAAATTTAAAAATAAAGCTACTGAATTTATTGCCGCA	0.34	100
APOL1	FALSE	FALSE	FALSE	TRUE	CCACAGGGCAGGGCAGCCACCAGGAGAGATATGCCTGGCAGGGGCCAGGACAAAATGCAAACTTTTTTTTTTTTCTGAGACAGAGTCTTGCTCTGTCGCCAAGTTGGAGTGCAATGGTGCGATCTCAGCTCACTGCAAGCTCTGCCTCCCGTGTTCAAGCGATTCTCCTGCCTTGGCCTCCCAAGTAGCTGGGACTACAGGCGCCTACCACCATGCCCAGCTAATTTTTGTATTTTTAATAGAGATGGGGTTTCACCATGTTGGCCAGGATGGTCTCGATCTCCTGACCTCTTGATCTGCCCACCTTGGCCTCCCAAAGTGCTGGGATTACAGGCGTGAGCCATCGCTTTTGACCCAAATGCAAACATTTTATTAGGGGGATAAAGAGGGTGAGGTAAA…	0.51503	1497
APOL2	FALSE	FALSE	FALSE	TRUE	CCCCAGAGCAGTGCAGCCACCAGGGCAGAAATGCCGGGCACAGGCCAGGACAAAATGCAGACTTTTTTTTTTTTTTTTTTTTTTTTTTGAGATGGAGTCTCGCTCTATCGCCCAGGATGGAGTGCAGTGGCTCAATCTCGGCTCACTGCAAACTCCGCCTCCCGGGTTCACACCATTCTCCGGCCTCAGTCTCCCGAGTAGCTGGGACTACAGGCACCTGCCACCACGCCCGGCTAATTTTTTTGTATTTTCACTGGAGACGGGGTTTCACTGTGTTAGCCACGATGGTCTCCATCTCCTGACCTCGTGATCTGCCCACCTCGGCCTCCCAAAGTGCTGGGATTACAGGCGTGAGCCACCGCGCCTGGCCAAAATGCAGACATTTTATTAGGGGGATAA…	0.517069	1201
APOL3	FALSE	FALSE	FALSE	TRUE	GAGTGAGGGCAGAGGGAGCTGGAGCAAGTAGAATTTCTCTAAATACCAGCTGGCTGGGGCCCAGGAGATTAAAAAACACCGGGCTAGGTTGGTCTTGGCATTTGCTGACACGCAAAGGGATTGCAGAGATCCAGCCCCTCCAACCTCCCTCTGTCCACAGGTGGCTCACATTCAGTCCCACAATTTGCTTTCTCCTCCTCAAGGGTTAAGAAAAAAAACGAACCCTTCCAGTCAGGTCAGTGACTGGAGAGCTCCATGGAAAGTCTCTCAGTGACCTGGCTGCTGGCACCATGGACTCAGAAAAGAAACGCTTTACTGAAGAGGCCACCAAATACTTCCGGGAGAGAGTCAGCCCAGTGCATCTGCAAATCCTGCTGACTAACAATGAAGCCTGGAAGA…	0.513451	2156
APOL5	FALSE	FALSE	FALSE	TRUE	GAAGAGTTGGTCACCCTGTCACCACTGAACCTTGATTTAACAGAGGCAAAATGCAAGTCTTCCCTGAAGAATACTGGGGGTAGGGAAACTTCTAGTGGCAATGATAAAACCAGCAGCAATGATAATAGAAGGCAAA	0.433824	136
APOL6	FALSE	FALSE	FALSE	TRUE	ATGTTCCTCAGGACATGGCATACAATGGCCTTGGAGGTCCAAATAATATCAAGTACATCTTGGAGATGAGGGTGCCTGTCCTGGACAGACCTCGGCATGCCTTCTGTTTCTCCTTCAATGCTCCTTAAGGCCTATGTGCTGGGAAAAGGGTCTTCCCTGTTTGTTTGTTTGTTTGTTTGTTTGTTTGTTTTGAGACAGGGTCTCTGTTGCCCAGGCTGGAGTGCAGTGGCGTAATCTCGGCTCACTGCAACCTCTGCCTCCTGAGTGCAAGCAAGTCTCCTGCCTCAGCCTCCCAAGTAGCTGGGATTACAGGCACGCACCACCACGCCCAGCTAATTTTGGTATTTTTTTGTAGAGACAGGGTTTCACCATTTTGGCCAGGCTGGTCTCGAATTCCTG…	0.385113	8813
APOLD1	FALSE	TRUE	TRUE	FALSE	GAACATCCTTTCCCCCTAATGACCGAGGCCAGCAAATCATCCTCATGGGATGCTCCAGAATTTGTAGCTCCCTTAGGAAAACACCAAGCTGGGTTAGGAGCCGAAGGCAAAGGATGAGAAAAACTGTTTTTGAAGTGGGCAGGTCCCCAAAGCCCTTCTTTTCCCATCACTGTGACATCTGCCTGGGCTTGAGTGCTACGGACTTTTCAGTCTTCCTAGTGGAAAAATGTGACCCAAAAACTCTTTTTCCTTTATCAAAAACTTTCTGTCTAAACACAGCTGGGCAGGCACTCCTGTTTTAAAGTTATTTCGGGGTCCCTGACCCTGCCCTGGTGGCTTGGCCTGAGACTGGAGAGAGTGCCATCCTCTGGGTCCTCTCCAAGTCCTACTAGTCTTTGA…	0.411379	3814
APOM	FALSE	FALSE	FALSE	TRUE	AAGAGGCTCGTGTGATGTCACCAGAGGGATGTGGCTAAGAGCTGTGATGTCACCTGAGGGAGGCAGGATGGGTTCTGGGCTACTCAAAAGAGAGGTTTCTGAGTTTGCACTGGATAAAGGGGGCAGAGGGTCATACGTGGAGGGAAAAGAGCCTTAGAGACTCCCCTTTGACACAGGGAATGAAAGAACACGTTCTCCCCCACCCCATTACTATCAACTTTGCTTTTCTCCCTGGACTTCCCTTCTGTCCTTCTTTTTCCCTCCCCCCATCACAGAGGCCTGTGAGCTGTCCAA	0.520408	294
APOO	FALSE	FALSE	FALSE	TRUE	AGAAGCTAGTGTATCCGCCTGGTTTCATGGGATTAGCTGCCTCCCTCTATTATCCACAACAAGCCATCGTGTTTGCCCAGGTCAGTGGGGAGAGATTATATGACTGGGGTTTACGAGGATATATAGTCATAGAAGATTTGTGGAAGGAGAACTTTCAAAAGCCAGGAAATGTGAAGAATTCACCTGGAACTAAGTAGAAAACTCCATGCTCTGCCATCTTAATCAGGAAAAACTAGACCAGACCTCTGTTATCTTCTGTGAAATCATCCTACAAGCAAACTAACCTGGAATCCCTTCACCTAGAGATAATGTACAAGCCTTAGAACTCCTCATTCTCATGTTGCTATTTATGTACCTAATTAAAACCCAA	0.413514	370
APOOL	FALSE	FALSE	FALSE	TRUE	AGTAGACTGCATGCAGAGACTACACAGAAAACTACAAGATGTGTGGCGTTGCAAATAATGATGAAAATAAATCATGTAATGGGTAACTGATACATAGAGTATTACCTAAACCAAGTTTCTCCCTTACATTTCCAAATATGCCATTTGATAAATTACATAAGTGGTTAACACACAAACTGTGAATGCAGTGTAAACAATATTAAATGATTGATGAGGAGACTTAGGTAGAAGTATTAGCTTGCATTTGATGACCTTTAAGGGCACTTAAAAAAAAATGAAGACATGAATTCTAGTGAGATTAAAATCTAAAAATACATATATATATATGTATGTATAAATACATACATATTTATACATGTATAAATACGTATTTATACATATATGTATAAATACATATAC…	0.365023	5638
APOPT1	FALSE	FALSE	FALSE	TRUE	GAGTCCACTCTGACCCAGCCAGAGTCCAGGTTTCCACAGGAAGCAGATGGAGCTCCTTTCACAGGGGCTCTGAGAAAAACTGGAGCTGATCTCAAGAAGCCCCACATCTTCCTAAGGGGCCCCATGGCCTGTTTGGGGGCAGGGTAGGTCCTGGGGCACTGTGGGCCGCCTGCCTGCTGATGTGGGCTCTAGGCCAGCTTGTTGTCACGTACGTGGTGTGAAATAAAGCCCAAGCACTGGGTGCCCGTTTCCTGTGTTTCGAATTATACCAATTCAAAACAGAACTATTTAAAAATATTGGCCAGGCACGGTGGCTCACACCTGTAATCCCAGCACTTTGGGAGGCCGAGGCGGGTGGATCACTTGAGATCAGGAGTTCAAGATCAGTCTGGACAACAT…	0.502367	1901
APP	TRUE	FALSE	FALSE	TRUE	ACCCCCGCCACAGCAGCCTCTGAAGTTGGACAGCAAAACCATTGCTTCACTACCCATCGGTGTCCATTTATAGAATAATGTGGGAAGAAACAAACCCGTTTTATGATTTACTCATTATCGCCTTTTGACAGCTGTGCTGTAACACAAGTAGATGCCTGAACTTGAATTAATCCACACATCAGTAATGTATTCTATCTCTCTTTACATTTTGGTCTCTATACTACATTATTAATGGGTTTTGTGTACTGTAAAGAATTTAGCTGTATCAAACTAGTGCATGAATAGATTCTCTCCTGATTATTTATCACATAGCCCCTTAGCCAGTTGTATATTATTCTTGTGGTTTGTGACCCAATTAAGTCCTACTTTACATATGCTTTAAGAATCGATGGGGGATGC…	0.369643	1120
APPBP2	TRUE	FALSE	FALSE	TRUE	GGGAGGACCTCAGTTAACCAATTACCTTTTCCCGGATTCCAGGGAATTCATACTGTGAAATCAAAACCATGTTGTTTTGGGGGGCTGGAATTTGCATTGAAACACTGGTCCAGTCCATTGAAGACCCTATTTTGGGTGATCCCTATCTTGCAGAATGTCTGTAGGAATAAGCATATATTCAGTTATATTCAGCATGTACCGCATGTGTAAGTAGTCTGGCCCACATTTTCAACCTAGTAGAACAAACAACAGGAAATCTTTTTTTTGTTGTTTTTAAAAAATTCATTTTGCAGAAAGCCTGAAAGAAAAAAAATACCCCTAAATAAAACTATTTAAGAGTTTAAAAGAGTTGCATTCTTATTATGTAAGGATGATTTTAACAACTTTTTAATATGTAAT…	0.356273	4432
APPL1	FALSE	FALSE	FALSE	TRUE	GCTTATACTTTTGGTAGATATTCCCCCTTGGAATTTGACAGTTTCTATGGTGAAATGGCAGAAGGTAACAACTATGTTGAAATATCAAGGAGGAGATTAAGCTTTATATTTGCTTATTTGTTGTAGCTACATTTTAAAAAAAAGATTGAACTTGATGACTTAGGTTTGCATTGATCTTTTTTCCCCCTTAAACATAATGTACTATGTATTAACATCTAAAGGAAACCTGCTCATCTCCCTGAAGCAGACTGCTGAGGAATTACATTTGCTCAAGAATTTTTTCCGTCAAATTGTGAACTTTTAATTCTTGCATTGTAATTGGCTGTGTCCATAAGAAATCATTTATTCTTCAGGCTTAGACATTCATGGATATGCTTTTCTTTCATTAGGAACATTTTG…	0.342502	3781
APPL2	TRUE	FALSE	FALSE	TRUE	AACTGGAAGCCGAGGCGGAAAAGATGCGGGTGTCCCAGCAAGAATTACTTTCTGTTGATGAATCTGTTTACACTCCAGACTCTGATGTGGCCGCACCACAGATCAACAGGAACCTCATCCAGAAGGCTGGTTACCTTAATCTTAGAAACAAAACAGGGCTGGTCACCACCACCTGGGAGAGGCTTTATTTCTTCACCCAAGGCGGGAATCTCATGTGTCAGCCCAGGGGAGCCGTGGCTGGAGGTTTGATCCAGGACCTGGACAACTGCTCAGTGATGGCCGTGGATTGCGAAGACCGGCGCTACTGCTTCCAGATCACCACGCCCAATGGAAAATCGGGAATAATCCTCCAGGCTGAGAGCAGAAAGGAAAATGAAGAGTGGATATGTGCAATAAACA…	0.424031	2297
APRT	FALSE	FALSE	FALSE	TRUE	GCTGGAGATTCAGAAAGACGCCCTGGAGCCAGGACAGAGGGTGGTCGTCGTGGATGATCTGCTGGCCACTGGTGGAACCATGAACGCTGCCTGTGAGCTGCTGGGCCGCCTGCAGGCTGAGGTCCTGGAGTGCGTGAGCCTGGTGGAGCTGACCTCGCTTAAGGGCAGGGAGAAGCTGGCACCTGTACCCTTCTTCTCTCTCCTGCAGTATGAGTGACCACAGGGCCTCCCAGCCCAACATCTCCAGCTGGATCCCAGGGAAATATCAGCCTTGGGCAACTGCAGTGACCAGGGGCACCGGCTGCCCACAGGGAACACATTCCTTTGCTGGGGTTCAGCGCCTCTCCTGGGGCTGGAAGTGCCAAAGCCTGGGGCAAAGCTGTGTTTCAGCCACACTGA…	0.596413	446
APTX	FALSE	FALSE	FALSE	TRUE	CAAGGGATATGTCAAGGTAAAGCAGGTAGGAGTCAATCCCACCAGCATTGACTCAGTCGTAATTGGGAAGGACCAAGAGGTGAAGCTGCAGCCTGGCCAGGTTCTCCACATGGTGAATGAACTTTATCCATATATTGTAGAGTTTGAGGAAGAGGCAAAGAACCCTGGCCTGGAAACACACAGGAAGAGAAAGAGATCAGGCAACAGTGATTCTATAGAAAGGGATGCTGCTCAGGAAGCTGAGGCTGGGACAGGGCTGGAACCTGGGAGCAACTCTGGCCAATGCTCTGTGCCCCTAAAGAAGGGAAAAGATGCACCTATCAAAAAGGAATCCCTGGGCCACTGGAGTCAAGGCTTGAAGATTTCTATGCAGGACCCCAAAATGCAGGTTTACAAAGA…	0.457859	1756
AQP1	FALSE	FALSE	FALSE	TRUE	AAGGGGTCTGGCCCGGGCATCCACGTAGGGGGCAGGGGCAGGGGCGGGCGGAGGGAGGGGAGGGGTGAAATCCATACTGTAGACACTCTGACAAGCTGGCCAAAGTCACTTCCCCAAGATCTGCCAGACCTGCATGGTCAAGCCTCTTATGGGGGTGTTTCTATCTCTTTCTTTCTCTTTCTGTTTCCTGGCCTCAGAGCTTCCTGGGGACCAAGATTTACCAATTCACCCACTCCCTTGAAGTTGTGGAGGAGGTGAAAGAAAGGGACCCACCTGCTAGTCGCCCCTCAGAGCATGATGGGAGGTGTGCCAGAAAGTCCCCCCTCGCCCCAAAGTTGCTCACCGACTCACCTGCGCAAGTGCCTGGGATTCTACCGTAATTGCTTTGTGCCTTTGGGC…	0.531532	1887
AQP10	FALSE	FALSE	FALSE	TRUE	AATAGCTCTCTTGGCTTCTTAGGACAGTGTTCTTTCTCCAAGTCATATTCTCCCCCTTTCTCCCTTGCTTCCCTCCCAACTTTTCACTGAAACAGTAAGATTTAGAGGTTGTGTTCTTAGGCATGCCACATTACTTCCATGCACATTAGTGACTTCATCAGCAAAATTAATATATTCAGATAATTCCCTAAGGCAAGAGGCTGGACCAAGCTCTCCTGGGGTTCCCTCTTCTAAATACTATGCTTTGGTGACAAGGCAATCCTCTTCCTGGTGTCTACCACCCTGGGAACAACTTTAGGGCACTCTCTTGTTACTGCCCCCCGTCCTTGGAGAGGGGAAGGCTAAGGGAGTCACTCCTGATACCTTCCCACTGTCCTTCTTTTGCAGTGCTGGTAATGG…	0.558351	1431
AQP11	FALSE	FALSE	FALSE	TRUE	CTGTTCCAAAGACTCAGACTAACATACAGGACAGTCCAGCTGGATGTGATAAAGATTTTATCACCTCATATGGAAAACACCGGCTGCACTGGATTCATCAGTGTTAACTTCCTTTGAGGAAGCTGCCTTATAGTTTTCATCACTGGGACTTTAAAAAAAAATTACTGTGAAAATGAGGTATTCTGTACTTCTCAGTTAAGACTTGTTCTTTGAGTGATGTATTAAATGCTGCTAGAAAAGCCTCATTACATTAAATATAAATCAATCTTAAATGATAATTGTTAACTTTGATGAAAAACGAGTACAGGATGAGAAGGGAAGTAAAGGTGATAGTAAGATCAACGAATTTGTGTATCAAGTGTCACCCAAATGAACAGAATTTTTAACTATAAAAGTACA…	0.344581	978
AQP12A	FALSE	FALSE	FALSE	TRUE	GTGGCCTTGCTCTGTGTGAGCCCCGTGCGAGGGCCCTGCTTGTAGCTGGACCCTGGAACCTTCTGTAGCTAAGAGGGAATCCTGGCCCCCTCCCCAGAAGCCATTTGTCAATAAACCATTTCTAAGA	0.559055	127
AQP12B	FALSE	FALSE	FALSE	TRUE	CCTGCACCTGCTGCAGAGCCTCATGGCCCAGAGCTGCAGCTCGGCCCTGCGCACATCCGTGCCCCACGGGGCGCTTGTGGAGGCCGCCTGCGCCTTTTGTTTCCATCTGACCCTCCTGCACCTGCGGCACAGTCCTCCCGCCTACAGCGGGCCCGCTGTGGCTCTGTTGGTCACCGTCACGGCCTACACGGCCGGGCCCTTCACGTCTGCCTTCTTCAACCCTGCCCTGGCCGCCTCTGTGACCTTTGCCTGCTCGGGACACACCTTACTGGAGTACGTGCAGGTGTACTGGCTGGGCCCTCTGACAGAGGAGCAGCATGGGGAGGTCATGGAGCCCCCTCTTGGACCTAGATCTGGGGATTCTGGCCCCTGGCTTCAGAGGCCCAGGTGGAGCCCACA…	0.608233	2818
AQP2	FALSE	TRUE	FALSE	TRUE	GGGCCGCCAGCGGCCTCTACGGCCCCGACGGACGCTTGTGAGGCCCGAGGCAGAAGGGCCCACCCCGTCCCTCCTCTCCCGCAGGTCTGAAGTTGGCCCCCCAGCGCAGAGTAGCTGCTTCCTGGACGTGCGCGCCCAGGCCAGTGCTGTGAGCAGGCGGGGAGGAGGCTGCCGGAGGGAGCCCTGAGCCTGGCAGGTCCCCTGCCCTGAGGCTGTGAGCAGCTAGTGGTGGCTTCTCCAGCCTTTTTCAGGGAACTGGGAACTTAGGGGACTGAGCTGGGGAGGGAGGCAGGTGGGTGGTAAGAGGGAAACTCTGGAGAGCCTGCACCCAGGTACTGAGTGGGGAGTGTACAGACCCCTGCCTTGGGGGTTCCGGGAATGATGCAACTGGTTTTACTA…	0.532844	3273
AQP3	FALSE	FALSE	FALSE	TRUE	GTGGGCAGGGGCCATCTCCCCACTCCGCTGCCCTGGCCTTGAGCATCCACTGACTGTCCAAGGGCCACTCCCAAGAAGCCCCCTTCACGATCCACCCTTTCAGGCTAAGGAGCTCCCTATCTACCCTCACCCCACGAGACAGCCCCTTCAGGATTTCCACTGGACCTTGCCCAAATAGCACCTTAGGCCACTGCCCCTAAGCTGGGGTGGAACCGGAATTTGGGTCAATACATCCTTTTGTCTCCCAAGGGAAGAGAATGGGCAGCAGGTATGTGTGTGTGTGCATGTGTGTGCATGTGTGTGCATGTGTGTGCAGGGGTGTGTGTGTGTGGGGGGGGTTCCCAGATATTCAGGGCAAGGGACCAGTCGGAAGGGATTCTGGCTATTGGGGGAGCCCAG…	0.502812	889
AQP4	FALSE	FALSE	FALSE	TRUE	CTAGAAGATCGCACTGAAAGCAGACAAGACTCCTTAGAACTGTCCTCAGATTTCCTTCCACCCATTAAGGAAACAGATTTGTTATAAATTAGAAATGTGCAGGTTTGTTGTTTCATGTCATATTACTCAGTCTAAACAATAAATATTTCATAATTTACAAAGGAGGAACGGAAGAAACCTATTGTGAATTCCAAATCTAAAAAAAGAAATATTTTTAAAATGTTCTTAAGCAAATATATACCTATTTTATCTAGTTACCTTTCATTAACAACCAATTTTAACCGTGTGTCAAGATTTGGTTAAGTCTTGCCTGACAGAACTCAAAGACACGTCTATCAGCTTATTCCTTCTCTACTGGAATATTGGTATAGTCAATTCTTATTTGAATATTTATTCTAT…	0.347711	4173
AQP5	FALSE	FALSE	FALSE	TRUE	CCAGTGTCAGGCAGGGGCCAGCCCCTCAGCCCCTGAGCCAAGGGGGAAAAGAAGAAAAAGTACCTAACACAAGCTTCCTTTTTGCACAACCGGTCCTCTTGGCTGAGGAGGAGGAGCTGGTCACCCTGGCTGCACAGTTAGAGAGGGGAGAAGGAACCCATGATGGGACTCCTGGGGTAGGGGCCAGGGGCTGGGGTCTGCTGGGGACAGGTCTCTCTGGGACAGACCTCAGAGATTGTGAATGCAGTGCCAAGCTCACAGGCTGCAAGGGCCAGGCCAGAAAAGGGCGGGCCTGCAGCCTGCACCCCCCACCTTCCCCAACCCTTCCTCAAGAGCTGAAGGGATCCCAGCCCCTAGGTGGGCAGAGGCAGACCCTCCCCAGAGCTCCTTAGGAAGAAG…	0.583333	504
AQP6	FALSE	FALSE	FALSE	TRUE	AACAGCCTACGCCTGGCCGCGCCCTTGGGCTTCCTGCCTTGCAGGACCTGCCTGGAGGTTCTCCCTGGCATTACGTTTCTAGGTAGAATCTGGGAGTGAATTTGTCCCATTCCCTCTCTGTAGGGCTTCCCCACCTCTCGGTGGGACAGAGCAGAGGAAGGCAGGGGATTTAGGATCGCCCTCCCATCCTCTCACCCACTGGACCCCGTAGGAGTCCTGACCCCAGATGCCCAAGTCTTGGGGGAGAAAGGAATGGGAGCCCAGACAGCCACTCTGCTTAGACATGGGAGCTATAGGGACCTCAGGGAGCCCCAGCTTCTTACCCACCCAGGAAACCCTTGGTCCAGAGAGGACAGGCTTTCTGGAGGAATCAGGCCCTGGGACAGCCTCTGAGCTCCT…	0.530086	1396
AQP7	FALSE	FALSE	FALSE	TRUE	GCAGAGATTATTTGTGATCCCATCCATTCCCCAATAAAGCAAGGCTTGTCCGACAGCAGTACCCCCACTTCCTGGGGGCCTCCTGTGGTTGGGCTTCCCTCCTGGGTTCTTACAGGAGCTCCAGGGCTATGTCTTAGCCCAAGGTGTAGAGGTGAGGCACCTCAAGTCTTTCATGCCCTGGGAACTGGGGTGCCCCAGGGGGAGAATGGGGAAGAGATGACCTGCGCCCTCAGTAGGAACAGGGTGAGATGAAAGAACGACAGAATGAGGGATTTTCAGGCACGGGGGAAGGAAGGGTGGTTTTGGGGAACAGACCGTAGCTGACTGGTTGGGGGCCGGCTTTGGAAATACTTTGAGGGGATCCTGAGATTGGACTCTAGACTCTCCCCTGGTTCTTCC…	0.510405	1826
AQP8	FALSE	FALSE	FALSE	TRUE	AGCAGAGCTCGTGGGATTCCTGCTGCTCCAGGTGTCCTCAGCTCACCTGTCCCAGACTGAGGACAGGGGAGTTCCTGCATTTCCTGCCAGGGCAGAGGCCCAGAGGAGCGACCCCCTGCTTCCACTGCTTGGGCCTGCTTTCTCAGATAGACTGACTGCTGAGGAGGCTCTAGGTTCTTGGAATTCCTTTGTGCTCATCAGAGACCCCAGCCTGGGGAACACGCTGCCCGCACTGCCCAGAGAGCAGTGCAAACACCACAACACGAGCGTGTTTCTTGAGAGGAATGTCCCCGAGTTGGACAAGGAGGCTGTTTCTGCACATCAGCTCATTTCCCGCACCCCATTTCTTGCTTGATTGCTTTGTTGGGGGCCTGGCCACTTCCTTGCTTCTCAAGCTGA…	0.553571	448
AQP9	FALSE	FALSE	FALSE	TRUE	TGGCATGCTCAGCTCTGGATTTGCAGTCAGTTTGGGATTCTCTTCAGAAAGATGGCATCTAAGTGTCTGTGTTCTTGTAAGCCTGAGGTGGAATCCACCCAGTTTTGTCTGCTAGCCATATGGGACATCTAATTGGAAAAGCATCTGCATAAAAGTTTGGAAACAATGACCACTTCTCTACCATTGTCCCCCACCCCCACCCCCCAGAATAACGCTGACTGTCCCCTGAAACAGCCTTCTCTCCTGCCCTGTTTATTTCATCCTCGATGGGAATTCTTGCTAGGTAAGCACTAATAACTCGGCATCTTGACGATAGTCCCATTTGGGTGGTTTCAGCTGCACTATCTGTATGAAATGGTGTCACCAAAACCCTTTTCTTCAGTATCGACAAAGATTACA…	0.404842	1776
AQR	FALSE	FALSE	TRUE	FALSE	CCAAACTGTAGTCCTTCTAAAGGAGGACATGGCAGTCAAAAAGTCTGAGTAAAGCTGTTTTTTGTATTTTATATTTGCTTCTGCCATTTTACTGTCACTAATTAATGTTTAGTTCTTATATTTGTTAACTGATTTCGGTGTCTTGAATATATTTTTTTAAATTATGTGTATGAACAATTCTAGTTTCATTTGTTCAATCAGAAGAGCAAATAACCATTCCTTTCATGTTTTGATCACTGAGTGTGTCTGTAATCATACCTACATTAAAATCATTTTCTATGAATATATAATATATACTTCACATTTTTAGTGAACTTCTCTAAAGAAGAGGACAGAATATACTGGACTTAACCACGAATACCCTTGAGTGTCCAAATTGGGAAGGAACTTGTTTCTTCT…	0.37984	5010
AR	TRUE	FALSE	FALSE	TRUE	CCTGCTAATCAAGTCACACATGGTGAGCGTGGACTTTCCGGAAATGATGGCAGAGATCATCTCTGTGCAAGTGCCCAAGATCCTTTCTGGGAAAGTCAAGCCCATCTATTTCCACACCCAGTGAAGCATTGGAAACCCTATTTCCCCACCCCAGCTCATGCCCCCTTTCAGATGTCTTCTGCCTGTTATAACTCTGCACTACTCCTCTGCAGTGCCTTGGGGAATTTCCTCTATTGATGTACAGTCTGTCATGAACATGTTCCTGAATTCTATTTGCTGGGCTTTTTTTTTCTCTTTCTCTCCTTTCTTTTTCTTCTTCCCTCCCTATCTAACCCTCCCATGGCACCTTCAGACTTTGCTTCCCATTGTGGCTCCTATCTGTGTTTTGAATGGTGTTGT…	0.422547	6901
ARAF	FALSE	FALSE	FALSE	TRUE	GGATGCCTTAGCTGAAGAGCTGCTGGGGGAGAAAAAGATCTTGGGGCTCTTGTAGACCACGAGCCATACTTTATTCATTTGTTTACTTGACAAACATTTATTGAGCACCTACAAGTGTGAGTAAGGGCATGAAACTGGGACCTTGGGCAAGTCACCTCATTTCTCTGGGCCTCAGTTTTCTCATCTGTAAAGAGGGGATGATGATACTTTCTACCATATAAAGGTTCTGGTGAGGCTTAAATGAGTTAAGACATGTTCAGTGCCTAGAACAGGATCTGGTACAGTGTAAATAATCAATTTTTTTGTTATTAATTATAAATATATTTATAAGCATCTAACTACTTTGCTAATTCTAGTATAATCATACTCAAGCCTTTCCATTTTGAAATACGTATTATT…	0.299517	621
ARAP1	FALSE	FALSE	FALSE	TRUE	GCACAGGAGCCCATCCTTGGCTCTAGGATTCCGCCGCTGGAAGCCTTCTGTTCAGACACCCCTTATGCTCCAAGGCCTGATGTGAGCCAGCGGGGGGTGCATGGGAAACTGCACCCCACAACCCACATCCTCCATCCTGACTGCAGCATGGGGTTCCCCGGCAGGGGTGGGAGGCAGCAGGGGTCAGCCTGGGCAGGAACCTCTCCCAACTCTGTCCAGGTGTTCAGACCTCTTGGCCCAACCTGCTCACCCCACCGGGTTCACTGTCCTTGTGGGGCTGGAGAGATGGGCATAAGTCAGGAACTTGGGAGGACCACCACCCTTTCAGAGGCGTGAGGCCCTGGGGCCCTGCCGGAAGGGAGCCCCCTGCTCCTCCCAACAAACTCCAGAACAGCAGAA…	0.591597	595
ARAP2	FALSE	FALSE	FALSE	TRUE	GAAATAAAATGAATTGCTCCCCAGATTATTTTTTTAATATTGTATGCAATCTTTATGTGTAACTCCAAAACTGAACTATAAGATAATTCATAAGAATTTGCCTATTGATAGGCAAATTTGTCTATGCTTAGGCATTTAAGGAGCATTTAAAAATATGTATATATGTGACTGAATGTAAGATTAACTTTATTTTGGTCTGAACAAACCTTGTAAAGTTCCATTGTATTAACGTGTGTAAGAAGACATTGGGTTACTTAGGTGGTCAGTCCTTTTAAAGTAGTTGTCTGTTAAGTGGTATAATTTATGAGCAGAAATCTCAAACTGTACTGTATTGTATAAAATGCTGTGTTTAAATGAAGCCTAAGAAACTATCTGTAACATATTTTGCACTTTGAGAAA…	0.323206	1909
ARAP3	FALSE	FALSE	FALSE	TRUE	CCCTAGGACCAGCAGTCTGAGAGGGTAGGTACCAGAAGACCCAGAAACTCTTATCGTGGCACTGTTGCAGCTTCCTCTGCCCTGGCTGGAAAGACTCCAGAATCCAGTGTGGTGCTGTGGAAGGAGCACTGGACTAAAGGCTTCAGTGGCTGCGTGTCCCAGGACAGGTCATGGCCCCTCTCTGGGCCCAGCCCATTTATCTATACCATGAGGTAACTGAAGTAAGGAGAGCAGTGAATGTCAAACTGTGTTTCTTAGAGCCATAAGCCCCACATATTATCCCTGAACAAGGGCAGCTCCTGCTTTATATATTTGATACGTAGGGGTTCCATGAGAGATTTTGGGTTTTAAAGGAATGGTTTTACTGCATTAAAGAAAAAAAATGCTTTGGAAACCAGA…	0.482696	549
ARC	FALSE	FALSE	TRUE	FALSE	AGGGCATCCCGGAGCCCCCAGCCTGCCCACTACATCCAGCCTGTGGCTTTGCCCACCAGGACTTTTGAGCTGGGGCTGACTCCTGCAGGGGAAGCCCTGGTCCAGCTGGGTGCCCCCTCGAGCTCCGGGCGGACTCGCACACACTCGTGTCATCCAGATGTGAGCACCGCACCCAGCGGCAAAGAGCCCTCCCCCCTGCAGGGCTCCACCCATCACCCTCCCTCCGTCTGTCTTTCCGGCCTGGACCCCACCCTCCACACTCTCAGGCCATCACAGAACACCCCAGCTTCCTCATTCTGCTACAACACCCAGGCCCTCTGGACATCCAGAAAACCAAGTGTCCGGATGGCAGGGGCCAGCGGCCACCAAGCTCATGGGACACCCAGAGCAGAAGCTAGG…	0.638175	1556
ARCN1	TRUE	FALSE	TRUE	FALSE	TACCAAGAAGAGGGAGCTGAAAAGGAAAATTTTCAGATTAATAAAGAAGACGCCAATGATGGCTGAAGAGTTTTTCCCAGATTTACAAGCCACTGGAGACCCCTTTTTTCTGATACAATGCACGATTCTCTGCGCGCAAGGACCCTCGACTCACCCCCATGTTTCAGTGTCACAGAGACATTCTTTGATAAGGAAATGGCACAAACATAAAGGGAAAGGCTGCTAATTTTCTTTGGCAGATTGTATTGGCCAGCAGGAAAGCAAGCTCTCCAGAGAATGCCCCCAGTTAAATACCTCCTCTACCTTTACCTAAGTTGCTCCTTTATTTTTATTTTATTATTATTATTATTATTATTATTATTTTTTGAGATGGAGTCTCACTTTGTAACCCAGGCTGGA…	0.416893	2214
AREG	FALSE	FALSE	FALSE	TRUE	CTGAAGATAAAATTACAGGATATCACATTGGAGTCACTGCCAAGTCATAGCCATAAATGATGAGTCGGTCCTCTTTCCAGTGGATCATAAGACAATGGACCCTTTTTGTTATGATGGTTTTAAACTTTCAATTGTCACTTTTTATGCTATTTCTGTATATAAAGGTGCACGAAGGTAAAAAGTATTTTTTCAAGTTGTAAATAATTTATTTAATATTTAATGGAAGTGTATTTATTTTACAGCTCATTAAACTTTTTTAACCAAACAGA	0.301115	269
AREL1	TRUE	FALSE	FALSE	TRUE	TCGCCCCGCTCATCTGCGCCTGAAAATGTATGAGTTTGCGGGACGGCTCGTGGGCAAGTGTCTCTATGAGTCCTCTCTAGGAGGAGCCTACAAGCAGTTGGTCCGAGCTCGCTTCACCCGCTCTTTCCTGGCCCAAATCATAGGACTGCGTATGCATTACAAGTACTTTGAAACAGATGACCCAGAATTCTACAAATCTAAAGTTTGTTTTATCCTCAACAATGACATGAGTGAGATGGAGCTGGTCTTTGCAGAAGAGAAATATAATAAATCAGGTCAATTGGATAAGGTTGTAGAACTCATGACAGGTGGAGCTCAAACTCCAGTCACCAATGCGAATAAAATCTTCTATTTAAATTTGCTGGCCCAATATCGGCTGGCCAGTCAAGTGAAAGAGGA…	0.475569	3295
ARF1	TRUE	FALSE	TRUE	FALSE	ACGCGACCCCCCTCCCTCTCACTCCTCTTGCCCTCTGCTTTACTCTCATGTGGCAAACGTGCGGCTCGTGGTGTGAGTGCCAGAAGCTGCCTCCGTGGTTTGGTCACCGTGTGCATCGCACCGTGCTGTAAATGTGGCAGACGCAGCCTGCGGCCAGGCTTTTTATTTAATGTAAATAGTTTTTGTTTCCAATGAGGCAGTTTCTGGTACTCCTATGCAATATTACTCAGCTTTTTTTATTGTAAAAAGAAAAATCAACTCACTGTTCAGTGCTGAGAGGGGATGTAGGCCCATGGGCACCTGGCCTCCAGGAGTCGCTGTGTTGGGAGAGCCGGCCACGCCCTTGGCTTTAGAGCTGTGTTGAAATCCATTTTGGTGGTTGGTTTTTAACCCAAACTC…	0.517932	1199
ARF3	FALSE	FALSE	TRUE	FALSE	AAGCCAGACAGCCCTAACAAAGCACCCCACCCACCCCTGACATACCTACTGTCACCCTGCCCCAGTCCTACCCCTTCCTCTCCATGCAAGTGTGGCCAGGGCCCTGGGTATCATGTCCACATGCCCAGCAAGAGCCTTGCCTCCCCTGCCTCCCCTCCTTTTTCCTGTCCACCTATATGACCAATCCCTAATTGCTGTCCTGATGATGAGTCATTCCAATTTACTGGATTTAAAACAAAAAGTTGTTACGGTTTCATGGGGTGGCCCCTCTCTCTCTCACCCTCTGGGTTTCGGGAGGTCGAGTGGGGTATTCTCTTTGTTTGGCAGTGGTTGCTGTCCTCTTGGCATCTGAGTCCTTTCCCTGTCCCCACAAGCCCTTCTACTCCCTGTTTGCCTTTC…	0.508065	3224
ARF4	TRUE	FALSE	FALSE	TRUE	TGTGGAAACAGTAGAATATAAGAACATTTGTTTCACAGTATGGGATGTTGGTGGTCAAGATAGAATTAGGCCTCTCTGGAAGCATTACTTCCAGAATACCCAGGGTCTTATTTTTGTGGTAGATAGCAACGATCGTGAAAGAATTCAGGAAGTAGCAGATGAGCTGCAGAAAATGCTTCTGGTAGATGAATTGAGAGATGCAGTGCTGCTACTTTTTGCAAACAAACAGGATTTGCCAAATGCTATGGCCATCAGTGAAATGACAGATAAACTAGGGCTTCAGTCTCTTCGTAACAGAACATGGTATGTTCAAGCCACTTGTGCAACACAAGGAACTGGTCTGTATGAAGGACTTGACTGGCTGTCAAATGAGCTTTCAAAACGTTAAATGAAATTGGA…	0.362343	1195
ARF5	TRUE	FALSE	FALSE	TRUE	CCAGCCAGGGGCAGGCCCCTGATGCCCGGAAGCTCCTGCGTGCATCCCCGGGATGACCAGACTCCCGGACTCCTCAGGCAGTGCCCTTTCCTCCCACTTTTCCTCCCCCATAGCCACAGGCCTCTGCTCCTGCTCCTGCCTGCATGTTCTCTCTGTTGTTGGAGCCTGGAGCCTTGCTCTCTGGGCACAGAGGGGTCCACTCTCCTGCCTGCTGGGACCTATGGAAGGGGCTTCCTGGCCAAGGCCCCCTCTTCCAGAGGAGGAGCAGGGATCTGGGTTTCCTTTTTTTTTTCTGTTTTGGGTGTACTCTAGGGGCCAGGTTGGGAGGGGGAAGGTGAGGGCTTCGGGTGGTGCTATAATGTGGCACTGGATCTTGAGTAATAAATTTGCTGTGGTTTG…	0.591133	406
ARF6	TRUE	FALSE	FALSE	TRUE	TGAGCATTCTCCACCCATCCCCTGGAAGGAGAGAAATCAAAAACCCATTCATAGGATTATCGCCACCATCACCTCTTTCAATTGCCACTTTCTCTTCTTTTGAATTTGAACTCTGGAGTTACTGTTCTACAGTTTGGCGGGGACGGGGCTTGGGGGTTTTCTCTTTTGTTTGTTTCCCTTTCTTTTTCCTTTTTTTTTTTTTTTTTTTTTTGTTGGCTTTGCGTTAGGATGCTCTGATCTGACATTTGACATGAACACAAAGTTGCTAGATGCTCTTGTTGACTTCCAGCAGATGGGATGGGGGAAACACAGCAGTTCTTGGTAAAGTCCTTTGTAATAATAGTTTGATTTTTTTATTTCGAGAGAATCTTTCATTTTCCTATGTATGCTTTTTTCCTT…	0.33871	2790
ARFGAP1	FALSE	FALSE	FALSE	TRUE	ACCAGAGCTTCTGGGAGACCTTTGGAAGTGCTGAGCCCACCAAGACCCGCAAGTCCCCGAGCAGCGACAGCTGGACGTGCGCGGACACCTCCACCGAGAGGAGGAGCTCGGACAGCTGGGAGGTGTGGGGCTCGGCCTCCACCAACAGGAACAGCAACAGCGACGGCGGGGAGGGCGGGGAGGGCACCAAGAAGGCAGTGCCGCCGGCCGTGCCCACTGATGATGGCTGGGACAACCAGAACTGGTAGGGCCCACTGCGCCCCCGTCCCCAGCGCCCCCGGGCGACTTCGTGTTTGCACTCTGCCCTCGTCGTTCCTCCTCCTTCCATTTGACCCAAGAATCAGCAACTGCAGTGTGAGGACAGCGTCTCGGGAGGCAGGACCCTAGGGAGACCCGGGT…	0.638927	2163
ARFGAP2	FALSE	FALSE	FALSE	TRUE	TCCGAGCTCTGTGACTCAGGCTTACGATGGTGACGGCAACAAGAACTCCACAGTTCCCAGGCTGGGGATGCTTTGCCTTGTGGAAGCTGGGGAGGATTTGTTACTTCGTATGTGTGGTGTGTGTGTGGGGTGGCCTTTGAGGCGCTCACTCCTGTGAGGGGAATGGTCAGTACCAGCCCTTGTCCTCTGCCTGTGGACTGAGCCCTTTATTCCCTCTCACACCACCCTCCGTGTGTTAGACTCTTGTCCTTCTGTCCTGCCCCCACAGCTGCTGCTCACTTATCCTGCCATACTGGGAAAGGGGGTTCCCCCACGATGGCTTATTCTGGGTCCAGACTTTCCCCAGGTAGGGAAAGCGGAAGGTAGAAGGCTTTTTTTGCTGGCTCTAGGGTTCTTCTA…	0.568047	1183
ARFGAP3	FALSE	FALSE	FALSE	TRUE	TACTGAAGTCATGATGTGTATTTCCTGGAGAAATTCCTCTTTAAATGAACAAGTAACCACATCTCAGGCGGCAGTGAAGTCCAGATAGTTTTGCAGATTGTTTTGCTACTTTTTCATATGGTATATGTTTCTGATTTTTAATATTTCTTTTGAGAAATTCTGAGTTCTGATGTAGGAGCTTTCCTGTGATTTCTGTTTCACGTTCCTTCCTGTCACACCCTCCTTTGGCGTCTCTGTGTATATCCTTGCTTTATTTTCTTGGAACCTTTGATTTCAACACTGAGGGCCTGGAGACCTCGGCTCCTCCTGCTCCTGAACCAGGAGGCTTCATGTGGGGGAGGAGGAGAGGTCTCCATGTGACACATGGGCTCAGGGCTGCCAGAATCAGCGGATGCTGGA…	0.367403	1086
ARFGEF1	TRUE	FALSE	FALSE	TRUE	GCATGGGGCTGCCAGTGAAAGGAGGATGCCTGGGAATGAAATCAATAGAAGAGATGCAGAAAGCCTACGGAAAAACAGCGTGCTGATACTATTTGACACAGCAATGATTATTTCTTACCTTTGGCACCTTCCTGCATTTTTATTCTGTTCAGCCTCTTCTGCTGCTCTCTTAGCAGGGCTTGCTGCTGAATCTCTAAGGTGTGATGATCTCTTGGAGGATCCAGGTACATAAATTTCAGATCAACTCGTGTTTCTGAATCTGGTATAAAAAATATGTTATATAACTAAGTTAAATGTTGTTTTCAAATGGGATTTTGTAAAACTTCACTGTAAGTAACATGAGTAACCTAATTTCAAAATCAAGGAAATGATAGAAATAGTGAAACATCACTAAAGTCA…	0.369374	2044
ARFGEF2	TRUE	FALSE	FALSE	TRUE	CCCTGGCTGCCCAGGCCAGTGCTGCAGCTCTGCAGAATGTTCAGCATGCCATTTCTGACTGGCACATCTCGTGAAGTTTCATAGAAACAAGGAGTTGGCATCTTGGATCTCAGAATGGCCTGGAAACGGATGGCCTCTACGCTGTTCCATCACAGTCTCCAACTAAGGCTTATGGTATTTCATTAAACTGTTGCATACCCAGTTAGCACAGTAGGTGGGGAGTCTGCTTCATTTCTATCATTCCATTTTTCTGATTAAACTGTCAAATCTGTCATTGCATATGCCATCGTTTTCTAGCAAAATCCCATGATTGGCTATAAACGTTTTGTAAGAAGTCACTCTCCTTGAAAATACTGAACATAGCTGTATAGGTTTGTGATTATTAGAGAATATGTTAAT…	0.364625	3494
ARFIP1	TRUE	FALSE	FALSE	TRUE	AATCACAGCGGAAAATAAAAAGAAAGTCGCGTTGTTATATTTCTAAACCAACCTAACAAGAATTAAGCAGAGTTGGGGGAAGTGGGAGGGGTGACAAGCATTATAGTGATTCTTGCACAAACAGCTTTAATTTTTCCCTTTTTCATACTTTAACAATTGAACTGTTAAGGGTGGTTTTAATGTAAACATAGTTTCTATAATCTGAACACAATAATTTTCCTTTTTGAGAAATCCTTTTGTATTGTGAGGGTTGATGGCTATTTCTGTAGTTTGAAAACATCTAATAGAGATTTGCACTGACAAGATAAAAATTCAAGGTTTTTGGTCCTGGAAATGAGGGCCGATTGTAACTTTTCCAAAGGGAGGTTTACATGATTTGTATCAACATCAGATATTTTA…	0.328812	2138
ARFIP2	FALSE	FALSE	FALSE	TRUE	GCTGCTCCCAGCCCAACTTGGCTATCAAGAAAGACATTGGGAAGGGCAGCCCCAGGGTGTGGGAGATTGGACATGGTACATCCTTTGTCACTTGCCCTCTGGCTTGGGCTCCTTTTTCTGGCTGGGGCCTGACACCAGTTTTGCCCACATTGCTATGGTGGGAAGAGGGCCTGGAGGCCCAGAAGTTGCTGCCCTGTCTATCTTCCTGGCCACAGGGCTTCATTCCCAGATCTTTTCCTTCCACTTCACAGCCAACGGCTATGACAAAACCACTCCCTGGCCAATGGCATCACTCTTCAGGCTGGGGTGTGCTCCCTGACCAATGACAGAGCCTGAAAATGCCCTGTCAGCCAATGGCAGCTCTTCTCGGACTCCCCTGGGCCAATGATGTTGCGTCTA…	0.511934	2430
ARFRP1	FALSE	FALSE	FALSE	TRUE	CATCAAGACGGCCTTCAGCGACTGCACCAGCAAGATCGGCAGGCGAGATTGCCTGACCCAGGCCTGCTCGGCCCTCACAGGGTGAGTGGGGGCTGCACCTGCGGGGGCTTTGGGGACCGAGACCCCCCGCCTCACACCCGCTGTCTTCACAGCAAAGGGGTGCGCGAGGGCATCGAGTGGATGGTGAAGTGTGTCGTGCGGAATGTGCACCGGCCGCCGCGGCAGAGGGACATCACGTAGGCGCAGCCGCGCTGCCGTCGGGACGGCTGGTCCCCTGGTGCTGGAGGAGTGGCCTCCTGTTGGCTCCCATGCTGCTGATCTGGGGGGTGGGTTTGCTTTGCTTTGGGGTTCTTCTATTTACTTTGTTTTCTCGAAGACAAACTTTCCTCTATGTCTGGA…	0.645098	2040
ARG1	FALSE	FALSE	FALSE	TRUE	ATGTGGAAACATCCGATATAAATCTCATAGTTAATGGCATAATTAGAAAGCTAATCATTTTCTTAAGCATAGAGTTATCCTTCTAAAGACTTGTTCTTTCAGAAAAATGTTTTTCCAATTAGTATAAACTCTACAAATTCCCTCTTGGTGTAAAATTCAAGATGTGGAAATTCTAACTTTTTTGAAATTTAAAAGCTTATATTTTCTAACTTGGCAAAAGACTTATCCTTAGAAAGAGAAGTGTACATTGATTTCCAATTAAAAATTTGCTGGCATTAAAAATAAGCACACTTACATAAGCCCCCATACATAGAGTGGGACTCTTGGAATCAGGAGACAAAGCTACCACATGTGGAAAGGTACTATGTGTCCATGTCATTCAAAAAATGTGATTTTTTA…	0.301887	424
ARG2	TRUE	FALSE	FALSE	TRUE	GAGACACTGTGCACTGACATGTTTCACAACAGGCATTCCAGAATTATGAGGCATTGAGGGGATAGATGAATACTAAATGGTTGTCTGGGTCAATACTGCCTTAATGAGAACATTTACACATTCTCACAATTGTAAAGTTTCCCCTCTATTTTGGTGACCAATACTACTGTAAATGTATTTGGTTTTTTGCAGTTCACAGGGTATTAATATGCTACAGTACTATGTAAATTTAAAGAAGTCATAAACAGCATTTATTACCTTGGTATATCATACTGGTCTTGTTGCTGTTGTTCCTTCACATTTAAGTGGTTTTTCATCTTTCCTCCCTCCTCCCACAGCCTGGCTATACAGTGCATCCTTGAACTGTCAGCCCACAGCAGCAATATGCTTATTCTATCC…	0.4075	800
ARGFX	FALSE	FALSE	FALSE	TRUE	CCAGAGTACTAATAAATATAGATCATTTAGAAAA	0.235294	34
ARGLU1	TRUE	FALSE	TRUE	FALSE	ATTGCAAACTCTGAACTTTTTACAAAGAAAAATGGAAAAACTTTGTATGGTAGCTTCATGTTGAAGTGGTTTTTTGTTTTTGTTTTTGTTTTTTTAATTTGTAAAATCTGGAAAGTTAGCTTGTTCTAATAGGGGCTATGCTCTGCAATTCCCTTTTTTTTTTTTTTTTTCCTTCCACTAAGTCAAATCCTTATCAGATCATTGTTGTATTCTAAGGAGTGACGTATTTTTCACCTGTTTGGATTCTATATTAGTGGTCTGAGGAAGAGCAGATCACATTGTAAAACTATGGATGGTCTGATAAGGCTTTTACTGACCCCACTGACTTCAGAGTTATACTCTGTTTGCTACATCATAATGCTGGTTTTGCTGACTTTTTGTTTTTTTATATATTTATAA…	0.299613	2323
ARHGAP1	FALSE	TRUE	FALSE	TRUE	ACCTGGCCCCTGCCCCACCAGCCCCTTCTCTGGTAGCCCGGGTTTGGACTCTTCCTCCTGGCATCAGGGGCCATGAAGCCCCCTGGAGAGAGATGTTGGAGCCACCCATCAGGCATGCTCTCCCCCACCTCTGTCCAGCCCGCCTCACGGCCCTGGCGGCCTCGCTGTTACCAGAAGACGTTTTTCTCTGCCTTACACTTCTCACTGCCTCTCTGGACACCGGGCTTTTGCTGGGCTCTCCAGAGCTGGGCTTGGCTCTTCCAGCTGGAGAAGGACTGAGCCCCAGTAACCCCTTTCCTGCTTTTTCCTGCCTCTGTTTCCCTAGCAAGTGTGGATGAATCAAATGACTGCCGGCTGGGCTGGTAGCAGGGGCCAGTCCTCCCCTCTTGATTGCTGGGA…	0.573838	1957
ARHGAP10	FALSE	FALSE	FALSE	TRUE	CTCCTGGCCTCAGAGCCCCTGCTGACCCTGGCACCCAGGGACCTGCCTGGGGGCAGAGAGCTGTCTTCCTCCTCCGAGGCTCTGGGCTGCACCCACAGGTACCTCCACACTTGGGAGTTACCATCATCACAGTCAGCCCTGGGGGTGGGGGGTGGTGGGCAGGGATGGGACGCACCACACAGAACTGTGATTGTGGATCAGGAGGGGAATGTCAGGATTCGCAAAATGGACTTTTCATTTGTCAAGTATTGGGACTTGTGATTTTTAATTATCCAGCATATAGAATGAGAGGGAGGGCAGCCTTCTGCCACCTGTGTCGCCTCCACTGGCAGTCACGCCACCAGAGCCACCCTGGCTCCCTCTCCTCCCTGAGCACCTGCTGCTGCGATTTTAAAGGGA…	0.555079	699
ARHGAP11A	FALSE	FALSE	FALSE	TRUE	TTGGTAAATGTTATACTTGTCATTAATGTAAATAAAGTGAGTAATTGGTATGACTTGCAGGATGATGTACATGTTAGTTTGTAGCTCAGGATGATTGTTAAGCAATAGATTTGCTCTATTGAAAATGTTTCATTTTTTTCACTGTACAAGCAACTTAGATTTTTATTTGTACAAATTACTTCTTTGTTTTTCTTAATGATGGCAATTTTTAAACTTTAATTTTATTGTGATCTCTTAAAGCAGAGGTTAGACTTTACCTTTCTGACTCTGTCGTCCAGGCTGGAGTGCAGTGGCGCAATCTCACTGCAAGCTCCACTTCCTGGGTTCATGCCATTTTCCTGCCTCAGCCTCCCGAGTAGCTGGGACTACAGGTGCCCGCCACCACGCCCAGCTAATTTT…	0.338403	2104
ARHGAP12	FALSE	FALSE	FALSE	TRUE	TTCTTACTGAAGACAACCTGTGGAATAGAAGCTGGATTCCATCAGATTTCAAATGTTTATACACAATGTATTTTATTTTTTGGACCAAGCAGTGACTCTTTGATTTTGCACTTTTTTTTTGAGGGATCAGAAGGGAAGGGGAGAGTCGAGATGTGTGTTAGGCCCTCATATTTGCTGCTTTGTTGCAAGTTGATATAACTGCGTGTAATTATGAATTCATTTTATCCTGAATGTTTGCATTTCATACTCTGAATTTCAGTAAAAATCAAAACTTAAAATTCTAACCAGTCATATACACTGGATAATTTGGTAAGAAAACTGTATTTTTTTTCCCTGAAATTGGATAATGTACTTTCTTCTCAAGATTCATGACTTGATAGAACAATACTTTCAGTTATG…	0.326531	2254
ARHGAP15	TRUE	FALSE	FALSE	TRUE	CCATGTTCATGGGATTTGGCAAATCTCCATTTTTGGTTAAACAAAACCCATTTGATGGATTGCATCATAGAGAAGAAGCTCTGCAATTTAGAACATCCATTCATTTATTCTCTCAACAGTTAACAACTCCTACCAGGTGTCATATAATTTTTTTCTTTTTGTTTTGTTTTGTTTTTACATTAGGGGCAACAGAAATATTCAAATGAATAGTATATGATCCCTGCTCTTAAAGTACTCACAATATGGTAAAAGAGACATAATTTTGTATAGGTTTATTATAATAAAACCATGACTAAAGTGTTAAAAAATATTAGACAACATGCCATGGAACCATAGATTTAGCTATAGGTAGTCTTTTTCCAGAGAAACTATTGTTGCAAGTCATGTTCAGCTTAGGTA…	0.343724	2374
ARHGAP17	FALSE	FALSE	FALSE	TRUE	CCTGCCATATTCAGTAAGAACTGAGATTGGAATATTTAATGACTCCAATTCCAGGGTTTCAGAACCGCATCGCAGCATCTTTCCTGAAATGCACTCAGACTCAGCCAGCAAAGACGTGCCTGGCCGCATCCTGCTGGATATAGACAATGATACCGAGAGCACTGCCCTGTGAAGAAAGCCCTTTCCCAGCCCTCCACCACTTCCACCCTGGCGAGTGGAGCAGGGGCAGGCGAACCTCTTTCTTTGCAGACCGAACAGTGAAAAGCTTTCAGTGGAGGACAAAGGAGGGCCTCACTGTGCGGGACCTGGCCTTCTGCACGGCCCAAGGAGAACCTGGAGGCCACCACTAAAGCTGAATGACCTGTGTCTTGAAGAAGTTGGCTTTCTTTACATGGGAAG…	0.46527	907
ARHGAP18	FALSE	FALSE	FALSE	TRUE	AAGACTTAACAAGCTGCAGATAACCATGTGGACTTCTGTCATAATTCTTGCTGAGTCAAGAGTGTAAATAAAAGAAATGGCAGGACTCATATTATTCAGTTGTACCCAAGTATTTAAAAATGACTCTCTTAAGCCTTAAAAAGTCATAGATTTGTGCTGCTGCCAGAATTATATTAATTATTATTAATGTTATTATTAGAAAAAAAATTTCTGGAGTGAGAGTAAAGAGGCTTAATTAGTTTGTGGGCAGTTTTCATATGCTCTGTGAAATGTGTCCAGATGTGACATAGTTTTTTTTTTTAATATGTGGAAATGTCTTCTCTTCCCATTCTTTTCTCCTAAAATCATATATACTGTAATATATGCTCTCTCACCTCTATTACCTCCTCACATCTACCC…	0.315414	2381
ARHGAP19	FALSE	FALSE	FALSE	TRUE	AGTCTTTTAAACAACTTGTTGACCTGGAGGTCACTGCAAATGACCTTCAGGAGAATATCACAAAGTTAAACAGTGGGATGGCTTTTATGATTAAACACTCCCAGAAACTTTTTAAGGCTCCTGCTTACATTCGGGAGTGTGCGAGATTGCACTATTTGGGATCCAGAACTCAGGCATCAAAGGATGACCTTGACCTCATAGCTTCATGTCATACTAAGTCCTTTCAGCTGGCAAAGTCTCAGAAACGGAACCGGGTAGATTCCTGCCCTCACCAGGAGGAGACCCAGCACCATACGGAAGAGGCACTGAGAGAGCTGTTTCAACACGTTCATGATATGCCAGAGTCAGCAAAGAAGAAACAACTTATTAGACAGTTTAATAAGCAATCATTGACCCAGA…	0.431971	4623
ARHGAP20	FALSE	FALSE	FALSE	TRUE	GCATAGTAAGAATCTGATGTCCACAAGAACAGGAACTGGGTTAATAATAATAGACAATAATTATTATGACCCCTTTGTATAAGATACCTGGGAGAGGTAGCATAAGGATTATCATTGCTAATACTTAGGACAACGAAATAATTCTCTTTATTGAGACTACTTGACAAATACTTTATGCTAAAAATTTTGTCACCTAAGTGTTTGGGAGGCTTTTTCTTATTAAAGGTTGGGATTGGTCCTGTCATGTGGTTTTAGAGATACTAACAGAGGGCTAGAGAAAGCATCTTCTGCAGAGGAAGCACTTATGGGAACAGTCTGTGAGATTGATGTCCTGAGAAGACCAAGATATCAGGAATGAGGAATAGGGGCCTGAGGAGAGAGGGGAAGGGTACAGAGAAA…	0.369845	2328
ARHGAP21	TRUE	FALSE	FALSE	TRUE	CACAGGCAAATCTATACTGATGTTGAACAGGCGAAGTGGGAGGAGTCTATCACACGATTCAGCTACTAGTGACTCAACAAAATCTAAGGGTTCTTGGGGATCTGGAAAGGATCAGTATAGCAGGGAACTGCTTGTGTCCTCCATCTTTGCAGCTGCTAGTCGCAAGAGGAAGAAGCCGAAAGAAAAAGCACAGCCTAGCAGCTCAGAAGATGAACTGGACAATGTATTTTTTAAGAAAGAAAATGTGGAACAGTGTCACAATGATACTAAAGAGGAGTCCAAAAAAGAAAGTGAGACACTGGGCAGAAAACAGAAGATCATCATTGCCAAAGAAAACAGCACTAGGAAAGACCCCAGCACGACAAAAGATGAAAAGATATCACTAGGAAAAGAGAGCAC…	0.430577	2564
ARHGAP22	FALSE	FALSE	FALSE	TRUE	GCAACCTTCCTCAGGCAAATTACAACCTGCTCAGATACATCTGCAAGTTTCTGGATGAAGTTCAGGCATACTCAAATGTCAACAAGATGAGTGTCCAGAATCTGGCAACCGTTTTTGGACCTAACATTCTGCGGCCACAGGTAGAGGACCCAGTAACCATCATGGAAGGCACTTCCCTCGTCCAGCACCTGATGACCGTCCTCATCCGCAAACACAGCCAGCTCTTCACGGCACCGGTCCCGGAAGGGCCCACCTCCCCGCGCGGGGGCCTGCAATGCGCAGTGGGGTGGGGCTCCGAGGAGGTCACCAGGGACAGCCAAGGAGAGCCCGGCGGCCCCGGCCTGCCCGCGCACAGGACCTCTTCCCTGGACGGGGCGGCCGTGGCGGTGCTCTCCAGAA…	0.657658	1110
ARHGAP23	FALSE	FALSE	FALSE	TRUE	TCCCCACCTCCCGCGCCGCTCGGGCGCCACCCCTCCCTAGAGCCCCTTTGGAACCAGGAGGCTTCACCAGCCTGCACCTCCTCTTCTGTGGCCCCTGGGTGCATGGTGTGGGTGGAGGGCGCAGCAGGCAGTGTCTCTAGTTGGTGTGCTGGAACTGGCAGGGCAGAGGAGAAGGCTGGGGCCGGACTAATTGAATGGAAGGGGGTTCCAGAGGTGATGAGCAGAAGAGGAGGGGGCGTGGGCTGCTGGGGTCTGTGTCCCTGCACACATGCGCCCGATAGGTCCTTCTGAGCCTTTCTGTGGCTGCACTTGGGGACCCTTGTGGACCATGGGGTGTGGCTAGGGAACCCCTAAGTTTCAGACTAAAGGAAAGATCCTGGGTGATGCTGGCTTTTTGCT…	0.545775	1420
ARHGAP24	FALSE	FALSE	FALSE	TRUE	GCCTGCTTTCGCCTGCTGTCTCTGATGGCTCTGGCAAGGACTCCAGGGATTCTGGTGGGATATGACTTAGAACCAGGTGGCTGGTCACCTGGATGTACAGAAGTCTAACTGGTGAAGGAATATCATTTACAGACATTAAACATCCATATCTGCAATGTGTACCAAAGTTATATCATGCCCCATAATGCTACTGTCAAGTGTTACAACTGGATATGTGTATATAGAGTAGTTTTTCAAAAGTAAACTAAAAATGAGAAGCATATTTCAAGAATTATTTTATTGCAAGTCTTGTATTTAAATGTTAAATCAATATGTTGTTGCAATTTAGCTTGCTTTCAAGCTTCACCCCTTGCACTTAACATAAGCTATTTTTGGCATTGTGTTATCATCGGCTTATTT…	0.376797	1948
ARHGAP25	FALSE	FALSE	FALSE	TRUE	TGGTAGTGACACTCAGTCAAGGGCTCAGAGAGAGTGGATTTGGGTTCAGGAAAACCGATTTTGGGACTCATTGATTTGTTTGTTCAGGCTGCATGTATCTACCAGGATGTACAATCAAGGAGATCGCCACAAACCCAGAAGAAGCTGGGAAGTTTGTCTTTGAAATCATTCCAGCCTCATGGGACCAGAATCGCATGGGACAGGACTCCTATGTCCTCATGGCCAGCTCTCAGGCGGAGATGGAGGAGTGGGTTAAATTCCTCAGGAGAGTTGCTGGCACACCCTGTGGAGCAGTGTTTGGCCAGCGCTTGGATGAGACTGTGGCCTATGAACAGAAATTCGGCCCCCATCTGGTGCCCATCCTGGTGGAGAAATGTGCAGAGTTCATCCTGGAGCACG…	0.529625	827
ARHGAP26	FALSE	FALSE	FALSE	TRUE	CCGTGGGCCCCAGCAGAACTGCTGAGCTTTACATGGTATCCATGACAACTGCTGATTCCAGTGTCGAGGCCATTTCTCTTTGCCACTGAGAAATGCAGCGTGACTGACTCTGTTGCTACCTGTCAACATGAATGTTTCTGTGAGCTCTGGTGTCACTCATCTCCATGATCATCTCAGCCAACATGCATCAGTACTGCAAGAAAAGAAGTCAATCAGCAGAGGAGAGCATTTGATAACTAAGAGGAAGACTTGCAAAGCCGTTTTCTCATGAGTACCCTGAATAGGGGGCACTCATTTTGTTTCAACGGTCCAAACGCCCAACCTTCAGAAAGAGGAAGTCAGATAGAAATAGTCCCTGAGAGCACACTGTGTAGCTAAGCCTGCTGGGGCTGGGTGAAG…	0.444174	6565
ARHGAP27	FALSE	FALSE	FALSE	TRUE	CTGCTGGCCTGTGACTGGGGCGGCGGCCGCGGTCCTGCCACACAAGCTGGGCGGCGGAGGCCACGCAGCCGGGCCTTCTTCTCTCTGGGACCCTCCGCCAGCGCATAGCCGCAGGCCGGTGTGACTTCTGCACCCTCGGTTCTGAGGGTACGGTGACCCCTAGTGGGCAGTTTGCAAAATGTGATTCCTTCTTCCCAACTCCCCATCCCCCCTTCCCTTCCCGTCACGTCCTGTTTGGGGGTTAATTCGGTTTTTTCTCTGTTGCATCGCGCCTACTGTGCGTGTGCGATAGCGTGTGTGGGGGTGAGAGTTTGTTTTCTGGAATGGTAGGTGCTGGGAGGAGGAGTTTGATGGAGGGCTTCCTGGCTGCTTCTGGCCCTCACCTCGTGGAGGCCTTCA…	0.568855	1554
ARHGAP28	FALSE	TRUE	FALSE	TRUE	AATATCCTCGAGAGAGCTGCTATCATGTATTATATGCCAAAAAGATCCTACATTTTGGTAGGGAAAAAACAACACTGTGTTTGACGTATTTGTTCCTACAGCATTCTCAGTATTTCTGGCCCTCAGCAGTGGGCATTGTAAGCATGAACTATGGAAGAGGCGCCGGTTCACCAATTCAACTGAAGCTTTCTCATGACTTTTTTTTTTATAAAAGTAAAGGAAAGATGATGTGGTCCTTCCAGAAGAAAGACCAATCTAGAATATGGAACTCTAATCACTTCTAGTATTTCAACTTCCTAGCAGAAATGAACTTGGCCCTAGACCTAGGGATAAGCAATGTTCTTTATGTAGCCAATGCTACGAAACAAAAGAGGTGAAAGAGACCCTTTTTTATACTTA…	0.337732	3562
ARHGAP29	TRUE	FALSE	FALSE	TRUE	GGATGTCAAATTTCAGGGTTTTTTTGTTGTTGTTGTGTTATTTTGTGGTATTGTGCTTGTTTTGTGAAAGAATGTTTTGACAGGGCCTCTTTTGTATAGGACTGCCAAATCATGGGTTTTGCCTTTTGTTGTTGTATTTATCCTCTGTTGGTAATACTGAATGGTAGAATGTTTTGATAGGGTCACATTTGTGCCTCACTGGAATTATCTTTAAATTCTGTATTTTTAAAGTTGTGAATAAGATAGGTGGATTCGTATTTTTTAAAGTTCAGTTGACTTTCCCCACCAAATGGTCCATTTGAATGCATCCCTAATATATGATATAGTCTCAACTAATAGGTGCAATTTGGGAAAATCAGGTTTATTTTTTGGAGTGGAACTGTTATAAGTGCTTATTTA…	0.312559	2118
ARHGAP30	FALSE	FALSE	FALSE	TRUE	GAGTGCAATTGGAACCTGAGCGCTTGGTCAAGATCCTAGAGGTGCTTCGGGAACTCCCTGTCCCAAACTACAGGACCCTGGAGTTCCTCATGAGGCACTTGGTACACATGGCCTCATTCAGTGCCCAGACCAACATGCATGCTCGCAACCTGGCCATCGTGTGGGCTCCCAACCTGCTGAGGTCTAAGGACATAGAGGCCTCAGGCTTCAATGGGACAGCGGCCTTCATGGAGGTGCGGGTACAATCCATCGTCGTGGAGTTCATCCTCACACACGTGGACCAGCTCTTTGGGGGTGCTGCCCTCTCTGGTGGTGAGGTGGAGAGTGGGTGGCGATCGCTTCCAGGGACCCGGGCATCAGGCAGCCCCGAGGACCTTATGCCCAGGCCACTGCCTTATC…	0.59435	1876
ARHGAP31	FALSE	FALSE	FALSE	TRUE	TTTCGGTTCACCTGCTGGTGTCTGAAAAAAACCGTGATTCATCTGGAAGTTATTACAGGGCCAGCTTGCCATATTCCAGGCACACGTTATCAAGTTTGGGCCTATTGTGGCCTCTGACTTCTCTTTCTTCAGCCTTTTGACCACTTATTAATTAGTCCATTTGCTAGAAGAGTGGTCAAGGGAAAAACGAGAGATGAAATTTAGTTAAGTCTATGTGAGCAAGTGAGAGAAGGTTAGGTAAGGGGAGAGGATGGAATGCTTGCCTCCAATGAACTTTGGAGCTTGTATGTGAGTCAGATTGCTCCCCTATTGCTATTATCTATTACTCTTGAGAGCTGGCTGTCCTTTGAAAGAAAGAAGTAATGTTCTTTGAAAGAAAGAAAAATCTCTTGCTGTGTC…	0.428764	4450
ARHGAP32	FALSE	FALSE	FALSE	TRUE	GTTAAGAGGGATCTTCAATCCTGTGTGCCATCTGTGCCTTTTAAGAGAGAAATTTGTCCACAGCTAGCCTTTAATCAAAGAGAATGCTTTTCTGGGTGGTGCTGATGGCTCAGAGCCCTAAATTAAAAGCAGTCCAACAAAACTCCCCAAAAGGGCCAATGGTCCTGCTTCAAATCTTCACAAAAGTCCCCTTATCTCTTTGGACGGTGAGAATTCGTGGATAATTTTTGCACAACTGCGTAGCTCTTGATTCTGTTTTTCTCTTCTAATAAAATATCTTTATTGTAGCCTTCCAAGTTAACAAGCCAGCTACACCATCAAATGTAAAAACTGTTCATAATAACAGTCTACAAGCACTTGAAGCTTGTTTTCTAAGCAATCTTTTCTGAGCCAGGTGAG…	0.471571	5329
ARHGAP33	FALSE	FALSE	FALSE	TRUE	GCACCAGCTGGGAGGGGCCGTCCTTCCTTCCCTTCACCCTCACTGGATCTTGGCCCAACCAAATCCCTTGTTTTGTATTTTCTTGAACCCCGACCACTACCCCAGGTTTCTAACTTTGTAACTTGCTTCTGATGTGGGTCCCTAACCTATAATCTCAGCTTCCCTACCCTGGACTGAAGGGTCTGCCCATCCCCCCACCACCCTCCATCCTGGGGGCCCTCGCACAAATCTGGGGTGGGAGGGGCTAGGCTGACCCCATCCTCCTCTCCCTCCAGGAGCCCCCAGCATGTCCTGACCTGTGCACGGGGATGGGGGGACAACTCCTACCCTTCTTTCCCCACATGCCCCACTAAACCATCTGACAACATTAATGAATAAAATGGTGAAAATGTG	0.554707	393
ARHGAP35	FALSE	FALSE	FALSE	TRUE	GCCACCAAGACCTGGGGCGACAGGAGAACCGGTCCTCTCTCTGACGGGGTGGCATTTGGCCTTGAACAAAACCAAGTCCACTGGGGACAGAGGCAGGGGCAAGTGGCTCTCCCCATTACCTTCTCAAGACCTCAGTGGGAGCACCAGCCAATGGTACCATCGGCTGGGCTGCCAGGTACCCTGGGCCTGGCGCTGCAGACCTGAGCTGGCTTGGACCCATTTGAGGACTGAACTAGGCAGGCAATGGCTCCAGTGCCCTCCCTCTGTTCCCTGGACCACCACCCCACGTAGCTGCTCACACCAGCCTCCGGGTGCCTCCCTCTGCTTGTACAGAGCCCATGGTCGGGACAGTGCCCTGGCCTTTGCCGGGGAGGAGGATGCTCTGAGATTCAGGGTGGG…	0.568011	4389
ARHGAP36	FALSE	FALSE	FALSE	TRUE	ATGTTTTTCCTTCTATAAGGTGCCAGACAGGGGAAAAGGGTGGGGGTACATCTGGGATGTCACAGGAAACATTAAGGAGAGAGTTGAAGGTAAAGATCTGAAGGTAAGAAGGAGTTCCACCTGATGCTCGGGTCAGGATGAGAATTCCAAACACACTGCCAGCCCCTTCACTGGGGATGCTTGGTCTCTTCTGCTGGTAAAAGCAGAGATGTTTCTGTGTCATGCCCAAGCTCCCCGGTGCTACCTTGCCTTTCTCTTTTACCCCTGATCTTGGCTTTCTCTCTCTCTCTGCAGACTTTCCTTTAATTGATGTGACATTTGTGGTAAACACCTTTCCCAGGGAACCTCACAAATCTTGAGATGCTTTCCCTTCCCCAGATGGGATTGCATGATTTCCCT…	0.432605	1098
ARHGAP39	FALSE	FALSE	FALSE	TRUE	CGGGGGCGCCCGGGGACAGGAGGGATGTCCTGCCGCCCCCAGCCAGGCCGAACTCCGCACTCGCTCTCCCGGCAGAGGGGCCAGAATCGCCCGGCCCAGCCCTGGAGCCCCCTCCACTCCCCCAGGCCCCTGGCCCCGGCGCTCCCCACGTCTTCTGCCTGGTCTGAGGGTGCAGCCAGGGCACAGCAGCGGCGGGGAGGGCGCCTCTGGCCCCCCACCTCACGGCCAGTTCCCGCGGGCACCGCCTCGCCCTCCGCTGGCCGCGGGTCAGCTCCGAGAAAGTGCCTTCTGTGTCCTGGAGCCGAGCGACGCTGCCTCCTTGGGGCCGGGCTGCCTCCCTGTGGCTCCTGCGCGCCCTGGCCTGGGCCTTGCCCAGCCGCCCCGGTCTCTCCTTCCCTT…	0.619469	1243
ARHGAP4	FALSE	FALSE	FALSE	TRUE	GGCAGGGCCCCTCCGCAAGAGCTCCCTCAAGAAGGGAGGGAGGCTGGTGGAGAAGCGGCAGGCCAAGTTCATGGAGCACAAACTCAAGTGCACAAAGGCGCGCAACGAGTACCTGCTTAGCCTGGCTAGTGTCAACGCTGCTGTCAGTAACTACTACCTGCATGACGTCTTGGACCTCATGGACTGCTGTGACACAGGGTTCCACCTGGCCCTGGGGCAGGTGCTCCGGAGCTACACGGCCGCTGAGAGCCGCACCCAAGCCTCCCAAGTGCAGGGCCTGGGCAGCCTGGAAGAAGCTGTGGAGGCCCTGGATCCTCCAGGGGACAAAGCCAAGGTTCTCGAGGTGCATGCTACCGTCTTCTGTCCCCCGCTGCGCTTTGACTACCACCCCCATGATGG…	0.647273	2475
ARHGAP44	FALSE	FALSE	FALSE	TRUE	TAGAAGTGCAAGCTGAATACCACAGGAAGTCCCTGACACTATTGCAGGCTGTATTGCCTCAGATCAAAGCACAACAGGAGGCCTGGGTAGAGAAGCCTTCCTTCGGGAAGCCGCTGGAGGAGCACCTCACCATCAGCGGCCGGGAGATCGCCTTCCCCATCGAGGCGTGTGTGACCATGCTGCTTGAGTGTGGGATGCAGGAGGAGGGACTCTTCCGAGTAGCCCCCTCTGCCTCCAAACTGAAGAAGCTGAAAGCGGCCCTGGACTGCTGCGTGGTGGATGTGCAGGAGTACTCGGCAGACCCCCACGCAATTGCAGGAGCTTTGAAATCTTACCTCCGAGAGTTGCCAGAACCTCTTATGACCTTTGAACTCTATGATGAGTGGATCCAGGCTTCCA…	0.535531	3307
ARHGAP5	FALSE	FALSE	FALSE	TRUE	GTAGGAAGTGATTGCAAACAGGCTGGATTTGGACAAAAAGCAAATCTAGACATGCATGTTTCAGGGTTCAGTAGTATACTTCATGTTTCATACAGATAATTCACATTCAAAATTACATTTTCTCTTTGAACTAGATGGTATTCCTTATTCACTTACATTACAAATCTAAGACCATGTGATAAGCATGACTGGAGAGGTTTAATTTTTATAAACAAAAATAGCTATAAAGTACAAAGCTGCTGCTGCATGCAACCTTATTGCAATCAGTATATCATTCCTGTGGCAATTTCTGTCACCTTATATTGTGAATAAAATTTTTCTATAGAAATTAAATGATTTAAAAACTCACCTATATGAAACATTTAATGCTTTTCAGCCTGCTTTCTGGCTGATTTTGTT…	0.300837	4780
ARHGAP6	FALSE	FALSE	FALSE	TRUE	CCTGGAGGGACCAGCTAAGGAAGCCCTGACATGCTGCAGTCGGAAGTTTCCTTTTCCGTGGGAGGGAGGCATTCATCTACAGACTCCAACAAGGCCTCCAGCGGAGACATCTCCCCTTATGACAACAACTCCCCAGTGCTGTCTGAGCGCTCCCTGCTGGCTATGCAAGAGGACGCGGCCCCGGGGGGCTCGGAGAAGCTTTACAGAGTGCCAGGGCAGTTTATGCTGGTGGGCCACTTGTCGTCGTCAAAGTCAAGGGAAAGTTCTCCTGGACCAAGGCTTGGGAAAGATCTGTCAGAGGAGCCTTTCGATATCTGGGGAACTTGGCATTCAACATTAAAAAGCGGATCCAAAGACCCAGGAATGACAGGTTCCTCTGGAGACATTTTTGAAAGCAGC…	0.480272	2357
ARHGAP8	FALSE	FALSE	FALSE	TRUE	AGTACACACTGGACCAATACGTTGAGAACGATTATACCATCGTCTATTTCCACTACGGGCTGAACAGCCGGAACAAGCCTTCCCTGGGCTGGCTCCAGAGCGCATACAAGGAGTTCGATAGGAAGTACAAGAAGAACTTGAAGGCCCTCTACGTGGTGCACCCCACCAGCTTCATCAAGGTCCTGTGGAACATCTTGAAGCCCCTCATCAGTCACAAGTTTGGGAAGAAAGTCATCTATTTCAACTACCTGAGTGAGCTCCACGAACACCTTAAATACGACCAGCTGGTCATCCCTCCCGAAGTTTTGCGGTACGATGAGAAGCTCCAGAGCCTGCACGAGGGCCGGACGCCGCCTCCCACCAAGACACCACCGCCGCGGCCCCCGCTGCCCACACAGC…	0.555471	1316
ARHGAP9	FALSE	FALSE	FALSE	TRUE	CACTCTACGGTACCTCCTGGAGCATTTATGCAGGGTGATAGCACACTCAGATAAGAATCGCATGACACCCCACAACCTGGGAATTGTGTTTGGACCAACCCTGTTTCGGCCAGAGCAGGAGACATCTGACCCAGCAGCCCATGCTCTCTACCCAGGGCAGCTGGTCCAGCTGATGCTCACCAACTTCACCAGCCTCTTCCCCTGATGCAGGGAAGGAAGAAGAGAAAACATATTTCCGGTCATCTCTGGTGGTGAGAGGCTGGTGTTCTGTTTTGAGGATATCCCTTTAAATCTCCCAAATGACTGTCTCTATCTTCATGAGTGTGACTTGAGGTGTTGGGATGGGTGAGGGAGCTTCTCTAAAGAGGAAAGTGAGTGGATTAACCCCTGCTTCTCTTC…	0.486842	456
ARHGDIA	TRUE	FALSE	FALSE	TRUE	GCCCAGCCAGAGGCGGGCAGGGCAGACTGACGGACGGACGACGGACAGGCGGATGTGTCCCCCCCAGCCCCTCCCCTCCCCATACCAAAGTGCTGACAGGCCCTCCGTGCCCCTCCCACCCTGGTCCGCCTCCCTGGCCTGGCTCAACCGAGTGCCTCCGACCCCCCTCCTCAGCCCTCCCCCACCCACAGGCCCAGCCTCCTCGGTCTCCTGTCTCGTTGCTGCTTCTGCCTGTGCTGTGGGGGAGAGAGGCCGCAGCCAGGCCTCTGCTGCCCTTTCTGTGCCCCCCAGGTTCTATCTCCCCGTCACACCCGAGGCCTGGCTTCAGGAGGGAGCGGAGCAGCCATTCTCCAGGCCCCGTGGTTGCCCCTGGACGTGTGCGTCTGCTGCTCCGGGGTG…	0.665801	1155
ARHGDIB	FALSE	FALSE	FALSE	TRUE	ATGCATCCACCCCTTTCCCCACCCTTGCCACCTGGAAGAATTCTCTCAGGCGTGTTCAGCACCCTGTCCCTCCTCCCTGTCCACAGCTGGGTCCCTCTTCAACACTGCCACATTTCCTTATTGATGCATCTTTTCCCACCCTGTCACTCAACGTGGTCCCTAGAACAAGAGGCTTAAAACCGGGCTTTCACCCAACCTGCTCCCTCTGATCCTCCATCAGGGCCAGATCTTCCACGTCTCCATCTCAGTACACAATCATTTAATATTTCCCTGTCTTACCCCTATTCAAGCAACTAGAGGCCAGAAAATGGGCAAATTATCACTAACAGGTCTTTGACTCAGGTTCCAGTAGTTCATTCTAATGCCTAGATTCTTTTGTGGTTGTTGCTGGCCCAATGA…	0.481188	505
ARHGDIG	FALSE	FALSE	FALSE	TRUE	ACCCCCAGTCCGTGTCTCCCCTACCTCCCTCAGTTGTTGCACAGGGACCCCCAAGCATCCCCAGCACCCCCCGTGAGTGACCAGACCCTCCCCTGCTGCCCCTGCTGCCCCTGCTGCCCCTGCTCTGTCCCGGGACCCCCTGGCCTGGCGCTGTCCCCTGAGCTGTCCCATTAAACATGGCCCTGTCTCTCTCGGT	0.673469	196
ARHGEF1	FALSE	FALSE	FALSE	TRUE	GAGATACACGGACAGAGGGACATATGGATACAGTCAGGCTCCGCCCCGCCAAGTCCCACACCACCTTCTCTGGGGAAAGGCAGCTCTCACCTGGGCAGCCCCTGGAGGCTTCTACCCCTAGAGGGGAAAATAGGTCTCACGGCAAGACAGCAGTCCCCAGGTGGATATTCAGGGGCCAGGACAGCTCTGTCGGATCTCACCAACCCCACCAGCGCCCAGGTGCTGAGACCGAGGTGCTGAGAGGCTAGAAGAGAACTTCAGCCCTGCCTGACAGAGAAGGTTCAGCCTCACTCCCGCTCACCACTCACTCAGGCAAGTCGCTAAACATCCCCGAGCCTCAAGTTTCCTCATCTGCAAAATGGGACAATAATGACCTCCCTCCTAGAGTGGTTGGGAAGG…	0.539773	528
ARHGEF10	FALSE	FALSE	FALSE	TRUE	GCAGGACGGCCGCCTTCTGCTGTCAGAATTTGCAATCAAGGGTGACTTCTCAGCTAATCCTACAGCCTGAGTGGTTAAGCTGTGTCTACACTGGTTGGGAATAAATTAAAAACAGTATTTGGGGGAGAAACGTGCAATAGCGTAATGGTGGTGTCCCTGCCAATTCCTTCCTTCTCTTCTGTACAGCAGAAGTAATTACAAGCACTTCTCACGAAGGCAGAAGACTGATGCAATTTTCGAGTAATTGAGTGCAGTTCTGGGAAAATACCACATTCTTTTTGACTGCTGTAGTCCATATGTGAATACTAAATGTTAAACTTCATCAGCGTCAGACCTATTGTATCATATTAGAGAATTTGCAGACTAAGAATTTATGAGAAAATATATGTATTCAGTAGT…	0.399855	1378
ARHGEF10L	FALSE	FALSE	FALSE	TRUE	GCTTTTTAAAGTTGTATATCTCCAGATAGATGGCTTGGGCCAGAAGCACTTGTGTGTCACCAGCCTCCTGATCTGCCAGGGTCTGCTCTGGGTGGGCACTGACCAGGGTGTCATCGTCCTGCTGCCCGTGCCTCGGCTGGAAGGCATCCCCAAGATCACAGGGAAAGGCATGGTCTCACTCAACGGGCACTGTGGGCCTGTGGCCTTCCTGGCTGTGGCTACCAGCATCCTGGCCCCTGACATCCTGCGGAGTGACCAGGAGGAGGCTGAGGGGCCCCGGGCTGAGGAGGACAAGCCAGACGGGCAGGCACACGAGCCCATGCCCGATAGCCACGTGGGCCGAGAGCTGACCCGCAAGAAGGGCATCCTCTTGCAGTACCGCCTGCGCTCCACCGCACA…	0.584602	1182
ARHGEF11	FALSE	FALSE	FALSE	TRUE	CCGTACAAACCACCAAATCCTCTGCGTCCCCACTCCTCCTTCAGGGACTGGCCTGAGACCGGGGCACAGGGTAGGGGGGATCCCAACACTCCTCCCTGTGGAGGAGGCAGTTAGGGAAACTAGGATCCAGCCAAGGCCCGGGGGGAGACCCGCATGTTGCTTGGTCTGCTCAAGTCGGAGTCAGGTTTCAGTGTCTTTTCCCTCCCTTAGCCCAACCCTCCAAGGCCTCATGTCTCCTAAGCATGCTGACTGCATCCGAAAGGCCCCCACTCACCATGGTCTGCCCTCACCCCACATATGTGTGTACACGCGCACGCCTGTATGTGCGCTGCCCTCAGACATGCAAGTGAAAGGAGGAGGCTTCTGTGTAAATGCACTTTCTTCCTCCCCTCTTTCTCC…	0.506897	1160
ARHGEF12	FALSE	FALSE	TRUE	FALSE	AGCCGCATGTCCTGGAGGTGACTGCAGGTTGTTGGATTTGGAGTATCGGCCGTGTCTCACCACATCCTGGCTCCAGTGTGGATGCAGAGAGAGTGTGACAGAGGATCTGCCTGTGAACCACCTGGGATTAGTCAAGTCCCAAGGTGCCCAGAGTGGGACTAGTTCTTCACAGTGTGGCAGCTGCACTAATCTGTTTGTGAGGGAATATCCATTCCCTCACTCTACTCTCCTCACTATCGGAAATTCATTTTGATTCAGAATAAAAACCAAATGTATAGAGCTTTGGGTGTAGGATATGAAATTGTACTTAGATTTAAGAAAAAGAGAAAATCAGATGTATTTATTTGACTTCATTCCGTATTTGAAAGCACATTTTAATTTTTATTTGCCTTGTTTTGT…	0.380531	4859
ARHGEF16	FALSE	TRUE	FALSE	TRUE	CCCTGGCGAGGCCAGCCGGCGGCAGCACAGCCTGTCTCCAATCAGCAAGTGGTCGTGCCTGGCTCTAGAGAGCGTGGGGAGCTGGTCTCAAGGACCCAGCATGGTTCCCTGGGGCTTCCCAAGAGCCTGTGGCTGTGGTGCCGGGCTCCAGACACTTCACGGAAGGAAGATCACATGTCCCCAGAGAGGCACCCCCAGGCAAGCTCGAGGGGGCCACACCGTGTCCCAGGGAGCCCAGCCTATTCCCGTTGGCTGGCTGGGCCCCTCAGCTGCTGGGCCCCACCTCCCCACTGCACCCAGGGGGCAACTCCACCTGGACTGATGGGCACAGGAGGCACCAATAGCGATTATTGGGGGCAATGCGAGGTCTCCTCCTATGCCCTTCCTACCCCTGAGTGG…	0.623574	526
ARHGEF17	FALSE	FALSE	FALSE	TRUE	CCCTGTCTGCCGTGGCCCAGGACTCGCCCGCCCACCTGCCTTCAGCCTGCTTGCCTCTCCCTAGCCCACACGCAGACTTTGACCAGGAGTATCCAGCCAGGGGCACACATGTGCCTGCGTGGGCTCTGCCTTGTCTTCGCGGAAGCATTCCTGATGGAACACCCACTGGCCAGCCAGGCCATGGCTTCTCCCGACCCTCTGGCTGCCCCGGTGCTTCCAGTCATGATCGGGTGGGGGACATGTGGGCTGACCAGGACCTCTGACCCTGGAGCTTCTACCAAAGACACAGCTGGGTCTGGACCCCACGGGGCTGGGGAGGGCCATGTGCAATATTTGGAGGGTTTTCTGGAGGGCAGCAGGAAGGCTGGGGAATTCCCCATGTACAGTATTTATGTTTCT…	0.544154	1608
ARHGEF18	FALSE	FALSE	FALSE	TRUE	AAGGGCCGTGACTCAAGGTGCAAGGCCCCTCCCTGCCCTGCCCACCCTTCCTGCTCTCTGGGGACCCCCATGGGGTCACCATGCCCACCCAGCTGTCCCCTCCTCTTCCCTAGCAAACCACTGATGACCGCCTGGCAGGGGCCAGCCTGTCGGTGCTCTGGGCCTTGCAGCTGTTTCTGTAGGGTTAGCGGTGGTGCCGGGGTCACTTTCTGAATCTCTTTTTTTTTTTTTCAAAAAGGAAAGTTTTTAATGGAAAGTTGAGCCAGAACTAAACCAGGGAGCTGTCTGAAATCATAGCACCCCATCCGGGTGGCGGGGAGATCAACTCCGAGCTGTTTTTCCGAGGCAGTGAGGAACGGTGCCGGCTCTGCACGGAGCTGAGGACAGGACAGACCTTGC…	0.592933	2179
ARHGEF19	FALSE	FALSE	FALSE	TRUE	TGGGCAGCCATGGCCTAGGACCCCACCTCCATGCCTGGCTCCTGGATGGTCCTGGAGGGGCCTGCAGTGTCTCCATTCCCCAAGCTGCTCCTGCTGGCACTTCGCTTCTGTGGCCTTGGCATTGAGGGCACAGGCTGGACACAGGAATGGGGGCGCCTCCAGAGGGTCTCTCCGTCCTCATGCTCCTCAGTGTCCACACTTCAAGGCCAAGGATAGTTTCTTCCTCTGACATGGGGACCATAACAGGTGATCACTGATACCTGGCAAAGACTGGGGCCCTCTCCTTTCTATGTCCTCAATCCTGCCTGACTCTTGGTCCTTCTGGCAGGGACCTGGCTGGGGAACGTTCTGGTGCTGATGGTGCTGGGACCTATATGTATATTTATATATATCTGGGGT…	0.556936	483
ARHGEF2	FALSE	FALSE	FALSE	TRUE	GGGGGCCCCTCCCCCCTGCCCCGTGCCCCACTGAAGAACATTACTGAGGGGGCTAACCTTGGGGACTCCAATTTGCCAATGATGAGGGAACATTTGAAAGAACTGCAAATTGTCCTTGCCAGCTCTTGGGATCCTTGGATACCTGGGGCCATTTAAGAAGCTAGGGGAATTAGGCCACAACACCCCCTGGGACATCCGAAAGCTACACCACAGATGCCAGTGGTTCATGCCTTCTTCCCGCAACTTTAGGAAAATTTATTTATTTATTGTTTATTAGTTATGGGGGGAGAGGGGAGATTTAAAGGACCAGGGACATGGGAACCAAGCCATAGGGATCAGAGGGCCTTGTCCTTGAACACTACTGGGGTATATTCAGGCTCATCCACGCAGCTGCTGGGT…	0.489459	1091
ARHGEF25	FALSE	FALSE	FALSE	TRUE	CTGGTGAAAACCATGGGGGTGGTGCTGACTCAGCCGCCTATTCCCCAAGGAGCTTCAGGGCAGTCCTTCTGGCACTGCTCCAGAATTCCTCCTTCTTGGTGTGTCTGGAGGGTGGGCAAGGCTGGGAGGGATATCAACTTGGAGGAGAACACCTAGACCCAAGGACTTTTTTCTGCCCAAGGAACACAGTTTCCTTCAGCTCCCATCCCTATGCATGCATCATGGTCCCCCCAAAAGGAGGATATGTGGGTGGGTGGGAGGGCTGGGGCAGGGGCCAGATAGAAATTATTGGTTTTGTTTTTTAATTTTGTTTTTCCTGTTTTCTGAGAATAAAGGTTTTGTTATATCA	0.498567	349
ARHGEF26	FALSE	FALSE	TRUE	FALSE	TCTCTCAGATGGTCTTTTGTTACTGCAAGATTTGCACGACACTTACCGGGCTGGTTGGTTCTGGGCTAGTTTTATTGTTAATTTTGTCACAGCCTATTTAATTAAAAGAACGAAAACACTTGCCTTTAAGCTTGCCAGGTTGTTCTGCTCTCTCATGAGAAGAGCTTGGATACAGTGAGTTTGCACAGCTCAGTTTTTACCTAACCACACACTTGCAGACCTCCTGAGGTACACAGAATAGCTGAGCAGTTCACTTCAGGGATCAGGTCATCTCTGCTCCTCCTAGTTTCACCATGTTCTGGCAATAAAAAACACATATTATATCCTGGTTTTCTCTATCCTTGCATTACTAAGGTGACTGTCTCTCTTTATACATCCTTGTATGGTTCTCCCAGTATT…	0.387001	2354
ARHGEF28	FALSE	FALSE	FALSE	TRUE	TTGTGTTGTCATTTTTCCAAACAAAACAAAACACTGGCACTTTTGGGAGAAACTTTTTGTCTCCATTCCTTATGTATGTGTGATTGTCTGTGTCCAAATTGCTTTAAGAATAATATTTAATATTTCCTGGAAGCTCATTTTTTTGGCATGAGTCTAATTAAATTATTGAAAGCCACCCTGTTTGTATAATCTTTAACTTATCAAATCTAATTTCAGATTTCTGGAGGAGAAACTAACTTGAATAAGCAGGACTATTTTAAAAGTTGTTTTGACGCTAGAGTAAAATTCCATGTCACATTTTCTACCCAATCATCTGGATTTCAAGATTCCTTTTAAGATCTCAATGAAGCAATTTGGATTTAAAGAGTGGTATTCACAAGGGGTGAACTTTCACAGTCA…	0.403061	980
ARHGEF3	FALSE	FALSE	FALSE	TRUE	TAGCTACTGCAGCAATCAAGTAGCCGCCAAAGCTCTGCTGGACCACAAAAAGCAAGATCACCGAGTCCAGGATTTCCTACAGCGATGTTTAGAATCCCCCTTTAGCCGCAAACTAGATCTCTGGAATTTCCTCGATATTCCAAGAAGCCGCCTGGTAAAATACCCTCTGCTTCTCCGAGAAATCTTGAGGCACACACCAAATGATAATCCAGATCAGCAGCACTTGGAAGAAGCTATAAATATCATTCAGGGAATTGTGGCAGAAATCAACACCAAGACTGGTGAATCTGAATGCCGCTATTATAAAGAGCGGCTTCTTTACTTGGAAGAAGGCCAGAAAGACTCCCTGATCGACAGCTCTCGAGTCTTGTGTTGTCATGGTGAACTGAAGAACAATCG…	0.458669	1984
ARHGEF35	FALSE	FALSE	FALSE	TRUE	TATGTCACAGTTTCATGTTTATCCAGTTCAATGTATTTTTAAATTTTTCCTTGAGACTTCTTTGACTGATAGATTATTGTGAAGTGTGTTTTTAAATTTCCAAATGTTTAGGGATTTTCATATCTTTCTTATGCTGATTTCCAATTGGATTCCCTACAATGATTTCTGGTTTTCATCTGCTCTGGATGATTACTATCTCTTTTAAATTTGTTGTGGCGAGTTTTAGGGCCTAGGACAGCTCTATCTTGCCATGTGTTTCGTCAGCACTCAAAAAAAATATGTGTATTCTGCTGTTACTGTGTGGAATATTCTGTAAATGCCAAATAGATTCTTTTGGTTAATGGCATTTTGAGTTGTTTTATATTCTTGTTGATTTTCTTTTTTTTCCTCTTTTTAAAA…	0.303783	846
ARHGEF37	FALSE	FALSE	FALSE	TRUE	GGTACCCTCTTTGGAGCCTACATTGCCAAATGATGGGGGAGGCTTAGAGGCTCTGACCCTGGGGGGAAAAGAAGCAAAGGAAAGGTGGAGGTGGAAGGGAAGACCAGGCCAGGGTGGGTGAAGCACACTCAGGAGGCAGCCAGAAGACATGGGCGGGCCTCGCAGAGTGCTTGGTGTGGTGGGGGCACAGGAGGCTCCAGCCAGGACTGCTCATTATGTCTGCATAAAGAACTCATTCCGACCTGGGGTCACAATGCACTTGGACAGCAGGTCACAGCTGATTGGCCAGGACTCTCCATAGGTTATGGCCAGTCTTAGCTGTGCCTGCATCCGGGCCTGCCTGTGGGCGTGGGTCACACGGGATAATGTTACCTGCGTGCTGTGTGGTTGCAGGAAGCG…	0.489377	2777
ARHGEF38	FALSE	FALSE	FALSE	TRUE	GAAAATAAGCCTTCAACTTTTATTTTCCAGCAAGTTGTTGATTGACTACCTCATAAAACTGACATTACAAAACTTTGGACCAGAAAGCAAGAAACCTCTGAACTACAGAAACTGATACTGTACTGGGTTTTCAGGAATACTGTACTTCCTAACAGGATTATTGCATGAATGTATTATAAAGGATACATGTTGAAAGAAATACTAAGCCAACAGAAATAGCAAAGCAAATGACCCAAGCTTCAACTATCAACTATTTAAAAGTGAAGATCTTTTGAAGGAGTAATTATATTCTTTTATCATCAAGAAAGGTTGGATCCAAAGGTTTTTCAATTTACTTTTTTTTTTACTGTATGATGTATTTTGCCTTAAATGTTTTTGTTTTTCATATTGCTCTCTTGC…	0.347446	2976
ARHGEF39	FALSE	TRUE	FALSE	TRUE	AGGAATCTTATAGATTCCAGAACTCAGGATACCTCAGGGATAGGTCACAGCCAAGAGTACAAAGGAATCTTCAGTACTGAACAAAACAGAACCCTTCATGATTTGACAAAGGTCACTTTCTGTTTGCCTGGACCAAGCTACTCCAGATCATCTGACCAACTCTTAAAAATCACGGCCAGGCACAGTGGCTCATGCCTGTAATCCCAGCACTTTGGGAAGCAGAGGTGGCAGGATCATTCCAGCCCAGGAGTTCAAGACCAGCCTGGGCAACACAGTGAGTGAGACCCTGTCTCTATTTAAGAAAAAATAATTAAGAAATTTTATTAAAAAAGAAGAATCAGGAAACCAAGTCCAACCCAACTAAACCTCAAATGAACCAGCCCCTAACACAGATGAGGG…	0.48846	2643
ARHGEF4	FALSE	FALSE	FALSE	TRUE	GCAGAAGGAAGAGAGCAGGGAAGGAGGCCAGGGTCCGCGCGGCTTGGGCACAGTGCCCTGGCTCAGGGACCTTCCTGGGAGTGAGAACCACATGCCCTGGGAAGAACCAGCAGGTGAGAAGCCCAGTTGCTCTCACAGTCAGAAGGCGTTCCACATGGAGCCTGCCCAGAAGCCCTGCTTCACCACTGACATGGTGACATGGGCCCTCCTCTGCATCTCTGCAGAGACTGTGCGTGGGGAGGCTCCTTCACAGCCTAGGGGCATCCCTCACCGCTCGCCCGTCAGTGTGGATGACCTGTGGCTGGAGAAGACACAGAGAAAGAAGTTGCAGAAGCAGGCCCACGTCGAAAGGAGGCTGCACATAGGGGCAGTGCACAAAGATGGAGTCAAGTGCTGGAG…	0.599442	3228
ARHGEF40	FALSE	FALSE	FALSE	TRUE	GGAGCCCCCACCCTCCCGAGACACGCTGAACACAACTCTTCATTACCTCCACTCACTGCTCAGGCCTGATCTACAGACACTGGGGCTGTCCGTCCTGCTGGACCTTCGTCAGGCACCTCCACTGCCTCCAGCACTCATTCCTGCCTTGAGCCAACTTCAGGACTCAGGAGATCCTCCCCTTGTTCAGCGGCTGCTGATTCTCATTCATGATGACCTTCCAACTGAACTCTGTGGATTTCAGGGTGCTGAGGTGCTGTCAGAGAATGATCTGAAAAGAGTGGCCAAGCCAGAGGAGCTGCAGTGGGAGTTAGGAGGTCACAGGGACCCCTCTCCCAGTCACTGGGTAGAGATACACCAGGAAGTGGTAAGGCTATGTCGCCTGTGCCAAGGTGTGCTGGG…	0.606024	3287
ARHGEF5	FALSE	FALSE	FALSE	TRUE	GTCTTCTCTGAGAGGAGTTTCGTGAGCTGAAGAACAAGCTGCTCATGGCAAGGGCTGGCCCCAGAACCCTGCAAGAGAGGCCTTCTGTGGATGGAGAACTAGGCCTTCTCAAAGCTCAAGGACAAAATCCAGCTAACCCAGTCCCTCGGCCCAGGCCTCCTTTCGTGCTTTGTGCTTGGTGGGGGGGATTTCGAGGGACTTTGCACTGGACTCTGGGAACCTTTCATCATTAAAAAAAGGGGGACCATTGGGGCCTGAGCCAAGGAACTTTCCTTCTACTGCCTTATAGTGCTTAAACATTCTCCGCCTCCAGGGTGCAGATTCAGAGCTGGCCAGAGTTTCAGTGATAGCCGTATGTTAAACAGAATCTCACCTCAGTCTCCTGGAGGGAGATGTTTA…	0.5	576
ARHGEF6	FALSE	FALSE	FALSE	TRUE	CCATCACTGTGCCACTGGGTGGAGTGTGCCTTCAGGGCATCTTGAAATGTCCCGCTGAATGATTTGACTCAGTTTGCTCACTTCTTTGGCTTTTGTTTTGTGTTTGAGTCTCTCTCTCTCTCTCCCTCTCTCTTCTCTTTCTCTCCCCGCTGTGTGCATATGTGTGTGCGTGCACGTGCGCGCTTGGGCATTTGCTGTTGTTTGGTTATTGGTTGGTTGTTCATTTTTTTTTTCAACAGGTGAAAAAGCAGGAAGTGGTGGTAGAGATGGCCTCAGAGTCTTTTCCATTCAGTAAGAAAGAGAAAGGGAATGCAGGCCAGTTACTTAAAAGGTCTTCAGATTGCCTTCAGTTCACAGTGCCTCTGCAACAGCCATTGCCCTCAGGTCACATTCTTTGGG…	0.425463	2482
ARHGEF7	FALSE	FALSE	FALSE	TRUE	TGCACTTCTGAGCTTTTCTTAACAAATGCTTGTTGTATCGCAGCCTGCTTTTCTTAGATGTTTTCTTGCTGTTCCTTGTCTCTTTTATGTGATATTTTAACAACTTTTGAGAGTGTTCCTGATATTTCCCATTGTACTTTGTGGAGGCTTAACTGCCGATGCGAGTATACATTCGAATGACTGACTATTGGAGGGAGGTGGTGTGTTCACGTGAGCCTACATCCGAGGGTGCTCTTCGTAAGGGGTAGTTGTTGTTTTATAGCTCCAAATGGTTTTTTTATTCTCAGTGTAGCAACTGTTTGATTTCTTTCTGGATACAGCTGTATGAACACTTTTCTATTTTATACTGAAATCACACAGGTTTGTGATCTAAGTGCCAGAACCATGGAGGAGACTCTG…	0.413552	2863
ARHGEF9	FALSE	FALSE	FALSE	TRUE	ACTCAAGCAATCCACCTGCTTCAGCCTCCCAAAGTGCTGGGATTATAGGTGTGAGCCACCACCCTGGCTAATCTTGTTTTAGTTGAGCTCTGGGTGAACCAGGAGGATGAGGTGGAGGAGGGGCCCAGCGATGTGCAGAACGGACACCTGGACCCCAATTCAGACTGCCTCTGTCTGGGGCGGCCACTACAGAACCGGGACCAGATGCGGGCCAATGTCATCAATGAGATAATGAGCACTGAGCGTCACTACATCAAGCACCTCAAGGATATTTGTGAGGGCTATCTGAAGCAGTGCCGGAAGAGAAGGGACATGTTCAGTGACGAGCAACTGAAGGTAATCTTTGGGAACATTGAAGATATCTACAGATTTCAGATGGGCTTTGTGAGAGACCTGGAG…	0.466863	4406
ARID1A	FALSE	FALSE	FALSE	TRUE	TGATGTCCCTCAAGTCTGGTCTCCTGGCAGAGAGCACATGGGCATTAGATACCATCAACATCCTGCTGTATGATGACAACAGCATCATGACCTTCAACCTCAGTCAGCTCCCAGGGTTGCTAGAGCTCCTTGTAGAATATTTCCGACGATGCCTGATTGAGATCTTTGGCATTTTAAAGGAGTATGAGGTGGGTGACCCAGGACAGAGAACGCTACTGGATCCTGGGAGGTTCAGCAAGGTGTCTAGTCCAGCTCCCATGGAGGGTGGGGAAGAAGAAGAAGAACTTCTAGGTCCTAAACTAGAAGAGGAAGAAGAAGAGGAAGTAGTTGAAAATGATGAGGAGATAGCCTTTTCAGGCAAGGACAAGCCAGCTTCAGAGAATAGTGAGGAGAAGCTGA…	0.524062	2265
ARID1B	FALSE	FALSE	FALSE	TRUE	TGAGTTAAAGACTTTTAGAAAGAGCTGTTGTTTTTGTTTGTTCTACTTTATATTATGACATGATTGAGAAGTTTCTAGACTTCAGGTTTATTTTGTGGTCAATTTTTCAAGGTTTACCTTTTAGGAGCTCTGTAGTCCTGGATAAGTCTATTTCATGTGTATATATCTCTGTTGCAGAGTGTAGACATCAGTTGGAAGGTTTTATGCGGCTGGTCGATTTTGTGTGCAGGTGGTTATTGCTGTTGTACAGTTGAGCTTTCTTTAGGCTGTTGCTTTTTGGCAGCGATACAGAACAGAGGTGTCCTTAGAGGAGTCAAAACTTAAAAGAAATTTGCACTTTGCAAAGGATACAAATGATGAGATAAAATACCTGATAGTAATTTGAATTTCTTCTAGGAC…	0.356126	8292
ARID2	FALSE	FALSE	FALSE	TRUE	AAAAGAATTTTGCTGTGCAGCCTTCCATATTTAGAAAGATTGTTAAAGAGACATGAAAATAACTTATCAGTGCTAGCCATTAGTAACATGGAAGCTTCCTCCACCCTTGCCAAATGCCTTTATGAACTTAATTTTACAGTTCAGAGTAAGGAACAAGAAAAAGACTCAGAAATGCTGCAGTGAAAAATAATTCCACTTACACAGTGGGGGACTCAAAGTCAGCCACATTTCACATACTGTTACTGAAGAAAGCACCAAGTCTTAATGGAACAAAGACCATAGAATGAATTATTTTATCTCCTCCCATGATGCTGAGAGGAAGCTTCGTATTCTGATCTCTGAGTGAATCCCTTTGTTCTCTGTTTAAAAAAATCTAAAAAGAAAAAGGAAAAAAAAAAA…	0.332273	3145
ARID3A	FALSE	FALSE	FALSE	TRUE	CCGCATCACTCCCCACCCGCCACCCACCCTGGAGCCCGCCGGCCTGGGCAGGGGGTCCAGGTGGGCCACACAGGGGCCAGGATGGCGGAAGATACGGGTGGGGAGGGAAGATATCCAGAAAGGAGCCACAGCTGACGCCAAAAAGAAAAGAAAAAAGATATATATATATATATATATATATACACGTATATATATAAAGAGAATTTAATAAAACAGGGGAAAACCAAGGAACACTTGAATTTCTCAGGTTTTGGACATTCAGAGAGATGAATTGTGAGAACAGCAAAGAAATCCATCAGAAAAACAGAAAGAGGCAGACGTTTCCCAGGGCGTTCAGGCAGCCCTGATGGACCGAAGGCTCTGGTGTCTGGTTTGGCCCCACAGCAGTGTGGGCCGATC…	0.545361	3869
ARID3B	TRUE	FALSE	FALSE	TRUE	TGGGCAGGACCCAGCTTCCCACTTGCCACTCTCCTGTCGAGAGTGAAGGAAGTTGATGCACAGAATTTACCTCATCTCACAGAGCCCACGTCGACGAGCACCATTTGGCCAGACATTGAGAGTTTGGACGTGTCCGTCTGTCCAGGCTCCATTCAGGTCCTGCTGTACTCTGGGGGCAGGGAGAGGCTAGAGGGGCAGGACAGACAGCGTTGTCCAATCAGGGATTGTCCTGGAGAACTGGGTGGGGGTCTGTGGGTGTCCAGCTTCCTCCAGGGTTCCCCAGCCACCTCCCAGCTCAGGGCACAGTGTATCGACAATCTGTCAGCCGACGCAGGGCTGGAGGCCCTCCATTTCCCTCCCCTTTTAATTTATTTCCCTGACCCTGCCTTCTGCCATGAC…	0.561307	2357
ARID3C	FALSE	FALSE	FALSE	TRUE	GAGGTCCTACTTGAAACTAAGAGTCCCAGCCCCATTGCTGAGGGGGGAGGAGACCCCCTGCTTTGATTCTTTCTGGCTG	0.556962	79
ARID4A	TRUE	FALSE	FALSE	TRUE	TAAACATTTTCTCTACCTTCCCAGCAGTTTGCTGCCATGGACATAAATCCCCAAACCCTGAATTACAACCACAGAAAGCACTCAACTGGTTTGACATTGCTAAGTATATCCTGTATACTTTTCCAGGCTGGATTGTATCTATTCCCCTCTCTCTTCTTTTTTCTTGTTGCAAAAAATAAGCTGATTAATAAGTGAAGGTTAAGCAGCCTGCCATATTTGTCATAATTTTTCCTCTTTACTTTTGTTTTTCGTTTGTTGTGATATAGAACAAAGGGCACTTAGCAAATTTGAATTTGTATAATAAAGCTTTCAGGTGTTACAGAAATCGTAGACAAGCAAGTGCACATGATAAACATCAAAATATTACCCAGCTGAATAGTTACTGCTGCACTTTCACTA…	0.307165	1898
ARID4B	FALSE	FALSE	FALSE	TRUE	CAGCAGGACTTGCTAAAGCACTTTGCACTTAATGGCTGTTGAGGGCCACTTTTTTTTTATACTGCACAGTGGCACAAAAAAATATCAGACAAGCACTATTTTATATTTAAAAATTGTTTCTTGACAAGCTGACTTGGCACTTAAGTGCACTTTTTTATGAAGAAAAAGTACAATGAACTGCTTTTCCTCAAGCAATAATTGTTTCCAACTTGTCTGGGAATTGTGTGTCTGGTAACTGGAAGGCCTTCCACTGTGGCAAATGGAGGCTTTTCACTGCCTGTAGAGACAATACAGTAAGCATAGTTAAGGGGTGGGTCAGAACATGTTAAGATAACTTACTGTATATGTATTCCCTTGTATTTTGTTAAAGCTGGAACATTTGATATTTTTCCATTTATT…	0.314724	1630
ARID5A	FALSE	FALSE	FALSE	TRUE	CCGGGCGCCGCCTCTGGAAGAACGTGTACGACGAGCTGGGGGGCAGCCCAGGCAGCACCAGCGCGGCCACGTGCACGCGCCGCCACTACGAGAGGCTGGTCCTGCCATACGTGCGGCACCTGAAGGGGGAGGATGACAAGCCGCTGCCCACCTCCAAGCCCAGGAAACAGTACAAGATGGCTAAGGAGAACAGGGGGGATGATGGGGCCACCGAGAGGCCGAAGAAGGCCAAGGAGGAGCGGCGCATGGACCAGATGATGCCAGGAAAGACCAAAGCAGATGCTGCTGACCCAGCACCACTTCCCAGCCAGGAGCCCCCCAGGAACAGCACAGAACAGCAGGGCCTGGCCTCTGGGTCTTCTGTGTCCTTTGTGGGTGCCAGCGGCTGTCCTGAGGCCT…	0.641097	1786
ARID5B	TRUE	FALSE	FALSE	TRUE	GCTCAGCTCTGCCCAGCAGTCCAAAGCGGCATGGCCAACAGAGCTTCACTCCTTACCCAGGAGTGCTGGCTTATAGAGTTAGAAGTCAGTATTTCTTCTAATCTGAGGCTATGATCAGTCCCAGCTGTAGGGGCCCAGAGGGGAGGTGAACATGCCTGATTTTTGTGGGACAACTCTAGCCCACAAACTGACTGGCTGGTGAGTCTTGACTCCCTTCCAACACAGATGCCCAGGCACCTCCAGATCATTCACTTCGCACGTGGGCCTTGTGAAGGGATTTGTGAATATCCAGGAAGAACTTAGAGGACCCCATCTGAGTTCGGATGGTCAGGAAACAATCTGGGCAAAAAAGAGGCAGGCATTTCAAAGGAAGGGGCAAGGAAGACTGGCAAACAGATG…	0.387583	3914
ARIH1	TRUE	FALSE	FALSE	TRUE	GAATGGCCCTGCATAAAATGAACTCTGAAAACTTTACCATCTAGAGTGCTCATGCAATTAAAACAAAACAAACACAAACAAGGAGGCACTAAGCCTATTCTGACACCACTGGTCTGTAGTACCAGAATTGTTTTGTTAATGGAAAGTTTAAGTAAATTATATTGTAATAAAAAGGTAGATAAACCATTGTACAACAGTATTCTAGGCCACCAACAAAAGTGTGACAGACACACTAAAAGCCCTCCAACTTTAACTTGTAACGTAGCTTCATTCTCAAAGCTGACTCCTTTTTTTTCTTTTTCCTTTTCCTGAGTGTAGTACAGTTAAAATTTCAAACAGCTCCTTGACACTGCTTTTCATGTTCAAACCAGCCATTTTGTTGTACTTTGGTAAAGGACC…	0.387955	19693
ARIH2	TRUE	FALSE	FALSE	TRUE	GTTGGGATGTGGATGTGCCGGGGTGAGGAAGATGTGGCTGCAAGGTCTCCCGGCTGCCATACTGCATGCTGCAGGCTCTGCCTTTCATGACCCCAGGCAACAGCCAGGGCCCCACTCCTGAGAGACACTGGCAACACCTCTTAGTTGATTTCTGTTTTCTTCTCTTTTCACTTTTTGTTTCTACCAGGGTAGAGGCCATGTTGAACTGGCCTCTTTTCAGGACTTTTATTTCCCCCTGGATGGTTGTTGGGAGGGAGGGAAAGTGTTTTCTGAATGGCTATTAATAGTATTAGATCATTACAACTTATGTAACTTTCAAAGGTTGTACAATTATACAAAAAAAAAAAAAAGGCAAACTATAGGATAACACAGAGCCCTTTTTGAAAATAAATTGGCATT…	0.492609	3112
ARIH2OS	FALSE	FALSE	FALSE	TRUE	TGTGGCTAGAGACGGAGGCTCACTCAGATTGTTGCTGCACCACAATGGAAATGCCAGTATGAAGCCGCTGATGTTAGGAAGGCTCCAGGTTGTGCAATTCCATAGACAACAAATCAAATCATTTCCAACCATACTGGAGTCGCGTATATACATATTCAAGACACCTGTGCAGGCCGGGCGCGGTGGCTCAAGCCTGTAATCCCAGCACTTTGGGAGGCCGAGGCGAGTGGATCACGAGGTCAGGAGATCGAGACCATCCTGGCTAACACGGTGAAACCCCGTCTGTACTAAAAGTACAAAAAAATTAGCCGGACGTGGTGGCGGGCGCCTGTAGTCCCAGCTACTCGGGAGGCTGAGGCAGGAGAATGGCGTGAACCCGGGAGGCGGAGCTTGCAGTGA…	0.515337	489
ARL1	FALSE	FALSE	FALSE	TRUE	TTCAGTCCATTCTTCTCCCCTGAAATGAAGACTACATCACCTCTCTCCCTTTGGAAACAGTCAAGTGTACTTCACACTACTAGATGTTAAAACTATATGATTATTGGCATATACTGACTGACTGCAATATTTGTAGTAAATAGGGAAAATAAGTATTTAGTTGGAGGGATAATTTGATCGAATCACCTGAATGTTCTATGTAATGTAAAATATTCTTTTCTTGCTTTCTTGTGTTAAGGTATATATTCTATTTGTATGGAATTCTTATTCAAATACAGTTCTATTAAAGAGTATACTCCTATTGGATGAAAAAAACCTATTTTTGAATAGTAGTTGCAGCTTGTTTGTATAAATACTAAAAAATATCTTAACAGATTTTTTTCCCCTTAAAATGAATTA…	0.359127	2520
ARL10	FALSE	FALSE	FALSE	TRUE	GCTGGAGCTCTCCTGCTTGCCACCTGCCTGTCAAGACCATAGTTGTACTGCTGCTGCTTCATTGCCAGACTGGGCCTGGGGCAAGAGCCACATGGCAGCATTTCCCTTTTCCCCTCCTTTGCCTTTCAAGAGCAGGGCCTGGGCAAGGCCAAGAACCATGCAGAAGCCTTCCTGGTGAGGTGGCCGTGAAGCCGAAGCAGGGAGGTGGGTGAGACAGAGGGTGGGGAGGATAGTGTCTGGCTCATTCCAGGCTGGAATGTGGATCCAGCTTTCCCTTCTCTTACCTGTACAGTGAGATGCTCAGTGGGCTCAATCCTCCACTACAGGTCCCGGTACCTGAGGAACCAGTGTAGGTGTCAGAAATACTCCTAGAGCCTCAAGGTCTCCCAGTCCAGAAAC…	0.445376	10014
ARL11	FALSE	TRUE	FALSE	TRUE	TCCAGACAGAGCAGCATATCTTTGCTCATACAAACTAGAAGAACCAGCTGATCCTTGAGAAATTTACGCTTAGTCTATCAAACAAGAAATGCTGGCTTGGCCCGGTGGCTCATGCCTGTAATCCCAGCACTGTGGGAGACCACGGTGGGGGAATCCCTTGAGCCCAGGAGTTGGAGAGCAACATCACAACACCCCATTTCTACTAATAATCAAAAAATTGGCCGGGCATGGTGGCATGTGCCTGTAGTCCCAGCTACTTGGGAGGCTGAGGCAGGAGAATCGCTTGAGCCCAAGAGGTAGAGGTTGCAGTGAGCCAAGATCGCGCCACTGCACTCCAGTCTGGGCAACAGAGTGAGACCCTGTCTCAATAATAATAATAATAATAATGATGATACTCTA…	0.434016	2834
ARL13A	FALSE	FALSE	FALSE	TRUE	AGGAGTGGCTTATAGACTCCAGCTCCATATGCTGATGACAATATTTTTGAAGAGAAAGTAAAAGAAAGTAACAGAGAAAGTAAAGAGAAAAACAGAGGGAAACCAAAAGAAACAGTTGATATCCCTCCCTTAGCAAACAGGTTCATCTCCAGAACTATCAGGACTACCCGGTTTTTAAATTTCCATTTGATAATATTTCTACACTCCCCATACAACTCCACCTACTCTAATATCACATCCCTGAGAACCCCTGTTGTTCCTGTATATCTATATTCTAGCCATCAAATCAATCCTATACTCACTGAGAGGCTCAAGAAGAGTGAGATGGCATCCATTGAGAATGAAGACCACCTTGGTAAAAAAGAACAGAGACTTTACATCTTTGTACCGAGATGCTGC…	0.377289	546
ARL13B	TRUE	FALSE	FALSE	TRUE	CTCCTACTGTTGGATTTTCAAAAATTAACCTTAGACAAGGAAAGTTTGAAGTCACCATCTTTGACTTGGGAGGTGGAATAAGAATTCGGGGAATCTGGAAGAATTACTATGCTGAATCCTATGGGGTAATATTTGTTGTGGATTCCAGTGATGAAGAGAGAATGGAAGAGACAAAAGAGGCTATGTCAGAAATGCTAAGACATCCTAGGATATCGGGAAAGCCTATATTGGTGTTGGCAAATAAACAAGATAAAGAAGGAGCTTTAGGAGAAGCTGATGTCATTGAATGTCTATCTCTGGAAAAATTGGTCAATGAGCACAAGTGCCTGTGTCAGATAGAACCATGTTCAGCAATCTCGGGGTATGGAAAGAAAATTGACAAGTCCATTAAAAAAGGCC…	0.329002	3155
ARL14	FALSE	FALSE	FALSE	TRUE	GGCTGCGAAAAATCCAAGTCTCTACAGAGACACTGATGAAGTTGAAAGGGTAATTGTTTTTCCATGCCAAATGAGGAAATCAAATTAATGAGTTGACAAACTTTTCCTGAGATGTTATTTCATCTACATTTAGTTAAACAACTTAGAATGATATCTAGAAAATATTTATTTTCAGCCAGGAACTTTAGCAAACTGTGGCAATGATCACTGGGAATGAAAACGTATAATGTTCTACAATTTTTGTTATCACATTGGATGACTTTGAATATAGTAGTGACACTTGGGACCAAATAAATTATTTTATATGACTACTAGAACAAAGTTTTAGTAAGCTGTCTGCTAATAGAGTCAGAATTCTTCCAGATTGTTTCCAGCTGTAACAGGTATTGAATTTCCACC…	0.326376	527
ARL14EP	FALSE	FALSE	FALSE	TRUE	TCTGCGGTACCAAACTATGGAGCCTTTAAAGGTCTTTATTTCTAAAAATCTGTTACTCTAAGATACATTTTAAGCTTGATTATCATATGACAAAGATTTTAAAACCATCTCAGTGTGCCCTAATTTTTCATCTTGGGTGCTTTAAGATTCACTATTTGATATAAATTCAGATAGGCTATTTTTCAGTAGTCAGCGTTAAGCCTGTCTGGATCAATATAAACAAGTAGGGTGTAGGCAGTCCTCTATTTGCATGTTTCCCATGGGCACAAATTTCAGTGACCTAGATTTAGTTTAAATACCAGTTTCCTTACCAGGAAGGAAAGAAAACTGGTAAGGAAACTGTTGTTGTTAAAATCTAGGTTAAAATTTTAGTTAGCACATTGTAACTGAGTAATTACA…	0.333799	1432
ARL15	TRUE	FALSE	FALSE	TRUE	AATCTGGCAAAGAAAACAGGCTCCCAAAAGGCCTTGAACCTATCATGTTAGTTTCTCATTTTAATTTTATTTTGGTATCAAGACTATATTGGCTTCAGTATCTATTTTCCTCTGGTCATTTCAGACTCTCATCTCTCTATTAAAGTGAATATTCTGTAGATCAGATGAATTATCATCGGCATTAACGTCAAGTACACACTACTGAGAGAGAATTTATTCTCTGTTTACCACTAATTATCTTCCCCGCATGTCTCTTCCTTCTGTTGTTCTAAGCATCTCTTCTATACTCTGTGCTGAAACGGATGGAATTCATGGCTTATGGAAATCAAATCCCTTTTGAAGGACTCAGAAAGACTCACAAGACCTTGATCATTTTCTCTGGGTTTGGGAGTGGAGTAT…	0.361621	2616
ARL16	FALSE	FALSE	FALSE	TRUE	CTGCACGGCAGAGGCGCAGCTGGCCTGAGCTGGGGAGAGGTGGCAGAGGGCAGTATGGCTTTGCTGCCAATAGTTTCTTCTCACAGGGGCAGAATAACCCAAAGTAACCCTACATGATGGGGCTCTGTGCTGAGATGCAATGATGTGTAAACTGAGGCATGTGGAGATGGAAGTTGACATCTGGCCTCTGAAAAAAGTGTCCCCAGGGGCTAGGCATGGTGGCTCACACCTGTAATCCCAGCACTTTGAGAGGCCGAGGCGGGTGTATCACCTGAGGTCGGGAGTTCGAGACTAGCCTGACCAACATGGAGAAACCCTGTCTCTACTAAAAATACAAAATTAGCTGGGTGTGCTGGTGCATGCCTGTAATCTCAGCTACTTGGGAGGCTGAGACAGGAG…	0.509363	534
ARL17A	FALSE	FALSE	FALSE	TRUE	CCTGAAAGCCAGTGGTGCAACCCCATCCCCACAACCTTCACCACCTCTAGCACCTCCAGTGATAAGCACTAATTGCCTATATACAACCCTTTTTTGTTTGAAATATCTAGAGTAATTTCTGTTTTCCTATCTGGGGTAGTGTAACATAAGAAGAAATATATATTTGGTCTCTGCCCCCAGTTCCTAACACAAAGCTCCTAAAACCCTTGGAAATTCCTGAATGATGGCGGTGCTAAGAGCATTGTCCTTTGTTAATTTATCATTTTTCTTTTCTCCTAGGTGTTTTTTCCTTTTTAAACTTTTCTTTTAGGTTAGGGGGTACATATGCACGTTCGTTATATAGCTAAACTTGTGTCATGGGGGTTTGTTGTACAGATTATTTCATCACCCAGGTACCAA…	0.463164	3312
ARL17B	FALSE	FALSE	FALSE	TRUE	ATCCTCCAATGTACCTGACTCTCCCTTCGCGAAGAGCATCCCCTCCATGGCAGAAATCTGAAAATGCCCCTGGGGAGACACATGCACAAGACAGTTCGTGAGCCACACATCTCCCCACACCAAGCTCCTCCATACAAGACCTCGGACTGCATCACGTAAATGCTTTTTCAGGGGCAAAATCTAGAGAATCTGAAATGGTGAGCCTTTTTCCTTTTTTTTTTTTTTTTTTTTTGAGATGAAGTCTCACTCTGTTGCCCAGGCTGGAGTGCAGTGCAGTGGTGTGATCTTGGCTCACTGCAAACTCCACCTCCTGGAGTCAAGTGATTCTCCTGCCTCAGCCTTCAGAGTAGCTGGGATCATAGATGCCCGTCCCCATGCCTGGTTAATTTTTGTATTTTT…	0.44522	1862
ARL2	FALSE	FALSE	TRUE	FALSE	ACCACTCCAGATGCCCCCCACCTAGCAGTCCAGGTCCCTCAACCTTCACCAAACACTACCCATGGGGGGTTGGGAGTCAGCCGGCCAAACTAACACTCCCCCTCCTCCACCCCAGCCTGCTGCTGCTACTGCTGCCCGCTGCTGCTCTGTGGCCACCCGGCTCCCATGGCGGGAGGGCTGTGCCCTGGCTGTCTCTCTGGCTCCTGACCTGGCCTTTGGCTACCATACCAAGAAGAGAGGGCTGGGCGGGGAGGAGCTGCTACTGCTGCTACCGAGGCTGTGGGCCTCATCCTTCACTCAGTTGTGAAATAAACCGCTCCTTGCCCCGA	0.629179	329
ARL2BP	FALSE	FALSE	FALSE	TRUE	GTCCTACCTCCAGCCAATGAATGGGATCATTCTGGATGTCACCAGCCCAATAGGCTCAGCTCATGATGACAGAACACATCTTGGAAAGACTGACTCTGTTATGTAACTCTTCATTTATGTTAAGTATTAATAGGTCAAAACCAAAATGACCTAACCCTCCTGGACCTATTTATCCTGAAACACCTTCTTGTATTCATTAACCATAGTACTCCTCCCCACCTCAAGTAGACACCTCTCTCAGGAGCTTCTGAGTCAGACGCCTCTGGAGCGAGCCCTATGTCAGGCACTCCACCTGGGGGGCCCTTCCCCAGCATACCTGCTGGTGTGTAAGTGTGGACTAACCCGCCGCCACCACCCTCTGTTCCAGCAGGCTCTGCATGAATCTTTGTGCACTTGCAC…	0.415205	1368
ARL3	FALSE	FALSE	FALSE	TRUE	AATCTAGACGAATGGAGATGCAGGAGCTGCGGGAGCCGAATTCGGTCCTGAAAAACACTAATTTGCTGCTTTCTGACCAAATGTTTTTCCATCTGTGTACAGCTCCAGCTGTTTGAAGAGAGGGAACAACACGGTTTAGAAAGAATCCCCATTCCAGCAGTAGATTTAACTGATCTCTGAGGTTCAGTATCATTTTTCAAATAAAGGAATTATATTATTTCCTCTGCATAATTGAAATAGTATTAAATGTCTCAAAGCACATGATTAGAAAATGAGATCTTTTAAATGAGCAAGAGATTGCATTGCAGTTTAGACAATTCCAGTGGGCTTTTTTTTCCTCTCAAAAAAAAAAAAAGAAAAAGAAAAAGAGGAAGAAGCAGCTTTGCTGAGTTCATTTAT…	0.484034	3163
ARL4A	TRUE	FALSE	FALSE	TRUE	ATATCAATACCTATTATATCTGTGTGGAGTAGGTTTTCTCTGGTCTGATTTTGACAAATAGAAGAGTGTCTACAGCGTGGTTTGCCTGTCTGCCCTCCTGGATGCTATTAAAGCTTTGTTTTGTTGAACAATCAGATGCCCAACTCTGTTGCCTTGTGGAAGATGAGTAAATGCAGTGCTTCTTAAAGTGGTCTCTTCTCCCTACCCCACAAATCTTTTGGTACTACCATTTGGGGAAGCCAAGCAAGGATAGTAAATTGACCAGAACACAGTTGTGGGAATTTGGTCTGAAGTTAGTGAAATAAAACTTTAAAGAGTGTCTGCCTAGTGTTTTGTGCTTACATCTTTCGGGGGGAAGCCTTTGCAAGAAAATTGCATACAAGGCTTTGTAACGATCAA…	0.336543	2077
ARL4C	FALSE	FALSE	FALSE	TRUE	TGCGCCCGGAGCGACCGGGGAGCGAGCGAGTGCGTCAAGAAAGAATGAATGGATGGATGGATGGTTGGATGGATGGATGGATGGATGAGCGAGAACCCGCGCCCGCGAACAAAGAGCGAACCAAAGCGATGCTTCGAATTTTTAAAACGGAATCTCTGCACCCAAATGCAGGACTGGTGACTTAAGGAGCTGCGAAGTCTGATTTACCGGCCTACTCTCGACCTGCCCCCCACCCCCAGCTCAGGGGACCTTTTGTCTGAACGCCAGAGCTACTGACCAGGTCGGGGGGCCGCGGTGGGGAGTGGAAGAGCCGGTCCTGCTGTCCGCCCTCCCAGCCCCAGGTGGAAGGCTCAGTTGTCGGAAAGACAAAAGCGATTTCTTCCCACTCCTGCAGGGCCA…	0.433097	2967
ARL4D	FALSE	FALSE	FALSE	TRUE	CCCAAGCCCCCCCTCCCTTTCCTCCCACCTAGTAGGGGTCTGCACACTTGGACAGCAGGGTGGGACCAGCCTGTGACCTCTCAGTCAGACTGGGGTGCAGGACCTGTCCACCTCAATGAAGGAGAGAGGAGCATGGGGTGTCCCGTTTTGGTGCCACACTGGGGTGGGGATGGGAGATGGGATGTCTTTGCATATCTCTCTCATCCTCTCTGGAGAAGTGGGCGCTGCAGGACTGTGGAGACGTAAATGTAAACTGTGACTCTACCTCGACCCTGTTTCTTATTTTTCTTCTCTGGCTAAAAATTTTTAATTGGATGTGTTTGGGGGCGGGGGGATGGAAGTGACTTGGAGAATGTGTTTGGGATGAAATAACTATCTCCCCTTCCTCTGTCCCCCAAC…	0.473091	799
ARL5A	FALSE	FALSE	FALSE	TRUE	TCTCTACTGACCTCTTCTCATAGATTTTGTATAAATGAAGTGCTGGACTTTACCTGAAAGCTGCAAAAATTAATGGTTTAGATATATTTATAATAAACTGATTTAAACTTTTTCTATAAGAAGAAAAATTAAGACCACTTATTTGAAAACAAAGATGAAGTCTCACCTTCCAGTTTGCTTTCTCATTAGTTTTTTCCAAAGTAAGTTATTGAAGCTGTGATTGACATTTTTCTCATAATGAATCCTCTCAGGACATTGTGTAGCCTATGGTAAGTACAAAGGGAGAGGAAGACATTTTGAATTTTAAGAGCTTTATTATCAGTTTAACCCTCCCTAGTTGAATGTTATTTTCTTCTTGTTCCATTAAGTCAGAATACAAATCAGCACAGATATTCGAAT…	0.324095	4474
ARL5B	TRUE	FALSE	FALSE	TRUE	CTTTTTTGCTTGAAAGAGACTGCTCTATTTATTCTGTGACATGAACATTTTTTCCTAGTACCTTTGGCTGCTAAGGCAGCAGCATGTTTAATTTATAACAACACAAACCTCTGAGAGCAACACTTGAATCAAGTGCAGCTGAACTGGAACATAAAAGATTTTTTCTTAACTTTTTTTTTTTAACACACTAATCTTCAGTTGGATGAATGTAATGTATAACTATGTTTTCAGCAACAATTCTTCTGTTTATTCTAATTAATCAGTGACTGCCTTGTAAGAAATGTTTGTCATATGCGTGATGTCTTCTGAAATATTCTTATAACCTTAATGACCAATTGCTTTCAATTCTTGACCAGCACTCCCTCCCAACCAGAGAATTACTGGTTTGATAGAGTAGTC…	0.312315	6423
ARL5C	FALSE	FALSE	FALSE	TRUE	ACCAATGGATGACTGACCATCAGAACCCTTCTCCTGCCTCTCTCCTGTGAGAATCTGGTTCACAGTTGGCTCCTGGGCCAAGCCAATTTGGCATCTCCCCACAGAGTTTTGCTCTTTGTTGCCCAGGCTGGAGTGCAATGGCATGACCTCAGCTCACTGTAACCTCCGCCTCCCAGGTTCAAGCAATTCTCCTGCCTCAGCCTCCGGAGTAGCTGGGATTACAG	0.544643	224
ARL6IP1	FALSE	FALSE	TRUE	FALSE	TTCATCTGCTTTAATCAGTGTGATTAATGCAGCACCCATTGCCCCGGGAACCGTTTCTGCTGTACTATCTGGATACTAAAATGTTACGGAAGTAGCTCTTTGTTCTCCCTCACTCTGCCCTTAGTTAATAGAAATTCAGACTCGCCAAGTAAGGCTTCGTGCATAGTGTCTTCATGTCGCGTATAGTTGAGCGCGTTCTTAGCAGTTGGCTTCATGGACAACTCATTAGTGTTTTGACTTTTCTTACCCAGCGTTAATTGAATTCTTGCTTTTAGACAACTTCCTTTTTGTAGTGGTGAACCTTGCCCTTTAGTACAGTTCAAGTGAATCTGGATAATTGTTCATCTTTGCTTTAGCTTAGATACCATGTAGTGGTCTGTGGCTACAGGAAGCTGGTTC…	0.367192	1585
ARL6IP4	FALSE	FALSE	FALSE	TRUE	AGAAGAAGGGCAAGGAGAAGGCGGAAGCACAGCAGAGCATCATCCGCAAGGTGGTGGACCCTGAGACGGGGCGCACCAGGCTTATTAAGGGAGATGGCGAGGTCCTAGAGGAAATCGTAACCAAAGAACGACACAGAGAGATCAACAAGCAAGCCACCCGAGGGGACTGCCTGGCCTTCCAGATGCGAGCTGGGTTGCTTCCCTGAGGGCCCCCGCTGGCCAAGGCCTGTGGACGACGCTGGCGGCCCAGCCTGGGCAGGTTTCAGGGTGCCAGTGGGAAGCCTGATGGGTGCTGGTGGCCTTTCCCCCGTGGATTGGTCTCTGGCCCAGCCCAGTCTCTTCTCAGGGGCAGGGGGTGGAGGTTGGGGTCACCGGCCTGCTTGGCACCCCCATCTGAAA…	0.616438	438
ARL6IP5	FALSE	FALSE	FALSE	TRUE	ACATAACTTACCTGAGCTAGGGTTGCAGCAGAAATTGAGTTGCAGCTTGCCCTTGTCCAGACCTATGTTCTGCTTGCGTTTTTGAAACAGGAGGTGCACGTACCACCCAATTATCTATGGCAGCATGCATGTATAGGCCGAACTATTATCAGCTCTGATGTTTCAGAGAGAAGACCTCAGAAACCGAAAGAAAACCACCACCCTCCTATTGTGTCTGAAGTTTCACGTGTGTTTATGAAATCTAATGGGAAATGGATCACACGATTTCTTTAAGGGAATTAAAAAAAATAAAAGAATTACGGCTTTTACAGCAACAATACGATTATCTTATAGGAAAAAAAAAATCATTGTAAAGTATCAAGACAATACGAGTAAATGAAAAGGCTGTTAAAGTAGATG…	0.335664	1430
ARL6IP6	TRUE	FALSE	FALSE	TRUE	ACCCACACTGGAGCGATATTGTTGGCAAAACTTAATCATGATTGTTTTGTAATAACAAGAAGGAGCATCACTGTCTACTCAGAAGACTGAGAAACCTGCTGTTCATTATGTAGTTCAGATATTTATCACAATCATCCTCATTATGGAAGACCTTTTAAAGCATTGTTTTAGAATGTCTGAGTATTAAGATACAGATTAATTGGGAATATCTGAGTATTAAGTACTTTCTTCAGAGTATAAGATGTTTACCTCATCTTTTTACTTTTGTGTGTGTAGTTCTTTCAAGTTGTAGGAAACATTTTAATGGAATTTAAACTCAAAAACTTGAATACAGGACAATGCTTGCCTTTTCATGTATGTACTACATTTTTTGCTAAGAAATACTGATATTTCTGTTTA…	0.275301	1413
ARL8A	TRUE	FALSE	FALSE	TRUE	CATCACCCTACAGTGGCTTATTCAACACTCGAAGTCACGGAGAAGCTGAGACTCCAGCCCTTCTCCCTCAGACCAGGGACCGTCATCATCTAAACCTGAAGCCGAGCTCCCCGCCCACCCCTGTCGTCCCCCTAAGCCCACCCCTCCTCACCCAGTGTGAGGAGGGCCCTCTGGGGACCCCAGAGTCCTGTTCTGCTGAGGTTTGAACTCCTGTTTTTATTGTAAAATAAATTGCCCCCCATTCTGGTCCCCTAACTTCTCACCCTTCCCCGCTGCCTTTGTCCCATCACCCAGCCCTGCCTCCCTCCCAGCAGCCCTGGGCCACAGCCCCCGCCCCTGGCTTTTCCCCGGCCCGCTCTTGTACCTCCCTTTTCAACACTCTCTGTTATTGTCCTGTGT…	0.535971	1112
ARL8B	TRUE	FALSE	FALSE	TRUE	AGCATCTCCTGAAGTCTTCCAGTCCTTCTTGGCTATAATCCTAGAATTATTGTCCGTTCCTCTGAAGTAATTCCCAGAATACGGTCCTTCCTAAACCCCAGAAATTGCCTTTTTCAGAGTTTATTTCTCATGTGCACTGCTGAAGATGAATATCCCTAATCCTTCATAAAGAATCAGCTAGAGTTGTCATGATAAAGTCAGCACACACAAAAAGGCTTCTTACACATACCTGTCTTAAACCATGTGTAGAGCTTTAAAAACAGAAAAAAAACCCCATATACTTATGACCATCTTAAATCAAGAAAATTGCATATTTCCATTCTGGTCTTTCTGGGCCAGATTTTTATATTGGTTTTCAGTAAATGTCTATCTATAATATTTCATTATAGAGTCCAGTAG…	0.357435	2199
ARMC1	TRUE	FALSE	FALSE	TRUE	CTTCACTTTTGGGCTCAAGGACTGTGTGAACCAACAAGGGGCCAGTTTTCCATTGTTGTGGTGAACTGTCAAGTGCAATTTGCAATAAGTTATCATGAAAAGTTTTTAGATTACACGATCGCATATGCTGCATTTCACGTTTTATTGGACATTTTACCCCACTGAGTGGTAAAAAGGACAGAGGCTACAGATGGAGTTGCTTTGTTTATGAAAGTATTTTGGTTTGTTTTCTTTCATTTAATTGCCTCATATTTAAAAACCATGGGTCCACTGTTAAAACCACATGTGTATGTGCAGCTTTACATTTTATTTTACGTGAAGCATGTGATTAGGAAAACTCATTTTCTTTTCAAGCCTCAGGACCTACCTGAAGAGAAGTTTTCTTGTAGCTCAAGTTGT…	0.321465	1938
ARMC10	FALSE	FALSE	FALSE	TRUE	TTGGTCATATTTTTCCAAAGAGTAATGCAGTCTGGATATAAACGTATTTTCTGTCTTCCTTATAAGGGGATTCTCCCAGCTGCTAAATTTAAACAGTAAATATCACATTTTGTCATTAACACAGCTATAACTTGCCGTGGTTCTCAGATTTATTTTGGACTATTTTGATGCCAAGTGAATATAAGAGCTTGTACTGAAACCATTTATTTCTTTCTATTTTGCTATTTGCAAATGCTTGTTATCTTCCCTACATGAAGTGGCAGTAACCTTTTTCACATTTAAGCTACCCTTCTACCTTTTGAAGTGATTTGCAGTTACTCATCTGAGACAGCATCAGTATTTGACTAAATCATTGTTTCACAACTGAATAGTCTTGTTCTTTTAGTAGCAACGAAATCC…	0.391412	1211
ARMC12	FALSE	FALSE	FALSE	TRUE	ACTGGGCTGGGGTGGCTGTCTAGGCCTGGCAGTCGAGCGAGAGCGGCACGGGCGGGACTCAGGTGAGCTCCGGAGGCTCCTCAACTCTTTGGAGTGCAAACAGGATGAGTATGCCAAGAGCATGATCCTGCACAGTATCACTCGCTGTGTGTACTTGCTGGAGGCTGAGGCCTCTGCTTGTACTACGGATGACATCGTGTTGCTGGGCTACATGCTGGATGACAAGGACAACAGTGTCAAAACCCAAGCTCTGAATACACTTAAAGCTTTCTCTGGCATCAGAAAATTCAGGCTC	0.542373	295
ARMC2	FALSE	FALSE	FALSE	TRUE	CATGATGCAGATTAACAGTAGAAACGAGAACTCACGTCTCCCTCATTCTTAAGAACTGGTAACAAACGTGAACATTTTTTTCAGCATTAACAAATGTGGAAAGTTTTTCAAGAACTGGTTTTAGTGAGTAGCTGAAGTATTTTTTAAAATTAAGCATTTCTTCTTGTTAGGTATTATGGAAAAATGAATATACACATTATATTTCCTGTTGAGAGAAATGTAAGATGAAAATATGTGCATTTTCAAGTAAATGACTTTTTCTTCTATTCTCTATTAAACAATTTAGTTCTAGTCTTAAAATCTTGATTTAACAATTTTGGAATTGAAGTGTTCATAAGTTAAATGAACTGTGCAATGAAGGCTGTTAGATTATATAGAAAGAAGGGTAGGCAACATGAG…	0.335073	958
ARMC3	FALSE	FALSE	FALSE	TRUE	GCCATCAGACGAACACAAGAGAGGCTCAAACAAGAAATTCACTGTGTACACTCTCTAAGACATTCTCCAAATTGATTTTATCTCTTTAAATAAAAACTTTAAATAAAAGTATTAGAAATGTTTTCTCTGCGTAGAAATTAGGAAGCTTGGAGTGAACTTTGCTGTGCTTCTGATTTCAGGCTTTTGGCAAGAGTTCTGTCTTATTAGGTCATTTTCCGCTCACTGACCCTCACATAAAGCTGATTGTTGTCGAAATTCATCCAGCCCACTGTGTCCTGAGGAGCGTCTCTGTCATTTAGGAATCACATGTAGCACTCAGCTGCTGCACCCAGGACAACACTGTGGCCTCATGACTGTCATCTTTCATGCCCAGAATGCTTCAGGCATGCTCAGTTAAGC…	0.320881	1044
ARMC4	FALSE	FALSE	FALSE	TRUE	GTTGAAATTCTGCCGCTTACTCAATGGCCTTGGGTGATGATGCTGTACCCTAATTCTAAAGGAAGCAATGAACCCCCTTTTCAGCTACCTTACTGATAAGCACTTATGTTCTGCCTTCTGCTATCCTGATGGTTCAGGTTGTCTGTCTTACTATCTACTTCTTGAGTAGAGAGACCACATTAAATTTATTGCTGTATCTCGCAGGGCATCTTGCTAGTGTGCACAGGCTCGCCTCCCTACCTCTGCCCCGATGGTGTGAAGGGGAGAGGGCGAGGTTCCTTAGTGGCAGGGCTTTGCTGTTCTTCACTCTCAGCCCCCTGAAAGCAGTTCTTCCTGCCTCTGAGCCTGTCTTTCCTTCTGCTGTTAACTTCTTTCCTACTTTTCTTGCATCCCTCTCTC…	0.440917	567
ARMC5	FALSE	FALSE	FALSE	TRUE	CTGCTCCCCACCAGCACGCTGACCTGTGAACCCCAGCCTCACCATCACCCCCAGCACTGCCAGGGACTGCCCTGTCTGCTGTGCCCTGACCACAGGCTGCTTCATGGCGTTACTGCTAGACCAAGGAGCCCTTCTGCTGGCCCTGTCCGGGCATAACAGAAGGCTCGCACTCTTGTCTTCTGGTCACACCTCACTATGTCCCCTCAGCTCCTATCTCTGTATGGCCTGGTTTTTCCCAGGTTATGATTATAGAGCGAGGATTATTACAATATTGGGATAAAGAGTAATTACTACAAACTAATGATTAATGATATTCATATATCTCTAAGATCTATATCTGGTATAACTATTCTTGTTTTATATTGTATTATACTGGAACAGCTCGTGTCCTCCGTCTCT…	0.610178	1965
ARMC6	FALSE	TRUE	FALSE	TRUE	CCCCAGGCCCAGTCTGGGCCGTGACTCTGGGCCCCCAGCTTCCGTGGAATCCAGCCGATGCAAACAGCTGAGGAGCGTCACCCTGGCTGCACCTCTCCGTGGTGTCCCCGTCTCCCCTGCCCCCAGCAGGAAAGGGTGCTCTCAGCTCAGCAGGGCTGGCCCAAACCTCTGACCCAGTCACCCCGCCCTATCCCTCCTCCCTGGAGACTCCCAGGATGTGGGAGAAAGATCTCGAATCTGCCCCAGACTGCCCTGACTTAACTTCTGGGCCAGTGTGACCTTGGGCAGTTCTCAAGCATTTCTTCATCTGTCATGTGGCGGGGTAGGTGCTCCTGAGCTATTTCGAGGACGGCCTGCAGTGCTGGCCCTGTCATTCCTGCTCCAGCCTTGCTCTCAGTC…	0.589219	1076
ARMC7	FALSE	TRUE	TRUE	FALSE	TCCATGGAGACTGCGAGACCGTGGCACCCCTACTGCTGGAGACCACAGTCCTGATGTGGACGCAGGGAACGGGGAGCACATACTGCCCCATTGGTGCCTTTTCAGCCATCTGAAAGGCGGGTTCTTTCAGCAGGACAGGCATTTACACTGATGAAACGCCACTGGGAGTGAGGAAGCCAGACTCCAGAGACACGGAGAAGATCAAACTGGAGCTGCGTTCATAGGCTGGCACTCTCAATCCTACATCAGGTGCCACCACCACCAGACTCAGGCCCTGGTGTAAGAAGCGGCCAAGTGCCTGGACCCAGAGGCTTTGCAGGACAGTGTTCTCAGGAGCTGGGCCTGAGGCTTAGGAGAGCTGCCTTCGCTGCAGGAAATCAGGGATTATCCCTTAACAGA…	0.565607	1227
ARMC8	TRUE	FALSE	TRUE	FALSE	TGGGAGTGCCCCTGGGCACCTGCGAGCATCCCACCTCCTTGTTTAAGGAAGTACAGGAACCAGCCTCATTTGATTCCTTCTATTTGCACAAGTCACCTTGGACTGCAGGGAGCTGTTTTGCAAAAGCAGTTTAGTAGGCTTAGATCTCAAATTCATCTTGAGAACATTTTTTTGAGGTAGTAATTTCCTCAGAAGACTCTTGTGTTTTGTTTTGGTTTTTTTTTCTGAGCTACTCGGACTCTTTATTAGAACAATCAATCATTTTCCTTTGGACCTACAATTTTTGCCTATGCTGCAGCCACTTTGTGAGTGAGAATGAATATGTCTGTGTGAACACACAGGCATGCGTGTGTATGTGCACGTACATGGGCCAGAATGAATGGATGTGTGTGTGTGAGG…	0.38366	2497
ARMC9	FALSE	FALSE	FALSE	TRUE	GGATGTCCCCGGGTGTCCCCATCACGTTGCCGGAGGACCAGCCAGCTTCCCGCTCTCAGCTGGCAGCAGCTGCCGGTGATGGATGTGAAGGGACAGTTGTCCACAAGACTCTGGGAGCTGAGGGGAGGCCGGCTCTCCAGGCAGCACCAGAGCAAGGCCATCGCAGCCCCGCCAGCCGGGTCACTTTCTCCCAGGGCAGAGCCACCAAGGAGGGCTGGGGAGAGCCTGGCATTGCCCTCCTGGAGAGGGGAATTTCCTGCTCACCCTTCACACACAGAGGAGAGGGGTGGCTTTTGCCCGCAGGAGATCTTCTGGCCCCAGAAACAGCAGGTGCTGGATTTGCAGCCCTGGCCCTCCAGGCCCCAACAGGGCGACAGTGTAGGGCCAGCCTGGAGCAGG…	0.514234	3302
ARMCX1	FALSE	FALSE	FALSE	TRUE	TTTGGAGTCTGTCCCAAACAATATTGAGATATTTGCAGTTGGTACGATGTGATTTGTAAATTCTTTGTTTTTCATTGTGCGTATATGGTAAAGAGATCTTTTCAGCTGCTATTTTGGAATAATGACTATCATATATCATAACAGTGACTGATGTTGGTTGTAATGGTTGGGTTTAGGATGAACCATTTTAAGGATGCCAAATGAAATATTAGTATTTGTACACAGAAAGAATTTATTGATTTGATCTTATTACCTAGATTGAGATTTTTTAATCTTTCCTCTACCTAAACTGACAATGAATTGGTTATACATCATGCATAAGCTACACTTTTATATTAGTTTATATTTGTTATTCTAAGACTTGTGTTTCATCAATAAAGTTGTGTTTTAAGCAGCAGA…	0.294118	408
ARMCX2	FALSE	FALSE	FALSE	TRUE	TTGGTTATGTACCGTCAAAAGACTTGAAGAAATTTCATGATTTTGCAGTGTGGAAGCGTTGAAAATTGAAAGTTACTGCTTTTCCACTTGCTCATATAGTAAAGGGATCCTTTCAGCTGCCAGTGTTGAATAATGTATCATCCAGAGTGATGTTATCTGTGACAGTCACCAGCTTTAAGCTGAACCATTTTATGAATACCAAATAAATAGACCTCTTGTACTGAAAACATATTTGTGACTTTAATCGTGCTGCTTGGATAGAAATATTTTTACTGGTTCTTCTGAATTGACAGTAAACCTGTCCATTATGAATGGCCTACTGTTCTATTATTTGTTTTGACTTGAATTTATCCACCAAAGACTTCATTTGTGTATCATCAATAAAGTTGTATGTTTCAA…	0.339853	409
ARMCX3	TRUE	FALSE	FALSE	TRUE	CACCTTGATTTTGTAATTTAGAAGCAACACACATTGTAAACTATTCATTTTCTCCACCTTGTTTATATGGTAAAGGAATCCTTTCAGCTGCCAGTTTTGAATAATGAATATCATATTGTATCATCAATGCTGATATTTAACTGAGTTGGTCTTTAGGTTTAAGATGGATAAATGAATATCACTACTTGTTCTGAAAACATGTTTGTTGCTTTTTATCTCGCTGCCTAGATTGAAATATTTTGCTATTTCTTCTGCATAAGTGACAGTGAACCAATTCATCATGAGTAAGCTCCCTTCTGTCATTTTCATTGATTTAATTTGTGTATCATCAATAAAATTGTATGTTAATGCTGGAAAGAAAAAAAGAAGAAAGAAAGAAACCATCCCTGTCCTTCAGTT…	0.348028	1724
ARMCX6	FALSE	FALSE	FALSE	TRUE	ACGGCCCTCTCGAACACAATGGGACGGAATCCACCCACAACGCGCTTGGTTTGCAGATGTCAAAGAATCTGCAGAGGGTGCTACTGAAGATCCAGCCTTAGCCAATCACCACCTCATTGGGTGAAAGTTCCAGGGCTCAATCCAGGACCACACTCTTATTGGCCAGGCAGGGGCTCCCACAGAGCTTTGAGTAACTTCTTGGTTGTGCAGTCTGCAGGCAATGTTGGCATTGTAAATTCCTCCCTTGCAGCCTCCTTCATGTGGTGAGGGGATCACTTCAGCTGCCTGCTGTGGACAAAGAACATCAAATTACAGCATCACGAGTGCTATTGTTGCCTGTGGTGGTCTCCCTGTCCAAGCGGGACCGCTTTGCAGAGACCAGAGGCATATCGCGGCTTG…	0.488294	598
ARMS2	FALSE	FALSE	FALSE	TRUE	TTCTGCCAAAACATATCTCCTTAAAAGCCAACTGGAGCTTCTCATCAGCATCAATGTGAAGCCAAAAATCCTTAGGAGGACAGAGGGAGTCCCTCACAACCTAGACTGGTCCCCTTCCCTCCAGCTGCCTCAACTGTCCACAGGACTCTCTTCCCACCTGCGGCCACACTGTGCAACCTGGAATTTCCCCACCTGGGCGGACTCATCACGTCATCACCAATTGGATGCATCTTCTGCTCTGTGCAGCTGGTGAAATCTTTCTCAACCCTTGAGATGCAGCCCAATCTTCTCCTAACATCTGGATTCCTCTCTGTCACTGCATTCCCTCCTGTCATCCTGCCTTTGTTTTCTTGCCCTCCTTTCTCTCCCGGGTGATAGGCATTAACTAAAATTAAATAA…	0.486874	419
ARNT	FALSE	FALSE	FALSE	TRUE	AACTATTGGGGTGAGGATAAGGGGTGGGGGAGAAAAAATCACTGTTTGTTTTTAAAAAGCAAATCTTTCTGTAAACAGAATAAAAGTTCCTCTCCCTTCCCTTCCCTCACCCCTGACATGTACCCCCTTTCCCTTCTGGCTGTTCCCCTGCTCTGTTGCCTCTCTAAGGTAACATTTATAGAAGAAATGGAATGAATCTCCAAGGCTTTTAGGACTGTCTGAAAATTTGAGGCTGGGTGAAGTTAAAACACCTTTCCTTATGTCTCCTGACCTGAAATTGTATAGTGTTGATTTGTGCTGAGATCAAGAGGCAGGTTAGAAGAACCTGACATCCACTGTTTGCCTTGGATAGTATGGCTTGTTTTTGGAAAGAAATTCTGAAGAGAGTGGAGGAGAGGA…	0.407599	2316
ARNT2	FALSE	FALSE	FALSE	TRUE	CTGCGGCCAGAGTGAGGCTCCTGCTGTACAGTGCCACCCATACTGTGATGTCGATGCCCATGTGAATGAGGCCCACCCTCGCCCTGCTTGCCCTGCCGCAGGCCCCCCACCAGAAGCCATCTCCCCCGCTGTGTGTCCCCAGGCGCATCATTGCTCCACTCTCCCCTGCAGCCGCGGCTGCTCGGCCACTGACCAGGGGCCCTGGCAGACATTAGGGGATCAGTTGTATTTATTGTATTTTATCTGTGTGTGCTCAGGAGGTGAGCCTAGTGGGTCCTTAAGTTTGGTTGTGAATAATCTCTTGATAGACAATTTATACCCATGAAAGTTCAGCCAATGCCCAGAGTGACCAAGCAGCACCAGCAGGCCTGCCCAGGATGCTGAAAGCAGATTTCTTCT…	0.515452	4239
ARNTL	FALSE	FALSE	FALSE	TRUE	GCCGAATGATTGCTGAGGAAATCATGGAAATCCACAGGATAAGAGGGTCATCGCCTTCTAGCTGTGGCTCCAGCCCATTGAACATCACGAGTACGCCTCCCCCTGATGCCTCTTCTCCAGGAGGCAAGAAGATTTTAAATGGAGGGACTCCAGACATTCCTTCCAGTGGCCTACTATCAGGCCAGGCTCAGGAGAACCCAGGTTATCCATATTCTGATAGTTCTTCTATTCTTGGTGAGAACCCCCACATAGGTATAGACATGATTGACAACGACCAAGGATCAAGTAGTCCCAGTAATGATGAGGCAGCAATGGCTGTCATCATGAGCCTCTTGGAAGCAGATGCTGGACTGGGTGGCCCTGTTGACTTTAGTGACTTGCCATGGCCGCTGTAAACAC…	0.40663	905
ARNTL2	TRUE	FALSE	FALSE	TRUE	CCTTTGATTTTTAACTCCAAAAATGAGAAACATTTTAAAGCATTTCATTTACGAAAAACTGTCTCAACTATTCTTAAGTACTGTATTGATATTGTTTGTATCTTTTATTAATGTTCTACCACTTTTTATAGATTTGCATCTTCCTGTCACAGGGATGTGGGGAAATACGTTTTCCTCCCAAGAGAACCAAGTTTATTATAGACTCCTTTATTCAGTGAAATGGCTTATAATCCACTAGTTGCCATATTTTTGCTAAAATATTTCTAACCAAGAATACTACTTACATATTGTTTTGGCTTTGTTTTATTTTTGATGCAGTTTTTTTTAGTTGAGGTAATGTAATATATTGATGTTTTCCTTTGTGTCTAAGATTCATTTATAATAGTAGGTTTGTATAAT…	0.384066	4757
ARPC1A	TRUE	FALSE	FALSE	TRUE	CCTTCGTCTCCAAGTTAGATATTCCAAAACAGAGCATCCAACGCAACATGTCTGCCATGGAACGCTTCCGCAACATGGACAAGAGAGCCACAACTGAGGACCGCAACACGGCCTTGGAGACGCTGCACCAGAATAGCATCACTCAAGTCTCTATTTATGAGGTGGACAAGCAAGATTGTCGCAAATTTTGCACTACTGGCATCGATGGAGCCATGACAATTTGGGATTTCAAGACCCTCGAGTCTTCCATCCAGGGCCTCCGGATAATGTGAAGCTGAGTGAGCCTCCGCCATCCAGCATGACAAACTGTGGCCGACCGCAGCTGTGCCGTGGCACGATGGCGAGGAAGCCAGCCCCAAGGAAACACTGAAAACACATATCACGCCAATGCCGTGTGGT…	0.453427	569
ARPC1B	FALSE	FALSE	FALSE	TRUE	CAGGGCCTGAAGGACTTCAGGGGGCCCCTGCAAGGCAGAAGAGGAGAGACTGAGTCATGAAAGAGATTGCCATCTGCCCCAACAACCATGAGGTGCATATCTATGAAAAGAGCGGTGCCAAATGGACCAAGGTGCACGAGCTCAAGGAGCACAACGGGCAGGTGACAGGCATCGACTGGGCCCCCGAGAGTAACCGTATTGTGACCTGCGGCACAGACCGCAACGCCTACGTGTGGACGCTGAAGGGCCGCACATGGAAGCCCACGCTGGTCATCCTGCGGATCAACCGGGCTGCCCGCTGCGTGCGCTGGGCCCCCAACGAGAACAAGTTTGCTGTGGGCAGCGGCTCTCGTGTGATCTCCATCTGTTATTTCGAGCAGGAGAATGACTGGTGGGTTT…	0.593801	613
ARPC2	TRUE	FALSE	TRUE	FALSE	ACTCAGAGGAATACAACCACCCTTTCTACAACAAGAGTCCTCGACAAGATGATCTTGGAAGACTTTTGCAGCTCTGAAGTGCTGTTACCTGGAGATTTCGATGGGGTCCTCTATCATATTTCAAATCCTAATGGAGACAAAACAAAAGTGATGGTCAGTATTTCTTTGAAATTCTACAAGGAACTTCAGGCACATGGTGCTGATGAGTTATTAAAGAGGGTGTACGGGAGTTTCTTGGTAAATCCAGAATCAGGATACAATGTCTCTTTGCTATATGACCTTGAAAATCTTCCGGCATCCAAGGATTCCATTGTGCATCAAGCTGGCATGTTGAAGCGAAATTGTTTTGCCTCTGTCTTTGAAAAATACTTCCAATTCCAAGAAGAGGGCAAGGAAGGA…	0.418692	535
ARPC3	FALSE	FALSE	TRUE	FALSE	AGGGAGCCCGGGCAGCCACCGTCTCCAGAGCCCTGGGCAGCATTTTCCAGCAAGATGTACACAATCTTTTGCCTTTATTTCGTAAAGTTTTATACAGAAGAGAGAAGAGCATGTCTTTACTTGAAAAACTCTTGATCAAGAATTTGGGTGGGAGAAAAGAAAGTGGGTTATCAAGGGTGATTTGAAATTTTCTGCAGCATTAAAGCTGGCGCTTAATAAGAATAAGTAATAATAAAGAAATTTCTAACATTCCATGTCAGAAAAACTTTATTGCCAGTCTTTGACATTCACTTACAATTTGTTTTGAGATAAAATTCACATTCCATAATG	0.369697	330
ARPC4	TRUE	FALSE	TRUE	FALSE	ACCATCTGGCTGGATCTCGTGGCCTTCCCCCTCAGACTACCCATGTCTCCACGAAGGCGTCCTGGAGTCACTCCCCGAGCAGCGCGGCGGCGGCAGGGAGTTGGGTTGGGGTGGGCATTTGATGCGGGAGGTGGGTGGTGTGCTTGCTAGCTGGGCAAGAAAGCAGCAGTGGACCTGCCCCAAGGCCACACGTGCCTGGTCAGGCTGGCTTCTGATGTTCAGTCCCCTGGGCCGGGACAGATTTTTTTTAACGTCTTGAAACTTAAACTCTGTGCTTGTAGGATACTGTAACCTTTTTGTCTTTTTTTTTTTTTTTTTTTTTAAACCTCCACCTCCAGTGGCTGTGACTGGTCCCAGTGATTATACGTTATTGGTTGCTGTGGGTCTGGGCGGGCCTGG…	0.511582	1511
ARPC5	TRUE	FALSE	FALSE	TRUE	TCTGGCAGGAAGTGGATTATCTGCCTCGGGAGTGGGAATTGCTGGTACAAAGACCAAAACAACCAAATGCCACCGCTGCCCTGTGGGTAGCATCTGTTTCTCTCAGCTTTGCCTTCTTGCTTTTTCATATCTGTAAAGAAAAAAATTACATATCAGTTGTCCTTTAATGAAAATTGGGATAATATAGAAGAAATTGTGTTAAAATAGAAGTGTTTCATCCTTTCAAAACCATTTCAGTGATGTTTATACCAATCTGTATATAGTATAATTTACATTCAAGTTTAATTGTGCAACTTTTAACCCCTGTTGGCTGGTTTTTTGTTCTGTTTTGTTTTGTATTATTTTTAACTAATACTGAGAGATTTGGTCAGAATTTGAGGCCAGTTTCCTAGCTCATTG…	0.383039	6686
ARPC5L	TRUE	FALSE	FALSE	TRUE	AAAAAATAAAAAGACTCATGTTACCTTGAGAAGAATTCTGGATGCCCAGGCTGGTGAAGAAGGGATTGACAATGGACCATCTTCCTAGGAACTCCCAAGTAAACTATTTCAGGACATGTATCTGCTGAAATGTATTTTATTTTCAAGGTGGAGGGGAAAATCGTCTGTTTCCTAAATCCTGTTTAGGATCTGATAGTCTATGCCTTTGTCTCCGAGTACTGCAGAACTGACATTTTGACGGTCTACCAGCGTGGCGGCTGGTGTTGGTCAGATGCACCTGTGTGCACTGGGGGAGGGATGGTTTGGGCAGGTGCAGATCCAAGGGCTGTGGTAAACGGGAGAGCTTGTGTTTTTGAAGTGGAAAAAAACCCAAGAGTTTGTACAGACATCCTGTCTTCC…	0.441362	793
ARPP19	FALSE	FALSE	FALSE	TRUE	TTAAGAGGCTGAACTGCATGAATCTGCTAAATCTCATTATTTCTCCTTAATATGTTACTTATCTACTTTTTATTTCCTTTCATTCACTAGTCATTTGAGACTGACAGCTTTGCAGGTAGCAGTAGTGTGTGCTGCTATTGTGGAATATACGTGTGTAGAGTTTTTGATTAGTTTAACAGTGCACTGGTGAAGAGGACATGTTAGAGCAACATAAGTAAACTACTTGAAAATAGTTGTATATATTACCTAACTTCTAGTGTAGTACTGGTTCTAACAAGTAACAAGCAAGTTTTAAAATTTTAATGTTTTGGCTTTCATTACTTCATCTTAATTATAGCTTTGTATGTTACTCTTATTTAATATAATCTCTATTGTATTGATTTCTTCTGTATTTACCTT…	0.354469	4889
ARPP21	FALSE	FALSE	FALSE	TRUE	AAACTGCAAATGGAAAGGAATTCAAAAGAATTTAGATTAAAAGTTAAATAAAAAGTAGGCACAGTAGTGCTGAATTTTCCTCAAAGGCTCTCTTTTGATAAGGCTGAACCAAATATAATCCCAAGTATCCTCTCTCCTTCCTTGTTGGAGATGTCTTACCTCTCAGCTCCCCAAAATGCACTTGCCTATAAGAAACACAATTGCTGGTTCATATGAAACTTAGGAAATAGTGAATAAGGTGCATTTAACTTTGGAGAAATACTTTTATGGCTTTGGTGGAGATTTCTCAATACTGCAAAAGTTGTCCAGAAATGAATCTGAGCTGATGGTGACTTTAAGTTAATATTATTAATATATCACTGCATATTTTTACCCTTATTTTTGCTCCTTACAGCAAGA…	0.360603	1858
ARR3	FALSE	FALSE	FALSE	TRUE	TGGAATACAAGATTGGGAAGCCCCATTCCCCTCTTCCCATTTCCACCCTCCATGTTATGACGATAGAAATGTGAAAATGCTTCCTTGGGGTGCTTTCAATACATGTGCAGTGGAAACATA	0.441667	120
ARRB1	FALSE	FALSE	FALSE	TRUE	ACGGGCCGGCCCTGCCTCCACGTGGCTCCGGCTCCACTCTCGTGCACTCGGATGCTTACTCGTCTTCTTCCTGTTCTGGTTTCTTTTCCCCTTTGTTCTTCCAGTTTCTACCAGGGGGCCCCGTGGGCTTCCAGATCACGGTGATGAACCTCTGGCCTCAGGATTGGCCCCACATCACCACGCCAACAGGACCACAGCGCACTGGCTCCACCCCATCTCTGCCATCTCCACTCCCCTCCTTTTCATGCTGTCTCCCAGAAAAGCTGCCAGGGCTCTGGCCTTGGAATTGGACTTGAGATGGGGAGCAGACAGGGGAGGATGGGGAATGTGGGACACGGTGTGGTGGGCATGAGGGCTTGGAGGGGTGGGGATGAGGGCTCAAGACACGAGAGAAGATGT…	0.548208	1981
ARRB2	FALSE	FALSE	FALSE	TRUE	ATTTGATACCAACTATGCCACAGATGATGACATTGTGTTTGAGGACTTTGCCCGGCTTCGGCTGAAGGGGATGAAGGATGACGACTATGATGATCAACTCTGCTAGGAAGCGGGGTGGGAAGAAGGGAGGGGATGGGGTTGGGAGAGGTGAGGGCAGGATTAAGATCCCCACTGTCAATGGGGGATTGTCCCAGCCCCTCTTCCCTTCCCCTCACCTGGAAGCTTCTTCAACCAATCCCTTCACACTCTCTCCCCCATCCCCCCAAGATACACACTGGACCCTCTCTTGCTGAATGTGGGCATTAATTTTTTGACTGCAGCTCTGCTTCTCCAGCCCCGCCGTGGGTGGCAAGCTGTGTTCATACCTAAATTTTCTGGAAGGGGACAGTGAAAAGAGGA…	0.507993	563
ARRDC1	FALSE	FALSE	FALSE	TRUE	TGGCTTTCTCATAGGCGCTGGGTGGCTGAAGGGGCCACCTCCCCCTTGTGCTGGATTTGGGTGGGCTCTGACCCCTGGCACAGCTGTTTCACCCTTGCCCCATTCCCAAACCACTCTCCTGTTCAAGCCAAGCTCTTATCCTCAGTCCTTCACCCAAGCCACAGCCCTGTGCTGCTGTGGCGCTGGTGACTGAGACAGGGAGACCCAGTGTGAGCTGGTCAGCTGCAGTGCCCACTCTTATCCTGGCCCTGTGGCCACCTCAGGCCACCTCAGGGGGGGACTGCCCCCCACCTCCCTCCTGTCTCTGCAGGGAGCCTGCCCGCTGGAGAGCACAGCTTCCCCTTCCAGTTCCTGCTTCCTGCCACTGCACCCACGTCCTTTGAGGGTCCTTTCGGGAAG…	0.612705	488
[truncated: 15,480 more rows]

## Sheet: README
Vertebrate 3′ UTRs were aligned with Clustal Omega for 9 vertebrate species (Bos taurus, Canis familiaris, Danio rerio, Gallus gallus, Homo sapiens, Macaca mulatta, Mus musculus, Rattus norvegicus, Xenopus tropicalis) and scored for evidence of strict conservation or rapid evolution using the phyloP program. The indicated columns denote the presence of strict conservation or rapid evolution at a …
